# Supplementary material for: Impact of energy limitations on function and resilience in long-wavelength Photosystem II
Source: eLife. 2022 Jul 19;11:e79890. doi: 10.7554/eLife.79890 (PMC9439682; doi:10.7554/eLife.79890)
Supplement: Appendix 1—figure 1—source data 1. [file elife-79890-app1-fig1-data1.xlsx]

## Sheet: Sheet1
Synechocystis
	Control 1	Control 2	DCMU 1	DCMU 2
0.001108	1	1	1	1
0.0011858	0.902578	0.863067	0.860883	0.943117
0.0013242	0.796546	0.818398	0.896569	0.90308
0.0015703	0.694099	0.722107	0.867719	0.936399
0.002008	0.569437	0.634329	0.866742	0.915529
0.0027863	0.700885	0.5627	0.840756	0.9515
0.0041703	0.50705	0.469091	0.858546	0.925132
0.0066314	0.485577	0.457872	0.93185	0.917878
0.011008	0.474388	0.379279	0.869743	0.922871
0.0187908	0.409436	0.358508	0.877956	0.910431
0.0326308	0.397731	0.343511	0.858588	0.921685
0.0572421	0.282717	0.32074	0.808527	0.907151
0.101008	0.252183	0.214722	0.774304	0.853697
0.178836	0.229272	0.21952	0.760582	0.805792
0.317236	0.198166	0.160982	0.642665	0.752705
0.563349	0.173891	0.154148	0.561896	0.707219
1.00101	0.194393	0.127789	0.623628	0.711005
1.77929	0.131632	0.124112	0.531907	0.565968
3.16329	0.0976229	0.0874517	0.485589	0.495476
5.62442	0.0425412	0.0451744	0.408972	0.341332
10.001	0.0220182	0.0848407	0.286337	0.295454
17.7838	-0.00638967	0.0645643	0.162874	0.160665
31.6238	0.00340795	0.0663766	0.101351	0.047481
56.2351	-0.0334731	0.0275422	0.0611263	0.0468689
100.001	-0.0301651	-0.01529	0.0825323	0.0312608
