# Supplementary material for: Impact of energy limitations on function and resilience in long-wavelength Photosystem II
Source: eLife. 2022 Jul 19;11:e79890. doi: 10.7554/eLife.79890 (PMC9439682; doi:10.7554/eLife.79890)
Supplement: Appendix 2—figure 1—source data 1. [file elife-79890-app2-fig1-data1.xlsx]

## Sheet: A. marina
Repeat 1																			Repeat 2																			Repeat 3
	1 flash			2 flashes			3 flashes			4 flashes			5 flashes			6 flashes				1 flash			2 flashes			3 flashes			4 flashes			5 flashes			6 flashes				1flash			2flashes			3flashes			4flashes
4.24	23		4.31	43		3.86	45		3.9	29		3.92	30		4.7	33			4.44	13		4.17	32		3.9	22		4.65	17		4.33	16		4.34	36			4.38	11		4.04	18		3.28	11		4.2	11
4.39	24		4.17	43		4.12	43		4.06	27		3.95	31		4.77	37			4.59	16		4.42	30		3.86	21		4.81	16		4.91	17		4.35	36			4.58	12		4.31	16		3.55	15		4.35	13
4.54	24		4.65	46		4.19	42		4.33	32		4.25	31		5.04	39			4.85	16		4.7	31		4.31	23		5.12	16		4.81	16		4.69	36			4.69	12		4.45	15		3.74	13		4.6	14
4.97	27		4.73	53		4.48	46		4.56	32		4.48	29		5.22	38			5.06	15		4.95	35		4.5	23		5.39	18		5.14	14		4.92	37			4.94	13		4.77	20		3.95	14		4.74	13
5.13	29		4.99	50		4.69	44		4.71	30		4.69	30		5.41	41			5.23	16		5.16	33		4.52	22		5.35	17		5.27	16		5.19	36			5.14	14		4.88	18		4.13	14		4.99	16
5.25	31		5.41	47		4.85	46		4.94	28		4.92	27		5.52	39			5.39	17		5.17	32		4.92	25		6.03	15		5.38	17		5.08	37			5.35	13		5.14	20		4.35	14		5.25	17
5.54	32		5.19	53		5.03	47		5.17	33		5.02	33		5.77	40			5.68	16		5.35	34		4.93	23		6.17	19		5.79	18		5.58	37			5.53	12		5.35	19		4.56	16		5.37	16
5.72	31		5.77	56		5.23	49		5.39	30		5.28	33		6.03	39			5.85	19		5.67	33		5.17	24		6.03	21		5.95	16		5.52	37			5.7	14		5.49	19		4.85	16		5.64	18
5.91	31		5.85	57		5.48	44		5.62	34		5.39	36		6.17	39			6.06	22		5.91	35		5.56	26		6.25	18		6	19		6.03	38			5.94	13		5.67	20		4.95	18		5.74	16
6.19	29		5.98	58		5.73	46		5.78	33		5.74	36		6.25	41			6.25	20		6.08	31		5.56	23		6.58	17		6.25	19		6.04	42			6.1	15		5.93	22		5.22	16		6	19
6.39	35		6.37	57		5.91	49		6.04	33		5.92	32		6.56	42			6.43	18		6.22	33		5.92	24		6.64	19		6.72	19		6.18	43			6.39	15		6.18	23		5.39	14		6.17	16
6.54	32		6.31	61		6.1	51		6.19	35		6.16	36		6.74	43			6.66	22		6.42	36		6.13	24		6.94	21		6.44	19		6.52	43			6.6	14		6.24	24		5.56	20		6.42	20
6.68	36		6.68	59		6.28	50		6.33	34		6.35	36		6.93	41			6.85	21		6.47	35		6.39	24		7.13	21		6.88	20		6.69	39			6.72	16		6.52	23		5.81	18		6.6	17
6.92	34		6.94	61		6.48	52		6.6	34		6.5	34		7.15	45			7.06	21		6.73	37		6.56	27		7.35	19		6.99	18		6.87	39			6.91	14		6.63	27		5.94	17		6.78	21
7.14	35		7.06	60		6.69	53		6.75	36		6.66	37		7.31	43			7.24	21		6.97	37		6.6	28		7.56	18		7.18	20		7.18	42			7.13	17		6.91	25		6.18	19		7	23
7.27	40		7.43	63		6.89	49		6.99	35		6.91	35		7.56	54			7.63	23		7.29	37		6.83	28		7.71	22		7.37	19		7.39	40			7.31	16		7.06	28		6.37	18		7.2	22
7.52	40		7.42	61		7.02	57		7.19	40		7.1	37		7.77	45			7.74	24		7.46	34		6.91	27		7.84	21		7.24	18		7.67	42			7.43	19		7.24	26		6.63	19		7.42	24
7.67	38		7.48	63		7.27	58		7.43	37		7.27	40		7.98	50			7.99	23		7.58	40		7.18	27		7.99	22		7.9	18		7.74	41			7.74	18		7.44	31		6.85	21		7.59	22
7.81	37		7.85	67		7.52	56		7.68	38		7.52	41		8.17	48			8.23	27		7.74	36		7.33	27		8.32	20		7.84	21		8.13	47			7.9	16		7.58	29		6.99	24		7.71	22
7.96	44		7.81	65		7.62	59		7.88	40		7.65	42		8.38	49			8.32	25		7.99	31		7.5	27		8.24	23		8.02	21		8.38	45			8.13	21		7.84	29		7.14	23		7.96	25
8.25	45		8.3	66		7.83	58		8.05	38		7.89	41		8.61	50			8.53	25		8.13	40		7.77	28		8.66	23		8.23	21		8.6	47			8.29	18		8.04	30		7.42	24		8.21	26
8.42	40		8.36	64		8.05	61		8.27	40		8.09	40		8.85	50			8.78	30		8.23	40		7.85	30		8.85	24		8.35	22		8.72	49			8.56	22		8.17	31		7.6	24		8.42	26
8.63	38		8.59	66		8.15	59		8.32	38		8.23	40		9.01	53			8.92	29		8.59	42		8.1	31		9.18	24		8.77	22		8.78	51			8.65	23		8.38	31		7.79	26		8.55	25
8.82	41		8.75	68		8.49	62		8.63	44		8.42	40		9.22	51			9.12	31		8.66	41		8.45	32		9.22	25		8.97	26		9.37	50			8.84	21		8.57	33		7.92	26		8.77	25
8.93	44		9.06	70		8.59	63		8.8	42		8.67	41		9.44	55			9.31	31		8.86	43		8.69	30		9.13	23		9.03	25		9.36	53			9.07	24		8.72	33		8.15	27		8.96	27
9.16	46		9.13	69		8.75	62		8.97	40		8.78	41		9.58	54			9.56	31		9.03	48		9.03	33		9.67	26		9.53	26		9.52	53			9.31	27		8.99	38		8.32	27		9.12	27
9.43	43		9.35	78		9.14	58		9.2	42		8.99	36		9.92	54			9.74	31		9.37	46		9.09	34		9.72	29		9.81	26		9.49	56			9.52	21		9.26	39		8.59	28		9.35	24
9.6	46		9.62	70		9.27	65		9.31	42		9.13	43		10.04	53			9.81	33		9.62	46		9.45	37		9.98	25		9.95	27		9.66	58			9.6	23		9.36	33		8.78	29		9.54	27
9.85	44		9.75	72		9.38	62		9.58	39		9.39	44		10.32	58			10.05	31		9.87	49		9.79	37		10.17	31		10.26	26		9.94	59			9.94	21		9.58	39		8.96	28		9.73	28
10.04	47		9.95	74		9.64	68		9.74	39		9.64	46		10.44	56			10.26	35		9.99	49		9.96	41		10.36	29		10.11	29		10.36	62			10.07	22		9.72	40		9.09	27		9.88	28
10.23	48		10.07	72		9.84	65		9.93	41		9.83	43		10.63	61			10.44	36		10.02	52		10	38		10.47	31		10.52	26		10.52	63			10.25	24		10.02	40		9.35	30		10.13	29
10.49	44		10.45	76		10.02	65		10.13	47		10.06	43		10.81	65			10.67	34		10.31	54		10.15	41		11.06	30		10.55	32		10.87	66			10.6	24		10.17	40		9.53	30		10.34	33
10.66	47		10.56	84		10.35	67		10.31	41		10.28	42		11.06	65			10.87	35		10.47	53		10.27	44		10.7	30		10.85	33		10.83	65			10.7	29		10.34	44		9.7	33		10.5	32
10.81	50		10.88	83		10.46	69		10.52	49		10.4	42		11.24	68			11.11	40		10.85	57		10.19	45		11.29	32		11.11	32		10.94	62			10.88	27		10.62	42		9.96	30		10.68	32
11.06	51		10.93	82		10.7	74		10.72	48		10.7	51		11.49	67			11.35	37		11.03	62		10.23	46		11.47	33		11.29	35		11.06	66			11.1	24		10.74	47		10.13	35		10.95	34
11.29	54		11.17	83		10.95	77		10.88	48		10.88	49		11.66	69			11.44	39		11.25	62		11.03	43		11.53	37		11.44	33		11.51	69			11.27	27		11.02	49		10.27	35		11.14	34
11.31	50		11.36	87		11.15	76		11.09	49		10.99	55		11.89	71			11.63	38		11.57	64		11.09	50		11.57	37		11.76	35		11.62	72			11.52	29		11.2	43		10.45	35		11.38	37
11.72	50		11.6	84		11.35	79		11.27	51		11.25	56		12.02	78			11.82	39		11.7	67		11.38	49		12.03	38		11.94	37		11.82	71			11.67	25		11.42	50		10.66	38		11.58	33
11.81	57		11.74	90		11.61	83		11.52	55		11.56	57		12.31	80			11.96	39		11.85	66		11.55	49		12.33	40		12.1	36		12.1	74			11.88	25		11.6	51		10.88	36		11.77	35
12.11	53		11.89	96		11.91	78		11.76	61		11.61	60		12.63	84			12.22	42		12.2	67		11.74	51		12.46	37		12.31	39		12.12	76			12.14	31		11.8	48		11.04	34		11.99	35
12.13	57		12.28	100		12.17	83		11.85	58		11.8	55		12.77	83			12.48	41		12.2	73		11.87	52		12.55	40		12.44	37		12.31	76			12.35	30		12.02	53		11.23	37		12.16	32
12.55	58		12.38	101		12.24	97		12.14	60		12.01	64		12.98	88			12.65	41		12.48	72		12.37	59		12.95	40		12.74	38		12.49	77			12.57	30		12.23	53		11.5	34		12.37	34
12.82	58		12.49	106		12.44	97		12.28	64		12.28	67		13.24	93			12.8	40		12.59	74		12.48	55		13.08	41		12.97	37		12.71	79			12.74	31		12.46	51		11.64	45		12.52	37
12.72	58		12.59	112		12.65	96		12.55	64		12.39	67		13.38	94			13.1	43		12.77	79		12.88	59		13.27	42		13.14	42		12.8	90			12.98	30		12.71	52		11.93	41		12.76	36
13.23	61		13.03	114		12.81	101		12.74	64		12.65	69		13.53	97			13.29	44		13.1	82		12.82	58		13.35	43		13.38	44		13.03	89			13.18	29		12.85	55		12.12	43		12.99	41
13.15	63		13.12	109		12.95	107		13.02	71		12.89	74		13.77	99			13.46	44		13.25	86		13.15	64		13.77	44		13.47	41		13.14	87			13.32	34		13.1	56		12.2	37		13.25	42
13.56	64		13.38	122		13.15	106		13.18	68		13.03	71		14.02	108			13.7	43		13.61	80		13.08	64		13.96	47		13.74	44		13.52	89			13.56	34		13.3	59		12.56	41		13.4	40
13.55	65		13.46	127		13.42	111		13.27	73		13.27	78		14.07	109			13.9	44		13.7	87		13.51	67		14.2	51		13.81	44		13.61	86			13.67	34		13.42	62		12.74	46		13.59	40
13.94	62		13.93	123		13.66	115		13.52	78		13.47	82		14.35	115			14.02	45		14.04	92		13.46	70		14.48	45		13.94	46		13.73	93			13.93	31		13.61	62		12.92	44		13.77	40
14.13	66		13.93	142		13.77	123		13.85	80		13.7	79		14.53	121			14.31	47		14.17	95		13.63	66		14.75	47		14.26	47		14	93			14.18	36		13.88	56		13.1	46		14.02	42
14.26	65		14.17	139		13.89	125		14.04	77		13.89	79		14.67	122			14.45	50		14.41	90		14	65		14.84	49		14.63	50		14.26	94			14.33	37		14.1	65		13.32	47		14.17	46
14.48	63		14.5	152		14.24	127		14.16	87		14.02	83		14.88	125			14.64	48		14.45	99		14.11	64		14.78	46		14.7	51		14.47	99			14.53	33		14.22	64		13.56	48		14.38	44
14.75	68		14.56	155		14.36	133		14.36	85		14.28	81		15.08	123			14.91	47		14.67	104		14.38	75		15.23	50		14.78	53		14.73	103			14.74	37		14.5	68		13.72	47		14.64	47
14.95	72		14.76	155		14.59	129		14.56	88		14.45	90		15.23	141			15.07	54		14.93	102		14.37	73		15.27	51		15.12	52		14.84	92			14.95	35		14.75	68		13.96	50		14.81	45
15.13	70		15.1	160		14.73	146		14.82	89		14.63	90		15.44	134			15.29	49		15.19	106		14.73	78		15.52	48		15.17	56		15.2	104			15.16	37		14.77	72		14.22	51		14.99	42
15.32	74		15.3	178		15.01	148		15.02	96		14.88	91		15.66	137			15.4	54		15.36	107		14.95	78		15.77	60		15.4	57		15.41	99			15.38	40		15.13	66		14.35	51		15.19	44
15.64	72		15.3	176		15.2	139		15.24	97		15.04	91		15.77	147			15.73	53		15.51	115		15.18	76		15.79	57		15.63	54		15.4	106			15.52	37		15.23	73		14.63	55		15.38	49
15.88	76		15.77	182		15.35	151		15.35	94		15.3	99		16.05	151			15.85	52		15.68	113		15.18	77		16.27	54		15.81	57		15.6	103			15.74	42		15.4	76		14.81	51		15.66	46
16.01	77		15.58	183		15.6	155		15.57	96		15.51	104		16.28	148			16.07	54		15.96	113		15.51	86		16.5	53		15.99	58		15.81	108			15.96	42		15.62	78		15.04	56		15.74	43
16.17	73		16.09	195		15.72	157		15.83	103		15.72	103		16.5	152			16.31	51		15.94	121		15.92	84		16.66	62		16.39	53		16.03	109			16.1	40		15.85	74		15.2	55		16.01	48
16.31	83		16.27	199		16.02	168		15.94	106		15.88	110		16.61	161			16.55	56		16.26	123		15.75	87		16.85	61		16.61	61		16.24	114			16.33	44		15.97	76		15.41	55		16.14	42
16.48	81		16.29	203		16.17	174		16.18	110		16.12	109		16.9	166			16.63	58		16.39	115		16.03	80		17.05	64		16.72	62		16.42	106			16.51	44		16.27	77		15.6	54		16.44	51
16.72	78		16.49	208		16.31	175		16.51	107		16.33	111		17.1	165			16.94	58		16.57	124		16.2	86		17.22	62		17.04	61		16.46	111			16.7	39		16.45	84		15.84	58		16.57	46
17	81		16.99	209		16.57	174		16.55	110		16.49	116		17.31	167			17.13	60		16.85	129		16.55	94		17.4	61		17.24	59		16.83	124			16.9	39		16.61	79		16	55		16.76	55
17.1	81		17.1	231		16.65	183		16.81	114		16.78	118		17.44	169			17.33	57		17	122		16.89	99		17.72	63		17.35	65		17.01	124			17.1	42		16.74	82		16.27	57		17.02	51
17.35	79		17.31	231		16.95	186		16.95	117		16.99	119		17.68	184			17.66	55		17.17	135		16.7	95		17.88	64		17.52	62		17.48	125			17.27	45		17.05	88		16.42	56		17.24	50
17.55	86		17.52	236		17.18	189		17.11	121		17.24	118		17.88	193			17.83	60		17.5	136		17.16	92		18.04	67		17.79	68		17.57	122			17.55	44		17.24	89		16.62	59		17.43	54
17.81	85		17.66	241		17.26	200		17.37	120		17.4	120		18.11	183			18.07	62		17.49	131		17.29	102		18.11	65		17.98	66		17.78	127			17.7	43		17.39	88		16.76	65		17.56	53
17.94	84		17.92	247		17.5	198		17.56	131		17.66	124		18.29	196			18.29	59		17.65	138		17.38	98		18.27	68		18.01	67		17.85	122			17.85	43		17.65	90		16.96	65		17.7	53
18.09	88		18.22	254		17.74	205		17.83	134		17.87	132		18.52	197			18.44	62		17.99	132		17.81	100		18.49	72		18.28	65		18.2	130			18.1	44		17.76	90		17.17	61		18.05	55
18.31	92		18.49	261		17.95	216		18.02	126		17.98	123		18.76	211			18.64	59		18.13	152		18.04	103		18.77	71		18.55	71		18.38	129			18.28	44		18.1	93		17.48	66		18.23	52
18.42	89		18.67	277		18.11	217		18.13	136		18.22	130		18.9	207			18.81	59		18.42	142		18.13	97		18.92	65		18.64	68		18.49	134			18.49	53		18.26	89		17.52	66		18.39	54
18.66	90		18.73	281		18.31	218		18.52	141		18.34	126		19.1	225			19	67		18.48	155		18.37	109		19.23	72		19	73		18.7	129			18.73	50		18.49	95		17.76	68		18.53	53
19.05	90		18.86	267		18.51	227		18.64	138		18.6	137		19.31	220			19.18	67		18.83	155		18.64	116		19.25	74		19.07	75		18.83	134			18.9	50		18.74	93		18.02	64		18.81	57
19.07	95		19.06	289		18.68	230		18.9	141		18.78	134		19.45	222			19.35	67		18.95	161		18.49	104		19.4	71		19.27	65		19.12	141			19.09	52		18.81	96		18.1	69		19.05	57
19.22	92		19.51	284		18.92	239		19.02	142		19	137		19.68	228			19.64	66		19.25	165		18.76	109		19.63	73		19.46	76		19.24	135			19.29	50		19.05	100		18.38	73		19.16	56
19.46	98		19.36	298		19.07	238		19.31	155		19.14	138		19.95	233			19.8	67		19.35	156		19.38	107		19.81	74		19.69	73		19.38	138			19.52	50		19.27	103		18.49	70		19.42	57
19.73	101		19.66	308		19.35	246		19.53	150		19.38	138		20.13	239			20.02	66		19.67	171		19.42	120		19.92	73		19.8	75		19.58	145			19.73	54		19.4	105		18.7	76		19.6	57
19.92	98		19.91	322		19.58	247		19.69	158		19.56	146		20.25	240			20.15	67		19.86	165		19.53	113		20.15	78		20.08	79		19.84	145			19.99	53		19.66	104		18.94	71		19.76	61
20.09	97		20.04	318		19.74	251		19.82	149		19.71	146		20.49	244			20.32	73		20.13	166		19.82	114		20.42	78		20.24	78		20.17	142			20.17	52		19.85	104		19.13	69		20.04	63
20.35	104		20.33	330		19.88	258		20.08	157		19.9	151		20.67	247			20.52	74		20.32	174		19.67	120		20.68	71		20.35	78		20.44	156			20.44	50		19.93	113		19.36	69		20.2	63
20.37	100		20.52	334		20.11	261		20.25	164		20.09	152		20.92	251			20.58	72		20.41	183		20.11	118		20.92	81		20.7	82		20.48	150			20.65	57		20.31	109		19.52	80		20.48	62
20.76	100		20.62	336		20.35	261		20.5	155		20.2	147		21.09	250			20.92	74		20.68	180		20.56	127		21.02	81		20.85	82		20.81	150			20.81	54		20.46	112		19.63	75		20.61	66
20.9	107		20.76	348		20.5	264		20.67	160		20.52	149		21.29	267			21.05	73		20.83	182		20.87	118		21.16	79		20.83	75		20.85	160			20.97	58		20.61	110		19.9	71		20.82	59
21.1	104		20.96	358		20.83	263		20.83	169		20.68	159		21.54	273			21.27	72		21.03	197		20.82	125		21.49	89		21.27	82		20.95	156			21.17	59		20.87	105		20.19	78		21.09	63
21.34	104		21.14	376		21.03	280		21.05	169		20.83	153		21.7	275			21.47	75		21.27	185		20.74	125		21.69	81		21.38	84		21.27	159			21.42	56		21	119		20.35	78		21.17	64
21.36	116		21.34	366		21.17	281		21.25	175		21.03	159		21.92	278			21.63	71		21.52	195		21.03	133		21.89	88		21.82	90		21.51	158			21.62	57		21.27	119		20.54	81		21.42	66
21.75	112		21.6	381		21.35	291		21.34	175		21.23	154		22.14	280			21.89	78		21.67	193		21.42	128		21.88	88		21.83	86		21.6	163			21.77	59		21.45	130		20.79	80		21.64	68
21.95	117		21.77	386		21.65	302		21.56	177		21.34	165		22.31	283			22.06	80		21.81	205		21.34	124		22.34	86		22.04	85		22.1	161			21.98	60		21.71	121		21	78		21.87	67
22.11	118		22.09	388		21.87	299		21.81	179		21.67	164		22.49	289			22.29	77		22.06	203		21.63	132		22.6	90		22.17	89		21.94	172			22.2	64		21.88	121		21.16	86		22	64
22.2	113		22.23	409		22.02	309		21.96	177		21.82	167		22.76	292			22.47	77		22.38	213		21.95	143		22.58	90		22.71	92		22.12	168			22.31	64		22.13	133		21.34	89		22.16	66
22.38	116		22.45	409		22.16	306		22.23	184		22.06	170		22.93	302			22.65	82		22.57	212		22.16	146		22.89	92		22.47	90		22.41	173			22.6	65		22.26	133		21.58	88		22.42	69
22.76	119		22.67	413		22.31	323		22.38	185		22.31	174		23.13	312			22.88	79		22.62	213		22.36	150		23.22	95		23	88		22.85	174			22.75	63		22.4	132		21.81	86		22.53	72
22.99	116		22.8	419		22.62	318		22.59	197		22.51	170		23.34	312			23.04	85		22.84	212		22.44	145		23.45	99		23.07	91		22.96	181			23.02	69		22.65	125		21.98	89		22.77	72
23.18	123		22.93	430		22.96	334		22.77	191		22.71	181		23.48	317			23.27	86		23.13	217		22.92	146		23.54	97		23.38	92		22.95	172			23.11	66		22.86	130		22.16	88		23	72
23.31	124		23.31	439		23	320		22.98	193		22.91	170		23.81	315			23.48	84		23.34	225		23.17	150		23.78	102		23.45	93		23.29	180			23.33	65		23.07	139		22.47	95		23.23	74
23.63	129		23.31	434		23.24	332		23.23	198		23.14	180		24.02	330			23.7	80		23.52	241		23.2	145		24.06	90		23.66	97		23.54	178			23.57	68		23.18	140		22.6	92		23.38	69
23.63	126		23.72	457		23.5	340		23.38	198		23.29	178		24.28	332			23.95	82		23.74	240		23.42	154		24.19	98		23.7	96		23.7	181			23.76	69		23.48	142		22.8	93		23.5	72
23.88	134		23.78	461		23.66	339		23.63	199		23.57	182		24.43	331			24.03	90		24.01	243		23.63	151		24.21	100		24.04	100		23.77	182			23.94	73		23.67	144		23.02	92		23.77	75
24.19	133		23.99	460		23.92	339		23.74	204		23.7	182		24.64	340			24.35	88		24.27	235		23.9	158		24.6	103		24.38	98		23.9	191			24.12	69		23.92	142		23.17	98		23.92	73
24.35	131		24.22	481		23.99	358		23.96	217		23.92	195		24.8	339			24.49	91		24.45	248		24.17	158		24.87	99		24.56	101		24.26	197			24.31	73		24.13	147		23.34	97		24.15	76
24.44	138		24.59	485		24.17	356		24.2	221		24.21	190		24.95	357			24.73	86		24.66	241		24.28	168		24.98	101		24.73	106		24.59	186			24.5	75		24.24	151		23.6	99		24.37	71
24.68	132		24.55	497		24.46	363		24.38	209		24.35	188		25.18	366			24.99	92		24.82	262		24.51	162		25.05	105		24.82	102		24.63	186			24.7	70		24.46	151		23.76	102		24.6	75
25.07	144		24.92	504		24.68	361		24.55	213		24.56	197		25.43	361			25.06	95		25.02	262		24.51	171		25.27	108		25.17	100		24.79	199			24.91	71		24.67	158		24.04	102		24.71	78
25.15	147		24.91	505		24.85	377		24.77	220		24.69	197		25.59	375			25.35	97		25	262		24.56	172		25.65	106		25.25	105		24.88	198			25.2	75		24.91	161		24.19	96		24.98	78
25.28	142		25.02	515		24.95	372		24.97	224		24.97	201		25.74	371			25.56	95		25.16	257		24.63	172		25.85	111		25.65	107		25.22	196			25.27	74		25.1	157		24.37	114		25.15	76
25.51	141		25.51	530		25.2	389		25.13	222		25.1	198		25.97	377			25.74	96		25.47	267		25.28	170		25.87	111		25.83	112		25.38	202			25.56	80		25.18	161		24.59	106		25.36	77
25.92	144		25.53	537		25.33	388		25.4	227		25.29	205		26.12	377			25.97	98		25.67	268		25.31	175		26.15	110		26.05	107		25.7	203			25.77	77		25.49	163		24.81	109		25.6	79
26.06	157		25.99	531		25.63	399		25.53	239		25.45	204		26.3	386			26.19	93		25.89	277		25.52	175		26.32	112		26.17	113		25.56	212			25.94	81		25.64	167		24.93	106		25.82	83
26.43	149		25.99	543		25.7	403		25.79	243		25.71	209		26.53	393			26.37	98		26.08	279		25.74	181		26.52	115		26.35	113		26.08	213			26.1	82		25.83	168		25.17	107		26.02	79
26.44	150		26.26	574		25.92	397		25.95	234		25.94	208		26.73	392			26.61	100		26.44	290		26.07	177		26.76	113		26.56	111		26.12	220			26.28	85		25.99	179		25.31	111		26.2	83
26.59	148		26.35	571		26.17	406		26.08	239		26.07	218		26.91	403			26.76	108		26.51	287		26.26	181		26.95	112		26.74	120		26.27	217			26.53	87		26.21	174		25.56	110		26.42	83
26.85	155		26.62	576		26.32	421		26.35	243		26.23	213		27.11	402			26.96	113		26.66	302		26.53	187		27.19	117		27.11	118		26.56	226			26.76	86		26.45	173		25.81	108		26.56	82
27.06	148		26.94	584		26.49	403		26.62	241		26.48	212		27.34	406			27.14	111		26.78	311		26.59	185		27.52	113		27.19	117		26.85	222			26.92	85		26.59	174		25.99	122		26.84	88
27.32	162		26.98	594		26.81	429		26.71	247		26.73	219		27.47	422			27.31	112		26.98	285		26.78	182		27.5	122		27.35	119		26.96	221			27.19	88		26.86	181		26.24	115		27	86
27.35	162		27.25	600		26.91	423		26.99	244		26.89	222		27.7	422			27.65	109		27.12	314		27.01	191		27.72	122		27.52	119		27.37	226			27.35	88		27.04	190		26.35	117		27.16	90
27.55	161		27.52	602		27.11	438		27.17	247		27.11	222		27.9	424			27.85	113		27.38	301		27.24	193		28.02	125		27.79	121		27.63	232			27.55	86		27.23	189		26.59	116		27.45	91
27.86	158		27.82	612		27.45	440		27.39	254		27.3	225		28.09	435			28.02	118		27.65	311		27.18	191		28.12	125		27.98	127		27.79	232			27.79	84		27.43	192		26.75	120		27.66	89
28.1	164		28.02	620		27.56	446		27.61	253		27.48	229		28.22	432			28.27	115		27.74	322		27.55	194		28.2	123		28.13	114		28.02	236			27.95	87		27.68	197		27.02	120		27.8	91
28.09	174		28.22	630		27.8	450		27.86	254		27.7	242		28.49	439			28.36	106		27.98	324		27.75	210		28.6	131		28.42	122		28.05	237			28.16	93		27.82	186		27.22	120		28.02	92
28.34	169		28.35	646		28	458		27.97	268		28.04	238		28.63	446			28.63	118		28.27	319		27.77	207		28.82	127		28.41	122		28.29	248			28.41	92		28.06	202		27.37	121		28.18	91
28.52	166		28.59	641		28.17	453		28.2	264		28.22	237		28.91	452			28.81	115		28.4	334		27.77	209		28.98	128		28.75	120		28.49	242			28.56	97		28.17	201		27.56	126		28.45	94
28.77	167		28.68	648		28.43	459		28.43	272		28.45	239		29.09	452			28.98	116		28.63	332		28.2	205		29.11	138		29	127		28.7	247			28.81	100		28.38	202		27.74	129		28.63	97
29.02	165		28.95	675		28.56	472		28.59	261		28.67	248		29.27	470			29.15	122		28.8	344		28.68	214		29.32	128		29.02	127		28.77	249			28.98	105		28.67	207		28.02	133		28.88	95
29.09	177		29.23	674		28.79	480		28.91	276		28.75	252		29.5	474			29.41	122		29.02	343		28.7	216		29.38	131		29.34	135		29.07	254			29.12	104		28.82	206		28.12	130		29.07	96
29.3	173		29.41	678		28.91	483		29.02	280		29.07	236		29.61	463			29.63	122		29.23	350		28.74	223		29.72	134		29.43	131		29.23	264			29.38	106		29.07	208		28.34	135		29.27	94
29.48	168		29.47	686		29.27	490		29.24	285		29.24	243		29.91	484			29.81	125		29.54	350		29.05	223		29.91	142		29.65	137		29.7	256			29.52	109		29.22	211		28.54	135		29.47	95
29.79	186		29.52	685		29.41	485		29.57	279		29.38	242		30.1	479			29.94	127		29.62	364		29.35	229		30.13	141		29.79	133		29.77	251			29.75	107		29.35	217		28.72	140		29.63	99
29.87	178		29.91	705		29.55	505		29.75	288		29.56	259		30.27	488			30.24	121		29.87	357		29.65	226		30.38	132		30.17	140		29.89	271			29.95	103		29.62	220		28.95	136		29.87	98
30.23	178		30.02	711		29.89	494		29.94	294		29.72	254		30.49	496			30.37	129		30.07	377		29.62	228		30.53	143		30.24	135		30.06	264			30.19	108		29.84	219		29.15	137		30.02	95
30.27	182		30.29	719		30	502		30.16	296		29.99	262		30.66	503			30.64	131		30.34	375		29.87	229		30.75	138		30.35	135		30.3	273			30.35	108		29.99	230		29.41	139		30.21	99
30.38	181		30.61	718		30.21	516		30.32	300		30.12	260		30.87	508			30.71	133		30.51	385		30.12	230		31.06	133		30.68	144		30.66	273			30.6	108		30.24	221		29.5	143		30.48	97
30.89	188		30.71	734		30.34	516		30.51	296		30.37	257		31.14	507			31.02	135		30.62	392		30.1	235		31.01	146		30.93	144		30.85	277			30.71	114		30.5	225		29.75	147		30.63	106
30.75	188		30.9	744		30.64	521		30.64	310		30.52	266		31.35	516			31.13	131		30.7	392		30.88	235		31.44	147		31.1	143		31.02	273			30.93	112		30.67	227		29.95	151		30.77	105
31.14	191		31.1	749		30.85	530		30.87	303		30.75	264		31.53	520			31.44	139		30.98	398		30.87	238		31.4	154		31.17	143		30.92	286			31.14	119		30.81	231		30.21	147		31.01	99
31.38	200		31.27	761		31.02	525		31.1	305		30.88	262		31.77	528			31.53	137		31.24	399		31.08	245		31.7	148		31.28	149		31.2	287			31.38	117		30.99	243		30.38	153		31.24	104
31.33	195		31.38	757		31.12	534		31.3	304		31.07	274		31.95	533			31.75	142		31.49	403		30.87	246		32.06	155		31.69	148		31.54	286			31.61	118		31.28	244		30.56	149		31.35	109
31.59	196		31.56	782		31.41	538		31.42	310		31.38	273		32.2	534			31.9	145		31.56	415		31.06	257		32.23	149		31.75	147		31.61	294			31.72	120		31.46	240		30.75	154		31.6	112
32.06	202		31.92	768		31.42	556		31.7	323		31.56	268		32.38	547			32.18	140		31.84	413		31.9	260		32.2	156		31.98	156		31.77	298			31.97	123		31.59	253		30.98	154		31.85	109
32.11	202		32.05	783		31.83	556		31.84	314		31.72	281		32.55	542			32.35	147		32.1	421		31.93	253		32.56	158		32.14	155		31.97	299			32.17	126		31.81	255		31.24	147		32.05	109
32.17	199		32.16	795		31.9	554		32.02	317		31.84	282		32.81	548			32.56	142		32.27	422		32.09	265		32.63	160		32.55	162		32.23	294			32.29	132		32.03	253		31.38	165		32.27	104
32.45	206		32.38	796		32.2	557		32.22	323		32.07	274		32.95	556			32.74	153		32.43	421		32.44	261		32.72	158		32.67	159		32.42	298			32.6	131		32.23	252		31.67	158		32.43	114
32.67	217		32.53	805		32.37	566		32.34	327		32.24	291		33.17	566			32.89	157		32.6	422		32.24	278		33.09	159		33.19	150		32.63	299			32.71	128		32.48	260		31.79	153		32.56	112
32.88	210		32.64	815		32.6	561		32.56	324		32.44	286		33.4	556			33.13	153		32.67	427		32.74	265		33.34	161		32.99	159		32.74	303			32.97	138		32.61	262		31.99	159		32.81	111
33.13	213		32.9	806		32.78	582		32.78	330		32.67	288		33.59	577			33.22	148		32.92	437		32.42	267		33.45	171		33.45	164		32.97	314			33.1	135		32.88	262		32.2	169		33.02	114
33.17	206		33.21	845		32.95	584		32.92	322		32.92	293		33.74	568			33.57	146		33.21	453		33.2	270		33.7	167		33.49	160		33.22	307			33.32	142		32.99	266		32.42	169		33.28	114
33.49	222		33.42	828		33.24	578		33.13	328		33.11	301		33.92	574			33.71	160		33.35	445		33.27	275		33.94	166		33.81	166		33.45	310			33.56	141		33.27	272		32.67	161		33.4	112
33.57	211		33.55	835		33.36	603		33.31	339		33.28	290		34.17	583			34.01	163		33.56	451		33.54	278		33.97	170		33.97	169		33.63	328			33.7	142		33.48	285		32.82	174		33.57	113
33.91	221		33.76	844		33.63	599		33.52	343		33.54	297		34.31	602			34.14	164		33.99	462		33.47	280		34.38	166		34.31	169		33.8	328			33.91	144		33.61	284		33.01	175		33.77	124
33.82	222		33.99	864		34.01	592		33.7	344		33.81	300		34.45	583			34.31	160		34.1	469		33.84	286		34.42	169		34.2	169		33.91	326			34.12	150		33.85	276		33.2	167		34.01	112
34.14	223		34.27	857		34.02	594		33.93	348		33.86	296		34.7	592			34.49	162		34.28	472		34.04	284		34.77	170		34.79	173		34.24	340			34.28	153		34.07	280		33.43	165		34.22	120
34.27	226		34.33	876		34.21	597		34.17	346		34.07	309		35.01	593			34.71	164		34.5	468		34.14	295		34.94	176		34.68	173		34.43	335			34.49	160		34.33	285		33.63	179		34.34	119
34.75	231		34.61	880		34.48	623		34.38	343		34.29	302		35.2	600			34.9	174		34.6	473		34.6	300		35.17	174		34.97	178		34.71	331			34.68	156		34.56	300		33.81	176		34.61	122
34.84	235		34.9	882		34.63	612		34.63	345		34.52	323		35.45	619			35.07	167		34.88	479		34.71	292		35.23	176		35.38	182		34.76	344			34.96	157		34.76	293		34.02	182		34.75	118
35.07	226		34.97	901		34.87	626		34.73	359		34.68	310		35.59	615			35.31	175		35.06	477		34.77	292		35.52	175		35.33	183		34.99	352			35.12	157		34.86	297		34.17	176		35.03	121
35.07	241		35.38	885		35.06	615		34.95	348		34.88	313		35.8	620			35.56	178		35.34	487		34.89	291		35.75	179		35.59	184		35.34	331			35.38	164		35.1	293		34.38	175		35.19	119
35.53	241		35.42	907		35.19	626		35.17	369		35.08	320		35.99	622			35.74	173		35.41	491		35.15	294		35.89	177		35.85	184		35.45	352			35.51	161		35.22	302		34.54	185		35.45	127
35.45	243		35.5	913		35.42	633		35.38	366		35.3	326		36.14	625			35.84	179		35.76	498		35.3	300		36.16	177		35.77	182		35.55	344			35.73	160		35.53	307		34.84	181		35.59	128
35.99	234		35.84	910		35.6	631		35.52	360		35.51	333		36.3	629			36.1	185		35.94	490		35.45	304		36.22	179		36.14	189		35.88	344			35.95	170		35.67	302		34.97	189		35.88	126
36.06	244		35.96	934		35.81	646		35.74	368		35.8	321		36.62	631			36.22	175		36.18	503		36.04	306		36.57	187		36.14	188		36.22	353			36.16	168		35.86	310		35.2	182		36.06	126
36.22	252		36.29	926		36.1	642		35.99	378		35.9	323		36.8	627			36.49	186		36.35	506		36.04	303		36.84	190		36.64	186		36.37	354			36.35	171		36.09	307		35.48	190		36.27	126
36.51	257		36.37	927		36.2	626		36.12	367		36.2	337		37.05	648			36.77	184		36.49	505		36.27	311		36.91	192		36.73	195		36.51	349			36.42	183		36.24	314		35.61	182		36.45	130
36.71	263		36.67	946		36.41	649		36.38	377		36.29	332		37.24	642			36.9	188		36.71	510		36.44	315		37.19	189		36.95	198		36.67	355			36.8	178		36.41	315		35.8	191		36.7	126
36.79	266		36.81	952		36.63	642		36.55	374		36.44	330		37.36	646			37.08	181		36.88	525		36.62	311		37.52	189		37.14	197		36.99	365			36.95	177		36.62	310		36.01	184		36.82	127
37.1	268		37.08	953		36.77	661		36.77	384		36.65	328		37.55	641			37.32	185		37.17	525		36.77	314		37.59	197		37.35	204		37.07	369			37.12	179		36.9	314		36.2	187		37.08	132
37.27	257		37.27	957		36.98	645		37	381		36.86	331		37.7	658			37.64	181		37.4	519		36.88	318		37.85	191		37.54	204		37.19	361			37.33	185		36.97	321		36.39	192		37.23	137
37.43	271		37.34	960		37.12	651		37.19	381		37.07	338		37.97	656			37.89	199		37.52	522		37.05	327		37.97	187		37.81	205		37.4	367			37.52	191		37.27	326		36.6	188		37.48	133
37.63	266		37.71	955		37.28	664		37.4	387		37.31	353		38.06	659			38.06	191		37.69	532		37.24	318		38.44	198		37.93	208		37.7	367			37.76	184		37.47	339		36.84	199		37.6	133
37.77	269		37.82	973		37.54	662		37.64	381		37.55	354		38.26	663			38.28	204		37.9	514		37.38	326		38.31	205		38.16	201		38.02	358			37.88	187		37.63	328		36.95	200		37.9	132
37.95	281		37.92	981		37.63	672		37.87	400		37.75	347		38.45	660			38.49	204		38.06	528		37.77	325		38.53	202		38.25	200		38.1	387			38.17	192		37.85	333		37.21	201		38.02	138
38.26	288		38.35	987		37.93	671		38	393		37.97	348		38.73	672			38.68	205		38.16	531		37.63	325		38.85	201		38.51	215		38.32	376			38.38	197		37.99	324		37.41	196		38.23	137
38.44	292		38.49	996		38.13	671		38.2	397		38.09	351		38.91	673			38.86	204		38.44	519		37.71	322		39.09	202		38.59	222		38.27	378			38.52	204		38.23	334		37.57	197		38.46	138
38.56	287		38.8	993		38.28	674		38.35	398		38.25	363		39.1	674			39.03	205		38.59	540		38.37	329		39.04	194		38.87	215		38.49	382			38.77	195		38.44	340		37.7	207		38.63	135
38.89	291		38.84	986		38.54	685		38.56	394		38.49	350		39.3	672			39.25	211		38.86	546		38.67	335		39.23	201		39.03	215		38.82	376			38.94	202		38.65	346		37.97	206		38.8	136
39.17	310		39.13	994		38.66	677		38.74	409		38.63	359		39.52	685			39.48	204		39.16	544		38.73	330		39.56	201		39.32	219		38.96	381			39.27	197		38.8	344		38.22	203		39.06	141
39.13	302		39.45	1004		38.93	680		38.99	407		38.94	355		39.73	678			39.61	211		39.15	542		38.92	334		39.87	195		39.56	221		39.11	383			39.43	207		39.02	341		38.38	211		39.25	146
39.32	307		39.56	1004		39.06	684		39.13	408		39.17	360		39.82	688			39.87	215		39.49	535		38.96	327		40.1	211		39.63	227		39.31	379			39.55	208		39.22	340		38.52	201		39.43	151
39.6	311		39.65	1015		39.36	682		39.32	409		39.41	362		40.13	699			40.06	218		39.65	541		39.35	335		40.13	207		39.84	218		39.7	379			39.74	213		39.43	354		38.77	209		39.6	140
40.02	309		39.95	1005		39.51	699		39.61	405		39.59	378		40.29	689			40.17	212		39.88	558		39.63	329		40.35	205		40.08	212		39.85	389			39.91	211		39.66	357		38.95	204		39.8	140
40	318		40.16	1011		39.74	697		39.72	407		39.77	380		40.6	694			40.39	213		39.99	558		39.41	335		40.7	210		40.25	229		39.99	385			40.13	214		39.86	357		39.22	212		40.06	151
40.36	327		40.23	1015		39.91	687		40.01	405		39.95	377		40.7	692			40.54	218		40.1	547		39.82	339		40.84	210		40.6	223		40.3	384			40.44	216		39.99	352		39.38	213		40.22	139
40.41	316		40.56	1020		40.17	681		40.11	415		40.16	380		40.84	691			40.75	222		40.45	559		40.2	342		40.67	211		40.84	226		40.44	391			40.52	227		40.23	352		39.59	219		40.41	142
40.79	337		40.7	1025		40.25	694		40.38	420		40.43	385		41.09	707			40.97	218		40.56	553		40.35	346		41.15	211		40.86	223		40.74	383			40.72	222		40.45	345		39.79	217		40.6	151
40.82	337		40.89	1032		40.58	695		40.7	420		40.63	382		41.35	697			41.13	223		40.79	557		40.6	342		41.35	215		41.06	238		40.9	393			40.88	229		40.6	357		39.98	218		40.77	148
41.3	343		41.06	1034		40.8	689		40.86	425		40.77	388		41.56	706			41.31	222		40.99	558		40.56	340		41.59	214		41.3	235		40.92	393			41.1	218		40.9	351		40.25	210		40.99	144
41.31	350		41.25	1034		41.04	696		41.06	421		40.96	396		41.74	712			41.49	233		41.09	553		41.09	352		41.58	213		41.58	233		41.25	402			41.33	223		41.09	355		40.39	224		41.18	148
41.53	354		41.31	1025		41.16	695		41.18	434		41.15	393		41.95	707			41.75	229		41.47	555		40.95	345		41.97	212		41.73	236		41.51	382			41.53	229		41.25	357		40.53	215		41.35	144
41.73	353		41.59	1032		41.42	697		41.49	437		41.33	398		42.11	707			41.95	223		41.59	544		41.23	348		42.19	216		42	242		41.59	395			41.69	238		41.4	363		40.77	221		41.59	154
41.92	348		41.9	1034		41.53	706		41.64	427		41.56	396		42.31	709			42.12	235		41.74	551		41.4	339		42.35	210		42.13	243		41.85	387			41.96	233		41.68	370		40.99	223		41.81	150
42.24	366		42.04	1030		41.76	711		41.85	441		41.76	404		42.56	696			42.3	231		41.87	552		41.8	341		42.41	218		42.28	237		41.96	398			42.07	234		41.85	363		41.16	225		41.95	154
42.26	371		42.18	1031		42.04	708		42.07	440		41.95	407		42.76	711			42.49	225		42.23	552		41.87	344		42.67	217		42.4	249		42.26	392			42.31	240		41.98	368		41.44	227		42.21	150
42.69	368		42.4	1027		42.13	704		42.21	435		42.12	411		42.9	711			42.69	231		42.49	556		42.23	352		43.03	213		42.83	245		42.45	398			42.43	242		42.21	360		41.56	227		42.4	148
42.9	368		42.57	1038		42.36	702		42.35	438		42.31	411		43.17	714			43	234		42.71	554		42.35	345		43.01	224		43.05	248		42.54	386			42.69	233		42.38	367		41.8	225		42.57	145
42.78	385		42.85	1035		42.52	720		42.63	438		42.47	417		43.37	719			43.12	242		42.77	540		42.54	347		43.29	223		43.12	252		42.77	393			42.85	240		42.66	361		41.98	217		42.78	148
43.1	389		42.97	1024		42.84	707		42.86	445		42.71	425		43.46	716			43.3	238		42.93	552		42.67	343		43.45	226		43.36	253		42.98	402			43.07	249		42.86	356		42.2	214		43.01	148
43.25	392		43.17	1033		42.92	721		43.02	450		42.88	412		43.7	710			43.59	234		43.31	542		42.88	339		43.74	220		43.51	260		43.12	393			43.23	245		43.03	363		42.43	220		43.17	150
43.42	397		43.44	1032		43.1	700		43.29	439		43.08	407		43.96	718			43.82	241		43.53	550		43.44	337		43.85	219		43.67	245		43.58	398			43.47	246		43.27	369		42.54	225		43.37	155
43.53	390		43.63	1048		43.37	719		43.36	441		43.27	423		44.13	722			43.99	251		43.56	535		43.56	348		44.03	218		43.87	254		43.58	390			43.73	246		43.43	363		42.81	220		43.65	152
43.89	398		43.8	1033		43.53	713		43.59	444		43.46	430		44.34	720			44.17	247		43.81	531		44.02	345		44.36	214		44.2	243		43.89	391			43.81	240		43.63	359		43	221		43.8	149
44.1	412		44.07	1034		43.76	707		43.87	444		43.63	422		44.5	720			44.34	242		44.19	541		44.07	334		44.51	221		44.38	254		44.14	389			44.04	247		43.85	354		43.24	225		43.99	153
44.27	407		44.24	1030		43.92	703		44.02	445		43.85	430		44.78	726			44.56	242		44.45	524		44.11	325		44.77	219		44.38	256		44.35	387			44.36	252		44.07	359		43.44	227		44.29	150
44.57	417		44.42	1020		44.16	724		44.23	443		44.06	433		44.88	730			44.67	242		44.6	528		44.6	339		44.89	220		44.74	249		44.46	381			44.45	253		44.26	358		43.61	222		44.38	148
44.84	420		44.6	1030		44.41	705		44.33	447		44.26	436		45.13	728			44.85	242		44.87	526		44.58	339		45.02	221		44.85	258		44.69	382			44.67	251		44.4	356		43.81	218		44.56	150
44.67	424		44.77	1034		44.67	710		44.6	452		44.4	440		45.32	715			45.11	251		45.06	516		44.88	330		45.15	220		45.15	253		44.89	385			44.86	260		44.67	355		43.99	228		44.82	153
45.17	427		44.95	1012		44.91	708		44.74	443		44.67	446		45.45	717			45.32	252		45.21	520		44.87	336		45.47	220		45.39	258		45.08	383			45.1	255		44.81	349		44.21	220		44.97	147
45.35	433		45.23	1016		45.06	715		44.97	459		44.82	446		45.76	731			45.45	252		45.38	520		45.11	326		45.65	221		45.48	244		45.26	394			45.26	254		45.06	363		44.46	221		45.21	149
45.45	429		45.47	1024		45.31	705		45.09	449		45.06	447		45.98	716			45.77	253		45.52	517		45.37	316		46.04	216		45.55	257		45.5	381			45.48	259		45.27	347		44.67	220		45.39	146
45.6	443		45.49	1008		45.54	699		45.28	444		45.21	439		46.25	715			45.96	252		45.71	503		45.52	326		46.28	218		45.98	253		45.67	377			45.71	255		45.42	350		44.85	212		45.64	149
45.91	440		45.88	1007		45.69	710		45.52	452		45.47	463		46.49	716			46.18	252		45.91	504		45.48	323		46.4	220		46.06	250		45.81	376			45.95	251		45.63	337		44.97	219		45.84	145
45.94	458		45.93	1008		45.85	704		45.74	450		45.69	453		46.7	703			46.39	246		46.08	502		45.77	324		46.59	215		46.35	262		46.06	376			46.2	263		45.81	337		45.11	224		46.06	152
46.4	457		46.2	1015		45.99	698		46.03	453		45.93	456		46.84	708			46.57	253		46.3	488		46.13	320		46.91	220		46.39	252		46.26	373			46.35	258		46.06	328		45.43	218		46.18	148
46.6	447		46.47	991		46.27	699		46.16	455		46.16	455		47.06	702			46.78	246		46.45	502		46.16	316		47.04	216		46.87	256		46.55	375			46.55	255		46.28	343		45.6	212		46.42	147
46.79	468		46.48	990		46.42	690		46.35	457		46.4	457		47.21	705			46.99	248		46.67	491		46.35	319		47.26	216		46.94	254		46.56	366			46.74	260		46.43	326		45.85	214		46.6	151
46.94	464		46.79	992		46.52	684		46.54	454		46.59	446		47.42	714			47.16	248		46.87	476		46.4	309		47.36	210		47.06	249		46.81	352			46.95	252		46.67	330		46.01	211		46.88	147
47.35	470		46.94	988		46.89	700		46.72	447		46.72	456		47.6	704			47.31	249		46.97	467		46.91	313		47.57	219		47.38	250		47.06	360			47.11	253		46.86	323		46.2	215		47.01	149
47.31	466		47.17	988		46.94	678		46.91	451		46.92	479		47.89	694			47.66	249		47.23	461		46.77	291		47.81	214		47.68	246		47.27	354			47.27	245		47.04	323		46.5	211		47.17	146
47.57	456		47.49	970		47.2	675		47.13	446		47.09	469		48.02	692			47.75	242		47.48	468		47.11	291		48.19	217		47.85	246		47.41	362			47.45	255		47.18	327		46.6	200		47.35	141
47.6	462		47.62	964		47.38	664		47.28	442		47.28	462		48.16	693			48.07	251		47.63	456		47.02	295		48.06	204		47.97	246		47.62	344			47.68	246		47.43	321		46.79	206		47.56	140
48.1	480		47.74	967		47.57	662		47.54	456		47.52	451		48.37	681			48.26	241		47.75	453		47.42	296		48.22	202		48.28	246		47.88	344			47.89	239		47.63	317		47.09	206		47.72	137
48.11	466		47.89	967		47.75	666		47.68	445		47.73	457		48.5	664			48.45	240		48.1	448		47.7	290		48.41	211		48.46	247		48.02	334			48.11	247		47.81	304		47.24	198		47.99	149
48.27	467		48.18	955		48.05	659		47.87	445		47.95	461		48.76	655			48.66	234		48.33	436		47.77	284		48.75	201		48.56	248		48.21	344			48.28	239		47.99	304		47.41	198		48.13	140
48.74	465		48.39	947		48.2	641		48.13	437		48.2	457		48.98	658			48.88	235		48.36	431		47.82	278		49.16	209		48.73	243		48.37	341			48.49	242		48.16	301		47.6	199		48.42	141
48.69	468		48.59	931		48.43	636		48.34	448		48.33	459		49.17	667			49.05	228		48.49	418		48.12	277		49.31	197		48.95	238		48.66	335			48.75	232		48.41	292		47.84	191		48.59	131
48.83	474		48.85	936		48.56	630		48.53	452		48.5	451		49.32	652			49.29	225		48.7	420		48.31	273		49.43	197		49.15	234		48.9	322			48.92	239		48.58	283		47.96	192		48.81	137
49.31	474		49.03	908		48.68	633		48.81	437		48.73	456		49.52	635			49.43	220		48.97	415		48.54	267		49.62	198		49.29	237		48.91	323			49.1	233		48.82	280		48.14	200		48.99	139
49.45	469		49.3	905		48.95	626		49.08	442		49	454		49.7	636			49.59	219		49.06	407		48.56	273		49.74	192		49.52	232		49.23	321			49.27	221		49.02	278		48.34	183		49.25	137
49.48	464		49.54	898		49.13	624		49.24	441		49.08	453		49.95	629			49.77	227		49.36	392		48.98	255		49.99	192		49.88	232		49.2	308			49.52	229		49.24	279		48.56	177		49.43	131
49.7	462		49.75	878		49.38	616		49.45	426		49.4	446		50.13	633			49.95	209		49.56	383		49.08	262		50.17	191		50.02	228		49.47	316			49.67	224		49.48	267		48.78	180		49.6	126
49.97	455		49.92	875		49.49	604		49.63	435		49.56	443		50.31	601			50.24	202		49.72	376		49.47	250		50.33	193		50.04	223		49.67	293			49.8	219		49.67	253		49	172		49.8	128
50.19	448		50.14	848		49.67	604		49.89	435		49.74	445		50.47	614			50.36	210		49.92	378		49.77	242		50.64	179		50.34	221		49.88	293			50.06	223		49.85	263		49.13	173		50.01	126
50.37	447		50.29	847		49.88	591		50.02	433		49.9	437		50.68	599			50.56	198		50.14	360		50.09	256		50.6	180		50.53	223		50.19	284			50.28	215		50.06	254		49.38	177		50.17	122
50.29	444		50.58	844		50.06	574		50.24	418		50.09	436		50.85	580			50.71	198		50.44	349		49.92	258		50.84	184		50.82	228		50.39	278			50.39	209		50.13	248		49.56	172		50.35	124
50.79	444		50.73	809		50.33	575		50.41	409		50.42	435		51.06	581			50.91	195		50.54	348		50.36	238		51.09	182		50.95	211		50.56	284			50.66	201		50.42	233		49.77	163		50.59	128
50.86	425		50.94	806		50.45	567		50.59	423		50.59	435		51.26	563			51.09	191		50.84	349		50.67	234		51.31	173		51.08	202		50.92	279			50.81	203		50.54	235		49.94	162		50.68	123
51.03	427		51.12	793		50.73	554		50.77	410		50.81	426		51.49	560			51.34	186		50.92	328		50.75	230		51.51	177		51.24	205		50.95	267			51	193		50.77	229		50.21	163		50.91	121
51.2	422		51.31	772		50.85	533		51.03	403		50.93	420		51.69	540			51.51	175		51.31	307		50.85	230		51.77	168		51.59	200		51.12	259			51.27	196		50.92	227		50.31	159		51.13	117
51.56	429		51.42	752		51.06	528		51.26	402		51.1	410		51.84	550			51.79	175		51.35	315		50.95	225		51.85	172		51.66	188		51.36	253			51.46	182		51.2	215		50.56	148		51.36	112
51.47	425		51.6	746		51.29	531		51.4	388		51.35	403		52.05	512			51.92	176		51.56	301		51.31	217		51.94	165		51.86	191		51.52	262			51.73	188		51.4	207		50.73	142		51.49	114
51.81	418		51.81	721		51.44	522		51.74	380		51.56	409		52.26	510			52.14	162		51.91	300		51.53	214		52.06	169		52.01	188		51.7	242			51.85	181		51.59	212		50.93	148		51.71	107
52.1	415		51.98	720		51.71	506		51.84	381		51.81	394		52.49	501			52.29	154		52.09	303		51.92	214		52.38	157		52.24	184		51.92	238			52.11	172		51.76	204		51.18	138		51.96	108
52.34	396		52.29	692		52.01	496		52.02	367		51.94	392		52.62	503			52.56	152		52.17	284		52.17	205		52.63	152		52.41	181		52.13	229			52.33	168		52.01	193		51.36	134		52.24	106
52.45	396		52.29	663		52.06	483		52.24	373		52.14	383		52.91	486			52.66	143		52.38	270		52.01	201		52.92	165		52.67	175		52.23	234			52.45	164		52.19	191		51.52	139		52.35	105
52.51	382		52.63	650		52.31	479		52.41	363		52.36	378		53.06	476			52.94	141		52.54	258		52.59	199		53.2	159		52.86	172		52.56	231			52.73	167		52.38	187		51.77	133		52.56	101
52.75	375		52.77	652		52.54	461		52.64	353		52.53	378		53.28	468			53.1	138		52.82	247		52.53	193		53.15	156		53.14	171		52.64	214			52.87	151		52.59	191		51.99	126		52.78	103
53.03	366		53.06	622		52.78	456		52.81	353		52.74	365		53.49	449			53.26	143		53.04	255		53.13	194		53.6	148		53.29	163		52.91	217			53.06	159		52.8	180		52.13	125		52.96	98
53.33	360		53.15	608		52.99	438		52.98	345		52.89	356		53.67	431			53.54	138		53.24	240		53.13	186		53.67	142		53.41	170		53.19	206			53.28	143		52.99	166		52.38	123		53.17	96
53.43	354		53.38	580		53.24	434		53.11	341		53.17	348		53.82	419			53.67	123		53.41	235		53.37	174		54.1	139		53.64	156		53.35	199			53.48	139		53.22	161		52.59	116		53.39	91
53.57	341		53.41	573		53.33	421		53.36	330		53.28	343		54.02	410			53.99	126		53.64	221		53.35	180		54.1	134		53.94	160		53.52	193			53.69	137		53.38	164		52.77	113		53.54	86
54	336		53.79	555		53.54	412		53.54	326		53.52	340		54.24	393			54.13	124		53.82	223		53.74	169		54.3	139		54.06	150		53.85	195			53.85	132		53.54	152		52.93	113		53.78	88
54.11	335		53.83	549		53.81	400		53.77	308		53.67	333		54.46	398			54.33	120		54.02	213		53.99	165		54.55	140		54.29	145		54.02	178			54.06	133		53.77	146		53.22	111		53.96	87
54.24	332		54.22	518		53.92	385		53.96	310		53.85	331		54.7	376			54.55	108		54.35	204		53.7	160		54.68	134		54.47	148		54.3	176			54.27	127		54.02	142		53.39	112		54.2	81
54.42	322		54.4	498		54.2	372		54.05	306		54.07	298		54.93	365			54.74	111		54.63	205		54.17	153		55.08	137		54.75	138		54.51	167			54.45	122		54.17	142		53.61	110		54.35	83
54.63	299		54.53	485		54.38	360		54.27	296		54.24	296		55.1	352			54.96	104		54.6	195		54.42	156		55.24	128		54.83	141		54.6	162			54.63	120		54.42	131		53.77	105		54.6	76
54.85	295		54.75	461		54.57	341		54.51	290		54.5	293		55.26	337			55.13	103		54.81	187		54.6	151		55.36	131		55.13	135		54.82	162			54.88	113		54.52	121		53.99	101		54.73	78
55.06	292		54.94	452		54.83	342		54.7	291		54.66	271		55.49	327			55.33	97		55.13	179		54.83	145		55.48	121		55.31	122		55.1	163			54.99	107		54.79	118		54.2	93		54.98	76
55.34	278		55.2	430		54.96	335		54.95	266		54.82	275		55.63	323			55.55	99		55.31	169		55.36	138		55.67	121		55.46	126		55.21	157			55.24	107		54.92	117		54.35	94		55.2	74
55.57	273		55.26	413		55.1	330		55.11	270		55.08	275		55.92	302			55.71	101		55.44	164		54.91	135		55.9	123		55.74	124		55.5	147			55.52	104		55.15	111		54.63	90		55.33	72
55.54	259		55.56	396		55.49	313		55.34	261		55.33	257		56.13	302			55.9	90		55.74	160		55.38	135		56.2	116		55.81	121		55.66	151			55.63	99		55.38	111		54.73	84		55.59	68
55.97	258		55.66	378		55.64	299		55.5	255		55.45	260		56.32	280			56.1	88		55.88	154		55.74	129		56.32	119		56.24	118		55.92	144			55.85	92		55.56	102		54.95	84		55.76	65
56.15	240		55.92	365		55.81	288		55.74	241		55.67	239		56.45	275			56.3	90		56.05	148		55.83	127		56.43	107		56.24	120		55.98	134			56.05	91		55.77	103		55.15	86		56.02	64
56.33	239		56.07	354		56.05	275		55.92	242		55.83	237		56.67	262			56.45	86		56.27	143		55.93	124		56.74	106		56.49	114		56.26	129			56.26	96		55.95	97		55.38	77		56.1	62
56.52	225		56.34	327		56.3	270		56.13	231		55.99	230		56.89	260			56.74	82		56.58	137		56.17	122		56.89	106		56.6	114		56.46	122			56.38	84		56.19	93		55.5	76		56.35	66
56.88	223		56.54	309		56.44	252		56.34	229		56.26	227		57.06	257			56.92	87		56.56	133		56.18	117		57.05	108		56.87	106		56.62	122			56.66	84		56.36	89		55.77	75		56.58	61
57.04	213		56.7	306		56.58	254		56.56	223		56.49	214		57.35	229			57.14	82		56.82	127		56.15	118		57.18	105		57.02	111		56.77	123			56.82	82		56.58	89		55.95	70		56.78	64
57.35	196		57.04	282		56.78	237		56.76	204		56.62	213		57.6	228			57.28	77		57.02	126		56.71	108		57.46	102		57.24	107		56.98	117			57.06	77		56.77	84		56.17	66		56.96	57
57.33	184		57.06	268		56.9	225		56.92	208		56.86	204		57.72	216			57.59	83		57.22	121		56.95	110		57.63	97		57.54	95		57.23	118			57.22	71		57.02	85		56.41	68		57.17	54
57.35	183		57.3	260		57.14	222		57.05	198		57.06	191		57.9	198			57.81	74		57.28	114		56.81	110		57.85	102		57.56	101		57.41	113			57.46	68		57.16	78		56.54	66		57.33	53
57.81	174		57.52	245		57.35	206		57.23	191		57.2	183		58.2	192			58	74		57.6	116		57.15	102		58.02	105		58.02	92		57.49	105			57.61	69		57.38	69		56.74	62		57.52	51
58.02	166		57.78	243		57.53	205		57.54	187		57.43	174		58.34	192			58.16	75		57.63	106		57.44	105		58.23	93		58.16	96		57.85	109			57.81	65		57.58	66		57	61		57.72	52
58.1	165		57.9	222		57.77	189		57.71	178		57.61	169		58.56	181			58.34	78		57.95	97		57.54	105		58.63	94		58.49	98		57.82	99			58.12	61		57.81	70		57.13	61		57.9	48
58.3	160		58.12	206		57.92	184		58.02	171		57.79	163		58.74	176			58.63	74		58.2	98		57.98	104		58.77	93		58.69	94		58.1	99			58.18	61		58.02	63		57.31	59		58.14	49
58.53	150		58.36	195		58.1	170		58.04	167		58	156		58.92	176			58.76	76		58.2	98		58.07	92		59.08	92		58.71	88		58.46	104			58.4	55		58.24	66		57.56	55		58.3	53
58.62	142		58.6	193		58.38	165		58.3	155		58.24	162		59.16	159			58.99	68		58.46	98		58.45	100		59.13	92		59.03	83		58.45	98			58.69	60		58.38	61		57.74	54		58.54	47
58.79	133		58.71	182		58.44	159		58.45	154		58.4	144		59.28	147			59.13	70		58.67	93		58.41	94		59.33	92		59.2	87		58.64	96			58.8	56		58.61	60		57.94	51		58.74	50
59.15	131		59.02	172		58.67	152		58.72	153		58.64	143		59.51	144			59.42	70		58.94	94		58.67	90		59.56	91		59.33	91		58.9	93			59.11	53		58.76	53		58.18	51		58.92	49
59.47	131		59.15	162		58.89	149		58.87	149		58.87	138		59.73	149			59.54	73		59.06	92		59.03	89		59.85	90		59.47	88		59.17	91			59.2	57		58.98	56		58.4	49		59.17	47
59.45	119		59.35	154		59.07	141		59.03	132		59.06	133		59.94	129			59.85	66		59.35	92		58.87	91		60.06	94		59.8	82		59.28	97			59.43	52		59.18	51		58.56	49		59.31	46
59.73	113		59.65	143		59.27	137		59.33	129		59.25	125		60.11	134			59.94	71		59.49	89		59.59	84		60.12	88		59.93	86		59.59	93			59.64	51		59.36	51		58.79	49		59.57	47
59.95	115		59.92	136		59.51	124		59.49	137		59.45	120		60.29	123			60.14	67		59.81	84		59.46	88		60.39	88		60.13	79		59.64	97			59.85	47		59.63	50		58.95	45		59.7	42
60.03	105		60.03	132		59.72	120		59.7	124		59.7	115		60.47	122			60.34	68		59.91	86		59.49	90		60.57	88		60.35	83		59.93	91			60.06	47		59.75	49		59.11	48		59.93	39
60.19	103		60.26	126		59.91	122		59.88	125		59.91	114		60.68	108			60.53	68		60.11	84		59.82	80		60.73	85		60.45	79		59.99	90			60.22	45		59.98	44		59.36	49		60.2	43
60.47	103		60.5	116		60.09	115		60.1	111		60.04	107		60.83	114			60.73	68		60.44	83		60.11	84		60.87	87		60.58	78		60.39	86			60.45	42		60.16	49		59.56	42		60.35	40
60.55	92		60.67	111		60.27	113		60.27	112		60.24	102		61.12	102			60.93	67		60.61	81		60.17	82		61.24	86		60.88	76		60.38	91			60.66	45		60.35	46		59.81	42		60.53	37
60.83	90		60.76	107		60.44	106		60.49	114		60.48	104		61.22	103			61.1	71		60.73	81		60.52	86		61.3	80		61.12	81		60.87	85			60.84	46		60.57	47		59.94	41		60.85	36
61.02	91		60.99	108		60.67	104		60.71	106		60.7	97		61.51	102			61.3	72		60.98	82		60.44	79		61.67	84		61.34	77		60.84	84			61.04	42		60.79	44		60.1	43		60.96	43
61.34	89		61.14	99		60.85	96		60.92	103		60.86	91		61.67	90			61.43	71		61.18	78		61.02	80		61.72	84		61.46	82		61.02	83			61.23	44		61.02	40		60.35	39		61.2	42
61.53	84		61.51	98		61.1	92		61.12	98		61.02	94		61.83	96			61.67	66		61.39	80		60.92	76		61.86	82		61.62	83		61.31	83			61.34	44		61.15	43		60.52	39		61.31	37
61.64	83		61.49	92		61.3	95		61.31	95		61.27	92		62.02	87			61.88	67		61.46	81		61.32	78		61.99	86		61.94	76		61.49	86			61.65	41		61.37	41		60.76	39		61.53	37
61.91	82		61.88	93		61.52	90		61.49	96		61.62	84		62.22	90			62.03	66		61.72	76		61.42	76		62.35	81		62.03	70		61.74	85			61.75	41		61.57	44		60.97	36		61.67	38
62.19	84		62	88		61.62	86		61.69	89		61.75	82		62.47	84			62.22	69		62.02	80		61.67	77		62.21	81		62.17	81		61.86	83			62.03	41		61.81	38		61.22	41		61.9	37
62.37	71		62.24	85		61.85	87		61.91	86		61.95	84		62.6	88			62.49	69		62.19	78		61.6	78		62.72	77		62.4	79		62.04	86			62.23	39		61.93	39		61.35	39		62.2	36
62.33	74		62.27	82		62.08	84		62.09	84		62.2	77		62.76	84			62.66	69		62.27	81		61.91	80		62.82	76		62.52	79		62.43	82			62.42	38		62.2	38		61.53	41		62.39	35
62.54	75		62.62	82		62.33	80		62.3	82		62.38	78		63.06	79			62.87	66		62.53	79		62.45	79		63.06	77		62.77	81		62.48	78			62.62	43		62.31	34		61.64	36		62.58	34
62.95	72		62.69	76		62.45	79		62.5	84		62.54	80		63.27	79			63.06	67		62.77	79		62.23	77		63.24	77		63.06	75		62.7	81			62.81	37		62.61	41		61.95	37		62.77	36
63.01	70		63.01	76		62.74	80		62.84	81		62.7	75		63.42	80			63.21	71		62.91	78		63.03	76		63.4	78		63.17	72		62.87	81			62.98	38		62.74	38		62.11	37		62.96	33
63.33	68		63.19	81		62.88	73		63.03	80		62.96	73		63.6	75			63.42	71		63.09	76		62.81	79		63.55	80		63.39	73		63.08	77			63.19	41		62.96	36		62.35	39		63.06	33
63.45	67		63.29	73		63.05	77		63.2	73		63.13	71		63.85	76			63.64	68		63.27	76		62.9	72		63.76	77		63.62	75		63.39	82			63.42	42		63.19	36		62.53	35		63.27	36
63.53	66		63.48	68		63.24	71		63.35	74		63.25	73		63.98	85			63.85	72		63.61	80		63.24	78		64.11	77		63.79	79		63.43	83			63.67	38		63.33	35		62.77	32		63.51	35
63.93	72		63.71	71		63.52	68		63.56	78		63.49	73		64.26	78			64.03	64		63.74	84		63.48	82		64.29	86		64.04	79		63.69	82			63.81	40		63.55	37		62.93	35		63.72	39
64.11	72		63.84	65		63.66	64		63.77	74		63.71	66		64.43	75			64.32	75		63.92	78		63.5	76		64.42	79		64.22	76		63.93	86			64.01	39		63.77	34		63.16	35		63.88	33
64.21	64		64.06	72		63.85	68		64	72		63.84	70		64.63	76			64.5	74		64.06	80		63.81	73		64.56	78		64.4	74		64.11	81			64.22	39		63.95	37		63.33	36		64.12	33
64.52	71		64.24	68		64.06	66		64.19	71		64.1	69		64.77	75			64.66	72		64.42	77		64.14	82		64.82	77		64.54	80		64.32	85			64.39	38		64.14	35		63.5	37		64.31	34
64.72	69		64.48	71		64.27	64		64.35	65		64.27	68		65.06	74			64.95	73		64.63	80		64.42	79		65.09	84		64.9	78		64.38	82			64.61	39		64.34	38		63.69	39		64.53	35
64.99	69		64.62	68		64.45	71		64.53	68		64.42	66		65.23	73			65.1	80		64.92	80		64.46	80		65.37	84		65.17	80		64.7	84			64.79	34		64.49	37		63.92	34		64.71	36
65.04	69		64.8	66		64.68	62		64.77	66		64.64	65		65.41	82			65.29	72		65.01	77		64.74	78		65.51	82		65.19	77		65	87			65	36		64.7	38		64.12	36		64.95	35
65.25	66		65.19	65		64.87	66		64.88	68		64.82	69		65.6	74			65.48	74		65.22	80		65.27	74		65.72	78		65.42	77		65.27	89			65.24	40		64.96	38		64.27	33		65.14	39
65.45	67		65.12	70		65.09	69		65.16	69		65.06	64		65.85	74			65.67	73		65.45	85		65.45	80		65.88	84		65.52	78		65.41	84			65.42	43		65.11	34		64.48	31		65.3	36
65.61	67		65.54	65		65.27	65		65.35	71		65.17	62		65.99	77			65.88	74		65.67	77		65.41	78		66.17	83		65.88	78		65.59	88			65.59	41		65.42	38		64.74	34		65.53	33
65.86	65		65.7	63		65.46	65		65.46	67		65.4	60		66.23	72			65.99	75		65.85	79		65.62	81		66.3	80		66.02	84		65.81	81			65.77	39		65.6	37		64.92	36		65.75	35
66.04	65		65.88	68		65.69	65		65.69	67		65.54	64		66.41	74			66.2	75		66.07	84		65.95	75		66.47	91		66.26	82		65.97	85			66.01	45		65.8	37		65.08	34		65.93	33
66.26	69		66.15	63		65.85	62		65.85	70		65.73	65		66.57	75			66.46	76		66.2	81		65.88	79		66.68	82		66.42	80		66.28	86			66.18	41		65.96	38		65.24	37		66.13	39
66.47	69		66.27	64		66.07	67		66.12	64		65.95	64		66.81	76			66.7	81		66.39	83		66.28	82		67	84		66.73	81		66.37	83			66.41	36		66.17	38		65.51	36		66.31	37
66.66	61		66.49	67		66.27	69		66.31	69		66.14	62		67	76			66.85	79		66.57	81		65.93	80		67.06	88		66.73	84		66.54	86			66.64	43		66.34	40		65.72	37		66.46	39
66.79	64		66.56	70		66.54	67		66.41	65		66.35	66		67.26	79			66.99	81		66.74	80		66.54	85		67.39	85		67.06	80		66.82	86			66.78	42		66.52	39		65.88	36		66.74	35
67.02	68		66.88	64		66.78	62		66.64	67		66.6	67		67.4	82			67.27	86		66.97	86		66.97	83		67.46	83		67.24	81		67	88			66.99	41		66.74	41		66.07	38		66.92	37
67.21	67		67.13	67		66.92	64		66.82	66		66.74	64		67.67	76			67.66	81		67.13	81		66.88	78		67.56	82		67.52	85		67.04	91			67.17	40		66.95	38		66.3	36		67.13	37
67.56	68		67.21	68		67.06	64		67.06	67		66.96	61		67.81	79			67.8	82		67.38	86		67.1	85		67.89	88		67.56	82		67.37	87			67.37	40		67.19	41		66.49	33		67.27	39
67.6	71		67.5	67		67.27	63		67.18	64		67.17	65		67.97	77			67.85	81		67.53	87		67.35	84		68.1	93		67.81	85		67.5	84			67.66	45		67.35	32		66.69	37		67.49	35
67.93	67		67.59	71		67.61	65		67.42	67		67.42	74		68.28	80			68.1	82		67.63	92		67.67	83		68.15	85		67.99	90		67.59	89			67.81	42		67.59	40		66.81	34		67.72	38
68.07	70		67.88	68		67.71	67		67.56	74		67.51	67		68.54	80			68.44	85		67.94	92		67.45	89		68.32	87		68.2	93		67.88	89			67.97	43		67.8	38		67.13	38		67.83	41
68.18	70		68.12	72		67.96	71		67.8	69		67.74	65		68.72	82			68.57	85		68.09	92		67.77	90		68.56	87		68.5	90		68.06	91			68.18	41		67.94	38		67.32	38		68.07	39
68.44	72		68.26	73		68.09	70		67.99	71		67.97	67		68.92	80			68.71	91		68.31	90		67.85	81		68.77	93		68.79	86		68.31	97			68.34	42		68.17	44		67.46	35		68.23	36
68.7	72		68.49	69		68.34	74		68.13	66		68.2	69		69.11	80			68.95	82		68.4	89		68.23	90		69.09	89		68.99	93		68.5	92			68.55	45		68.32	41		67.7	38		68.48	37
68.71	71		68.66	74		68.48	69		68.42	69		68.34	69		69.35	83			69.14	93		68.69	88		68.47	85		69.31	88		69.14	89		68.61	99			68.85	44		68.49	42		67.88	41		68.66	39
69.07	74		68.92	75		68.66	66		68.62	71		68.62	62		69.57	85			69.32	91		68.81	96		68.49	89		69.44	94		69.35	95		68.77	94			68.95	46		68.69	40		68.12	37		68.88	43
69.23	78		69.09	74		68.92	75		68.77	69		68.81	68		69.75	85			69.52	90		69.03	95		68.69	86		69.62	95		69.42	92		68.99	98			69.17	48		68.93	41		68.32	38		69.09	36
69.52	72		69.28	70		68.99	73		68.99	70		68.97	72		69.81	82			69.65	91		69.31	100		68.85	91		69.83	97		69.81	94		69.22	95			69.4	45		69.14	44		68.49	43		69.3	41
69.46	77		69.45	71		69.24	76		69.2	72		69.14	72		70.09	82			69.88	95		69.4	93		69.22	96		70.12	98		69.85	95		69.4	99			69.6	47		69.23	41		68.74	43		69.49	46
69.8	77		69.7	74		69.45	71		69.42	74		69.35	72		70.33	84			70.11	91		69.73	94		69.4	96		70.31	95		70.06	91		69.54	103			69.8	49		69.5	47		68.93	42		69.68	44
70.13	84		69.81	74		69.6	73		69.63	73		69.6	74		70.49	89			70.28	94		69.9	93		69.55	94		70.57	99		70.36	95		69.88	99			70	46		69.75	45		69.12	41		69.89	42
70.28	77		70.09	77		69.82	76		69.83	72		69.82	73		70.66	91			70.42	92		70.06	98		69.63	96		70.59	102		70.42	96		69.95	98			70.08	50		69.85	44		69.33	41		70.09	44
70.49	83		70.38	75		70.09	76		70	77		69.98	75		70.78	92			70.63	96		70.28	96		70.1	103		70.79	104		70.6	92		70.24	104			70.39	47		70.06	48		69.48	40		70.31	47
70.7	81		70.59	77		70.22	79		70.2	81		70.25	78		71.04	91			70.88	99		70.38	102		70.36	94		71.07	105		70.88	103		70.43	107			70.57	49		70.31	50		69.7	40		70.46	40
70.81	84		70.88	83		70.41	80		70.46	82		70.42	74		71.22	94			71.07	104		70.76	93		70.46	103		71.22	105		70.88	99		70.6	103			70.79	52		70.52	52		69.9	43		70.71	43
71.23	79		70.96	80		70.74	75		70.66	83		70.63	73		71.42	94			71.23	98		70.92	100		70.6	104		71.47	107		71.25	101		70.74	109			70.93	50		70.65	48		70.05	43		70.88	45
71.22	85		71.2	74		70.88	80		70.86	83		70.85	78		71.6	93			71.49	105		71.11	104		70.84	93		71.67	104		71.39	107		71.02	112			71.2	52		70.92	48		70.33	46		71.06	44
71.27	86		71.27	85		71.01	87		71.04	80		71.04	82		71.74	94			71.58	106		71.27	108		71.06	101		72.08	104		71.56	99		71.23	106			71.36	52		71.09	53		70.51	42		71.29	51
71.52	86		71.52	86		71.2	78		71.28	84		71.25	76		71.94	99			71.85	109		71.57	108		71.03	107		71.94	111		71.91	106		71.36	110			71.58	51		71.37	48		70.68	46		71.42	49
71.82	91		71.67	83		71.42	87		71.42	84		71.46	80		72.13	108			71.96	106		71.69	105		71.29	105		72.1	115		71.95	104		71.53	107			71.73	54		71.52	55		70.88	46		71.67	48
71.99	82		71.96	89		71.57	80		71.69	84		71.6	81		72.39	106			72.18	113		71.88	105		71.77	105		72.29	107		72.16	111		71.83	118			71.98	55		71.74	55		71.01	44		71.88	48
72.2	90		72.06	92		71.82	86		71.82	87		71.82	83		72.56	104			72.39	105		72.1	111		71.69	109		72.45	116		72.42	107		71.93	111			72.11	53		71.88	50		71.27	44		72.1	52
72.46	97		72.31	93		72.02	88		72.02	92		72.03	83		72.73	105			72.64	114		72.36	111		71.75	108		72.81	113		72.53	115		72.23	116			72.32	53		72.1	55		71.42	51		72.28	51
72.62	97		72.49	88		72.29	89		72.26	94		72.18	88		72.97	108			72.85	111		72.45	112		72.24	111		72.99	124		72.78	116		72.37	123			72.49	55		72.28	55		71.65	51		72.49	48
72.78	99		72.75	94		72.44	92		72.53	97		72.49	91		73.13	118			72.95	109		72.86	116		72.13	111		73.3	118		72.95	116		72.61	122			72.75	55		72.45	57		71.85	51		72.75	52
73.03	96		72.82	93		72.62	95		72.6	87		72.7	83		73.38	109			73.13	123		72.81	114		72.6	114		73.43	130		73.2	114		72.78	118			72.89	56		72.69	56		72.05	52		72.87	50
73.23	102		73.17	96		72.81	97		72.85	89		72.89	88		73.62	120			73.35	118		73.13	122		72.67	118		73.58	118		73.43	112		72.98	125			73.17	55		72.82	56		72.24	52		73.05	55
73.38	101		73.26	96		73.06	95		73.06	95		73.09	90		73.72	113			73.54	128		73.45	123		73.13	118		73.82	130		73.61	128		73.27	123			73.31	57		73.11	60		72.45	50		73.2	51
73.49	97		73.62	99		73.27	97		73.24	95		73.26	99		73.87	116			73.74	127		73.45	123		73.31	125		74.02	130		73.76	118		73.38	125			73.58	58		73.3	55		72.64	53		73.52	56
73.71	105		73.6	100		73.33	97		73.43	97		73.45	97		74.12	124			73.89	121		73.66	128		73.52	118		74.32	129		73.95	126		73.62	130			73.76	61		73.49	62		72.78	49		73.63	58
73.99	103		73.88	99		73.63	105		73.67	102		73.66	96		74.36	125			74.23	127		73.89	127		73.72	125		74.43	129		74.25	133		73.95	129			73.91	60		73.7	60		73.02	55		73.91	57
74.28	103		74	103		73.79	104		73.91	107		73.87	101		74.54	128			74.38	130		74.13	127		73.68	126		74.63	134		74.49	134		73.99	135			74.17	66		73.85	62		73.23	59		74.08	57
74.41	109		74.29	103		74.12	103		74.1	107		74.06	99		74.72	118			74.6	130		74.33	128		74.06	131		74.87	144		74.54	129		74.32	130			74.36	64		74.1	63		73.42	56		74.2	57
74.64	111		74.48	104		74.17	107		74.31	99		74.21	101		74.95	131			74.77	130		74.44	134		74.17	136		75.15	142		74.95	140		74.43	139			74.55	66		74.31	66		73.63	60		74.42	59
74.69	114		74.51	107		74.38	109		74.46	97		74.42	103		75.19	128			75.01	137		74.85	131		74.48	139		75.29	139		75.04	132		74.63	137			74.72	65		74.51	68		73.79	57		74.63	62
74.9	114		74.88	111		74.59	113		74.68	114		74.67	104		75.35	128			75.28	141		74.97	140		74.63	133		75.49	143		75.06	147		74.88	137			74.92	66		74.68	71		73.99	61		74.84	63
75.03	125		74.98	112		74.79	106		74.85	112		74.79	107		75.63	133			75.46	146		75.21	143		75.08	140		75.7	148		75.39	143		75.02	142			75.1	72		74.91	69		74.23	60		75.03	59
75.35	120		75.17	112		75.01	112		75.07	114		74.95	113		75.8	139			75.62	145		75.32	138		75.24	145		75.95	157		75.52	141		75.26	143			75.31	71		75.07	68		74.41	61		75.23	63
75.57	125		75.55	118		75.18	112		75.31	121		75.17	110		75.98	143			75.88	147		75.47	148		75.42	141		76.06	152		75.78	137		75.45	146			75.57	73		75.29	63		74.6	64		75.45	65
75.8	128		75.6	115		75.37	119		75.47	120		75.44	112		76.14	140			76.04	151		75.83	151		75.73	147		76.24	152		75.83	146		75.68	150			75.7	72		75.46	72		74.87	64		75.68	68
76.02	128		75.81	121		75.59	119		75.65	123		75.53	114		76.34	144			76.2	158		75.83	149		75.49	151		76.5	154		76.26	155		75.9	150			75.88	77		75.67	72		75.06	67		75.87	66
76.15	126		76.09	120		75.75	123		75.83	121		75.67	123		76.54	140			76.45	161		76.08	151		75.87	154		76.56	160		76.38	157		76.12	156			76.21	73		75.83	76		75.24	67		76.02	64
76.42	124		76.17	125		75.95	120		76.01	127		75.9	119		76.77	149			76.62	153		76.35	154		76.06	154		76.63	165		76.62	160		76.26	160			76.38	76		76.06	71		75.44	69		76.22	67
76.65	135		76.5	127		76.19	127		76.29	131		76.08	120		76.97	159			76.85	161		76.56	165		76.39	165		76.95	160		76.79	158		76.48	156			76.59	74		76.24	77		75.63	69		76.42	69
76.78	136		76.54	134		76.34	128		76.47	126		76.27	120		77.2	153			76.99	166		76.69	161		76.27	160		77.07	170		76.92	166		76.74	164			76.73	77		76.45	77		75.88	72		76.62	67
76.97	138		76.71	137		76.59	128		76.63	128		76.53	126		77.37	150			77.25	167		76.84	167		76.43	162		77.27	174		77.18	162		76.9	169			76.94	80		76.63	79		76.06	74		76.77	70
77.17	142		77.12	129		76.74	131		76.81	135		76.69	127		77.56	157			77.42	179		77.08	161		76.49	171		77.51	172		77.41	172		77.14	174			77.17	83		76.86	75		76.24	65		77.05	75
77.39	141		77.2	132		76.97	128		77.02	132		76.9	129		77.79	157			77.74	172		77.25	163		77.2	167		77.74	175		77.64	167		77.31	171			77.32	81		76.99	81		76.43	76		77.17	72
77.88	151		77.46	135		77.24	138		77.21	140		77.1	133		77.95	166			77.99	180		77.48	179		77.35	172		77.96	182		77.74	181		77.5	174			77.53	78		77.25	85		76.65	76		77.37	71
77.99	148		77.6	144		77.48	136		77.45	145		77.24	137		78.15	170			78.15	186		77.64	176		77.43	175		78.17	183		78.07	182		77.79	170			77.71	84		77.45	82		76.82	78		77.62	77
78.06	149		77.74	147		77.7	147		77.57	146		77.53	137		78.35	166			78.29	182		77.8	177		77.35	178		78.45	189		78.22	189		77.87	190			77.93	84		77.65	83		77.01	76		77.74	76
																																						78.12	84		77.85	90		77.27	77		77.95	76
																																						78.32	88		78.07	88		77.46	77		78.24	82
																																						78.52	84		78.24	88		77.65	81		78.45	80
[truncated: 4 more columns]

## Sheet: WL C. thermalis
Repeat 1																			Repeat 2																			Repeat 3
	1 flash			2 flashes			3 flashes			4 flashes			5 flashes			6 flashes				1 flash			2 flashes			3 flashes			4 flashes			5 flashes			6 flashes				1flash			2flashes			3flashes			4flashes
4.19	10		4.12	20		4.67	22		3.92	19		3.66	17		3.94	24			4.39	5		4	2		6.99	3		3.81	5		4.46	2		4.19	2			4.04	5		4.25	7		3.81	9		4.01	7
4.33	12		4.44	19		4.88	25		4.17	17		3.86	15		4.13	24			4.58	6		4.25	3		7.27	3		4.02	5		4.64	3		4.44	2			4.01	5		4.14	6		3.82	7		3.97	9
4.52	11		4.52	22		5.06	21		4.38	17		4.06	16		4.35	27			4.77	5		4.52	2		7.56	3		4.2	6		4.87	3		4.67	2			4.04	6		4.1	6		3.86	8		3.88	7
4.7	10		4.85	16		5.31	24		4.52	18		4.29	18		4.45	30			5.02	6		4.64	2		7.77	2		4.46	5		5.08	3		4.88	3			4.07	5		4.09	5		3.84	6		3.96	6
4.85	13		5.03	20		5.43	27		4.75	17		4.44	18		4.74	26			5.22	5		4.93	2		8	3		4.67	5		5.23	3		5.08	3			4.06	5		4.12	6		3.85	8		3.91	7
5.17	10		5.2	19		5.72	26		4.94	19		4.69	16		4.94	30			5.44	5		5.13	2		8.38	2		4.85	6		5.53	3		5.18	2			3.97	5		4.1	6		3.81	7		3.9	9
5.23	10		5.45	18		5.83	26		5.13	19		4.91	17		5.14	27			5.6	5		5.25	2		8.42	3		5.1	6		5.68	2		5.54	2			4.06	5		4.17	7		3.82	8		3.91	7
5.44	10		5.6	20		6.02	26		5.42	18		5.03	18		5.43	29			5.88	5		5.42	2		8.63	2		5.19	5		5.97	3		5.77	2			4.07	6		4.1	6		3.77	6		3.88	7
5.75	10		5.75	20		6.24	25		5.54	20		5.25	20		5.48	30			5.99	6		5.64	1		8.8	3		5.47	7		6.13	2		5.89	3			4.07	6		4.05	6		3.81	8		3.94	6
5.87	11		5.98	18		6.49	27		5.73	20		5.43	19		5.67	29			6.44	4		5.85	2		8.85	2		5.64	5		6.27	2		6.1	3			4.19	5		4.12	6		3.85	7		3.97	7
6.12	13		6.16	20		6.68	26		5.97	18		5.63	18		5.94	27			6.63	5		5.94	2		9.02	3		5.85	5		6.43	3		6.33	2			4.25	5		4.23	7		3.92	6		4.01	8
6.29	10		6.47	21		6.79	24		6.18	20		5.89	22		6.12	33			6.78	6		6.2	2		9.16	2		5.97	5		6.72	3		6.48	2			4.29	6		4.24	5		3.91	8		4.13	8
6.42	12		6.62	23		7.14	27		6.43	19		6.1	21		6.31	29			6.89	6		6.42	2		9.26	2		6.18	6		6.91	4		6.66	2			4.39	6		4.27	7		4.05	6		4.21	7
6.69	12		6.77	22		7.24	26		6.53	20		6.25	23		6.52	31			7.18	6		6.56	1		9.35	3		6.45	5		7.06	3		6.93	2			4.48	6		4.37	6		4.1	8		4.24	7
6.89	11		7.04	21		7.48	30		6.85	21		6.49	24		6.69	32			7.38	5		6.72	2		9.43	2		6.67	5		7.24	4		7.15	3			4.6	6		4.46	4		4.27	6		4.45	8
7.02	11		7.24	23		7.63	28		6.93	25		6.69	22		6.87	33			7.46	4		6.98	2		9.52	2		6.81	7		7.43	3		7.37	3			4.73	5		4.64	6		4.33	7		4.65	8
7.2	10		7.37	23		7.83	29		7.2	20		6.88	23		7.15	31			7.81	5		7.18	2		9.66	3		7.04	6		7.73	3		7.37	3			4.92	5		4.83	8		4.56	7		4.85	7
7.49	14		7.46	23		8.04	30		7.4	20		7.06	21		7.23	31			7.95	6		7.31	1		9.72	2		7.21	5		7.81	3		7.65	2			5.04	5		4.97	6		4.6	8		5.08	8
7.75	13		7.75	25		8.29	30		7.56	21		7.29	26		7.49	29			8.25	5		7.6	3		9.75	2		7.43	6		7.99	4		7.81	3			5.31	6		5.12	6		4.75	6		5.17	7
7.92	14		7.98	22		8.46	28		7.84	21		7.45	23		7.69	31			8.44	4		7.71	2		9.94	3		7.56	5		8.25	4		8.04	3			5.52	6		5.35	6		4.98	8		5.54	8
8.05	10		8.11	22		8.61	26		8.02	20		7.77	26		7.92	30			8.6	5		7.89	3		10.13	2		7.81	5		8.38	4		8.15	2			5.63	4		5.6	7		5.18	7		5.67	8
8.2	12		8.38	21		8.81	31		8.21	21		7.83	29		8.09	30			8.76	4		8.08	3		10.17	2		7.95	5		8.63	4		8.46	3			5.98	6		5.87	5		5.42	8		5.97	8
8.45	13		8.61	25		9.11	30		8.35	22		8.09	26		8.19	31			8.96	6		8.38	2		10.26	2		8.25	4		8.75	4		8.66	3			6.18	6		6.22	7		5.74	6		6.13	7
8.65	12		8.85	23		9.32	31		8.6	21		8.24	27		8.45	32			9.12	4		8.57	2		10.42	3		8.38	4		9.01	4		8.87	2			6.43	6		6.44	7		5.98	6		6.41	8
8.85	11		8.96	22		9.49	28		8.8	22		8.45	26		8.63	31			9.35	6		8.72	1		10.55	3		8.61	5		9.22	4		8.99	3			6.81	6		6.74	8		6.1	7		6.68	7
9.12	12		9.13	22		9.66	29		8.96	24		8.63	24		8.85	30			9.44	6		8.88	3		10.67	3		8.81	6		9.39	3		9.2	3			6.94	6		7.03	7		6.35	6		6.99	7
9.28	13		9.37	24		9.88	29		9.09	21		8.84	30		9.06	33			9.74	6		9.17	4		10.83	4		9.05	6		9.56	3		9.31	4			7.23	6		7.37	5		6.74	7		7.25	9
9.45	13		9.58	25		10.09	31		9.31	25		9.01	28		9.24	33			9.92	5		9.27	3		11.11	4		9.18	5		9.79	5		9.49	3			7.49	5		7.67	7		6.92	6		7.54	8
9.64	13		9.85	26		10.31	32		9.54	25		9.22	28		9.43	32			10.13	5		9.56	2		11.38	4		9.43	6		9.95	4		9.83	4			7.75	7		7.81	8		7.18	10		7.68	8
9.96	11		9.98	25		10.46	32		9.75	23		9.43	30		9.69	33			10.27	5		9.72	2		11.44	2		9.64	4		10.17	4		10.1	4			8.05	7		8.15	7		7.46	8		7.98	8
10.15	15		10.13	29		10.74	32		9.93	25		9.7	29		9.88	33			10.46	6		9.92	3		11.57	3		9.81	5		10.36	5		10.3	3			8.23	7		8.38	7		7.79	6		8.32	9
10.34	11		10.36	27		10.85	35		10.13	25		9.87	31		10.06	36			10.63	6		10.09	2		11.83	3		10	4		10.58	4		10.45	2			8.61	7		8.56	9		8.08	7		8.57	8
10.42	13		10.63	29		11.08	30		10.34	27		10.05	31		10.34	42			10.85	7		10.32	3		11.91	5		10.17	7		10.78	5		10.62	3			8.84	7		8.9	8		8.3	8		8.81	9
10.74	13		10.77	31		11.34	33		10.51	26		10.26	29		10.46	41			11.1	6		10.6	2		12.12	4		10.35	6		11.03	5		10.77	4			9.09	7		9.12	7		8.57	8		9.06	9
10.92	14		10.98	31		11.51	34		10.74	27		10.46	30		10.68	38			11.41	5		10.85	3		12.38	4		10.58	5		11.19	5		10.98	3			9.37	7		9.38	7		8.92	9		9.39	11
11.09	13		11.25	35		11.7	37		10.94	27		10.64	30		10.92	39			11.63	4		10.98	3		12.65	4		10.81	6		11.35	4		11.29	3			9.53	7		9.68	10		9.18	8		9.63	8
11.31	14		11.44	33		11.91	36		11.11	27		10.88	36		11.06	42			11.8	6		11.17	3		12.8	5		11.02	7		11.56	5		11.34	4			9.84	7		9.77	9		9.43	8		9.93	11
11.51	12		11.63	33		12.06	35		11.23	28		11.04	34		11.29	42			11.95	5		11.31	3		13.06	4		11.24	6		11.78	6		11.66	4			10.05	8		10.05	7		9.6	10		10.2	9
11.72	13		11.77	39		12.33	36		11.58	31		11.21	36		11.47	45			12.2	6		11.6	2		13.13	4		11.42	6		11.99	6		11.89	4			10.23	7		10.21	9		9.85	8		10.38	9
11.93	15		12.07	38		12.45	38		11.8	33		11.38	34		11.61	48			12.37	6		11.8	4		13.42	4		11.66	7		12.13	5		12.11	3			10.44	7		10.41	8		10.02	8		10.56	9
12.2	16		12.18	39		12.72	41		12.02	31		11.67	35		11.99	49			12.56	7		11.97	4		13.53	5		11.87	5		12.45	5		12.16	4			10.66	8		10.67	9		10.27	9		10.8	9
12.31	15		12.44	40		12.89	44		12.11	33		11.92	34		12.1	49			12.78	6		12.25	4		13.74	4		12.03	5		12.56	5		12.35	5			10.87	8		10.85	9		10.45	8		10.88	10
12.54	16		12.56	40		13.08	42		12.31	35		12.03	33		12.24	50			13.1	6		12.4	4		13.99	4		12.28	7		12.84	4		12.59	5			11.08	7		10.95	8		10.68	7		11.17	9
12.74	16		12.76	41		13.25	48		12.63	36		12.28	33		12.52	51			13.17	7		12.63	5		14.24	4		12.43	5		13.01	4		12.76	5			11.23	7		11.17	9		10.87	10		11.38	11
12.89	19		13.02	44		13.51	45		12.74	37		12.45	37		12.77	51			13.44	7		12.74	4		14.48	5		12.63	9		13.19	5		13.01	6			11.41	8		11.35	10		10.99	9		11.5	9
13.08	19		13.3	45		13.63	46		12.97	36		12.7	36		12.98	56			13.53	7		13.02	3		14.74	5		12.8	8		13.46	6		13.35	4			11.63	8		11.49	8		11.3	8		11.72	13
13.4	18		13.45	40		13.88	46		13.23	42		12.86	40		13.12	53			13.73	5		13.19	4		14.85	6		13.06	7		13.7	4		13.55	5			11.78	8		11.7	10		11.49	9		11.81	9
13.49	19		13.6	45		14.13	51		13.4	40		13.1	35		13.32	55			13.87	6		13.44	4		15.02	6		13.21	7		13.88	6		13.67	5			11.96	6		11.93	9		11.62	9		11.99	11
13.73	16		13.83	46		14.28	51		13.63	39		13.31	39		13.49	58			14.2	8		13.74	6		15.25	6		13.44	9		14.02	5		13.85	5			12.22	7		12.07	9		11.83	10		12.2	11
13.95	19		14.04	51		14.58	51		13.83	39		13.52	39		13.72	64			14.35	8		13.92	5		15.46	6		13.7	8		14.3	7		14.02	4			12.29	8		12.24	8		11.95	8		12.31	11
14.15	21		14.17	51		14.73	51		14.04	44		13.67	39		13.99	65			14.52	8		14.13	5		15.69	6		13.81	8		14.47	6		14.21	6			12.63	8		12.4	8		12.25	9		12.55	10
14.45	19		14.45	52		14.88	56		14.24	41		14.02	36		14.15	59			14.73	6		14.35	5		15.92	6		14.09	9		14.74	7		14.45	5			12.86	9		12.61	9		12.45	9		12.74	10
14.54	20		14.69	51		15.23	56		14.38	49		14.16	39		14.36	61			14.92	9		14.49	6		16.03	9		14.31	9		14.86	8		14.77	4			13.03	8		12.81	10		12.61	10		12.92	12
14.73	20		14.81	53		15.24	59		14.56	46		14.31	46		14.54	65			15.19	6		14.69	7		16.28	9		14.45	6		15.08	6		14.99	5			13.12	9		12.95	9		12.86	12		13.06	10
14.99	23		15.03	53		15.46	59		14.81	46		14.52	41		14.71	69			15.3	7		14.95	5		16.35	8		14.69	8		15.24	7		15.23	5			13.35	8		13.18	10		12.99	10		13.24	10
15.17	24		15.27	58		15.77	63		15.1	49		14.71	42		14.95	72			15.62	7		15.08	5		16.52	9		14.88	9		15.49	7		15.41	7			13.56	8		13.34	10		13.15	10		13.36	9
15.31	22		15.41	59		15.85	60		15.32	45		14.91	43		15.17	68			15.83	7		15.25	6		16.67	10		15.08	11		15.7	7		15.45	6			13.68	9		13.49	11		13.36	13		13.63	11
15.51	22		15.58	60		16.13	63		15.49	48		15.14	45		15.32	70			15.9	7		15.49	7		16.92	9		15.29	8		15.86	7		15.6	6			13.98	7		13.78	10		13.59	9		13.77	9
15.77	24		15.88	65		16.34	64		15.57	49		15.3	42		15.52	70			16.07	8		15.69	7		17.2	10		15.49	9		16.06	9		15.85	7			14.04	9		13.9	10		13.81	11		13.95	12
15.96	23		16.01	63		16.54	65		15.77	49		15.55	46		15.74	71			16.31	8		15.81	7		17.31	10		15.68	9		16.29	9		16.03	6			14.28	7		14.07	10		13.93	12		14.11	12
16.11	22		16.2	67		16.73	69		16.05	49		15.72	48		16	72			16.61	9		16.06	8		17.6	9		15.85	9		16.48	9		16.35	7			14.42	10		14.31	12		14.13	11		14.42	11
16.42	22		16.42	64		16.94	71		16.2	49		15.89	49		16.1	78			16.73	10		16.28	7		17.77	11		16.06	10		16.59	8		16.52	7			14.64	7		14.52	13		14.36	10		14.67	10
16.59	30		16.57	71		17.13	70		16.37	54		16.14	46		16.31	75			16.85	8		16.4	9		17.85	11		16.26	10		16.87	8		16.78	8			14.81	9		14.65	13		14.56	11		14.77	9
16.78	26		16.85	76		17.38	71		16.7	53		16.29	48		16.52	79			17.07	9		16.63	7		18	12		16.44	10		17.1	9		16.94	8			14.99	9		14.91	13		14.71	10		15.08	12
16.92	27		16.96	73		17.59	75		16.88	55		16.42	45		16.7	76			17.27	10		16.85	9		18.16	13		16.62	12		17.28	10		16.96	10			15.27	8		15.03	13		14.9	12		15.16	12
17.15	24		17.29	72		17.74	73		16.99	58		16.72	47		16.95	73			17.57	11		16.94	10		18.44	13		16.92	13		17.52	9		17.28	9			15.38	10		15.31	12		15.13	14		15.51	11
17.31	28		17.44	77		18	74		17.28	57		16.9	47		17.1	74			17.65	10		17.2	9		18.67	13		17.05	11		17.67	10		17.52	9			15.6	10		15.55	10		15.27	12		15.67	14
17.52	27		17.62	73		18.15	72		17.43	58		17.07	49		17.24	81			17.92	11		17.46	10		18.88	16		17.27	11		17.89	10		17.67	10			15.88	9		15.68	13		15.52	11		15.89	13
17.74	30		17.85	83		18.4	78		17.62	54		17.28	48		17.56	84			18.17	11		17.63	11		19.07	17		17.35	13		18.09	11		17.92	10			16.02	10		15.92	10		15.68	12		16.1	12
17.92	28		18.06	82		18.52	79		17.85	55		17.48	46		17.76	87			18.24	13		17.76	13		19.13	15		17.7	13		18.26	13		18.1	12			16.22	10		16.14	11		15.92	12		16.22	12
18.17	28		18.26	76		18.72	86		17.98	58		17.65	49		17.92	86			18.52	14		17.96	14		19.23	15		17.92	16		18.48	12		18.35	13			16.49	11		16.38	15		16.17	13		16.49	11
18.35	27		18.45	85		18.92	82		18.18	64		17.85	51		18.17	88			18.76	12		18.18	14		19.49	20		18.01	12		18.67	14		18.53	15			16.67	9		16.68	11		16.34	12		16.72	12
18.57	29		18.68	84		19.13	85		18.42	63		18.06	49		18.28	85			18.85	12		18.29	14		19.63	19		18.29	13		18.88	14		18.55	14			16.88	12		16.87	15		16.5	14		17.01	13
18.83	29		18.81	84		19.25	85		18.64	63		18.27	50		18.49	91			19.13	14		18.53	17		19.95	20		18.51	15		19.13	17		18.79	14			17.06	10		17.05	13		16.7	12		17.21	13
18.96	31		19.05	91		19.43	87		18.78	61		18.49	46		18.67	92			19.24	13		18.85	14		20.11	23		18.68	15		19.2	16		19.06	15			17.28	10		17.33	15		17.01	13		17.38	12
19.2	30		19.33	93		19.77	90		19	65		18.72	52		18.9	89			19.56	16		18.96	17		20.38	22		18.94	17		19.42	16		19.17	15			17.52	10		17.54	14		17.11	15		17.55	12
19.42	32		19.49	93		19.95	89		19.2	66		18.94	54		19.14	96			19.85	14		19.23	18		20.52	21		19.13	18		19.63	15		19.53	16			17.67	10		17.67	15		17.38	14		17.79	14
19.6	34		19.63	98		20.13	88		19.38	67		19.16	54		19.31	94			20.02	16		19.34	18		20.68	22		19.25	19		19.84	18		19.68	17			17.92	10		17.92	13		17.63	14		18.07	13
19.84	31		19.86	95		20.21	89		19.64	68		19.25	53		19.56	95			20.15	16		19.66	22		20.78	25		19.42	20		20.08	18		19.88	19			18.05	11		18.13	17		17.78	14		18.18	14
19.97	31		20.04	94		20.5	93		19.76	71		19.53	54		19.75	96			20.35	20		19.73	20		20.9	24		19.73	22		20.25	20		20.09	21			18.38	11		18.34	15		18.01	14		18.4	15
20.19	34		20.19	99		20.74	95		20.01	68		19.71	53		19.93	98			20.52	19		19.99	20		21.21	29		19.81	20		20.46	19		20.11	21			18.55	10		18.52	16		18.2	12		18.7	13
20.33	30		20.52	101		20.92	94		20.24	69		19.91	50		20.06	95			20.74	20		20.14	25		21.49	28		20.02	21		20.63	19		20.42	25			18.72	13		18.66	16		18.5	14		18.92	15
20.56	33		20.65	101		21.1	102		20.38	66		20.19	55		20.33	97			20.89	19		20.39	27		21.65	31		20.2	21		20.83	23		20.61	22			18.95	13		18.86	16		18.73	17		19.12	14
20.74	31		20.85	103		21.34	96		20.59	70		20.35	62		20.59	104			21.27	22		20.56	27		21.92	32		20.5	22		21.07	25		20.79	26			19.13	11		19.1	17		18.81	15		19.24	12
20.99	35		21.09	109		21.48	102		20.82	74		20.48	54		20.67	107			21.41	22		20.78	29		22.05	30		20.58	25		21.23	25		21.05	25			19.38	12		19.24	18		19.07	13		19.63	15
21.18	37		21.27	103		21.74	102		20.99	75		20.77	60		20.92	106			21.54	22		20.99	30		22.14	34		20.9	22		21.46	24		21.36	29			19.55	11		19.49	17		19.25	15		19.81	14
21.38	33		21.52	112		21.93	105		21.19	69		20.96	54		21.13	106			21.78	24		21.24	33		22.31	38		21.13	25		21.56	26		21.44	28			19.68	12		19.69	15		19.42	17		20.01	15
21.53	35		21.65	110		22.18	106		21.44	74		21.14	59		21.41	105			21.95	23		21.44	34		22.46	33		21.27	28		21.8	28		21.75	29			19.97	12		19.92	17		19.75	16		20.17	12
21.71	36		21.89	109		22.38	106		21.65	74		21.32	56		21.62	109			22.06	30		21.59	37		22.67	33		21.41	28		22.1	24		21.81	31			20.13	13		20.02	16		20.08	17		20.43	13
21.99	37		22.02	113		22.47	104		21.81	78		21.53	59		21.85	112			22.46	26		21.83	34		22.93	39		21.6	29		22.2	27		21.93	34			20.37	14		20.27	15		20.1	17		20.65	13
22.17	38		22.29	120		22.7	109		22	82		21.71	61		21.98	112			22.59	28		22.05	37		23.2	40		21.91	31		22.36	30		22.2	33			20.5	12		20.42	18		20.33	15		20.72	13
22.31	39		22.52	120		22.98	104		22.22	73		21.96	67		22.22	117			22.92	30		22.24	38		23.31	37		22.02	30		22.59	32		22.38	35			20.74	14		20.62	18		20.52	18		21.03	13
22.56	35		22.67	129		23.13	109		22.38	81		22.12	65		22.36	112			23.05	32		22.42	41		23.55	41		22.27	33		22.77	30		22.7	40			20.99	13		20.85	18		20.77	19		21.18	13
22.77	38		22.87	128		23.33	112		22.65	80		22.38	64		22.55	116			23.25	33		22.6	43		23.67	40		22.49	33		23.07	30		22.87	43			21.2	13		21.12	20		20.96	18		21.3	15
22.98	38		23.11	133		23.54	112		22.81	79		22.55	65		22.75	117			23.41	31		22.82	42		23.86	38		22.67	34		23.33	29		23.07	45			21.46	15		21.21	19		21.12	16		21.54	13
23.17	39		23.27	130		23.74	120		23.05	80		22.7	65		22.92	118			23.65	31		23.06	43		24.03	44		22.81	37		23.4	34		23.4	45			21.59	14		21.41	16		21.32	19		21.82	16
23.29	38		23.49	129		23.96	115		23.27	84		22.94	65		23.06	121			23.79	37		23.27	46		24.22	45		23.05	38		23.59	33		23.48	47			21.85	14		21.63	19		21.47	18		21.88	15
23.55	37		23.68	134		24.17	123		23.45	82		23.06	66		23.38	122			24.08	36		23.42	47		24.45	48		23.31	37		23.84	37		23.63	50			21.96	12		21.78	19		21.71	20		22.2	16
23.74	39		23.86	145		24.37	123		23.7	80		23.27	65		23.57	125			24.25	41		23.61	49		24.69	46		23.41	39		23.92	38		23.81	54			22.26	15		22.02	20		21.93	18		22.34	16
23.94	44		24.1	140		24.45	122		23.86	88		23.49	66		23.72	121			24.41	39		23.86	54		24.88	45		23.7	43		24.2	36		24.1	50			22.59	13		22.2	21		22.2	19		22.51	17
24.2	45		24.17	144		24.74	133		24.08	87		23.65	71		23.9	125			24.64	37		23.99	52		25.09	49		23.84	44		24.46	38		24.28	57			22.67	13		22.45	21		22.38	18		22.73	15
24.37	42		24.42	146		24.93	131		24.3	89		23.88	67		24.07	131			24.68	43		24.26	58		25.24	50		24.01	44		24.68	37		24.52	53			22.89	15		22.6	21		22.59	22		22.95	16
24.55	41		24.64	146		25.17	130		24.46	88		24.07	66		24.33	127			24.99	42		24.45	60		25.36	51		24.3	45		24.88	41		24.7	54			23.16	14		22.81	23		22.86	18		23.1	14
24.8	40		24.87	142		25.27	133		24.62	87		24.28	69		24.51	128			25.16	42		24.64	57		25.49	52		24.5	49		25.07	38		24.97	63			23.29	16		23	25		23.04	20		23.29	19
24.98	43		25.05	152		25.53	133		24.8	94		24.45	71		24.71	135			25.31	45		24.89	59		25.81	54		24.71	45		25.24	43		25.09	61			23.56	15		23.23	24		23.27	19		23.4	18
25.13	44		25.24	152		25.67	133		25.07	92		24.79	68		24.88	136			25.56	45		25.07	62		26.02	49		24.88	49		25.46	39		25.16	60			23.73	12		23.4	24		23.48	20		23.6	16
25.38	46		25.41	161		25.94	134		25.25	95		24.95	71		25.15	134			25.69	47		25.28	62		26.25	55		25.11	49		25.64	41		25.47	63			23.86	15		23.61	23		23.61	21		23.88	16
25.56	46		25.59	160		26.17	139		25.49	98		25.02	69		25.33	133			25.87	44		25.51	62		26.43	55		25.27	49		25.9	43		25.74	61			24.04	14		23.81	24		23.81	21		24.08	16
25.82	45		25.9	155		26.37	141		25.64	94		25.35	70		25.53	135			26.17	46		25.79	69		26.57	54		25.47	51		26.06	43		25.92	68			24.31	18		24.07	24		24.02	23		24.28	16
25.94	44		26.1	166		26.57	143		25.9	94		25.52	71		25.67	133			26.31	48		25.9	66		26.77	54		25.77	49		26.3	43		26.08	65			24.46	19		24.21	23		24.21	24		24.56	16
26.17	47		26.3	167		26.76	141		26.02	94		25.7	67		25.83	130			26.63	46		26.1	67		26.89	56		25.92	54		26.46	44		26.35	67			24.66	18		24.45	27		24.46	21		24.66	17
26.37	46		26.51	171		26.96	144		26.19	96		25.89	76		26.17	136			26.69	48		26.26	68		27.1	57		26.1	53		26.64	42		26.55	68			24.81	18		24.64	29		24.6	20		24.84	17
26.61	46		26.61	179		27.16	149		26.38	101		26.05	80		26.35	144			26.91	53		26.46	68		27.29	59		26.25	60		26.82	47		26.63	69			25.04	18		24.82	25		24.79	22		25.13	17
26.78	47		26.84	179		27.36	148		26.69	101		26.27	74		26.6	141			27.09	46		26.67	72		27.54	54		26.5	55		27.17	47		26.76	71			25.17	14		25.13	25		25	23		25.28	16
26.92	48		27.05	182		27.56	157		26.8	101		26.49	70		26.8	155			27.22	55		26.82	67		27.77	56		26.73	58		27.27	44		27.02	71			25.35	19		25.36	27		25.24	24		25.49	17
27.18	51		27.31	183		27.77	149		27.04	100		26.75	80		26.91	149			27.55	56		27.07	72		27.88	55		26.89	55		27.43	47		27.29	71			25.54	16		25.46	25		25.46	24		25.69	19
27.43	54		27.5	184		27.93	157		27.25	99		26.95	77		27.13	146			27.66	51		27.2	68		28.07	62		27.16	55		27.73	49		27.49	70			25.82	17		25.67	26		25.61	27		25.92	16
27.61	50		27.66	188		28.11	159		27.42	99		27.14	79		27.29	154			27.92	58		27.44	70		28.29	55		27.27	57		27.88	46		27.66	73			25.95	17		25.87	28		25.83	27		26.1	17
27.68	52		27.82	196		28.35	158		27.66	104		27.35	84		27.52	156			28.04	48		27.63	74		28.4	53		27.47	57		28.05	45		27.92	69			26.17	19		26.17	31		26.02	24		26.3	18
28.02	48		28.06	201		28.52	159		27.81	111		27.44	85		27.79	157			28.29	51		27.81	71		28.82	54		27.72	56		28.27	46		28.11	73			26.45	16		26.3	28		26.15	27		26.59	17
28.11	52		28.2	202		28.74	164		28.04	112		27.74	77		27.95	158			28.5	56		28.02	68		28.88	56		27.88	56		28.45	48		28.3	73			26.57	17		26.66	30		26.43	26		26.75	21
28.36	53		28.52	205		28.95	160		28.18	105		27.93	88		28.13	157			28.68	53		28.24	71		29.06	58		28.07	56		28.7	45		28.43	71			26.75	18		26.8	32		26.59	25		26.89	19
28.56	53		28.63	211		29.09	163		28.48	111		28.12	81		28.27	160			28.92	56		28.43	74		29.27	49		28.27	62		28.85	47		28.54	72			27.04	19		26.98	32		26.82	25		27.1	19
28.75	55		28.91	215		29.3	174		28.63	112		28.33	79		28.56	163			29.17	56		28.57	78		29.52	54		28.42	56		29.02	51		28.91	66			27.22	20		27.27	34		26.95	25		27.32	21
28.98	56		29.07	214		29.54	166		28.8	109		28.52	84		28.77	168			29.31	57		28.84	72		29.7	56		28.61	59		29.23	44		29.05	68			27.35	20		27.38	30		27.2	24		27.66	18
29.18	54		29.3	218		29.73	176		28.98	112		28.72	85		28.95	164			29.54	58		28.97	71		29.8	51		28.86	56		29.45	43		29.34	73			27.57	20		27.62	30		27.39	26		27.7	21
29.39	57		29.43	220		29.98	180		29.27	112		28.88	83		29.15	174			29.77	58		29.23	69		29.97	53		29	55		29.63	44		29.52	74			27.81	20		27.81	33		27.6	28		28.02	19
29.63	53		29.59	223		30.1	175		29.43	113		29.2	86		29.31	179			29.97	56		29.36	68		30.23	53		29.25	60		29.91	49		29.72	64			28.02	19		27.93	32		27.8	27		28.23	21
29.86	54		29.82	227		30.36	179		29.63	116		29.24	89		29.55	177			30.2	57		29.57	70		30.41	50		29.47	55		30.1	47		29.85	71			28.18	19		28.13	32		27.98	29		28.4	22
30	58		30.02	243		30.52	178		29.84	118		29.55	87		29.81	175			30.45	61		29.77	70		30.6	52		29.6	53		30.32	48		29.98	73			28.41	19		28.29	35		28.27	27		28.63	19
30.11	56		30.25	230		30.76	180		30.02	122		29.7	86		29.88	182			30.52	61		29.99	69		30.85	52		29.77	54		30.56	45		30.2	73			28.59	20		28.45	34		28.4	28		28.82	21
30.39	60		30.41	239		30.94	185		30.23	123		29.92	91		30.17	182			30.77	63		30.23	69		31.03	51		30.1	58		30.69	42		30.55	74			28.86	23		28.72	34		28.61	29		29.02	19
30.55	55		30.67	242		31.07	187		30.36	126		30.14	89		30.35	188			31	62		30.42	70		31.17	48		30.21	54		30.87	44		30.68	66			29.02	17		28.88	34		28.84	27		29.23	19
30.74	65		30.85	249		31.33	196		30.68	121		30.29	87		30.5	185			31.15	61		30.57	68		31.38	48		30.44	54		31.1	41		30.9	68			29.25	21		29.02	34		29.04	29		29.49	20
30.98	64		31.06	255		31.52	191		30.85	121		30.49	89		30.7	185			31.37	56		30.74	67		31.53	50		30.66	51		31.3	44		31.12	71			29.45	22		29.31	35		29.27	30		29.63	19
31.2	59		31.27	263		31.72	199		31.03	120		30.75	88		30.95	197			31.56	60		30.94	65		31.75	48		30.89	52		31.54	43		31.26	72			29.57	21		29.48	35		29.49	29		29.91	22
31.38	66		31.42	265		31.9	205		31.21	123		30.9	95		31.12	196			31.77	60		31.22	72		31.92	48		31.02	52		31.67	43		31.38	67			29.92	20		29.75	38		29.73	30		30.12	23
31.56	65		31.64	260		32.12	195		31.44	134		31.14	94		31.31	199			31.98	61		31.37	72		32.14	48		31.27	50		31.9	47		31.59	70			30.05	21		29.95	41		29.82	32		30.32	23
31.77	67		31.83	278		32.34	220		31.64	130		31.3	95		31.46	200			32.18	56		31.6	65		32.38	45		31.46	53		32.07	44		31.74	64			30.29	22		30.1	38		30.02	31		30.56	21
32.02	66		32.07	275		32.56	212		31.81	130		31.46	95		31.67	201			32.39	56		31.86	64		32.57	50		31.7	54		32.27	44		32.1	70			30.48	24		30.25	39		30.24	33		30.75	24
32.2	66		32.32	278		32.76	210		32.03	131		31.73	96		31.93	202			32.6	61		32.02	64		32.74	43		31.93	49		32.44	42		32.31	61			30.67	25		30.43	41		30.48	31		31.06	23
32.34	66		32.52	282		32.97	213		32.27	129		31.85	102		32.12	204			32.78	58		32.3	64		32.88	43		32.1	52		32.69	43		32.49	65			30.9	21		30.7	40		30.7	34		31.17	22
32.53	70		32.66	293		33.11	214		32.36	130		32.12	94		32.32	216			33.01	60		32.45	64		33.17	41		32.34	49		32.88	44		32.62	64			31.13	24		30.83	40		30.89	33		31.38	19
32.74	71		32.83	288		33.29	216		32.61	130		32.35	102		32.49	207			33.35	59		32.7	64		33.38	44		32.44	50		33.08	41		32.95	58			31.21	21		31.08	42		31.13	30		31.52	23
32.96	69		33.06	301		33.59	222		32.82	133		32.49	95		32.72	209			33.54	60		32.81	62		33.43	42		32.7	46		33.24	44		32.99	63			31.49	23		31.31	42		31.27	36		31.7	24
33.21	72		33.27	313		33.81	220		32.96	139		32.63	97		32.87	218			33.67	58		33.01	65		33.74	42		32.88	46		33.45	40		33.22	65			31.67	24		31.45	42		31.46	35		31.98	22
33.41	73		33.47	308		33.93	222		33.2	135		32.92	99		33.04	216			33.86	58		33.31	63		33.91	47		33.13	48		33.69	39		33.49	65			31.9	27		31.65	43		31.75	33		32.1	24
33.6	73		33.64	311		34.15	227		33.41	135		33.11	107		33.28	217			34.07	64		33.4	58		34.13	40		33.27	47		33.87	41		33.76	66			32.11	25		31.86	42		31.93	36		32.25	24
33.78	75		33.93	320		34.38	234		33.63	137		33.28	104		33.49	220			34.28	55		33.6	67		34.31	43		33.45	46		34.08	42		33.93	57			32.36	25		32.16	42		32.11	31		32.51	26
33.99	75		34.08	322		34.54	237		33.81	140		33.52	109		33.64	222			34.43	63		33.86	60		34.48	40		33.73	45		34.26	44		34.13	61			32.59	26		32.27	43		32.44	36		32.71	23
34.1	75		34.29	329		34.69	240		34.06	149		33.69	112		33.88	231			34.71	59		34.02	58		34.69	40		33.86	46		34.48	40		34.31	63			32.8	26		32.51	47		32.6	35		32.94	25
34.36	76		34.5	329		35.01	242		34.22	143		33.95	109		34.03	221			34.8	58		34.21	63		34.89	43		34.13	43		34.75	39		34.47	62			32.96	26		32.74	46		32.83	36		33.06	23
34.54	78		34.71	333		35.1	244		34.42	139		34.1	110		34.24	234			34.96	61		34.48	60		35.03	44		34.28	47		34.88	41		34.59	63			33.19	26		32.92	46		33.06	34		33.24	24
34.77	78		34.88	340		35.33	248		34.58	140		34.33	112		34.42	231			35.17	55		34.61	58		35.31	40		34.45	41		35.12	37		34.8	58			33.38	26		33.09	45		33.22	39		33.42	24
34.92	80		35.1	347		35.5	244		34.84	148		34.54	113		34.68	239			35.45	56		34.82	59		35.47	39		34.58	40		35.3	39		35.1	59			33.56	25		33.32	42		33.45	35		33.66	23
35.17	84		35.27	350		35.68	240		35.08	146		34.73	109		34.82	243			35.59	56		35.06	61		35.63	36		34.85	46		35.45	43		35.27	57			33.77	24		33.5	48		33.61	37		33.84	25
35.3	81		35.43	355		35.94	257		35.24	155		34.9	115		35.12	242			35.77	60		35.19	54		35.94	36		35.1	46		35.71	40		35.49	61			33.96	28		33.78	48		33.87	32		34.01	23
35.56	84		35.69	357		36.13	254		35.49	148		35.1	112		35.27	249			35.94	56		35.35	57		36.08	38		35.33	46		35.94	37		35.77	59			34.1	23		33.99	48		34.01	38		34.28	23
35.77	83		35.95	364		36.34	256		35.69	154		35.27	117		35.51	251			36.2	59		35.66	57		36.27	38		35.49	40		36.06	39		35.86	58			34.33	27		34.14	52		34.24	34		34.47	25
35.97	86		36.03	374		36.52	263		35.85	159		35.43	116		35.7	262			36.27	60		35.74	58		36.49	39		35.69	38		36.27	41		36.06	59			34.59	28		34.4	50		34.42	38		34.67	23
36.2	88		36.29	378		36.7	262		36.09	159		35.74	113		35.89	251			36.64	53		36.12	60		36.67	37		35.9	45		36.42	41		36.2	55			34.69	29		34.59	50		34.58	35		34.8	20
36.39	88		36.46	373		36.93	276		36.27	159		35.92	116		36.11	257			36.71	59		36.27	56		36.88	42		36.11	40		36.65	41		36.42	54			34.94	28		34.76	55		34.76	35		35.08	24
36.55	93		36.67	383		37.1	281		36.42	153		36.1	119		36.35	247			36.88	54		36.51	56		37.06	38		36.24	38		36.72	39		36.77	57			35.08	28		34.95	53		35.01	40		35.17	26
36.84	92		36.88	397		37.26	271		36.64	162		36.36	124		36.46	264			37.14	55		36.77	58		37.24	38		36.47	41		37.2	39		36.91	53			35.34	28		35.17	46		35.13	37		35.51	24
37.02	96		37.06	399		37.47	281		36.8	163		36.49	122		36.69	269			37.26	59		36.88	58		37.47	38		36.72	43		37.26	41		37.06	54			35.53	27		35.35	51		35.41	37		35.69	24
37.12	93		37.19	389		37.71	279		37.02	160		36.73	124		36.91	269			37.61	60		37.1	57		37.59	38		36.81	40		37.48	40		37.28	57			35.71	29		35.63	50		35.52	38		35.81	26
37.31	93		37.48	399		37.87	269		37.25	171		36.88	128		37.08	277			37.74	56		37.33	62		37.89	39		37.1	40		37.64	40		37.55	59			35.92	28		35.76	48		35.83	39		36.04	26
37.63	97		37.68	415		38.1	286		37.47	161		37.1	128		37.24	276			37.9	57		37.52	56		37.95	36		37.28	40		37.88	41		37.68	56			36.11	30		35.99	56		35.9	39		36.27	25
37.76	94		37.87	423		38.31	295		37.61	169		37.23	132		37.5	275			38.1	58		37.7	55		38.18	36		37.43	35		38.08	37		37.77	58			36.25	30		36.12	55		36.09	39		36.45	23
37.95	104		38.17	414		38.51	292		37.81	168		37.49	130		37.73	277			38.3	60		37.88	56		38.42	37		37.67	40		38.31	41		38	58			36.45	30		36.55	57		36.32	39		36.74	24
38.15	105		38.23	423		38.7	291		38.04	175		37.7	124		37.85	279			38.49	53		38.11	56		38.56	37		37.81	39		38.51	42		38.23	56			36.69	31		36.7	54		36.6	40		36.85	24
38.45	103		38.46	431		38.91	288		38.22	170		37.87	132		38.1	297			38.74	59		38.33	58		38.77	34		38.09	40		38.73	43		38.45	56			36.88	31		36.86	54		36.77	36		37.15	23
38.53	109		38.73	427		39.13	293		38.42	175		38.17	131		38.28	290			38.88	60		38.44	59		38.96	37		38.33	37		38.89	40		38.67	53			37.13	30		37.1	53		37.02	41		37.34	22
38.73	101		38.85	445		39.29	297		38.61	176		38.25	135		38.44	288			39.1	54		38.6	56		39.16	32		38.4	39		39.2	39		38.86	57			37.25	31		37.21	54		37.14	42		37.47	24
39.02	110		39.13	439		39.51	317		38.81	174		38.42	135		38.66	293			39.35	56		38.82	52		39.35	37		38.65	40		39.37	43		39.06	56			37.48	27		37.45	54		37.33	38		37.67	22
39.17	106		39.27	443		39.68	302		39.01	180		38.68	133		38.82	289			39.48	57		39.01	52		39.58	37		38.88	38		39.48	36		39.22	59			37.64	29		37.6	59		37.59	43		38.02	26
39.39	107		39.49	462		39.88	307		39.2	178		38.91	135		39.06	286			39.77	56		39.27	53		39.79	37		39.1	38		39.72	41		39.37	55			37.95	33		37.9	56		37.76	39		38.15	27
39.63	110		39.7	457		40.1	306		39.32	181		39.1	134		39.24	313			39.84	60		39.39	54		39.99	34		39.2	34		39.92	42		39.53	57			38.04	32		38.02	59		37.98	43		38.42	24
39.74	117		39.88	456		40.34	312		39.66	182		39.31	142		39.44	304			40.08	59		39.6	55		40.13	39		39.48	41		40.11	39		39.82	56			38.28	30		38.24	53		38.24	43		38.56	28
40	114		40.13	460		40.51	326		39.73	183		39.5	139		39.68	304			40.31	56		39.84	55		40.35	36		39.56	42		40.38	40		40.02	54			38.49	34		38.35	56		38.44	44		38.8	23
40.23	118		40.37	466		40.72	319		39.99	183		39.77	141		39.82	306			40.52	56		40.01	52		40.54	35		39.82	41		40.5	40		40.27	57			38.73	32		38.66	60		38.58	40		39	25
40.38	118		40.49	469		40.92	322		40.2	179		39.99	141		40.1	312			40.7	56		40.22	54		40.72	38		40.05	37		40.72	41		40.52	53			38.93	30		38.87	55		38.89	42		39.23	26
40.54	120		40.74	472		41.08	327		40.34	190		40.11	146		40.3	312			40.88	53		40.38	60		40.89	37		40.25	40		40.89	40		40.65	56			39.09	28		39.06	58		39.02	43		39.36	27
40.79	127		40.89	478		41.31	316		40.59	192		40.35	142		40.41	311			41.15	53		40.65	56		41.11	38		40.45	38		41.11	41		40.84	54			39.31	33		39.2	62		39.2	44		39.56	25
41.08	117		41.1	486		41.46	337		40.81	188		40.49	148		40.65	326			41.3	56		40.84	52		41.38	36		40.7	39		41.27	43		40.99	53			39.51	34		39.31	56		39.38	43		39.79	30
41.2	128		41.33	491		41.73	334		41.01	182		40.72	149		40.82	322			41.51	60		40.99	55		41.52	33		40.88	41		41.4	42		41.22	55			39.73	32		39.56	61		39.66	43		40.1	28
41.4	130		41.53	494		41.95	326		41.22	189		40.88	159		41.08	321			41.7	58		41.13	55		41.66	35		41.02	42		41.69	40		41.51	58			40	34		39.77	63		39.77	43		40.25	27
41.63	134		41.74	493		42.13	345		41.39	191		41.11	158		41.22	325			41.92	57		41.38	53		41.92	38		41.3	42		41.92	40		41.73	56			40.13	32		39.95	59		40.01	41		40.51	27
41.71	132		41.92	489		42.38	330		41.6	196		41.32	151		41.47	340			42.11	58		41.58	58		42.09	39		41.46	39		42.04	42		41.89	54			40.37	32		40.11	60		40.2	44		40.67	28
42.02	138		42.13	508		42.57	330		41.82	200		41.49	156		41.7	331			42.38	54		41.82	52		42.33	36		41.71	38		42.23	43		42.02	52			40.53	33		40.3	62		40.41	43		40.82	26
42.05	135		42.34	505		42.67	330		42.02	191		41.7	153		41.8	331			42.52	59		42.04	51		42.55	34		41.88	40		42.41	43		42.2	58			40.73	33		40.48	63		40.67	45		41.08	25
42.45	134		42.56	511		42.98	336		42.23	203		41.95	156		42.09	343			42.81	58		42.17	51		42.67	34		42.07	39		42.71	40		42.47	53			40.96	33		40.77	56		40.82	44		41.23	27
42.61	140		42.66	511		43.17	343		42.45	202		42.16	147		42.3	351			42.97	58		42.38	52		42.91	35		42.28	43		42.83	43		42.56	54			41.16	33		40.94	55		41.03	40		41.49	25
42.83	135		42.9	511		43.36	332		42.67	205		42.35	154		42.5	336			43.1	56		42.59	56		43.06	36		42.47	41		43.06	45		42.88	51			41.23	30		41.1	62		41.24	43		41.64	27
42.95	145		43.12	507		43.52	346		42.84	194		42.55	157		42.69	349			43.34	60		42.81	54		43.25	36		42.67	38		43.23	40		43.17	52			41.54	30		41.3	59		41.45	43		41.82	24
43.17	149		43.29	508		43.74	344		43.01	192		42.72	160		42.93	349			43.54	58		43	50		43.51	34		42.85	41		43.56	40		43.3	50			41.82	37		41.56	59		41.54	45		41.98	26
43.37	148		43.46	524		43.92	335		43.29	201		42.88	163		43.12	343			43.75	56		43.24	52		43.63	35		43.06	42		43.68	39		43.46	52			42.02	34		41.77	57		41.77	42		42.24	28
43.58	154		43.74	521		44.12	338		43.43	203		43.24	169		43.31	350			44.09	58		43.41	48		43.85	34		43.3	40		43.88	42		43.72	50			42.19	32		41.95	57		41.96	41		42.4	27
43.81	151		43.9	518		44.31	338		43.73	201		43.35	160		43.51	352			44.26	56		43.58	54		44.07	34		43.51	42		44.04	42		43.85	53			42.43	34		42.07	61		42.19	43		42.61	25
43.99	159		44.06	523		44.49	344		43.89	201		43.53	165		43.76	354			44.49	55		43.81	52		44.33	38		43.68	38		44.24	43		43.99	48			42.61	32		42.36	56		42.5	42		42.77	26
44.17	159		44.27	516		44.7	339		44.1	197		43.75	165		43.95	362			44.65	55		43.97	48		44.46	35		43.89	46		44.56	41		44.14	50			42.86	33		42.52	59		42.79	45		42.93	26
44.42	164		44.43	524		44.94	332		44.29	200		43.92	168		44.12	359			44.81	51		44.23	51		44.74	34		44.06	40		44.67	46		44.51	55			43.03	37		42.66	61		42.9	44		43.14	26
44.52	164		44.67	521		45.15	351		44.45	209		44.17	173		44.28	354			45.01	58		44.36	49		44.86	40		44.31	39		44.97	45		44.67	51			43.22	37		42.9	57		43.13	43		43.37	28
44.82	167		44.92	542		45.35	343		44.65	198		44.28	172		44.53	359			45.26	52		44.58	50		45.06	36		44.45	39		45.13	44		44.88	52			43.43	34		43.17	59		43.34	41		43.54	28
44.99	159		45.06	517		45.52	342		44.84	197		44.55	176		44.72	350			45.39	57		44.77	55		45.3	33		44.7	42		45.18	43		45.1	50			43.6	34		43.37	58		43.59	46		43.75	24
45.24	171		45.26	507		45.7	349		45.06	198		44.7	180		44.96	365			45.52	57		44.96	54		45.42	32		44.87	45		45.52	45		45.25	48			43.77	32		43.45	61		43.66	44		44.04	26
45.4	168		45.52	523		45.88	339		45.26	197		44.95	178		45.06	367			45.81	59		45.11	48		45.71	37		45.08	38		45.7	49		45.43	48			43.99	32		43.7	60		43.97	45		44.19	24
45.64	175		45.67	509		46.13	344		45.45	197		45.19	175		45.31	349			45.89	54		45.45	53		45.99	39		45.26	40		45.83	42		45.7	50			44.19	32		43.92	59		44.07	43		44.33	26
45.86	169		45.88	520		46.28	336		45.6	205		45.33	173		45.52	356			46.1	58		45.52	51		46.1	36		45.45	39		46.06	47		45.74	48			44.34	31		44.09	55		44.25	43		44.5	24
45.99	172		45.99	520		46.5	337		45.84	191		45.5	183		45.67	356			46.35	60		45.83	53		46.24	36		45.6	43		46.2	45		46.06	52			44.55	30		44.38	58		44.49	43		44.72	28
46.13	183		46.32	506		46.7	332		45.96	201		45.76	178		45.92	361			46.55	55		46.06	48		46.45	39		45.88	39		46.6	44		46.24	49			44.67	32		44.58	54		44.64	43		44.92	27
46.37	177		46.49	502		46.88	324		46.23	197		45.94	179		46.15	346			46.74	57		46.25	47		46.64	32		46.1	38		46.81	42		46.48	47			44.93	34		44.79	56		44.74	44		45.11	27
46.62	184		46.67	513		47.08	333		46.42	195		46.2	181		46.3	349			46.93	56		46.4	51		46.93	39		46.22	44		46.87	46		46.65	47			45.02	33		45.01	57		45.08	40		45.33	24
46.89	182		46.87	512		47.31	327		46.57	193		46.31	190		46.45	353			47.11	55		46.69	47		47.11	33		46.42	43		47.08	48		46.86	52			45.31	33		45.2	58		45.23	43		45.52	26
47.02	182		47.1	515		47.52	330		46.81	196		46.52	184		46.69	350			47.34	52		46.85	50		47.34	39		46.67	40		47.27	50		47.1	55			45.48	30		45.35	59		45.42	43		45.77	26
47.08	180		47.27	505		47.66	331		47.06	193		46.67	178		46.91	347			47.55	54		46.99	51		47.42	37		46.81	42		47.42	48		47.23	49			45.71	32		45.52	57		45.67	41		45.88	25
47.4	188		47.56	493		47.92	325		47.25	203		46.88	180		47.08	347			47.74	55		47.31	46		47.66	35		47.1	43		47.65	42		47.29	48			45.93	32		45.79	63		45.86	37		46.16	28
47.6	196		47.7	500		48.06	330		47.34	188		47.06	186		47.2	354			47.92	54		47.52	48		47.84	38		47.24	42		47.87	47		47.67	47			46.1	32		45.99	54		46.06	42		46.42	25
47.79	188		47.95	489		48.37	316		47.6	195		47.33	184		47.49	347			48.16	54		47.7	47		48.06	36		47.43	43		48.18	48		47.88	46			46.26	32		46.25	60		46.24	41		46.63	26
47.96	193		48.18	473		48.52	313		47.73	182		47.52	180		47.74	349			48.31	50		47.84	49		48.19	37		47.7	45		48.35	50		48.05	47			46.47	32		46.48	55		46.43	41		46.81	23
48.2	189		48.39	492		48.8	315		47.97	195		47.7	187		47.82	346			48.49	52		48.02	46		48.35	36		47.88	44		48.45	45		48.33	47			46.74	31		46.67	52		46.64	40		46.99	25
48.34	205		48.58	484		48.88	318		48.21	193		47.9	191		48.11	334			48.66	55		48.27	49		48.59	35		48.07	41		48.66	52		48.51	48			46.94	32		46.86	59		46.85	42		47.23	25
48.52	200		48.73	489		49.1	313		48.46	185		48.07	188		48.24	340			48.9	54		48.5	53		48.77	38		48.29	41		48.84	47		48.69	44			47.08	31		47.11	57		46.93	40		47.41	25
48.83	204		48.9	484		49.31	294		48.63	186		48.31	186		48.48	334			49.06	55		48.66	49		49	36		48.46	43		49.02	47		48.91	52			47.29	28		47.26	51		47.23	38		47.6	25
48.88	201		49.11	472		49.5	293		48.82	178		48.5	189		48.74	336			49.17	56		48.91	46		49.22	35		48.63	46		49.22	49		48.93	43			47.48	32		47.42	56		47.45	41		47.8	27
49.18	211		49.25	471		49.65	287		49.02	185		48.77	194		48.86	327			49.5	54		49.11	51		49.45	40		48.85	42		49.38	45		49.2	45			47.79	28		47.63	54		47.62	39		47.92	25
49.31	211		49.49	470		49.88	295		49.2	178		48.97	196		49.07	334			49.67	56		49.29	47		49.59	38		49.02	41		49.7	48		49.4	47			47.88	32		47.89	51		47.79	42		48.13	24
49.52	211		49.67	466		50.09	289		49.35	172		49.05	198		49.2	329			49.84	56		49.48	45		49.8	34		49.23	44		49.92	48		49.63	47			48.17	30		48.02	51		47.94	39		48.31	27
49.69	213		49.8	452		50.31	281		49.57	175		49.32	197		49.49	332			50.06	53		49.67	50		49.99	36		49.4	46		49.96	47		49.82	51			48.34	32		48.2	49		48.18	37		48.54	24
49.92	211		50.04	445		50.46	283		49.77	173		49.49	199		49.67	337			50.24	53		49.86	45		50.22	37		49.61	45		50.15	49		50.06	48			48.56	30		48.42	56		48.43	42		48.73	24
50.12	215		50.26	437		50.66	283		49.95	167		49.64	202		49.84	327			50.42	54		50.03	49		50.37	39		49.85	44		50.41	49		50.19	47			48.73	30		48.6	52		48.61	41		49	24
50.36	216		50.52	435		50.95	277		50.12	163		49.77	206		49.99	313			50.7	51		50.17	45		50.59	36		50.03	41		50.58	50		50.37	45			48.97	30		48.9	48		48.81	38		49.15	23
50.6	220		50.68	430		51.17	270		50.36	175		50.06	196		50.2	321			50.86	57		50.41	47		50.79	39		50.31	43		50.76	47		50.52	48			49.13	28		49.02	48		49.05	37		49.34	26
50.82	223		50.86	436		51.31	260		50.56	167		50.26	204		50.37	313			51	48		50.58	47		50.92	37		50.52	46		51.11	50		50.81	46			49.34	28		49.22	46		49.22	37		49.52	26
50.99	214		51.12	421		51.52	265		50.74	159		50.45	201		50.59	315			51.2	50		50.76	47		51.17	40		50.71	46		51.31	50		51.09	46			49.56	31		49.36	52		49.42	35		49.77	25
51.2	221		51.33	419		51.68	263		51	163		50.64	200		50.78	305			51.44	58		50.92	44		51.34	43		50.92	44		51.51	51		51.35	48			49.81	28		49.52	50		49.65	37		49.99	23
51.42	225		51.49	404		51.84	261		51.24	157		50.86	202		51.08	306			51.68	55		51.2	48		51.49	38		51.11	47		51.68	51		51.6	43			49.92	30		49.77	50		49.79	37		50.33	24
51.56	224		51.69	406		52.05	260		51.44	158		51.06	203		51.23	308			51.81	51		51.36	41		51.71	39		51.24	43		51.86	53		51.74	44			50.12	32		50.02	44		50.03	37		50.59	25
51.75	232		51.88	400		52.26	256		51.61	158		51.29	204		51.49	303			51.99	50		51.53	46		51.94	41		51.42	49		52.06	52		51.87	45			50.36	32		50.1	48		50.21	34		50.76	21
51.99	235		52.01	399		52.46	243		51.85	160		51.54	205		51.73	306			52.31	52		51.81	45		52.23	40		51.69	48		52.18	46		52.11	41			50.54	30		50.36	43		50.46	39		50.89	23
52.12	227		52.24	391		52.54	239		51.95	159		51.74	197		51.81	290			52.49	48		51.96	42		52.35	37		51.81	46		52.36	46		52.34	46			50.74	29		50.51	44		50.62	38		51.08	24
52.29	217		52.46	376		52.75	240		52.2	153		51.87	210		52.13	294			52.61	49		52.14	49		52.56	39		51.98	49		52.63	52		52.53	45			50.98	32		50.69	48		50.77	31		51.31	23
52.45	238		52.67	383		53.03	237		52.38	153		52.14	203		52.24	291			52.81	48		52.38	43		52.68	43		52.18	47		52.93	49		52.71	42			51.16	31		50.89	42		50.98	35		51.47	24
52.7	223		52.81	369		53.15	233		52.6	146		52.29	197		52.46	290			53.04	49		52.51	47		52.95	39		52.42	50		53.13	46		52.89	45			51.45	29		51.09	42		51.23	35		51.7	22
52.93	236		53.09	376		53.46	223		52.84	151		52.52	205		52.61	284			53.29	44		52.81	43		53.13	39		52.6	51		53.2	51		53.03	41			51.6	30		51.29	50		51.45	35		51.87	25
53.06	227		53.24	360		53.61	222		52.94	149		52.63	207		52.8	285			53.48	46		53.01	47		53.36	38		52.84	48		53.38	48		53.29	42			51.86	25		51.52	43		51.7	34		52.06	27
53.34	233		53.44	357		53.88	212		53.17	143		52.89	205		53.06	274			53.66	46		53.2	47		53.54	44		53.09	49		53.56	51		53.44	42			52.02	28		51.7	46		51.85	34		52.27	22
53.52	232		53.71	345		54.04	212		53.44	139		53.04	208		53.22	274			53.79	43		53.37	46		53.7	40		53.22	45		53.81	51		53.6	41			52.27	28		51.99	46		52.03	34		52.42	24
53.77	234		53.85	339		54.18	221		53.57	139		53.24	201		53.43	266			54.07	43		53.52	45		53.89	42		53.37	48		54	47		53.77	41			52.45	24		52.09	43		52.23	34		52.6	22
53.95	238		53.99	336		54.38	207		53.81	134		53.52	205		53.59	266			54.27	45		53.77	41		54.12	40		53.66	48		54.35	44		54.06	41			52.64	29		52.28	43		52.51	34		52.81	23
54.14	235		54.2	332		54.68	207		54.02	137		53.67	199		53.81	269			54.45	43		53.92	40		54.35	39		53.88	49		54.47	45		54.2	38			52.75	27		52.49	41		52.7	33		52.96	23
54.35	238		54.47	335		54.88	199		54.2	136		53.9	201		54.05	260			54.6	42		54.16	42		54.5	41		54.09	52		54.72	43		54.37	36			52.95	25		52.73	40		53.04	32		53.19	23
54.51	227		54.7	326		55.02	199		54.37	129		54.12	217		54.18	255			54.98	41		54.35	41		54.68	40		54.27	52		54.83	41		54.62	42			53.22	26		52.92	42		53.19	32		53.41	21
54.77	231		54.88	318		55.22	190		54.58	132		54.2	215		54.38	255			55.2	36		54.58	40		54.92	36		54.49	51		55.02	47		54.77	38			53.38	28		53.19	41		53.33	29		53.59	23
54.95	233		55.1	317		55.46	188		54.81	131		54.5	204		54.6	252			55.39	35		54.75	43		55.15	40		54.66	52		55.22	46		54.98	32			53.67	26		53.35	40		53.61	31		53.79	22
55.15	226		55.24	308		55.62	188		54.94	126		54.77	209		54.82	247			55.64	39		54.95	44		55.31	39		54.81	54		55.43	43		55.16	36			53.81	25		53.46	39		53.76	32		54.02	22
55.36	239		55.48	307		55.85	187		55.19	126		54.9	204		55.06	245			55.72	36		55.13	45		55.48	43		55.03	52		55.57	41		55.38	36			54.02	27		53.85	41		53.97	30		54.16	24
55.62	228		55.6	290		56.02	181		55.36	121		55.15	202		55.27	238			56	35		55.31	42		55.74	44		55.24	51		55.95	46		55.59	38			54.23	26		53.97	36		54.17	32		54.35	22
55.79	224		55.83	288		56.23	184		55.61	128		55.33	210		55.46	234			56.21	33		55.57	42		55.89	41		55.41	51		56.05	43		55.72	36			54.38	25		54.13	35		54.29	28		54.6	21
55.95	226		56.07	283		56.41	179		55.81	123		55.49	205		55.6	237			56.38	33		55.74	40		56.1	41		55.6	47		56.28	44		56.02	34			54.57	25		54.49	35		54.53	32		54.77	22
56.13	229		56.26	275		56.6	173		55.92	119		55.76	205		55.83	224			56.6	32		55.95	40		56.23	42		55.79	49		56.4	43		56.21	34			54.8	25		54.6	39		54.73	34		54.88	23
56.38	219		56.45	274		56.77	173		56.13	119		55.89	205		55.95	226			56.66	30		56.14	41		56.5	41		56	53		56.54	44		56.38	32			54.94	21		54.79	36		54.88	31		55.11	23
56.48	223		56.56	268		57.02	167		56.4	110		56.05	201		56.15	223			56.95	33		56.25	42		56.63	41		56.25	48		56.82	43		56.56	31			55.19	22		54.96	35		55.07	30		55.42	23
56.72	221		56.87	277		57.2	163		56.59	118		56.27	201		56.42	220			57.17	32		56.51	44		56.79	40		56.4	47		56.94	45		56.76	32			55.35	25		55.24	34		55.22	29		55.57	21
56.92	213		57.05	259		57.44	158		56.72	114		56.41	205		56.67	215			57.28	32		56.81	43		57.1	45		56.6	46		57.14	41		57.04	39			55.52	25		55.35	34		55.49	30		55.76	23
57.13	218		57.26	260		57.61	156		57	116		56.69	201		56.87	220			57.5	31		56.9	40		57.28	45		56.82	48		57.42	42		57.18	36			55.71	24		55.52	32		55.64	33		55.92	21
57.32	217		57.42	248		57.77	151		57.22	112		56.87	202		56.98	196			57.66	29		57.14	42		57.49	45		57.02	52		57.66	43		57.35	32			55.98	21		55.79	36		55.83	28		56.12	22
57.49	197		57.56	251		57.99	152		57.42	110		57.02	197		57.23	207			57.88	31		57.35	42		57.67	44		57.2	52		57.88	43		57.62	32			56.09	22		56.05	36		56.05	29		56.38	23
57.71	211		57.81	245		58.25	148		57.49	108		57.25	200		57.43	206			58.07	26		57.45	42		57.88	43		57.4	50		57.95	39		57.78	34			56.32	23		56.25	34		56.26	32		56.56	23
57.92	207		57.97	236		58.45	149		57.81	109		57.42	198		57.6	198			58.2	28		57.72	43		58.05	45		57.59	52		58.18	43		57.97	34			56.45	23		56.4	31		56.38	30		56.71	22
58.1	203		58.22	228		58.63	148		57.95	110		57.64	194		57.71	195			58.4	31		57.9	44		58.27	45		57.77	53		58.26	44		58.2	35			56.64	23		56.63	34		56.59	27		57	21
58.3	202		58.36	220		58.84	146		58.15	109		57.89	195		58.04	198			58.58	27		58.12	40		58.49	46		57.97	52		58.54	37		58.34	33			56.9	21		56.88	32		56.87	29		57.16	21
58.45	198		58.64	204		59.1	140		58.42	105		58.02	193		58.2	191			58.81	31		58.49	43		58.7	45		58.2	54		58.72	42		58.56	34			57.02	25		57.05	32		56.99	28		57.3	19
58.79	191		58.85	215		59.2	139		58.56	97		58.2	190		58.44	183			59.06	29		58.6	45		58.89	46		58.38	50		59	42		58.77	32			57.26	22		57.26	32		57.18	30		57.62	22
58.88	185		58.95	197		59.41	128		58.74	106		58.46	188		58.56	181			59.2	30		58.81	45		59.15	43		58.6	51		59.24	43		59.03	36			57.46	19		57.4	32		57.36	30		57.79	22
59.13	187		59.2	200		59.61	133		58.95	104		58.62	184		58.77	176			59.38	29		58.99	46		59.23	47		58.79	55		59.44	41		59.2	32			57.68	20		57.6	33		57.59	28		57.98	20
59.31	186		59.36	192		59.8	130		59.17	102		58.82	191		58.94	174			59.62	29		59.2	43		59.45	47		59.02	56		59.52	42		59.39	34			57.87	19		57.77	31		57.81	31		58.2	22
59.46	176		59.55	188		59.99	125		59.33	93		59.15	183		59.2	175			59.74	28		59.52	40		59.63	46		59.2	57		59.73	46		59.59	32			58.07	17		57.99	33		58.07	28		58.38	24
59.7	185		59.8	187		60.2	122		59.52	98		59.21	189		59.39	170			60.02	29		59.62	47		59.86	49		59.39	56		59.98	44		59.83	31			58.31	19		58.16	27		58.16	28		58.56	21
59.93	174		60	172		60.39	121		59.72	96		59.41	183		59.59	172			60.24	28		59.81	47		60.03	47		59.62	57		60.17	42		59.98	35			58.49	17		58.31	30		58.4	30		58.79	21
60.09	170		60.24	166		60.61	119		59.9	93		59.67	177		59.77	163			60.39	25		60.09	47		60.24	45		59.86	58		60.42	42		60.22	35			58.69	18		58.53	30		58.59	29		59.02	22
60.35	169		60.39	166		60.79	118		60.17	95		59.81	180		59.95	162			60.63	31		60.24	43		60.45	52		60	55		60.69	47		60.37	32			58.94	15		58.74	31		58.82	26		59.17	24
60.5	159		60.65	170		61	117		60.38	98		60.09	183		60.17	154			60.83	28		60.42	46		60.63	46		60.14	57		60.81	42		60.6	35			59.1	19		58.89	27		58.97	25		59.35	22
60.68	160		60.83	159		61.16	114		60.56	93		60.24	186		60.4	151			61.02	26		60.66	45		60.79	49		60.39	60		61.05	46		60.81	34			59.34	14		59.13	31		59.2	25		59.64	24
60.93	157		60.99	159		61.42	113		60.69	91		60.45	172		60.53	155			61.17	26		60.81	52		61.04	49		60.58	61		61.16	44		60.96	31			59.49	17		59.36	27		59.38	25		59.8	18
61.1	152		61.25	154		61.55	111		60.93	89		60.73	178		60.78	149			61.36	26		61.02	49		61.2	52		60.81	56		61.39	44		61.16	33			59.75	15		59.46	27		59.55	25		60.03	21
61.34	147		61.38	146		61.73	106		61.14	95		60.86	179		61.02	141			61.61	26		61.15	49		61.39	53		61.02	63		61.59	43		61.39	32			59.94	15		59.77	26		59.85	24		60.27	22
61.56	141		61.67	140		62.06	104		61.34	89		61.08	170		61.1	138			61.8	27		61.37	52		61.6	51		61.23	63		61.72	41		61.56	32			60.19	15		59.92	28		59.94	31		60.5	22
61.65	137		61.85	144		62.25	103		61.6	85		61.25	182		61.36	137			61.98	26		61.57	48		61.78	51		61.35	59		62	44		61.78	36			60.3	15		60.13	27		60.19	27		60.73	20
61.92	125		62.11	140		62.43	107		61.73	87		61.51	171		61.53	134			62.17	25		61.67	47		62.03	50		61.55	60		62.27	44		61.96	31			60.49	15		60.3	23		60.4	25		60.89	22
62.12	132		62.27	134		62.66	100		61.96	81		61.69	168		61.8	135			62.37	28		61.91	50		62.23	53		61.8	62		62.35	47		62.15	33			60.73	14		60.52	26		60.65	29		61.06	22
62.31	128		62.5	129		62.81	94		62.2	83		61.82	166		62.06	131			62.58	27		62.17	51		62.42	51		61.99	63		62.64	44		62.38	39			61.02	13		60.67	24		60.86	27		61.26	18
62.52	125		62.64	123		63.05	98		62.31	88		62.03	171		62.17	126			62.8	27		62.35	48		62.59	52		62.17	60		62.77	47		62.56	32			61.18	16		60.94	26		61	25		61.45	22
62.72	123		62.81	116		63.27	93		62.5	82		62.3	155		62.38	132			62.98	23		62.52	54		62.82	52		62.37	59		62.95	44		62.77	32			61.39	14		61.17	27		61.25	27		61.67	20
62.84	123		63	123		63.48	91		62.77	75		62.49	165		62.63	124			63.18	24		62.74	50		62.96	57		62.53	64		63.13	46		62.99	36			61.65	14		61.32	25		61.43	27		61.88	22
63.09	107		63.2	113		63.63	89		62.9	77		62.67	166		62.77	124			63.39	25		62.88	54		63.22	56		62.84	61		63.35	42		63.18	36			61.85	14		61.55	28		61.63	25		62.1	19
63.32	103		63.48	113		63.85	96		63.11	80		62.85	166		62.98	118			63.58	26		63.18	54		63.37	54		63	61		63.6	48		63.31	32			62.09	15		61.7	25		61.9	24		62.27	19
63.51	104		63.53	102		64	85		63.33	81		63.08	163		63.11	111			63.79	23		63.37	52		63.61	56		63.21	63		63.77	48		63.56	37			62.22	12		61.95	23		62.02	25		62.41	19
63.68	105		63.77	102		64.24	85		63.5	77		63.2	165		63.41	116			64.01	27		63.55	54		63.81	53		63.35	67		63.99	50		63.71	33			62.42	13		62.22	25		62.25	27		62.59	20
63.8	106		64.01	97		64.39	82		63.79	80		63.5	156		63.52	115			64.2	26		63.72	55		63.99	59		63.55	60		64.19	51		63.97	34			62.59	12		62.35	23		62.56	26		62.81	20
64	95		64.29	95		64.56	85		63.87	76		63.67	162		63.77	110			64.43	26		63.92	52		64.24	60		63.72	61		64.32	44		64.17	37			62.82	14		62.45	24		62.76	26		62.95	21
64.26	94		64.38	94		64.8	80		64.06	72		63.77	154		63.9	104			64.59	25		64.04	55		64.34	62		64.03	64		64.58	49		64.35	35			63.01	11		62.72	22		62.98	24		63.18	20
64.45	94		64.56	87		64.96	83		64.24	68		64.06	151		64.13	108			64.79	26		64.22	57		64.67	59		64.19	63		64.69	50		64.52	34			63.19	12		62.85	23		63.13	25		63.4	19
64.63	91		64.77	86		65.25	84		64.54	75		64.2	160		64.37	102			64.96	27		64.46	55		64.81	54		64.37	64		64.88	46		64.77	35			63.4	14		63.11	22		63.25	25		63.63	21
64.82	86		64.92	81		65.41	77		64.72	73		64.41	149		64.56	100			65.2	27		64.69	55		64.95	64		64.59	68		65.17	49		64.96	37			63.52	13		63.3	23		63.59	22		63.77	17
65.01	89		65.17	84		65.49	77		64.9	70		64.69	155		64.7	102			65.35	27		64.85	62		65.17	60		64.77	69		65.4	47		65.14	36			63.77	13		63.52	25		63.79	26		64.02	20
65.27	83		65.35	82		65.78	75		65.06	71		64.91	157		65.01	100			65.69	24		65.08	54		65.35	66		64.99	67		65.59	52		65.38	39			63.95	12		63.74	22		63.9	23		64.11	18
65.5	77		65.56	79		66.01	69		65.37	66		65.04	153		65.12	102			65.91	26		65.3	61		65.59	62		65.16	71		65.8	50		65.56	40			64.09	13		63.88	21		64.13	24		64.27	19
65.7	76		65.78	76		66.17	74		65.52	74		65.24	148		65.35	93			66.17	29		65.5	63		65.81	61		65.37	72		65.92	56		65.7	41			64.26	12		64.12	21		64.29	25		64.51	19
65.82	74		65.9	71		66.37	70		65.67	67		65.32	141		65.56	90			66.35	30		65.65	62		65.93	67		65.63	71		66.1	49		66.02	39			64.45	9		64.35	21		64.46	27		64.7	19
66.05	72		66.2	70		66.52	69		65.92	66		65.6	145		65.7	91			66.52	29		65.94	66		66.2	64		65.74	71		66.26	56		66.1	38			64.69	14		64.5	23		64.68	25		64.9	20
66.27	73		66.3	69		66.69	67		66.1	70		65.81	147		65.97	89			66.66	29		66.12	63		66.45	68		65.96	70		66.47	53		66.31	42			64.85	12		64.74	20		64.88	25		65.16	18
66.49	66		66.54	66		66.94	68		66.33	69		66.06	144		66.15	87			66.87	25		66.23	63		66.55	68		66.18	76		66.78	57		66.56	40			65.06	12		64.95	22		65.08	24		65.25	19
66.62	62		66.78	69		67.1	70		66.57	68		66.23	140		66.38	86			67.11	29		66.42	67		66.77	69		66.34	75		67.04	56		66.76	43			65.29	11		65.19	22		65.14	24		65.52	20
66.9	61		67	61		67.32	62		66.69	62		66.38	140		66.52	83			67.27	28		66.69	64		67	69		66.52	71		67.14	51		66.9	37			65.46	12		65.29	20		65.46	24		65.69	17
67.11	64		67.18	64		67.61	65		66.94	63		66.66	136		66.69	82			67.52	30		66.85	66		67.16	71		66.76	83		67.43	58		67.13	41			65.72	10		65.43	24		65.63	23		65.96	20
67.27	63		67.35	58		67.74	64		67.13	65		66.82	134		66.96	81			67.64	27		67.06	67		67.34	72		67.02	79		67.45	58		67.35	41			65.92	12		65.86	21		65.82	24		66.1	17
67.46	59		67.6	57		67.92	64		67.3	67		66.98	134		67.04	83			67.89	29		67.24	70		67.54	71		67.08	75		67.7	57		67.58	38			66.04	11		66.02	21		66.02	21		66.38	19
67.74	60		67.79	55		68.15	58		67.51	65		67.19	132		67.27	77			67.97	28		67.46	70		67.77	71		67.31	81		67.93	55		67.72	43			66.3	11		66.17	21		66.13	24		66.58	18
67.85	57		67.99	53		68.36	62		67.74	64		67.48	131		67.51	79			68.26	28		67.71	73		67.97	75		67.63	82		68.18	57		67.92	40			66.46	13		66.44	22		66.38	25		66.77	20
67.97	54		68.2	54		68.66	64		67.86	63		67.6	133		67.74	86			68.47	33		67.95	76		68.12	77		67.75	79		68.36	61		68.12	44			66.64	11		66.68	19		66.62	24		66.97	19
68.24	51		68.42	52		68.76	62		68.05	63		67.79	129		67.85	82			68.7	31		68.13	76		68.31	78		68.06	83		68.58	62		68.35	47			66.95	11		66.81	21		66.77	25		67.16	19
68.47	56		68.56	52		68.95	58		68.27	55		67.96	130		68.09	76			68.77	29		68.31	72		68.58	78		68.12	83		68.81	62		68.52	43			67.06	13		66.96	20		66.98	25		67.4	19
68.7	52		68.74	50		69.12	56		68.47	63		68.09	127		68.31	81			68.99	31		68.55	77		68.74	83		68.39	85		69.01	61		68.7	45			67.24	13		67.16	20		67.13	24		67.56	18
68.87	51		68.98	51		69.35	58		68.69	59		68.38	132		68.54	77			69.2	32		68.76	74		69.01	86		68.52	87		69.11	67		68.9	50			67.49	12		67.32	19		67.4	21		67.74	20
69.06	50		69.17	47		69.52	57		68.92	59		68.63	131		68.7	74			69.32	31		68.9	79		69.15	82		68.8	89		69.35	62		69.17	49			67.69	11		67.51	22		67.59	21		67.97	19
69.27	47		69.37	47		69.74	54		69.12	57		68.77	127		68.99	73			69.57	32		69.07	85		69.32	79		68.99	90		69.52	65		69.42	49			67.93	10		67.82	21		67.75	24		68.17	17
69.5	47		69.55	48		69.97	62		69.25	57		68.95	123		69.15	72			69.8	34		69.3	71		69.62	87		69.2	84		69.77	63		69.54	50			68.06	13		67.89	20		67.89	24		68.38	19
69.63	49		69.75	47		70.14	58		69.49	56		69.24	125		69.32	76			69.97	33		69.58	87		69.79	92		69.33	90		69.95	70		69.7	47			68.24	13		68.15	20		68.21	21		68.55	17
69.87	46		69.95	46		70.39	54		69.77	56		69.39	121		69.55	72			70.09	33		69.77	86		69.92	85		69.48	95		70.18	67		69.88	50			68.46	14		68.38	22		68.35	24		68.77	22
70.09	46		70.17	43		70.61	57		69.87	54		69.62	120		69.73	74			70.28	32		69.99	83		70.09	89		69.75	91		70.38	70		70.15	51			68.68	11		68.57	22		68.62	23		68.97	21
70.23	51		70.41	42		70.74	54		70.13	50		69.87	117		69.92	69			70.52	36		70.14	81		70.26	91		69.95	96		70.47	69		70.3	49			68.89	10		68.74	22		68.71	22		69.2	18
70.44	45		70.56	40		70.94	55		70.22	56		70.06	117		70.1	69			70.74	36		70.35	89		70.53	98		70.12	93		70.63	69		70.49	48			69.11	11		68.98	20		68.93	20		69.33	19
70.65	42		70.79	42		71.17	54		70.39	52		70.22	116		70.25	70			70.9	33		70.63	87		70.77	91		70.28	98		70.88	70		70.74	53			69.25	10		69.09	21		69.12	22		69.52	19
70.82	44		70.96	43		71.34	54		70.7	56		70.46	115		70.49	71			71.09	36		70.76	89		70.88	96		70.57	100		71.02	74		70.92	56			69.54	13		69.24	20		69.31	21		69.82	21
71.06	42		71.24	44		71.61	58		70.86	52		70.6	122		70.74	67			71.29	35		70.98	92		71.13	95		70.76	103		71.39	75		71.11	48			69.77	14		69.49	20		69.63	23		69.89	19
71.22	39		71.36	40		71.77	53		71.12	51		70.86	114		70.88	71			71.49	33		71.14	91		71.31	94		70.95	110		71.52	71		71.32	53			69.83	13		69.67	22		69.77	21		70.2	18
71.44	40		71.63	41		71.96	56		71.23	51		71.04	117		71.04	74			71.72	34		71.32	90		71.47	102		71.19	101		71.77	78		71.47	51			70.03	11		69.9	21		69.95	26		70.45	17
71.61	36		71.85	40		72.15	53		71.46	50		71.27	108		71.31	69			71.91	37		71.58	92		71.72	98		71.27	105		71.92	76		71.67	57			70.31	13		70.02	20		70.2	22		70.6	21
71.85	35		71.99	38		72.28	55		71.71	47		71.42	110		71.47	69			72.1	38		71.74	100		71.93	109		71.56	106		72.13	79		71.9	58			70.51	11		70.31	22		70.38	23		70.8	19
71.99	41		72.19	39		72.51	55		71.85	47		71.67	107		71.67	72			72.27	35		71.91	95		72.11	102		71.72	100		72.2	83		72.06	58			70.85	11		70.49	23		70.67	24		70.98	20
72.28	41		72.41	38		72.73	54		72.03	47		71.85	109		71.91	66			72.52	37		72.13	101		72.29	108		71.91	112		72.48	79		72.27	54			71.01	12		70.7	21		70.74	24		71.19	20
72.44	37		72.51	37		72.9	57		72.21	50		72.1	106		72.03	67			72.69	40		72.28	96		72.49	106		72.18	106		72.67	82		72.51	56			71.23	14		70.84	22		71.06	22		71.44	19
72.54	34		72.73	39		73.13	54		72.45	48		72.21	102		72.31	70			72.92	39		72.49	101		72.77	103		72.34	118		72.97	81		72.63	58			71.37	14		71.11	21		71.17	25		71.6	21
72.81	37		72.95	39		73.38	61		72.63	47		72.4	101		72.44	72			73.1	42		72.65	106		72.92	108		72.54	115		73.13	82		72.92	61			71.58	13		71.27	19		71.34	22		71.78	18
73.03	36		73.17	35		73.52	58		72.86	49		72.61	98		72.7	70			73.31	42		72.92	111		73.17	111		72.73	112		73.38	91		73.11	58			71.78	13		71.5	22		71.63	25		72.02	19
73.17	37		73.38	33		73.74	53		73	49		72.77	102		72.87	71			73.54	42		73.13	104		73.28	116		72.95	116		73.55	84		73.3	67			71.93	15		71.65	21		71.81	22		72.23	20
73.44	36		73.49	36		73.85	56		73.22	48		73	102		73.15	75			73.72	43		73.27	107		73.47	119		73.13	121		73.71	90		73.51	69			72.15	13		71.85	24		71.99	24		72.38	19
73.68	37		73.69	37		74.1	56		73.45	51		73.2	100		73.3	68			73.96	44		73.38	115		73.74	119		73.31	120		73.8	91		73.7	67			72.37	14		72.08	22		72.16	28		72.54	20
73.85	35		73.92	36		74.32	56		73.7	47		73.41	95		73.49	74			74.15	43		73.64	106		73.92	126		73.56	126		74.04	86		73.93	67			72.57	12		72.32	21		72.48	23		72.79	19
74.02	34		74.19	35		74.45	56		73.82	47		73.52	91		73.67	74			74.32	44		73.93	114		74.07	120		73.74	127		74.25	89		74.12	67			72.81	14		72.49	23		72.64	23		72.94	20
74.19	33		74.31	35		74.72	51		74.04	49		73.77	97		73.87	77			74.49	42		74.02	120		74.35	127		73.93	128		74.59	90		74.31	70			72.92	14		72.59	22		72.89	23		73.17	18
74.4	36		74.56	37		74.93	57		74.25	49		73.99	94		74.05	69			74.74	45		74.17	114		74.46	126		74.13	126		74.71	88		74.52	68			73.09	17		72.88	24		73.09	24		73.31	19
74.52	34		74.76	37		75.13	55		74.42	45		74.17	91		74.29	69			74.85	46		74.36	115		74.7	124		74.33	132		74.93	88		74.74	69			73.26	14		73.09	24		73.22	28		73.49	19
74.82	34		74.99	34		75.31	58		74.62	46		74.4	98		74.44	73			75.13	47		74.64	120		74.85	137		74.51	132		75.08	95		74.91	71			73.43	17		73.27	24		73.44	24		73.72	21
75.01	34		75.13	36		75.53	55		74.92	45		74.56	93		74.61	69			75.35	47		74.85	121		75.13	130		74.61	139		75.26	99		75.15	72			73.66	16		73.43	22		73.67	26		73.92	20
75.19	33		75.34	39		75.68	58		75.07	46		74.8	89		74.85	66			75.49	49		75.02	121		75.27	136		74.97	143		75.42	100		75.31	76			73.95	15		73.67	27		73.85	22		74.12	21
75.37	35		75.51	34		75.87	62		75.25	49		74.95	89		75.06	76			75.7	48		75.23	128		75.45	134		75.07	139		75.57	101		75.46	73			74.16	16		73.81	25		74.06	26		74.27	21
75.65	33		75.7	37		76.12	59		75.49	42		75.23	86		75.28	71			75.93	51		75.44	125		75.68	135		75.31	145		75.91	105		75.7	76			74.31	16		74.1	24		74.26	26		74.49	22
75.78	33		75.95	32		76.32	59		75.63	46		75.38	87		75.45	77			76.15	54		75.65	129		75.88	139		75.46	143		76.09	101		75.91	70			74.46	17		74.27	27		74.43	27		74.69	24
75.95	37		76.11	36		76.43	61		75.83	46		75.6	91		75.67	73			76.32	51		75.76	131		76.04	145		75.74	146		76.31	110		76.08	79			74.69	19		74.55	23		74.64	24		74.89	21
76.15	32		76.29	35		76.69	61		76	49		75.76	86		75.9	70			76.65	55		76.03	125		76.24	144		75.88	141		76.47	102		76.24	81			74.82	17		74.63	25		74.77	29		75.1	23
76.42	34		76.45	33		76.81	60		76.21	45		75.96	81		76.09	77			76.86	58		76.2	134		76.58	144		76.08	147		76.71	111		76.48	78			75.04	17		74.91	25		74.98	26		75.26	23
76.58	35		76.7	37		77.04	66		76.42	46		76.17	87		76.28	76			77.05	54		76.38	138		76.67	144		76.29	156		76.94	115		76.67	86			75.25	20		75	25		75.24	27		75.54	23
76.79	35		76.88	38		77.31	63		76.58	46		76.39	87		76.48	70			77.23	59		76.6	139		76.85	152		76.5	148		76.99	113		76.85	85			75.44	17		75.21	28		75.38	25		75.72	23
76.97	33		77.17	37		77.52	61		76.86	47		76.62	87		76.62	75			77.45	60		76.78	138		77.08	157		76.7	159		77.2	113		76.99	88			75.63	16		75.59	27		75.6	25		75.88	24
77.23	35		77.38	39		77.71	67		77.02	49		76.74	84		76.86	73			77.64	60		76.99	147		77.29	154		76.89	154		77.52	113		77.31	86			75.85	18		75.78	29		75.75	27		76.06	24
77.39	34		77.55	36		77.88	65		77.24	44		76.92	81		77.06	81			77.79	59		77.25	149		77.49	161		77.08	167		77.7	121		77.4	92			76.03	17		75.96	27		75.95	26		76.27	23
77.57	34		77.76	35		78.02	71		77.43	48		77.1	85		77.25	79			78.02	57		77.42	148		77.65	163		77.28	166		77.85	115		77.69	96			76.21	20		76.22	28		76.12	28		76.49	23
77.88	38		77.88	38		78.24	75		77.6	44		77.38	82		77.38	77			78.22	65		77.6	148		77.88	164		77.53	166		78.08	119		77.87	94			76.32	21		76.38	28		76.3	27		76.71	24
78.02	34		78.15	32		78.45	70		77.85	50		77.55	85		77.63	76			78.44	65		77.82	157		78.05	167		77.74	163		78.27	118		78.08	87			76.6	21		76.56	31		76.54	32		76.87	24
																			78.52	64		78.02	161		78.24	168		77.9	169		78.46	117		78.27	96			76.84	21		76.77	32		76.74	28		77.07	22
																			78.77	63		78.17	159		78.47	171		78.05	168		78.56	131		78.46	95			77.06	21		76.89	30		76.92	28		77.31	23
																			78.98	62		78.42	154		78.63	173		78.27	177		78.81	129		78.64	97			77.26	22		77.13	30		77.12	30		77.56	25
																			79.17	67		78.63	158		78.91	177		78.49	174		79.09	134		78.84	101			77.43	23		77.31	33		77.34	31		77.67	28
																			79.36	70		78.75	158		79.05	178		78.64	187		79.28	131		79.06	105			77.62	24		77.57	31		77.57	33		77.95	29
																			79.5	69		78.97	171		79.24	184		78.81	189		79.45	132		79.22	109			77.79	24		77.73	34		77.7	33		78.13	26
																																						78.04	27		77.93	29
[truncated: 4 more columns]

## Sheet: FR C. thermalis
Repeat 1																			Repeat 2																			Repeat 3
	1 flash			2 flashes			3 flashes			4 flashes			5 flashes			6 flashes				1 flash			2 flashes			3 flashes			4 flashes			5 flashes			6 flashes				1flash			2flashes			3flashes			4flashes
3.61	59		3.51	155		4.01	181		4.43	186		4.17	191		3.8	183			4.35	70		4.04	138		3.68	166		3.67	169		3.52	196		3.52	331			4.2	42		4.02	66		3.75	56		4.07	41
3.78	63		3.75	151		4.19	189		4.62	192		4.27	201		3.99	184			4.56	72		4.37	145		3.81	170		3.92	164		3.8	201		3.68	330			4.17	38		4.02	67		3.77	49		4.56	44
4.01	56		3.96	160		4.38	199		4.81	187		4.59	202		4.27	191			4.83	74		4.56	142		3.88	170		4.04	172		3.85	197		3.81	341			4.18	39		3.92	64		3.76	49		4.06	47
4.23	59		4.07	163		4.65	192		5.02	197		4.73	202		4.48	189			4.98	77		4.73	146		4.25	168		4.27	175		4.25	209		4.17	347			4.31	41		3.99	61		3.86	49		4.64	44
4.52	63		4.34	162		4.87	205		5.28	196		4.88	199		4.65	183			5.28	80		4.98	146		4.54	185		4.38	170		4.27	212		4.31	356			3.99	40		4.23	62		4.01	44		4.31	42
4.59	63		4.54	165		5.06	197		5.45	201		5.06	206		4.93	192			5.38	82		5.16	149		4.54	177		4.73	173		4.56	223		4.59	370			4.27	43		4.27	67		3.92	45		4.56	39
4.83	61		4.69	166		5.2	206		5.54	201		5.27	211		5.08	194			5.48	86		5.25	153		4.85	192		4.85	176		4.7	235		4.7	373			4.18	39		4.2	61		3.85	47		4.83	41
5.06	68		4.88	171		5.39	195		5.85	201		5.42	208		5.24	199			5.81	86		5.56	163		5.08	188		5.06	179		4.87	234		5	376			4.21	41		4.17	61		3.91	48		4.77	39
5.29	63		5.16	173		5.67	202		5.99	199		5.64	212		5.42	193			5.88	87		5.69	165		5.31	197		5.23	187		5.1	244		5.1	373			4.31	38		4.06	65		4.18	48		4.62	38
5.43	66		5.24	178		5.88	210		6.14	198		5.85	213		5.56	204			6.08	92		5.89	164		5.43	200		5.42	192		5.31	253		5.33	397			4.1	37		4.25	64		4.18	47		4.67	40
5.7	73		5.49	174		6.04	206		6.39	215		6.06	211		5.83	203			6.27	93		6.23	178		5.56	214		5.6	194		5.48	265		5.54	412			4.42	39		4.67	58		4.25	47		4.85	42
5.81	69		5.66	183		6.27	210		6.6	204		6.24	218		6.04	201			6.5	98		6.39	179		5.87	215		5.78	203		5.67	271		5.79	406			4.5	42		4.69	62		4.45	47		4.88	38
5.99	67		5.85	177		6.54	208		6.74	215		6.41	215		6.29	205			6.81	95		6.58	180		6.08	225		6.12	213		5.91	283		5.97	412			4.64	39		4.73	61		4.68	45		5	42
6.24	67		6.03	177		6.66	209		6.92	212		6.69	223		6.42	211			6.99	104		6.81	182		6.23	224		6.27	217		6.14	284		6.08	422			4.69	40		5.1	65		4.7	48		5.08	39
6.41	63		6.31	186		6.85	211		7.15	206		6.75	223		6.6	208			7.23	108		6.91	191		6.39	242		6.5	222		6.29	290		6.35	423			4.97	40		5.41	62		4.85	46		5.42	38
6.58	68		6.52	189		7.06	213		7.35	223		7.04	221		6.81	208			7.27	108		7.1	199		6.7	240		6.6	234		6.48	301		6.56	448			5.38	40		5.27	65		5.06	44		5.48	42
6.81	71		6.66	182		7.27	211		7.56	213		7.24	216		6.94	217			7.64	110		7.35	214		6.81	254		6.79	237		6.73	312		6.78	428			5.31	41		5.73	60		5.28	49		5.68	41
7	69		6.89	183		7.42	218		7.77	210		7.49	225		7.1	219			7.9	115		7.48	220		6.91	265		7.12	241		6.83	312		6.93	447			5.35	38		5.75	67		5.52	49		6.06	39
7.23	66		7.08	188		7.62	215		7.92	213		7.68	218		7.39	223			8.06	113		7.77	222		7.19	260		7.24	254		7.13	326		7.2	460			5.75	38		5.91	67		5.64	50		6.24	41
7.37	63		7.31	202		7.84	214		8.13	224		7.96	227		7.5	232			8.32	118		7.96	228		7.48	273		7.46	263		7.33	340		7.35	457			6.37	44		6.29	69		6.2	47		6.25	40
7.52	65		7.45	192		7.96	216		8.38	222		8.02	224		7.79	238			8.34	124		8.1	242		7.69	287		7.68	265		7.54	351		7.52	464			6.24	41		6.39	72		6.22	50		6.56	42
7.81	69		7.7	188		8.15	229		8.57	231		8.2	225		7.94	245			8.61	127		8.4	233		7.79	302		7.81	280		7.74	346		7.71	467			6.41	43		6.78	67		6.37	51		6.85	44
7.96	69		7.85	196		8.34	233		8.74	227		8.49	228		8.23	262			8.8	121		8.66	244		8.09	305		8.06	292		7.95	358		8	483			7.14	46		7.1	74		6.72	51		7.1	49
8.17	68		8	190		8.59	246		8.93	230		8.72	230		8.34	272			8.93	128		8.6	253		8.17	323		8.27	296		8.15	371		8.19	502			7.27	47		7.37	76		7.18	53		7.46	45
8.34	70		8.32	191		8.75	246		9.16	234		8.93	227		8.65	269			9.32	134		8.93	268		8.49	318		8.52	298		8.35	375		8.27	497			7.34	46		7.65	73		7.17	53		7.77	45
8.49	78		8.49	195		8.9	268		9.37	241		9.11	229		8.78	292			9.33	127		9.16	273		8.66	325		8.7	308		8.75	394		8.55	511			7.94	44		7.75	78		7.5	56		8.04	46
8.81	72		8.72	210		9.16	256		9.56	241		9.35	236		8.99	303			9.53	140		9.16	291		8.86	335		8.81	313		8.61	394		8.82	510			8.2	45		8.08	77		8	51		8.19	45
8.88	75		8.87	209		9.36	267		9.72	242		9.54	245		9.2	307			9.75	138		9.53	295		9.11	343		9.07	323		8.85	410		8.96	523			8.38	50		8.42	83		7.9	54		8.59	46
9.16	80		9.17	208		9.52	286		10.02	251		9.67	242		9.38	332			10.02	145		9.77	300		9.12	362		9.3	338		9.07	404		9.07	512			8.85	52		8.55	78		8.17	57		8.59	45
9.39	81		9.36	213		9.77	284		10.17	259		9.9	265		9.67	337			10.21	147		9.95	310		9.36	356		9.43	346		9.32	426		9.3	534			9.03	48		8.76	80		8.71	59		8.99	47
9.52	85		9.52	218		9.94	301		10.38	264		10.13	272		9.88	345			10.23	143		10.11	308		9.66	362		9.77	346		9.58	433		9.6	538			8.82	51		9.13	83		8.65	62		9.24	47
9.7	92		9.75	226		10.13	309		10.61	268		10.28	282		10.07	360			10.74	152		10.31	319		9.95	378		9.67	353		9.77	440		9.72	543			9.17	50		9.24	88		8.97	58		9.38	52
9.93	90		9.96	236		10.3	320		10.8	282		10.57	280		10.32	378			10.81	149		10.56	336		10.04	382		10.01	354		9.92	453		9.94	553			9.81	55		9.6	88		9.33	62		9.74	51
10.17	95		10.17	245		10.56	340		10.99	289		10.77	293		10.4	382			10.85	156		10.74	340		10.13	399		10.26	376		10.27	458		10.09	568			9.54	51		9.79	90		9.7	65		9.95	54
10.41	92		10.38	257		10.74	336		11.21	306		10.98	302		10.63	389			11.15	168		10.91	350		10.36	389		10.53	377		10.38	467		10.26	574			9.79	55		10.07	88		9.73	64		10.38	52
10.55	103		10.57	261		10.93	349		11.36	310		11.1	311		10.85	406			11.42	165		11.13	359		10.46	400		10.66	386		10.55	483		10.46	585			10.36	53		10.23	94		10.04	61		10.31	54
10.74	99		10.7	275		11.21	364		11.61	312		11.35	314		11.1	425			11.76	169		11.27	362		10.81	414		10.8	409		10.68	481		10.77	596			10.32	58		10.41	90		10.17	70		10.49	55
10.95	104		10.92	274		11.33	373		11.78	334		11.52	322		11.33	443			11.88	165		11.63	377		11.1	420		11.03	400		10.92	493		10.92	588			10.41	52		10.66	98		10.32	68		10.68	52
11.08	108		11.14	289		11.57	385		11.96	339		11.74	343		11.49	449			11.95	167		11.7	386		11.42	429		11.27	408		11.17	505		11.2	607			10.78	64		11.1	96		10.46	70		10.91	55
11.33	112		11.31	300		11.78	389		12.16	356		11.91	345		11.61	460			12.2	176		11.91	385		11.55	437		11.44	413		11.29	508		11.38	617			10.68	60		11.17	100		10.7	68		11.25	52
11.6	117		11.53	305		11.94	399		12.38	352		12.11	367		11.83	462			12.28	178		12.1	404		11.82	442		11.82	436		11.67	508		11.55	631			10.93	62		11.42	98		11	71		11.41	58
11.76	119		11.87	332		12.2	428		12.63	371		12.37	369		12.08	488			12.66	175		12.44	416		11.85	457		11.93	439		11.76	525		11.77	624			11.15	58		11.57	101		11.33	69		11.67	51
12.02	116		11.92	338		12.42	423		12.84	379		12.52	374		12.2	492			12.78	181		12.76	423		11.94	471		12.1	444		11.92	542		11.96	632			11.19	58		11.81	106		11.25	70		11.7	55
12.18	130		12.2	348		12.6	430		12.93	390		12.74	386		12.39	493			12.99	185		12.71	425		12.27	477		12.25	454		12.13	530		12.01	645			11.64	57		11.85	99		11.62	73		11.83	62
12.44	127		12.39	359		12.77	449		13.17	398		12.95	390		12.71	517			13.3	192		12.95	446		12.29	484		12.4	447		12.33	551		12.43	648			11.74	62		12.06	105		11.68	71		12.27	62
12.55	129		12.57	375		12.99	459		13.38	421		13.12	407		12.81	519			13.44	193		13.2	451		12.63	494		12.71	475		12.37	551		12.61	658			12.05	60		12.2	109		11.88	74		12.16	60
12.8	137		12.7	376		13.18	470		13.62	420		13.27	413		13.02	537			13.72	198		13.32	456		12.88	496		12.92	471		12.74	563		12.77	661			11.95	63		12.31	108		12.14	77		12.52	58
13.1	136		12.98	395		13.47	482		13.81	432		13.61	429		13.25	547			13.67	203		13.7	484		13.18	509		12.99	492		13.01	567		13.02	681			12.2	71		12.61	114		12.17	79		12.57	58
13.25	142		13.24	393		13.68	496		13.95	434		13.72	437		13.46	567			14	199		13.76	477		13.34	519		13.29	486		13.2	576		13.19	674			12.52	63		12.78	107		12.33	81		13.01	65
13.42	137		13.38	424		13.79	506		14.22	449		14.02	436		13.7	570			14.15	203		13.9	482		13.51	528		13.47	501		13.42	586		13.3	687			12.77	70		13.01	115		12.52	83		12.84	63
13.67	143		13.49	437		14	513		14.45	468		14.1	458		13.85	594			14.45	215		14.18	492		13.83	536		13.66	511		13.55	594		13.57	689			12.85	71		13.21	118		12.59	79		13.13	66
13.87	148		13.72	436		14.3	517		14.6	460		14.24	450		14.09	586			14.64	212		14.39	506		13.85	547		13.93	520		13.78	592		13.76	703			13.13	74		13.15	122		12.98	82		13.55	65
14.07	148		13.88	454		14.37	538		14.77	485		14.54	472		14.24	601			14.88	210		14.5	524		14.09	551		13.98	529		13.95	609		13.93	712			13.21	67		13.29	120		13.15	83		13.38	70
14.28	154		14.17	467		14.59	565		15.02	485		14.75	468		14.53	618			15.16	225		14.77	529		14.22	553		14.36	538		14.05	615		14.15	720			13.38	75		13.72	122		13.32	83		13.7	62
14.53	159		14.33	465		14.84	569		15.2	493		14.88	488		14.67	626			15.24	220		14.95	554		14.5	575		14.53	538		14.26	622		14.45	728			13.49	75		13.81	130		13.51	85		14.04	66
14.67	160		14.59	493		15.01	581		15.35	522		15.1	494		14.88	641			15.3	230		15.06	548		14.75	582		14.74	547		14.6	631		14.53	730			13.9	75		13.93	123		13.66	85		14.13	66
14.88	169		14.75	493		15.18	574		15.66	511		15.34	520		15.08	649			15.52	232		15.34	563		14.74	584		14.88	545		14.82	659		14.76	744			13.88	77		14.24	132		13.88	85		14.43	65
15.07	164		15.01	519		15.4	600		15.88	525		15.55	520		15.32	665			15.86	232		15.58	567		14.95	587		15.08	551		15.01	640		14.92	745			14.16	77		14.31	127		14.1	92		14.53	65
15.2	167		15.2	525		15.6	595		16.05	546		15.75	521		15.52	677			16.02	241		15.81	581		15.12	615		15.3	591		15.16	663		15.2	758			14.45	81		14.67	134		14.31	91		14.58	68
15.38	167		15.36	553		15.77	628		16.31	534		15.92	527		15.69	685			16.35	247		15.86	587		15.4	610		15.57	585		15.24	662		15.45	777			14.56	82		14.95	132		14.54	95		14.99	70
15.64	171		15.58	558		15.94	624		16.39	559		16.14	533		15.81	690			16.42	244		16.03	596		15.72	617		15.75	574		15.52	673		15.52	762			14.6	85		14.73	139		14.64	90		15.18	65
15.81	178		15.73	561		16.16	639		16.6	559		16.31	540		16.11	694			16.66	259		16.35	602		15.79	629		15.92	586		15.79	691		15.81	780			14.99	80		14.95	139		14.85	100		15.27	66
16.07	180		15.95	574		16.34	639		16.79	565		16.55	556		16.23	721			16.85	243		16.56	632		16.14	640		16.2	611		16.05	709		15.92	794			15.38	88		15.1	144		15.1	92		15.55	78
16.23	186		16.17	584		16.54	638		17.04	580		16.77	567		16.55	728			17.13	261		16.73	627		16.35	646		16.27	619		16.26	695		16.14	812			15.52	84		15.45	143		15.52	93		15.77	75
16.42	183		16.48	608		16.77	672		17.2	592		16.96	576		16.67	738			17.29	263		16.92	638		16.57	660		16.5	633		16.45	703		16.38	816			15.6	96		15.81	147		15.57	102		15.9	74
16.68	187		16.6	612		16.94	671		17.4	592		17.15	584		16.95	741			17.46	268		17.07	649		16.7	684		16.72	630		16.6	706		16.6	828			16	86		15.86	151		15.69	99		15.92	79
16.81	186		16.81	636		17.16	700		17.65	600		17.31	583		17.04	754			17.62	269		17.28	667		16.83	672		16.92	641		16.73	716		16.72	833			16.28	90		16.07	159		15.86	100		16.29	72
17.04	194		16.98	647		17.37	697		17.85	608		17.52	599		17.29	776			17.88	270		17.59	680		17.05	680		17.09	646		16.94	726		16.98	848			16.23	91		16.29	152		16.16	101		16.54	80
17.24	197		17.16	665		17.57	706		18.02	627		17.72	602		17.5	782			17.92	276		17.79	699		17.46	707		17.31	651		17.15	732		17.1	844			16.42	94		16.52	156		16.4	101		16.67	79
17.39	199		17.37	652		17.77	723		18.24	611		17.94	600		17.67	793			18.27	284		18.05	707		17.55	702		17.52	647		17.4	745		17.29	850			16.79	103		16.77	161		16.5	102		16.83	79
17.62	192		17.54	678		17.96	721		18.44	625		18.13	612		17.87	794			18.51	301		18.2	710		17.72	705		17.66	666		17.66	747		17.63	870			16.85	97		17.04	166		16.9	111		16.96	82
17.81	205		17.79	688		18.15	738		18.63	643		18.34	620		18.06	814			18.61	291		18.39	719		17.9	731		17.88	672		17.83	745		17.76	870			17.1	100		17.22	165		17.11	113		17.15	82
18.04	216		18.04	713		18.45	738		18.86	650		18.51	618		18.33	809			18.85	300		18.53	730		18.27	730		18.09	673		17.98	757		17.95	880			17.59	99		17.48	169		17.39	112		17.62	84
18.13	205		18.17	719		18.56	757		19.02	649		18.74	632		18.56	828			19.1	311		18.76	759		18.27	738		18.28	687		18.2	772		18.17	896			17.7	105		17.7	175		17.42	112		17.74	86
18.4	206		18.34	732		18.78	761		19.18	658		18.94	641		18.64	834			19.2	323		18.94	760		18.46	745		18.45	685		18.33	765		18.31	891			17.52	102		17.82	181		17.45	117		17.83	85
18.61	221		18.59	756		19.03	766		19.42	651		19.18	643		18.81	834			19.38	311		19.07	753		18.64	746		18.63	693		18.52	789		18.55	899			18.04	110		17.95	176		17.95	114		18.15	85
18.74	221		18.73	769		19.16	779		19.62	684		19.4	648		19.06	875			19.64	312		19.35	776		18.83	759		18.94	709		18.68	778		18.77	918			18.26	111		18.26	187		18.18	120		18.29	89
19.05	216		18.92	787		19.4	801		19.76	676		19.53	655		19.27	864			19.85	316		19.6	784		19.11	781		19.07	696		18.96	797		18.92	904			18.2	116		18.42	187		18.13	116		18.37	83
19.22	223		19.19	786		19.55	809		20.04	682		19.82	668		19.46	876			20.09	321		19.74	820		19.4	786		19.35	720		19.18	800		19.12	927			18.57	116		18.56	190		18.55	121		18.74	87
19.34	223		19.38	805		19.81	796		20.11	683		19.95	673		19.6	881			20.31	325		20.02	813		19.45	795		19.49	724		19.3	805		19.4	937			19.09	121		18.96	193		18.38	124		18.88	88
19.6	233		19.6	814		20.06	821		20.33	680		20.15	680		19.86	897			20.52	334		20.17	833		19.73	811		19.7	730		19.6	812		19.66	931			18.78	117		19.22	198		18.83	121		19.14	82
19.77	230		19.76	821		20.17	821		20.59	697		20.32	669		20.06	894			20.81	343		20.46	840		19.71	799		19.93	744		19.82	812		19.76	950			19.35	121		19.4	199		19.03	127		19.34	92
20.02	243		19.95	843		20.38	839		20.74	702		20.46	687		20.3	901			20.87	346		20.63	854		20.04	817		20.14	747		19.88	845		19.97	959			19.17	128		19.57	204		19.29	130		19.49	94
20.26	249		20.17	842		20.67	845		20.94	712		20.78	670		20.49	920			20.96	353		20.85	872		20.24	822		20.33	763		20.11	828		20.15	961			19.38	129		19.8	210		19.51	129		19.93	94
20.43	247		20.46	867		20.83	854		21.24	709		20.96	688		20.67	919			21.23	356		21.02	881		20.37	837		20.52	764		20.46	843		20.39	974			19.66	131		19.85	216		19.77	134		20.06	94
20.56	257		20.56	871		21.02	854		21.45	711		21.16	700		20.88	929			21.32	358		21.18	892		20.59	841		20.67	769		20.59	842		20.52	975			20.14	139		20.1	215		19.87	133		20.17	96
20.85	248		20.74	895		21.2	884		21.58	725		21.35	707		21.07	941			21.62	361		21.47	910		20.92	854		20.87	767		20.85	848		20.82	1005			20.17	131		20.43	224		19.88	134		20.38	94
21.02	258		20.95	902		21.41	882		21.7	736		21.6	716		21.34	947			21.75	372		21.7	922		21.09	860		21.07	772		21.07	867		20.9	994			20.09	142		20.49	230		20.17	133		20.95	104
21.19	254		21.27	921		21.69	882		22	733		21.78	713		21.52	968			22.05	379		21.8	935		21.24	877		21.29	791		21.19	869		21.16	1015			20.28	133		20.78	224		20.26	140		20.9	99
21.47	259		21.36	912		21.87	893		22.2	731		21.95	724		21.67	957			22.28	386		22.06	944		21.29	886		21.56	785		21.47	849		21.41	1010			20.49	139		20.94	230		20.49	139		21.09	104
21.62	264		21.53	946		22.09	896		22.4	754		22.2	719		21.89	977			22.41	400		22.17	952		21.51	878		21.75	809		21.51	880		21.58	1031			20.78	139		21.18	233		20.89	142		21.1	103
21.85	264		21.76	955		22.2	893		22.62	744		22.41	718		22.11	981			22.58	395		22.38	964		21.94	900		21.85	825		21.81	882		21.77	1027			20.83	144		21.45	240		20.87	138		21.42	108
21.98	271		21.95	967		22.41	912		22.85	754		22.6	732		22.36	976			22.88	391		22.52	981		22.09	917		22.16	824		21.95	891		21.99	1038			21.27	144		21.6	249		21.03	151		21.71	111
22.2	279		22.23	980		22.53	924		23	760		22.81	724		22.56	996			23.06	408		22.78	988		22.34	916		22.35	814		22.18	891		22.14	1062			21.29	153		21.77	254		21.34	154		21.98	112
22.4	276		22.35	989		22.86	923		23.18	761		22.96	739		22.74	1012			23.25	412		23.02	1025		22.65	948		22.69	823		22.42	897		22.33	1056			21.76	154		22	251		21.56	156		22.18	111
22.64	279		22.67	1018		22.95	948		23.4	758		23.14	736		22.87	1008			23.49	415		23.05	1024		22.71	939		22.71	845		22.62	919		22.58	1076			21.99	160		22.11	256		21.52	159		22.41	109
22.82	289		22.73	1031		23.2	953		23.6	758		23.33	727		23.11	1008			23.73	423		23.38	1030		22.88	955		22.89	840		22.76	921		22.78	1069			22.07	155		22.36	259		21.89	156		22.57	114
23.04	289		23.02	1025		23.35	949		23.84	759		23.55	738		23.27	1024			23.88	432		23.63	1038		23.18	946		23.1	856		22.99	917		22.95	1067			22.05	164		22.67	268		22.22	159		22.69	113
23.23	283		23.17	1038		23.52	971		24.04	769		23.72	742		23.52	1038			24.03	442		23.72	1071		23.23	974		23.34	861		23.05	933		23.22	1098			22.26	167		22.67	276		22.12	161		22.74	113
23.41	292		23.35	1063		23.74	966		24.24	763		23.99	747		23.68	1050			24.19	450		23.95	1058		23.48	973		23.52	867		23.36	926		23.35	1095			22.49	168		22.82	281		22.51	162		23.2	116
23.72	304		23.55	1075		23.9	972		24.45	776		24.19	746		23.88	1046			24.6	453		24.13	1085		23.7	982		23.77	876		23.57	944		23.55	1112			22.81	175		23.22	282		22.84	169		23.13	121
23.78	299		23.83	1091		24.14	985		24.6	789		24.32	746		24.07	1055			24.68	454		24.38	1107		23.84	998		23.88	881		23.76	938		23.81	1126			23.05	175		23.22	283		22.95	169		23.27	114
24.02	311		23.94	1115		24.42	985		24.8	783		24.59	748		24.28	1054			24.82	468		24.48	1112		24.15	1000		24.07	898		24.01	952		24.07	1122			23.18	185		23.57	285		23.2	178		23.54	118
24.21	306		24.2	1131		24.6	996		25.05	781		24.74	757		24.45	1051			25.13	465		24.84	1131		24.32	1013		24.32	899		24.15	967		24.17	1139			23.31	179		23.81	296		23.13	166		23.94	117
24.43	307		24.38	1124		24.77	1000		25.24	790		24.95	757		24.67	1069			25.33	469		24.97	1140		24.5	1027		24.51	905		24.35	953		24.37	1134			23.77	181		23.96	295		23.4	178		23.97	118
24.6	321		24.6	1144		25	1011		25.43	797		25.18	751		24.85	1083			25.36	485		25.18	1160		24.59	1029		24.71	904		24.57	966		24.57	1158			23.88	191		24.14	306		23.84	184		24.02	125
24.84	322		24.74	1143		25.13	1009		25.59	790		25.33	769		25.09	1080			25.58	492		25.38	1179		24.81	1028		24.85	914		24.77	974		24.73	1164			24.02	194		24.19	307		24.01	184		24.5	116
25.13	324		25	1160		25.31	1025		25.76	786		25.63	752		25.22	1091			25.87	495		25.61	1189		25.05	1050		25.05	926		24.93	980		24.98	1171			24.32	195		24.35	315		24.03	188		24.45	124
25.31	329		25.2	1179		25.49	1031		26.02	803		25.74	752		25.46	1091			26.13	515		25.82	1200		25.23	1035		25.4	918		25.2	989		25.24	1174			24.35	209		24.57	312		24.33	189		24.66	127
25.42	323		25.41	1181		25.71	1029		26.17	802		25.94	769		25.7	1112			26.25	516		25.99	1213		25.56	1062		25.54	935		25.4	984		25.38	1201			24.61	198		24.74	324		24.49	189		24.99	127
25.6	328		25.54	1192		25.94	1049		26.38	792		26.1	762		25.89	1099			26.48	525		26.17	1228		25.7	1077		25.78	945		25.58	1006		25.58	1191			24.81	214		24.93	334		24.81	202		25.17	126
25.79	332		25.78	1203		26.14	1038		26.6	804		26.35	775		26.1	1121			26.61	535		26.33	1238		25.83	1084		25.97	943		25.77	1012		25.72	1196			25	213		25.16	325		24.95	191		25.42	136
26.01	341		26.03	1221		26.39	1044		26.84	804		26.57	771		26.25	1113			26.86	528		26.57	1249		26.07	1103		26.07	955		25.97	1025		25.94	1198			25.2	218		25.49	338		25.43	198		25.69	129
26.24	344		26.2	1236		26.57	1049		27.05	808		26.74	761		26.46	1117			27.01	539		26.85	1260		26.27	1115		26.32	959		26.19	1031		26.17	1204			25.63	214		25.85	348		25.46	205		25.59	125
26.41	345		26.48	1248		26.76	1064		27.23	799		26.98	749		26.77	1127			27.2	546		27.02	1264		26.38	1126		26.52	971		26.43	1015		26.35	1229			25.85	222		25.79	353		25.82	204		26.14	132
26.66	362		26.62	1256		27.02	1061		27.32	824		27.14	766		26.85	1139			27.35	558		27.24	1292		26.67	1129		26.69	977		26.62	1041		26.55	1228			25.97	223		25.96	360		25.97	207		26.14	137
26.89	367		26.78	1279		27.2	1081		27.67	813		27.34	764		27.1	1142			27.77	564		27.45	1303		27.01	1134		26.89	983		26.74	1030		26.76	1245			26.17	231		26.24	363		26.13	209		26.17	140
27.02	364		26.96	1281		27.36	1083		27.81	806		27.52	765		27.3	1146			27.95	569		27.61	1324		27.16	1134		27.13	980		26.99	1039		26.99	1251			26.38	230		26.78	362		26.49	213		26.45	140
27.27	378		27.2	1285		27.61	1094		28.04	822		27.8	779		27.54	1144			27.95	582		27.88	1335		27.14	1151		27.29	996		27.18	1056		27.17	1267			26.71	240		26.64	376		26.86	221		26.86	140
27.44	373		27.41	1307		27.73	1096		28.2	804		27.88	769		27.81	1146			28.3	597		28.02	1339		27.49	1177		27.56	992		27.39	1043		27.39	1266			26.82	245		27	379		26.76	220		26.99	142
27.61	383		27.61	1321		28.02	1101		28.41	821		28.17	770		27.91	1163			28.42	601		28.2	1363		27.68	1180		27.72	1007		27.57	1065		27.6	1275			26.82	255		27.18	391		27.06	223		27.07	145
27.81	377		27.7	1328		28.18	1108		28.63	820		28.36	773		28.16	1172			28.63	621		28.31	1369		27.87	1180		27.98	1021		27.85	1063		27.8	1273			27.52	261		27.42	384		27.39	230		27.29	144
27.98	387		27.98	1349		28.36	1117		28.85	816		28.56	765		28.34	1181			28.86	614		28.66	1383		28.02	1175		28.09	1010		27.88	1072		28.02	1285			27.39	259		27.62	400		27.37	237		27.59	156
28.18	390		28.18	1357		28.66	1112		29.02	834		28.68	775		28.5	1167			28.95	623		28.84	1408		28.38	1202		28.3	1021		28.17	1065		28.12	1302			27.48	268		27.88	402		27.55	236		27.7	146
28.38	397		28.36	1364		28.8	1127		29.24	823		28.95	779		28.73	1186			29.12	644		29.09	1413		28.48	1214		28.52	1025		28.3	1064		28.38	1312			27.86	267		27.98	413		27.6	232		28.02	151
28.57	392		28.61	1388		29.02	1144		29.35	811		29.24	764		28.93	1166			29.56	651		29.2	1436		28.66	1218		28.7	1038		28.66	1081		28.63	1308			28.16	278		28.24	421		27.75	244		28.2	153
28.86	409		28.82	1397		29.23	1132		29.57	822		29.36	763		29.11	1184			29.82	659		29.3	1441		28.85	1223		28.9	1038		28.74	1082		28.84	1324			27.91	277		28.34	437		27.75	243		28.43	160
29.04	394		29.02	1401		29.39	1145		29.75	812		29.59	780		29.27	1198			29.91	674		29.65	1448		28.95	1242		29.16	1068		28.92	1096		28.92	1322			28.22	296		28.67	435		28.31	249		28.63	163
29.2	418		29.24	1421		29.6	1140		29.95	831		29.77	768		29.42	1199			30.02	676		29.8	1457		29.23	1256		29.31	1056		29.23	1095		29.24	1331			28.6	298		28.7	437		28.33	249		28.77	160
29.36	413		29.41	1425		29.75	1150		30.24	814		29.98	764		29.73	1199			30.24	691		30.02	1485		29.6	1258		29.49	1061		29.36	1106		29.41	1339			28.7	301		29.02	452		28.8	249		29.11	168
29.67	419		29.65	1431		29.95	1151		30.43	812		30.13	767		29.92	1187			30.46	695		30.18	1494		29.77	1265		29.73	1068		29.7	1106		29.57	1346			28.82	287		29.23	464		28.52	263		29.17	165
29.81	427		29.91	1448		30.18	1152		30.62	817		30.37	764		30.09	1210			30.71	711		30.25	1506		29.98	1273		29.93	1062		29.75	1111		29.85	1353			29.2	308		29.52	460		28.84	263		29.38	171
30.02	428		29.98	1451		30.45	1169		30.78	811		30.63	763		30.27	1209			30.94	714		30.51	1519		30.11	1265		30.14	1084		29.98	1124		29.92	1370			29.1	310		29.52	461		29.24	254		29.65	165
30.23	439		30.19	1478		30.57	1158		31.03	822		30.75	767		30.49	1207			31.17	737		30.81	1516		30.2	1294		30.38	1084		30.25	1134		30.1	1370			29.38	313		29.73	470		29.22	262		29.74	171
30.35	440		30.43	1468		30.81	1178		31.2	824		31	777		30.69	1229			31.37	725		30.96	1547		30.36	1296		30.55	1095		30.35	1128		30.44	1375			29.52	323		29.97	481		29.6	268		30.12	176
30.67	449		30.58	1490		30.99	1170		31.37	815		31.17	763		30.81	1245			31.44	743		31.17	1562		30.64	1310		30.74	1089		30.57	1143		30.63	1387			29.67	323		30	481		29.88	271		30.19	174
30.83	451		30.89	1488		31.19	1184		31.59	828		31.47	763		31.13	1219			31.6	763		31.44	1556		30.93	1326		30.89	1098		30.71	1147		30.81	1402			29.86	340		30.41	480		29.92	271		30.48	178
31.02	441		31.05	1499		31.4	1182		31.84	819		31.58	762		31.31	1241			31.84	779		31.59	1570		31.06	1335		31.14	1109		30.95	1155		30.99	1398			30.17	327		30.55	492		30.02	274		30.62	180
31.21	468		31.19	1509		31.56	1201		31.98	813		31.81	767		31.51	1223			32.07	775		31.84	1587		31.31	1334		31.31	1119		31.15	1155		31.17	1408			30.41	342		30.68	514		30.42	285		30.83	183
31.38	467		31.41	1525		31.74	1198		32.18	818		32	763		31.7	1232			32.25	791		32.04	1596		31.4	1340		31.56	1125		31.4	1154		31.45	1419			30.94	351		30.85	512		30.53	287		31.1	180
31.58	464		31.64	1529		31.97	1196		32.43	813		32.2	763		31.99	1230			32.5	798		32.17	1609		31.67	1362		31.69	1127		31.6	1163		31.6	1428			30.71	351		31.07	523		30.77	288		31.31	186
31.83	468		31.83	1539		32.07	1191		32.67	821		32.34	764		32.11	1241			32.71	826		32.31	1618		31.74	1361		31.91	1125		31.84	1165		31.81	1430			31.13	362		31.32	532		31.01	296		31.58	189
32.03	475		31.98	1558		32.34	1185		32.77	818		32.57	759		32.22	1234			32.92	820		32.62	1637		32.07	1382		32.13	1132		31.99	1170		31.95	1436			31.21	367		31.75	546		31.38	292		31.58	196
32.18	484		32.2	1564		32.53	1208		32.99	816		32.69	760		32.51	1242			33.04	825		32.83	1641		32.36	1390		32.37	1142		32.11	1173		32.23	1445			31.41	377		31.85	541		31.27	307		31.98	191
32.38	492		32.45	1561		32.71	1202		33.2	807		32.99	760		32.71	1243			33.31	850		33.02	1662		32.51	1393		32.5	1138		32.38	1188		32.31	1455			31.74	360		31.95	555		31.81	313		32.14	198
32.63	489		32.56	1578		32.92	1211		33.35	814		33.15	753		32.87	1249			33.52	856		33.19	1667		32.72	1402		32.76	1145		32.67	1172		32.52	1464			31.9	388		32.27	557		31.86	310		32.09	193
32.85	490		32.81	1594		33.06	1226		33.63	801		33.34	762		33.02	1238			33.74	860		33.45	1681		33.01	1405		32.94	1158		32.72	1196		32.74	1458			32.14	398		32.48	574		31.99	314		32.67	197
33.09	515		33.06	1577		33.31	1218		33.88	814		33.54	752		33.35	1251			33.87	882		33.66	1694		33.11	1418		33.13	1160		32.9	1200		32.99	1472			32.23	414		32.55	576		32.22	325		32.85	212
33.31	508		33.24	1588		33.52	1229		34.01	812		33.81	760		33.54	1264			34.1	897		33.87	1698		33.35	1429		33.29	1165		33.15	1204		33.2	1480			32.59	407		32.92	572		32.41	324		33.15	204
33.36	511		33.38	1605		33.7	1220		34.27	804		34.03	744		33.73	1249			34.33	898		33.95	1706		33.42	1432		33.5	1162		33.38	1214		33.42	1485			32.67	421		33.13	593		32.62	342		33.16	203
33.64	522		33.54	1619		33.96	1236		34.41	814		34.21	758		33.91	1253			34.49	919		34.2	1732		33.61	1447		33.78	1176		33.48	1216		33.6	1483			32.85	417		33.28	599		32.8	335		33.15	201
33.81	525		33.88	1630		34.1	1241		34.63	808		34.33	758		34.08	1256			34.68	918		34.41	1731		33.68	1446		33.97	1195		33.75	1225		33.77	1490			33.15	433		33.57	607		32.99	342		33.52	206
34.08	533		33.97	1624		34.34	1235		34.79	810		34.58	762		34.29	1256			34.94	930		34.63	1741		33.99	1454		34.2	1179		33.93	1227		33.99	1504			33.49	443		33.67	615		33.27	349		33.73	218
34.26	536		34.24	1628		34.56	1236		35.05	800		34.79	746		34.45	1258			35.15	935		34.74	1739		34.2	1461		34.38	1186		34.17	1219		34.2	1510			33.5	445		33.86	616		33.31	354		33.6	216
34.42	541		34.45	1647		34.74	1232		35.2	796		35.03	756		34.7	1276			35.33	959		35.03	1764		34.43	1466		34.48	1222		34.36	1235		34.34	1518			33.85	443		34.12	628		33.7	341		33.99	220
34.6	554		34.58	1648		34.99	1240		35.4	795		35.14	743		34.84	1266			35.48	958		35.25	1769		34.63	1473		34.8	1208		34.56	1258		34.62	1514			33.95	456		34.28	620		33.88	354		34.03	217
34.88	558		34.77	1652		35.13	1244		35.55	800		35.33	760		35.1	1268			35.63	976		35.41	1787		34.86	1481		34.95	1223		34.76	1250		34.82	1530			33.95	448		34.22	649		34.19	366		34.54	225
35.03	551		34.99	1660		35.31	1244		35.81	801		35.59	743		35.27	1261			35.71	996		35.64	1789		35.17	1488		35.17	1220		35.08	1246		34.96	1527			34.33	472		34.71	644		34.24	363		34.47	226
35.27	557		35.17	1663		35.57	1238		36.02	791		35.78	741		35.5	1272			36.03	1000		35.78	1790		35.25	1519		35.4	1231		35.2	1264		35.17	1531			34.47	474		34.68	662		34.36	368		34.63	224
35.36	572		35.43	1672		35.75	1253		36.18	787		36.03	750		35.64	1266			36.22	1008		35.99	1813		35.4	1504		35.59	1228		35.33	1266		35.41	1546			34.76	488		35.06	655		34.61	376		35.13	231
35.62	578		35.56	1670		35.99	1242		36.42	790		36.14	733		35.92	1259			36.37	1015		36.25	1816		35.68	1528		35.77	1233		35.67	1276		35.59	1549			35.01	492		35.31	645		34.9	374		35.02	230
35.81	568		35.86	1668		36.2	1250		36.63	787		36.39	750		36.09	1270			36.62	1039		36.42	1826		35.99	1521		35.97	1236		35.74	1273		35.8	1561			35.1	510		35.12	661		35.01	390		35.31	235
35.96	582		36.01	1691		36.42	1255		36.82	807		36.49	747		36.27	1268			36.72	1042		36.51	1831		36.06	1530		36.12	1236		35.97	1273		35.92	1555			35.24	501		35.42	684		35.36	382		35.5	239
36.27	587		36.2	1691		36.55	1258		36.97	782		36.75	740		36.42	1275			37	1059		36.82	1843		36.27	1539		36.34	1244		36.11	1288		36.2	1562			35.4	501		35.81	679		35.43	401		35.76	238
36.39	587		36.39	1685		36.72	1248		37.19	776		36.97	736		36.71	1272			37.23	1063		36.93	1843		36.52	1547		36.57	1246		36.38	1284		36.34	1570			35.67	519		35.81	686		35.48	394		36.13	246
36.64	597		36.55	1696		37	1267		37.45	778		37.17	735		36.82	1274			37.61	1075		37.25	1857		36.73	1561		36.77	1249		36.62	1304		36.62	1568			35.86	527		35.99	690		36.1	399		36.3	253
36.88	606		36.8	1695		37.17	1248		37.61	774		37.38	727		37.02	1274			37.75	1096		37.36	1869		36.9	1561		36.98	1265		36.8	1300		36.86	1581			36.11	523		36.42	708		36.27	418		36.24	238
37.03	598		36.95	1704		37.36	1262		37.8	775		37.56	734		37.34	1267			37.9	1106		37.61	1861		37.17	1569		37.13	1277		36.95	1299		36.99	1600			36.27	529		36.46	709		36.31	413		36.79	254
37.28	620		37.2	1700		37.59	1269		37.95	772		37.8	734		37.47	1262			38.16	1116		37.92	1876		37.24	1571		37.33	1272		37.19	1312		37.21	1592			36.42	549		36.67	714		36.62	413		36.88	253
37.34	622		37.4	1709		37.82	1255		38.24	795		37.98	725		37.7	1270			38.28	1133		37.92	1885		37.57	1583		37.56	1269		37.42	1307		37.38	1598			36.67	552		36.88	720		36.91	418		36.88	261
37.63	624		37.57	1722		37.92	1261		38.38	778		38.24	744		37.9	1262			38.45	1136		38.17	1874		37.85	1582		37.73	1283		37.6	1318		37.6	1605			37.14	555		37.24	736		36.8	418		37.2	263
37.87	615		37.85	1704		38.17	1270		38.54	769		38.31	733		38.09	1252			38.58	1155		38.47	1891		37.85	1596		37.97	1279		37.76	1335		37.71	1605			37.1	569		37.32	735		37.02	429		37.38	261
38.1	635		38	1721		38.35	1259		38.74	764		38.59	719		38.31	1256			38.84	1148		38.61	1896		38.11	1604		38.16	1283		37.99	1318		38.13	1611			37.4	586		37.52	732		37.13	432		37.54	274
38.3	633		38.2	1726		38.59	1255		39.06	761		38.75	730		38.49	1260			39.03	1164		38.74	1911		38.27	1600		38.35	1284		38.24	1342		38.18	1615			37.49	567		37.66	760		37.36	440		37.76	274
38.4	637		38.44	1723		38.85	1252		39.2	766		38.99	725		38.63	1262			39.22	1181		38.93	1914		38.49	1596		38.47	1291		38.39	1324		38.38	1607			37.88	574		37.88	753		37.61	437		38.08	275
38.7	656		38.56	1715		38.94	1252		39.32	747		39.2	713		38.84	1267			39.43	1178		39.1	1915		38.65	1616		38.73	1298		38.54	1351		38.58	1623			37.92	576		38.09	765		37.83	440		38.18	279
38.88	650		38.86	1733		39.16	1253		39.63	752		39.41	723		39.13	1273			39.68	1192		39.44	1922		38.89	1619		38.96	1298		38.75	1337		38.85	1621			38.31	602		38.42	774		38.02	452		38.42	279
38.99	673		39.02	1722		39.38	1247		39.85	757		39.56	728		39.24	1253			39.86	1213		39.63	1930		39.13	1622		39.13	1287		38.95	1339		38.98	1628			38.24	598		38.67	770		38.1	450		38.66	284
39.24	655		39.24	1723		39.58	1242		40.02	757		39.77	738		39.52	1246			40.07	1230		39.81	1933		39.3	1627		39.32	1313		39.18	1346		39.11	1639			38.52	599		38.8	782		38.31	449		38.89	281
39.38	672		39.44	1734		39.79	1238		40.22	741		39.91	721		39.77	1259			40.25	1246		39.91	1946		39.43	1635		39.52	1309		39.38	1352		39.44	1645			39.01	611		39	779		38.86	465		39.1	297
39.65	660		39.61	1729		39.94	1249		40.48	749		40.17	732		39.98	1253			40.48	1244		40.18	1946		39.63	1631		39.75	1302		39.66	1354		39.6	1637			39.01	610		39.2	791		38.8	452		39.11	298
39.82	671		39.82	1721		40.13	1243		40.59	736		40.34	726		40.1	1246			40.72	1259		40.27	1949		39.92	1638		39.91	1309		39.86	1361		39.74	1648			39.06	631		39.46	795		39.09	460		39.5	289
40.01	679		40.03	1726		40.36	1245		40.77	734		40.56	706		40.32	1229			40.88	1259		40.56	1955		40.08	1636		40.13	1320		39.96	1356		39.99	1647			39.53	625		39.63	797		39.44	466		39.6	299
40.13	685		40.25	1732		40.54	1231		40.99	727		40.72	713		40.49	1223			41.11	1257		40.73	1958		40.23	1650		40.27	1317		40.1	1375		40.16	1653			39.46	641		39.8	807		39.32	467		40	305
40.42	687		40.42	1722		40.7	1234		41.18	746		41.04	732		40.74	1227			41.22	1275		40.99	1952		40.53	1662		40.56	1328		40.39	1366		40.34	1651			39.68	648		40.05	810		39.88	472		40.07	308
40.63	676		40.67	1721		40.92	1216		41.35	742		41.22	710		40.86	1227			41.49	1290		41.15	1962		40.61	1662		40.73	1333		40.59	1379		40.52	1653			40	656		40.13	809		39.85	477		40.39	308
40.87	693		40.86	1730		41.06	1221		41.56	724		41.46	711		41.11	1225			41.69	1299		41.29	1969		40.79	1659		40.92	1329		40.81	1378		40.77	1658			40.2	644		40.37	816		40.11	483		40.37	315
41.06	688		41.01	1720		41.35	1221		41.87	718		41.58	706		41.27	1217			41.83	1298		41.58	1976		41.03	1671		41.13	1321		41.01	1392		41.01	1658			40.22	659		40.73	818		40.41	475		40.66	313
41.24	689		41.2	1716		41.46	1200		41.97	722		41.74	703		41.58	1220			42.1	1317		41.83	1976		41.29	1669		41.32	1334		41.24	1389		41.32	1666			40.43	661		40.9	820		40.68	485		40.85	323
41.42	713		41.42	1716		41.71	1199		42.17	706		41.96	704		41.73	1220			42.25	1324		41.97	1980		41.44	1669		41.56	1347		41.32	1391		41.42	1677			40.52	653		40.97	824		40.77	480		41.17	314
41.56	707		41.59	1707		41.92	1212		42.45	717		42.17	711		41.95	1195			42.48	1343		42.16	1981		41.64	1662		41.69	1339		41.56	1386		41.56	1663			40.85	675		41.27	815		40.92	487		41.38	324
41.8	715		41.77	1706		42.14	1193		42.69	712		42.4	709		42.1	1216			42.6	1356		42.31	1986		41.9	1670		41.92	1357		41.74	1406		41.81	1675			40.99	676		41.56	836		40.87	499		41.52	325
41.99	724		41.99	1703		42.35	1199		42.78	693		42.6	725		42.31	1199			42.79	1362		42.6	1986		42.02	1666		42.13	1340		41.95	1399		41.94	1673			41.29	669		41.69	831		41.2	505		41.67	323
42.19	724		42.25	1699		42.55	1188		42.97	697		42.81	707		42.49	1211			43.06	1368		42.85	1989		42.34	1675		42.38	1348		42.1	1401		42.25	1669			41.66	680		41.89	836		41.35	495		41.87	325
42.43	720		42.38	1703		42.74	1172		43.2	707		43	706		42.7	1191			43.21	1365		42.95	1994		42.54	1685		42.59	1340		42.31	1411		42.52	1684			41.7	698		42.33	841		41.6	493		42.18	326
42.66	732		42.6	1697		42.95	1180		43.39	680		43.22	695		42.95	1198			43.37	1369		43.27	1986		42.64	1678		42.77	1362		42.62	1415		42.74	1675			42.16	687		42.31	839		41.85	508		42.11	328
42.79	724		42.79	1693		43.05	1176		43.56	695		43.44	703		43.15	1175			43.61	1385		43.37	1991		42.86	1684		42.92	1353		42.7	1409		42.9	1670			42	698		42.52	836		42.02	501		42.67	331
42.93	733		43.05	1680		43.32	1166		43.76	686		43.61	693		43.3	1164			43.81	1398		43.6	1997		43.06	1682		43.15	1360		42.95	1426		42.98	1673			42.23	713		42.72	836		42.14	503		42.55	338
43.21	735		43.22	1678		43.52	1158		43.99	677		43.77	687		43.49	1174			44.11	1395		43.78	2007		43.27	1691		43.38	1357		43.17	1405		43.22	1687			42.45	716		43.03	851		42.3	517		43.1	343
43.38	755		43.39	1674		43.75	1151		44.18	670		44.03	696		43.76	1158			44.28	1412		43.96	1996		43.49	1683		43.53	1361		43.42	1426		43.41	1686			42.69	717		43.05	846		42.81	505		43.36	330
43.54	750		43.65	1670		43.92	1161		44.45	663		44.28	690		43.94	1162			44.48	1412		44.19	1999		43.73	1688		43.63	1358		43.61	1426		43.56	1694			42.76	706		43.27	834		42.79	514		43.45	344
43.83	747		43.8	1677		44.1	1145		44.57	653		44.43	707		44.13	1156			44.72	1423		44.38	2002		43.83	1681		43.95	1363		43.7	1419		43.76	1695			43.03	733		43.59	836		43.13	511		43.47	360
44.04	767		43.99	1672		44.33	1119		44.87	668		44.62	699		44.34	1142			44.82	1443		44.65	2001		44.12	1679		44.13	1357		43.89	1431		44.07	1685			43.34	727		43.68	841		43.34	516		43.6	336
44.27	755		44.26	1647		44.58	1119		45.03	655		44.86	688		44.53	1131			45.01	1434		44.79	2009		44.25	1685		44.33	1360		44.12	1440		44.25	1685			43.7	722		43.92	827		43.45	514		44.16	343
44.45	748		44.42	1637		44.65	1114		45.2	641		44.95	697		44.71	1118			45.2	1445		44.97	1999		44.49	1688		44.53	1357		44.35	1435		44.41	1674			43.72	737		44.06	837		43.65	514		44.27	354
44.58	770		44.6	1644		44.91	1113		45.35	638		45.16	694		44.92	1134			45.52	1448		45.13	2005		44.77	1683		44.78	1360		44.67	1438		44.55	1689			43.83	737		44.23	834		44.01	518		44.17	353
44.88	761		44.82	1637		45.06	1103		45.6	645		45.42	688		45.08	1110			45.72	1451		45.45	2000		44.92	1681		44.96	1370		44.77	1440		44.7	1696			43.99	748		44.34	825		44.04	514		44.38	359
45.01	768		45.03	1638		45.32	1092		45.85	636		45.57	674		45.26	1106			45.81	1462		45.54	2002		45.04	1688		45.11	1367		45.03	1440		44.99	1693			44.31	747		44.55	827		44.18	518		44.81	359
45.19	767		45.23	1632		45.57	1096		46.03	633		45.67	689		45.43	1108			45.91	1463		45.69	2005		45.3	1669		45.35	1366		45.18	1439		45.15	1688			44.62	748		44.86	821		44.38	531		44.85	358
45.45	774		45.42	1604		45.74	1091		46.2	623		45.92	685		45.71	1075			46.24	1479		45.96	2002		45.58	1680		45.52	1357		45.35	1435		45.42	1683			44.58	745		45.18	827		44.74	522		44.91	357
45.62	771		45.63	1598		45.94	1058		46.43	615		46.15	668		45.88	1091			46.31	1463		46.17	2000		45.67	1673		45.77	1364		45.64	1432		45.67	1682			44.97	752		45.19	827		44.84	520		45.08	364
45.78	776		45.81	1593		46.08	1064		46.56	610		46.35	671		46.11	1075			46.52	1467		46.38	1997		45.85	1681		45.93	1360		45.85	1447		45.83	1684			45.15	762		45.45	821		45.03	513		45.57	362
46.01	792		46.06	1574		46.32	1057		46.71	607		46.54	670		46.3	1063			46.81	1488		46.54	1997		46.09	1672		46.08	1362		45.94	1450		46.03	1686			45.32	758		45.52	823		45.27	519		45.49	354
46.25	780		46.27	1574		46.52	1051		47.03	610		46.72	669		46.52	1070			46.99	1494		46.82	1996		46.17	1662		46.37	1359		46.17	1446		46.18	1695			45.43	768		45.74	810		45.52	511		45.96	357
46.42	777		46.45	1564		46.71	1035		47.15	596		46.93	666		46.74	1060			47.25	1482		46.94	1990		46.52	1669		46.55	1351		46.4	1450		46.28	1682			45.67	758		46	793		45.77	508		46.28	354
46.55	795		46.64	1556		46.93	1020		47.38	592		47.15	663		46.81	1042			47.43	1498		47.09	1988		46.67	1659		46.74	1364		46.59	1450		46.52	1682			45.85	762		46.39	802		46	512		46.16	346
46.77	793		46.85	1545		47.09	1013		47.56	585		47.34	667		47.06	1031			47.7	1491		47.33	1993		46.89	1658		46.99	1357		46.76	1455		46.74	1683			46.03	774		46.25	785		46.16	513		46.27	347
47.04	782		46.99	1536		47.29	1013		47.73	577		47.58	663		47.16	1019			47.88	1510		47.54	1988		46.94	1660		47.11	1350		46.94	1445		46.97	1682			46.3	760		46.71	791		46.32	511		46.71	351
47.2	791		47.1	1514		47.48	1004		47.9	567		47.79	657		47.49	1010			48.04	1505		47.86	1994		47.27	1662		47.36	1358		47.15	1444		47.27	1678			46.55	782		46.89	787		46.49	502		46.72	347
47.4	802		47.38	1506		47.7	978		48.13	557		47.96	650		47.67	999			48.28	1520		48	1980		47.49	1640		47.54	1351		47.36	1442		47.42	1684			46.6	773		46.93	784		46.67	502		46.78	350
47.62	804		47.54	1495		47.9	982		48.31	561		48.13	643		47.86	992			48.44	1525		48.2	1980		47.62	1641		47.79	1350		47.6	1444		47.72	1678			46.95	775		47.27	772		47.06	497		47.33	356
47.82	809		47.81	1481		48.11	975		48.5	543		48.36	641		48.11	985			48.68	1521		48.35	1983		47.77	1643		47.99	1329		47.81	1430		47.77	1679			47.11	759		47.2	781		47.35	495		47.2	338
48.02	781		47.99	1486		48.29	958		48.71	542		48.54	637		48.27	977			48.83	1513		48.56	1975		48.06	1628		48.24	1342		48.02	1443		48.04	1669			47.16	761		47.49	769		47.52	482		47.6	347
48.22	782		48.2	1469		48.54	936		48.95	519		48.82	628		48.45	970			48.95	1517		48.73	1967		48.27	1629		48.38	1347		48.18	1451		48.09	1660			47.4	763		47.67	760		47.49	490		47.97	347
48.42	785		48.44	1443		48.75	933		49.13	536		48.98	633		48.65	952			49.07	1524		48.92	1971		48.46	1625		48.69	1335		48.41	1442		48.52	1658			47.73	760		47.99	756		47.68	472		47.87	346
48.61	775		48.59	1438		48.95	920		49.45	533		49.22	634		48.88	946			49.36	1520		49.17	1966		48.74	1614		48.77	1319		48.73	1444		48.71	1657			48.24	743		48.24	739		47.97	471		48.14	346
48.9	790		48.84	1419		49.17	903		49.63	513		49.38	622		49.13	930			49.67	1527		49.34	1954		48.97	1617		49.05	1319		48.71	1435		48.81	1662			48.27	741		48.5	733		48.05	472		48.45	343
49.1	767		49.03	1401		49.38	903		49.84	504		49.6	624		49.27	930			49.86	1538		49.55	1948		49.03	1602		49.16	1311		49	1428		48.92	1659			48.56	729		48.7	724		48.45	458		48.65	335
49.22	776		49.23	1407		49.54	899		49.99	505		49.77	594		49.52	918			49.92	1530		49.75	1948		49.24	1593		49.35	1301		49.13	1435		49.2	1648			48.48	726		48.75	719		48.39	460		48.81	336
49.42	772		49.47	1373		49.74	872		50.17	505		49.94	599		49.72	908			50.22	1528		49.99	1946		49.57	1588		49.55	1313		49.27	1434		49.31	1649			49.02	716		49	704		48.88	459		48.97	324
49.6	744		49.71	1371		49.89	852		50.39	489		50.11	585		49.86	894			50.49	1527		50.17	1939		49.6	1573		49.67	1303		49.6	1416		49.42	1630			48.74	720		49.27	698		48.69	444		49.2	325
49.75	769		49.81	1338		50.11	837		50.58	489		50.37	582		50.1	881			50.67	1525		50.34	1932		49.79	1567		49.88	1282		49.67	1423		49.8	1642			49.27	715		49.41	689		49.2	443		49.47	315
49.94	758		49.96	1313		50.26	831		50.77	477		50.56	582		50.27	871			50.98	1534		50.56	1929		50.02	1568		50.1	1283		49.84	1417		49.9	1631			49.4	696		49.62	670		49.13	434		49.73	321
50.12	759		50.15	1311		50.49	819		50.93	475		50.78	595		50.49	846			51.09	1531		50.7	1916		50.27	1544		50.38	1281		50.17	1404		50.19	1632			49.43	692		49.79	655		49.42	427		49.92	318
50.41	732		50.42	1284		50.74	821		51.13	463		50.91	574		50.68	834			51.16	1534		51.08	1913		50.53	1539		50.49	1291		50.37	1412		50.44	1626			49.63	675		49.99	653		49.61	425		50.02	311
50.54	735		50.6	1264		50.88	796		51.35	456		51.09	557		50.84	823			51.42	1532		51.18	1906		50.84	1542		50.88	1284		50.64	1402		50.64	1608			50.11	671		50.14	634		49.87	409		50.26	311
50.79	735		50.78	1252		51.08	787		51.61	440		51.35	570		51.09	795			51.69	1520		51.45	1891		50.95	1527		50.96	1269		50.81	1397		50.85	1615			49.99	652		50.42	622		50.15	403		50.47	299
51.03	735		50.98	1237		51.29	774		51.81	449		51.51	570		51.21	816			51.81	1533		51.6	1889		51.12	1511		51.17	1263		51.02	1385		50.93	1609			50.53	648		50.56	632		50.28	396		50.62	303
51.23	730		51.18	1220		51.46	755		51.99	449		51.71	548		51.52	793			52	1507		51.87	1887		51.38	1503		51.4	1250		51.17	1400		51.27	1613			50.54	630		50.81	600		50.42	382		50.74	295
51.42	711		51.43	1199		51.71	735		52.17	424		51.96	547		51.76	777			52.16	1514		51.96	1871		51.49	1504		51.58	1248		51.4	1374		51.49	1591			50.49	628		51.06	575		50.64	376		51.04	285
51.63	704		51.52	1172		51.99	734		52.38	429		52.2	540		51.93	762			52.38	1507		52.2	1860		51.63	1481		51.77	1253		51.56	1372		51.7	1586			50.96	620		51.27	573		50.76	382		51.19	289
51.78	686		51.83	1158		52.16	725		52.61	418		52.38	525		52.05	742			52.61	1512		52.38	1857		51.87	1476		51.92	1249		51.73	1376		51.85	1588			51.21	581		51.52	560		50.85	359		51.51	277
52.03	696		51.99	1135		52.31	699		52.77	409		52.6	524		52.28	736			52.87	1510		52.53	1836		52.05	1472		52.12	1218		51.92	1365		52.02	1577			51.27	585		51.53	550		51.09	365		51.68	282
52.17	683		52.23	1109		52.54	692		52.91	408		52.77	506		52.53	732			52.96	1511		52.84	1843		52.27	1438		52.28	1212		52.14	1373		52.24	1567			51.71	579		51.78	540		51.34	352		51.81	282
52.36	675		52.28	1095		52.7	669		53.22	404		52.98	506		52.71	713			53.24	1510		52.95	1823		52.41	1430		52.47	1209		52.31	1365		52.41	1559			51.75	563		52	509		51.76	349		52.06	274
52.59	666		52.59	1062		52.87	656		53.39	390		53.17	506		52.89	698			53.37	1494		53.28	1823		52.68	1420		52.76	1207		52.52	1351		52.45	1554			51.91	550		52.31	499		51.94	342		52.34	266
52.73	654		52.81	1044		53.09	653		53.5	376		53.34	490		53.04	678			53.74	1491		53.44	1804		52.94	1405		52.92	1190		52.74	1334		52.8	1542			52.06	537		52.51	492		51.95	325		52.6	272
52.99	638		52.92	1013		53.27	626		53.72	375		53.49	490		53.26	668			53.82	1494		53.64	1794		53.06	1404		53.17	1170		52.94	1346		52.85	1543			52.35	501		52.74	482		52.11	321		52.73	258
53.13	637		53.17	993		53.42	627		53.99	365		53.7	482		53.46	666			54.07	1484		53.77	1777		53.14	1377		53.31	1162		53.17	1340		53.2	1514			52.45	499		52.94	467		52.42	312		53.11	259
53.35	621		53.36	984		53.72	606		54.14	371		53.92	469		53.63	642			54.23	1484		54.06	1774		53.5	1383		53.54	1147		53.28	1324		53.39	1524			52.45	495		53.21	448		52.71	307		53.1	255
53.48	621		53.55	962		53.82	595		54.33	350		54.09	474		53.85	642			54.35	1463		54.14	1763		53.66	1341		53.74	1152		53.55	1321		53.57	1504			52.73	475		53.34	441		52.86	296		53.33	247
53.82	602		53.71	939		54.1	574		54.5	350		54.24	462		54.02	613			54.62	1465		54.46	1744		53.79	1346		53.96	1136		53.77	1312		53.7	1502			53.17	464		53.67	428		53.11	303		53.45	252
53.96	600		53.96	920		54.23	565		54.81	342		54.57	445		54.27	593			54.84	1457		54.62	1745		54.02	1333		54.12	1134		53.99	1297		53.99	1485			53.17	455		53.87	404		53.37	289		53.64	243
54.2	569		54.18	886		54.45	556		54.98	349		54.77	436		54.42	591			55.03	1465		54.82	1732		54.3	1308		54.27	1128		54.14	1307		54.22	1470			53.22	432		53.81	402		53.57	283		54.11	243
54.33	567		54.4	876		54.68	545		55.17	343		54.84	428		54.63	571			55.33	1451		55	1711		54.47	1293		54.65	1120		54.39	1288		54.38	1472			53.79	419		54.06	388		53.81	282		54.05	234
54.55	548		54.53	848		54.83	534		55.36	337		55.19	433		54.77	566			55.38	1441		55.17	1697		54.68	1277		54.72	1104		54.57	1282		54.62	1466			53.99	405		54.16	370		53.95	279		54.27	232
54.8	549		54.77	836		55.08	523		55.48	331		55.39	423		54.99	546			55.54	1426		55.42	1670		54.92	1271		54.93	1093		54.77	1275		54.83	1449			54.16	383		54.42	364		54.09	269		54.75	231
54.96	537		55.01	803		55.27	506		55.79	325		55.52	413		55.19	543			55.81	1430		55.6	1660		55.18	1246		55.08	1077		54.91	1259		55.02	1430			54.29	379		54.6	354		54.3	268		54.93	231
55.17	527		55.13	778		55.48	485		55.93	325		55.79	394		55.41	517			55.9	1422		55.81	1649		55.19	1225		55.31	1067		55.08	1246		55.21	1435			54.37	366		54.86	351		54.46	257		54.86	232
55.38	501		55.38	762		55.77	477		56.2	313		56.09	396		55.63	502			56.13	1421		55.93	1638		55.49	1215		55.55	1056		55.33	1238		55.38	1413			54.77	363		54.79	329		54.65	250		55.29	232
55.67	503		55.54	725		55.88	476		56.31	320		56.17	381		55.85	481			56.38	1409		56.09	1617		55.67	1189		55.81	1050		55.61	1240		55.52	1403			54.85	352		55.11	317		54.85	261		55.22	220
55.77	486		55.79	724		56.06	474		56.53	321		56.35	380		55.98	492			56.51	1393		56.28	1613		55.89	1183		55.95	1032		55.76	1215		55.81	1391			55.02	350		55.36	324		55.2	252		55.46	231
55.98	469		55.95	698		56.25	460		56.68	314		56.53	372		56.19	484			56.78	1375		56.63	1592		56.04	1166		56.07	1032		55.92	1217		55.97	1396			55.24	326		55.81	303		55.35	247		55.95	216
56.19	460		56.14	680		56.44	439		56.92	305		56.7	368		56.41	466			56.92	1373		56.78	1571		56.17	1153		56.35	1000		56.24	1211		56.17	1361			55.41	316		55.71	300		55.55	235		55.74	225
56.42	450		56.38	668		56.69	422		57.16	298		56.88	371		56.61	450			57.12	1364		56.92	1558		56.4	1129		56.58	1015		56.38	1190		56.35	1357			55.62	312		56.18	291		55.74	230		56.25	218
56.52	440		56.54	646		56.81	419		57.36	304		57.15	341		56.84	437			57.41	1350		57.15	1543		56.59	1121		56.67	993		56.52	1183		56.61	1350			55.85	311		56.12	282		55.89	233		56.4	220
56.77	434		56.78	631		57.02	425		57.5	297		57.33	351		57.04	437			57.51	1332		57.33	1512		56.94	1086		56.9	983		56.74	1168		56.71	1317			56.04	289		56.54	280		56.15	235		56.38	209
57.02	410		57	603		57.31	404		57.72	293		57.51	345		57.23	432			57.78	1329		57.53	1482		57.08	1084		57.1	973		56.89	1161		56.89	1310			56.25	300		56.67	272		56.24	229		56.58	205
57.15	411		57.15	583		57.43	405		57.89	295		57.74	333		57.42	407			58.08	1308		57.74	1485		57.27	1073		57.35	949		57.14	1149		57.07	1316			56.56	286		56.76	274		56.56	223		56.6	216
57.42	406		57.32	582		57.62	380		58.04	292		57.89	330		57.68	407			58.17	1315		57.95	1476		57.51	1048		57.51	956		57.33	1138		57.38	1298			56.48	272		57.14	262		56.7	225		56.89	203
57.56	380		57.64	555		57.82	377		58.26	296		58.1	321		57.82	400			58.46	1298		58.14	1452		57.52	1018		57.79	932		57.51	1136		57.56	1279			56.78	274		57.2	262		56.96	224		57.06	210
57.78	378		57.74	542		57.96	377		58.49	281		58.3	331		58.02	383			58.61	1271		58.36	1425		57.85	1016		57.89	921		57.74	1117		57.74	1262			56.92	258		57.4	251		57.12	231		57.54	213
57.98	365		57.94	527		58.17	357		58.72	291		58.54	313		58.26	372			58.97	1265		58.58	1410		58.04	991		58.07	913		58.04	1110		57.96	1237			57.24	263		57.49	250		57.2	221		57.76	212
58.1	359		58.12	513		58.49	356		58.87	294		58.72	306		58.38	368			59.1	1249		58.74	1394		58.22	977		58.31	915		58.07	1081		58.15	1217			57.33	254		57.74	243		57.53	222		57.62	217
58.26	351		58.45	491		58.6	356		59.1	294		58.9	313		58.66	373			59.13	1248		58.95	1370		58.36	966		58.53	881		58.28	1095		58.42	1214			57.59	253		57.95	247		57.82	214		58.04	209
58.56	342		58.61	479		58.88	347		59.27	287		59.13	298		58.81	349			59.55	1216		59.2	1334		58.67	932		58.67	870		58.51	1065		58.58	1206			58.12	249		58.28	239		57.81	212		57.95	208
58.79	334		58.77	462		58.97	326		59.43	291		59.27	304		59.1	336			59.69	1193		59.35	1333		58.84	931		58.89	847		58.82	1052		58.8	1189			58.2	247		58.38	238		58.18	224		58.4	212
58.92	318		58.98	445		59.2	336		59.67	285		59.47	294		59.2	351			59.82	1189		59.49	1302		58.97	914		59.13	850		58.95	1030		58.88	1168			58.34	234		58.6	234		58.17	216		58.64	206
59.17	317		59.15	442		59.47	321		59.9	297		59.65	285		59.44	332			59.96	1187		59.7	1291		59.29	894		59.34	834		59.08	1032		59.16	1158			58.74	233		58.71	234		58.66	217		58.84	203
59.31	306		59.36	420		59.65	329		60.14	287		59.88	287		59.64	335			60.17	1162		59.92	1279		59.47	886		59.44	827		59.38	1020		59.38	1133			58.67	232		59	235		58.64	213		58.94	213
59.55	306		59.54	427		59.85	310		60.27	284		60.11	285		59.85	323			60.45	1136		60.12	1254		59.57	841		59.74	817		59.54	1014		59.51	1133			58.85	229		59.28	226		58.72	214		59.1	210
59.75	295		59.73	400		60.06	315		60.52	291		60.31	281		60.02	321			60.65	1148		60.37	1241		59.85	847		59.94	800		59.73	983		59.77	1103			59.28	235		59.49	231		59.23	225		59.34	216
59.94	293		60.06	397		60.22	307		60.75	295		60.5	279		60.27	320			60.81	1108		60.52	1203		60.01	836		60.12	783		59.92	960		59.93	1084			59.29	227		59.6	228		59.52	213		59.56	202
60.13	290		60.12	388		60.49	297		60.96	288		60.73	283		60.38	313			61.04	1072		60.81	1178		60.24	815		60.35	774		60.12	962		60.16	1085			59.73	218		59.85	227		59.55	210		59.77	213
60.39	285		60.35	378		60.6	293		61.04	282		60.91	276		60.6	304			61.28	1057		60.91	1157		60.45	800		60.52	762		60.32	934		60.35	1057			59.6	229		60.11	225		59.52	215		60.06	218
60.58	281		60.58	365		60.78	291		61.28	294		61.07	286		60.81	311			61.38	1038		61.15	1153		60.71	777		60.73	745		60.47	939		60.59	1043			59.88	214		60.35	221		59.7	214		60.19	218
60.76	275		60.76	365		61.06	298		61.54	297		61.26	277		61.06	302			61.57	1021		61.38	1124		60.77	777		60.92	733		60.76	921		60.74	1037			60.1	226		60.27	221		60.17	205		60.48	208
60.91	277		60.97	355		61.2	288		61.72	292		61.49	266		61.18	292			61.76	1008		61.56	1098		61.02	752		61.13	730		60.94	889		60.91	985			60.12	212		60.66	228		60.24	218		60.63	213
61.13	264		61.22	350		61.44	284		61.88	299		61.7	271		61.41	284			61.93	981		61.74	1075		61.23	725		61.23	709		61.08	880		61.1	974			60.35	222		60.81	230		60.38	214		60.68	215
61.38	260		61.43	344		61.64	282		62.06	289		61.85	266		61.61	289			62.11	972		61.88	1047		61.35	717		61.42	692		61.26	858		61.31	967			60.67	215		60.93	222		60.81	219		60.94	212
61.61	252		61.6	324		61.75	276		62.31	296		62.12	261		61.85	288			62.49	968		62.13	1036		61.65	700		61.67	686		61.53	852		61.49	963			60.95	220		61.16	222		60.75	215		61.15	209
61.67	255		61.74	325		62.04	277		62.54	292		62.31	266		62.03	290			62.76	936		62.35	1011		61.82	690		61.92	664		61.67	841		61.75	933			60.99	218		61.45	228		60.95	210		61.43	211
61.86	256		62	321		62.17	281		62.74	289		62.49	273		62.2	281			62.87	920		62.49	994		61.96	657		62.06	651		61.91	828		61.93	919			61.46	226		61.59	220		61.12	213		61.67	212
62.08	248		62.12	312		62.45	269		62.9	289		62.7	265		62.38	271			62.96	891		62.74	973		62.31	652		62.27	652		62.11	802		62.06	912			61.38	215		61.77	220		61.27	212		61.9	208
62.31	249		62.37	300		62.69	271		63.08	290		62.87	259		62.54	278			63.2	847		62.88	935		62.35	635		62.56	643		62.35	791		62.39	870			61.56	210		61.98	211		61.81	217		61.93	214
62.56	243		62.56	307		62.8	270		63.3	294		63.13	263		62.81	268			63.35	853		63.18	937		62.62	613		62.7	642		62.56	794		62.52	859			61.8	216		62.2	216		61.85	210		62.27	219
62.71	247		62.77	297		63.05	269		63.5	298		63.27	260		62.99	271			63.59	817		63.31	894		62.81	606		62.95	618		62.76	760		62.74	847			61.96	210		62.38	222		62.14	209		62.63	215
63.01	242		62.96	303		63.25	277		63.7	299		63.48	269		63.17	266			63.84	805		63.53	884		63.03	586		63.08	604		62.95	757		62.91	839			62.49	210		62.58	219		62.06	211		62.59	210
63.14	248		63.08	297		63.45	271		63.81	300		63.72	269		63.4	270			64.16	795		63.77	857		63.19	574		63.29	594		63.14	730		63.22	797			62.4	204		62.95	220		62.51	219		62.95	216
63.35	231		63.3	291		63.61	269		64.11	300		63.92	259		63.56	272			64.22	770		63.9	849		63.33	557		63.47	579		63.38	719		63.3	789			62.87	209		63.2	206		62.67	209		63.13	224
63.55	234		63.53	292		63.79	267		64.3	302		64.06	259		63.8	267			64.45	756		64.2	809		63.66	550		63.64	563		63.56	697		63.47	767			62.85	206		63.24	218		62.71	212		63.47	207
63.71	240		63.68	296		64.03	259		64.5	304		64.29	267		64.03	263			64.53	746		64.31	811		63.82	530		63.92	555		63.79	680		63.72	758			62.93	209		63.43	224		62.98	209		63.66	214
63.88	234		63.82	279		64.21	260		64.69	293		64.51	269		64.16	266			64.76	716		64.56	776		64.01	525		63.98	559		63.95	665		63.95	734			63.17	218		63.64	216		63.18	212		63.72	211
64.19	235		64.12	291		64.37	265		64.98	297		64.71	260		64.34	259			64.98	689		64.8	763		64.24	494		64.29	532		64.12	665		64.17	728			63.47	208		63.88	209		63.53	204		64.13	211
64.31	237		64.24	285		64.56	261		65.16	302		64.88	263		64.62	262			65.14	672		64.95	737		64.4	498		64.5	523		64.31	633		64.3	716			63.57	198		64.09	209		63.69	204		64.13	213
64.48	226		64.51	278		64.85	263		65.33	295		65.06	262		64.77	261			65.38	656		65.17	719		64.54	483		64.7	519		64.48	619		64.53	698			63.82	211		64.38	212		63.9	210		64.5	214
64.66	241		64.69	279		64.96	265		65.54	299		65.32	255		64.92	256			65.64	626		65.35	692		64.8	475		64.9	510		64.74	622		64.74	692			63.97	211		64.45	212		64.02	213		64.37	214
64.88	229		64.9	275		65.16	265		65.67	293		65.45	270		65.2	259			65.88	611		65.51	675		64.98	459		65.1	508		64.92	602		64.83	659			64.3	204		64.8	216		64.24	210		64.63	209
65.04	234		65.06	284		65.41	256		65.9	294		65.65	268		65.41	259			65.93	605		65.8	665		65.24	443		65.24	479		65.08	604		65.09	659			64.27	207		64.71	213		64.38	207		64.76	208
65.27	238		65.25	282		65.52	255		66.04	295		65.85	250		65.65	257			66.02	566		65.93	647		65.43	441		65.53	473		65.29	584		65.35	637			64.66	196		64.93	213		64.52	201		65	211
65.55	231		65.49	288		65.77	260		66.26	295		66.06	261		65.81	261			66.31	565		66.15	627		65.65	434		65.7	477		65.53	567		65.51	631			64.9	205		65.23	211		64.74	211		65.16	211
65.7	224		65.72	283		66.05	252		66.52	288		66.26	254		66.01	253			66.5	537		66.26	593		65.75	418		65.92	467		65.67	544		65.74	610			65.02	213		65.38	215		64.88	202		65.65	203
65.94	234		65.82	270		66.17	262		66.7	299		66.39	266		66.15	247			66.84	521		66.56	580		66.02	405		66.07	456		65.82	533		65.93	589			65.19	217		65.56	214		65.16	204		65.53	207
66.05	229		66.07	270		66.39	246		66.87	288		66.68	252		66.38	251			67.04	507		66.74	560		66.2	401		66.26	439		66.06	519		66.17	581			65.41	209		65.78	214		65.27	214		65.96	207
66.35	232		66.27	271		66.6	256		67.06	294		66.84	249		66.6	244			67.16	498		66.9	546		66.35	392		66.46	447		66.33	506		66.3	572			65.7	208		66.12	216		65.73	213		66.06	210
66.46	233		66.52	283		66.78	250		67.24	286		67.11	250		66.82	252			67.38	480		67.19	540		66.6	380		66.82	438		66.56	511		66.46	566			65.75	207		66.12	220		65.75	211		66.25	207
66.71	235		66.73	274		66.99	250		67.45	279		67.22	260		67	243			67.63	453		67.31	540		66.74	363		66.87	422		66.76	490		66.66	550			66.1	208		66.5	213		66.02	208		66.36	214
66.85	234		66.92	286		67.16	251		67.6	291		67.42	250		67.16	244			67.67	443		67.49	506		66.95	360		67.02	406		66.84	482		66.94	525			66.23	210		66.56	213		66.3	207		66.52	212
67.09	224		67.09	275		67.38	244		67.86	282		67.64	249		67.42	249			67.77	425		67.74	497		67.09	350		67.3	395		67.13	460		67.09	516			66.39	210		66.96	217		66.37	200		66.69	212
67.31	226		67.29	276		67.56	241		68.03	281		67.88	240		67.59	244			68.17	427		67.88	487		67.43	349		67.45	403		67.29	459		67.3	498			66.88	205		66.96	212		66.52	212		66.85	216
67.52	226		67.5	275		67.77	242		68.25	273		68.1	244		67.79	239			68.4	402		68.1	477		67.53	328		67.67	387		67.49	441		67.49	508			66.97	210		67.18	216		66.82	223		67.2	212
67.69	222		67.72	280		67.94	242		68.45	277		68.23	244		67.97	236			68.6	400		68.31	449		67.77	325		67.84	375		67.67	433		67.66	488			67.02	215		67.31	214		67.19	207		67.26	209
67.89	224		67.93	282		68.17	238		68.64	278		68.47	237		68.15	240			68.87	376		68.52	435		68.05	315		68.17	371		67.88	416		67.88	473			67.37	210		67.51	215		67.34	213		67.77	207
68.1	221		68.03	268		68.36	237		68.85	265		68.7	234		68.38	233			68.98	371		68.77	425		68.15	307		68.35	373		68.09	399		68.04	473			67.39	217		67.79	218		67.5	205		67.66	226
68.24	221		68.31	276		68.6	243		69.03	269		68.85	238		68.55	237			69.19	353		68.97	409		68.37	304		68.44	362		68.25	401		68.31	447			67.53	208		68.17	220		67.81	214		68.01	215
68.52	216		68.56	268		68.77	234		69.27	271		69.04	228		68.74	245			69.28	334		69.13	393		68.58	297		68.64	354		68.5	396		68.5	434			67.91	208		68.15	220		68.05	214		68.36	209
68.68	211		68.71	266		68.93	235		69.5	264		69.32	240		68.92	227			69.52	333		69.3	389		68.74	290		68.85	345		68.7	387		68.69	431			68.02	213		68.52	228		68.12	222		68.25	211
68.95	222		68.89	270		69.11	237		69.63	262		69.45	228		69.07	229			69.75	322		69.46	382		68.99	287		68.99	343		68.85	385		68.85	420			68.25	217		68.79	218		68.28	210		68.49	210
69.13	217		69.05	274		69.32	223		69.85	261		69.7	243		69.31	222			70.05	316		69.75	372		69.15	281		69.32	329		69.06	374		69.09	412			68.74	205		68.76	222		68.63	213		68.74	221
69.33	208		69.3	265		69.55	235		70.01	258		69.88	222		69.54	228			70.17	302		69.87	350		69.37	278		69.42	325		69.2	353		69.27	409			68.74	221		68.88	234		68.58	213		69.07	218
69.48	212		69.5	269		69.73	222		70.24	245		70.03	229		69.74	219			70.42	290		70.11	350		69.63	264		69.74	325		69.47	354		69.54	395			68.95	222		69.2	220		68.69	221		69.03	215
69.73	198		69.73	263		69.91	228		70.44	249		70.27	220		70	218			70.57	293		70.33	332		69.79	257		69.95	306		69.63	336		69.73	383			69.17	219		69.37	232		69.28	212		69.27	221
69.93	202		69.97	267		70.14	222		70.53	253		70.46	222		70.2	219			70.76	270		70.49	311		69.91	255		69.99	304		69.81	323		69.91	385			69.24	223		69.75	229		69.27	219		69.68	224
70.09	202		70.08	270		70.39	220		70.85	251		70.67	219		70.41	212			70.91	266		70.7	306		70.12	250		70.28	303		70.08	323		70.08	371			69.52	223		69.8	236		69.3	218		69.75	225
70.31	203		70.35	265		70.52	216		71.04	244		70.88	214		70.53	223			71.27	262		70.78	305		70.39	241		70.59	305		70.31	319		70.27	357			69.55	222		69.97	232		69.71	219		69.93	226
70.49	205		70.58	265		70.79	213		71.23	239		70.99	210		70.78	216			71.42	243		71.2	290		70.66	237		70.65	295		70.47	306		70.49	356			69.98	225		70.15	230		69.95	227		70.14	212
70.66	198		70.73	252		70.95	213		71.42	222		71.24	209		70.88	216			71.52	238		71.34	285		70.78	238		70.85	290		70.69	300		70.67	356			70.2	220		70.34	233		70.12	228		70.36	223
70.86	202		70.99	257		71.17	217		71.67	243		71.47	206		71.14	210			71.63	233		71.49	276		70.99	239		71.14	283		70.87	296		70.88	350			70.14	228		70.44	237		70.38	228		70.53	224
71.12	189		71.13	261		71.39	216		71.81	235		71.57	210		71.31	213			71.94	232		71.71	269		71.06	236		71.31	280		70.98	284		71.06	347			70.53	229		70.87	248		70.46	232		70.74	229
71.2	194		71.29	257		71.55	216		72.02	223		71.81	202		71.53	204			72.08	217		71.88	256		71.29	221		71.49	275		71.23	284		71.2	326			70.57	230		70.74	244		70.63	237		70.95	235
71.48	190		71.47	266		71.72	216		72.24	216		72.02	199		71.78	202			72.34	208		72.1	243		71.53	218		71.63	269		71.47	286		71.47	311			71.06	233		71.17	242		70.8	235		71.25	239
71.63	192		71.73	260		71.99	206		72.42	223		72.16	195		71.98	204			72.48	212		72.24	248		71.71	213		71.85	267		71.65	274		71.7	312			71.11	236		71.34	237		70.93	230		71.31	234
71.82	192		71.91	254		72.13	202		72.61	228		72.37	201		72.17	213			72.61	195		72.45	240		71.95	217		71.99	268		71.83	262		71.88	294			71.11	240		71.61	244		71.23	234		71.6	241
72.03	191		72.1	253		72.35	209		72.75	227		72.62	205		72.35	200			72.88	189		72.73	245		72.08	203		72.13	264		72.03	265		72.07	290			71.31	243		71.83	248		71.31	238		71.77	229
72.26	195		72.27	262		72.56	200		73	217		72.85	191		72.56	197			73.1	185		72.88	230		72.37	208		72.54	265		72.24	262		72.29	289			71.78	230		71.85	251		71.61	243		71.99	239
72.45	201		72.49	261		72.73	202		73.24	213		73.01	192		72.79	197			73.24	188		72.94	224		72.52	203		72.69	247		72.49	252		72.41	294			71.99	236		72.02	255		71.86	238		72.19	244
72.63	200		72.7	248		72.94	202		73.41	211		73.22	199		72.92	195			73.56	185		73.26	224		72.78	209		72.88	250		72.65	248		72.7	276			72.1	240		72.36	250		72.02	240		72.4	244
72.88	199		72.88	258		73.13	196		73.6	215		73.42	191		73.17	195			73.74	172		73.47	223		72.94	185		73.02	245		72.87	246		72.86	278			72.36	243		72.67	255		72.18	246		72.61	250
73.13	200		73.03	256		73.33	203		73.82	208		73.61	193		73.35	198			73.87	167		73.61	215		73.17	193		73.22	251		73.05	237		73.02	262			72.26	250		72.7	258		72.4	240		73.01	260
73.25	196		73.24	253		73.54	199		73.96	216		73.81	185		73.54	192			74.17	169		73.85	213		73.38	186		73.44	236		73.31	226		73.27	258			72.77	248		72.88	260		72.65	246		73.09	242
73.45	198		73.41	254		73.76	208		74.24	203		73.99	195		73.72	202			74.29	159		74.13	201		73.58	190		73.63	231		73.45	216		73.56	250			72.65	250		73.26	255		72.73	249		73.25	254
73.64	208		73.62	262		73.85	202		74.36	216		74.15	194		73.93	198			74.59	159		74.41	202		73.79	182		73.85	246		73.67	221		73.69	247			73.15	252		73.43	273		72.95	253		73.64	254
73.88	207		73.85	257		74.15	209		74.61	208		74.42	199		74.13	194			74.8	162		74.52	202		73.85	191		74.05	224		73.88	218		73.9	241			73.07	258		73.59	269		73.1	258		73.47	258
74.02	208		74.07	259		74.31	205		74.85	211		74.6	186		74.36	190			74.95	152		74.6	193		74.1	180		74.33	224		74.05	202		74.06	235			73.34	250		73.87	271		73.38	254		73.74	260
74.24	216		74.2	260		74.52	196		75.03	213		74.79	198		74.56	199			75.08	145		74.81	188		74.4	185		74.53	233		74.18	191		74.29	239			73.44	264		74.1	275		73.64	257		74	266
74.44	208		74.45	260		74.71	208		75.28	216		74.98	185		74.72	201			75.31	144		75.08	182		74.55	185		74.76	210		74.43	189		74.48	229			73.64	262		74.2	277		73.68	268		74.1	268
74.71	209		74.64	265		74.89	206		75.45	216		75.17	192		74.95	193			75.47	143		75.26	177		74.7	183		74.8	214		74.71	184		74.68	229			73.85	262		74.55	275		73.88	261		74.65	268
74.93	209		74.84	271		75.13	204		75.62	208		75.45	189		75.12	189			75.75	140		75.56	180		74.93	175		74.91	208		74.84	168		74.85	215			74.02	270		74.67	275		74.27	267		74.57	267
75.07	218		75.01	269		75.29	201		75.81	219		75.68	196		75.32	197			75.78	136		75.7	174		75.13	173		75.19	209		75.01	164		75.07	224			74.25	268		74.97	280		74.33	267		74.74	285
75.23	216		75.16	271		75.53	213		76	226		75.85	201		75.55	199			76.06	128		75.87	164		75.25	170		75.51	207		75.23	156		75.24	210			74.55	277		75.24	290		74.6	269		75.25	279
75.4	219		75.42	271		75.7	214		76.21	220		75.99	205		75.72	200			76.19	124		76.12	169		75.57	167		75.74	206		75.42	154		75.49	205			74.8	273		75.34	278		74.68	271		75.12	279
75.67	230		75.56	278		75.88	213		76.42	225		76.2	192		75.88	202			76.51	115		76.17	158		75.63	163		75.85	199		75.73	148		75.67	206			74.87	278		75.62	288		74.87	291		75.42	285
75.92	232		75.81	282		76.1	212		76.6	222		76.45	202		76.06	207			76.73	113		76.45	150		75.95	164		76.03	201		75.88	140		75.83	197			75.15	285		75.77	289		75.12	275		75.51	292
76.04	238		76.06	287		76.35	216		76.89	224		76.63	207		76.31	199			76.92	109		76.66	151		76.13	155		76.24	204		76.14	134		75.96	199			75.39	289		75.74	291		75.38	283		75.81	277
76.22	239		76.19	287		76.56	217		77.02	232		76.84	204		76.53	207			77.13	103		76.79	146		76.32	158		76.35	181		76.19	133		76.22	195			75.42	296		75.92	298		75.49	286		75.83	288
76.43	240		76.43	294		76.77	220		77.18	237		77.05	209		76.68	213			77.31	106		77.06	139		76.5	150		76.58	182		76.4	131		76.47	200			75.77	294		76.1	293		75.8	291		76.2	294
76.6	253		76.6	291		76.87	228		77.34	233		77.13	214		76.85	208			77.51	96		77.38	133		76.68	144		76.88	177		76.6	126		76.65	190			76.04	302		76.42	301		75.95	299		76.39	301
76.78	253		76.82	293		77.13	232		77.6	241		77.48	223		77.14	211			77.67	103		77.52	131		76.84	146		77.04	176		76.84	121		76.79	183			76.2	295		76.48	297		76.22	292		76.56	302
76.99	259		77.12	302		77.35	232		77.81	243		77.59	221		77.31	212			77.93	94		77.7	129		77.1	135		77.27	173		77.02	114		76.99	191			76.47	302		76.86	305		76.4	299		76.71	309
77.25	262		77.26	308		77.55	240		78.01	231		77.82	220		77.5	216			78.1	88		77.82	127		77.35	130		77.45	161		77.21	106		77.28	183			76.52	315		76.87	309		76.53	308		76.99	313
77.41	281		77.45	315		77.77	234		78.21	253		77.99	230		77.69	225			78.26	97		77.95	118		77.59	130		77.68	154		77.45	108		77.4	179			76.73	303		77.07	314		76.82	308		77.26	309
77.62	276		77.66	306		77.98	250		78.47	241		78.27	234		77.93	217			78.46	86		78.18	120		77.68	126		77.88	150		77.64	102		77.62	181			77.07	310		77.31	310		77.02	303		77.23	310
77.91	282		77.91	312		78.13	245		78.6	247		78.42	232		78.13	227																		77.82	175			77.1	312		77.43	318		77.31	317		77.74	302
78.08	284		78.01	320		78.3	258		78.84	263		78.63	236		78.33	234																						77.45	322		77.65	319		77.52	313		77.69	314
78.22	296		78.18	327		78.49	262		79.09	259		78.79	248		78.49	234																						77.52	324		77.88	327		77.63	320		77.9	327
78.44	292		78.47	333		78.7	258		79.17	261		79.02	245		78.77	237																						77.81	320		77.98	324		77.95	319		78.12	329
78.67	310		78.55	338		78.91	262		79.33	268		79.24	254		78.91	247																						77.87	327		78.21	334		78.1	322		78.26	324

[truncated: 4 more columns]
