# Supplementary material for: Impact of energy limitations on function and resilience in long-wavelength Photosystem II
Source: eLife. 2022 Jul 19;11:e79890. doi: 10.7554/eLife.79890 (PMC9439682; doi:10.7554/eLife.79890)
Supplement: Appendix 5—figure 1—source data 1. [file elife-79890-app5-fig1-data1.xlsx]

## Sheet: A. marina
Replicate 1					Replicate 2					Replicate 3
ms	10°C	20°C	30°C		ms	10°C	20°C	30°C		ms	10°C	20°C	30°C
570	1169	1818	2198		571	1099	1799	2226		570	1661	2260	2381
670	1178	1821	2169		671	1119	1811	2209		670	1679	2260	2370
770	1186	1791	2143		771	1101	1778	2181		770	1674	2245	2346
870	1156	1761	2084		871	1072	1735	2144		870	1637	2221	2324
970	1129	1728	2038		971	1041	1693	2096		970	1613	2189	2284
1070	1116	1679	1983		1071	1010	1643	2048		1070	1585	2162	2251
1170	1091	1631	1930		1171	988	1598	1999		1170	1556	2123	2212
1270	1069	1587	1867		1271	964	1570	1949		1270	1533	2091	2173
1370	1017	1524	1801		1371	944	1528	1904		1370	1499	2055	2128
1470	1032	1499	1759		1471	927	1474	1854		1470	1473	2023	2080
1570	1000	1451	1684		1571	899	1442	1791		1570	1438	1994	2037
1670	968	1390	1639		1671	892	1392	1757		1670	1407	1962	1985
1770	965	1346	1588		1771	867	1355	1705		1770	1415	1913	1932
1870	931	1319	1533		1871	852	1331	1676		1870	1348	1887	1879
1970	928	1280	1484		1971	835	1296	1603		1970	1353	1844	1830
2070	907	1245	1422		2071	812	1249	1575		2070	1331	1797	1793
2170	865	1199	1376		2171	798	1234	1528		2170	1289	1751	1724
2270	847	1184	1352		2271	782	1181	1470		2270	1256	1730	1670
2370	836	1132	1304		2371	770	1152	1425		2370	1223	1681	1639
2470	822	1078	1263		2471	757	1131	1389		2470	1216	1655	1589
2570	815	1060	1226		2571	724	1093	1341		2570	1220	1609	1554
2670	798	1031	1187		2671	722	1081	1321		2670	1193	1567	1507
2770	786	1008	1157		2771	687	1045	1283		2770	1155	1528	1453
2870	758	962	1140		2871	705	1018	1242		2870	1137	1492	1427
2970	745	940	1093		2971	676	977	1193		2970	1110	1451	1391
3070	712	904	1056		3071	669	974	1167		3070	1104	1434	1333
3170	733	899	1024		3171	668	923	1138		3170	1080	1392	1317
3270	720	866	975		3271	642	917	1097		3270	1062	1341	1261
3370	701	822	965		3371	631	897	1088		3370	1048	1350	1228
3470	669	807	921		3471	627	869	1034		3470	1027	1299	1188
3570	679	791	923		3571	624	844	1021		3570	1006	1279	1160
3670	666	759	890		3671	616	813	986		3670	993	1240	1127
3770	644	743	875		3771	597	806	962		3770	998	1202	1113
3870	621	739	842		3871	600	792	944		3870	958	1189	1077
3970	610	719	807		3971	563	761	895		3970	940	1172	1076
4070	616	681	815		4071	573	756	875		4070	927	1141	1013
4170	593	663	776		4171	559	727	865		4170	917	1105	992
4270	574	650	773		4271	537	715	830		4270	881	1088	972
4370	572	649	731		4371	528	680	824		4370	858	1025	947
4470	558	610	719		4471	527	678	791		4470	843	1033	912
4570	564	614	711		4571	533	664	757		4570	833	1000	900
4670	535	601	693		4671	515	642	754		4670	839	978	886
4770	516	585	673		4771	492	641	725		4770	838	968	851
4870	516	567	644		4871	494	615	697		4870	805	927	851
4970	527	554	625		4971	492	593	686		4970	799	892	827
5070	499	542	615		5071	470	597	684		5070	788	885	797
5170	495	535	630		5171	478	575	652		5170	765	857	796
5270	489	509	598		5271	466	566	648		5270	755	873	773
5370	483	502	576		5371	466	540	646		5370	749	833	761
5470	481	483	550		5471	460	539	609		5470	723	809	721
5570	462	487	563		5571	424	530	612		5570	704	799	735
5670	451	470	536		5671	434	521	593		5670	702	786	707
5770	455	462	533		5771	444	499	558		5770	681	768	684
5870	458	458	498		5871	430	490	564		5870	678	755	681
5970	434	455	515		5971	431	472	561		5970	685	745	648
6070	424	433	499		6071	403	468	528		6070	659	726	643
6170	413	427	504		6171	405	468	505		6170	649	720	620
6270	401	422	474		6271	421	438	512		6270	655	699	636
6370	400	412	461		6371	407	465	501		6370	624	678	617
6470	396	397	458		6471	392	434	483		6470	634	669	591
6570	401	387	449		6571	365	405	467		6570	628	647	581
6670	396	380	444		6671	381	434	465		6670	615	626	593
6770	381	378	432		6771	366	415	475		6770	577	631	539
6870	364	356	417		6871	367	390	441		6870	588	616	560
6970	362	369	428		6971	366	402	440		6970	581	609	546
7070	364	368	394		7071	356	380	416		7070	558	608	509
7170	356	351	399		7171	352	373	433		7170	578	593	516
7270	358	352	377		7271	344	381	417		7270	568	567	502
7370	341	328	390		7371	337	369	397		7370	542	568	506
7470	347	337	390		7471	341	366	410		7470	560	568	496
7570	339	333	376		7571	324	357	393		7570	527	544	473
7670	324	319	354		7671	343	339	374		7670	526	524	459
7770	310	305	344		7771	322	348	375		7770	522	535	453
7870	320	300	343		7871	326	330	363		7870	505	495	427
7970	313	305	332		7971	314	338	356		7970	481	502	439
8070	307	292	338		8071	305	314	364		8070	495	505	436
8170	304	294	316		8171	304	314	330		8170	503	489	426
8270	298	288	327		8271	309	311	335		8270	480	497	408
8370	304	285	323		8371	301	312	329		8370	485	484	395
8470	301	281	303		8471	286	289	319		8470	472	446	402
8570	299	278	288		8571	300	295	319		8570	457	457	389
8670	285	269	284		8671	290	289	301		8670	458	473	373
8770	287	280	288		8771	291	284	310		8770	448	432	379
8870	269	263	286		8871	270	285	295		8870	444	442	359
8970	281	259	280		8971	285	289	302		8970	436	444	369
9070	276	259	267		9071	278	270	299		9070	432	435	357
9170	267	248	277		9171	279	259	281		9170	426	412	362
9270	266	242	260		9271	274	261	283		9270	417	400	330
9370	268	233	258		9371	265	257	254		9370	403	392	348
9470	244	242	250		9471	253	257	267		9470	417	389	329
9570	243	227	256		9571	262	245	253		9570	395	413	316
9670	248	220	246		9671	256	243	268		9670	404	406	324
9770	241	225	247		9771	246	250	259		9770	397	393	306
9870	248	209	246		9871	241	241	256		9870	383	380	316
9970	216	201	239		9971	255	232	247		9970	379	387	310
10070	237	218	217		10071	251	232	253		10070	375	369	298
10170	226	217	232		10171	230	230	242		10170	358	363	295
10270	227	207	232		10271	237	226	241		10270	362	361	294
10370	226	205	215		10371	228	225	229		10370	371	354	281
10470	222	207	212		10471	226	227	230		10470	360	348	281
10570	217	212	210		10571	233	208	220		10570	351	332	274
10670	213	210	217		10671	213	210	215		10670	336	336	272
10770	225	200	205		10771	229	204	215		10770	341	330	262
10870	218	184	201		10871	217	201	209		10870	343	351	274
10970	212	191	190		10971	220	200	211		10970	352	317	259
11070	212	195	191		11071	227	197	208		11070	334	318	254
11170	202	189	182		11171	209	189	202		11170	320	325	253
11270	210	177	188		11271	214	191	198		11270	319	331	245
11370	202	178	183		11371	209	192	200		11370	320	297	236
11470	186	174	188		11471	203	184	203		11470	319	304	241
11570	198	176	179		11571	205	176	192		11570	304	299	245
11670	197	166	169		11671	192	176	191		11670	312	295	237
11770	189	171	172		11771	204	189	192		11770	306	281	240
11870	200	176	161		11871	194	170	179		11870	301	290	222
11970	188	167	173		11971	205	171	192		11970	311	292	217
12070	193	167	169		12071	193	174	191		12070	297	281	230
12170	193	164	163		12171	200	164	179		12170	292	277	210
12270	185	154	161		12271	192	169	162		12270	300	300	216
12370	172	156	154		12371	197	168	179		12370	281	287	200
12470	178	161	163		12471	176	170	165		12470	276	279	207
12570	188	154	158		12571	183	158	158		12570	273	259	202
12670	179	152	143		12671	180	157	163		12670	283	268	197
12770	170	150	155		12771	183	154	169		12770	261	257	205
12870	173	151	149		12871	178	156	164		12870	270	254	199
12970	166	142	139		12971	184	153	140		12970	262	244	204
13070	176	142	135		13071	177	146	159		13070	270	251	190
13170	161	135	145		13171	162	148	152		13170	257	255	174
13270	147	156	136		13271	171	146	159		13270	257	254	177
13370	147	138	134		13371	165	150	145		13370	254	250	189
13470	170	140	133		13471	164	145	160		13470	254	251	175
13570	161	146	128		13571	165	142	143		13570	252	247	183
13670	153	133	134		13671	161	140	147		13670	233	235	169
13770	165	129	122		13771	168	129	143		13770	245	248	175
13870	159	132	130		13871	166	133	141		13870	251	223	171
13970	151	133	114		13971	163	137	136		13970	240	229	171
14070	139	130	129		14071	159	136	134		14070	242	218	156
14170	138	128	126		14171	154	135	133		14170	233	224	162
14270	143	133	122		14271	157	123	136		14270	232	221	159
14370	151	122	115		14371	152	127	128		14370	239	216	159
14470	141	115	116		14471	156	121	134		14470	223	214	153
14570	145	119	120		14571	153	127	132		14570	220	224	148
14670	150	121	112		14671	149	113	119		14670	214	204	155
14770	144	112	110		14771	148	125	128		14770	225	199	149
14870	138	119	107		14871	158	131	129		14870	217	203	144
14970	136	112	107		14971	148	123	127		14970	216	204	138
15070	129	128	108		15071	147	127	121		15070	204	193	148
15170	132	113	107		15171	147	127	122		15170	205	196	141
15270	133	106	110		15271	143	117	113		15270	204	203	139
15370	129	114	104		15371	132	118	114		15370	207	208	136
15470	138	113	109		15471	147	113	111		15470	212	194	138
15570	128	114	103		15571	141	117	110		15570	194	188	138
15670	125	110	101		15671	125	110	113		15670	201	194	129
15770	130	112	97		15771	128	107	109		15770	192	188	128
15870	125	113	99		15871	124	114	115		15870	194	184	118
15970	132	104	96		15971	126	106	106		15970	180	182	133
16070	118	102	91		16071	125	102	107		16070	192	181	122
16170	124	103	94		16171	119	104	105		16170	197	174	117
16270	112	102	89		16271	124	110	106		16270	185	191	122
16370	116	106	90		16371	123	108	100		16370	185	178	120
16470	108	97	94		16471	117	96	101		16470	191	170	116
16570	116	95	87		16571	120	103	100		16570	182	167	121
16670	113	98	79		16671	116	95	96		16670	173	167	116
16770	113	98	89		16771	122	103	100		16770	190	179	113
16870	115	93	80		16871	119	97	92		16870	189	166	110
16970	109	100	89		16971	118	103	97		16970	174	159	108
17070	112	97	88		17071	119	95	96		17070	177	161	107
17170	108	100	86		17171	115	97	100		17170	165	172	108
17270	115	87	81		17271	120	95	96		17270	177	156	101
17370	102	96	80		17371	117	95	96		17370	164	153	98
17470	107	84	77		17471	114	88	92		17470	177	167	101
17570	104	89	82		17571	115	90	95		17570	169	154	97
17670	96	93	78		17671	109	90	92		17670	168	159	102
17770	105	93	85		17771	103	94	87		17770	159	150	102
17870	107	88	75		17871	115	90	91		17870	166	151	98
17970	98	85	77		17971	109	88	83		17970	163	153	94
18070	95	89	76		18071	112	84	79		18070	164	142	91
18170	95	83	72		18171	106	81	85		18170	156	147	83
18270	101	87	75		18271	98	89	84		18270	162	148	88
18370	95	83	71		18371	108	87	88		18370	165	146	92
18470	89	76	75		18471	104	85	88		18470	154	138	89
18570	105	83	68		18571	107	81	80		18570	154	141	89
18670	94	84	69		18671	99	76	86		18670	149	137	85
18770	106	74	68		18771	97	78	74		18770	151	135	86
18870	95	80	64		18871	98	78	79		18870	166	138	88
18970	96	83	72		18971	106	77	82		18970	148	134	83
19070	99	79	64		19071	104	73	81		19070	145	135	84
19170	91	80	66		19171	95	76	74		19170	146	132	86
19270	90	74	65		19271	94	79	77		19270	142	141	86
19370	99	73	62		19371	90	71	75		19370	136	135	79
19470	92	67	70		19471	103	69	73		19470	144	123	78
19570	83	73	67		19571	101	74	70		19570	146	134	84
19670	90	76	65		19671	103	76	76		19670	135	130	79
19770	86	71	59		19771	91	76	74		19770	146	133	76
19870	88	73	61		19871	95	75	71		19870	129	124	74
19970	83	67	57		19971	95	63	67		19970	141	133	72
20070	79	71	59		20071	97	65	68		20070	131	119	74
20170	84	72	59		20171	96	67	69		20170	134	125	69
20270	78	66	56		20271	89	70	70		20270	138	126	75
20370	89	75	58		20371	85	65	61		20370	132	122	68
20470	78	75	56		20471	85	70	70		20470	140	119	66
20570	79	60	54		20571	90	68	70		20570	135	119	75
20670	82	67	53		20671	85	64	65		20670	130	118	63
20770	77	69	57		20771	87	70	65		20770	143	112	53
20870	85	61	58		20871	92	68	63		20870	138	118	65
20970	76	65	52		20971	87	67	65		20970	131	102	69
21070	83	66	51		21071	82	64	64		21070	128	111	66
21170	82	65	54		21171	88	69	63		21170	120	111	69
21270	78	64	51		21271	87	63	63		21270	118	116	67
21370	74	56	51		21371	85	64	62		21370	124	109	61
21470	82	68	53		21471	86	68	58		21470	120	106	62
21570	76	62	50		21571	80	60	56		21570	125	103	63
21670	72	60	52		21671	77	61	63		21670	124	103	66
21770	76	62	49		21771	79	65	59		21770	115	104	61
21870	70	57	50		21871	76	68	54		21870	111	107	63
21970	71	56	47		21971	77	57	63		21970	121	111	61
22070	70	60	53		22071	76	57	59		22070	121	110	53
22170	76	55	49		22171	79	62	63		22170	112	106	62
22270	67	60	48		22271	80	57	54		22270	118	106	56
22370	76	58	53		22371	82	61	60		22370	111	99	54
22470	76	60	47		22471	75	62	51		22470	113	113	61
22570	74	55	49		22571	75	56	56		22570	104	101	57
22670	72	52	46		22671	78	59	60		22670	117	97	53
22770	69	60	50		22771	81	57	53		22770	115	94	60
22870	67	54	50		22871	75	56	55		22870	109	96	57
22970	63	55	43		22971	73	51	59		22970	112	95	55
23070	71	54	45		23071	73	55	54		23070	104	99	52
23170	67	54	46		23171	72	55	51		23170	107	96	50
23270	69	49	47		23271	69	52	57		23270	101	90	51
23370	67	49	45		23371	74	49	47		23370	109	98	46
23470	63	52	47		23471	70	52	56		23470	107	91	49
23570	63	59	42		23571	69	59	50		23570	100	94	53
23670	59	51	43		23671	76	47	53		23670	104	91	52
23770	59	56	41		23771	72	52	51		23770	111	87	47
23870	61	45	40		23871	67	46	51		23870	106	86	46
23970	68	53	46		23971	61	55	51		23970	100	88	50
24070	67	46	42		24071	66	55	52		24070	96	88	47
24170	56	52	42		24171	60	53	49		24170	96	90	46
24270	61	45	38		24271	64	51	50		24270	96	90	48
24370	63	49	42		24371	64	46	54		24370	101	86	51
24470	60	46	40		24471	71	53	45		24470	93	88	43
24570	64	45	36		24571	62	46	45		24570	104	97	47
24670	62	49	39		24671	64	47	49		24670	102	86	47
24770	63	45	38		24771	62	46	47		24770	104	79	45
24870	60	46	41		24871	68	50	52		24870	93	85	45
24970	58	44	44		24971	63	52	42		24970	91	79	44
25070	55	44	34		25071	62	49	48		25070	93	82	47
25170	58	43	37		25171	63	47	46		25170	89	85	47
25270	56	44	36		25271	59	43	43		25270	90	77	45
25370	60	45	35		25371	61	47	47		25370	94	79	38
25470	56	44	37		25471	65	53	44		25470	96	79	42
25570	59	46	33		25571	60	43	48		25570	89	69	46
25670	55	47	36		25671	60	44	40		25670	84	78	42
25770	59	44	33		25771	63	41	41		25770	87	76	39
25870	54	41	36		25871	59	42	38		25870	96	73	38
25970	57	45	41		25971	61	40	41		25970	90	83	43
26070	58	43	36		26071	65	49	41		26070	88	80	39
26170	57	37	35		26171	54	42	44		26170	88	72	41
26270	56	42	37		26271	58	43	41		26270	86	71	41
26370	53	40	36		26371	57	44	40		26370	89	67	42
26470	56	47	33		26471	53	44	39		26470	85	75	40
26570	58	40	32		26571	62	43	42		26570	84	72	40
26670	50	39	38		26671	54	37	37		26670	80	64	38
26770	49	43	33		26771	63	41	35		26770	77	66	42
26870	48	40	34		26871	54	43	43		26870	79	70	40
26970	53	45	39		26971	54	43	38		26970	77	66	38
27070	52	39	32		27071	59	41	45		27070	84	75	40
27170	54	42	36		27171	56	44	41		27170	75	73	33
27270	50	39	34		27271	54	44	36		27270	81	68	35
27370	49	42	32		27371	57	44	35		27370	81	69	37
27470	52	35	31		27471	61	39	39		27470	83	70	31
27570	53	35	34		27571	56	39	38		27570	71	70	38
27670	49	39	33		27671	48	43	42		27670	84	61	36
27770	48	39	33		27771	50	34	40		27770	79	64	35
27870	51	40	31		27871	49	40	42		27870	73	66	35
27970	54	37	36		27971	51	40	41		27970	82	63	35
28070	52	35	32		28071	56	37	38		28070	74	68	36
28170	51	37	31		28171	53	37	31		28170	80	66	33
28270	54	42	31		28271	52	41	35		28270	70	60	31
28370	52	36	32		28371	52	37	37		28370	81	64	31
28470	46	33	31		28471	52	38	33		28470	77	58	32
28570	50	33	30		28571	52	39	32		28570	79	62	31
28670	49	31	32		28671	51	36	36		28670	72	60	33
28770	49	36	28		28771	48	36	33		28770	74	61	34
28870	53	40	26		28871	55	34	38		28870	76	55	31
28970	50	36	30		28971	45	32	34		28970	73	55	33
29070	46	36	31		29071	47	36	38		29070	73	61	28
29170	44	32	29		29171	47	36	30		29170	72	60	35
29270	48	38	29		29271	52	35	35		29270	68	59	32
29370	45	34	29		29371	51	31	34		29370	72	57	30
29470	45	32	32		29471	44	36	32		29470	68	58	31
29570	40	32	31		29571	44	38	34		29570	69	57	30
29670	45	32	28		29671	49	36	34		29670	69	57	31
29770	41	32	26		29771	48	36	35		29770	69	60	31
29870	44	33	33		29871	43	35	33		29870	69	60	31
29970	43	27	25		29971	44	33	32		29970	66	61	26
30070	44	33	25		30071	53	30	32		30070	69	53	31
30170	44	33	29		30171	47	34	29		30170	62	57	28
30270	46	32	26		30271	46	33	30		30270	67	57	26
30370	37	36	26		30371	52	31	30		30370	68	54	26
30470	43	28	29		30471	43	32	29		30470	64	58	32
30570	43	33	25		30571	44	33	34		30570	58	58	31
30670	42	29	28		30671	43	35	27		30670	67	52	31
30770	45	29	28		30771	45	30	29		30770	67	64	32
30870	39	36	29		30871	48	30	28		30870	66	49	28
30970	43	32	27		30971	45	28	31		30970	67	54	27
31070	46	27	27		31071	48	30	33		31070	66	48	25
31170	40	31	28		31171	44	32	26		31170	65	54	27
31270	39	29	29		31271	50	33	29		31270	60	53	32
31370	39	29	28		31371	40	31	29		31370	62	55	23
31470	43	24	25		31471	44	31	28		31470	62	51	31
31570	38	29	25		31571	40	30	31		31570	60	50	26
31670	40	28	25		31671	43	29	30		31670	66	49	27
31770	40	26	24		31771	45	33	29		31770	57	53	27
31870	33	31	24		31871	42	30	28		31870	60	51	25
31970	39	31	28		31971	43	26	27		31970	55	47	27
32070	36	26	24		32071	37	29	29		32070	56	50	26
32170	41	32	24		32171	39	31	30		32170	64	42	29
32270	36	29	29		32271	40	29	27		32270	56	50	25
32370	39	29	27		32371	47	31	28		32370	56	45	26
32470	34	26	23		32471	41	32	28		32470	63	53	26
32570	35	27	30		32571	40	28	26		32570	56	46	29
32670	36	31	26		32671	45	26	30		32670	63	50	22
32770	34	28	27		32771	36	26	25		32770	54	48	24
32870	41	26	26		32871	37	34	27		32870	58	42	24
32970	36	24	26		32971	39	25	23		32970	49	46	26
33070	39	25	24		33071	37	28	21		33070	65	45	24
33170	36	29	27		33171	38	25	27		33170	61	44	30
33270	37	29	25		33271	35	26	24		33270	59	48	26
33370	30	26	25		33371	37	26	26		33370	61	46	25
33470	43	25	21		33471	37	32	26		33470	60	43	28
33570	40	28	25		33571	39	27	27		33570	60	43	25
33670	37	25	24		33671	37	25	25		33670	57	46	24
33770	37	30	21		33771	40	25	25		33770	53	45	29
33870	32	24	26		33871	34	27	28		33870	49	45	22
33970	38	28	21		33971	38	27	26		33970	55	41	26
34070	32	21	20		34071	33	24	22		34070	54	49	23
34170	34	29	23		34171	33	25	28		34170	57	41	25
34270	30	24	29		34271	38	30	23		34270	65	45	24
34370	32	24	25		34371	42	24	23		34370	56	44	26
34470	34	25	24		34471	34	25	28		34470	54	35	27
34570	30	27	24		34571	29	25	28		34570	57	40	23
34670	35	24	22		34671	35	31	22		34670	55	43	20
34770	37	29	23		34771	36	26	25		34770	57	38	25
34870	38	23	25		34871	32	23	25		34870	56	41	23
34970	31	23	23		34971	33	24	23		34970	53	41	25
35070	32	28	23		35071	35	21	20		35070	56	42	19
35170	34	27	22		35171	35	23	22		35170	50	35	21
35270	36	26	25		35271	35	24	24		35270	54	32	23
35370	34	22	22		35371	32	25	22		35370	55	41	22
35470	37	28	23		35471	36	23	22		35470	50	40	24
35570	34	22	24		35571	41	24	25		35570	52	38	21
35670	32	21	22		35671	37	24	23		35670	51	39	21
35770	35	22	21		35771	33	26	26		35770	50	37	18
35870	32	22	22		35871	33	24	22		35870	48	39	21
35970	33	24	19		35971	34	23	20		35970	50	38	24
36070	31	23	23		36071	32	27	20		36070	48	35	25
36170	26	19	21		36171	38	19	22		36170	51	39	20
36270	29	23	23		36271	30	26	23		36270	47	36	20
36370	31	20	23		36371	35	22	22		36370	57	39	22
36470	31	20	22		36471	31	25	23		36470	48	37	24
36570	32	23	21		36571	35	25	25		36570	47	38	19
36670	29	22	21		36671	36	20	25		36670	46	36	21
36770	30	22	25		36771	34	22	25		36770	50	33	21
36870	31	20	19		36871	33	23	25		36870	44	36	24
36970	30	25	20		36971	29	23	22		36970	43	32	23
37070	30	25	19		37071	30	22	25		37070	45	37	20
37170	28	23	24		37171	33	25	22		37170	45	32	22
37270	29	23	23		37271	28	21	20		37270	43	36	19
37370	28	22	18		37371	34	24	21		37370	47	36	18
37470	30	19	24		37471	29	24	21		37470	41	42	19
37570	29	18	17		37571	34	19	21		37570	44	35	21
37670	31	18	20		37671	31	23	20		37670	44	34	13
37770	31	23	22		37771	26	26	21		37770	44	36	21
37870	32	21	22		37871	32	17	21		37870	42	32	20
37970	29	24	21		37971	27	20	21		37970	52	31	22
38070	27	21	21		38071	30	22	17		38070	44	34	19
38170	32	21	20		38171	32	21	20		38170	51	37	20
38270	32	23	22		38271	29	22	22		38270	42	32	22
38370	25	22	23		38371	33	20	21		38370	47	35	19
38470	29	20	21		38471	26	21	18		38470	46	37	22
38570	28	20	22		38571	27	18	21		38570	44	29	22
38670	29	17	22		38671	26	24	23		38670	44	34	19
38770	25	19	22		38771	30	18	22		38770	40	33	15
38870	25	19	23		38871	31	21	22		38870	39	33	19
38970	26	20	16		38971	29	16	18		38970	42	37	22
39070	23	21	20		39071	30	22	21		39070	39	33	19
39170	27	21	18		39171	29	20	17		39170	43	37	20
39270	26	21	22		39271	27	17	19		39270	46	28	17
39370	32	18	22		39371	25	18	22		39370	43	30	19
39470	27	15	20		39471	25	20	20		39470	49	34	19
39570	26	16	21		39571	29	21	19		39570	48	33	21
39670	27	17	19		39671	26	21	18		39670	44	32	18
39770	32	19	18		39771	29	18	18		39770	38	29	20
39870	27	21	22		39871	32	19	17		39870	39	31	18
39970	30	19	19		39971	31	18	19		39970	40	26	17
40070	23	16	23		40071	25	18	19		40070	41	33	17
40170	26	17	19		40171	30	23	17		40170	45	27	18
40270	24	17	20		40271	26	19	21		40270	41	31	15
40370	24	19	18		40371	27	18	19		40370	43	30	21
40470	24	19	23		40471	28	17	17		40470	42	32	20
40570	29	18	21		40571	30	22	19		40570	36	27	19
40670	24	18	17		40671	30	18	18		40670	41	30	19
40770	20	17	17		40771	26	21	18		40770	39	28	18
40870	23	18	17		40871	23	17	23		40870	37	25	18
40970	23	19	20		40971	26	19	20		40970	41	28	19
41070	18	17	19		41071	26	19	21		41070	39	29	18
41170	26	17	20		41171	29	18	18		41170	37	28	18
41270	23	18	20		41271	29	17	20		41270	35	26	21
41370	24	17	17		41371	28	17	15		41370	37	30	23
41470	22	17	22		41471	24	18	20		41470	35	26	19
41570	23	17	18		41571	24	16	19		41570	35	27	20
41670	24	16	19		41671	31	18	23		41670	38	30	20
41770	23	17	18		41771	26	20	17		41770	33	28	18
41870	24	17	17		41871	28	16	14		41870	38	28	14
41970	20	14	16		41971	27	15	17		41970	40	28	21
42070	23	19	17		42071	25	16	18		42070	39	23	17
42170	23	18	21		42171	22	17	18		42170	35	29	19
42270	25	16	18		42271	23	13	15		42270	34	30	17
42370	26	17	18		42371	22	17	19		42370	33	27	18
42470	25	17	15		42471	22	16	17		42470	36	28	19
42570	25	18	20		42571	27	19	21		42570	36	27	16
42670	23	16	18		42671	25	20	18		42670	33	33	18
42770	22	17	18		42771	21	17	18		42770	34	25	15
42870	28	16	20		42871	23	16	17		42870	40	27	16
42970	23	16	20		42971	22	18	16		42970	34	29	17
43070	19	17	17		43071	24	18	17		43070	34	27	15
43170	29	14	18		43171	21	16	18		43170	34	23	19
43270	16	17	22		43271	22	16	18		43270	37	25	18
43370	20	17	22		43371	27	17	15		43370	30	27	17
43470	24	17	18		43471	25	17	17		43470	38	25	15
43570	21	13	20		43571	23	20	20		43570	37	23	17
43670	23	17	19		43671	23	16	17		43670	40	26	18
43770	20	17	18		43771	25	17	14		43770	36	25	19
43870	23	14	15		43871	19	13	18		43870	31	29	17
43970	20	16	17		43971	23	15	18		43970	31	27	19
44070	20	12	16		44071	19	15	19		44070	33	26	17
44170	22	18	18		44171	23	15	15		44170	31	24	17
44270	20	15	16		44271	27	14	16		44270	38	22	19
44370	23	18	19		44371	22	14	12		44370	37	28	17
44470	25	13	18		44471	20	17	20		44470	33	23	17
44570	18	16	16		44571	17	14	18		44570	34	21	18
44670	21	17	18		44671	22	15	17		44670	33	27	18
44770	21	16	20		44771	22	17	14		44770	34	24	14
44870	19	13	18		44871	24	13	16		44870	32	25	14
44970	22	14	18		44971	19	15	15		44970	30	21	13
45070	24	14	19		45071	21	16	17		45070	34	22	16
45170	18	13	17		45171	20	15	13		45170	31	25	19
45270	16	14	21		45271	19	15	13		45270	35	23	19
45370	20	13	15		45371	23	12	16		45370	36	22	16
45470	21	12	16		45471	20	14	13		45470	33	24	17
45570	20	16	18		45571	24	12	17		45570	32	22	17
45670	20	14	17		45671	23	19	19		45670	31	21	15
45770	25	18	19		45771	24	14	13		45770	33	23	18
45870	19	17	16		45871	23	14	15		45870	31	22	16
45970	19	12	18		45971	18	13	15		45970	31	23	14
46070	20	16	17		46071	21	15	16		46070	29	20	18
46170	20	15	16		46171	25	11	15		46170	29	23	18
46270	21	15	19		46271	23	15	17		46270	33	20	15
46370	23	15	19		46371	22	18	18		46370	32	21	15
46470	17	15	17		46471	17	15	15		46470	33	22	18
46570	19	13	16		46571	19	17	16		46570	31	23	16
46670	22	14	16		46671	19	13	16		46670	28	21	16
46770	24	14	16		46771	20	15	19		46770	30	19	16
46870	19	10	17		46871	21	13	17		46870	33	20	17
46970	22	13	14		46971	17	15	17		46970	29	21	17
47070	19	14	16		47071	24	18	14		47070	32	22	14
47170	20	16	17		47171	18	14	17		47170	30	24	13
47270	19	15	15		47271	22	16	17		47270	31	22	19
47370	16	18	20		47371	19	12	15		47370	33	23	16
47470	17	15	16		47471	21	13	14		47470	27	22	18
47570	18	14	18		47571	19	12	16		47570	26	21	16
47670	22	13	21		47671	21	14	16		47670	29	21	16
47770	20	13	17		47771	22	13	14		47770	24	19	14
47870	19	11	15		47871	19	9	16		47870	32	22	17
47970	20	12	19		47971	21	15	18		47970	29	17	15
48070	19	12	18		48071	21	12	12		48070	32	22	16
48170	19	14	15		48171	19	15	16		48170	25	20	17
48270	19	11	16		48271	19	13	14		48270	32	20	16
48370	18	11	18		48371	17	12	18		48370	29	17	19
48470	19	13	16		48471	19	14	14		48470	27	21	14
48570	18	12	18		48571	18	14	15		48570	28	16	17
48670	19	16	18		48671	20	15	15		48670	26	21	16
48770	20	12	16		48771	22	13	15		48770	31	17	14
48870	18	13	17		48871	17	13	15		48870	28	20	15
48970	15	13	18		48971	18	10	13		48970	29	20	15
49070	18	11	16		49071	20	12	14		49070	32	18	15
49170	17	14	16		49171	22	12	13		49170	25	18	13
49270	19	12	14		49271	19	15	13		49270	30	18	14
49370	19	14	17		49371	19	14	12		49370	32	19	14
49470	19	10	15		49471	16	13	14		49470	25	20	15
49570	15	10	17		49571	17	15	16		49570	27	16	16
49670	14	15	18		49671	19	14	12		49670	24	17	12
49770	16	14	17		49771	20	13	16		49770	27	22	15
49870	20	12	20		49871	20	13	15		49870	29	18	15
49970	18	13	16		49971	14	14	13		49970	27	17	16
50070	16	12	18		50071	21	14	15		50070	22	18	15
50170	16	13	18		50171	16	15	13		50170	28	18	18
50270	16	11	17		50271	19	13	13		50270	27	16	14
50370	14	12	20		50371	18	11	13		50370	32	16	13
50470	17	14	18		50471	21	12	14		50470	27	18	17
50570	16	11	15		50571	20	12	14		50570	22	17	16
50670	16	14	16		50671	18	11	13		50670	28	19	16
50770	17	11	16		50771	16	12	10		50770	25	17	18
50870	20	13	16		50871	18	10	15		50870	28	17	16
50970	15	12	14		50971	17	10	14		50970	28	18	14
51070	16	14	15		51071	19	11	16		51070	29	17	15
51170	17	13	16		51171	18	11	16		51170	23	21	13
51270	15	10	16		51271	18	17	13		51270	22	18	16
51370	15	13	16		51371	14	11	14		51370	29	18	16
51470	15	10	16		51471	14	12	17		51470	28	18	13
51570	16	12	16		51571	19	12	17		51570	27	19	17
51670	14	10	18		51671	19	12	13		51670	25	19	16
51770	17	12	16		51771	16	11	13		51770	22	19	16
51870	15	10	21		51871	16	11	12		51870	27	22	17
51970	14	9	15		51971	16	11	15		51970	24	16	17
52070	17	13	15		52071	15	13	12		52070	21	17	14
52170	15	11	20		52171	15	14	12		52170	22	18	16
52270	15	11	15		52271	15	12	15		52270	22	14	15
52370	17	10	17		52371	18	12	16		52370	24	14	13
52470	12	11	16		52471	18	12	16		52470	26	17	13
52570	18	11	18		52571	17	10	12		52570	26	17	13
52670	16	13	16		52671	17	9	11		52670	23	19	15
52770	16	14	15		52771	16	11	14		52770	21	14	14
52870	14	9	15		52871	10	11	13		52870	22	14	13
52970	15	13	17		52971	14	9	10		52970	24	17	12
53070	14	12	15		53071	17	10	11		53070	26	16	15
53170	12	12	17		53171	16	11	15		53170	27	15	13
53270	14	10	18		53271	15	11	12		53270	28	18	12
53370	12	13	14		53371	18	14	13		53370	20	14	14
53470	16	9	18		53471	13	12	16		53470	23	15	14
53570	17	11	13		53571	20	14	18		53570	25	18	14
53670	17	9	19		53671	13	12	14		53670	23	15	16
53770	17	8	18		53771	13	11	15		53770	17	15	12
53870	13	11	18		53871	15	11	16		53870	22	14	15
53970	14	10	18		53971	16	15	16		53970	22	14	14
54070	15	11	19		54071	18	12	14		54070	23	18	14
54170	13	7	17		54171	17	10	11		54170	26	13	13
54270	15	8	15		54271	15	12	13		54270	25	16	15
54370	12	10	14		54371	13	10	15		54370	20	15	15
54470	15	9	16		54471	18	12	14		54470	21	15	16
54570	17	14	17		54571	14	9	14		54570	24	13	17
54670	14	11	14		54671	18	11	13		54670	23	13	16
54770	13	12	15		54771	14	10	12		54770	23	17	13
54870	14	6	16		54871	17	12	15		54870	21	15	13
54970	11	10	13		54971	17	10	13		54970	22	12	14
55070	15	11	15		55071	15	9	12		55070	26	16	16
55170	15	12	16		55171	14	10	16		55170	21	16	13
55270	15	9	15		55271	17	9	15		55270	20	17	15
55370	15	9	16		55371	15	12	14		55370	22	13	13
55470	12	9	17		55471	12	10	11		55470	23	11	14
55570	17	9	14		55571	15	11	15		55570	21	16	13
55670	14	10	13		55671	14	9	11		55670	22	14	16
55770	16	11	18		55771	18	9	15		55770	21	15	11
55870	13	9	13		55871	16	13	12		55870	19	14	15
55970	13	9	17		55971	12	10	12		55970	20	18	14
56070	12	9	15		56071	16	10	13		56070	18	13	19
56170	14	11	13		56171	11	10	13		56170	21	15	13
56270	13	10	13		56271	15	7	12		56270	21	14	17
56370	13	12	14		56371	12	9	14		56370	20	14	16
56470	13	9	16		56471	14	11	13		56470	21	17	15
56570	14	10	16		56571	18	11	11		56570	19	16	13
56670	12	10	17		56671	12	8	14		56670	23	12	14
56770	16	10	16		56771	14	10	14		56770	21	14	15
56870	12	8	15		56871	14	11	12		56870	22	13	13
56970	13	12	14		56971	12	10	12		56970	20	14	12
57070	13	9	17		57071	15	9	12		57070	23	16	16
57170	13	10	13		57171	15	13	13		-942830	22	21	11
57270	13	9	16		57271	15	9	13		57270	20	12	13
57370	13	10	15		57371	15	10	12		57370	21	14	14
57470	16	10	14		57471	15	10	13		57470	23	14	12
57570	13	11	15		57571	13	10	14		57570	20	16	15
57670	11	8	16		57671	16	12	10		57670	20	13	15
57770	11	13	14		57771	17	10	12		57770	20	13	14
57870	14	9	17		57871	16	9	12		57870	18	14	14
57970	15	11	12		57971	14	10	9		57970	18	19	13
58070	12	13	14		58071	14	9	10		58070	21	15	15
58170	11	9	15		58171	17	13	13		58170	17	15	13
58270	15	8	13		58271	15	9	13		58270	20	15	15
58370	13	7	13		58371	11	8	15		58370	18	13	15
58470	13	9	18		58471	13	10	10		58470	20	15	14
58570	14	8	17		58571	15	12	13		58570	18	14	13
58670	12	10	15		58671	12	9	14		58670	17	14	15
58770	12	13	14		58771	13	9	12		58770	16	11	12
58870	15	10	17		58871	13	9	10		58870	16	12	16
58970	14	10	13		58971	14	10	11		58970	16	13	14
59070	14	8	15		59071	11	10	11		59070	18	13	14
59170	14	9	15		59171	11	9	10		59170	21	10	14
59270	11	12	17		59271	13	11	11		59270	14	13	14
59370	11	8	13		59371	13	9	13		59370	19	9	12
59470	13	10	15		59471	11	9	11		59470	20	13	10
59570	13	11	17		59571	13	8	15		59570	18	14	15
59670	13	9	15		59671	12	9	10		59670	18	13	13
59770	13	8	16		59771	14	9	13		59770	18	13	15
59870	12	10	15		59871	12	12	11		59870	16	10	14
59970	12	9	13		59971	12	9	12		59970	17	12	13
60070	12	9	15		60071	14	9	11		60070	20	11	15
60170	13	7	14		60171	12	6	14		60170	22	9	12
60270	9	8	13		60271	12	10	13		60270	17	11	12
60370	12	8	17		60371	14	11	11		60370	19	13	11
60470	12	9	14		60471	12	10	12		60470	24	10	12
60570	11	9	15		60571	13	9	10		60570	19	12	15
60670	13	8	16		60671	12	9	10		60670	19	13	11
60770	12	8	13		60771	11	11	11		60770	21	13	14
60870	12	9	17		60871	11	10	13		60870	18	16	14
60970	9	8	11		60971	13	9	11		60970	16	10	15
61070	13	10	11		61071	11	9	10		61070	20	10	14
61170	15	8	15		61171	11	8	10		61170	17	11	15
61270	11	10	15		61271	11	6	10		61270	20	12	12
61370	11	11	18		61371	14	8	13		61370	19	12	13
61470	14	10	15		61471	12	7	12		61470	18	10	14
61570	8	9	11		61571	13	10	13		61570	16	12	14
61670	11	9	15		61671	12	10	10		61670	21	15	13
61770	12	8	17		61771	13	9	11		61770	20	12	13
61870	10	10	15		61871	12	6	10		61870	17	15	16
61970	10	5	13		61971	13	7	9		61970	14	14	13
62070	11	8	15		62071	11	8	10		62070	20	13	12
62170	12	11	14		62171	9	7	11		62170	16	12	16
62270	12	8	15		62271	12	9	10		62270	13	12	14
62370	11	8	16		62371	14	10	11		62370	16	11	11
62470	12	9	15		62471	12	6	15		62470	16	11	10
62570	13	8	17		62571	11	7	13		62570	15	14	14
62670	13	10	12		62671	12	8	12		62670	18	12	14
62770	15	8	15		62771	12	7	9		62770	12	12	15
62870	12	9	15		62871	12	8	14		62870	15	10	14
62970	12	9	13		62971	9	9	13		62970	19	13	12
63070	11	9	13		63071	11	8	12		63070	19	11	13
63170	13	7	14		63171	12	10	10		63170	17	15	13
63270	11	10	12		63271	12	8	10		63270	17	12	17
63370	12	8	12		63371	13	9	9		63370	20	12	13
63470	11	9	15		63471	11	8	11		63470	17	12	14
63570	12	9	17		63571	12	10	11		63570	16	13	16
63670	11	9	13		63671	12	8	9		63670	16	11	13
63770	9	9	15		63771	13	10	11		63770	16	11	14
63870	9	8	14		63871	11	7	10		63870	19	11	13
63970	11	9	14		63971	12	9	9		63970	15	11	13
64070	10	8	10		64071	12	8	12		64070	16	15	11
64170	9	6	17		64171	13	6	7		64170	13	13	13
64270	12	8	15		64271	14	8	15		64270	16	12	15
64370	12	7	15		64371	11	10	12		64370	14	9	13
64470	10	6	12		64471	11	9	12		64470	16	15	14
64570	11	9	15		64571	12	9	9		64570	21	10	13
64670	10	9	15		64671	13	8	9		64670	16	12	16
64770	14	9	13		64771	11	9	13		64770	19	9	12
64870	9	9	12		64871	12	6	10		64870	20	8	13
64970	10	8	15		64971	11	8	10		64970	22	10	15
65070	8	8	11		65071	10	8	14		65070	15	11	11
65170	7	8	15		-934829	10	9	10		65170	18	11	13
65270	10	8	14		65271	9	7	11		65270	13	10	13
65370	7	7	12		65371	14	11	11		65370	17	10	12
65470	9	10	14		65471	9	8	12		65470	17	9	11
65570	12	8	17		65571	10	9	10		65570	14	12	12
65670	10	8	13		65671	12	7	13		65670	14	12	14
65770	9	9	14		65771	11	8	13		65770	16	11	16
65870	10	8	13		65871	12	10	12		65870	11	9	14
65970	9	7	16		65971	12	7	11		65970	15	10	14
66070	14	12	14		66071	9	9	9		66070	12	10	10
66170	14	8	15		66171	10	9	12		66170	14	10	16
66270	8	6	13		66271	11	7	11		66270	15	13	14
66370	11	11	14		66371	12	6	13		66370	17	11	12
66470	10	9	14		66471	11	8	11		66470	15	13	15
66570	11	7	14		66571	8	6	9		66570	15	12	13
66670	12	8	16		66671	7	6	12		66670	16	12	14
66770	12	8	16		66771	10	9	12		66770	15	8	12
66870	9	8	13		66871	10	8	11		66870	13	10	12
66970	11	11	16		66971	10	11	10		66970	17	9	8
67070	10	9	14		67071	10	8	10		67070	15	11	16
67170	10	8	14		67171	9	8	7		67170	12	10	14
67270	12	9	12		67271	12	6	12		67270	15	9	14
67370	11	9	15		67371	12	6	12		67370	15	8	15
67470	10	8	14		67471	9	9	9		67470	12	11	12
67570	7	8	17		67571	10	10	12		67570	16	10	14
67670	9	7	16		67671	8	9	10		67670	13	10	15
67770	11	9	14		67771	11	9	8		67770	16	10	12
67870	11	11	16		67871	10	8	9		67870	14	10	11
67970	9	10	18		67971	11	8	11		67970	17	14	15
68070	10	9	12		68071	9	10	11		68070	14	10	16
68170	9	7	13		68171	14	5	8		68170	15	10	14
68270	10	10	14		68271	11	10	9		68270	14	10	13
68370	11	9	16		68371	11	6	9		68370	12	7	16
68470	11	8	14		68471	11	9	10		68470	15	9	12
68570	10	8	12		68571	10	9	8		68570	15	10	12
68670	10	6	15		68671	10	7	9		68670	14	10	13
68770	9	8	15		68771	16	10	13		68770	16	10	12
68870	9	8	13		68871	11	7	9		68870	12	10	15
68970	10	9	12		68971	11	9	12		68970	16	9	12
69070	8	10	14		69071	10	6	8		69070	14	9	14
69170	12	8	12		69171	12	7	13		69170	15	12	15
69270	9	5	13		69271	8	7	12		69270	16	11	10
69370	7	9	13		69371	12	6	10		69370	14	8	10
69470	11	7	16		69471	11	8	11		69470	13	9	14
69570	9	10	15		69571	9	6	10		69570	14	9	16
69670	9	7	12		69671	10	7	12		69670	12	11	11
69770	9	7	16		69771	12	7	10		69770	16	9	12
69870	9	8	14		69871	9	10	13		69870	13	8	12
69970	13	7	13		69971	9	7	14		69970	13	9	12
70070	10	7	13		70071	8	8	13		70070	14	11	12
70170	9	7	15		70171	7	7	10		70170	11	6	9
70270	9	8	11		70271	10	7	11		70270	12	9	12
70370	9	8	12		70371	10	7	8		70370	15	7	13
70470	8	8	12		70471	8	9	11		70470	14	10	13
70570	7	8	12		70571	9	5	9		70570	14	11	14
70670	6	7	12		70671	8	7	13		70670	14	8	13
70770	9	5	13		70771	10	7	12		70770	13	12	13
70870	6	7	14		70871	11	9	10		70870	10	8	14
70970	12	8	16		70971	8	9	13		70970	12	10	10
71070	10	7	14		71071	11	8	11		71070	13	9	17
71170	9	5	15		71171	10	9	13		71170	12	10	10
71270	8	7	15		71271	7	6	9		71270	16	11	13
71370	8	9	14		71371	10	7	12		71370	9	9	11
71470	8	7	15		71471	7	7	8		71470	10	9	15
71570	8	6	12		71571	9	9	8		71570	13	11	13
71670	9	7	16		71671	9	8	10		71670	16	9	12
71770	7	7	15		71771	9	7	8		71770	15	8	14
71870	9	8	15		71871	11	5	11		71870	12	11	10
71970	10	7	14		71971	9	6	13		71970	10	9	10
72070	7	7	15		72071	8	7	11		72070	13	9	11
72170	9	7	13		72171	9	9	11		72170	13	9	10
72270	9	7	17		72271	9	8	10		72270	12	9	10
72370	10	8	16		72371	9	10	12		72370	10	8	12
72470	9	6	14		72471	11	8	8		72470	14	8	14
72570	10	7	15		72571	8	5	11		72570	13	10	12
72670	8	10	14		72671	9	5	12		72670	13	10	12
72770	9	8	13		72771	9	6	10		72770	15	10	14
72870	7	6	13		72871	7	7	10		72870	14	10	12
72970	8	8	16		72971	9	5	9		72970	12	9	12
73070	10	7	15		73071	9	7	11		73070	13	7	13
73170	6	9	13		73171	9	6	13		73170	11	9	13
73270	8	7	13		73271	8	6	10		73270	12	8	10
73370	7	5	12		73371	9	6	11		73370	10	10	14
73470	10	9	12		73471	10	8	11		73470	11	10	11
73570	9	7	17		73571	9	7	10		73570	11	11	13
73670	8	8	16		73671	9	6	8		73670	12	11	11
73770	6	6	15		73771	13	9	8		73770	10	11	12
73870	8	8	12		73871	9	7	7		73870	8	9	12
73970	9	9	13		73971	10	5	8		73970	13	10	13
74070	6	8	13		74071	9	9	8		74070	12	6	11
74170	8	6	12		74171	7	5	10		74170	9	11	13
74270	9	5	15		74271	8	7	11		74270	12	9	13
74370	8	8	14		74371	9	9	9		74370	13	8	11
74470	8	9	19		74471	8	8	10		74470	14	10	13
74570	8	8	15		74571	9	5	10		74570	10	10	11
74670	10	6	13		74671	9	5	11		74670	11	9	14
74770	8	5	14		74771	7	5	11		74770	13	8	15
74870	8	6	13		74871	9	10	12		74870	8	9	13
74970	10	7	14		74971	9	12	8		74970	11	8	11
75070	6	7	13		75071	9	7	12		75070	11	10	10
75170	7	6	11		75171	8	7	10		75170	13	10	14
75270	9	6	14		75271	7	8	11		75270	13	8	11
75370	7	7	17		75371	8	6	11		75370	12	10	12
75470	8	7	15		75471	9	7	9		75470	12	8	13
75570	8	8	13		75571	8	8	10		75570	13	10	13
75670	8	5	15		75671	8	7	8		75670	11	7	15
75770	7	6	15		75771	7	6	10		75770	12	9	12
75870	8	8	12		75871	8	7	8		75870	14	10	10
75970	9	6	15		75971	9	5	10		75970	10	7	16
76070	7	7	13		76071	10	6	7		76070	11	10	14
76170	6	7	12		76171	7	7	10		76170	12	8	13
76270	7	7	14		76271	8	7	9		76270	11	10	11
76370	12	6	14		76371	9	5	8		76370	15	9	12
76470	6	6	13		76471	8	7	10		76470	13	9	14
76570	8	6	16		76571	8	7	9		76570	10	8	12
76670	7	8	14		76671	8	9	9		76670	11	10	9
76770	9	6	13		76771	8	7	8		76770	11	7	10
76870	10	7	14		76871	7	6	12		76870	12	8	12
76970	6	7	14		76971	10	7	11		76970	12	6	13
77070	8	6	14		77071	10	7	10		77070	10	8	14
77170	8	6	12		77171	7	7	10		77170	13	10	12
77270	7	7	16		77271	10	5	11		77270	13	9	12
77370	11	7	15		77371	8	6	10		77370	12	7	10
77470	6	6	13		77471	7	5	9		77470	10	9	11
77570	7	6	12		77571	8	8	10		77570	11	8	14
77670	9	6	15		77671	7	5	11		77670	10	6	13
77770	10	6	13		77771	7	6	9		77770	11	8	13
77870	7	5	15		77871	8	7	8		77870	10	6	9
77970	8	7	14		77971	6	4	9		77970	10	8	12
78070	6	6	14		78071	8	7	11		78070	11	7	14
78170	8	6	12		78171	6	8	9		78170	10	9	13
78270	8	8	12		78271	8	7	13		78270	11	8	12
78370	10	5	14		78371	6	6	12		78370	12	5	13
78470	7	8	15		78471	8	6	13		78470	9	8	11
78570	7	5	12		78571	5	8	10		78570	10	9	12
78670	6	7	16		78671	9	8	11		78670	8	7	13
78770	8	5	11		78771	7	6	8		78770	12	9	11
78870	8	5	11		78871	6	7	10		78870	10	7	13
78970	8	5	14		78971	7	9	8		78970	10	8	10
79070	7	7	16		79071	8	7	8		79070	10	8	11
79170	8	5	14		79171	7	7	10		79170	10	8	12
79270	9	7	15		79271	7	6	9		79270	9	6	11
79370	8	5	16		79371	6	6	9		79370	11	8	13
79470	7	7	14		79471	7	4	10		79470	9	7	13
79570	8	7	12		79571	8	6	9		79570	9	9	14
79670	6	5	14		79671	8	5	10		79670	10	7	10
79770	7	7	14		79771	8	6	10		79770	11	9	11
79870	8	5	12		79871	5	6	10		79870	11	7	15
79970	8	7	16		79971	8	8	10		79970	10	8	9
80070	8	7	15		80071	6	6	11		80070	10	8	14
80170	9	7	14		80171	7	6	10		80170	10	8	11
80270	9	6	13		80271	6	6	9		80270	12	8	12
80370	8	6	15		80371	8	5	9		80370	13	8	9
80470	7	6	13		80471	8	7	9		80470	8	6	12
80570	5	5	16		80571	5	3	8		80570	10	7	12
80670	7	6	18		80671	7	6	10		80670	10	9	16
80770	8	8	14		80771	10	7	9		80770	10	9	12
80870	8	6	14		80871	9	5	10		80870	10	7	12
80970	7	5	16		80971	8	8	11		80970	9	7	11
81070	8	6	14		81071	6	5	11		81070	11	8	11
81170	9	8	13		81171	8	7	7		81170	10	8	14
81270	6	6	14		81271	6	6	7		81270	11	8	11
81370	8	8	14		81371	6	6	9		81370	11	6	10
81470	7	7	15		81471	7	5	9		81470	11	7	11
81570	7	7	15		81571	9	5	10		81570	10	11	12
81670	6	5	11		81671	7	6	9		81670	7	7	15
81770	8	7	13		81771	9	4	8		81770	10	5	12
81870	6	5	12		81871	8	9	9		81870	12	8	11
81970	4	5	14		81971	8	6	10		81970	8	6	15
82070	6	5	16		82071	8	7	10		82070	12	6	12
82170	7	8	14		82171	8	5	10		82170	8	6	14
82270	7	6	14		82271	7	7	10		82270	7	6	13
82370	6	6	12		82371	6	6	10		82370	6	6	14
82470	7	6	15		82471	7	6	8		82470	10	7	12
82570	7	7	15		82571	6	6	10		82570	12	5	10
82670	7	7	11		82671	7	5	11		82670	11	8	12
82770	6	7	16		82771	10	5	10		82770	10	8	11
82870	6	4	13		82871	6	5	8		82870	11	7	10
82970	9	6	14		82971	7	7	6		82970	9	6	11
83070	8	6	14		83071	9	5	10		83070	10	7	11
83170	8	6	14		83171	7	5	7		83170	9	7	13
83270	9	7	10		83271	7	6	8		83270	12	10	12
83370	7	5	14		83371	8	6	8		83370	7	6	11
83470	5	8	16		83471	7	4	11		83470	9	7	12
83570	7	7	13		83571	7	4	10		83570	10	7	11
83670	6	8	16		83671	6	6	12		83670	11	6	9
83770	7	6	12		83771	7	7	12		83770	8	8	11
83870	6	6	13		83871	8	4	10		83870	8	8	12
83970	9	4	15		83971	11	5	10		83970	10	6	12
84070	7	6	16		84071	6	5	8		84070	11	7	10
84170	7	6	12		84171	7	5	10		84170	8	7	11
84270	7	6	14		84271	6	7	8		84270	7	8	14
84370	8	7	12		84371	7	4	9		84370	9	7	10
84470	9	7	13		84471	8	5	11		84470	9	6	14
84570	6	5	17		84571	7	6	10		84570	8	7	11
84670	7	5	13		84671	7	5	10		84670	8	7	14
84770	6	4	13		84771	6	6	10		84770	7	8	13
84870	7	6	15		84871	7	4	10		84870	10	8	10
84970	6	7	14		84971	7	5	9		84970	10	6	11
85070	7	5	11		85071	7	7	8		85070	9	8	11
85170	5	5	17		85171	7	5	10		85170	10	5	10
85270	7	6	15		85271	7	5	8		85270	9	6	10
85370	7	5	13		85371	8	7	11		85370	12	7	12
85470	9	8	13		85471	6	5	12		85470	9	6	14
85570	7	6	14		85571	6	7	9		85570	8	8	15
85670	7	4	15		85671	7	6	10		85670	8	7	10
85770	6	5	15		85771	6	5	10		85770	8	8	11
85870	5	7	10		85871	7	7	8		85870	10	8	12
85970	8	6	13		85971	7	6	9		85970	8	8	11
86070	7	7	11		86071	5	4	7		86070	10	7	13
86170	8	6	14		86171	5	3	7		86170	8	7	11
86270	6	7	14		86271	6	7	11		86270	9	8	14
86370	7	7	14		86371	7	6	8		86370	11	8	17
86470	6	8	13		86471	6	6	8		86470	7	8	12
86570	7	6	13		86571	5	3	9		86570	10	7	14
86670	6	7	12		86671	7	6	11		86670	8	6	12
86770	7	4	13		86771	8	3	7		86770	11	6	10
86870	8	6	15		86871	4	5	9		86870	12	7	11
86970	4	4	19		86971	5	5	10		86970	8	7	9
87070	7	4	12		87071	6	5	9		87070	8	10	12
87170	6	4	13		87171	6	4	6		87170	6	8	13
87270	11	5	13		87271	8	4	10		87270	11	8	12
87370	5	5	12		87371	7	4	10		87370	8	8	13
87470	4	4	12		87471	5	5	11		87470	7	8	13
87570	5	4	12		87571	6	5	9		87570	12	7	13
87670	5	4	14		87671	6	6	8		87670	8	8	13
87770	5	4	14		87771	7	6	8		87770	10	7	10
87870	5	6	13		87871	6	4	10		87870	9	8	10
87970	9	5	13		87971	7	5	7		87970	8	9	13
88070	6	7	12		88071	7	4	11		88070	9	8	13
88170	4	7	14		88171	7	5	12		88170	6	8	12
88270	6	4	16		88271	7	7	9		88270	7	7	13
88370	5	6	15		88371	7	5	8		88370	5	6	11
88470	9	4	17		88471	7	7	9		88470	9	7	12
88570	6	6	13		88571	6	3	10		88570	10	7	10
88670	4	6	15		88671	6	4	10		88670	9	7	12
88770	6	7	13		88771	9	5	10		88770	8	7	13
88870	6	6	16		88871	7	6	8		88870	8	8	13
88970	7	8	15		88971	8	4	7		88970	6	5	12
89070	5	5	13		89071	8	4	12		89070	10	5	10
89170	5	7	12		89171	7	6	12		89170	9	6	9
89270	8	4	14		89271	8	7	10		89270	8	7	12
89370	7	7	11		89371	5	5	13		89370	9	7	12
89470	6	6	12		89471	6	5	8		89470	7	6	11
89570	6	5	16		89571	7	5	7		89570	9	5	13
89670	7	4	14		89671	5	3	11		89670	9	6	11
89770	6	6	15		89771	7	5	9		89770	7	8	10
89870	5	5	11		89871	6	5	9		89870	8	7	10
89970	5	4	13		89971	8	5	11		89970	9	6	14
90070	6	4	14		90071	6	4	10		90070	7	5	13
90170	7	6	15		90171	6	5	8		90170	7	7	12
90270	6	7	14		90271	6	4	10		90270	9	7	11
90370	5	5	14		90371	5	7	10		90370	9	6	11
90470	5	5	14		90471	6	4	12		90470	6	5	12
90570	3	3	15		90571	7	5	8		90570	6	7	13
90670	4	6	13		90671	5	6	7		90670	8	9	11
90770	6	5	17		90771	6	6	10		90770	8	7	11
90870	5	5	15		90871	7	6	6		90870	9	5	13
90970	4	6	14		90971	5	3	9		90970	8	6	13
91070	8	3	14		91071	6	5	9		91070	7	6	13
91170	5	4	12		91171	6	5	11		91170	10	5	10
91270	5	4	13		91271	6	4	8		91270	7	5	11
91370	6	4	14		91371	4	5	6		91370	8	8	11
91470	5	6	13		91471	8	5	7		91470	9	6	12
91570	4	4	11		91571	7	6	10		91570	8	6	9
91670	5	6	13		91671	5	5	10		91670	9	9	12
91770	7	6	14		91771	7	5	9		91770	8	5	12
91870	6	6	12		91871	6	3	12		91870	8	6	12
91970	8	5	12		91971	5	5	7		91970	6	7	9
92070	6	6	15		92071	5	8	8		92070	8	6	12
92170	3	5	13		92171	5	5	8		92170	9	8	13
92270	7	6	11		92271	5	5	8		92270	9	6	12
92370	4	5	14		92371	5	5	13		92370	9	8	13
92470	5	5	16		92471	4	7	8		92470	9	8	12
92570	5	7	11		92571	7	5	9		92570	6	7	14
92670	7	5	15		92671	7	5	8		92670	8	7	12
92770	5	4	14		92771	5	4	7		92770	9	7	10
92870	5	4	13		92871	5	4	8		92870	8	6	12
92970	5	8	15		92971	7	5	11		92970	9	5	12
93070	6	4	13		93071	6	4	8		93070	8	8	10
93170	4	6	12		93171	6	6	9		93170	6	8	12
93270	5	6	16		93271	7	5	10		93270	7	6	13
93370	5	6	13		93371	5	3	7		93370	7	7	16
93470	5	5	13		93471	6	5	7		93470	11	4	12
93570	4	5	15		93571	6	4	8		93570	8	7	11
93670	5	4	14		93671	5	4	10		93670	10	6	15
93770	7	5	12		93771	6	4	10		93770	8	6	12
93870	7	6	15		93871	6	5	12		93870	7	7	9
93970	7	6	11		93971	5	5	9		93970	6	6	13
94070	6	5	14		94071	7	5	11		94070	7	6	12
94170	10	4	13		94171	5	6	9		94170	8	8	11
94270	6	6	16		94271	5	7	7		94270	8	6	13
94370	6	4	13		94371	5	6	8		94370	7	6	13
94470	5	8	12		94471	7	4	12		94470	8	7	14
94570	6	5	14		94571	8	6	8		94570	9	6	14
94670	6	5	13		94671	6	5	10		94670	7	7	14
94770	6	5	14		94771	5	4	8		94770	7	4	12
94870	5	6	11		94871	7	5	6		94870	10	6	14
94970	6	6	12		94971	4	6	7		94970	6	8	12
95070	6	3	13		95071	5	4	8		95070	5	7	12
95170	5	5	12		95171	7	5	9		95170	6	4	13
95270	6	6	11		95271	7	5	8		95270	7	6	13
95370	4	5	17		95371	5	6	8		95370	8	6	13
95470	5	6	10		95471	5	5	9		95470	9	4	13
95570	5	6	15		95571	4	4	8		95570	7	7	11
95670	4	6	14		95671	7	4	8		95670	7	5	12
95770	6	4	14		95771	5	3	8		95770	6	7	11
95870	5	4	15		95871	5	6	10		95870	8	5	12
95970	6	6	13		95971	7	5	9		95970	8	6	10
96070	5	6	17		96071	5	3	10		96070	7	8	10
96170	5	5	14		96171	4	6	10		96170	8	7	11
96270	4	5	14		96271	6	5	7		96270	5	7	11
96370	4	5	12		96371	4	4	10		96370	5	6	11
96470	5	6	12		96471	6	5	8		96470	6	5	13
96570	4	6	14		96571	6	4	9		96570	8	5	15
96670	5	5	16		96671	5	5	7		96670	5	6	12
96770	6	5	13		96771	5	5	10		96770	7	6	10
96870	7	7	13		96871	7	3	6		96870	6	5	9
96970	7	5	14		96971	5	4	9		96970	9	5	13
97070	4	7	15		97071	4	7	8		97070	9	6	12
97170	4	7	12		97171	6	5	8		97170	7	8	12
97270	7	5	12		97271	5	4	10		97270	6	8	11
97370	5	5	11		97371	6	4	7		97370	8	6	11
97470	4	7	15		97471	6	5	8		97470	7	6	12
97570	5	5	12		97571	4	6	10		97570	6	7	12
97670	5	5	15		97671	6	7	10		97670	7	6	12
97770	5	4	11		97771	6	4	6		97770	8	4	14
97870	4	4	14		97871	4	7	8		97870	7	8	11
97970	5	5	14		97971	7	5	9		97970	5	5	11
98070	4	4	16		98071	5	3	9		98070	6	7	15
98170	4	6	15		98171	6	5	8		98170	7	6	11
98270	6	4	12		98271	4	6	7		98270	6	6	11
98370	4	5	11		98371	5	5	9		98370	7	8	10
98470	5	7	14		98471	5	3	9		98470	5	8	10
98570	5	4	12		98571	4	5	9		98570	8	5	11
98670	5	6	12		98671	4	5	12		98670	7	8	12
98770	4	5	13		98771	5	5	8		98770	6	6	10
98870	4	5	12		98871	5	6	10		98870	7	7	11
98970	5	5	13		98971	5	2	8		98970	6	6	13
99070	5	5	14		99071	5	4	9		99070	8	6	10
99170	5	6	13		99171	7	4	8		99170	5	6	11
99270	6	7	12		99271	5	6	10		99270	6	5	14
99370	5	4	13		99371	7	4	8		99370	7	6	13
99470	3	4	16		99471	5	5	6		99470	7	6	13
99570	6	4	12		99571	5	6	9		99570	8	6	10
99670	5	5	12		99671	6	5	6		99670	6	6	14
99770	5	7	13		99771	6	6	8		99770	8	7	14
99870	7	5	15		99871	5	6	10		99870	9	6	12
99970	5	6	14		99971	5	4	9		99970	6	6	13
100070	5	4	10		100071	4	4	8		100070	6	6	13
100170	4	6	14		100171	6	4	8		100170	10	5	11
100270	8	6	12		100271	6	4	7		100270	6	7	11
100370	3	5	10		100371	5	4	9		100370	7	5	12
100470	7	6	15		100471	5	4	12		100470	7	6	11
100570	4	5	13		100571	6	6	6		100570	7	9	10
100670	5	6	12		100671	5	4	8		100670	5	5	13
100770	4	5	14		100771	6	4	9		100770	8	6	12
100870	5	7	12		100871	4	4	8		100870	7	6	12
100970	4	7	14		100971	5	5	9		100970	9	7	11
101070	4	4	16		101071	4	6	11		101070	9	5	13
101170	4	5	14		101171	4	5	9		101170	5	7	14
101270	6	5	14		101271	5	5	9		101270	6	5	10
101370	6	5	12		101371	5	3	11		101370	8	7	14
101470	3	5	16		101471	3	6	9		101470	7	7	14
101570	4	3	11		101571	4	3	8		101570	6	6	11
101670	6	6	13		101671	6	5	5		101670	7	7	11
101770	5	5	17		101771	5	5	9		101770	4	6	14
101870	5	5	14		101871	5	4	9		101870	6	6	12
101970	4	6	14		101971	4	5	12		101970	7	5	12
102070	4	4	14		102071	6	5	11		102070	7	5	12
102170	4	4	14		102171	6	5	9		102170	7	7	14
102270	4	5	11		102271	5	4	8		102270	8	7	13
102370	5	5	13		102371	7	4	8		102370	7	6	13
102470	5	3	15		102471	4	6	8		102470	6	5	13
102570	4	4	12		102571	4	5	10		102570	5	6	11
102670	5	5	14		102671	6	4	8		102670	8	8	11
102770	5	7	16		102771	6	4	9		102770	5	7	12
102870	5	4	14		102871	4	3	8		102870	8	4	11
102970	3	4	11		102971	4	6	9		102970	5	7	12
103070	6	7	12		103071	3	4	8		103070	5	5	12
103170	5	6	14		103171	5	5	11		103170	6	6	12
103270	5	6	14		103271	5	5	9		103270	6	5	12
103370	5	6	13		103371	5	4	6		103370	5	7	11
103470	7	5	15		103471	4	4	10		103470	7	6	12
103570	4	5	15		103571	4	6	9		103570	5	5	8
103670	4	6	13		103671	6	4	8		103670	6	6	13
103770	4	5	11		103771	4	7	9		103770	5	7	12
103870	6	6	13		103871	6	5	10		103870	6	5	8
103970	4	6	14		103971	5	3	9		103970	5	5	15
104070	4	5	15		104071	6	4	7		104070	7	4	9
104170	5	6	13		104171	7	4	10		104170	7	6	12
104270	3	4	13		104271	4	6	7		104270	5	5	11
104370	5	5	12		104371	3	6	8		104370	7	5	13
104470	4	6	17		104471	4	3	11		104470	7	5	9
104570	5	7	14		104571	5	4	8		104570	7	5	11
104670	5	5	14		104671	6	5	7		104670	6	6	10
104770	4	5	13		104771	4	4	8		104770	7	8	10
104870	5	4	14		104871	4	3	9		104870	7	8	10
104970	4	6	16		104971	6	5	9		104970	4	6	9
105070	5	5	13		105071	3	6	11		105070	5	8	14
105170	5	5	14		105171	4	4	9		105170	7	6	11
105270	7	5	14		105271	5	5	9		105270	5	7	11
105370	4	5	15		105371	4	4	8		105370	7	6	11
105470	5	4	14		105471	7	6	7		105470	6	7	11
105570	5	6	12		105571	5	6	9		105570	5	8	13
105670	5	6	13		105671	6	3	9		105670	5	4	12
105770	4	6	14		105771	5	4	10		105770	7	5	11
105870	5	4	12		105871	4	6	9		105870	7	6	10
105970	5	6	12		105971	3	3	11		105970	7	6	10
106070	6	6	13		106071	6	6	7		106070	6	5	12
106170	5	6	12		106171	4	4	9		106170	7	5	11
106270	4	5	16		106271	5	6	7		106270	4	6	10
106370	3	4	14		106371	4	4	9		106370	6	5	11
106470	5	5	14		106471	5	5	8		106470	4	7	11
106570	5	4	13		106571	5	3	11		106570	5	5	12
106670	3	5	14		106671	5	4	8		106670	6	4	14
106770	5	5	14		106771	4	5	8		106770	6	5	10
106870	4	7	13		106871	5	4	11		106870	7	5	12
106970	5	4	12		106971	4	6	8		106970	5	5	11
107070	6	6	14		107071	6	4	9		107070	4	6	13
107170	5	4	16		107171	4	4	8		107170	5	7	11
107270	7	6	15		107271	4	3	8		107270	7	8	12
107370	5	6	14		107371	4	5	6		107370	5	9	12
107470	5	5	13		107471	4	5	7		107470	6	5	11
107570	5	5	12		107571	4	5	7		107570	6	6	11
107670	5	4	12		107671	5	6	8		107670	6	6	11
107770	3	5	14		107771	5	4	9		107770	4	5	11
107870	4	5	14		107871	4	4	9		107870	5	5	12
107970	3	7	12		107971	3	4	8		107970	7	6	10
108070	6	4	16		108071	5	6	8		108070	6	3	10
108170	5	3	10		108171	5	5	7		108170	6	6	9
108270	6	6	13		108271	6	6	8		108270	6	6	12
108370	4	6	13		108371	6	4	10		108370	6	5	10
108470	5	5	13		108471	5	4	10		108470	4	5	11
108570	5	5	12		108571	3	3	7		108570	6	6	11
108670	3	4	15		108671	6	4	9		108670	8	6	10
108770	3	5	12		108771	5	4	9		108770	4	5	11
108870	4	6	11		108871	3	5	10		108870	7	8	11
108970	4	4	13		108971	5	4	8		108970	6	7	12
109070	5	5	15		109071	4	4	9		109070	6	5	12
109170	4	4	13		109171	6	5	10		109170	7	5	11
109270	5	5	10		109271	4	2	10		109270	5	5	12
109370	5	6	11		109371	4	3	9		109370	6	5	10
109470	2	5	15		109471	4	4	13		109470	5	6	12
109570	4	4	13		109571	5	4	7		109570	7	6	11
109670	3	6	12		109671	4	4	10		109670	5	5	12
109770	6	6	12		109771	5	3	6		109770	7	7	12
109870	4	5	14		109871	7	6	10		109870	5	5	9
109970	5	5	13		109971	5	5	10		109970	6	5	11
110070	5	5	13		110071	5	4	6		110070	4	7	10
110170	6	5	17		110171	4	7	8		110170	5	6	10
110270	3	5	16		110271	4	5	7		110270	7	3	10
110370	4	3	10		110371	3	3	10		110370	4	7	12
110470	3	7	13		110471	4	3	8		110470	6	5	14
110570	4	4	14		110571	4	4	8		110570	8	5	12
110670	3	4	12		110671	4	4	7		110670	5	6	12
110770	3	5	13		110771	6	5	8		110770	6	7	12
110870	5	6	13		110871	4	5	10		110870	5	7	12
110970	4	5	13		110971	4	4	8		110970	4	5	11
111070	5	5	11		111071	4	4	8		111070	5	5	12
111170	4	4	10		111171	4	4	7		111170	6	6	14
111270	5	5	12		111271	5	3	9		111270	6	5	13
111370	5	4	14		111371	5	4	7		111370	4	4	8
111470	4	4	14		111471	3	5	9		111470	5	5	13
111570	4	6	14		111571	3	5	7		111570	3	5	11
111670	4	4	14		111671	4	4	8		111670	5	6	13
111770	4	6	11		111771	6	4	11		111770	4	6	12
111870	4	5	12		111871	6	3	11		111870	5	5	12
111970	5	4	13		111971	4	3	8		111970	5	5	13
112070	5	5	13		112071	6	5	8		112070	6	6	11
112170	4	5	14		112171	3	4	6		112170	5	5	10
112270	4	6	11		112271	6	4	10		112270	5	4	13
112370	6	6	12		112371	5	5	8		112370	5	5	11
112470	4	7	12		112471	5	4	8		112470	5	6	12
112570	4	5	12		112571	5	4	9		112570	3	6	12
112670	4	5	13		112671	3	3	8		112670	6	7	12
112770	3	7	16		112771	3	3	8		112770	5	8	12
112870	6	7	10		112871	4	4	8		112870	5	7	11
112970	6	4	12		112971	7	3	9		112970	5	5	10
113070	4	5	12		113071	4	3	8		113070	6	8	12
113170	4	5	13		113171	5	4	10		113170	4	5	15
113270	4	7	14		113271	4	5	9		113270	6	5	12
113370	4	5	11		113371	5	4	8		113370	4	7	14
113470	5	5	15		113471	5	4	7		113470	6	6	13
113570	4	6	12		113571	4	3	9		113570	5	6	11
113670	5	4	11		113671	4	4	8		113670	6	5	10
113770	5	5	13		113771	4	5	8		113770	6	6	12
113870	4	7	14		113871	4	5	11		113870	5	4	12
113970	4	6	15		113971	2	4	8		113970	5	7	12
114070	5	5	12		114071	5	3	8		114070	5	6	13
114170	4	5	13		114171	5	5	8		114170	6	4	13
114270	4	4	15		114271	5	5	9		114270	5	4	11
114370	4	6	18		114371	4	4	8		114370	5	3	13
114470	5	5	16		114471	4	6	7		114470	6	5	11
114570	4	6	13		114571	5	5	9		114570	8	5	9
114670	3	5	14		114671	4	5	9		114670	5	6	10
114770	4	4	13		114771	6	4	9		114770	4	6	11
114870	4	4	14		114871	4	6	7		114870	5	5	12
114970	5	4	11		114971	4	3	8		114970	5	5	12
115070	5	6	13		115071	4	5	8		115070	6	6	13
115170	5	6	14		115171	3	3	10		115170	5	5	8
115270	4	3	13		115271	4	4	8		115270	6	6	11
115370	4	4	16		115371	4	3	8		115370	6	4	8
115470	6	6	13		115471	3	4	6		115470	4	5	11
115570	5	5	13		115571	4	4	7		115570	5	5	11
115670	4	4	16		115671	6	5	9		115670	5	6	11
115770	4	4	15		115771	5	5	9		115770	4	5	10
115870	5	5	13		115871	4	4	8		115870	3	5	9
115970	4	5	12		115971	3	4	7		115970	6	6	9
116070	3	5	12		116071	5	3	7		116070	6	7	11
116170	4	5	14		116171	5	4	9		116170	4	6	11
116270	4	4	13		116271	6	3	9		116270	6	5	13
116370	3	6	10		116371	4	6	8		116370	5	6	13
116470	4	4	10		116471	4	3	7		116470	6	4	10
116570	5	5	13		116571	5	4	7		116570	4	4	13
116670	4	6	13		116671	4	3	7		116670	6	5	12
116770	3	7	11		116771	4	4	8		116770	5	6	12
116870	3	3	13		116871	4	4	9		116870	4	5	11
116970	4	5	13		116971	4	5	8		116970	6	5	10
117070	5	4	14		117071	7	4	9		117070	5	4	11
117170	5	7	11		117171	4	4	7		117170	5	5	10
117270	5	4	15		117271	4	5	7		117270	4	5	14
117370	4	5	12		117371	5	3	6		117370	5	5	11
117470	4	4	12		117471	3	5	6		117470	5	5	11
117570	5	6	13		117571	4	3	7		117570	5	4	9
117670	4	5	14		117671	5	3	8		117670	4	5	9
117770	3	6	14		117771	4	3	9		117770	5	6	15
117870	3	5	12		117871	2	5	8		117870	6	7	10
117970	4	6	13		117971	4	5	7		117970	5	5	12
118070	5	5	12		118071	5	3	8		118070	3	5	10
118170	5	4	15		118171	3	3	7		118170	5	5	9
118270	3	5	13		118271	4	2	9		118270	3	5	13
118370	4	4	13		118371	4	4	7		118370	6	6	9
118470	3	7	16		118471	3	4	7		118470	5	7	8
118570	6	4	12		118571	5	4	10		118570	6	5	9
118670	3	5	13		118671	4	4	9		118670	5	6	12
118770	5	6	10		118771	4	3	7		118770	5	6	10
118870	4	4	15		118871	3	5	6		118870	4	5	12
118970	5	4	14		118971	3	5	8		118970	4	4	11
119070	5	4	16		119071	4	5	7		119070	5	5	11
119170	4	5	10		119171	4	2	6		119170	6	5	11
119270	5	5	12		119271	4	3	8		119270	6	6	12
119370	4	5	11		119371	4	3	8		119370	4	4	12
119470	5	5	14		119471	5	5	7		119470	6	6	12
119570	4	4	10		119571	3	3	9		119570	4	6	12
119670	3	5	13		119671	3	6	9		119670	4	6	10
119770	4	4	13		119771	4	5	8		119770	4	6	11
119870	4	5	14		119871	3	5	11		119870	5	5	12
119970	4	5	12		119971	5	4	7		119970	4	5	10
120070	2	6	12		120071	4	4	9		120070	4	7	12
120170	4	5	10		120171	3	5	7		120170	4	6	12
120270	3	4	15		120271	6	4	9		120270	5	5	12
120370	6	7	14		120371	3	5	10		120370	4	6	10
120470	4	3	12		120471	3	4	9		120470	4	5	11
120570	4	5	12		120571	3	4	9		120570	3	5	11
120670	5	4	14		120671	4	4	6		120670	4	5	9
120770	3	5	12		120771	5	4	9		120770	5	5	13
120870	4	7	10		120871	5	4	7		120870	6	4	10
120970	3	4	13		120971	4	3	8		120970	4	6	15
121070	4	8	13		121071	5	4	8		121070	5	4	10
121170	3	4	13		121171	3	3	7		121170	4	5	13
121270	2	3	12		121271	4	3	8		121270	4	5	11
121370	3	5	13		121371	5	4	6		121370	3	5	10
121470	3	4	10		121471	3	4	9		121470	3	4	12
121570	5	5	13		121571	5	4	8		121570	5	7	12
121670	5	3	12		121671	3	3	9		121670	4	7	8
121770	3	4	12		121771	3	4	8		121770	6	6	12
121870	3	6	14		121871	4	4	7		121870	4	6	13
121970	4	5	12		121971	2	4	7		121970	3	5	14
122070	3	6	12		122071	2	5	10		122070	4	6	12
122170	3	5	16		122171	3	3	7		122170	4	5	10
122270	5	4	13		122271	6	3	8		122270	3	6	13
122370	5	5	11		122371	3	4	8		122370	4	5	12
122470	4	5	14		122471	5	4	9		122470	3	4	11
122570	3	5	13		122571	4	2	10		122570	4	5	11
122670	4	4	12		122671	3	5	9		122670	5	6	14
122770	3	5	12		122771	3	3	9		122770	4	5	12
122870	5	4	12		122871	3	3	9		122870	5	4	10
122970	4	7	16		122971	2	5	7		122970	4	4	12
123070	5	4	14		123071	5	5	9		123070	5	4	9
123170	4	3	12		123171	4	3	9		123170	5	6	12
123270	3	5	13		123271	5	4	7		123270	3	5	9
123370	2	4	17		123371	4	5	10		123370	5	7	12
123470	4	5	13		123471	3	3	7		123470	4	6	8
123570	4	5	13		123571	5	5	8		123570	6	5	14
123670	3	4	14		123671	4	4	11		123670	4	5	13
123770	3	5	13		123771	3	5	7		123770	5	5	10
123870	2	4	15		123871	5	3	10		123870	4	6	10
123970	3	5	12		123971	4	4	7		123970	4	6	14
124070	5	4	12		124071	4	3	7		124070	5	5	10
124170	4	5	18		124171	3	4	8		124170	3	4	10
124270	4	5	13		124271	3	5	7		124270	6	4	9
124370	3	3	12		124371	5	3	8		124370	6	3	14
124470	4	7	11		124471	3	3	11		124470	6	7	10
124570	4	5	16		124571	3	3	11		124570	5	6	10
124670	4	6	14		124671	3	3	8		124670	4	5	10
124770	3	4	13		124771	4	3	6		124770	4	4	10
124870	2	6	19		124871	2	4	11		124870	6	5	12
124970	4	6	16		124971	3	6	8		124970	5	3	12
125070	4	5	13		125071	4	4	10		125070	5	6	11
125170	3	5	14		125171	5	2	9		125170	4	4	15
125270	4	7	15		125271	4	4	8		125270	6	4	10
125370	5	5	13		125371	4	5	8		125370	5	7	12
125470	2	6	14		125471	4	5	7		125470	4	5	12
125570	5	7	12		125571	5	3	9		125570	4	7	10
125670	4	5	14		125671	3	3	8		125670	4	6	13
125770	5	5	13		125771	5	4	6		125770	6	6	11
125870	3	7	13		125871	4	5	8		125870	5	7	11
125970	4	5	13		125971	3	5	8		125970	6	3	9
126070	4	5	15		126071	3	4	9		126070	5	7	10
126170	2	6	12		126171	4	4	8		126170	5	4	12
126270	3	4	12		126271	4	4	10		126270	5	6	13
126370	4	5	14		126371	3	3	8		126370	4	5	12
126470	4	6	12		126471	3	3	8		126470	4	4	10
126570	6	4	11		126571	4	3	8		126570	4	7	15
126670	3	5	13		126671	3	3	8		126670	3	4	10
126770	4	4	15		126771	3	4	6		126770	5	5	10
126870	3	4	14		126871	3	5	5		126870	4	6	13
126970	3	5	13		126971	3	6	9		126970	6	7	9
127070	5	5	15		127071	3	5	8		127070	5	6	10
127170	4	6	13		127171	3	4	9		127170	4	6	11
127270	3	6	12		127271	3	3	8		127270	6	7	10
127370	4	5	14		127371	5	3	11		127370	3	5	15
127470	4	3	15		127471	5	4	10		127470	4	4	11
127570	4	6	14		127571	4	3	7		127570	5	5	10
127670	3	4	10		127671	4	3	8		127670	4	6	11
127770	3	4	14		127771	3	3	7		127770	2	6	9
127870	3	3	12		127871	3	2	7		127870	4	8	9
127970	2	5	14		127971	3	3	7		127970	4	5	9
128070	5	5	15		128071	3	4	8		128070	3	4	11
128170	4	3	15		128171	2	4	8		128170	6	4	11
128270	3	4	14		128271	4	4	8		128270	3	6	10
128370	3	4	14		128371	4	5	9		128370	6	7	10
128470	2	5	10		128471	4	6	9		128470	5	6	11
128570	2	5	12		128571	4	3	8		128570	5	7	9
128670	2	5	13		128671	3	2	5		128670	5	5	12
128770	3	4	14		128771	2	4	8		128770	4	6	11
128870	3	3	14		128871	4	5	8		128870	4	5	13
128970	3	4	13		128971	4	3	7		128970	4	8	9
129070	3	6	12		129071	2	3	9		129070	5	6	14
129170	5	6	16		129171	4	3	7		129170	5	4	11
129270	3	4	14		129271	5	3	8		129270	3	5	12
129370	3	5	10		129371	4	4	7		129370	4	6	12
129470	2	5	13		129471	4	3	8		129470	3	4	9
129570	4	5	12		129571	2	4	7		129570	5	5	11
129670	3	7	8		129671	3	3	9		129670	3	4	9
129770	3	4	12		129771	5	4	11		129770	4	5	8
129870	4	2	14		129871	4	4	8		129870	5	6	11
129970	5	5	10		129971	5	4	8		129970	5	5	13
130070	4	4	9		130071	2	3	8		130070	3	5	13
130170	2	3	13		130171	2	4	9		130170	4	5	11
130270	5	5	12		130271	6	2	6		130270	3	4	11
130370	2	4	13		130371	3	4	7		130370	2	4	13
130470	3	4	12		130471	3	4	9		130470	5	6	10
130570	4	5	12		130571	4	4	7		130570	5	3	11
130670	4	6	14		130671	4	5	8		130670	5	5	10
130770	3	4	12		130771	3	2	8		130770	5	6	14
130870	2	3	14		130871	2	2	9		130870	3	4	9
130970	4	4	10		130971	2	4	7		130970	4	4	10
131070	3	4	13		131071	2	5	7		131070	4	5	12
131170	4	3	14		131171	3	3	8		131170	4	4	11
131270	2	4	11		131271	3	4	7		131270	3	5	10
131370	3	6	11		131371	3	4	9		131370	4	5	14
131470	4	6	12		131471	4	4	10		131470	3	4	11
131570	5	6	13		131571	2	3	9		131570	4	5	10
131670	3	4	14		131671	4	4	8		131670	4	6	7
131770	4	5	13		131771	4	4	9		131770	6	6	8
131870	4	5	11		131871	3	2	9		131870	3	6	13
131970	3	4	13		131971	4	4	7		131970	4	5	11
132070	3	6	13		132071	3	4	9		132070	3	4	12
132170	3	4	15		132171	4	3	10		132170	4	7	10
132270	2	5	11		132271	3	3	8		132270	4	4	9
132370	2	3	13		132371	4	4	6		132370	5	5	9
132470	3	4	11		132471	3	3	8		132470	3	7	11
132570	2	4	14		132571	4	4	9		132570	3	4	11
132670	2	4	12		132671	4	3	7		132670	5	7	11
132770	2	3	12		132771	4	5	7		132770	2	4	10
132870	4	5	15		132871	3	4	8		132870	5	6	10
132970	2	5	12		132971	3	4	8		132970	4	8	9
133070	4	5	11		133071	2	3	8		133070	3	4	9
133170	1	4	12		133171	2	4	8		133170	3	4	13
133270	2	5	10		133271	4	4	8		133270	4	5	9
133370	4	5	13		133371	3	4	8		133370	5	5	13
133470	3	4	15		133471	4	4	10		133470	4	4	10
133570	3	4	11		133571	2	4	10		133570	4	8	13
133670	3	4	12		133671	3	4	6		133670	4	4	9
133770	4	5	10		133771	3	5	9		133770	3	5	13
133870	3	5	12		133871	4	4	10		133870	2	6	10
133970	3	2	11		133971	2	4	9		133970	4	6	12
134070	3	4	13		134071	4	2	8		134070	4	4	10
134170	4	4	15		134171	4	3	9		134170	4	4	10
134270	2	4	11		134271	6	4	8		134270	3	6	10
134370	3	4	15		134371	3	4	10		134370	3	4	14
134470	4	5	14		134471	4	4	8		134470	3	5	11
134570	2	4	14		134571	3	4	9		134570	4	7	11
134670	3	4	15		134671	3	3	8		134670	2	6	11
134770	3	4	12		134771	4	3	9		134770	3	4	11
134870	3	4	12		134871	3	4	7		134870	4	4	11
134970	4	4	15		134971	2	4	9		134970	3	4	11
135070	3	4	13		135071	3	4	8		135070	4	5	12
135170	4	4	13		135171	4	5	6		135170	3	3	9
135270	3	5	18		135271	3	4	8		135270	4	4	10
135370	3	3	15		135371	5	4	8		135370	4	6	13
135470	4	5	13		135471	3	4	7		135470	3	5	12
135570	3	6	13		135571	4	4	7		135570	4	7	9
135670	4	5	10		135671	3	4	10		135670	3	4	10
135770	3	6	11		135771	4	3	6		135770	4	5	9
135870	3	6	12		135871	4	4	8		135870	3	5	10
135970	4	5	12		135971	4	4	9		135970	5	5	9
136070	4	4	11		136071	2	3	6		136070	3	6	11
136170	3	4	15		136171	4	3	7		136170	4	5	11
136270	3	4	12		136271	3	4	9		136270	5	5	9
136370	4	4	15		136371	4	2	10		136370	4	7	12
136470	3	4	13		136471	3	4	9		136470	3	4	11
136570	4	6	15		136571	2	2	10		136570	4	4	9
136670	5	6	16		136671	3	3	9		136670	4	4	10
136770	3	4	15		136771	3	4	7		136770	4	5	9
136870	3	4	12		136871	4	2	10		136870	4	5	8
136970	2	4	11		136971	3	4	10		136970	4	3	14
137070	4	5	12		137071	2	4	9		137070	3	7	7
137170	2	5	13		137171	2	2	6		137170	4	5	12
137270	4	4	14		137271	2	3	6		137270	4	4	13
137370	4	6	16		137371	4	4	9		137370	4	6	9
137470	3	3	15		137471	2	4	9		137470	4	6	11
137570	3	5	11		137571	3	2	10		137570	3	4	11
137670	3	5	11		137671	3	4	8		137670	4	5	9
137770	3	5	14		137771	3	4	8		137770	4	5	10
137870	3	6	12		137871	4	3	7		137870	3	4	11
137970	3	2	14		137971	2	4	8		137970	5	6	10
138070	4	4	12		138071	3	4	6		138070	4	5	9
138170	4	5	12		138171	5	4	9		138170	5	5	11
138270	3	5	12		138271	3	3	7		138270	3	3	13
138370	2	4	13		138371	3	4	8		138370	4	3	11
138470	3	4	10		138471	5	3	10		138470	4	6	13
138570	2	4	11		138571	4	5	8		138570	4	5	11
138670	3	3	15		138671	2	2	8		138670	4	4	9
138770	3	3	15		138771	3	3	7		138770	3	5	11
138870	3	4	16		138871	4	3	6		138870	3	6	11
138970	4	6	12		138971	2	3	7		138970	4	3	9
139070	3	4	13		139071	3	4	10		139070	3	4	11
139170	4	6	13		139171	3	3	9		139170	3	6	11
139270	4	5	11		139271	2	2	8		139270	3	5	8
139370	3	6	13		139371	3	4	7		139370	5	5	9
139470	2	4	11		139471	2	3	8		139470	3	5	13
139570	4	4	15		139571	2	2	11		139570	4	4	11
139670	4	4	14		139671	3	4	9		139670	5	6	9
139770	4	3	14		139771	3	3	8		139770	5	4	11
139870	3	4	13		139871	3	4	8		139870	3	6	11
139970	4	3	13		139971	3	5	6		139970	2	5	10
140070	3	4	13		140071	3	4	6		140070	4	6	12
140170	3	5	12		140171	5	3	8		140170	4	6	11
140270	3	3	11		140271	2	4	8		140270	3	8	10
140370	4	5	9		140371	3	3	9		140370	4	6	11
140470	3	4	14		140471	3	2	7		140470	4	5	11
140570	4	4	15		140571	3	2	8		140570	3	5	12
140670	4	5	16		140671	3	4	8		140670	4	5	10
140770	3	5	16		140771	3	4	9		140770	6	6	11
140870	3	3	12		140871	2	4	7		140870	3	4	11
140970	3	5	13		140971	3	4	9		140970	4	6	12
141070	3	3	13		141071	4	3	8		141070	5	5	14
141170	3	4	14		141171	3	3	11		141170	3	4	10
141270	3	5	11		141271	3	3	9		141270	4	5	10
141370	3	6	13		141371	3	3	7		141370	5	5	8
141470	3	3	13		141471	4	3	7		141470	5	3	11
141570	3	3	12		141571	2	3	7		141570	5	5	12
141670	4	7	13		141671	3	3	6		141670	3	3	10
141770	3	4	9		141771	3	3	8		141770	3	4	11
141870	2	4	15		141871	2	3	6		141870	4	6	10
141970	2	6	14		141971	3	3	7		141970	3	5	12
142070	2	4	15		142071	4	4	10		142070	3	6	11
142170	3	4	12		142171	3	2	10		142170	2	5	11
142270	3	5	13		142271	3	4	8		142270	4	5	10
142370	3	3	14		142371	3	3	7		142370	4	3	11
142470	4	3	10		142471	4	3	5		142470	4	6	9
142570	4	4	13		142571	3	3	6		142570	4	4	12
142670	4	5	14		142671	2	2	8		142670	3	5	13
142770	4	5	13		142771	2	3	6		142770	4	5	10
142870	3	3	13		142871	3	5	8		142870	3	5	11
142970	5	3	13		142971	2	3	9		142970	3	5	10
143070	2	3	14		143071	3	4	8		143070	4	6	10
143170	3	3	12		143171	4	3	8		143170	3	5	9
143270	3	4	9		143271	2	4	7		143270	4	6	11
143370	4	5	13		143371	4	3	7		143370	4	3	10
143470	1	3	11		143471	3	4	6		143470	4	6	12
143570	3	5	12		143571	3	4	9		143570	4	4	9
143670	4	5	15		143671	3	3	10		143670	4	5	13
143770	4	4	15		143771	2	3	9		143770	5	6	11
143870	3	4	18		143871	4	3	7		143870	4	5	12
143970	3	5	13		143971	3	2	8		143970	3	7	14
144070	3	3	15		144071	4	4	8		144070	5	7	9
144170	5	3	13		144171	3	5	8		144170	3	6	10
144270	3	3	14		144271	4	3	9		144270	4	5	10
144370	2	4	13		144371	2	5	8		144370	4	7	9
144470	5	5	13		144471	3	4	7		144470	2	6	12
144570	4	3	16		144571	4	3	9		144570	4	5	12
144670	2	4	11		144671	3	3	9		144670	4	5	11
144770	3	7	12		144771	3	3	9		144770	4	6	8
144870	3	5	7		144871	3	3	7		144870	3	6	9
144970	4	4	12		144971	3	4	9		144970	3	4	10
145070	2	4	15		145071	3	3	9		145070	3	4	11
145170	3	5	12		145171	2	3	8		145170	6	6	10
145270	5	3	14		145271	3	3	7		145270	2	6	9
145370	3	6	15		145371	4	3	8		145370	3	7	11
145470	2	3	12		145471	2	3	9		145470	4	6	10
145570	2	5	11		145571	3	3	10		145570	4	5	11
145670	4	5	12		145671	3	3	6		145670	3	5	12
145770	3	5	13		145771	3	3	7		145770	3	5	10
145870	2	3	10		145871	2	4	8		145870	2	5	10
145970	3	4	11		145971	4	4	8		145970	3	6	13
146070	2	4	14		146071	2	3	8		146070	4	4	12
146170	3	4	16		146171	3	4	8		146170	3	6	12
146270	2	4	14		146271	2	4	8		146270	5	5	10
146370	4	5	15		146371	3	4	8		146370	4	5	9
146470	4	4	14		146471	2	3	9		146470	3	6	11
146570	4	4	13		146571	2	2	7		146570	3	5	10
146670	3	4	10		146671	3	3	8		146670	2	7	11
146770	3	4	14		146771	3	2	8		146770	4	6	10
146870	3	6	16		146871	4	3	8		146870	4	7	11
146970	3	5	14		146971	5	5	6		146970	3	6	11
147070	3	5	13		147071	2	2	9		147070	3	5	9
147170	3	2	15		147171	3	3	10		147170	3	4	9
147270	2	6	11		147271	4	2	8		147270	2	5	10
147370	4	4	11		147371	2	4	9		147370	3	6	12
147470	3	4	12		147471	4	4	5		147470	3	4	8
147570	5	3	14		147571	2	4	8		147570	4	4	9
147670	2	4	13		147671	2	4	6		147670	4	5	9
147770	3	5	10		147771	4	3	9		147770	5	5	11
147870	2	2	12		147871	1	5	9		147870	3	6	8
147970	4	3	14		147971	3	4	8		147970	5	4	13
148070	3	3	12		148071	4	3	9		148070	3	4	13
148170	4	3	11		148171	4	2	9		148170	3	5	11
148270	3	6	13		148271	4	3	8		148270	3	5	10
148370	4	3	12		148371	3	5	9		148370	4	5	11
148470	3	4	13		148471	3	3	12		148470	3	5	11
148570	2	2	11		148571	2	5	6		148570	3	5	9
148670	3	4	11		148671	2	4	9		148670	3	6	10
148770	3	4	14		148771	2	2	9		148770	4	5	11
148870	2	5	12		148871	3	3	9		148870	3	6	10
148970	3	5	12		148971	2	2	9		148970	3	5	12
149070	2	4	12		149071	3	4	8		149070	4	5	11
149170	3	4	14		149171	3	4	5		149170	4	4	10
149270	2	3	13		149271	2	3	8		149270	3	5	9
149370	2	3	9		149371	3	4	7		149370	3	6	12
149470	3	5	12		149471	3	3	7		149470	2	6	10
149570	2	4	10		149571	3	3	8		149570	4	5	14
149670	3	6	11		149671	3	2	6		149670	4	5	8
149770	3	5	14		149771	3	4	8		149770	3	5	10
149870	4	2	12		149871	3	5	9		149870	4	3	8
149970	3	4	15		149971	2	3	8		149970	4	5	11
150070	2	4	12		150071	2	3	9		150070	6	6	10
150170	3	4	10		150171	4	2	8		150170	3	5	13
150270	1	2	12		150271	2	4	8		150270	3	5	13
150370	4	3	14		150371	4	6	10		150370	2	6	9
150470	2	5	14		150471	3	3	6		150470	3	6	9
150570	3	4	13		150571	2	3	8		150570	2	5	11
150670	3	3	13		150671	2	4	8		150670	3	3	8
150770	2	4	15		150771	3	4	8		150770	4	6	10
150870	2	4	12		150871	2	2	11		150870	3	4	10
150970	2	5	13		150971	2	4	9		150970	3	4	15
151070	1	2	15		151071	5	4	8		151070	2	5	11
151170	3	4	12		151171	3	3	8		151170	3	5	10
151270	2	3	14		151271	5	4	6		151270	4	5	9
151370	3	4	14		151371	4	4	8		151370	4	5	9
151470	4	4	13		151471	2	4	7		151470	2	6	9
151570	3	5	13		151571	2	3	7		151570	3	5	10
151670	3	5	13		151671	2	3	5		151670	3	4	10
151770	2	5	10		151771	3	4	8		151770	4	4	12
151870	2	5	15		151871	4	4	6		151870	4	5	9
151970	4	4	18		151971	3	5	9		151970	4	5	10
152070	3	4	16		152071	3	5	7		152070	3	4	10
152170	3	6	15		152171	2	4	7		152170	3	7	10
152270	3	4	11		152271	3	3	9		152270	3	7	10
152370	3	3	12		152371	2	4	8		152370	3	5	11
152470	3	5	12		152471	3	3	7		152470	2	4	13
152570	3	4	14		152571	2	2	7		152570	2	7	9
152670	1	4	12		152671	3	2	7		152670	3	3	7
152770	4	4	14		152771	4	5	8		152770	2	4	11
152870	2	4	13		152871	4	4	8		152870	3	3	12
152970	3	4	13		152971	1	3	9		152970	3	6	10
153070	5	4	11		153071	3	3	7		153070	2	5	10
153170	2	4	14		153171	3	3	6		153170	3	5	10
153270	2	4	14		153271	3	4	9		153270	3	4	11
153370	3	4	11		153371	2	3	9		153370	4	5	12
153470	3	4	13		153471	2	5	7		153470	4	5	11
153570	3	5	15		153571	4	3	9		153570	3	5	11
153670	3	3	10		153671	4	4	8		153670	4	4	14
153770	3	4	11		153771	3	2	8		153770	4	5	11
153870	3	5	14		153871	4	3	10		153870	3	5	12
153970	3	4	12		153971	3	3	6		153970	3	6	11
154070	1	6	10		154071	4	3	9		154070	4	4	10
154170	3	4	13		154171	3	4	10		154170	3	5	13
154270	2	5	11		154271	4	2	9		154270	1	5	13
154370	3	4	13		154371	3	3	8		154370	3	6	10
154470	4	3	14		154471	3	3	7		154470	3	4	11
154570	1	3	11		154571	3	3	8		154570	3	5	8
154670	3	4	15		154671	2	5	9		154670	3	4	10
154770	2	4	13		154771	2	4	7		154770	4	4	9
154870	3	5	13		154871	3	3	10		154870	3	5	8
154970	3	4	11		154971	2	5	7		154970	2	8	10
155070	3	4	14		155071	3	3	8		155070	4	5	12
155170	3	4	14		155171	3	3	6		155170	2	4	12
155270	2	3	12		155271	3	3	7		155270	3	5	11
155370	3	4	14		155371	2	3	11		155370	3	6	9
155470	2	5	14		155471	3	2	8		155470	2	5	9
155570	4	6	12		155571	3	3	7		155570	2	4	11
155670	2	4	15		155671	2	4	8		155670	4	5	8
155770	2	4	12		155771	2	3	8		155770	2	5	12
155870	3	5	14		155871	2	3	7		155870	4	4	10
155970	3	5	17		155971	2	4	6		155970	5	4	9
156070	3	6	12		156071	3	3	9		156070	3	5	9
156170	3	4	13		156171	3	4	7		156170	3	5	11
156270	5	3	13		156271	2	3	7		156270	4	6	13
156370	3	3	13		156371	2	4	9		156370	2	5	9
156470	3	4	12		156471	3	3	6		156470	3	4	12
156570	3	5	16		156571	1	4	7		156570	2	6	11
156670	4	6	12		156671	3	4	8		156670	3	3	14
156770	3	5	13		156771	2	2	8		156770	2	5	9
156870	4	5	13		156871	3	3	8		156870	3	5	12
156970	2	5	14		156971	3	3	6		156970	4	5	9
157070	3	4	15		157071	2	3	7		157070	3	5	9
157170	4	4	13		157171	1	2	10		157170	3	5	11
157270	2	5	14		157271	2	2	8		157270	2	5	9
157370	3	5	12		157371	2	3	8		157370	3	4	11
157470	3	5	13		157471	2	3	7		157470	3	5	10
157570	1	5	12		157571	2	2	7		157570	1	7	11
157670	2	3	15		157671	1	5	7		157670	3	5	13
157770	3	3	17		157771	2	4	8		157770	3	6	10
157870	5	3	11		157871	3	2	8		157870	5	4	12
157970	3	4	15		157971	4	3	10		157970	2	6	10
158070	3	5	12		158071	2	5	8		158070	2	6	13
158170	2	3	12		158171	1	3	9		158170	2	6	11
158270	4	4	14		158271	2	4	9		158270	4	5	9
158370	3	5	13		158371	4	4	8		158370	3	5	11
158470	2	5	15		158471	3	5	7		158470	3	5	8
158570	4	4	15		158571	3	4	9		158570	4	4	12
158670	2	4	11		158671	3	4	8		158670	2	5	11
158770	3	7	13		158771	2	2	8		158770	3	6	10
158870	3	5	13		158871	2	2	7		158870	4	5	9
158970	2	5	13		158971	3	3	9		158970	4	5	11
159070	3	4	14		159071	3	3	8		159070	4	5	10
159170	2	3	15		159171	3	4	6		159170	2	4	11
159270	2	3	17		159271	3	2	6		159270	3	4	11
159370	4	2	14		159371	2	3	9		159370	2	5	11
159470	2	4	15		159471	2	4	9		159470	3	5	11
159570	4	3	15		159571	3	3	11		159570	2	5	8
159670	2	3	14		159671	4	5	7		159670	3	5	9
159770	2	3	10		159771	1	3	5		159770	4	5	10
159870	2	5	12		159871	2	3	9		159870	4	4	11
159970	3	2	14		159971	4	3	7		159970	2	5	8
160070	3	4	13		160071	2	4	8		160070	4	5	10
160170	3	5	12		160171	3	3	9		160170	3	5	7
160270	3	5	15		160271	4	2	8		160270	4	5	12
160370	2	4	15		160371	3	3	8		160370	3	5	9
160470	2	6	12		160471	2	3	8		160470	2	6	12
160570	2	3	14		160571	4	4	8		160570	3	4	10
160670	1	4	13		160671	3	3	8		160670	2	4	11
160770	4	4	12		160771	3	5	7		160770	3	4	11
160870	2	5	13		160871	3	3	8		160870	3	6	8
160970	3	3	11		160971	2	3	8		160970	3	4	9
161070	3	2	12		161071	3	4	9		161070	4	3	12
161170	3	6	14		161171	3	3	8		161170	2	4	12
161270	2	5	12		161271	3	3	7		161270	4	4	10
161370	3	3	12		161371	2	4	10		161370	3	4	11
161470	1	4	11		161471	2	4	8		161470	3	4	9
161570	2	4	12		161571	1	4	9		161570	3	4	8
161670	4	3	12		161671	3	1	7		161670	2	5	9
161770	3	5	10		161771	3	3	9		161770	5	4	10
161870	3	6	14		161871	2	2	8		161870	2	4	11
161970	4	4	14		161971	3	2	9		161970	3	4	8
162070	2	4	14		162071	2	3	7		162070	2	5	11
162170	2	4	13		162171	4	2	6		162170	3	5	13
162270	3	6	13		162271	2	5	9		162270	2	4	9
162370	2	5	11		162371	3	3	8		162370	3	5	10
162470	3	3	11		162471	2	4	9		162470	4	6	10
162570	3	3	13		162571	4	3	9		162570	3	4	10
162670	3	3	12		162671	2	4	8		162670	3	4	10
162770	3	4	13		162771	3	4	8		162770	3	4	10
162870	2	4	14		162871	2	3	8		162870	4	6	10
162970	4	5	13		162971	2	3	7		162970	2	4	12
163070	2	4	12		163071	1	4	9		163070	3	7	9
163170	3	4	11		163171	2	2	6		163170	3	4	11
163270	2	2	13		163271	4	3	6		163270	3	5	10
163370	1	5	16		163371	2	3	8		163370	2	6	9
163470	4	4	12		163471	2	3	7		163470	3	5	10
163570	2	3	12		163571	2	2	8		163570	3	4	7
163670	3	2	10		163671	2	4	7		163670	4	4	14
163770	2	5	12		163771	2	4	8		163770	2	5	13
163870	2	4	14		163871	3	5	6		163870	2	4	9
163970	3	4	13		163971	1	3	5		163970	3	5	12
164070	4	5	15		164071	4	4	5		164070	4	4	8
164170	2	4	11		164171	3	4	6		164170	3	4	10
164270	2	3	15		164271	3	3	8		164270	2	4	9
164370	4	4	15		164371	2	3	10		164370	2	3	11
164470	3	4	13		164471	4	2	8		164470	3	4	9
164570	3	7	13		164571	3	2	11		164570	3	6	13
164670	3	4	13		164671	3	2	8		164670	4	3	8
164770	2	3	14		164771	3	4	9		164770	3	4	13
164870	3	5	13		164871	3	3	8		164870	2	5	11
164970	3	3	12		164971	2	3	7		164970	2	5	12
165070	2	5	12		165071	3	3	7		165070	2	5	10
165170	3	5	13		165171	2	4	8		165170	2	6	10
165270	2	4	12		165271	2	4	9		165270	2	4	12
165370	2	4	12		165371	2	4	8		165370	3	6	10
165470	2	4	11		165471	2	3	7		165470	3	3	9
165570	2	3	11		165571	2	2	7		165570	3	4	10
165670	2	4	13		165671	2	3	7		165670	6	8	11
165770	3	5	13		165771	1	2	5		165770	2	7	10
165870	3	4	15		165871	2	4	6		165870	2	4	10
165970	3	3	11		165971	5	3	8		165970	2	4	11
166070	2	5	14		166071	3	3	8		166070	2	5	10
166170	2	3	13		166171	3	3	7		166170	2	4	10
166270	2	4	15		166271	2	3	9		166270	4	5	11
166370	2	3	12		166371	1	3	8		166370	2	4	12
166470	3	4	11		166471	3	2	9		166470	3	6	11
166570	3	5	13		166571	2	6	8		166570	3	4	10
166670	2	4	12		166671	3	2	9		166670	3	5	11
166770	4	6	13		166771	3	3	6		166770	2	4	12
166870	3	4	15		166871	3	2	8		166870	3	4	11
166970	3	4	13		166971	1	4	8		166970	4	3	11
167070	3	5	13		167071	2	3	7		167070	3	5	9
167170	3	4	16		167171	2	2	7		167170	2	5	10
167270	4	6	15		167271	2	3	9		167270	3	5	13
167370	3	3	14		167371	3	4	8		167370	2	5	11
167470	2	6	10		167471	3	4	6		167470	4	4	7
167570	4	5	11		167571	3	5	7		167570	2	6	14
167670	3	3	12		167671	2	2	9		167670	3	6	10
167770	4	6	12		167771	2	5	7		167770	3	4	12
167870	2	6	16		167871	2	3	9		167870	3	4	11
167970	2	4	15		167971	2	3	7		167970	3	5	10
168070	3	3	13		168071	2	4	8		168070	2	4	13
168170	2	3	13		168171	2	3	6		168170	2	7	8
168270	3	4	14		168271	4	2	8		168270	3	5	11
168370	3	4	13		168371	3	3	9		168370	1	6	9
168470	3	3	11		168471	3	3	9		168470	4	3	9
168570	2	5	10		168571	2	3	6		168570	2	4	12
168670	3	2	15		168671	2	3	6		168670	3	5	12
168770	2	5	16		168771	2	3	8		168770	4	4	8
168870	2	7	15		168871	3	4	5		168870	3	6	10
168970	3	5	16		168971	4	2	8		168970	3	6	8
169070	2	5	10		169071	2	4	10		169070	4	5	13
169170	2	4	13		169171	3	4	10		169170	3	4	11
169270	2	5	14		169271	2	4	7		169270	1	5	10
169370	2	4	14		169371	3	5	7		169370	2	5	8
169470	2	6	16		169471	4	3	6		169470	3	6	10
169570	5	4	11		169571	3	3	9		169570	2	5	11
169670	3	4	10		169671	2	2	10		169670	3	4	11
169770	3	4	15		169771	3	3	6		169770	2	4	8
169870	2	5	14		169871	2	3	7		169870	4	4	13
169970	3	4	13		169971	2	4	6		169970	3	4	11
170070	3	4	14		170071	2	3	7		170070	3	6	8
170170	3	5	12		170171	2	3	9		170170	4	7	10
170270	2	3	13		170271	3	5	7		170270	3	4	8
170370	4	3	14		170371	1	3	9		170370	2	4	13
170470	2	5	13		170471	2	2	8		170470	3	3	10
170570	2	4	14		170571	1	3	11		170570	3	3	8
170670	4	5	12		170671	3	3	7		170670	2	3	10
170770	3	4	15		170771	3	4	7		170770	2	6	10
170870	2	4	15		170871	3	3	7		170870	5	5	11
170970	3	4	13		170971	1	4	8		170970	2	5	8
171070	2	4	13		171071	2	3	6		171070	3	2	11
171170	3	4	13		171171	3	3	8		171170	3	5	11
171270	3	6	11		171271	3	3	7		171270	2	5	11
171370	3	5	12		171371	2	2	8		171370	3	5	10
171470	2	3	11		171471	3	5	9		171470	2	6	12
171570	3	3	12		171571	3	3	7		171570	2	6	11
171670	3	5	15		171671	2	4	7		171670	2	6	10
171770	3	4	9		171771	3	3	8		171770	2	3	12
171870	3	5	12		171871	2	2	11		171870	3	4	13
171970	2	4	14		171971	3	3	9		171970	2	4	9
172070	2	4	10		172071	2	2	6		172070	1	6	9
172170	4	4	12		172171	2	3	9		172170	3	5	10
172270	2	3	14		172271	2	4	7		172270	3	6	8
172370	2	3	14		172371	3	2	6		172370	2	4	12
172470	3	3	13		172471	1	3	8		172470	2	4	11
172570	3	5	12		172571	1	3	9		172570	2	4	7
172670	3	3	15		172671	3	4	8		172670	3	4	10
172770	2	4	14		172771	1	3	8		172770	3	4	11
172870	2	4	13		172871	4	3	9		172870	4	5	9
172970	3	4	16		172971	2	2	9		172970	4	6	11
173070	2	5	12		173071	4	3	8		173070	2	4	9
173170	2	4	13		173171	4	3	9		173170	2	3	9
173270	2	4	14		173271	4	3	7		173270	2	4	9
173370	2	3	14		173371	3	4	7		173370	3	4	8
173470	3	3	13		173471	3	4	7		173470	3	3	9
173570	3	5	14		173571	3	4	6		173570	2	4	8
173670	2	5	17		173671	2	4	8		173670	4	3	11
173770	2	4	12		173771	2	3	8		173770	2	6	12
173870	3	4	13		173871	3	2	7		173870	3	5	10
173970	2	3	13		173971	2	3	6		173970	4	5	11
174070	2	4	13		174071	2	4	9		174070	3	4	10
174170	3	2	12		174171	3	2	6		174170	3	5	13
174270	2	4	14		174271	1	4	9		174270	2	4	10
174370	2	4	13		174371	3	4	9		174370	3	3	9
174470	3	5	11		174471	3	3	7		174470	2	6	10
174570	3	2	11		174571	3	3	9		174570	2	5	10
174670	4	4	16		174671	3	3	8		174670	1	4	13
174770	3	4	16		174771	2	3	5		174770	2	4	9
174870	3	4	10		174871	2	3	10		174870	3	3	10
174970	2	4	14		174971	3	2	9		174970	3	4	9
175070	2	5	13		175071	3	4	7		175070	2	4	9
175170	3	4	13		175171	2	4	9		175170	1	3	10
175270	3	3	13		175271	3	3	5		175270	3	5	10
175370	3	5	13		175371	1	3	10		175370	3	4	15
175470	3	4	16		175471	3	4	6		175470	2	3	9
175570	2	5	14		175571	2	3	7		175570	2	4	10
175670	3	6	12		175671	4	2	6		175670	3	5	8
175770	2	3	12		175771	2	4	6		175770	2	4	13
175870	2	4	13		175871	2	4	7		175870	3	5	13
175970	3	4	12		175971	2	4	8		175970	4	4	12
176070	3	4	14		176071	1	5	7		176070	4	4	9
176170	3	3	15		176171	2	3	6		176170	2	6	7
176270	2	5	10		176271	3	4	7		176270	2	5	8
176370	2	4	13		176371	1	2	8		176370	2	5	12
176470	2	4	13		176471	2	3	5		176470	2	4	12
176570	3	4	14		176571	3	3	7		176570	3	5	9
176670	2	5	13		176671	3	4	7		176670	2	7	11
176770	1	4	14		176771	3	1	7		176770	2	6	14
176870	3	3	14		176871	2	3	10		176870	2	5	8
176970	3	4	10		176971	3	3	9		176970	2	5	7
177070	3	5	12		177071	3	3	8		177070	4	5	9
177170	4	3	15		177171	2	3	8		177170	2	4	10
177270	3	3	13		177271	2	4	8		177270	2	4	10
177370	2	4	14		177371	1	3	10		177370	3	5	9
177470	2	4	13		177471	1	3	11		177470	2	3	10
177570	2	4	15		177571	2	3	5		177570	3	4	9
177670	1	3	12		177671	2	3	7		177670	2	4	11
177770	2	5	14		177771	2	4	10		177770	2	5	11
177870	3	4	15		177871	2	3	6		177870	3	5	8
177970	3	3	13		177971	2	3	7		177970	3	3	8
178070	1	3	16		178071	3	4	6		178070	2	6	10
178170	3	2	14		178171	2	3	9		178170	2	3	9
178270	3	3	14		178271	2	3	7		178270	2	6	10
178370	2	3	12		178371	2	4	6		178370	3	6	8
178470	4	4	12		178471	3	4	8		178470	2	5	11
178570	2	6	13		178571	2	2	7		178570	4	2	8
178670	1	5	15		178671	2	4	8		178670	2	5	8
178770	4	2	17		178771	2	2	7		178770	2	4	10
178870	3	4	13		178871	3	4	6		178870	3	5	11
178970	3	4	11		178971	2	3	8		178970	2	5	9
179070	4	3	13		179071	3	4	6		179070	2	6	8
179170	2	5	14		179171	1	4	7		179170	3	4	10
179270	3	4	10		179271	3	2	7		179270	2	5	13
179370	2	5	14		179371	3	3	6		179370	2	4	8
179470	2	3	12		179471	3	5	7		179470	2	4	9
179570	2	4	14		179571	2	2	8		179570	3	3	11
179670	3	3	10		179671	3	2	8		179670	3	5	8
179770	3	3	14		179771	3	3	6		179770	3	3	9
179870	3	3	13		179871	3	3	10		179870	2	3	9
179970	3	3	13		179971	2	3	8		179970	4	5	10
180070	2	5	15		180071	2	4	8		180070	2	4	9
180170	2	4	10		180171	2	2	8		180170	2	4	10
180270	3	5	12		180271	2	5	8		180270	2	4	9
180370	3	5	13		180371	2	4	8		180370	3	3	10
180470	2	4	14		180471	4	3	7		180470	3	5	12
180570	3	4	15		180571	3	3	6		180570	3	5	11
180670	2	4	11		180671	3	2	9		180670	2	6	11
180770	2	4	12		180771	3	4	7		180770	3	4	9
180870	3	4	12		180871	2	2	8		180870	2	5	9
180970	2	5	11		180971	3	3	8		180970	3	4	11
181070	2	4	14		181071	3	3	8		181070	1	6	12
181170	2	4	13		181171	1	4	7		181170	4	4	12
181270	2	3	13		181271	1	3	8		181270	3	5	10
181370	3	4	10		181371	3	4	10		181370	3	4	12
181470	2	4	13		181471	2	4	7		181470	2	5	10
181570	3	4	10		181571	3	3	6		181570	2	5	11
181670	3	4	12		181671	2	4	6		181670	2	4	11
181770	3	4	17		181771	2	3	9		181770	3	6	9
181870	3	5	14		181871	4	3	9		181870	2	3	10
181970	3	3	16		181971	3	4	8		181970	2	5	8
182070	4	3	14		182071	1	3	8		182070	1	5	9
182170	3	5	12		182171	1	2	8		182170	3	5	9
182270	2	6	14		182271	2	2	7		182270	2	6	11
182370	1	4	11		182371	2	2	6		182370	2	5	8
182470	2	4	13		182471	1	4	11		182470	3	4	8
182570	4	4	13		182571	3	3	8		182570	2	4	9
182670	2	6	13		182671	3	4	7		182670	4	5	9
182770	3	3	14		182771	2	2	5		182770	3	5	10
182870	2	4	15		182871	2	4	8		182870	2	3	8
182970	3	3	15		182971	2	2	8		182970	3	4	10
183070	2	4	14		183071	2	4	7		183070	1	4	11
183170	2	4	17		183171	2	2	9		183170	2	6	10
183270	2	4	11		183271	1	4	11		183270	2	4	10
183370	3	4	13		183371	3	3	9		183370	3	5	13
183470	3	4	11		183471	2	2	7		183470	2	4	10
183570	3	4	14		183571	2	3	6		183570	2	7	12
183670	2	3	15		183671	2	4	7		183670	3	4	11
183770	2	4	14		183771	1	4	9		183770	2	6	12
183870	2	4	11		183871	2	3	8		183870	3	4	10
183970	3	5	13		183971	2	3	7		183970	2	4	10
184070	2	4	16		184071	2	4	8		184070	4	5	8
184170	3	5	14		184171	3	3	7		184170	3	4	10
184270	2	3	12		184271	1	3	7		184270	3	5	10
184370	1	4	11		184371	2	2	9		184370	4	4	13
184470	4	3	12		184471	1	3	7		184470	3	5	10
184570	4	4	14		184571	2	3	8		184570	2	3	11
184670	2	4	13		184671	3	2	8		184670	2	4	7
184770	3	6	13		184771	1	3	8		184770	3	5	10
184870	2	3	14		184871	3	3	8		184870	2	4	10
184970	2	6	11		184971	1	3	8		184970	3	5	12
185070	2	5	14		185071	1	2	7		185070	2	3	8
185170	2	2	13		185171	3	3	6		185170	2	4	10
185270	3	4	10		185271	2	3	6		185270	3	4	9
185370	2	4	14		185371	3	3	7		185370	2	4	9
185470	2	3	14		185471	2	3	9		185470	2	5	11
185570	2	5	14		185571	1	4	8		185570	2	2	9
185670	2	5	12		185671	3	4	8		185670	1	4	10
185770	2	4	14		185771	2	4	7		185770	2	5	11
185870	3	4	13		185871	2	3	6		185870	2	4	9
185970	3	6	14		185971	2	3	7		185970	2	3	9
186070	2	5	15		186071	2	3	8		186070	2	4	9
186170	2	4	15		186171	2	2	8		186170	4	3	12
186270	2	4	12		186271	3	5	8		186270	3	6	11
186370	3	5	15		186371	2	3	8		186370	2	4	10
186470	3	4	12		186471	2	2	7		186470	3	4	12
186570	3	5	14		186571	2	2	6		186570	2	4	9
186670	3	3	14		186671	2	3	6		186670	1	4	12
186770	3	2	13		186771	1	3	7		186770	2	3	11
186870	2	5	14		186871	2	3	9		186870	3	7	7
186970	3	4	13		186971	2	2	8		186970	2	5	8
187070	3	5	12		187071	2	2	7		187070	3	5	11
187170	2	4	15		187171	2	4	7		187170	3	5	9
187270	2	4	12		187271	3	4	8		187270	2	4	10
187370	3	5	9		187371	2	4	9		187370	3	7	10
187470	2	4	17		187471	2	2	7		187470	2	5	11
187570	2	5	14		187571	2	5	6		187570	1	5	9
187670	2	5	12		187671	3	2	7		187670	2	4	11
187770	3	4	12		187771	2	3	8		187770	1	5	8
187870	3	4	13		187871	3	4	8		187870	3	6	9
187970	2	3	10		187971	1	4	9		187970	2	6	7
188070	3	3	13		188071	4	3	8		188070	2	5	11
188170	2	4	11		188171	1	4	5		188170	3	4	9
188270	3	4	12		188271	2	3	6		188270	2	4	12
188370	2	4	12		188371	3	4	8		188370	3	5	9
188470	3	4	11		188471	2	2	9		188470	2	6	10
188570	3	5	12		188571	2	3	9		188570	2	4	11
188670	2	3	14		188671	2	4	7		188670	2	4	10
188770	2	3	18		188771	3	3	9		188770	3	5	10
188870	2	3	14		188871	3	3	7		188870	3	4	10
188970	2	4	13		188971	2	4	7		188970	3	4	8
189070	3	5	13		189071	2	3	8		189070	2	5	8
189170	2	3	15		189171	2	2	4		189170	2	4	12
189270	2	4	10		189271	2	3	6		189270	2	4	11
189370	2	3	13		189371	3	4	8		189370	3	3	10
189470	2	3	11		189471	2	3	7		189470	2	5	9
189570	2	3	12		189571	3	2	8		189570	2	5	12
189670	3	5	14		189671	1	3	7		189670	2	6	10
189770	3	4	16		189771	2	2	7		189770	3	5	11
189870	2	5	13		189871	3	3	9		189870	4	5	10
189970	3	4	13		189971	3	2	6		189970	1	5	10
190070	3	3	12		190071	3	4	7		190070	2	6	12
190170	1	5	13		190171	2	5	8		190170	2	4	14
190270	2	3	14		190271	2	3	6		190270	2	3	10
190370	2	2	11		190371	2	3	7		190370	3	4	10
190470	2	4	13		190471	2	3	7		190470	2	4	10
190570	3	3	14		190571	4	3	6		190570	3	5	11
190670	2	4	12		190671	2	3	7		190670	2	3	9
190770	2	4	12		190771	3	3	9		190770	2	5	12
190870	2	2	12		190871	2	3	8		190870	2	7	11
190970	3	4	10		190971	3	5	10		190970	3	6	10
191070	3	4	15		191071	2	2	9		191070	4	4	11
191170	3	3	12		191171	2	3	6		191170	2	5	11
191270	3	4	15		191271	2	5	7		191270	3	5	11
191370	3	3	15		191371	2	6	6		191370	2	5	10
191470	3	4	14		191471	2	3	7		191470	2	4	11
191570	3	4	13		191571	2	5	8		191570	4	3	11
191670	3	4	15		191671	2	2	6		191670	2	3	10
191770	3	4	15		191771	2	3	8		191770	3	6	13
191870	2	4	14		191871	1	4	5		191870	3	5	10
191970	2	4	12		191971	1	3	9		191970	3	6	8
192070	2	4	13		192071	2	4	4		192070	1	5	8
192170	2	4	15		192171	3	5	7		192170	2	4	11
192270	2	5	11		192271	2	4	7		192270	2	5	10
192370	3	2	14		192371	4	4	9		192370	2	4	11
192470	3	4	14		192471	2	4	8		192470	2	5	11
192570	3	3	11		192571	1	2	8		192570	3	5	11
192670	3	5	14		192671	3	2	7		192670	3	5	11
192770	3	5	12		192771	2	2	8		192770	2	6	10
192870	2	4	12		192871	3	3	9		192870	2	4	9
192970	2	5	13		192971	1	2	7		192970	2	4	10
193070	2	6	11		193071	2	2	8		193070	3	6	12
193170	3	3	12		193171	2	3	7		193170	2	6	10
193270	3	5	14		193271	2	4	8		193270	3	3	11
193370	2	3	12		193371	3	4	6		193370	4	2	11
193470	2	7	12		193471	2	3	6		193470	2	5	10
193570	3	4	13		193571	2	4	10		193570	2	4	8
193670	1	3	13		193671	2	3	9		193670	2	4	11
193770	4	3	14		193771	1	4	7		193770	2	2	11
193870	3	5	14		193871	2	4	8		193870	3	4	12
193970	2	5	13		193971	2	2	8		193970	2	5	10
194070	2	2	14		194071	2	3	9		194070	2	4	10
194170	2	6	16		194171	2	4	9		194170	2	3	12
194270	4	3	11		194271	3	4	8		194270	2	3	11
194370	3	3	18		194371	1	3	8		194370	3	3	9
194470	3	5	17		194471	3	3	8		194470	2	5	10
194570	4	3	14		194571	2	2	6		194570	1	5	10
194670	2	5	11		194671	3	2	7		194670	4	3	9
194770	3	4	11		194771	1	3	8		194770	2	4	14
194870	2	3	15		194871	2	3	7		194870	2	4	11
194970	3	4	12		194971	1	3	7		194970	2	5	9
195070	2	4	14		195071	2	2	7		195070	3	3	10
195170	2	5	11		195171	2	2	7		195170	3	4	13
195270	2	3	15		195271	3	2	6		195270	2	5	9
195370	3	4	14		195371	1	4	8		195370	2	7	11
195470	3	5	13		195471	2	3	9		195470	2	5	12
195570	2	4	15		195571	2	2	5		195570	2	5	8
195670	2	3	17		195671	3	2	5		195670	3	4	10
195770	2	5	12		195771	1	4	8		195770	2	4	9
195870	1	3	13		195871	2	4	6		195870	1	5	11
195970	2	4	15		195971	1	3	8		195970	2	3	9
196070	3	2	12		196071	2	3	9		196070	3	3	10
196170	2	3	13		196171	2	3	8		196170	2	5	10
196270	2	5	13		196271	3	2	9		196270	2	5	9
196370	3	4	15		196371	1	3	7		196370	3	6	6
196470	2	3	9		196471	1	3	8		196470	2	5	8
196570	2	5	12		196571	3	3	9		196570	3	4	10
196670	2	4	13		196671	2	2	10		196670	3	5	10
196770	2	3	11		196771	1	3	5		196770	4	4	10
196870	2	4	13		196871	2	3	6		196870	3	3	9
196970	3	5	12		196971	2	3	9		196970	2	5	8
197070	2	5	13		197071	2	4	6		197070	2	6	10
197170	2	2	13		197171	2	3	8		197170	2	5	10
197270	3	4	16		197271	1	3	7		197270	2	4	9
197370	1	4	15		197371	2	3	5		197370	2	3	12
197470	3	2	13		197471	3	3	8		197470	2	6	11
197570	2	3	13		197571	2	3	8		197570	2	5	8
197670	3	3	15		197671	2	2	7		197670	2	4	8
197770	3	5	15		197771	2	2	7		197770	3	3	11
197870	2	3	14		197871	3	3	7		197870	3	3	9
197970	3	2	11		197971	2	4	9		197970	2	3	9
198070	2	7	14		198071	1	4	6		198070	2	5	9
198170	2	4	14		198171	2	3	7		198170	2	4	12
198270	3	4	14		198271	2	2	7		198270	1	4	9
198370	2	3	13		198371	2	2	6		198370	2	6	9
198470	3	4	12		198471	2	2	7		198470	1	5	12
198570	1	4	13		198571	2	3	7		198570	2	7	8
198670	3	5	16		198671	2	3	7		198670	2	5	7
198770	4	6	11		198771	1	3	4		198770	2	3	9
198870	3	4	15		198871	2	4	7		198870	3	5	12
198970	3	4	16		198971	3	3	7		198970	1	5	10
199070	2	3	12		199071	1	3	8		199070	1	4	10
199170	2	3	15		199171	2	2	6		199170	1	4	7
199270	3	4	14		199271	3	3	7		199270	2	4	11
199370	3	4	13		199371	2	3	7		199370	1	3	11
199470	2	5	12		199471	3	2	10		199470	3	5	11
199570	2	4	12		199571	2	2	7		199570	2	5	10
199670	2	3	11		199671	1	2	5		199670	2	6	11
199770	2	4	12		199771	1	3	6		199770	3	5	11
199870	2	4	13		199871	2	4	8		199870	2	5	10
199970	3	4	12		199971	1	4	9		199970	2	4	9
200070	3	5	13		200071	3	2	7		200070	2	4	10
200170	2	4	15		200171	3	3	9		200170	3	6	11
200270	2	4	12		200271	2	3	7		200270	3	5	6
[truncated: 1,002 more rows]

## Sheet: WL C. thermalis
Replicate 1					Replicate 2					Replicate 3
ms	10°C	20°C	30°C		ms	10°C	20°C	30°C		ms	10°C	20°C	30°C
570	163	217	313		570	65	64	72		570	165	202	244
670	134	178	300		670	51	48	60		670	146	173	214
770	119	168	279		770	41	41	51		770	127	146	200
870	123	159	261		870	28	33	51		870	108	125	176
970	94	148	244		970	29	27	41		970	93	114	150
1070	91	138	227		1070	26	21	39		1070	86	97	141
1170	87	128	225		1170	21	20	37		1170	75	97	134
1270	79	112	210		1270	20	20	38		1270	72	84	127
1370	70	113	197		1370	16	22	37		1370	67	74	120
1470	75	110	187		1470	14	23	35		1470	58	68	114
1570	63	99	197		1570	13	17	30		1570	54	65	99
1670	62	96	174		1670	9	17	31		1670	53	60	101
1770	61	93	176		1770	13	11	26		1770	43	55	100
1870	63	92	174		1870	9	14	27		1870	42	53	98
1970	60	95	167		1970	10	12	26		1970	40	46	93
2070	49	88	159		2070	11	15	27		2070	38	46	92
2170	50	85	157		2170	10	12	23		2170	32	51	83
2270	51	84	143		2270	9	15	26		2270	36	44	85
2370	49	82	140		2370	9	15	23		2370	27	46	80
2470	49	77	136		2470	9	11	25		2470	30	40	79
2570	41	81	148		2570	9	13	23		2570	28	44	74
2670	47	80	138		2670	9	12	23		2670	26	36	68
2770	45	68	133		2770	10	11	24		2770	27	40	71
2870	44	68	130		2870	7	10	24		2870	27	38	80
2970	43	81	119		2970	7	13	22		2970	25	40	64
3070	39	67	118		3070	9	11	19		3070	21	35	69
3170	42	64	115		3170	7	9	19		3170	23	34	69
3270	43	71	127		3270	6	8	18		3270	21	32	67
3370	38	65	115		3370	6	9	22		3370	22	36	67
3470	38	71	127		3470	6	10	19		3470	23	32	61
3570	39	65	120		3570	6	11	17		3570	22	30	61
3670	40	59	112		3670	7	9	21		3670	21	29	58
3770	39	64	112		3770	4	9	18		3770	19	33	61
3870	38	65	117		3870	5	10	18		3870	17	25	62
3970	36	62	105		3970	6	10	18		3970	17	34	60
4070	33	60	115		4070	4	10	20		4070	18	31	54
4170	31	60	110		4170	7	9	22		4170	16	30	58
4270	36	62	103		4270	4	9	20		4270	17	30	55
4370	33	62	111		4370	6	10	21		4370	18	27	53
4470	32	65	99		4470	7	9	18		4470	19	25	52
4570	34	56	95		4570	5	8	16		4570	16	29	58
4670	31	51	97		4670	6	8	17		4670	20	31	53
4770	31	49	85		4770	5	8	18		4770	21	27	52
4870	29	47	92		4870	4	9	18		4870	18	28	47
4970	29	48	93		4970	5	6	18		4970	16	25	44
5070	30	53	93		5070	4	9	18		5070	13	29	46
5170	29	55	94		5170	6	8	17		5170	14	22	52
5270	29	48	95		5270	7	6	19		5270	14	30	48
5370	30	48	88		5370	5	8	18		5370	18	25	52
5470	28	45	98		5470	5	8	16		5470	14	26	51
5570	34	48	90		5570	3	7	13		5570	15	27	49
5670	30	52	81		5670	5	7	13		5670	12	25	50
5770	28	53	75		5770	3	6	16		5770	15	24	47
5870	33	45	78		5870	5	9	16		5870	11	22	44
5970	28	45	81		5970	4	9	15		5970	14	23	42
6070	26	44	81		6070	4	9	13		6070	10	22	42
6170	32	45	75		6170	4	9	15		6170	14	22	42
6270	29	47	81		6270	4	4	15		6270	15	21	36
6370	28	46	76		6370	6	7	15		6370	12	21	45
6470	27	41	79		6470	5	6	17		6470	10	23	39
6570	26	44	75		6570	5	9	12		6570	10	21	35
6670	25	42	71		6670	5	5	11		6670	11	17	43
6770	27	38	75		6770	4	5	13		6770	11	25	39
6870	28	42	70		6870	5	7	15		6870	12	20	39
6970	28	39	74		6970	5	7	15		6970	15	20	36
7070	27	36	76		7070	4	8	13		7070	14	23	45
7170	31	45	73		7170	4	6	13		7170	13	21	38
7270	26	42	73		7270	3	8	15		7270	14	17	38
7370	26	37	71		7370	3	7	15		7370	14	21	34
7470	29	43	69		7470	5	6	14		7470	15	16	36
7570	22	45	60		7570	4	6	14		7570	15	18	37
7670	25	41	65		7670	5	8	13		7670	11	21	33
7770	23	33	64		7770	4	5	14		7770	12	18	34
7870	21	35	66		7870	3	7	13		7870	12	19	37
7970	22	39	64		7970	4	7	15		7970	15	19	32
8070	24	41	64		8070	3	7	12		8070	10	19	30
8170	21	36	66		8170	4	8	11		8170	12	14	28
8270	23	36	65		8270	5	6	12		8270	13	18	33
8370	27	38	63		8370	6	7	12		8370	13	14	31
8470	18	41	61		8470	4	8	14		8470	12	18	32
8570	20	34	63		8570	4	6	10		8570	12	17	34
8670	24	33	60		8670	4	9	11		8670	11	19	31
8770	24	36	57		8770	5	5	11		8770	12	15	32
8870	23	33	59		8870	3	6	13		8870	14	18	31
8970	23	30	57		8970	5	7	12		8970	12	15	33
9070	22	33	51		9070	4	8	10		9070	9	17	30
9170	25	28	56		9170	3	6	12		9170	10	16	31
9270	21	34	57		9270	5	6	12		9270	11	18	29
9370	23	33	55		9370	4	4	12		9370	10	17	28
9470	25	34	55		9470	5	6	12		9470	12	16	30
9570	23	34	53		9570	4	7	12		9570	10	19	27
9670	20	32	56		9670	4	6	13		9670	9	16	30
9770	23	32	55		9770	4	5	12		9770	10	14	25
9870	24	35	55		9870	5	6	12		9870	10	15	29
9970	21	32	47		9970	3	8	11		9970	10	16	30
10070	25	31	51		10070	4	5	11		10070	9	15	25
10170	24	36	54		10170	2	7	12		10170	10	15	25
10270	18	34	51		10270	3	5	9		10270	10	15	26
10370	21	30	53		10370	4	6	11		10370	11	14	27
10470	20	31	53		10470	5	6	12		10470	12	15	26
10570	22	25	49		10570	3	3	10		10570	8	15	24
10670	21	29	53		10670	5	5	12		10670	8	11	21
10770	22	33	47		10770	3	7	10		10770	10	15	24
10870	19	27	50		10870	4	4	11		10870	9	13	26
10970	21	33	49		10970	3	3	9		10970	10	12	22
11070	18	30	51		11070	3	5	10		11070	8	12	24
11170	20	32	47		11170	2	5	9		11170	11	15	25
11270	18	30	46		11270	4	4	9		11270	10	14	26
11370	20	27	50		11370	4	5	12		11370	10	12	26
11470	20	31	44		11470	6	5	9		11470	9	12	27
11570	19	26	47		11570	4	4	9		11570	8	13	25
11670	21	26	40		11670	3	6	10		11670	8	13	26
11770	20	26	49		11770	4	4	11		11770	10	14	26
11870	16	28	42		11870	4	5	11		11870	8	12	22
11970	19	32	42		11970	2	5	8		11970	9	15	25
12070	21	22	40		12070	3	4	10		12070	9	15	25
12170	17	28	44		12170	4	6	12		12170	9	10	20
12270	17	29	42		12270	3	5	10		12270	12	13	24
12370	18	25	45		12370	2	4	11		12370	10	14	20
12470	22	30	45		12470	4	4	10		12470	10	13	22
12570	17	24	41		12570	4	5	10		12570	9	12	20
12670	20	25	41		12670	4	5	10		12670	10	14	23
12770	16	26	47		12770	3	4	10		12770	10	12	19
12870	18	27	35		12870	4	4	9		12870	10	10	21
12970	21	25	40		12970	3	6	10		12970	9	10	21
13070	17	28	43		13070	3	6	10		13070	7	11	22
13170	18	28	39		13170	3	5	9		13170	7	12	22
13270	19	28	36		13270	3	4	9		13270	8	11	25
13370	17	24	40		13370	3	5	10		13370	8	11	18
13470	18	25	41		13470	2	6	8		13470	9	12	20
13570	16	27	39		13570	3	5	10		13570	10	10	21
13670	20	25	38		13670	3	6	9		13670	10	12	22
13770	18	22	33		13770	3	4	7		13770	9	10	20
13870	15	25	35		13870	4	3	9		13870	9	10	21
13970	14	23	37		13970	2	3	7		13970	8	13	19
14070	18	20	40		14070	4	4	10		14070	9	12	19
14170	16	23	35		14170	3	5	10		14170	7	10	17
14270	16	24	38		14270	4	4	9		14270	10	12	19
14370	18	22	36		14370	3	4	8		14370	10	11	17
14470	17	24	35		14470	2	3	8		14470	7	9	20
14570	14	23	36		14570	3	4	7		14570	7	12	17
14670	13	26	38		14670	4	3	9		14670	8	13	23
14770	17	21	38		14770	4	4	6		14770	8	10	20
14870	18	22	38		14870	3	4	10		14870	7	9	19
14970	15	23	29		14970	4	3	9		14970	10	12	19
15070	15	22	36		15070	3	4	7		15070	8	8	19
15170	14	22	34		15170	3	4	8		15170	7	10	17
15270	14	20	30		15270	2	5	9		15270	8	12	22
15370	14	21	26		15370	3	4	7		15370	9	10	16
15470	18	21	31		15470	4	3	6		15470	9	8	21
15570	16	21	32		15570	4	4	10		15570	8	7	17
15670	18	24	32		15670	4	4	9		15670	7	12	18
15770	15	22	27		15770	4	3	9		15770	7	11	21
15870	17	20	30		15870	3	4	11		15870	7	11	19
15970	15	18	36		15970	1	3	8		15970	8	11	20
16070	14	23	30		16070	4	5	8		16070	6	10	18
16170	14	25	29		16170	3	4	7		16170	5	9	18
16270	19	19	31		16270	4	6	7		16270	7	14	21
16370	14	19	30		16370	2	3	8		16370	9	10	20
16470	16	17	26		16470	2	2	9		16470	7	9	15
16570	12	19	31		16570	3	4	6		16570	8	9	20
16670	14	23	33		16670	3	5	8		16670	7	9	16
16770	13	21	28		16770	3	3	8		16770	9	10	18
16870	15	23	29		16870	3	5	11		16870	7	8	13
16970	14	19	33		16970	3	3	9		16970	9	10	16
17070	14	18	29		17070	3	3	8		17070	8	9	18
17170	14	21	27		17170	4	3	8		17170	9	9	16
17270	16	19	28		17270	3	4	8		17270	6	10	16
17370	16	21	26		17370	2	3	9		17370	6	9	16
17470	15	21	30		17470	3	3	6		17470	6	7	16
17570	15	19	28		17570	3	4	8		17570	7	10	14
17670	12	20	34		17670	3	4	7		17670	7	7	16
17770	15	23	28		17770	3	4	6		17770	6	10	16
17870	15	18	24		17870	2	4	6		17870	7	8	13
17970	16	20	27		17970	2	5	10		17970	7	10	18
18070	12	19	27		18070	3	3	9		18070	6	8	18
18170	16	19	28		18170	3	3	8		18170	9	7	16
18270	13	19	27		18270	3	3	8		18270	6	9	14
18370	13	21	23		18370	3	3	9		18370	7	7	16
18470	14	19	26		18470	4	5	7		18470	6	8	16
18570	12	20	28		18570	2	4	8		18570	8	10	17
18670	14	20	23		18670	3	3	8		18670	7	8	14
18770	16	16	23		18770	2	4	7		18770	6	8	17
18870	12	16	24		18870	3	5	9		18870	7	8	18
18970	14	21	25		18970	3	4	6		18970	8	7	15
19070	12	17	23		19070	3	4	9		19070	7	7	14
19170	13	19	25		19170	3	5	8		19170	8	9	18
19270	13	16	24		19270	1	3	7		19270	8	10	14
19370	13	17	25		19370	4	3	7		19370	5	7	16
19470	12	20	21		19470	3	3	8		19470	6	8	12
19570	13	23	22		19570	4	5	8		19570	5	8	17
19670	13	17	26		19670	5	4	8		19670	6	8	14
19770	14	17	24		19770	3	2	9		19770	6	9	18
19870	13	17	22		19870	3	3	8		19870	6	6	15
19970	11	19	22		19970	2	4	7		19970	8	8	12
20070	12	14	21		20070	3	4	6		20070	7	9	14
20170	13	18	22		20170	3	3	8		20170	7	8	13
20270	13	20	21		20270	2	2	8		20270	6	9	16
20370	12	15	21		20370	3	4	6		20370	7	7	12
20470	13	18	20		20470	2	3	6		20470	8	8	19
20570	11	16	19		20570	2	4	8		20570	6	6	14
20670	13	18	19		20670	3	4	7		20670	8	6	15
20770	12	14	20		20770	3	3	5		20770	7	8	13
20870	13	15	20		20870	5	3	6		20870	6	9	14
20970	13	16	22		20970	1	4	5		20970	5	8	11
21070	11	16	17		21070	3	4	7		21070	6	11	13
21170	12	13	24		21170	3	4	6		21170	5	6	16
21270	13	16	17		21270	1	3	9		21270	5	6	12
21370	12	15	23		21370	3	3	6		21370	6	10	14
21470	8	18	23		21470	2	2	7		21470	5	7	13
21570	11	16	20		21570	3	4	7		21570	7	7	14
21670	12	17	19		21670	3	3	7		21670	6	7	14
21770	10	16	19		21770	3	2	7		21770	6	7	16
21870	11	15	19		21870	3	3	7		21870	5	6	12
21970	13	14	19		21970	3	3	7		21970	7	6	14
22070	10	14	20		22070	3	3	7		22070	6	8	16
22170	13	16	16		22170	3	2	8		22170	6	7	12
22270	12	15	19		22270	3	5	6		22270	6	9	11
22370	13	16	17		22370	3	2	7		22370	4	9	12
22470	10	15	17		22470	2	4	8		22470	7	6	13
22570	11	16	22		22570	3	3	8		22570	7	7	13
22670	10	14	21		22670	3	3	6		22670	7	7	12
22770	11	16	16		22770	3	3	6		22770	7	6	15
22870	10	12	20		22870	3	3	6		22870	8	6	12
22970	9	12	17		22970	4	3	8		22970	6	7	10
23070	10	18	21		23070	2	3	5		23070	6	6	12
23170	14	13	17		23170	3	4	9		23170	7	7	14
23270	11	16	18		23270	3	3	6		23270	6	7	12
23370	9	15	20		23370	3	4	9		23370	6	6	12
23470	10	15	17		23470	3	3	7		23470	5	6	12
23570	12	15	16		23570	2	2	7		23570	5	6	12
23670	11	16	17		23670	2	6	7		23670	5	7	13
23770	11	13	18		23770	4	2	8		23770	6	7	11
23870	11	14	19		23870	2	4	7		23870	5	6	11
23970	9	14	18		23970	2	6	5		23970	4	5	16
24070	13	14	14		24070	3	3	6		24070	6	7	13
24170	11	11	16		24170	4	2	6		24170	3	8	12
24270	11	14	18		24270	2	2	6		24270	6	4	11
24370	12	14	14		24370	3	2	6		24370	6	6	13
24470	11	12	16		24470	3	4	8		24470	4	6	13
24570	8	12	16		24570	3	4	7		24570	4	5	10
24670	11	12	16		24670	2	4	7		24670	7	6	10
24770	8	14	14		24770	3	3	7		24770	5	4	12
24870	12	16	16		24870	2	3	9		24870	5	6	11
24970	11	15	16		24970	3	3	4		24970	4	7	13
25070	10	15	15		25070	2	4	5		25070	5	9	12
25170	9	12	18		25170	2	2	5		25170	6	5	13
25270	9	15	16		25270	1	4	6		25270	7	5	14
25370	11	12	17		25370	3	3	8		25370	5	6	12
25470	9	14	16		25470	3	2	9		25470	6	7	11
25570	11	15	18		25570	1	3	8		25570	8	7	10
25670	8	11	16		25670	3	3	6		25670	5	5	9
25770	10	13	14		25770	3	3	5		25770	5	6	12
25870	8	11	16		25870	2	2	3		25870	6	6	11
25970	11	13	14		25970	2	2	6		25970	6	8	12
26070	12	12	16		26070	2	3	5		26070	6	5	11
26170	11	14	14		26170	2	2	5		26170	6	6	11
26270	11	11	19		26270	2	3	6		26270	5	7	10
26370	12	14	17		26370	3	2	6		26370	5	6	11
26470	10	13	19		26470	2	3	8		26470	6	4	13
26570	12	12	15		26570	2	3	6		26570	6	7	12
26670	10	13	18		26670	2	2	5		26670	6	6	8
26770	9	11	16		26770	2	3	4		26770	6	3	12
26870	10	9	14		26870	3	3	7		26870	5	5	12
26970	9	12	12		26970	3	3	6		26970	5	5	9
27070	8	11	13		27070	2	3	6		27070	4	7	10
27170	9	12	14		27170	2	3	4		27170	6	6	11
27270	11	11	13		27270	1	2	6		27270	6	5	15
27370	11	12	16		27370	2	2	6		27370	5	5	10
27470	11	12	15		27470	4	4	5		27470	5	7	9
27570	10	10	15		27570	3	2	7		27570	6	7	11
27670	13	13	14		27670	2	3	8		27670	6	5	11
27770	10	14	13		27770	2	3	6		27770	2	5	10
27870	10	12	15		27870	2	2	5		27870	4	6	10
27970	10	11	11		27970	3	4	8		27970	3	5	10
28070	11	8	14		28070	2	3	6		28070	4	6	12
28170	12	13	14		28170	2	3	5		28170	3	5	9
28270	7	15	13		28270	2	3	4		28270	5	5	12
28370	7	9	14		28370	3	3	6		28370	5	5	14
28470	9	9	14		28470	4	3	8		28470	5	5	11
28570	10	11	15		28570	2	3	4		28570	4	4	9
28670	10	10	12		28670	3	3	7		28670	4	6	10
28770	7	12	13		28770	3	4	6		28770	5	4	11
28870	9	12	10		28870	2	2	4		28870	5	5	8
28970	9	10	14		28970	3	2	4		28970	4	6	9
29070	11	11	13		29070	2	2	8		29070	5	4	11
29170	10	9	13		29170	2	3	6		29170	6	5	12
29270	8	9	10		29270	4	3	5		29270	6	5	12
29370	9	15	12		29370	3	3	5		29370	5	5	11
29470	10	11	13		29470	3	4	6		29470	4	6	10
29570	10	9	10		29570	3	2	6		29570	5	5	11
29670	9	13	12		29670	2	2	6		29670	4	6	9
29770	8	12	13		29770	2	3	7		29770	4	6	12
29870	9	10	11		29870	2	2	7		29870	4	6	8
29970	11	10	10		29970	2	2	5		29970	4	5	12
30070	10	13	13		30070	2	3	7		30070	3	5	11
30170	10	13	13		30170	3	3	6		30170	5	7	11
30270	8	9	15		30270	2	2	6		30270	5	5	8
30370	9	11	11		30370	4	3	6		30370	7	5	8
30470	8	11	11		30470	3	2	6		30470	5	4	11
30570	7	12	9		30570	1	3	5		30570	4	5	8
30670	8	10	12		30670	2	3	6		30670	4	6	8
30770	9	10	11		30770	2	2	5		30770	3	7	11
30870	9	9	9		30870	3	2	3		30870	4	4	11
30970	9	12	12		30970	2	3	6		30970	3	5	10
31070	11	10	12		31070	3	2	4		31070	5	5	10
31170	8	9	11		31170	1	2	6		31170	3	3	9
31270	9	12	12		31270	2	2	6		31270	6	4	11
31370	9	10	11		31370	3	3	4		31370	4	7	9
31470	9	10	10		31470	3	3	7		31470	4	5	9
31570	9	10	12		31570	2	3	5		31570	4	5	9
31670	8	9	14		31670	2	2	6		31670	8	4	10
31770	7	11	12		31770	3	3	4		31770	5	7	9
31870	10	8	8		31870	3	3	5		31870	3	4	11
31970	8	10	11		31970	1	2	5		31970	4	5	9
32070	10	10	12		32070	3	3	5		32070	4	5	8
32170	7	12	10		32170	2	3	7		32170	4	5	12
32270	8	10	10		32270	2	2	5		32270	4	4	9
32370	8	10	9		32370	2	2	6		32370	4	5	10
32470	8	8	9		32470	4	2	6		32470	4	5	8
32570	7	9	11		32570	3	2	5		32570	4	4	8
32670	8	10	12		32670	3	2	5		32670	3	5	7
32770	9	8	7		32770	2	2	5		32770	4	4	7
32870	7	10	10		32870	2	3	7		32870	5	5	11
32970	9	10	12		32970	2	4	6		32970	4	4	8
33070	9	12	11		33070	3	2	6		33070	3	6	7
33170	8	8	10		33170	3	3	4		33170	5	4	7
33270	10	9	10		33270	2	3	5		33270	5	4	8
33370	11	9	10		33370	3	2	5		33370	4	5	10
33470	6	9	9		33470	2	3	6		33470	4	4	10
33570	7	7	10		33570	2	3	6		33570	4	4	12
33670	9	9	10		33670	3	4	4		33670	5	4	10
33770	10	10	10		33770	3	3	7		33770	4	6	10
33870	10	8	10		33870	2	1	5		33870	4	6	9
33970	10	8	9		33970	1	2	4		33970	4	4	7
34070	5	9	9		34070	2	3	6		34070	5	3	6
34170	7	8	8		34170	2	4	5		34170	4	3	10
34270	8	12	11		34270	2	1	6		34270	3	4	7
34370	8	10	9		34370	3	2	5		34370	4	7	7
34470	8	9	9		34470	2	3	6		34470	4	4	7
34570	10	8	10		34570	2	3	4		34570	4	4	7
34670	9	8	11		34670	2	2	5		34670	3	4	9
34770	7	8	8		34770	2	2	5		34770	4	4	9
34870	10	11	10		34870	3	3	4		34870	5	4	11
34970	10	10	8		34970	3	2	5		34970	4	4	11
35070	10	9	9		35070	2	3	6		35070	5	5	10
35170	11	9	9		35170	2	3	6		35170	3	5	9
35270	7	7	9		35270	2	1	5		35270	5	5	9
35370	9	9	9		35370	1	3	6		35370	3	2	8
35470	9	9	7		35470	3	2	5		35470	5	3	7
35570	9	6	9		35570	2	2	5		35570	2	4	9
35670	7	8	11		35670	3	1	4		35670	3	4	10
35770	8	8	9		35770	2	3	4		35770	3	4	9
35870	6	5	9		35870	3	2	5		35870	4	5	6
35970	8	6	10		35970	1	2	5		35970	4	3	11
36070	9	6	10		36070	2	2	5		36070	4	4	8
36170	7	10	7		36170	1	2	6		36170	4	5	7
36270	10	7	10		36270	2	2	5		36270	3	4	7
36370	5	8	9		36370	2	2	6		36370	6	4	8
36470	9	6	10		36470	2	2	5		36470	3	3	8
36570	10	9	7		36570	2	1	4		36570	4	4	9
36670	7	7	7		36670	2	2	5		36670	5	5	8
36770	8	10	7		36770	1	2	5		36770	4	5	6
36870	7	8	8		36870	2	3	5		36870	5	5	10
36970	9	9	9		36970	2	2	5		36970	4	4	8
37070	5	8	7		37070	2	3	6		37070	4	4	8
37170	7	10	9		37170	3	2	5		37170	3	4	6
37270	8	8	9		37270	1	3	5		37270	4	4	10
37370	9	9	7		37370	2	2	5		37370	4	5	7
37470	8	9	10		37470	2	1	4		37470	5	4	7
37570	7	9	7		37570	1	2	5		37570	5	4	7
37670	9	6	8		37670	3	2	4		37670	3	3	7
37770	7	10	6		37770	2	1	6		37770	3	4	9
37870	8	9	8		37870	2	4	3		37870	4	4	9
37970	6	7	8		37970	3	2	6		37970	4	3	10
38070	7	8	8		38070	3	1	5		38070	4	3	9
38170	6	7	8		38170	3	2	3		38170	2	3	9
38270	7	9	8		38270	2	2	8		38270	4	5	8
38370	7	7	11		38370	3	3	7		38370	3	4	8
38470	8	7	9		38470	3	2	5		38470	5	3	9
38570	7	9	8		38570	3	2	3		38570	4	4	8
38670	9	7	7		38670	2	3	5		38670	3	4	8
38770	6	8	8		38770	3	2	4		38770	3	5	7
38870	6	9	6		38870	1	2	4		38870	4	4	6
38970	6	11	7		38970	2	2	6		38970	4	4	11
39070	8	7	9		39070	2	3	6		39070	4	4	8
39170	6	7	7		39170	1	2	4		39170	3	4	7
39270	8	7	8		39270	1	4	5		39270	6	4	6
39370	7	6	8		39370	3	2	7		39370	4	4	7
39470	6	7	6		39470	3	2	5		39470	4	3	9
39570	7	9	8		39570	1	2	6		39570	4	4	8
39670	8	8	6		39670	1	2	5		39670	4	5	6
39770	5	9	6		39770	1	3	4		39770	4	3	7
39870	6	8	8		39870	2	2	5		39870	4	3	8
39970	8	7	9		39970	1	1	5		39970	3	3	8
40070	8	7	9		40070	3	3	4		40070	3	3	8
40170	8	9	9		40170	2	2	5		40170	3	4	9
40270	8	7	8		40270	2	2	5		40270	3	3	6
40370	8	5	9		40370	2	2	5		40370	5	4	8
40470	6	6	6		40470	2	1	4		40470	3	5	8
40570	7	6	6		40570	2	3	4		40570	4	2	10
40670	6	9	6		40670	2	3	6		40670	3	3	11
40770	8	9	10		40770	2	2	3		40770	4	4	5
40870	6	8	5		40870	2	2	4		40870	4	4	7
40970	7	7	5		40970	2	3	4		40970	4	4	7
41070	6	9	8		41070	2	2	5		41070	4	4	6
41170	6	7	8		41170	1	2	4		41170	4	4	8
41270	8	6	8		41270	3	3	5		41270	3	5	8
41370	5	6	7		41370	2	2	5		41370	4	4	9
41470	7	8	7		41470	2	2	5		41470	4	3	9
41570	7	7	7		41570	1	2	4		41570	2	3	7
41670	5	7	8		41670	1	1	5		41670	5	2	8
41770	6	6	7		41770	2	2	5		41770	4	4	9
41870	6	7	6		41870	1	2	5		41870	4	2	7
41970	6	6	5		41970	2	2	4		41970	4	3	8
42070	6	9	6		42070	2	2	3		42070	4	3	7
42170	5	8	6		42170	2	2	4		42170	4	4	8
42270	8	6	7		42270	2	1	3		42270	4	2	7
42370	7	7	8		42370	3	1	5		42370	4	3	8
42470	7	7	5		42470	1	2	3		42470	4	4	7
42570	6	5	7		42570	1	2	5		42570	4	3	7
42670	6	8	7		42670	3	3	4		42670	3	3	7
42770	6	8	6		42770	2	2	3		42770	3	5	8
42870	6	7	7		42870	2	3	5		42870	4	3	9
42970	6	6	9		42970	1	2	4		42970	4	3	6
43070	7	9	8		43070	3	3	3		43070	4	3	9
43170	7	6	6		43170	3	3	5		43170	3	3	7
43270	5	6	4		43270	2	2	3		43270	4	3	6
43370	9	6	6		43370	3	1	4		43370	3	4	6
43470	6	4	5		43470	2	3	4		43470	2	3	6
43570	6	8	6		43570	2	2	7		43570	3	4	7
43670	4	5	8		43670	3	1	4		43670	4	3	7
43770	6	5	7		43770	2	2	4		43770	4	3	8
43870	5	7	7		43870	1	2	3		43870	4	3	7
43970	5	7	5		43970	1	2	5		43970	2	2	8
44070	7	7	7		44070	2	2	5		44070	5	2	7
44170	6	9	6		44170	2	2	5		44170	4	3	9
44270	8	7	7		44270	1	3	3		44270	3	4	7
44370	6	4	8		44370	2	2	5		44370	2	4	10
44470	7	5	6		44470	3	2	6		44470	3	4	9
44570	6	6	5		44570	2	2	7		44570	5	4	6
44670	6	5	6		44670	2	1	5		44670	3	2	6
44770	6	6	6		44770	3	2	4		44770	3	3	9
44870	6	7	6		44870	2	2	6		44870	4	3	6
44970	7	5	5		44970	2	2	3		44970	4	4	9
45070	5	6	6		45070	2	2	5		45070	4	2	7
45170	6	6	7		45170	2	2	5		45170	5	3	6
45270	6	6	5		45270	2	1	6		45270	3	2	7
45370	5	4	6		45370	2	3	4		45370	4	4	6
45470	6	5	7		45470	3	2	4		45470	3	3	6
45570	6	7	8		45570	2	2	7		45570	3	3	7
45670	4	5	7		45670	2	2	5		45670	3	4	6
45770	5	4	8		45770	3	2	4		45770	3	2	10
45870	5	5	7		45870	3	2	4		45870	3	3	9
45970	7	6	6		45970	2	2	5		45970	3	4	7
46070	7	7	6		46070	2	1	3		46070	2	4	7
46170	7	6	5		46170	1	2	3		46170	5	3	7
46270	6	6	6		46270	3	2	5		46270	3	3	9
46370	5	5	7		46370	1	2	5		46370	4	2	7
46470	6	5	6		46470	2	2	4		46470	3	2	6
46570	6	7	6		46570	3	2	3		46570	3	3	8
46670	6	6	7		46670	1	2	4		46670	4	3	5
46770	6	6	5		46770	3	2	6		46770	4	3	5
46870	7	7	6		46870	2	1	5		46870	3	4	9
46970	5	5	7		46970	3	2	5		46970	3	3	6
47070	7	5	5		47070	2	2	5		47070	4	2	9
47170	5	7	7		47170	1	1	5		47170	2	3	7
47270	6	7	5		47270	3	2	8		47270	3	4	6
47370	5	6	6		47370	2	2	4		47370	3	3	8
47470	5	6	4		47470	2	1	5		47470	2	2	6
47570	5	6	6		47570	2	2	4		47570	2	3	6
47670	5	5	5		47670	3	3	2		47670	4	3	7
47770	6	5	6		47770	1	3	5		47770	4	2	8
47870	5	4	6		47870	2	3	4		47870	3	3	7
47970	5	8	4		47970	3	2	5		47970	3	4	7
48070	6	5	5		48070	2	1	5		48070	3	2	6
48170	7	7	4		48170	2	1	3		48170	5	3	8
48270	6	4	5		48270	3	2	4		48270	3	3	6
48370	6	7	5		48370	2	1	5		48370	2	2	7
48470	5	6	7		48470	1	2	3		48470	3	2	7
48570	5	6	5		48570	1	2	4		48570	4	4	7
48670	6	5	6		48670	2	2	4		48670	3	3	8
48770	6	6	5		48770	2	4	5		48770	2	2	8
48870	6	6	5		48870	2	2	4		48870	4	3	6
48970	5	4	4		48970	3	3	5		48970	3	2	5
49070	6	6	6		49070	1	2	4		49070	2	2	8
49170	6	6	7		49170	3	1	5		49170	3	3	8
49270	6	5	8		49270	2	2	4		49270	3	3	6
49370	6	4	4		49370	2	2	6		49370	3	2	6
49470	8	6	7		49470	1	2	5		49470	3	3	7
49570	6	5	6		49570	2	1	4		49570	4	2	7
49670	6	5	6		49670	2	2	3		49670	3	2	7
49770	3	6	4		49770	2	2	6		49770	4	2	6
49870	7	6	7		49870	3	2	3		49870	4	2	5
49970	4	7	7		49970	3	2	3		49970	4	3	7
50070	3	7	6		50070	2	2	3		50070	3	3	8
50170	4	6	6		50170	1	2	6		50170	3	3	8
50270	5	6	6		50270	2	3	5		50270	3	2	7
50370	7	5	6		50370	1	2	6		50370	4	3	5
50470	6	4	4		50470	2	2	6		50470	3	3	5
50570	5	6	4		50570	2	2	5		50570	4	4	7
50670	4	3	5		50670	2	2	4		50670	2	1	7
50770	5	5	5		50770	3	3	5		50770	3	2	9
50870	5	4	5		50870	2	2	4		50870	2	3	10
50970	5	5	5		50970	1	2	4		50970	3	2	7
51070	5	4	5		51070	2	2	4		51070	3	2	7
51170	5	7	6		51170	3	3	6		51170	2	3	8
51270	6	5	5		51270	2	2	4		51270	2	3	7
51370	5	5	6		51370	2	2	4		51370	2	3	8
51470	6	4	5		51470	2	2	5		51470	1	3	7
51570	6	4	7		51570	2	2	5		51570	3	3	7
51670	7	4	5		51670	2	2	4		51670	3	3	6
51770	7	5	5		51770	2	2	4		51770	4	4	8
51870	6	6	4		51870	2	2	3		51870	3	2	6
51970	4	4	6		51970	2	2	4		51970	3	2	7
52070	5	5	5		52070	2	2	4		52070	4	2	5
52170	6	4	5		52170	3	2	5		52170	3	2	6
52270	6	4	4		52270	2	2	6		52270	4	2	6
52370	4	6	5		52370	3	2	5		52370	3	2	5
52470	5	5	5		52470	2	2	3		52470	3	3	5
52570	5	5	5		52570	2	3	5		52570	3	2	7
52670	7	7	4		52670	3	1	3		52670	2	3	7
52770	7	4	4		52770	1	2	5		52770	3	3	7
52870	6	3	4		52870	2	2	5		52870	3	2	6
52970	5	5	4		52970	1	3	4		52970	3	3	6
53070	4	3	3		53070	3	2	6		53070	2	3	8
53170	5	6	6		53170	1	2	6		53170	4	4	6
53270	6	6	4		53270	3	2	4		53270	2	4	7
53370	4	7	5		53370	2	2	5		53370	2	3	7
53470	5	4	6		53470	2	2	4		53470	3	2	7
53570	5	4	4		53570	1	1	4		53570	3	3	9
53670	8	5	3		53670	2	1	4		53670	2	3	6
53770	6	4	6		53770	1	1	4		53770	4	2	7
53870	6	6	6		53870	2	1	4		53870	2	3	7
53970	5	5	4		53970	2	2	3		53970	3	2	6
54070	5	6	3		54070	2	1	4		54070	4	3	5
54170	4	5	6		54170	2	2	4		54170	4	3	7
54270	5	5	5		54270	1	2	4		54270	2	3	7
54370	4	5	3		54370	2	1	6		54370	3	3	7
54470	5	4	5		54470	2	2	4		54470	4	3	7
54570	4	5	4		54570	2	3	4		54570	3	2	7
54670	5	4	5		54670	2	2	4		54670	3	3	6
54770	4	6	5		54770	2	2	5		54770	3	3	7
54870	6	4	3		54870	1	1	4		54870	4	2	7
54970	4	5	5		54970	2	2	6		54970	3	2	8
55070	5	4	4		55070	2	2	5		55070	3	2	7
55170	6	4	4		55170	2	2	3		55170	4	2	8
55270	5	6	5		55270	2	2	3		55270	1	2	6
55370	4	5	4		55370	3	1	4		55370	2	2	7
55470	5	4	5		55470	1	2	4		55470	3	3	6
55570	5	5	3		55570	1	1	4		55570	3	2	6
55670	5	4	5		55670	2	1	3		55670	2	2	7
55770	5	4	4		55770	1	2	5		55770	3	2	6
55870	5	4	5		55870	2	2	4		55870	2	3	5
55970	6	4	6		55970	1	2	4		55970	2	2	5
56070	8	6	6		56070	2	2	4		56070	4	2	5
56170	4	4	5		56170	2	1	6		56170	4	3	7
56270	8	5	4		56270	2	1	4		56270	2	2	7
56370	6	3	5		56370	1	2	5		56370	3	2	7
56470	5	5	3		56470	2	2	4		56470	2	4	8
56570	4	5	5		56570	1	2	4		56570	3	3	6
56670	5	4	3		56670	2	2	4		56670	3	2	5
56770	5	3	5		56770	2	2	4		56770	4	2	6
56870	6	4	4		56870	2	1	5		56870	2	2	7
56970	4	6	6		56970	2	2	5		56970	3	3	8
57070	5	5	4		57070	2	3	5		57070	4	2	7
57170	6	3	5		57170	2	1	4		57170	3	2	7
57270	3	4	5		57270	2	2	5		57270	2	3	5
57370	5	4	6		57370	3	1	4		57370	2	4	6
57470	5	5	6		57470	2	1	3		57470	2	2	7
57570	4	6	4		57570	2	3	5		57570	3	2	6
57670	5	4	4		57670	1	2	4		57670	2	3	7
57770	4	6	3		57770	2	2	4		57770	2	3	8
57870	7	5	5		57870	1	2	5		57870	2	2	6
57970	6	5	4		57970	1	2	5		57970	2	3	6
58070	4	5	5		58070	2	2	6		58070	3	3	7
58170	4	4	4		58170	2	2	4		58170	3	3	6
58270	3	4	4		58270	2	1	5		58270	2	1	7
58370	5	3	3		58370	2	1	2		58370	3	2	8
58470	5	4	4		58470	3	2	4		58470	3	2	5
58570	5	4	5		58570	2	1	5		58570	2	2	7
58670	5	4	6		58670	2	1	3		58670	3	3	7
58770	5	4	6		58770	2	2	5		58770	3	2	6
58870	6	4	4		58870	2	2	3		58870	2	3	7
58970	5	5	4		58970	2	2	3		58970	3	3	6
59070	5	4	4		59070	2	2	4		59070	2	2	6
59170	5	3	4		59170	2	2	4		59170	2	2	7
59270	4	4	5		59270	1	2	3		59270	2	3	7
59370	6	4	3		59370	1	2	4		59370	3	1	9
59470	4	4	3		59470	2	2	4		59470	2	4	7
59570	5	5	6		59570	2	2	4		59570	2	2	6
59670	4	3	3		59670	2	1	4		59670	2	2	5
59770	5	3	4		59770	2	2	5		59770	3	4	8
59870	5	5	5		59870	1	2	5		59870	3	2	8
59970	5	4	4		59970	1	2	3		59970	3	2	9
60070	5	2	4		60070	2	1	3		60070	3	2	5
60170	5	3	3		60170	2	1	4		60170	3	2	6
60270	4	4	5		60270	2	1	5		60270	1	2	8
60370	5	4	4		60370	1	2	4		60370	3	3	6
60470	5	4	3		60470	1	1	5		60470	3	2	5
60570	4	5	3		60570	2	2	5		60570	3	3	7
60670	5	3	4		60670	1	3	5		60670	3	2	6
60770	5	4	4		60770	1	1	3		60770	3	3	7
60870	3	3	3		60870	3	2	3		60870	2	2	5
60970	3	4	5		60970	2	3	4		60970	2	3	6
61070	5	2	4		61070	2	2	3		61070	2	3	5
61170	6	3	4		61170	2	1	5		61170	2	2	7
61270	5	3	4		61270	2	2	4		61270	3	2	5
61370	4	4	3		61370	2	1	2		61370	3	2	7
61470	3	4	5		61470	2	1	4		61470	3	2	6
61570	5	4	5		61570	2	2	3		61570	1	2	7
61670	3	3	4		61670	2	1	5		61670	3	3	5
61770	6	3	3		61770	2	2	3		61770	3	2	7
61870	5	4	2		61870	2	2	4		61870	3	2	6
61970	3	4	3		61970	2	1	3		61970	2	3	6
62070	4	3	3		62070	1	2	3		62070	3	2	7
62170	3	3	5		62170	2	2	5		62170	3	1	4
62270	4	4	5		62270	1	1	5		62270	3	3	7
62370	3	4	3		62370	2	2	5		62370	5	2	6
62470	5	3	2		62470	1	1	4		62470	2	1	7
62570	5	4	3		62570	2	2	5		62570	3	1	8
62670	4	5	4		62670	1	2	4		62670	3	2	6
62770	6	3	3		62770	2	1	5		62770	3	2	6
62870	3	4	3		62870	1	2	5		62870	3	2	7
62970	5	4	5		62970	3	2	3		62970	3	2	7
63070	7	3	3		63070	1	3	4		63070	4	2	8
63170	5	6	3		63170	2	2	5		63170	3	2	8
63270	4	4	3		63270	3	1	4		63270	2	2	7
63370	4	3	4		63370	1	2	5		63370	3	2	6
63470	5	3	4		63470	2	2	5		63470	2	3	8
63570	5	5	3		63570	1	1	3		63570	2	2	7
63670	5	4	4		63670	3	2	4		63670	3	2	7
63770	3	5	3		63770	2	2	5		63770	3	2	4
63870	4	4	4		63870	2	1	4		63870	3	2	9
63970	4	3	4		63970	2	1	3		63970	3	2	6
64070	4	3	4		64070	1	1	5		64070	2	2	8
64170	3	4	3		64170	2	2	4		64170	2	2	5
64270	5	6	3		64270	1	1	2		64270	3	3	6
64370	4	3	3		64370	1	3	4		64370	2	2	7
64470	4	4	3		64470	2	2	3		64470	3	2	6
64570	4	4	3		64570	2	2	5		64570	2	2	5
64670	4	4	5		64670	2	1	3		64670	2	3	8
64770	4	4	3		64770	1	2	4		64770	2	1	7
64870	4	4	4		64870	1	2	4		64870	2	2	5
64970	4	4	4		64970	2	3	6		64970	2	3	6
65070	5	4	4		65070	1	2	4		65070	3	2	6
65170	5	4	4		65170	1	1	5		65170	3	1	6
65270	3	4	5		65270	2	1	4		65270	3	2	5
65370	5	4	3		65370	2	1	3		65370	3	2	6
65470	4	4	3		65470	2	3	3		65470	3	3	6
65570	4	4	4		65570	1	1	3		65570	3	2	7
65670	3	4	3		65670	1	1	4		65670	2	2	6
65770	4	4	3		65770	2	1	5		65770	3	2	6
65870	5	4	3		65870	2	1	4		65870	2	2	8
65970	4	3	4		65970	2	2	5		65970	2	2	7
66070	5	5	3		66070	1	2	4		66070	2	2	8
66170	5	3	4		66170	2	1	5		66170	2	2	6
66270	4	3	3		66270	2	1	5		66270	2	2	8
66370	3	3	3		66370	2	1	4		66370	2	2	5
66470	4	2	3		66470	2	3	5		66470	3	3	6
66570	4	3	4		66570	2	2	3		66570	2	3	4
66670	3	3	5		66670	1	3	5		66670	2	2	8
66770	5	3	3		66770	2	2	4		66770	2	3	5
66870	3	4	4		66870	1	2	3		66870	2	2	7
66970	4	4	3		66970	2	2	4		66970	2	2	7
67070	4	5	5		67070	2	2	2		67070	2	2	6
67170	4	2	3		67170	2	1	4		67170	2	2	7
67270	6	4	3		67270	2	2	6		67270	2	2	5
67370	4	4	3		67370	1	2	4		67370	2	3	6
67470	3	3	3		67470	2	1	3		67470	3	2	6
67570	5	3	3		67570	2	2	4		67570	3	2	8
67670	3	3	4		67670	1	2	3		67670	2	3	8
67770	5	3	4		67770	3	1	4		67770	3	2	5
67870	4	2	3		67870	2	2	4		67870	2	2	7
67970	5	4	3		67970	1	1	3		67970	2	2	6
68070	5	3	3		68070	2	1	4		68070	3	2	5
68170	4	4	3		68170	2	1	3		68170	4	4	6
68270	4	4	3		68270	2	3	3		68270	2	2	7
68370	5	3	2		68370	2	2	4		68370	3	2	5
68470	6	4	3		68470	1	1	3		68470	3	1	6
68570	5	3	3		68570	2	1	3		68570	2	2	6
68670	4	5	3		68670	2	2	4		68670	2	3	6
68770	3	3	3		68770	1	1	4		68770	3	2	6
68870	6	3	4		68870	2	2	3		68870	2	3	6
68970	5	4	3		68970	2	1	4		68970	3	2	7
69070	5	4	3		69070	2	1	5		69070	2	3	6
69170	4	3	3		69170	3	2	5		69170	2	2	6
69270	4	4	4		69270	1	1	3		69270	3	2	5
69370	3	4	5		69370	2	2	4		69370	2	2	4
69470	3	4	4		69470	1	1	5		69470	2	3	6
69570	5	4	3		69570	2	1	4		69570	1	2	5
69670	4	3	4		69670	1	2	4		69670	2	2	6
69770	3	3	4		69770	2	2	4		69770	3	2	6
69870	5	3	3		69870	2	1	5		69870	2	2	6
69970	4	3	4		69970	1	1	3		69970	3	2	5
70070	4	3	4		70070	2	2	4		70070	2	2	6
70170	3	4	4		70170	2	1	3		70170	3	1	5
70270	3	2	3		70270	2	2	3		70270	2	2	5
70370	6	3	4		70370	2	1	4		70370	3	2	7
70470	4	3	3		70470	1	1	4		70470	2	1	4
70570	3	4	4		70570	2	2	4		70570	2	2	7
70670	5	3	3		70670	1	2	5		70670	3	1	4
70770	5	3	3		70770	2	2	3		70770	2	3	5
70870	4	3	3		70870	2	2	4		70870	2	2	5
70970	4	4	2		70970	2	1	4		70970	1	2	4
71070	4	3	3		71070	2	2	2		71070	1	1	6
71170	5	2	4		71170	1	2	4		71170	2	2	6
71270	6	4	3		71270	1	1	4		71270	2	3	7
71370	5	2	4		71370	2	1	5		71370	2	1	7
71470	5	2	3		71470	2	2	3		71470	2	2	4
71570	4	3	3		71570	2	2	4		71570	3	1	7
71670	5	3	3		71670	2	1	4		71670	3	1	7
71770	4	4	4		71770	2	1	4		71770	2	3	5
71870	4	3	4		71870	2	1	4		71870	2	2	6
71970	4	3	4		71970	2	1	5		71970	2	1	5
72070	4	3	4		72070	1	1	3		72070	3	3	6
72170	5	4	3		72170	1	1	3		72170	3	2	9
72270	3	3	2		72270	2	2	4		72270	4	3	5
72370	3	3	4		72370	2	1	4		72370	2	3	4
72470	3	1	3		72470	2	1	3		72470	3	2	6
72570	5	3	3		72570	1	2	5		72570	1	2	7
72670	5	4	3		72670	2	2	3		72670	2	1	3
72770	3	3	4		72770	2	3	4		72770	3	2	5
72870	4	3	4		72870	2	2	5		72870	2	2	7
72970	4	3	4		72970	2	1	3		72970	2	2	6
73070	5	2	3		73070	1	3	4		73070	3	1	6
73170	5	3	2		73170	1	1	5		73170	2	2	8
73270	6	3	4		73270	2	1	4		73270	3	2	6
73370	4	3	2		73370	2	2	4		73370	1	1	6
73470	5	3	3		73470	2	1	5		73470	2	2	6
73570	5	3	4		73570	2	2	4		73570	2	2	8
73670	5	3	3		73670	1	3	5		73670	2	2	7
73770	4	3	6		73770	2	2	4		73770	2	2	5
73870	4	2	3		73870	2	1	3		73870	3	2	6
73970	4	3	4		73970	1	1	4		73970	2	3	5
74070	4	2	4		74070	2	1	5		74070	2	2	5
74170	3	2	2		74170	2	1	4		74170	2	2	5
74270	4	3	4		74270	2	2	3		74270	3	2	3
74370	4	4	3		74370	2	2	4		74370	2	3	5
74470	2	2	3		74470	2	1	5		74470	3	2	4
74570	3	4	2		74570	2	2	4		74570	2	1	6
74670	2	3	4		74670	1	2	3		74670	3	2	6
74770	3	4	3		74770	2	1	3		74770	1	3	6
74870	5	2	3		74870	2	2	3		74870	2	2	5
74970	4	4	3		74970	1	1	3		74970	2	2	5
75070	4	4	3		75070	1	1	5		75070	1	2	6
75170	3	3	2		75170	2	1	4		75170	2	2	6
75270	3	3	3		75270	2	1	4		75270	3	2	4
75370	4	5	4		75370	2	2	3		75370	3	1	4
75470	4	4	3		75470	2	2	3		75470	2	2	5
75570	4	2	2		75570	2	2	3		75570	2	2	6
75670	4	3	3		75670	2	1	4		75670	2	2	5
75770	4	2	2		75770	1	2	3		75770	2	2	6
75870	3	2	3		75870	2	1	5		75870	2	1	4
75970	3	5	3		75970	2	2	5		75970	1	1	4
76070	4	3	2		76070	1	1	4		76070	1	3	7
76170	3	3	3		76170	1	2	3		76170	2	2	4
76270	3	3	2		76270	1	2	4		76270	2	2	4
76370	3	4	2		76370	2	1	3		76370	3	2	6
76470	4	3	3		76470	2	2	3		76470	2	2	6
76570	4	3	3		76570	2	2	4		76570	2	2	6
76670	3	3	3		76670	1	2	4		76670	3	2	5
76770	4	2	4		76770	2	2	4		76770	2	1	5
76870	3	3	2		76870	2	2	5		76870	3	1	4
76970	4	3	2		76970	3	1	4		76970	2	2	5
77070	3	3	3		77070	2	2	4		77070	2	2	7
77170	5	2	3		77170	1	1	3		77170	2	2	5
77270	4	3	2		77270	2	2	3		77270	2	2	4
77370	4	3	3		77370	1	2	3		77370	2	2	7
77470	3	3	2		77470	1	3	3		77470	2	2	7
77570	3	3	2		77570	3	2	3		77570	3	2	5
77670	5	2	2		77670	1	1	5		77670	2	1	5
77770	3	3	2		77770	3	1	3		77770	2	2	6
77870	3	3	3		77870	2	1	3		77870	1	3	6
77970	5	2	3		77970	2	2	4		77970	3	3	3
78070	4	2	2		78070	2	1	4		78070	2	2	5
78170	4	3	3		78170	1	2	5		78170	2	2	5
78270	5	2	5		78270	1	2	4		78270	3	2	8
78370	4	3	3		78370	2	1	3		78370	3	2	7
78470	2	3	3		78470	2	1	3		78470	2	2	6
78570	3	3	2		78570	1	2	4		78570	2	2	5
78670	3	2	3		78670	2	1	3		78670	2	1	4
78770	4	3	4		78770	2	2	5		78770	2	3	6
78870	4	2	2		78870	2	2	4		78870	3	3	7
78970	2	3	4		78970	2	1	4		78970	1	3	6
79070	4	3	4		79070	2	1	2		79070	3	2	6
79170	2	3	2		79170	1	1	4		79170	2	1	7
79270	4	3	4		79270	2	1	3		79270	2	1	6
79370	4	4	3		79370	2	1	4		79370	2	2	7
79470	4	4	3		79470	2	1	3		79470	2	2	5
79570	3	4	2		79570	1	1	4		79570	1	1	6
79670	3	2	2		79670	2	2	6		79670	2	3	6
79770	3	2	3		79770	1	1	4		79770	3	2	6
79870	3	3	3		79870	1	1	3		79870	2	2	6
79970	4	3	2		79970	1	2	3		79970	3	3	5
80070	3	3	2		80070	2	2	2		80070	2	2	6
80170	4	2	5		80170	1	1	4		80170	2	2	5
80270	3	2	4		80270	2	3	4		80270	2	2	5
80370	4	2	3		80370	1	2	3		80370	2	2	7
80470	6	2	3		80470	2	1	4		80470	3	1	5
80570	3	4	4		80570	2	2	5		80570	2	1	6
80670	4	3	2		80670	2	2	3		80670	2	2	6
80770	4	2	3		80770	1	1	4		80770	2	2	5
80870	3	2	4		80870	2	2	5		80870	1	2	6
80970	2	4	3		80970	1	2	4		80970	2	1	7
81070	3	2	2		81070	1	1	3		81070	3	2	5
81170	5	3	3		81170	2	2	4		81170	2	2	5
81270	4	4	3		81270	1	1	4		81270	1	2	4
81370	3	3	3		81370	1	2	5		81370	2	2	6
81470	4	1	2		81470	2	1	4		81470	2	2	6
81570	3	4	2		81570	2	2	3		81570	2	3	4
81670	3	3	2		81670	1	2	5		81670	2	2	4
81770	5	4	5		81770	1	2	3		81770	2	2	4
81870	3	4	2		81870	2	1	3		81870	2	2	6
81970	4	2	3		81970	1	2	3		81970	1	2	5
82070	3	3	4		82070	1	2	4		82070	2	2	5
82170	4	2	3		82170	2	2	4		82170	2	1	6
82270	2	3	3		82270	2	1	5		82270	2	1	5
82370	4	3	5		82370	2	2	4		82370	2	2	8
82470	3	3	3		82470	2	2	3		82470	2	1	5
82570	4	2	2		82570	2	2	3		82570	2	2	4
82670	3	4	2		82670	1	2	4		82670	2	2	5
82770	4	2	2		82770	1	2	3		82770	2	3	6
82870	4	3	3		82870	1	2	3		82870	3	2	5
82970	3	2	3		82970	1	1	5		82970	2	2	5
83070	3	2	3		83070	2	2	2		83070	3	1	5
83170	4	2	2		83170	2	1	4		83170	2	1	5
83270	4	3	2		83270	2	1	4		83270	2	3	5
83370	4	3	4		83370	1	1	4		83370	2	1	6
83470	2	2	3		83470	2	1	4		83470	1	1	4
83570	3	3	3		83570	1	2	3		83570	1	2	6
83670	3	2	2		83670	1	2	4		83670	2	2	3
83770	4	3	3		83770	2	3	4		83770	2	3	6
83870	3	3	4		83870	2	2	3		83870	1	2	6
83970	3	2	2		83970	2	2	4		83970	2	2	6
84070	3	2	3		84070	2	1	5		84070	1	2	6
84170	3	2	2		84170	1	2	3		84170	2	2	5
84270	4	3	2		84270	1	1	4		84270	2	1	5
84370	3	2	3		84370	1	1	4		84370	1	2	5
84470	4	3	4		84470	2	1	3		84470	2	2	7
84570	3	3	3		84570	2	1	5		84570	3	2	6
84670	4	3	3		84670	3	1	3		84670	2	2	5
84770	3	2	2		84770	2	2	5		84770	2	1	4
84870	4	2	3		84870	1	1	3		84870	2	2	6
84970	3	2	4		84970	2	1	4		84970	2	2	6
85070	4	2	3		85070	1	2	5		85070	2	2	4
85170	2	3	3		85170	1	2	3		85170	2	2	5
85270	2	2	3		85270	2	2	3		85270	3	1	6
85370	2	2	2		85370	2	1	5		85370	1	1	5
85470	4	2	4		85470	2	2	3		85470	2	1	6
85570	3	2	2		85570	2	2	5		85570	1	2	6
85670	3	2	4		85670	1	1	3		85670	3	2	5
85770	4	4	3		85770	2	2	4		85770	2	2	6
85870	4	1	4		85870	1	1	4		85870	2	3	5
85970	3	2	4		85970	1	2	5		85970	2	2	5
86070	5	3	3		86070	1	1	5		86070	2	3	4
86170	2	3	2		86170	1	2	5		86170	3	3	6
86270	4	5	2		86270	2	1	4		86270	2	2	6
86370	3	2	3		86370	2	1	5		86370	2	2	6
86470	3	3	2		86470	1	1	4		86470	3	2	5
86570	3	2	4		86570	1	2	3		86570	1	2	5
86670	2	3	2		86670	2	2	3		86670	2	2	4
86770	4	2	3		86770	2	1	3		86770	2	2	7
86870	4	2	3		86870	1	3	3		86870	2	1	5
86970	3	3	3		86970	2	1	3		86970	2	1	7
87070	3	2	3		87070	1	1	4		87070	3	2	6
87170	3	2	5		87170	2	1	3		87170	1	2	6
87270	3	2	5		87270	2	1	2		87270	2	1	5
87370	4	2	3		87370	1	2	4		87370	3	2	6
87470	4	2	3		87470	1	2	3		87470	1	2	5
87570	3	3	3		87570	1	1	3		87570	2	2	4
87670	3	2	3		87670	1	1	5		87670	3	2	5
87770	4	2	2		87770	1	1	3		87770	3	1	5
87870	5	2	3		87870	2	1	3		87870	2	1	4
87970	4	3	3		87970	2	1	3		87970	2	2	5
88070	3	2	2		88070	2	2	4		88070	2	2	4
88170	3	1	3		88170	1	1	4		88170	3	2	5
88270	1	2	2		88270	2	2	4		88270	2	3	7
88370	4	2	3		88370	1	2	4		88370	1	2	5
88470	2	1	3		88470	1	1	5		88470	2	1	5
88570	3	2	3		88570	2	1	5		88570	2	1	7
88670	3	2	2		88670	2	2	4		88670	1	1	8
88770	2	3	3		88770	2	1	2		88770	2	1	7
88870	3	2	2		88870	1	1	4		88870	2	2	5
88970	4	2	2		88970	2	1	4		88970	2	1	6
89070	5	3	3		89070	2	2	4		89070	2	3	2
89170	3	2	3		89170	1	1	5		89170	2	1	5
89270	3	3	2		89270	1	2	3		89270	2	3	6
89370	4	2	2		89370	1	2	3		89370	2	2	5
89470	3	2	2		89470	2	2	3		89470	2	1	4
89570	3	2	3		89570	1	2	3		89570	2	2	5
89670	3	3	3		89670	2	2	3		89670	2	2	6
89770	4	2	3		89770	2	3	4		89770	2	2	5
89870	3	3	3		89870	1	2	3		89870	1	2	7
89970	3	3	3		89970	1	2	3		89970	1	2	4
90070	3	2	3		90070	1	2	4		90070	1	2	3
90170	3	3	4		90170	2	1	4		90170	2	2	5
90270	4	2	3		90270	1	1	3		90270	2	2	7
90370	4	2	2		90370	1	2	3		90370	2	1	8
90470	4	3	3		90470	1	1	4		90470	2	2	4
90570	4	1	3		90570	2	1	4		90570	1	1	5
90670	4	2	3		90670	2	1	3		90670	2	2	4
90770	4	3	4		90770	1	1	5		90770	1	3	5
90870	3	3	3		90870	2	3	5		90870	2	2	5
90970	3	2	3		90970	1	2	4		90970	1	1	6
91070	2	3	4		91070	2	1	5		91070	3	1	4
91170	2	2	3		91170	2	2	2		91170	2	1	6
91270	2	3	4		91270	1	2	3		91270	2	2	6
91370	2	3	3		91370	1	1	2		91370	2	2	5
91470	2	2	2		91470	2	2	4		91470	1	2	5
91570	3	4	2		91570	1	1	3		91570	2	1	7
91670	2	2	3		91670	1	2	4		91670	2	2	6
91770	2	2	3		91770	2	2	4		91770	2	2	5
91870	3	2	3		91870	1	2	3		91870	1	2	5
91970	3	2	1		91970	2	1	3		91970	3	2	4
92070	3	2	3		92070	1	2	3		92070	2	2	6
92170	2	2	3		92170	2	2	5		92170	2	2	6
92270	3	3	3		92270	2	2	5		92270	2	1	5
92370	2	2	1		92370	3	2	3		92370	2	2	4
92470	3	2	2		92470	2	1	4		92470	2	3	4
92570	3	2	2		92570	1	1	4		92570	2	1	4
92670	3	3	4		92670	2	2	3		92670	2	2	4
92770	2	2	2		92770	2	1	4		92770	2	1	7
92870	4	2	2		92870	1	1	3		92870	2	2	4
92970	3	3	3		92970	2	1	4		92970	2	3	7
93070	3	2	3		93070	2	1	3		93070	3	1	5
93170	4	2	2		93170	2	2	3		93170	3	2	5
93270	2	3	2		93270	1	2	3		93270	1	1	4
93370	2	2	2		93370	1	1	2		93370	2	2	6
93470	2	3	2		93470	1	2	5		93470	2	2	7
93570	3	2	2		93570	1	2	4		93570	2	2	5
93670	4	2	1		93670	2	1	4		93670	2	1	5
93770	2	2	4		93770	2	1	5		93770	3	2	7
93870	3	2	3		93870	2	1	4		93870	2	2	5
93970	3	2	3		93970	2	2	4		93970	2	2	5
94070	3	3	3		94070	1	3	4		94070	2	2	4
94170	3	2	4		94170	2	1	3		94170	2	2	5
94270	3	2	2		94270	1	2	3		94270	3	2	5
94370	4	2	3		94370	3	2	4		94370	2	3	4
94470	3	2	3		94470	1	1	3		94470	2	1	5
94570	2	1	3		94570	2	1	4		94570	2	2	6
94670	2	3	3		94670	1	2	3		94670	2	2	5
94770	4	3	2		94770	2	1	4		94770	1	1	4
94870	4	3	1		94870	2	2	4		94870	2	2	5
94970	2	2	2		94970	2	1	4		94970	1	2	5
95070	4	2	3		95070	1	1	4		95070	2	1	5
95170	2	2	2		95170	2	1	4		95170	2	1	3
95270	3	2	2		95270	1	1	3		95270	1	2	5
95370	3	2	3		95370	2	1	6		95370	2	3	4
95470	3	2	3		95470	2	2	3		95470	2	2	5
95570	3	2	2		95570	2	1	3		95570	2	1	6
95670	3	2	3		95670	1	2	4		95670	1	2	6
95770	3	2	4		95770	1	1	4		95770	2	2	5
95870	3	2	4		95870	2	2	2		95870	2	2	5
95970	2	2	3		95970	2	2	4		95970	2	2	4
96070	3	1	3		96070	2	1	4		96070	2	1	7
96170	3	3	3		96170	2	2	3		96170	2	3	4
96270	3	3	2		96270	2	2	4		96270	1	1	4
96370	4	2	3		96370	1	2	3		96370	1	2	6
96470	2	2	2		96470	2	2	3		96470	2	2	5
96570	3	2	2		96570	2	2	5		96570	2	1	4
96670	2	1	3		96670	1	1	4		96670	2	2	4
96770	3	2	4		96770	2	2	3		96770	3	1	4
96870	4	3	3		96870	2	1	3		96870	2	1	5
96970	3	2	3		96970	2	2	2		96970	2	2	5
97070	3	1	2		97070	2	2	3		97070	2	2	4
97170	3	2	4		97170	2	1	3		97170	1	1	6
97270	3	3	3		97270	1	1	4		97270	2	2	7
97370	2	2	3		97370	1	1	4		97370	1	1	5
97470	2	2	3		97470	2	1	4		97470	2	2	5
97570	2	3	1		97570	1	1	4		97570	1	2	4
97670	2	1	4		97670	1	1	5		97670	2	1	6
97770	2	2	2		97770	2	1	4		97770	2	2	5
97870	3	2	3		97870	2	2	4		97870	3	2	5
97970	3	1	4		97970	1	1	4		97970	2	2	6
98070	4	1	2		98070	1	1	4		98070	3	2	5
98170	3	2	3		98170	2	1	5		98170	2	1	3
98270	3	3	3		98270	2	2	3		98270	2	2	5
98370	4	3	3		98370	2	2	4		98370	1	3	4
98470	3	2	3		98470	2	2	3		98470	2	2	4
98570	3	2	3		98570	1	2	2		98570	2	2	4
98670	3	2	4		98670	2	2	4		98670	1	2	4
98770	2	2	3		98770	1	2	4		98770	2	2	5
98870	3	1	2		98870	2	1	3		98870	1	1	6
98970	3	2	2		98970	1	1	3		98970	2	2	4
99070	2	2	3		99070	1	2	4		99070	2	2	4
99170	2	2	3		99170	2	1	3		99170	2	2	5
99270	2	1	2		99270	2	2	3		99270	1	2	5
99370	2	2	2		99370	2	2	3		99370	2	1	4
99470	2	2	3		99470	2	2	4		99470	1	2	4
99570	3	2	2		99570	1	2	4		99570	2	3	4
99670	4	3	3		99670	2	2	3		99670	2	1	6
99770	2	2	2		99770	1	1	4		99770	2	2	5
99870	2	2	1		99870	1	2	4		99870	2	2	5
99970	3	1	2		99970	1	2	4		99970	1	3	5
100070	4	2	3		100070	1	2	4		100070	2	2	6
100170	3	2	2		100170	1	1	4		100170	1	2	4
100270	2	2	3		100270	2	2	4		100270	2	1	4
100370	3	2	3		100370	3	2	4		100370	2	2	3
100470	3	2	2		100470	2	1	3		100470	2	2	5
100570	3	1	2		100570	2	2	4		100570	1	3	4
100670	3	3	3		100670	1	2	3		100670	3	1	5
100770	3	2	3		100770	1	1	4		100770	1	2	4
100870	3	3	2		100870	1	1	4		100870	2	2	5
100970	2	2	4		100970	1	2	3		100970	3	1	5
101070	3	1	2		101070	2	1	4		101070	1	2	6
101170	3	2	3		101170	2	2	3		101170	2	2	5
101270	4	2	3		101270	1	1	3		101270	2	1	5
101370	2	2	2		101370	1	2	3		101370	2	1	4
101470	4	1	3		101470	2	2	3		101470	2	1	5
101570	3	2	3		101570	2	2	3		101570	2	2	5
101670	3	2	2		101670	2	2	6		101670	2	3	6
101770	1	2	2		101770	1	3	4		101770	1	2	6
101870	3	2	3		101870	2	1	3		101870	2	1	4
101970	3	2	3		101970	2	1	3		101970	2	2	6
102070	2	2	3		102070	1	2	3		102070	1	2	5
102170	3	3	3		102170	2	2	3		102170	2	1	7
102270	2	1	2		102270	1	2	3		102270	1	1	4
102370	3	2	3		102370	2	1	3		102370	2	1	5
102470	3	3	2		102470	2	2	3		102470	2	1	5
102570	3	1	2		102570	2	2	2		102570	2	2	4
102670	3	2	3		102670	1	1	3		102670	1	2	5
102770	4	1	3		102770	2	1	3		102770	2	2	5
102870	3	2	3		102870	2	1	3		102870	2	2	6
102970	2	3	2		102970	1	1	4		102970	1	2	4
103070	2	2	2		103070	2	2	4		103070	2	2	5
103170	3	3	3		103170	2	2	4		103170	1	2	4
103270	2	2	3		103270	2	1	3		103270	2	2	4
103370	3	3	3		103370	1	2	4		103370	1	1	7
103470	4	2	3		103470	2	3	4		103470	1	2	4
103570	1	2	3		103570	1	1	4		103570	2	1	4
103670	2	2	3		103670	1	2	4		103670	2	2	3
103770	4	3	3		103770	1	2	4		103770	1	1	3
103870	3	2	2		103870	1	1	3		103870	1	2	5
103970	3	2	2		103970	2	1	3		103970	2	3	5
104070	3	1	2		104070	2	2	4		104070	2	1	5
104170	4	3	3		104170	1	1	3		104170	2	1	5
104270	3	2	3		104270	1	2	3		104270	2	2	5
104370	2	1	3		104370	1	2	2		104370	2	1	4
104470	2	2	2		104470	1	2	4		104470	2	2	7
104570	2	2	2		104570	2	2	3		104570	2	1	4
104670	3	2	2		104670	1	1	3		104670	1	2	7
104770	3	2	3		104770	2	1	3		104770	2	1	5
104870	3	1	2		104870	1	2	3		104870	2	2	4
104970	2	2	3		104970	1	2	5		104970	2	2	5
105070	3	2	4		105070	1	1	3		105070	2	2	5
105170	2	3	3		105170	1	1	4		105170	2	1	5
105270	3	2	3		105270	1	1	2		105270	2	1	5
105370	3	2	2		105370	2	1	3		105370	2	1	5
105470	2	1	2		105470	1	3	3		105470	2	2	5
105570	3	3	2		105570	2	2	2		105570	1	1	5
105670	2	2	4		105670	1	2	4		105670	2	1	5
105770	5	3	3		105770	1	2	4		105770	2	1	3
105870	2	2	1		105870	2	2	3		105870	2	3	6
105970	3	3	3		105970	2	3	4		105970	2	2	4
106070	3	2	3		106070	1	2	5		106070	1	2	5
106170	3	1	3		106170	1	1	2		106170	2	1	5
106270	3	2	3		106270	2	2	4		106270	1	1	6
106370	3	2	1		106370	2	2	4		106370	3	2	4
106470	2	2	2		106470	1	1	4		106470	2	2	3
106570	2	2	4		106570	2	1	3		106570	1	2	5
106670	2	2	3		106670	2	1	3		106670	2	1	3
106770	3	2	2		106770	2	2	2		106770	1	1	5
106870	3	2	2		106870	2	2	3		106870	3	2	4
106970	2	2	3		106970	1	3	3		106970	2	2	6
107070	2	1	3		107070	2	2	3		107070	2	1	5
107170	3	3	2		107170	1	2	4		107170	1	2	5
107270	2	3	3		107270	1	2	3		107270	1	1	6
107370	2	2	2		107370	2	2	3		107370	1	2	4
107470	2	1	4		107470	2	1	3		107470	2	2	6
107570	2	2	3		107570	1	1	4		107570	2	2	5
107670	3	2	2		107670	1	2	3		107670	2	2	5
107770	3	2	3		107770	1	2	4		107770	1	1	6
107870	2	1	3		107870	2	2	3		107870	1	2	4
107970	3	2	2		107970	2	2	3		107970	2	1	4
108070	4	2	2		108070	2	2	3		108070	1	2	4
108170	3	2	2		108170	1	2	3		108170	1	1	4
108270	3	2	3		108270	2	1	3		108270	2	1	6
108370	2	3	3		108370	1	1	2		108370	2	3	5
108470	3	1	2		108470	1	1	3		108470	1	2	5
108570	4	1	2		108570	1	1	2		108570	1	2	4
108670	2	1	2		108670	2	1	4		108670	1	1	6
108770	2	2	3		108770	1	1	4		108770	2	2	5
108870	2	2	3		108870	1	1	4		108870	1	2	4
108970	2	2	2		108970	2	2	3		108970	1	2	4
109070	3	2	3		109070	3	1	4		109070	3	2	6
109170	4	2	2		109170	2	1	2		109170	2	2	4
109270	3	2	2		109270	1	3	3		109270	1	1	5
109370	3	2	2		109370	3	1	5		109370	1	2	4
109470	3	1	2		109470	2	2	3		109470	2	1	6
109570	3	2	1		109570	2	2	4		109570	1	2	6
109670	2	1	2		109670	2	1	3		109670	1	2	5
109770	4	2	3		109770	2	2	4		109770	2	2	4
109870	4	3	2		109870	2	2	3		109870	1	2	5
109970	2	1	3		109970	2	2	3		109970	2	1	4
110070	2	3	2		110070	1	1	5		110070	2	1	4
110170	3	1	2		110170	1	1	3		110170	2	2	3
110270	2	2	3		110270	1	2	3		110270	1	2	5
110370	1	2	3		110370	1	1	4		110370	1	2	5
110470	2	2	2		110470	1	2	3		110470	2	2	4
110570	2	1	3		110570	1	2	3		110570	1	2	5
110670	2	2	3		110670	1	2	3		110670	2	2	5
110770	2	1	2		110770	2	1	2		110770	1	1	4
110870	2	2	3		110870	2	2	3		110870	3	2	5
110970	3	1	2		110970	2	2	4		110970	2	2	6
111070	2	2	2		111070	1	2	4		111070	1	2	4
111170	3	2	2		111170	2	1	3		111170	2	2	5
111270	3	2	3		111270	1	1	2		111270	1	3	5
111370	3	1	3		111370	1	1	4		111370	3	1	5
111470	2	2	3		111470	2	1	3		111470	1	2	3
111570	3	1	3		111570	2	1	4		111570	3	3	4
111670	3	2	2		111670	1	1	2		111670	2	2	6
111770	2	2	2		111770	2	1	3		111770	2	2	5
111870	2	2	3		111870	1	1	5		111870	2	1	5
111970	2	2	3		111970	1	2	4		111970	2	1	3
112070	3	3	3		112070	1	2	4		112070	2	2	4
112170	2	2	2		112170	1	1	3		112170	2	2	3
112270	2	2	2		112270	1	1	4		112270	1	3	5
112370	2	2	2		112370	2	1	3		112370	2	2	4
112470	3	1	3		112470	2	3	3		112470	1	2	5
112570	3	2	3		112570	1	1	3		112570	1	2	4
112670	1	2	2		112670	2	2	3		112670	1	2	3
112770	2	2	2		112770	1	2	3		112770	2	2	4
112870	2	1	4		112870	1	1	3		112870	2	2	5
112970	3	2	1		112970	1	1	5		112970	2	1	4
113070	3	2	2		113070	1	2	4		113070	1	1	4
113170	3	1	3		113170	2	1	3		113170	1	1	5
113270	2	2	4		113270	1	2	3		113270	1	1	3
113370	2	2	2		113370	1	2	3		113370	2	2	3
113470	2	2	3		113470	1	1	4		113470	1	2	5
113570	3	2	2		113570	2	1	2		113570	2	1	3
113670	3	2	2		113670	2	1	3		113670	2	2	4
113770	5	3	4		113770	3	1	3		113770	2	2	4
113870	3	2	1		113870	2	2	4		113870	1	2	4
113970	2	2	3		113970	3	2	4		113970	2	1	5
114070	3	1	3		114070	1	1	4		114070	1	2	3
114170	3	2	3		114170	2	1	4		114170	2	1	5
114270	2	1	4		114270	1	1	5		114270	2	1	4
114370	3	2	3		114370	1	2	3		114370	2	1	4
114470	2	2	2		114470	1	1	2		114470	2	2	4
114570	3	2	2		114570	1	2	4		114570	1	2	6
114670	3	1	2		114670	2	2	2		114670	2	2	4
114770	3	1	2		114770	1	1	3		114770	1	2	5
114870	3	1	3		114870	1	1	3		114870	3	2	4
114970	3	3	2		114970	2	1	3		114970	2	2	4
115070	3	2	2		115070	2	1	3		115070	3	2	5
115170	2	2	2		115170	2	2	3		115170	1	2	4
115270	3	2	3		115270	1	2	4		115270	1	2	3
115370	3	2	3		115370	1	1	3		115370	3	1	3
115470	3	1	3		115470	1	2	3		115470	1	2	4
115570	3	2	2		115570	1	2	3		115570	2	1	4
115670	4	2	3		115670	1	1	2		115670	1	2	4
115770	2	2	2		115770	2	2	4		115770	2	1	4
115870	3	1	2		115870	1	2	4		115870	1	2	6
115970	3	2	2		115970	2	1	4		115970	3	1	3
116070	3	3	3		116070	2	2	3		116070	3	2	4
116170	2	2	3		116170	2	2	2		116170	2	1	5
116270	3	2	3		116270	2	1	4		116270	2	2	5
116370	3	2	2		116370	1	3	4		116370	2	2	4
116470	2	2	2		116470	1	1	3		116470	2	2	4
116570	3	2	1		116570	1	2	4		116570	1	2	4
116670	2	2	3		116670	1	1	2		116670	2	2	3
116770	3	2	3		116770	1	2	2		116770	1	1	4
116870	3	2	3		116870	1	1	4		116870	2	1	6
116970	1	2	3		116970	2	2	3		116970	2	1	4
117070	2	2	2		117070	1	2	3		117070	1	2	6
117170	3	3	3		117170	1	1	5		117170	2	2	4
117270	3	2	3		117270	2	2	2		117270	1	2	4
117370	2	2	2		117370	1	1	3		117370	1	1	6
117470	2	1	3		117470	2	2	3		117470	1	2	4
117570	3	2	2		117570	1	2	3		117570	2	2	5
117670	2	2	2		117670	1	1	4		117670	1	2	4
117770	2	1	2		117770	1	1	2		117770	1	2	3
117870	3	1	2		117870	2	1	3		117870	1	1	3
117970	4	2	2		117970	1	1	3		117970	2	2	3
118070	4	2	2		118070	2	2	5		118070	1	1	4
118170	3	3	3		118170	2	2	4		118170	2	1	4
118270	1	1	2		118270	2	2	4		118270	1	1	4
118370	2	1	3		118370	1	2	4		118370	1	1	4
118470	2	3	2		118470	1	1	3		118470	2	2	4
118570	2	1	2		118570	2	1	3		118570	2	2	5
118670	3	1	3		118670	1	1	4		118670	2	2	4
118770	2	2	1		118770	2	2	4		118770	1	2	7
118870	2	2	3		118870	2	1	4		118870	2	2	4
118970	2	1	3		118970	2	2	2		118970	1	2	5
119070	3	2	1		119070	1	1	3		119070	1	3	3
119170	1	2	2		119170	2	1	4		119170	2	2	3
119270	2	1	2		119270	2	1	4		119270	2	2	3
119370	2	2	4		119370	1	1	2		119370	1	2	4
119470	3	2	1		119470	1	2	2		119470	2	2	3
119570	3	1	2		119570	1	1	4		119570	1	1	5
119670	2	1	2		119670	1	2	3		119670	2	2	4
119770	2	1	3		119770	1	1	2		119770	1	2	3
119870	3	1	2		119870	1	1	3		119870	2	2	6
119970	2	2	2		119970	1	1	3		119970	2	3	3
120070	3	1	2		120070	2	1	2		120070	1	1	5
120170	3	2	2		120170	1	1	3		120170	1	2	4
120270	1	2	2		120270	2	1	3		120270	1	1	5
120370	2	2	2		120370	1	1	5		120370	1	2	4
120470	3	2	3		120470	1	1	3		120470	2	2	5
120570	4	2	2		120570	2	1	5		120570	2	2	3
120670	3	2	2		120670	1	2	4		120670	1	2	3
120770	2	1	3		120770	2	2	4		120770	3	1	5
120870	4	3	3		120870	1	2	3		120870	2	2	5
120970	4	2	3		120970	1	2	3		120970	2	3	4
121070	3	2	2		121070	1	2	3		121070	1	1	5
121170	2	1	2		121170	2	2	4		121170	1	2	4
121270	2	3	2		121270	1	1	3		121270	1	2	5
121370	2	2	1		121370	1	2	4		121370	1	1	4
121470	2	2	2		121470	2	1	3		121470	2	3	5
121570	3	1	3		121570	2	2	4		121570	1	1	3
121670	1	2	4		121670	2	1	4		121670	2	3	4
121770	3	1	2		121770	1	1	4		121770	1	1	5
121870	2	2	2		121870	1	2	4		121870	2	1	5
121970	2	2	2		121970	1	1	2		121970	2	2	4
122070	2	2	2		122070	1	1	2		122070	1	1	3
122170	2	2	4		122170	2	1	3		122170	1	2	4
122270	2	1	3		122270	2	1	3		122270	1	1	4
122370	2	2	3		122370	1	2	3		122370	2	1	5
122470	2	2	3		122470	1	1	4		122470	2	2	5
122570	2	2	3		122570	2	1	2		122570	1	2	3
122670	3	3	3		122670	2	2	3		122670	1	1	3
122770	3	3	2		122770	1	1	2		122770	1	2	3
122870	2	2	3		122870	2	2	2		122870	1	2	4
122970	2	3	2		122970	1	1	3		122970	3	1	4
123070	3	1	2		123070	1	1	4		123070	2	1	4
123170	2	1	3		123170	2	2	3		123170	2	1	5
123270	2	1	2		123270	2	1	4		123270	1	1	5
123370	2	2	2		123370	2	1	3		123370	1	1	3
123470	2	1	3		123470	1	1	3		123470	2	1	4
123570	2	1	2		123570	1	2	5		123570	2	3	4
123670	2	1	2		123670	1	2	3		123670	2	2	3
123770	1	2	1		123770	1	2	3		123770	1	2	5
123870	4	2	3		123870	2	2	3		123870	1	2	6
123970	2	2	1		123970	2	1	3		123970	2	1	4
124070	2	2	2		124070	1	1	3		124070	2	1	5
124170	2	2	3		124170	2	2	3		124170	1	2	3
124270	2	2	2		124270	1	1	3		124270	1	1	4
124370	2	1	3		124370	1	2	3		124370	2	2	5
124470	4	1	3		124470	2	1	2		124470	1	1	6
124570	3	1	3		124570	2	1	3		124570	2	2	4
124670	3	1	2		124670	2	2	2		124670	2	2	6
124770	2	2	2		124770	1	2	3		124770	2	1	2
124870	3	2	3		124870	2	2	2		124870	1	2	5
124970	2	2	2		124970	1	1	4		124970	2	2	6
125070	2	1	2		125070	1	2	3		125070	1	2	5
125170	2	1	2		125170	1	2	2		125170	2	2	3
125270	2	2	2		125270	1	1	2		125270	2	2	4
125370	1	2	3		125370	1	1	5		125370	2	1	4
125470	2	2	2		125470	2	2	3		125470	1	1	3
125570	3	2	2		125570	2	1	3		125570	1	2	5
125670	2	2	2		125670	1	1	4		125670	1	2	5
125770	2	1	3		125770	2	1	4		125770	2	1	4
125870	2	1	2		125870	1	2	4		125870	1	2	6
125970	2	1	2		125970	2	1	2		125970	2	2	4
126070	2	1	2		126070	2	2	5		126070	2	2	4
126170	2	2	3		126170	1	1	3		126170	1	2	6
126270	1	1	2		126270	1	2	3		126270	2	1	4
126370	2	1	2		126370	2	2	2		126370	2	1	4
126470	2	3	4		126470	1	2	3		126470	3	1	5
126570	2	2	1		126570	1	1	3		126570	2	2	3
126670	2	2	2		126670	1	1	3		126670	3	2	3
126770	3	4	2		126770	2	2	2		126770	1	2	4
126870	2	2	3		126870	2	1	4		126870	1	2	5
126970	2	1	2		126970	1	2	4		126970	3	2	5
127070	1	2	2		127070	2	2	2		127070	1	1	5
127170	2	2	3		127170	1	2	2		127170	2	2	4
127270	2	2	1		127270	2	1	3		127270	1	2	4
127370	2	3	2		127370	2	1	4		127370	2	1	4
127470	2	1	2		127470	1	1	3		127470	2	2	4
127570	2	2	3		127570	1	1	2		127570	2	2	4
127670	3	1	2		127670	1	2	3		127670	1	1	4
127770	2	3	3		127770	2	1	3		127770	2	2	4
127870	3	1	2		127870	2	1	3		127870	1	2	5
127970	2	2	2		127970	1	2	3		127970	2	1	4
128070	2	1	2		128070	1	1	2		128070	2	1	4
128170	3	2	3		128170	1	2	3		128170	3	1	4
128270	2	2	2		128270	1	2	3		128270	3	2	5
128370	2	2	3		128370	2	1	3		128370	2	2	4
128470	2	1	2		128470	2	2	4		128470	1	2	5
128570	2	1	3		128570	2	2	2		128570	1	2	4
128670	2	2	2		128670	2	2	2		128670	2	1	3
128770	2	2	2		128770	2	1	3		128770	1	2	4
128870	1	2	2		128870	2	2	2		128870	2	1	3
128970	3	1	2		128970	2	1	3		128970	2	2	3
129070	2	1	2		129070	1	2	4		129070	2	2	5
129170	2	1	2		129170	1	2	3		129170	2	1	3
129270	2	1	3		129270	2	2	3		129270	2	1	4
129370	3	2	2		129370	1	1	3		129370	3	2	4
129470	2	2	2		129470	1	1	2		129470	2	1	5
129570	2	2	4		129570	1	1	3		129570	2	2	5
129670	2	1	2		129670	1	1	3		129670	1	2	5
129770	2	3	2		129770	1	1	4		129770	1	2	3
129870	2	1	3		129870	3	1	3		129870	1	1	3
129970	2	2	2		129970	2	1	4		129970	1	1	4
130070	2	1	3		130070	3	1	3		130070	1	1	3
130170	2	1	3		130170	1	2	4		130170	1	2	4
130270	2	2	2		130270	1	2	4		130270	2	3	6
130370	2	1	3		130370	2	2	3		130370	1	3	4
130470	1	2	3		130470	1	2	3		130470	3	2	4
130570	2	2	2		130570	1	1	4		130570	2	2	5
130670	3	2	2		130670	1	1	3		130670	1	2	4
130770	2	2	3		130770	1	1	4		130770	2	1	4
130870	2	2	3		130870	2	1	2		130870	1	1	5
130970	2	2	2		130970	2	1	3		130970	2	2	4
131070	2	1	3		131070	2	2	4		131070	2	2	4
131170	2	2	2		131170	1	1	2		131170	1	1	4
131270	3	2	2		131270	1	2	2		131270	1	2	5
131370	2	2	2		131370	1	3	3		131370	2	1	4
131470	2	2	2		131470	1	1	3		131470	1	1	4
131570	2	1	3		131570	2	1	3		131570	1	2	5
131670	1	2	3		131670	1	1	2		131670	2	1	4
131770	3	1	2		131770	1	1	2		131770	2	2	3
131870	3	1	3		131870	1	2	4		131870	2	1	3
131970	3	1	1		131970	2	1	3		131970	2	1	4
132070	2	2	2		132070	1	1	2		132070	2	1	3
132170	1	3	3		132170	1	1	4		132170	2	1	4
132270	2	2	2		132270	1	2	3		132270	1	1	3
132370	2	2	3		132370	2	2	3		132370	2	2	4
132470	2	1	2		132470	2	1	4		132470	2	2	3
132570	2	1	2		132570	1	1	3		132570	2	2	4
132670	2	1	3		132670	1	1	4		132670	1	2	4
132770	1	2	2		132770	2	1	2		132770	2	1	3
132870	2	2	2		132870	1	2	3		132870	2	1	3
132970	2	1	2		132970	2	1	2		132970	1	1	4
133070	2	1	2		133070	1	2	4		133070	1	2	7
133170	3	2	2		133170	2	1	3		133170	2	2	5
133270	3	2	2		133270	2	2	3		133270	1	1	5
133370	2	1	2		133370	1	2	4		133370	1	2	4
133470	3	2	3		133470	2	2	3		133470	1	2	4
133570	4	2	2		133570	2	2	3		133570	1	2	5
133670	2	1	3		133670	2	1	3		133670	2	1	4
133770	2	1	3		133770	1	2	4		133770	1	1	4
133870	2	1	3		133870	1	2	3		133870	1	1	4
133970	1	2	3		133970	2	1	3		133970	2	2	3
134070	3	2	2		134070	2	1	5		134070	2	2	5
134170	2	1	2		134170	1	2	3		134170	1	2	5
134270	3	1	2		134270	2	1	2		134270	3	2	4
134370	2	2	2		134370	1	1	4		134370	1	2	4
134470	2	1	4		134470	2	2	4		134470	1	2	3
134570	3	1	2		134570	1	2	2		134570	2	1	5
134670	2	3	3		134670	2	2	3		134670	2	1	5
134770	3	2	2		134770	1	1	3		134770	1	1	4
134870	2	1	2		134870	1	1	4		134870	1	2	4
134970	2	2	2		134970	1	3	3		134970	2	1	4
135070	2	2	2		135070	2	1	2		135070	1	2	4
135170	3	2	3		135170	1	1	3		135170	1	1	4
135270	2	1	2		135270	1	1	4		135270	1	1	3
135370	2	2	2		135370	1	1	3		135370	1	2	4
135470	2	1	1		135470	1	2	3		135470	1	1	6
135570	3	1	2		135570	2	1	4		135570	2	2	4
135670	3	1	1		135670	1	1	3		135670	1	2	4
135770	3	2	2		135770	2	1	4		135770	1	2	2
135870	2	2	2		135870	1	1	3		135870	3	1	3
135970	2	1	2		135970	1	2	3		135970	2	3	5
136070	3	2	2		136070	1	1	2		136070	2	2	4
136170	2	1	2		136170	1	2	3		136170	2	2	3
136270	2	1	2		136270	2	2	3		136270	2	2	4
136370	3	1	3		136370	1	2	3		136370	1	1	5
136470	2	2	2		136470	1	1	2		136470	2	1	4
136570	2	2	3		136570	2	1	4		136570	2	2	4
136670	2	2	3		136670	2	1	3		136670	1	2	3
136770	2	1	2		136770	2	1	3		136770	2	2	4
136870	2	1	2		136870	1	1	3		136870	1	1	3
136970	3	2	3		136970	1	2	3		136970	1	1	5
137070	3	2	2		137070	2	1	3		137070	1	2	4
137170	2	2	2		137170	1	2	3		137170	2	1	2
137270	2	2	3		137270	1	2	4		137270	1	2	5
137370	2	1	3		137370	2	2	2		137370	1	1	2
137470	1	2	3		137470	1	1	3		137470	1	1	4
137570	2	1	2		137570	2	1	3		137570	3	2	5
137670	1	2	2		137670	2	2	3		137670	2	1	5
137770	2	2	2		137770	2	1	2		137770	1	2	4
137870	2	2	2		137870	2	1	4		137870	2	2	4
137970	3	2	2		137970	1	2	3		137970	1	1	4
138070	2	1	2		138070	1	1	2		138070	1	1	4
138170	1	1	2		138170	2	2	4		138170	2	2	3
138270	2	2	3		138270	1	2	5		138270	1	1	3
138370	3	1	3		138370	1	2	4		138370	2	2	2
138470	2	2	3		138470	1	1	2		138470	1	1	5
138570	2	2	3		138570	1	2	3		138570	1	2	3
138670	2	2	3		138670	1	1	2		138670	2	2	7
138770	2	2	1		138770	1	1	5		138770	2	2	3
138870	2	2	2		138870	1	3	3		138870	2	1	4
138970	3	2	2		138970	1	2	3		138970	1	1	3
139070	1	2	2		139070	2	1	4		139070	1	1	3
139170	2	2	3		139170	1	1	4		139170	1	1	4
139270	2	1	3		139270	2	2	3		139270	1	2	4
139370	1	2	1		139370	2	2	3		139370	1	2	4
139470	2	1	2		139470	2	2	3		139470	1	2	3
139570	2	2	3		139570	2	2	2		139570	2	2	4
139670	2	2	1		139670	1	2	3		139670	2	1	5
139770	2	1	3		139770	3	2	2		139770	2	1	5
139870	1	1	3		139870	2	2	2		139870	1	2	3
139970	1	1	2		139970	2	1	3		139970	2	1	4
140070	2	1	2		140070	1	1	4		140070	1	1	5
140170	2	1	2		140170	1	2	3		140170	2	2	4
140270	2	2	2		140270	1	2	4		140270	2	1	2
140370	2	2	1		140370	1	1	4		140370	1	1	3
140470	2	2	3		140470	1	2	4		140470	1	2	4
140570	1	1	4		140570	1	1	3		140570	2	1	3
140670	1	2	3		140670	1	1	3		140670	2	1	3
140770	2	1	2		140770	1	1	3		140770	1	1	4
140870	2	2	3		140870	2	2	2		140870	1	2	3
140970	1	1	2		140970	1	2	4		140970	1	2	5
141070	2	1	2		141070	2	1	2		141070	2	1	3
141170	1	1	2		141170	1	1	4		141170	2	2	4
141270	3	1	2		141270	2	1	4		141270	2	2	2
141370	2	2	3		141370	2	1	1		141370	1	2	5
141470	1	2	2		141470	2	1	3		141470	1	1	3
141570	2	1	2		141570	2	2	2		141570	2	1	4
141670	2	1	2		141670	2	1	3		141670	2	2	5
141770	2	1	3		141770	2	2	3		141770	1	1	4
141870	3	2	2		141870	2	1	2		141870	2	2	5
141970	2	1	2		141970	1	2	4		141970	1	2	3
142070	2	2	1		142070	1	1	5		142070	1	1	4
142170	2	2	3		142170	1	1	4		142170	2	2	4
142270	3	2	2		142270	2	1	2		142270	1	2	4
142370	2	1	3		142370	1	1	3		142370	2	1	4
142470	3	2	2		142470	1	2	5		142470	3	1	4
142570	2	1	3		142570	1	2	2		142570	1	2	3
142670	2	1	1		142670	2	2	3		142670	1	3	3
142770	2	3	2		142770	2	2	3		142770	1	1	6
142870	3	2	2		142870	1	1	3		142870	2	1	5
142970	2	2	2		142970	1	2	2		142970	1	1	3
143070	2	1	2		143070	1	2	4		143070	1	2	4
143170	2	1	2		143170	1	1	3		143170	1	1	5
143270	3	2	2		143270	2	2	3		143270	1	2	4
143370	1	1	1		143370	2	1	3		143370	1	2	3
143470	1	1	2		143470	1	1	3		143470	1	2	4
143570	2	2	2		143570	1	2	3		143570	1	2	5
143670	2	3	2		143670	1	2	4		143670	2	2	5
143770	3	2	2		143770	2	2	3		143770	1	2	4
143870	2	2	2		143870	1	2	3		143870	1	2	4
143970	3	2	2		143970	1	2	3		143970	2	1	3
144070	1	3	2		144070	1	1	2		144070	1	2	4
144170	2	2	2		144170	1	2	2		144170	1	2	3
144270	3	2	2		144270	1	2	2		144270	1	2	4
144370	2	2	2		144370	2	2	3		144370	1	1	5
144470	2	1	2		144470	1	2	3		144470	2	1	4
144570	2	2	5		144570	2	1	2		144570	2	2	4
144670	2	2	2		144670	2	1	3		144670	1	1	3
144770	1	2	2		144770	2	2	3		144770	2	2	3
144870	4	1	2		144870	1	1	4		144870	2	2	4
144970	2	2	3		144970	2	2	4		144970	1	2	5
145070	2	2	3		145070	2	2	2		145070	2	2	3
145170	1	1	3		145170	1	2	3		145170	1	1	4
145270	2	1	3		145270	1	1	2		145270	2	2	4
145370	1	2	2		145370	1	1	3		145370	2	2	5
145470	2	2	2		145470	2	1	3		145470	2	2	3
145570	2	2	3		145570	2	1	3		145570	1	1	5
145670	2	1	3		145670	2	1	3		145670	2	2	4
145770	2	1	3		145770	1	1	2		145770	1	1	4
145870	2	1	2		145870	1	1	3		145870	2	2	5
145970	2	1	2		145970	2	1	3		145970	1	2	2
146070	2	2	3		146070	2	1	3		146070	1	1	4
146170	2	1	3		146170	1	1	3		146170	2	1	2
146270	2	2	1		146270	1	1	2		146270	1	1	4
146370	2	2	2		146370	3	1	3		146370	2	2	5
146470	1	2	2		146470	2	1	2		146470	2	1	3
146570	2	1	2		146570	1	2	3		146570	1	1	5
146670	2	2	2		146670	2	1	4		146670	2	1	5
146770	3	2	2		146770	1	2	3		146770	1	2	4
146870	3	1	2		146870	1	1	3		146870	1	2	4
146970	2	1	1		146970	1	2	4		146970	1	1	3
147070	3	1	2		147070	1	1	3		147070	2	1	5
147170	2	1	2		147170	2	1	2		147170	1	1	4
147270	2	1	2		147270	1	1	3		147270	1	1	3
147370	1	2	3		147370	2	1	4		147370	1	1	5
147470	2	1	2		147470	1	1	3		147470	1	2	4
147570	1	2	2		147570	2	1	3		147570	2	2	5
147670	2	2	2		147670	1	2	2		147670	2	2	4
147770	2	2	2		147770	2	1	3		147770	2	2	3
147870	3	2	3		147870	1	1	4		147870	1	1	4
147970	2	3	2		147970	1	1	3		147970	1	1	3
148070	2	1	2		148070	2	2	3		148070	2	2	4
148170	2	2	2		148170	1	1	3		148170	2	1	3
148270	2	2	2		148270	1	1	3		148270	2	2	3
148370	2	2	3		148370	1	2	3		148370	1	1	4
148470	2	1	3		148470	1	1	2		148470	1	1	4
148570	2	1	3		148570	2	2	3		148570	2	1	4
148670	2	1	2		148670	2	1	4		148670	2	1	5
148770	3	2	2		148770	2	1	3		148770	1	1	3
148870	2	2	2		148870	1	1	3		148870	1	1	4
148970	2	1	2		148970	2	1	2		148970	2	2	3
149070	2	2	1		149070	2	2	4		149070	1	2	4
149170	2	2	2		149170	1	2	2		149170	2	1	5
149270	1	1	2		149270	2	1	3		149270	2	1	3
149370	2	1	2		149370	1	1	3		149370	2	1	5
149470	2	2	3		149470	2	1	2		149470	1	2	4
149570	2	2	2		149570	1	1	3		149570	1	1	3
149670	1	2	3		149670	1	1	3		149670	2	1	3
149770	2	1	2		149770	2	1	3		149770	2	2	3
149870	2	1	3		149870	1	1	4		149870	1	2	5
149970	2	2	1		149970	2	2	4		149970	1	1	5
150070	2	1	1		150070	1	1	2		150070	1	2	4
150170	2	1	2		150170	1	1	3		150170	1	1	3
150270	2	1	2		150270	1	2	3		150270	2	2	3
150370	2	2	3		150370	1	1	3		150370	1	2	4
150470	2	1	1		150470	1	1	3		150470	1	1	4
150570	3	1	3		150570	1	1	3		150570	2	2	3
150670	2	1	2		150670	1	1	3		150670	1	1	3
150770	2	1	2		150770	1	1	3		150770	2	1	4
150870	2	2	2		150870	1	1	4		150870	1	1	5
150970	3	1	2		150970	1	1	3		150970	1	1	4
151070	1	2	3		151070	1	1	3		151070	2	1	4
151170	2	1	1		151170	1	1	3		151170	2	1	4
151270	2	1	2		151270	1	2	2		151270	3	2	3
151370	2	1	2		151370	2	1	4		151370	1	1	3
151470	2	1	2		151470	1	1	2		151470	1	2	3
151570	2	2	2		151570	1	2	1		151570	1	2	5
151670	2	2	1		151670	1	1	4		151670	2	2	4
151770	2	2	2		151770	2	2	3		151770	2	1	5
151870	2	2	2		151870	1	1	4		151870	1	1	5
151970	1	1	3		151970	1	1	3		151970	2	1	4
152070	2	1	3		152070	1	1	3		152070	1	1	4
152170	2	1	2		152170	1	1	3		152170	2	2	3
152270	1	2	2		152270	2	1	2		152270	1	2	3
152370	2	1	3		152370	1	1	4		152370	1	2	3
152470	2	1	1		152470	2	2	3		152470	1	2	4
152570	2	1	2		152570	1	1	2		152570	2	1	5
152670	2	1	2		152670	2	2	5		152670	2	1	4
152770	2	1	2		152770	1	1	2		152770	1	2	5
152870	2	2	1		152870	1	1	4		152870	1	2	4
152970	2	2	2		152970	1	1	2		152970	2	1	3
153070	2	2	3		153070	2	1	3		153070	1	1	4
153170	2	1	2		153170	2	1	3		153170	1	2	5
153270	2	2	2		153270	2	2	3		153270	1	2	4
153370	2	2	4		153370	1	1	3		153370	1	1	4
153470	2	1	2		153470	1	1	1		153470	1	1	3
153570	2	2	2		153570	1	2	2		153570	1	1	4
153670	2	2	1		153670	1	1	3		153670	2	2	4
153770	2	2	3		153770	2	1	2		153770	2	1	4
153870	2	1	2		153870	1	1	3		153870	2	2	4
153970	2	2	2		153970	1	2	2		153970	2	2	3
154070	3	1	2		154070	1	2	4		154070	1	1	3
154170	3	2	3		154170	1	1	3		154170	1	1	3
154270	3	2	2		154270	2	1	4		154270	1	2	4
154370	2	2	3		154370	2	1	4		154370	1	1	3
154470	1	1	2		154470	1	2	3		154470	1	2	4
154570	2	1	3		154570	1	2	2		154570	1	2	4
154670	2	2	4		154670	2	2	3		154670	1	1	3
154770	1	1	5		154770	1	1	2		154770	1	2	5
154870	2	1	1		154870	1	2	3		154870	1	1	5
154970	1	2	3		154970	1	1	2		154970	2	2	3
155070	2	1	3		155070	1	1	2		155070	1	2	3
155170	1	2	1		155170	1	1	3		155170	2	2	2
155270	2	1	4		155270	2	1	2		155270	1	1	3
155370	2	1	2		155370	2	1	3		155370	1	2	4
155470	2	1	2		155470	2	2	2		155470	2	1	4
155570	2	2	1		155570	1	2	3		155570	1	2	4
155670	1	1	1		155670	2	1	2		155670	1	2	5
155770	2	1	3		155770	1	1	2		155770	2	1	4
155870	2	1	2		155870	1	2	1		155870	2	1	3
155970	2	1	4		155970	1	1	3		155970	1	1	3
156070	2	1	1		156070	1	1	4		156070	1	1	5
156170	2	2	2		156170	2	2	4		156170	2	2	4
156270	2	3	3		156270	2	1	3		156270	2	1	5
156370	2	2	3		156370	1	2	3		156370	2	1	5
156470	3	1	3		156470	2	1	3		156470	2	2	4
156570	2	1	2		156570	1	2	3		156570	1	2	5
156670	1	1	1		156670	1	2	4		156670	2	1	5
156770	2	2	2		156770	1	1	2		156770	2	1	3
156870	2	2	3		156870	2	2	3		156870	1	1	5
156970	2	1	2		156970	2	1	3		156970	1	2	4
157070	2	1	2		157070	2	2	2		157070	1	1	3
157170	2	1	2		157170	1	2	5		157170	1	2	3
157270	2	1	2		157270	2	2	3		157270	2	2	3
157370	2	2	2		157370	2	1	3		157370	1	1	3
157470	2	1	3		157470	1	2	3		157470	2	2	4
157570	2	1	2		157570	2	1	4		157570	1	1	4
157670	3	2	2		157670	1	1	2		157670	1	1	4
157770	3	1	2		157770	2	1	4		157770	2	2	5
157870	2	2	2		157870	1	2	2		157870	1	2	4
157970	3	2	2		157970	1	2	2		157970	2	1	4
158070	2	1	3		158070	1	1	3		158070	3	1	3
158170	2	1	2		158170	2	2	3		158170	2	2	4
158270	1	2	1		158270	1	1	3		158270	2	2	4
158370	2	1	2		158370	2	2	2		158370	1	1	2
158470	1	1	2		158470	1	2	3		158470	1	1	4
158570	2	1	1		158570	1	1	2		158570	1	1	5
158670	2	2	3		158670	2	1	2		158670	1	2	4
158770	4	2	3		158770	1	2	2		158770	1	2	4
158870	2	2	2		158870	2	1	2		158870	1	2	3
158970	3	2	2		158970	1	1	3		158970	2	2	3
159070	2	1	2		159070	2	2	2		159070	1	1	4
159170	2	1	2		159170	1	1	2		159170	1	2	5
159270	1	1	2		159270	1	1	4		159270	1	1	3
159370	2	2	2		159370	2	2	3		159370	1	1	4
159470	3	2	2		159470	2	1	2		159470	2	1	4
159570	2	2	2		159570	1	1	4		159570	2	1	5
159670	2	1	2		159670	2	2	2		159670	1	1	5
159770	3	1	2		159770	1	1	3		159770	1	1	5
159870	2	1	2		159870	2	2	3		159870	2	2	4
159970	1	2	2		159970	2	1	3		159970	3	2	3
160070	2	2	2		160070	1	1	3		160070	1	1	3
160170	2	2	2		160170	2	1	2		160170	2	2	4
160270	3	2	1		160270	1	2	2		160270	1	2	3
160370	2	1	2		160370	1	2	4		160370	1	2	5
160470	2	1	2		160470	2	2	4		160470	2	2	4
160570	2	1	2		160570	1	1	2		160570	2	1	3
160670	3	2	3		160670	1	2	2		160670	2	2	3
160770	2	1	3		160770	1	2	3		160770	1	1	4
160870	1	1	3		160870	2	1	3		160870	2	2	3
160970	2	2	2		160970	2	1	3		160970	1	1	3
161070	2	1	2		161070	2	2	3		161070	1	1	3
161170	2	2	2		161170	1	2	3		161170	1	2	4
161270	2	1	2		161270	1	1	2		161270	3	1	3
161370	2	2	3		161370	2	2	4		161370	2	2	4
161470	2	1	1		161470	1	1	2		161470	1	3	3
161570	1	1	2		161570	1	2	3		161570	1	1	4
161670	2	1	2		161670	1	1	3		161670	1	1	3
161770	2	1	2		161770	1	2	4		161770	3	1	4
161870	2	1	1		161870	2	2	3		161870	2	2	2
161970	2	2	3		161970	2	2	4		161970	2	2	2
162070	2	2	1		162070	2	2	4		162070	1	2	3
162170	2	2	2		162170	1	2	4		162170	1	2	4
162270	2	2	1		162270	2	1	3		162270	1	1	4
162370	2	1	2		162370	2	2	3		162370	1	2	2
162470	2	3	2		162470	2	1	2		162470	1	2	5
162570	1	1	3		162570	1	2	3		162570	1	2	4
162670	2	1	3		162670	2	1	3		162670	2	2	3
162770	2	2	3		162770	1	1	3		162770	2	2	4
162870	2	2	2		162870	1	1	3		162870	2	1	4
162970	2	1	3		162970	2	1	2		162970	2	1	4
163070	3	2	1		163070	1	1	4		163070	2	3	3
163170	2	2	2		163170	2	2	3		163170	1	2	4
163270	1	1	1		163270	2	1	2		163270	2	2	4
163370	2	2	2		163370	1	1	4		163370	1	1	3
163470	3	2	2		163470	1	1	2		163470	1	1	4
163570	2	1	2		163570	1	1	2		163570	3	1	4
163670	2	2	2		163670	2	1	3		163670	2	1	3
163770	2	1	2		163770	1	2	2		163770	2	1	4
163870	3	1	2		163870	2	2	3		163870	1	2	4
163970	3	1	1		163970	1	2	2		163970	1	2	3
164070	3	2	2		164070	2	2	3		164070	1	2	4
164170	2	2	2		164170	1	1	4		164170	1	1	4
164270	2	2	3		164270	2	1	3		164270	3	1	3
164370	1	1	4		164370	1	1	2		164370	2	2	3
164470	2	2	3		164470	2	2	2		164470	2	1	3
164570	2	1	2		164570	2	2	2		164570	2	2	3
164670	2	2	3		164670	2	1	2		164670	2	2	4
164770	2	1	3		164770	2	2	3		164770	1	2	3
164870	2	2	2		164870	2	3	2		164870	2	2	2
164970	2	2	2		164970	1	2	2		164970	2	2	5
165070	2	1	2		165070	2	2	2		165070	2	2	4
165170	2	1	2		165170	2	1	3		165170	1	2	3
165270	3	1	2		165270	2	1	2		165270	2	2	4
165370	2	1	2		165370	1	2	4		165370	2	1	2
165470	1	1	2		165470	1	1	3		165470	1	2	3
165570	3	2	1		165570	1	2	3		165570	1	1	5
165670	1	1	2		165670	1	1	2		165670	2	2	3
165770	2	1	1		165770	1	2	2		165770	2	3	3
165870	2	2	1		165870	1	2	3		165870	1	2	3
165970	1	1	3		165970	2	2	3		165970	2	3	5
166070	1	2	2		166070	2	3	3		166070	1	1	4
166170	2	2	3		166170	2	1	2		166170	1	2	2
166270	2	1	3		166270	1	2	3		166270	1	1	3
166370	3	1	2		166370	2	1	3		166370	1	2	5
166470	2	1	3		166470	2	1	3		166470	1	1	3
166570	1	1	3		166570	2	2	3		166570	2	1	4
166670	1	1	1		166670	1	2	4		166670	1	3	3
166770	2	2	2		166770	1	1	2		166770	1	1	4
166870	1	1	2		166870	2	2	2		166870	1	1	4
166970	1	1	2		166970	1	2	4		166970	1	2	5
167070	1	2	2		167070	1	1	3		167070	1	1	3
167170	3	1	2		167170	1	3	4		167170	1	2	6
167270	1	2	2		167270	1	2	2		167270	1	2	4
167370	2	1	3		167370	2	1	4		167370	2	2	3
167470	3	1	2		167470	1	2	3		167470	1	2	4
167570	1	2	2		167570	2	2	3		167570	1	2	4
167670	1	1	2		167670	1	1	1		167670	2	1	3
167770	1	2	3		167770	1	1	2		167770	1	1	4
167870	2	2	3		167870	1	1	3		167870	2	2	4
167970	2	1	2		167970	2	1	4		167970	1	1	3
168070	2	2	2		168070	2	2	2		168070	1	1	3
168170	2	1	2		168170	1	2	3		168170	1	2	3
168270	2	2	2		168270	2	1	4		168270	2	2	3
168370	2	1	1		168370	1	2	2		168370	1	1	3
168470	2	1	2		168470	1	1	4		168470	1	1	3
168570	2	2	1		168570	2	2	3		168570	2	1	2
168670	1	1	1		168670	1	2	3		168670	1	1	4
168770	3	2	1		168770	1	2	3		168770	2	2	3
168870	1	1	3		168870	2	1	3		168870	1	1	3
168970	3	2	2		168970	2	2	2		168970	1	1	3
169070	2	2	2		169070	2	1	2		169070	2	2	3
169170	1	2	3		169170	2	2	3		169170	2	2	2
169270	2	3	2		169270	2	1	3		169270	2	1	4
169370	2	2	2		169370	1	1	4		169370	2	2	4
169470	1	1	3		169470	1	2	3		169470	2	1	6
169570	2	1	2		169570	1	1	3		169570	1	1	3
169670	2	2	2		169670	1	1	2		169670	1	2	3
169770	2	1	2		169770	1	2	2		169770	1	1	4
169870	2	2	2		169870	1	1	2		169870	2	1	4
169970	2	1	3		169970	1	2	5		169970	1	1	3
170070	1	1	2		170070	3	2	4		170070	2	1	4
170170	2	1	2		170170	1	2	4		170170	1	1	5
170270	2	1	2		170270	2	1	3		170270	2	2	3
170370	3	1	2		170370	2	3	2		170370	2	2	4
170470	2	1	2		170470	1	1	3		170470	1	2	3
170570	2	1	2		170570	2	1	3		170570	1	1	3
170670	2	1	2		170670	1	1	2		170670	2	2	2
170770	2	1	3		170770	1	1	2		170770	2	1	5
170870	2	1	2		170870	1	2	3		170870	2	1	4
170970	2	1	1		170970	1	1	2		170970	2	2	3
171070	1	2	2		171070	1	1	3		171070	1	2	3
171170	2	1	4		171170	2	2	3		171170	2	1	4
171270	2	2	2		171270	1	1	4		171270	1	2	3
171370	2	1	2		171370	1	1	2		171370	2	2	3
171470	1	2	2		171470	2	2	3		171470	1	2	3
171570	2	2	2		171570	1	1	3		171570	1	1	4
171670	1	2	2		171670	2	2	3		171670	1	3	4
171770	2	1	2		171770	1	1	2		171770	2	1	3
171870	2	2	3		171870	1	2	4		171870	1	2	3
171970	2	2	2		171970	1	2	3		171970	2	2	6
172070	2	1	1		172070	1	2	3		172070	2	2	4
172170	2	2	1		172170	2	1	2		172170	1	1	4
172270	1	1	1		172270	2	1	2		172270	2	1	3
172370	2	1	2		172370	2	1	2		172370	2	2	3
172470	2	2	3		172470	2	2	3		172470	1	2	3
172570	2	2	3		172570	1	2	2		172570	1	2	4
172670	1	1	3		172670	1	2	2		172670	1	3	4
172770	2	1	3		172770	1	2	2		172770	1	1	4
172870	1	2	2		172870	1	2	3		172870	2	2	4
172970	2	2	2		172970	1	1	4		172970	2	1	2
173070	1	3	2		173070	2	1	3		173070	2	2	2
173170	2	1	3		173170	1	2	4		173170	2	1	4
173270	2	1	3		173270	2	1	3		173270	1	1	4
173370	2	1	3		173370	1	1	3		173370	2	2	4
173470	2	1	1		173470	2	2	3		173470	2	2	3
173570	1	1	2		173570	1	1	3		173570	1	2	4
173670	2	1	2		173670	2	2	1		173670	2	1	3
173770	2	2	2		173770	2	1	2		173770	2	1	2
173870	2	2	2		173870	1	1	4		173870	1	2	3
173970	2	1	2		173970	1	2	3		173970	1	1	3
174070	2	1	2		174070	2	1	3		174070	1	2	4
174170	2	1	2		174170	1	1	4		174170	1	1	4
174270	2	2	1		174270	1	1	4		174270	2	1	3
174370	2	2	2		174370	1	2	3		174370	2	1	3
174470	2	2	3		174470	2	1	3		174470	1	2	4
174570	2	2	3		174570	2	2	2		174570	2	1	3
174670	1	1	1		174670	1	1	2		174670	1	3	3
174770	2	2	3		174770	1	1	3		174770	1	1	3
174870	1	1	3		174870	1	1	4		174870	2	1	4
174970	2	1	2		174970	1	2	4		174970	2	2	3
175070	1	2	2		175070	1	2	2		175070	1	2	4
175170	2	2	3		175170	2	2	2		175170	1	1	3
175270	2	1	3		175270	1	2	2		175270	1	1	4
175370	3	1	1		175370	2	2	3		175370	2	1	3
175470	2	1	3		175470	2	2	2		175470	1	2	2
175570	2	2	2		175570	1	2	3		175570	1	2	2
175670	1	1	2		175670	1	2	2		175670	1	2	4
175770	2	1	2		175770	1	3	2		175770	2	1	4
175870	2	2	2		175870	2	1	4		175870	1	2	3
175970	1	1	2		175970	2	1	4		175970	1	2	3
176070	2	1	3		176070	2	3	4		176070	1	1	4
176170	2	2	2		176170	1	2	2		176170	2	1	3
176270	2	1	4		176270	2	1	2		176270	2	2	3
176370	4	2	2		176370	2	2	2		176370	1	1	3
176470	2	1	2		176470	2	1	3		176470	1	2	3
176570	2	2	2		176570	1	2	2		176570	1	2	3
176670	2	1	2		176670	2	1	2		176670	2	2	4
176770	1	1	2		176770	1	1	2		176770	2	2	2
176870	2	2	3		176870	1	1	2		176870	2	2	4
176970	2	2	2		176970	1	1	2		176970	1	1	3
177070	2	1	2		177070	2	2	4		177070	2	2	4
177170	2	2	2		177170	1	2	4		177170	1	2	3
177270	2	2	2		177270	1	1	2		177270	1	2	4
177370	2	2	2		177370	1	1	3		177370	1	1	5
177470	2	1	3		177470	2	1	3		177470	2	1	4
177570	2	1	3		177570	1	2	3		177570	1	2	3
177670	2	1	2		177670	1	3	2		177670	2	1	2
177770	1	1	4		177770	2	2	3		177770	1	1	2
177870	2	2	3		177870	3	1	2		177870	1	1	3
177970	2	1	3		177970	1	1	3		177970	1	1	2
178070	2	2	2		178070	1	2	4		178070	2	1	3
178170	3	1	2		178170	2	2	3		178170	2	1	3
178270	2	1	2		178270	2	2	3		178270	1	1	5
178370	1	1	2		178370	2	2	2		178370	1	1	4
178470	1	1	2		178470	1	1	3		178470	2	1	3
178570	2	2	2		178570	2	2	3		178570	1	1	3
178670	2	2	3		178670	2	1	3		178670	1	2	4
178770	3	1	2		178770	2	2	3		178770	2	3	3
178870	2	1	2		178870	1	2	2		178870	1	2	3
178970	2	1	3		178970	1	1	3		178970	2	2	4
179070	2	2	3		179070	1	2	4		179070	1	1	3
179170	1	1	2		179170	2	2	3		179170	1	2	4
179270	3	1	2		179270	2	1	2		179270	1	2	3
179370	2	1	2		179370	1	2	2		179370	2	1	4
179470	1	1	3		179470	2	2	3		179470	1	1	3
179570	2	2	1		179570	2	2	4		179570	1	2	4
179670	2	1	1		179670	1	1	3		179670	1	2	5
179770	2	1	2		179770	1	2	3		179770	1	1	3
179870	1	1	2		179870	1	1	3		179870	1	1	3
179970	1	1	2		179970	2	2	3		179970	2	1	3
180070	2	1	2		180070	1	3	4		180070	1	1	5
180170	2	1	2		180170	2	1	3		180170	2	2	2
180270	2	1	3		180270	2	1	3		180270	1	2	3
180370	3	1	2		180370	1	2	3		180370	1	1	4
180470	2	1	2		180470	1	2	3		180470	2	1	4
180570	1	1	2		180570	1	1	3		180570	1	1	4
180670	2	2	2		180670	1	2	3		180670	1	1	5
180770	2	1	2		180770	1	2	2		180770	1	1	4
180870	2	1	2		180870	1	1	3		180870	2	1	3
180970	1	1	4		180970	1	1	3		180970	2	2	4
181070	1	1	2		181070	1	2	3		181070	2	1	3
181170	2	1	2		181170	1	2	3		181170	1	1	3
181270	2	2	2		181270	2	2	4		181270	1	1	4
181370	1	1	2		181370	1	2	3		181370	2	1	3
181470	2	1	2		181470	1	2	2		181470	1	1	4
181570	2	1	2		181570	1	2	3		181570	1	2	3
181670	2	1	1		181670	2	1	1		181670	2	1	5
181770	1	1	2		181770	1	1	3		181770	1	2	2
181870	1	1	2		181870	2	2	3		181870	1	1	5
181970	2	2	2		181970	1	2	3		181970	1	2	4
182070	1	2	2		182070	1	2	3		182070	1	1	3
182170	1	2	2		182170	2	1	3		182170	1	1	2
182270	2	2	2		182270	1	2	3		182270	1	2	3
182370	2	1	3		182370	1	2	3		182370	1	1	3
182470	1	1	2		182470	2	1	3		182470	1	1	4
182570	1	1	2		182570	1	1	2		182570	2	2	5
182670	2	1	2		182670	2	1	5		182670	1	2	4
182770	3	2	2		182770	1	2	4		182770	1	1	3
182870	2	1	2		182870	1	3	3		182870	2	1	3
182970	1	1	3		182970	1	2	3		182970	1	1	3
183070	2	1	2		183070	2	1	2		183070	2	2	5
183170	2	1	2		183170	2	2	2		183170	1	2	4
183270	2	2	4		183270	1	2	5		183270	2	1	3
183370	2	1	3		183370	2	2	3		183370	1	1	2
183470	3	1	1		183470	1	1	3		183470	1	1	4
183570	2	1	2		183570	2	2	3		183570	2	1	2
183670	1	1	2		183670	1	1	3		183670	1	2	4
183770	2	2	3		183770	1	3	3		183770	2	2	4
183870	1	2	2		183870	2	2	3		183870	1	2	3
183970	1	2	3		183970	2	1	2		183970	1	2	3
184070	2	1	2		184070	1	2	4		184070	1	1	3
184170	3	2	2		184170	2	2	3		184170	1	1	3
184270	2	1	2		184270	2	2	2		184270	1	1	2
184370	1	2	2		184370	2	2	2		184370	1	1	4
184470	1	2	2		184470	1	2	2		184470	2	2	3
184570	1	1	3		184570	2	2	3		184570	1	1	4
184670	1	1	2		184670	1	2	4		184670	1	2	3
184770	1	1	3		184770	1	2	3		184770	1	1	3
184870	2	2	1		184870	2	1	3		184870	1	1	3
184970	2	1	2		184970	1	2	3		184970	1	1	4
185070	2	2	2		185070	2	2	2		185070	2	1	3
185170	2	1	3		185170	2	2	3		185170	1	2	5
185270	2	2	2		185270	1	3	2		185270	1	1	2
185370	2	2	2		185370	1	2	2		185370	2	1	3
185470	1	1	3		185470	1	2	3		185470	2	2	4
185570	1	2	2		185570	1	2	2		185570	1	1	2
185670	2	1	2		185670	1	2	3		185670	2	1	3
185770	2	2	2		185770	2	1	3		185770	2	1	4
185870	1	2	3		185870	2	2	3		185870	2	1	3
185970	3	1	3		185970	2	2	2		185970	2	1	2
186070	1	1	2		186070	1	1	3		186070	2	2	2
186170	1	2	2		186170	1	2	3		186170	1	1	3
186270	3	2	2		186270	1	2	3		186270	2	3	3
186370	3	1	2		186370	1	1	3		186370	1	1	4
186470	1	1	3		186470	1	2	2		186470	2	2	4
186570	2	1	2		186570	1	1	3		186570	1	2	4
186670	1	2	2		186670	1	2	2		186670	2	1	5
186770	3	1	2		186770	1	1	3		186770	1	1	3
186870	2	2	2		186870	2	2	3		186870	1	2	4
186970	1	2	2		186970	1	2	3		186970	1	2	3
187070	2	1	2		187070	2	1	2		187070	1	2	2
187170	2	1	4		187170	1	2	3		187170	1	1	4
187270	2	1	2		187270	1	2	2		187270	1	1	3
187370	2	1	2		187370	2	2	3		187370	2	2	2
187470	2	2	3		187470	2	1	2		187470	1	1	4
187570	2	2	3		187570	1	2	3		187570	2	2	4
187670	2	1	3		187670	1	1	3		187670	1	2	3
187770	2	1	2		187770	2	1	4		187770	1	1	3
187870	1	2	2		187870	2	1	2		187870	2	1	3
187970	2	2	3		187970	1	2	3		187970	1	2	4
188070	2	1	1		188070	1	1	2		188070	2	2	3
188170	1	2	2		188170	2	2	2		188170	1	2	4
188270	2	2	2		188270	2	2	2		188270	2	1	4
188370	2	1	2		188370	1	1	2		188370	2	2	4
188470	2	1	3		188470	1	1	3		188470	1	1	3
188570	2	1	1		188570	1	1	2		188570	1	1	3
188670	3	1	2		188670	1	2	2		188670	2	2	2
188770	2	1	2		188770	1	2	3		188770	1	1	2
188870	2	1	2		188870	2	2	2		188870	2	2	3
188970	1	2	2		188970	2	2	2		188970	2	2	3
189070	1	2	2		189070	2	2	3		189070	2	2	2
189170	2	2	2		189170	1	2	3		189170	1	1	3
189270	3	1	2		189270	1	2	2		189270	1	2	5
189370	2	2	2		189370	3	1	2		189370	2	2	4
189470	3	1	3		189470	1	2	2		189470	1	2	3
189570	3	2	3		189570	1	1	2		189570	1	1	3
189670	2	1	3		189670	2	1	3		189670	1	2	2
189770	1	1	2		189770	2	2	2		189770	1	1	3
189870	2	1	2		189870	1	2	2		189870	1	1	3
189970	2	1	2		189970	1	1	3		189970	1	1	4
190070	1	2	3		190070	1	1	3		190070	1	1	3
190170	3	2	2		190170	2	1	3		190170	1	1	3
190270	1	2	1		190270	2	1	2		190270	1	2	3
190370	3	1	2		190370	1	1	4		190370	1	1	4
190470	2	1	2		190470	1	2	2		190470	1	2	3
190570	3	2	3		190570	1	2	2		190570	1	2	3
190670	1	1	2		190670	1	2	2		190670	2	1	3
190770	2	1	2		190770	1	2	3		190770	1	2	4
190870	2	1	2		190870	1	2	3		190870	1	1	3
190970	2	2	3		190970	1	1	2		190970	1	2	3
191070	2	1	2		191070	1	1	2		191070	1	2	4
191170	1	2	2		191170	1	2	2		191170	1	1	4
191270	2	2	2		191270	1	1	3		191270	1	2	3
191370	2	1	3		191370	2	2	2		191370	1	2	3
191470	2	1	2		191470	2	2	2		191470	2	2	3
191570	1	2	3		191570	2	2	2		191570	2	2	3
191670	2	1	2		191670	1	1	2		191670	1	1	2
191770	1	1	2		191770	1	2	2		191770	1	1	4
191870	2	1	1		191870	1	1	2		191870	1	2	2
191970	2	1	3		191970	1	1	3		191970	1	1	4
192070	1	2	3		192070	1	2	2		192070	1	2	3
192170	2	2	3		192170	2	1	2		192170	1	3	5
192270	1	2	2		192270	1	1	4		192270	2	2	4
192370	1	1	2		192370	1	1	3		192370	2	2	4
192470	2	1	3		192470	2	1	4		192470	2	1	2
192570	1	2	2		192570	1	2	3		192570	2	2	5
192670	2	1	2		192670	1	1	3		192670	1	2	3
192770	2	1	2		192770	2	2	2		192770	2	2	4
192870	1	2	3		192870	2	2	2		192870	2	1	4
192970	1	1	4		192970	2	1	2		192970	2	2	4
193070	3	1	2		193070	1	1	3		193070	2	2	3
193170	1	2	3		193170	1	2	3		193170	1	1	2
193270	2	2	2		193270	2	1	3		193270	1	2	2
193370	1	2	3		193370	2	2	3		193370	2	1	4
193470	2	2	2		193470	1	1	3		193470	1	1	4
193570	1	2	2		193570	2	2	4		193570	2	2	4
193670	2	1	3		193670	2	2	2		193670	1	1	4
193770	1	2	3		193770	1	1	2		193770	2	1	3
193870	2	2	1		193870	1	2	3		193870	3	2	2
193970	3	3	2		193970	2	1	3		193970	2	2	2
194070	2	1	1		194070	2	1	3		194070	2	1	4
194170	2	1	2		194170	2	2	3		194170	1	1	2
194270	2	1	3		194270	1	2	3		194270	2	1	2
194370	2	1	2		194370	1	1	2		194370	2	1	4
194470	2	1	3		194470	1	2	3		194470	1	2	3
194570	1	1	3		194570	1	2	4		194570	1	1	2
194670	2	1	2		194670	3	1	2		194670	2	1	3
194770	2	1	2		194770	1	2	2		194770	1	2	2
194870	1	1	3		194870	1	1	3		194870	1	1	2
194970	2	1	2		194970	2	2	3		194970	1	2	4
195070	2	2	3		195070	2	1	3		195070	1	1	3
195170	1	2	3		195170	1	1	2		195170	1	1	3
195270	2	2	2		195270	2	1	3		195270	1	3	4
195370	2	1	2		195370	2	2	3		195370	1	2	3
195470	1	1	2		195470	1	1	3		195470	1	2	4
195570	1	1	3		195570	1	1	2		195570	1	1	4
195670	2	2	3		195670	2	1	3		195670	1	1	2
195770	3	1	2		195770	1	1	2		195770	1	1	4
195870	2	1	2		195870	2	1	2		195870	1	1	2
195970	2	1	2		195970	2	2	2		195970	1	1	4
196070	3	1	2		196070	1	1	3		196070	1	2	3
196170	1	1	1		196170	1	1	3		196170	1	1	2
196270	2	2	3		196270	2	2	1		196270	2	2	4
196370	2	2	2		196370	1	1	1		196370	2	1	4
196470	1	1	3		196470	1	2	3		196470	1	2	4
196570	2	2	2		196570	1	2	2		196570	2	2	4
196670	1	1	2		196670	2	1	1		196670	2	1	4
196770	2	2	2		196770	2	1	4		196770	2	2	5
196870	3	1	2		196870	1	2	3		196870	2	1	4
196970	1	2	2		196970	1	1	2		196970	1	1	2
197070	2	1	2		197070	1	1	3		197070	1	1	5
197170	2	2	2		197170	2	2	2		197170	1	2	3
197270	2	1	2		197270	2	2	3		197270	1	1	4
197370	1	2	2		197370	1	3	3		197370	1	1	3
197470	2	2	2		197470	1	2	2		197470	1	1	2
197570	2	1	2		197570	1	1	3		197570	1	1	2
197670	2	1	2		197670	2	1	2		197670	1	2	4
197770	1	1	1		197770	2	2	3		197770	1	2	3
197870	1	1	4		197870	2	2	2		197870	2	2	3
197970	2	1	2		197970	2	2	2		197970	1	2	4
198070	2	1	2		198070	1	1	1		198070	2	1	3
198170	1	2	2		198170	1	2	3		198170	1	1	2
198270	2	2	3		198270	1	2	2		198270	1	1	2
198370	1	1	1		198370	2	1	3		198370	2	2	2
198470	3	2	2		198470	1	2	2		198470	1	1	3
198570	2	2	2		198570	2	2	3		198570	2	1	3
198670	2	1	2		198670	2	2	3		198670	2	1	3
198770	2	1	3		198770	1	2	2		198770	1	1	5
198870	1	1	2		198870	1	2	3		198870	1	1	5
198970	2	2	2		198970	2	3	4		198970	1	1	3
199070	2	2	2		199070	2	1	3		199070	1	1	3
199170	1	2	2		199170	1	2	2		199170	1	1	3
199270	1	1	2		199270	2	2	3		199270	1	1	3
199370	1	1	3		199370	1	1	2		199370	1	2	3
199470	2	1	2		199470	2	2	3		199470	1	2	3
199570	1	1	2		199570	1	2	2		199570	1	2	3
199670	1	1	3		199670	2	2	2		199670	1	1	3
199770	2	2	3		199770	1	2	3		199770	2	1	3
199870	1	1	2		199870	1	1	3		199870	1	2	4
199970	1	2	3		199970	1	2	2		199970	1	1	3
200070	2	2	3		200070	1	1	3		200070	1	1	2
200170	2	1	3		200170	1	2	3		200170	1	1	3
200270	2	1	2		200270	2	2	3		200270	1	1	2
[truncated: 1,002 more rows]

## Sheet: FR C. thermalis
Replicate 1					Replicate 2					Replicate 3
ms	10°C	20°C	30°C		ms	10°C	20°C	30°C		ms	10°C	20°C	30°C
570	1239	1743	2115		570	757	1294	1733		570	1505	2157	2324
670	1247	1733	2106		670	736	1274	1719		670	1470	2130	2291
770	1179	1700	2080		770	700	1226	1689		770	1410	2080	2246
870	1154	1647	2048		870	666	1187	1640		870	1341	2022	2194
970	1106	1591	2015		970	642	1157	1595		970	1297	1962	2142
1070	1082	1548	1981		1070	608	1139	1559		1070	1225	1898	2086
1170	1001	1513	1949		1170	589	1102	1517		1170	1187	1822	2023
1270	980	1496	1916		1270	570	1041	1482		1270	1148	1766	1962
1370	975	1461	1919		1370	532	1020	1446		1370	1090	1688	1901
1470	951	1419	1870		1470	533	999	1425		1470	1036	1626	1843
1570	925	1394	1850		1570	516	989	1383		1570	1007	1598	1796
1670	888	1367	1832		1670	509	943	1366		1670	976	1526	1726
1770	854	1334	1798		1770	500	926	1330		1770	944	1472	1673
1870	854	1316	1774		1870	492	930	1311		1870	908	1433	1619
1970	860	1306	1768		1970	487	912	1287		1970	891	1356	1572
2070	812	1284	1738		2070	468	890	1257		2070	863	1330	1529
2170	811	1255	1732		2170	455	858	1234		2170	829	1290	1494
2270	781	1241	1703		2270	433	860	1221		2270	811	1231	1433
2370	780	1220	1702		2370	440	836	1199		2370	799	1194	1384
2470	763	1216	1667		2470	449	817	1172		2470	769	1170	1347
2570	754	1200	1637		2570	431	837	1163		2570	736	1127	1306
2670	756	1196	1616		2670	439	819	1125		2670	732	1106	1266
2770	748	1166	1620		2770	412	795	1109		2770	713	1074	1207
2870	739	1151	1609		2870	428	780	1112		2870	701	1037	1174
2970	717	1161	1576		2970	407	764	1082		2970	697	1020	1161
3070	719	1149	1576		3070	426	767	1067		3070	666	994	1128
3170	687	1131	1554		3170	408	764	1054		3170	664	954	1105
3270	691	1119	1533		3270	410	746	1029		3270	669	927	1063
3370	670	1110	1505		3370	405	725	1040		3370	626	915	1036
3470	706	1062	1501		3470	398	736	1011		3470	620	909	998
3570	665	1075	1483		3570	380	721	993		3570	604	882	995
3670	665	1089	1486		3670	382	723	992		3670	581	876	935
3770	637	1033	1459		3770	371	710	973		3770	587	832	922
3870	663	1056	1441		3870	372	692	969		3870	565	815	906
3970	651	1049	1425		3970	376	681	925		3970	564	806	875
4070	636	1030	1424		4070	362	662	919		4070	541	786	851
4170	635	1030	1399		4170	362	681	921		4170	545	754	845
4270	646	1013	1394		4270	362	646	909		4270	531	760	809
4370	609	1021	1377		4370	369	663	902		4370	511	747	790
4470	614	1006	1367		4470	343	661	887		4470	499	731	761
4570	631	981	1333		4570	343	640	876		4570	513	713	761
4670	617	983	1347		4670	352	628	855		4670	508	688	740
4770	593	969	1325		4770	342	633	850		4770	472	681	739
4870	611	980	1315		4870	339	635	821		4870	498	674	699
4970	617	958	1308		4970	337	612	819		4970	488	661	689
5070	592	949	1280		5070	341	622	818		5070	463	656	659
5170	584	969	1275		5170	335	610	811		5170	455	639	664
5270	572	954	1252		5270	340	610	818		5270	466	605	627
5370	578	932	1256		5370	336	589	806		5370	447	602	625
5470	593	948	1228		5470	316	588	781		5470	434	576	613
5570	570	933	1219		5570	327	597	779		5570	438	575	593
5670	548	922	1218		5670	315	601	769		5670	422	573	569
5770	573	919	1207		5770	323	564	746		5770	423	567	568
5870	543	904	1189		5870	331	578	748		5870	430	549	552
5970	576	903	1179		5970	312	562	747		5970	410	533	548
6070	545	883	1183		6070	325	540	730		6070	398	535	541
6170	553	878	1173		6170	322	569	742		6170	407	540	532
6270	568	879	1134		6270	315	541	730		6270	407	536	519
6370	553	888	1126		6370	319	545	701		6370	390	511	507
6470	544	872	1118		6470	312	541	698		6470	373	490	495
6570	530	867	1101		6570	317	540	699		6570	382	494	486
6670	539	871	1112		6670	311	532	676		6670	390	500	490
6770	527	842	1093		6770	301	516	669		6770	375	473	490
6870	536	829	1098		6870	312	534	676		6870	377	484	446
6970	530	835	1064		6970	303	520	658		6970	371	461	442
7070	538	812	1067		7070	299	508	658		7070	356	465	444
7170	514	803	1041		7170	285	515	658		7170	365	464	441
7270	532	801	1051		7270	305	493	638		7270	366	465	427
7370	522	817	1034		7370	302	521	647		7370	356	429	415
7470	507	794	1019		7470	293	513	625		7470	360	421	410
7570	509	806	999		7570	290	507	631		7570	352	424	417
7670	503	788	1007		7670	291	506	613		7670	348	411	407
7770	503	796	1002		7770	293	484	610		7770	351	407	378
7870	498	774	995		7870	281	482	591		7870	330	421	372
7970	500	779	961		7970	292	481	599		7970	341	385	374
8070	504	782	957		8070	280	494	588		8070	334	408	367
8170	498	766	968		8170	274	474	585		8170	327	396	369
8270	492	746	954		8270	278	473	589		8270	308	390	367
8370	496	758	929		8370	280	472	571		8370	319	394	343
8470	491	730	929		8470	277	466	579		8470	311	364	350
8570	492	737	925		8570	271	471	549		8570	315	384	327
8670	491	734	896		8670	271	446	566		8670	302	360	323
8770	475	735	895		8770	270	463	538		8770	306	364	341
8870	482	722	896		8870	285	452	540		8870	304	360	315
8970	487	714	882		8970	264	442	553		8970	295	351	315
9070	472	732	872		9070	258	455	538		9070	309	346	313
9170	473	724	874		9170	265	449	542		9170	310	335	313
9270	473	698	868		9270	253	438	511		9270	295	346	312
9370	481	700	861		9370	266	436	530		9370	292	315	290
9470	471	703	863		9470	264	435	517		9470	282	336	302
9570	455	704	827		9570	274	426	507		9570	286	317	295
9670	466	690	833		9670	251	419	483		9670	279	329	278
9770	457	673	813		9770	244	410	504		9770	295	319	280
9870	455	696	817		9870	262	430	479		9870	270	330	269
9970	445	687	803		9970	255	394	505		9970	277	308	265
10070	465	675	799		10070	250	425	492		10070	274	303	275
10170	460	680	796		10170	247	425	473		10170	281	295	261
10270	455	669	797		10270	254	407	469		10270	271	297	255
10370	440	649	776		10370	257	412	453		10370	270	296	273
10470	435	655	784		10470	259	404	455		10470	274	292	265
10570	435	633	757		10570	242	403	455		10570	249	289	251
10670	441	642	741		10670	243	412	464		10670	253	290	243
10770	439	641	749		10770	253	392	451		10770	268	276	245
10870	445	651	749		10870	244	405	448		10870	255	278	247
10970	440	641	744		10970	240	382	462		10970	251	286	236
11070	439	632	722		11070	237	381	445		11070	250	280	225
11170	430	628	699		11170	258	376	433		11170	259	271	243
11270	432	626	717		11270	237	387	425		11270	249	274	242
11370	437	616	693		11370	236	384	427		11370	250	264	221
11470	429	611	689		11470	238	374	425		11470	247	263	207
11570	413	609	711		11570	239	387	411		11570	252	267	215
11670	426	591	680		11670	234	380	422		11670	246	251	225
11770	431	605	674		11770	244	362	411		11770	248	254	200
11870	413	612	684		11870	234	351	399		11870	232	251	204
11970	421	594	664		11970	234	367	403		11970	238	250	205
12070	421	601	673		12070	243	369	401		12070	229	239	204
12170	407	584	665		12170	224	367	388		12170	227	248	206
12270	405	594	653		12270	233	359	410		12270	230	229	205
12370	417	594	647		12370	236	356	392		12370	238	235	199
12470	398	571	656		12470	231	375	384		12470	231	242	196
12570	406	587	640		12570	236	360	372		12570	234	243	190
12670	405	578	634		12670	223	359	371		12670	222	228	187
12770	418	566	619		12770	225	354	373		12770	222	228	184
12870	405	570	608		12870	236	348	378		12870	209	222	188
12970	398	562	630		12970	226	339	362		12970	219	232	182
13070	400	556	610		13070	218	338	367		13070	223	230	185
13170	402	549	585		13170	222	351	363		13170	213	222	180
13270	377	565	603		13270	232	339	352		13270	211	226	179
13370	391	541	570		13370	224	335	347		13370	225	213	177
13470	390	546	578		13470	213	342	350		13470	208	220	169
13570	395	528	568		13570	216	334	341		13570	227	211	165
13670	396	543	556		13670	223	331	343		13670	205	207	172
13770	404	549	568		13770	221	328	339		13770	216	202	172
13870	389	526	563		13870	220	325	343		13870	208	194	158
13970	386	527	551		13970	226	330	331		13970	215	214	170
14070	380	530	552		14070	217	331	336		14070	220	210	166
14170	377	520	554		14170	213	309	333		14170	208	195	156
14270	381	525	553		14270	216	322	316		14270	209	195	147
14370	368	524	523		14370	215	324	321		14370	203	191	159
14470	379	509	548		14470	208	313	323		14470	203	192	150
14570	368	524	537		14570	213	313	314		14570	206	192	157
14670	378	495	525		14670	213	312	319		14670	199	192	148
14770	381	505	517		14770	208	307	301		14770	195	195	142
14870	357	508	515		14870	209	303	309		14870	188	187	143
14970	377	506	501		14970	201	307	322		14970	201	187	147
15070	382	495	515		15070	204	287	294		15070	205	172	138
15170	364	495	486		15170	196	291	296		15170	194	176	143
15270	366	494	498		15270	208	305	288		15270	196	189	150
15370	373	488	477		15370	199	311	301		15370	195	177	132
15470	360	489	475		15470	196	285	287		15470	185	182	138
15570	364	489	486		15570	201	298	285		15570	195	165	139
15670	359	488	473		15670	196	271	283		15670	188	169	135
15770	365	486	472		15770	209	284	289		15770	181	171	134
15870	352	472	467		15870	204	296	291		15870	182	172	138
15970	353	463	475		15970	204	275	275		15970	182	171	135
16070	339	468	475		16070	205	280	271		16070	182	169	126
16170	364	472	459		16170	203	297	262		16170	188	160	128
16270	356	464	447		16270	199	284	280		16270	186	170	128
16370	349	460	459		16370	199	271	272		16370	179	162	128
16470	350	468	448		16470	192	276	267		16470	184	167	121
16570	358	449	452		16570	206	271	256		16570	180	161	123
16670	358	454	431		16670	195	276	268		16670	178	167	122
16770	348	457	447		16770	189	281	259		16770	178	155	117
16870	355	459	430		16870	205	268	257		16870	183	152	114
16970	329	456	425		16970	193	288	256		16970	183	149	112
17070	339	442	428		17070	194	270	247		17070	175	154	116
17170	338	452	415		17170	195	254	239		17170	177	151	110
17270	351	441	415		17270	200	274	241		17270	171	138	112
17370	343	439	395		17370	176	264	254		17370	172	151	114
17470	328	437	401		17470	194	257	251		17470	176	150	106
17570	352	433	407		17570	193	265	238		17570	171	149	104
17670	340	421	395		17670	182	274	236		17670	167	136	115
17770	345	428	397		17770	183	261	234		17770	174	135	108
17870	336	424	382		17870	178	257	237		17870	171	142	110
17970	329	427	380		17970	192	235	224		17970	165	138	100
18070	328	423	378		18070	188	257	227		18070	173	143	104
18170	338	419	378		18170	191	244	228		18170	156	142	101
18270	333	407	388		18270	181	251	236		18270	162	138	108
18370	332	421	361		18370	181	245	225		18370	172	140	110
18470	320	420	365		18470	178	242	216		18470	154	139	101
18570	323	413	373		18570	181	250	241		18570	168	129	92
18670	324	410	364		18670	183	253	227		18670	153	143	92
18770	327	388	380		18770	182	243	226		18770	170	133	95
18870	322	390	364		18870	175	253	225		18870	160	124	91
18970	316	400	351		18970	171	250	221		18970	167	132	93
19070	327	410	364		19070	177	243	205		19070	156	135	98
19170	322	412	342		19170	179	237	209		19170	166	135	93
19270	324	393	344		19270	181	232	220		19270	155	137	89
19370	316	391	350		19370	179	245	209		19370	155	121	93
19470	311	397	337		19470	180	232	212		19470	155	129	87
19570	319	393	348		19570	179	234	220		19570	156	118	83
19670	325	387	329		19670	175	240	208		19670	151	130	88
19770	319	384	338		19770	180	235	199		19770	152	119	89
19870	305	392	316		19870	175	225	207		19870	155	124	80
19970	312	378	327		19970	179	243	192		19970	150	117	83
20070	302	365	335		20070	180	220	191		20070	156	127	86
20170	313	363	326		20170	168	225	194		20170	146	129	85
20270	303	369	315		20270	170	238	179		20270	151	119	86
20370	306	380	313		20370	182	207	194		20370	141	119	83
20470	304	374	316		20470	168	222	196		20470	158	117	86
20570	321	369	322		20570	164	234	187		20570	144	112	76
20670	298	383	314		20670	164	229	191		20670	139	127	81
20770	305	379	313		20770	178	214	187		20770	144	112	80
20870	289	363	300		20870	182	225	184		20870	155	115	77
20970	315	361	298		20970	180	225	173		20970	133	104	82
21070	295	358	302		21070	168	227	176		21070	139	114	77
21170	290	361	284		21170	180	215	187		21170	144	115	78
21270	290	369	293		21270	162	224	182		21270	139	112	76
21370	298	359	302		21370	168	216	174		21370	142	107	80
21470	299	357	292		21470	170	223	169		21470	133	114	74
21570	300	355	294		21570	164	218	175		21570	146	114	75
21670	298	350	279		21670	173	211	177		21670	129	107	75
21770	294	350	279		21770	156	206	171		21770	141	118	74
21870	295	339	286		21870	169	216	169		21870	146	109	77
21970	280	332	281		21970	152	201	161		21970	139	102	71
22070	285	343	271		22070	164	220	177		22070	138	111	73
22170	294	342	274		22170	152	208	174		22170	140	99	69
22270	279	347	263		22270	152	207	168		22270	143	106	65
22370	289	336	267		22370	167	208	168		22370	128	104	70
22470	294	340	264		22470	166	196	157		22470	138	109	71
22570	283	331	249		22570	170	202	169		22570	132	100	64
22670	287	316	255		22670	156	205	165		22670	132	100	64
22770	282	326	259		22770	156	205	158		22770	138	95	66
22870	276	317	250		22870	158	204	154		22870	133	102	68
22970	280	324	256		22970	155	207	144		22970	139	96	66
23070	279	318	239		23070	152	204	154		23070	134	95	61
23170	272	310	239		23170	157	189	164		23170	135	95	68
23270	277	315	230		23270	155	195	152		23270	134	102	62
23370	281	320	238		23370	153	190	151		23370	139	93	67
23470	286	313	246		23470	162	195	146		23470	129	96	62
23570	273	321	245		23570	156	198	147		23570	138	96	59
23670	279	319	242		23670	159	192	147		23670	122	93	62
23770	285	314	230		23770	163	199	145		23770	119	92	60
23870	277	308	225		23870	161	205	146		23870	128	97	67
23970	269	307	236		23970	151	179	141		23970	127	87	63
24070	272	307	220		24070	156	190	146		24070	117	88	62
24170	269	312	235		24170	144	183	147		24170	132	92	57
24270	280	306	225		24270	145	187	133		24270	116	99	61
24370	268	301	228		24370	151	181	146		24370	127	92	53
24470	254	292	226		24470	156	184	137		24470	130	81	65
24570	266	303	233		24570	156	186	136		24570	126	96	53
24670	273	294	217		24670	158	184	141		24670	129	77	55
24770	279	294	206		24770	142	171	135		24770	128	92	60
24870	271	291	219		24870	150	181	141		24870	129	86	52
24970	264	296	229		24970	149	191	135		24970	119	79	52
25070	262	302	215		25070	151	181	135		25070	125	90	58
25170	262	292	211		25170	151	175	136		25170	125	88	55
25270	266	292	207		25270	139	181	135		25270	111	82	51
25370	260	280	217		25370	144	187	127		25370	120	77	56
25470	265	283	213		25470	156	178	137		25470	121	79	56
25570	255	294	202		25570	143	178	131		25570	126	80	52
25670	253	299	208		25670	143	177	118		25670	122	86	54
25770	251	273	197		25770	154	183	117		25770	125	82	49
25870	256	285	197		25870	154	175	131		25870	129	82	55
25970	253	286	195		25970	137	173	118		25970	113	87	50
26070	257	285	194		26070	141	166	119		26070	118	83	50
26170	253	272	196		26170	139	170	119		26170	111	75	53
26270	249	277	186		26270	134	164	120		26270	108	83	45
26370	248	277	195		26370	141	166	113		26370	130	78	53
26470	257	268	178		26470	151	166	117		26470	119	74	56
26570	254	280	175		26570	142	178	111		26570	118	75	45
26670	266	272	188		26670	152	169	117		26670	111	78	47
26770	248	272	201		26770	151	169	115		26770	114	83	48
26870	264	263	186		26870	147	180	112		26870	114	83	48
26970	256	267	172		26970	142	163	117		26970	108	71	46
27070	257	261	188		27070	136	162	110		27070	109	77	47
27170	253	257	176		27170	143	158	113		27170	118	74	41
27270	253	268	184		27270	141	164	110		27270	118	77	47
27370	259	270	178		27370	132	158	102		27370	105	76	44
27470	258	249	178		27470	134	157	113		27470	108	85	49
27570	248	256	173		27570	137	150	110		27570	104	71	48
27670	252	250	178		27670	131	164	108		27670	106	76	42
27770	248	276	156		27770	138	150	112		27770	112	82	46
27870	247	241	179		27870	146	150	108		27870	106	71	44
27970	236	258	168		27970	138	153	107		27970	105	71	44
28070	235	257	157		28070	134	167	106		28070	103	74	48
28170	239	250	176		28170	137	153	97		28170	105	69	43
28270	244	247	171		28270	143	158	102		28270	105	78	36
28370	230	237	161		28370	130	161	101		28370	105	70	42
28470	242	245	152		28470	135	149	101		28470	115	67	39
28570	232	237	161		28570	146	145	98		28570	110	69	39
28670	234	243	158		28670	134	152	106		28670	104	63	41
28770	243	240	165		28770	137	156	104		28770	109	66	43
28870	232	248	160		28870	127	158	96		28870	101	71	43
28970	238	241	152		28970	132	151	99		28970	99	66	45
29070	225	248	155		29070	134	143	100		29070	103	66	45
29170	230	238	166		29170	130	142	97		29170	94	71	40
29270	235	241	148		29270	127	139	104		29270	104	74	36
29370	233	230	150		29370	134	145	101		29370	108	65	39
29470	240	231	145		29470	124	147	93		29470	104	65	45
29570	232	230	152		29570	128	142	97		29570	95	65	37
29670	237	222	152		29670	124	143	87		29670	100	65	33
29770	236	228	141		29770	128	143	91		29770	98	63	40
29870	226	232	141		29870	129	139	91		29870	93	59	37
29970	236	234	143		29970	131	140	92		29970	103	69	41
30070	226	227	143		30070	126	138	92		30070	97	63	40
30170	238	227	145		30170	130	138	94		30170	104	58	43
30270	244	232	136		30270	121	137	90		30270	97	67	38
30370	223	220	134		30370	128	151	84		30370	102	64	37
30470	224	217	145		30470	115	145	85		30470	104	63	35
30570	234	225	134		30570	126	140	89		30570	98	64	36
30670	221	212	129		30670	125	135	91		30670	95	63	37
30770	218	213	134		30770	138	135	86		30770	104	61	39
30870	222	221	136		30870	124	132	89		30870	99	58	37
30970	220	219	128		30970	118	139	82		30970	94	65	34
31070	222	218	135		31070	130	139	84		31070	99	57	34
31170	222	219	134		31170	129	144	83		31170	93	60	39
31270	220	210	141		31270	124	141	79		31270	99	62	40
31370	216	208	129		31370	120	141	78		31370	83	61	31
31470	231	212	126		31470	129	134	80		31470	100	52	36
31570	216	208	129		31570	127	125	87		31570	97	62	37
31670	202	220	118		31670	126	131	84		31670	101	56	30
31770	209	210	132		31770	119	127	89		31770	96	54	33
31870	209	221	128		31870	117	134	82		31870	99	57	32
31970	226	214	124		31970	116	125	77		31970	98	59	31
32070	223	197	122		32070	117	130	73		32070	94	59	31
32170	220	206	118		32170	123	124	84		32170	87	58	27
32270	216	215	114		32270	121	122	73		32270	92	55	33
32370	208	197	125		32370	124	130	81		32370	96	60	35
32470	211	202	125		32470	112	123	77		32470	97	61	35
32570	213	201	116		32570	112	128	83		32570	98	51	29
32670	205	190	117		32670	116	123	72		32670	86	53	30
32770	209	200	115		32770	118	129	77		32770	92	55	34
32870	211	192	112		32870	117	131	77		32870	92	53	37
32970	216	204	112		32970	113	136	75		32970	89	56	32
33070	214	196	110		33070	117	124	71		33070	97	53	34
33170	206	195	114		33170	124	124	67		33170	91	58	35
33270	202	198	114		33270	114	130	77		33270	87	52	28
33370	210	192	110		33370	122	126	73		33370	86	54	30
33470	210	192	110		33470	111	121	69		33470	88	57	27
33570	208	186	109		33570	120	121	74		33570	87	55	28
33670	205	201	102		33670	122	128	69		33670	96	55	30
33770	213	203	105		33770	103	120	71		33770	86	52	29
33870	199	192	104		33870	117	117	75		33870	90	49	26
33970	209	191	110		33970	108	114	67		33970	85	51	34
34070	203	176	112		34070	112	116	71		34070	88	54	27
34170	204	187	111		34170	115	123	64		34170	84	52	33
34270	202	184	103		34270	110	118	74		34270	92	51	32
34370	200	191	108		34370	112	117	72		34370	85	54	29
34470	205	181	106		34470	112	114	65		34470	90	53	28
34570	197	181	101		34570	109	111	69		34570	85	50	31
34670	210	180	99		34670	112	122	73		34670	85	52	25
34770	204	181	95		34770	111	115	66		34770	88	49	29
34870	201	173	100		34870	107	113	68		34870	87	48	31
34970	189	185	100		34970	112	119	66		34970	80	48	25
35070	194	176	102		35070	113	111	67		35070	85	54	31
35170	196	183	99		35170	110	104	66		35170	87	50	27
35270	190	178	99		35270	108	117	64		35270	86	51	28
35370	197	174	91		35370	112	113	61		35370	81	50	26
35470	203	179	89		35470	108	111	60		35470	80	48	28
35570	191	176	89		35570	116	108	64		35570	90	49	30
35670	196	171	97		35670	104	117	61		35670	88	44	24
35770	186	172	88		35770	120	109	55		35770	86	44	28
35870	195	176	90		35870	107	110	56		35870	81	46	29
35970	195	167	92		35970	113	112	61		35970	85	44	27
36070	202	187	89		36070	114	106	61		36070	82	48	26
36170	195	170	92		36170	109	112	55		36170	79	47	24
36270	196	174	90		36270	103	105	64		36270	86	46	23
36370	177	173	98		36370	102	106	56		36370	76	40	26
36470	185	162	92		36470	107	109	57		36470	84	44	29
36570	192	178	88		36570	102	110	55		36570	86	41	28
36670	186	165	94		36670	110	104	56		36670	77	40	24
36770	190	179	86		36770	108	106	62		36770	85	46	23
36870	184	165	90		36870	108	102	53		36870	78	45	25
36970	183	162	78		36970	108	99	63		36970	84	49	26
37070	197	164	77		37070	104	109	55		37070	82	45	25
37170	183	164	88		37170	109	97	56		37170	77	46	26
37270	196	162	90		37270	110	102	54		37270	77	45	25
37370	185	167	80		37370	108	103	47		37370	82	43	22
37470	180	164	83		37470	101	99	58		37470	75	41	22
37570	180	157	79		37570	108	97	53		37570	75	44	24
37670	188	160	83		37670	100	103	57		37670	78	37	24
37770	182	151	81		37770	110	109	59		37770	77	48	25
37870	182	158	83		37870	107	96	51		37870	82	44	26
37970	182	156	79		37970	99	103	49		37970	79	44	26
38070	171	157	81		38070	102	99	49		38070	79	44	26
38170	178	151	80		38170	104	100	55		38170	79	38	23
38270	179	163	76		38270	96	97	52		38270	85	41	24
38370	184	157	84		38370	100	103	57		38370	70	40	29
38470	178	160	80		38470	99	98	52		38470	77	39	25
38570	181	157	77		38570	107	94	60		38570	72	39	23
38670	176	149	72		38670	100	95	57		38670	69	42	20
38770	176	145	81		38770	109	93	49		38770	78	36	27
38870	168	147	77		38870	100	97	54		38870	79	45	20
38970	168	154	69		38970	104	104	50		38970	78	42	20
39070	180	146	76		39070	92	98	50		39070	76	41	22
39170	180	148	73		39170	97	93	47		39170	72	39	21
39270	177	139	71		39270	101	96	48		39270	76	41	22
39370	174	155	71		39370	99	91	50		39370	67	39	19
39470	175	149	72		39470	96	102	50		39470	71	38	24
39570	173	145	81		39570	99	102	51		39570	71	38	28
39670	174	156	80		39670	103	94	48		39670	74	41	25
39770	168	140	71		39770	104	86	47		39770	70	37	22
39870	176	143	69		39870	103	95	46		39870	71	41	22
39970	177	146	66		39970	97	97	50		39970	73	40	25
40070	180	143	72		40070	100	89	45		40070	74	40	24
40170	158	142	63		40170	91	92	53		40170	74	39	23
40270	174	132	73		40270	95	95	46		40270	73	38	23
40370	174	138	72		40370	96	97	48		40370	67	38	25
40470	166	142	66		40470	103	94	45		40470	71	32	20
40570	165	144	67		40570	105	97	46		40570	71	37	21
40670	159	147	64		40670	100	88	48		40670	67	40	24
40770	168	126	74		40770	96	87	47		40770	68	32	19
40870	179	147	68		40870	100	89	43		40870	68	35	19
40970	166	129	72		40970	97	93	41		40970	63	38	22
41070	159	132	69		41070	100	88	44		41070	75	34	22
41170	168	136	65		41170	101	86	40		41170	72	38	22
41270	168	138	63		41270	90	83	40		41270	71	36	19
41370	170	133	66		41370	91	94	44		41370	69	37	20
41470	173	136	55		41470	95	89	44		41470	72	33	20
41570	163	136	58		41570	97	85	48		41570	79	37	23
41670	162	141	62		41670	96	93	37		41670	65	34	21
41770	165	133	68		41770	99	79	42		41770	68	43	20
41870	169	128	67		41870	102	85	44		41870	64	38	20
41970	162	142	67		41970	95	83	38		41970	72	37	21
42070	165	135	63		42070	83	83	45		42070	69	34	22
42170	159	128	62		42170	97	85	42		42170	66	38	21
42270	175	123	69		42270	94	84	39		42270	63	36	22
42370	160	130	56		42370	102	81	39		42370	68	37	20
42470	159	127	65		42470	91	86	41		42470	70	34	21
42570	155	137	57		42570	94	86	38		42570	64	37	21
42670	155	135	59		42670	91	81	41		42670	67	34	20
42770	167	126	61		42770	89	81	39		42770	67	35	22
42870	175	130	65		42870	88	77	39		42870	65	30	16
42970	162	128	58		42970	92	86	39		42970	71	29	22
43070	159	126	59		43070	87	81	38		43070	67	35	21
43170	164	130	56		43170	89	83	40		43170	68	30	22
43270	152	124	58		43270	89	85	38		43270	59	34	20
43370	163	128	58		43370	86	80	36		43370	63	27	19
43470	146	124	58		43470	87	77	41		43470	65	29	20
43570	155	122	53		43570	92	78	37		43570	60	35	17
43670	168	125	61		43670	78	77	39		43670	60	32	22
43770	155	122	55		43770	88	88	38		43770	63	32	17
43870	143	115	58		43870	92	81	38		43870	62	32	19
43970	163	123	53		43970	91	77	35		43970	64	37	19
44070	151	114	55		44070	87	74	35		44070	63	33	17
44170	155	126	49		44170	89	74	38		44170	60	30	17
44270	163	120	56		44270	87	75	39		44270	62	33	19
44370	155	120	55		44370	86	78	38		44370	70	32	21
44470	159	118	52		44470	88	75	35		44470	68	33	20
44570	156	121	57		44570	94	75	34		44570	63	33	17
44670	162	115	56		44670	86	75	35		44670	60	31	20
44770	147	120	55		44770	92	82	41		44770	62	28	14
44870	138	114	52		44870	91	76	32		44870	61	29	19
44970	150	121	52		44970	83	73	32		44970	59	28	19
45070	156	113	64		45070	83	81	34		45070	63	31	16
45170	153	114	49		45170	89	80	38		45170	67	27	16
45270	145	113	50		45270	82	75	41		45270	58	34	16
45370	149	118	49		45370	80	84	32		45370	61	31	19
45470	145	108	53		45470	88	71	30		45470	52	30	21
45570	142	107	50		45570	86	76	38		45570	51	31	13
45670	155	119	47		45670	86	73	35		45670	64	32	17
45770	156	106	51		45770	87	65	36		45770	65	34	15
45870	150	112	49		45870	90	76	31		45870	58	29	20
45970	151	113	46		45970	95	69	34		45970	58	31	15
46070	143	111	49		46070	88	71	32		46070	58	30	16
46170	147	109	53		46170	87	64	35		46170	56	31	19
46270	138	110	46		46270	87	69	29		46270	58	27	13
46370	134	114	50		46370	86	69	34		46370	60	31	18
46470	153	103	43		46470	83	68	35		46470	61	25	15
46570	134	108	52		46570	87	68	33		46570	57	30	19
46670	142	109	47		46670	82	72	32		46670	61	31	20
46770	136	111	51		46770	84	73	28		46770	60	27	17
46870	141	104	54		46870	81	67	27		46870	57	26	17
46970	147	103	45		46970	91	71	31		46970	56	28	17
47070	139	109	49		47070	77	76	31		47070	58	27	18
47170	141	101	45		47170	82	70	36		47170	59	26	16
47270	144	99	44		47270	82	72	32		47270	51	30	17
47370	144	105	42		47370	88	66	33		47370	63	26	13
47470	141	106	48		47470	79	65	32		47470	59	29	12
47570	147	102	46		47570	77	67	32		47570	57	30	16
47670	133	105	48		47670	77	65	32		47670	57	25	16
47770	132	99	44		47770	80	69	34		47770	55	28	16
47870	140	98	37		47870	80	67	26		47870	54	22	12
47970	150	99	42		47970	81	65	34		47970	57	27	17
48070	135	107	44		48070	90	74	34		48070	57	27	13
48170	145	96	42		48170	84	60	24		48170	61	26	14
48270	137	98	43		48270	80	65	31		48270	54	32	13
48370	140	104	45		48370	76	62	29		48370	60	30	19
48470	132	100	42		48470	77	62	32		48470	53	23	16
48570	138	94	40		48570	75	66	30		48570	54	28	16
48670	134	91	41		48670	78	66	31		48670	60	26	14
48770	143	97	41		48770	79	64	28		48770	51	26	13
48870	129	97	44		48870	88	64	29		48870	58	23	17
48970	137	109	42		48970	81	66	32		48970	56	22	16
49070	135	96	37		49070	81	66	30		49070	55	27	14
49170	132	101	43		49170	84	69	29		49170	52	21	17
49270	144	100	44		49270	81	71	27		49270	52	22	13
49370	142	86	37		49370	80	66	29		49370	56	25	15
49470	145	91	46		49470	81	61	32		49470	51	26	14
49570	133	103	38		49570	82	59	28		49570	53	26	14
49670	133	88	49		49670	75	60	26		49670	55	29	14
49770	141	97	44		49770	78	66	28		49770	54	24	15
49870	132	97	40		49870	76	64	25		49870	58	24	16
49970	133	92	40		49970	70	60	30		49970	49	26	14
50070	133	94	38		50070	80	60	26		50070	52	26	14
50170	133	92	37		50170	80	56	22		50170	52	24	12
50270	136	97	40		50270	75	62	27		50270	55	24	15
50370	122	104	43		50370	70	61	25		50370	48	24	15
50470	135	92	40		50470	79	59	26		50470	59	24	14
50570	135	87	40		50570	74	59	30		50570	53	25	14
50670	129	89	39		50670	75	61	24		50670	54	20	18
50770	132	87	38		50770	80	62	27		50770	47	24	16
50870	142	86	33		50870	76	61	28		50870	49	25	16
50970	130	93	40		50970	82	57	24		50970	49	24	15
51070	125	89	37		51070	64	54	25		51070	51	27	13
51170	128	91	36		51170	77	62	25		51170	53	21	15
51270	134	86	39		51270	81	63	24		51270	53	23	13
51370	128	90	38		51370	78	62	29		51370	48	22	15
51470	125	93	33		51470	80	60	25		51470	45	23	14
51570	132	88	35		51570	74	58	23		51570	50	25	13
51670	127	89	36		51670	75	53	24		51670	48	23	17
51770	121	85	37		51770	74	67	20		51770	53	24	15
51870	125	80	35		51870	77	56	21		51870	56	21	12
51970	129	91	37		51970	79	57	25		51970	50	20	15
52070	116	87	36		52070	74	53	25		52070	48	24	10
52170	131	81	35		52170	73	57	24		52170	48	20	14
52270	126	88	36		52270	70	54	23		52270	51	20	18
52370	125	88	38		52370	71	62	24		52370	44	24	14
52470	124	87	33		52470	65	56	25		52470	47	17	15
52570	120	86	37		52570	70	52	23		52570	49	21	13
52670	124	82	31		52670	74	55	23		52670	50	23	15
52770	121	83	34		52770	71	59	24		52770	47	21	13
52870	118	84	39		52870	69	58	24		52870	51	22	13
52970	125	87	37		52970	68	57	27		52970	49	23	15
53070	126	82	35		53070	71	51	21		53070	49	19	13
53170	129	91	34		53170	74	56	25		53170	56	22	13
53270	119	80	39		53270	72	53	24		53270	51	20	15
53370	127	82	34		53370	73	54	22		53370	44	21	11
53470	119	84	32		53470	73	53	25		53470	47	22	14
53570	119	86	32		53570	78	54	23		53570	47	20	15
53670	118	76	29		53670	79	46	22		53670	46	19	14
53770	121	83	38		53770	71	51	21		53770	47	20	14
53870	125	78	30		53870	73	47	23		53870	49	20	16
53970	117	82	36		53970	73	54	20		53970	42	18	15
54070	130	81	36		54070	68	58	24		54070	45	19	15
54170	115	75	33		54170	71	50	22		54170	48	19	15
54270	124	80	32		54270	68	50	24		54270	54	18	16
54370	111	79	33		54370	72	48	25		54370	40	23	13
54470	126	78	32		54470	77	48	20		54470	46	19	13
54570	120	70	32		54570	68	54	20		54570	46	21	14
54670	119	79	31		54670	65	49	21		54670	47	22	13
54770	115	71	31		54770	66	56	22		54770	45	22	13
54870	121	76	29		54870	64	48	20		54870	48	16	15
54970	120	72	32		54970	74	48	24		54970	46	20	15
55070	112	78	30		55070	69	51	23		55070	51	18	16
55170	119	81	37		55170	71	50	24		55170	45	21	12
55270	114	71	28		55270	67	53	20		55270	44	21	12
55370	111	82	29		55370	71	47	16		55370	39	21	12
55470	115	73	29		55470	69	49	23		55470	51	21	11
55570	119	82	32		55570	67	47	18		55570	47	22	13
55670	109	78	32		55670	67	45	24		55670	44	19	13
55770	117	74	32		55770	73	57	18		55770	48	18	13
55870	112	79	36		55870	68	47	22		55870	52	17	10
55970	113	76	33		55970	72	46	20		55970	42	17	13
56070	112	72	31		56070	65	53	21		56070	42	24	12
56170	115	73	31		56170	66	51	23		56170	43	23	15
56270	128	70	31		56270	72	50	17		56270	47	17	12
56370	116	73	33		56370	66	50	22		56370	50	21	16
56470	112	73	30		56470	64	51	19		56470	45	18	13
56570	114	72	28		56570	63	48	21		56570	48	22	14
56670	104	78	29		56670	66	54	21		56670	47	16	14
56770	120	75	31		56770	64	46	19		56770	46	23	12
56870	112	73	31		56870	74	54	18		56870	39	16	12
56970	110	69	31		56970	63	44	17		56970	43	18	14
57070	113	74	27		57070	66	48	21		57070	44	17	14
57170	102	64	30		57170	64	43	19		57170	47	17	14
57270	111	69	27		57270	71	45	19		57270	46	21	12
57370	110	66	29		57370	72	52	18		57370	45	19	12
57470	122	70	32		57470	63	47	22		57470	41	21	14
57570	109	68	28		57570	66	48	20		57570	44	14	12
57670	115	66	32		57670	66	45	21		57670	46	17	15
57770	114	74	27		57770	67	38	20		57770	42	18	15
57870	106	68	29		57870	71	50	18		57870	44	19	11
57970	107	68	26		57970	63	45	18		57970	38	20	9
58070	108	69	31		58070	65	48	20		58070	41	17	13
58170	111	69	27		58170	69	50	19		58170	37	17	12
58270	112	63	26		58270	72	42	18		58270	40	16	13
58370	112	65	28		58370	59	48	18		58370	46	18	10
58470	110	69	26		58470	66	48	17		58470	45	19	13
58570	108	67	34		58570	63	40	23		58570	39	17	14
58670	103	73	24		58670	61	46	17		58670	38	17	15
58770	111	68	29		58770	61	38	20		58770	42	19	13
58870	103	62	31		58870	64	41	21		58870	46	17	12
58970	111	69	26		58970	71	43	17		58970	41	18	14
59070	104	68	25		59070	62	44	18		59070	45	16	16
59170	109	62	26		59170	60	42	20		59170	37	16	10
59270	103	64	30		59270	71	39	19		59270	40	17	12
59370	109	62	25		59370	65	45	16		59370	40	21	13
59470	99	62	27		59470	58	43	18		59470	41	15	13
59570	102	60	27		59570	52	44	19		59570	43	18	13
59670	100	62	27		59670	67	38	21		59670	41	20	14
59770	100	65	29		59770	55	39	19		59770	41	14	10
59870	102	63	29		59870	58	40	19		59870	36	17	13
59970	110	61	26		59970	63	42	20		59970	48	14	14
60070	102	60	26		60070	62	47	20		60070	39	16	14
60170	99	56	29		60170	65	44	15		60170	40	15	15
60270	107	61	25		60270	57	47	20		60270	40	15	12
60370	98	58	25		60370	65	43	19		60370	41	16	11
60470	102	63	26		60470	68	44	17		60470	37	15	11
60570	95	58	28		60570	63	44	20		60570	47	16	12
60670	108	59	27		60670	62	42	16		60670	40	17	12
60770	107	60	29		60770	58	42	16		60770	37	14	13
60870	94	56	27		60870	62	34	14		60870	41	16	15
60970	103	63	23		60970	63	40	17		60970	39	14	13
61070	99	66	22		61070	60	41	17		61070	36	17	16
61170	94	63	26		61170	51	43	18		61170	42	18	12
61270	96	68	27		61270	62	41	19		61270	36	16	13
61370	97	60	24		61370	62	37	14		61370	38	17	11
61470	98	60	23		61470	61	39	16		61470	37	18	14
61570	95	62	29		61570	57	41	16		61570	35	15	12
61670	93	59	23		61670	58	43	18		61670	37	16	11
61770	106	64	22		61770	56	36	22		61770	36	17	9
61870	98	56	25		61870	61	40	18		61870	36	15	12
61970	104	64	25		61970	60	35	17		61970	35	13	10
62070	106	57	25		62070	59	38	15		62070	39	16	11
62170	99	60	27		62170	56	38	18		62170	42	14	13
62270	97	60	24		62270	61	38	16		62270	34	15	10
62370	94	59	25		62370	60	39	16		62370	34	14	12
62470	100	60	24		62470	60	38	15		62470	37	16	11
62570	101	56	26		62570	58	39	16		62570	36	19	13
62670	88	54	26		62670	65	39	18		62670	37	16	10
62770	102	59	28		62770	59	38	18		62770	39	16	9
62870	100	54	23		62870	56	35	16		62870	41	16	10
62970	101	57	25		62970	56	36	16		62970	39	14	13
63070	91	56	19		63070	61	39	16		63070	35	15	11
63170	101	52	18		63170	57	33	16		63170	36	14	14
63270	101	58	22		63270	57	37	14		63270	37	16	11
63370	95	61	24		63370	57	38	17		63370	43	14	11
63470	101	53	23		63470	58	41	17		63470	41	17	11
63570	92	58	25		63570	55	35	17		63570	37	17	13
63670	95	56	24		63670	53	36	13		63670	37	18	12
63770	94	50	17		63770	57	39	16		63770	34	12	10
63870	107	52	22		63870	58	40	17		63870	35	16	13
63970	98	53	24		63970	58	36	16		63970	34	13	12
64070	100	57	25		64070	56	34	12		64070	34	16	10
64170	98	56	26		64170	62	35	15		64170	37	15	11
64270	91	50	23		64270	52	35	15		64270	36	12	9
64370	94	49	21		64370	57	40	16		64370	36	16	12
64470	93	53	26		64470	61	38	14		64470	37	13	12
64570	97	56	23		64570	56	33	16		64570	35	13	10
64670	98	61	23		64670	57	35	16		64670	35	17	10
64770	95	53	21		64770	55	36	12		64770	40	16	10
64870	87	53	22		64870	55	32	14		64870	38	15	12
64970	98	49	22		64970	58	39	16		64970	34	16	9
65070	92	49	20		65070	57	33	15		65070	32	14	12
65170	91	50	21		65170	55	37	15		65170	35	12	12
65270	98	54	23		65270	55	41	13		65270	37	15	10
65370	97	51	22		65370	54	33	14		65370	38	11	9
65470	89	50	22		65470	57	35	17		65470	37	13	12
65570	83	50	23		65570	57	33	18		65570	35	17	11
65670	90	53	24		65670	46	33	17		65670	37	12	11
65770	95	48	21		65770	51	36	16		65770	38	14	9
65870	89	54	21		65870	61	36	14		65870	36	13	12
65970	90	51	21		65970	56	34	17		65970	38	15	10
66070	90	43	21		66070	48	33	16		66070	37	14	8
66170	92	52	23		66170	59	33	19		66170	37	11	11
66270	89	58	23		66270	54	31	11		66270	35	14	14
66370	85	50	22		66370	59	36	15		66370	35	14	12
66470	94	44	23		66470	56	33	12		66470	35	15	12
66570	87	49	25		66570	56	32	15		66570	33	15	11
66670	84	53	21		66670	54	32	12		66670	36	15	11
66770	89	47	18		66770	50	34	16		66770	38	12	11
66870	87	47	21		66870	53	31	16		66870	35	15	14
66970	91	49	21		66970	51	34	15		66970	33	13	11
67070	91	47	18		67070	52	30	14		67070	33	11	11
67170	92	53	21		67170	57	33	15		67170	31	15	13
67270	91	42	20		67270	51	32	11		67270	28	12	10
67370	96	46	20		67370	55	37	12		67370	32	12	11
67470	88	45	20		67470	52	38	17		67470	32	15	11
67570	83	46	22		67570	53	35	13		67570	35	12	12
67670	86	48	21		67670	54	34	14		67670	34	16	10
67770	88	51	20		67770	54	31	14		67770	34	16	12
67870	89	55	22		67870	55	34	13		67870	34	12	12
67970	85	47	21		67970	47	32	14		67970	34	13	11
68070	89	41	16		68070	49	34	13		68070	31	12	10
68170	93	45	16		68170	54	36	11		68170	37	17	10
68270	89	45	22		68270	58	31	15		68270	35	13	10
68370	88	49	22		68370	45	35	16		68370	35	12	10
68470	90	44	18		68470	54	31	14		68470	31	14	13
68570	89	48	18		68570	55	31	14		68570	35	11	9
68670	89	48	18		68670	51	28	13		68670	32	14	7
68770	83	40	22		68770	53	31	10		68770	32	14	10
68870	91	47	22		68870	54	33	12		68870	28	11	10
68970	82	46	19		68970	52	30	13		68970	36	13	9
69070	83	52	19		69070	53	32	15		69070	32	10	10
69170	83	48	20		69170	53	29	14		69170	36	13	11
69270	79	44	19		69270	47	33	14		69270	30	13	10
69370	91	45	19		69370	54	33	14		69370	30	12	11
69470	80	44	21		69470	50	34	14		69470	34	16	12
69570	88	41	24		69570	51	32	14		69570	32	12	11
69670	74	46	20		69670	51	38	13		69670	31	14	12
69770	90	50	19		69770	51	31	16		69770	33	10	8
69870	73	42	17		69870	50	31	14		69870	35	12	10
69970	75	43	18		69970	45	35	12		69970	27	13	11
70070	82	50	20		70070	53	30	13		70070	35	12	11
70170	80	42	22		70170	51	28	14		70170	35	13	10
70270	78	45	21		70270	53	32	13		70270	31	11	11
70370	83	42	18		70370	51	28	15		70370	32	10	13
70470	84	39	20		70470	51	33	15		70470	30	9	12
70570	86	43	17		70570	49	33	11		70570	30	12	10
70670	79	46	17		70670	50	29	10		70670	33	9	8
70770	76	40	21		70770	50	29	13		70770	32	11	9
70870	86	49	22		70870	46	35	13		70870	31	10	13
70970	77	40	19		70970	53	33	10		70970	28	14	10
71070	76	50	20		71070	46	29	14		71070	37	10	9
71170	80	43	18		71170	47	29	13		71170	34	13	9
71270	79	42	17		71270	47	24	14		71270	34	9	10
71370	81	43	20		71370	46	29	10		71370	30	14	13
71470	75	40	18		71470	46	31	15		71470	31	12	9
71570	77	41	21		71570	53	26	11		71570	31	13	10
71670	75	41	18		71670	50	29	13		71670	34	8	11
71770	80	44	20		71770	52	29	13		71770	33	14	11
71870	77	46	22		71870	51	26	12		71870	31	12	11
71970	72	45	20		71970	54	33	13		71970	29	11	10
72070	82	40	21		72070	51	28	16		72070	32	11	11
72170	73	47	19		72170	44	28	11		72170	26	10	10
72270	83	43	16		72270	47	28	13		72270	29	11	12
72370	78	44	17		72370	45	29	11		72370	28	11	11
72470	77	43	22		72470	51	29	13		72470	35	10	10
72570	74	42	18		72570	43	28	12		72570	28	8	7
72670	85	41	17		72670	45	26	13		72670	25	11	9
72770	76	43	17		72770	52	29	14		72770	29	11	12
72870	73	40	18		72870	45	29	15		72870	32	11	9
72970	72	44	21		72970	42	28	13		72970	27	11	9
73070	85	43	20		73070	45	33	13		73070	27	10	10
73170	74	41	19		73170	47	25	11		73170	31	14	10
73270	77	41	19		73270	54	29	11		73270	26	12	9
73370	77	40	17		73370	44	31	14		73370	32	10	8
73470	75	41	18		73470	42	28	12		73470	26	9	10
73570	74	36	20		73570	51	25	10		73570	30	12	11
73670	80	36	19		73670	46	28	14		73670	32	11	11
73770	82	42	20		73770	43	26	14		73770	31	13	11
73870	76	37	19		73870	41	27	11		73870	32	10	8
73970	69	36	18		73970	43	29	13		73970	31	10	12
74070	71	38	22		74070	47	28	13		74070	26	10	10
74170	71	35	16		74170	47	25	11		74170	28	13	11
74270	76	39	18		74270	48	27	9		74270	25	11	13
74370	70	36	18		74370	49	21	11		74370	27	13	12
74470	76	37	21		74470	45	25	12		74470	32	12	10
74570	75	33	16		74570	43	28	11		74570	30	11	9
74670	69	32	16		74670	44	26	13		74670	32	11	11
74770	70	40	16		74770	42	28	9		74770	27	11	10
74870	72	38	20		74870	48	25	10		74870	25	10	10
74970	70	37	19		74970	49	29	11		74970	28	9	13
75070	68	35	16		75070	48	21	10		75070	24	11	9
75170	71	41	21		75170	47	26	12		75170	29	11	10
75270	77	40	20		75270	43	24	12		75270	34	8	10
75370	75	37	17		75370	43	25	12		75370	31	7	13
75470	67	37	18		75470	49	25	11		75470	28	9	9
75570	72	39	16		75570	49	25	11		75570	29	12	11
75670	75	40	20		75670	39	22	11		75670	32	9	11
75770	69	38	16		75770	45	25	13		75770	27	11	10
75870	66	39	19		75870	41	29	14		75870	23	10	10
75970	69	35	19		75970	46	25	12		75970	28	11	9
76070	63	37	15		76070	39	30	14		76070	28	9	12
76170	68	37	18		76170	50	28	9		76170	30	11	10
76270	70	37	18		76270	47	24	9		76270	27	11	11
76370	77	34	17		76370	43	25	11		76370	29	9	11
76470	69	40	17		76470	51	24	12		76470	31	11	11
76570	65	33	16		76570	48	21	9		76570	27	11	9
76670	70	34	20		76670	49	23	12		76670	27	11	12
76770	62	35	19		76770	43	26	11		76770	23	13	12
76870	72	33	16		76870	40	23	12		76870	29	8	10
76970	67	32	18		76970	45	25	11		76970	27	10	9
77070	72	32	17		77070	48	23	13		77070	28	8	10
77170	71	31	13		77170	45	24	10		77170	28	9	11
77270	73	30	18		77270	44	27	9		77270	29	10	10
77370	73	31	19		77370	42	24	12		77370	24	10	7
77470	70	36	20		77470	45	26	11		77470	31	12	10
77570	68	36	17		77570	39	23	13		77570	25	11	11
77670	75	33	16		77670	41	24	11		77670	28	10	8
77770	66	33	16		77770	46	24	10		77770	24	10	8
77870	72	32	15		77870	43	26	12		77870	26	10	14
77970	72	32	16		77970	40	26	11		77970	26	10	10
78070	69	35	19		78070	47	24	12		78070	27	11	8
78170	71	35	16		78170	43	24	10		78170	25	9	11
78270	61	36	16		78270	45	25	12		78270	28	10	9
78370	62	32	15		78370	47	23	12		78370	29	9	10
78470	64	35	16		78470	42	22	11		78470	27	10	10
78570	71	33	16		78570	40	24	10		78570	28	10	10
78670	66	34	21		78670	41	20	13		78670	23	12	11
78770	66	32	15		78770	44	27	9		78770	30	8	10
78870	66	34	21		78870	49	26	13		78870	25	10	10
78970	65	32	17		78970	41	20	12		78970	25	10	9
79070	65	34	18		79070	44	26	10		79070	30	9	10
79170	66	36	17		79170	47	23	10		79170	27	10	8
79270	64	37	18		79270	46	22	13		79270	27	10	6
79370	76	30	14		79370	41	19	8		79370	24	11	9
79470	66	28	16		79470	42	20	9		79470	23	9	9
79570	63	34	18		79570	44	24	11		79570	23	8	12
79670	71	37	16		79670	40	24	10		79670	23	11	8
79770	61	29	18		79770	39	21	11		79770	23	11	7
79870	70	33	14		79870	39	20	11		79870	26	10	8
79970	68	29	16		79970	38	23	7		79970	29	12	7
80070	59	32	17		80070	39	23	10		80070	30	9	10
80170	68	31	16		80170	49	21	10		80170	26	11	9
80270	68	32	17		80270	43	22	13		80270	27	10	9
80370	68	28	18		80370	41	24	13		80370	27	9	9
80470	66	28	16		80470	42	20	10		80470	28	9	10
80570	70	29	17		80570	41	23	10		80570	24	10	12
80670	67	33	15		80670	38	27	10		80670	27	10	8
80770	63	31	14		80770	44	24	12		80770	23	7	11
80870	68	34	17		80870	38	21	12		80870	22	11	10
80970	63	31	14		80970	44	20	10		80970	30	9	10
81070	62	33	16		81070	48	21	10		81070	26	8	8
81170	59	29	16		81170	42	21	9		81170	24	9	8
81270	65	31	13		81270	41	23	9		81270	26	9	11
81370	68	30	17		81370	38	23	11		81370	27	9	6
81470	66	32	11		81470	40	20	10		81470	25	8	9
81570	60	31	16		81570	42	22	13		81570	24	9	11
81670	68	27	16		81670	43	18	11		81670	23	7	9
81770	64	27	18		81770	40	23	11		81770	26	8	10
81870	58	29	18		81870	36	19	14		81870	23	11	10
81970	58	28	19		81970	36	24	11		81970	27	8	9
82070	68	27	16		82070	41	20	11		82070	22	8	12
82170	69	31	14		82170	40	21	9		82170	25	11	10
82270	68	30	15		82270	35	20	13		82270	23	8	9
82370	66	32	17		82370	38	24	11		82370	28	8	7
82470	62	29	14		82470	39	23	10		82470	22	7	9
82570	64	29	13		82570	40	22	9		82570	22	7	9
82670	67	26	15		82670	48	24	9		82670	26	9	9
82770	62	29	18		82770	39	21	10		82770	26	9	9
82870	65	29	14		82870	41	20	9		82870	25	9	8
82970	65	31	16		82970	40	18	11		82970	24	7	7
83070	59	31	14		83070	36	21	10		83070	26	9	8
83170	67	29	14		83170	36	22	12		83170	25	11	10
83270	58	32	14		83270	38	16	12		83270	24	8	10
83370	59	32	15		83370	37	23	11		83370	23	8	10
83470	65	25	14		83470	42	21	9		83470	24	12	11
83570	58	29	18		83570	39	23	10		83570	22	7	12
83670	63	30	15		83670	33	23	9		83670	26	10	9
83770	63	25	16		83770	36	20	10		83770	26	8	10
83870	67	27	16		83870	38	23	9		83870	22	11	8
83970	62	27	18		83970	41	16	11		83970	27	8	11
84070	59	28	15		84070	39	18	9		84070	18	8	10
84170	60	25	13		84170	39	18	8		84170	20	8	8
84270	60	30	17		84270	37	19	8		84270	25	8	12
84370	64	29	15		84370	39	24	11		84370	22	7	7
84470	62	26	13		84470	34	18	9		84470	25	6	10
84570	58	30	19		84570	39	20	10		84570	23	8	10
84670	63	23	16		84670	34	17	10		84670	21	10	11
84770	60	28	16		84770	42	19	10		84770	23	7	11
84870	61	25	16		84870	37	20	8		84870	27	10	12
84970	56	27	17		84970	36	18	10		84970	23	8	9
85070	56	32	18		85070	36	19	12		85070	27	7	9
85170	60	28	15		85170	41	20	8		85170	21	6	9
85270	63	28	18		85270	39	21	10		85270	23	10	10
85370	63	26	18		85370	35	20	10		85370	20	9	8
85470	59	27	16		85470	40	22	7		85470	26	9	9
85570	61	30	14		85570	35	19	8		85570	18	9	8
85670	61	28	17		85670	38	21	8		85670	23	9	7
85770	49	26	16		85770	35	19	10		85770	27	8	8
85870	56	22	12		85870	36	17	7		85870	22	8	9
85970	59	29	13		85970	41	22	11		85970	19	7	9
86070	56	28	14		86070	35	19	10		86070	27	7	9
86170	63	25	13		86170	38	19	10		86170	22	9	7
86270	61	25	15		86270	37	22	8		86270	17	8	9
86370	68	28	14		86370	38	15	10		86370	24	10	9
86470	58	27	16		86470	39	17	12		86470	24	6	9
86570	58	29	13		86570	37	19	9		86570	22	8	8
86670	57	25	13		86670	31	20	10		86670	21	13	9
86770	55	29	16		86770	32	18	13		86770	28	8	6
86870	55	27	17		86870	35	19	8		86870	24	8	12
86970	56	28	15		86970	38	19	9		86970	21	9	6
87070	51	23	14		87070	35	15	11		87070	24	7	9
87170	54	24	16		87170	36	18	10		87170	21	9	8
87270	51	25	17		87270	36	18	9		87270	19	7	10
87370	57	27	14		87370	31	22	11		87370	23	9	8
87470	60	22	13		87470	36	19	10		87470	22	7	9
87570	50	26	15		87570	36	20	10		87570	20	6	6
87670	60	24	12		87670	35	18	10		87670	22	8	8
87770	56	27	13		87770	39	19	10		87770	20	7	10
87870	62	26	14		87870	35	17	9		87870	24	11	10
87970	54	23	14		87970	37	20	10		87970	23	8	8
88070	54	26	12		88070	40	17	10		88070	23	10	9
88170	57	22	15		88170	40	15	8		88170	22	8	9
88270	58	23	17		88270	35	16	9		88270	21	7	9
88370	55	27	14		88370	38	17	11		88370	23	7	9
88470	52	23	16		88470	33	20	9		88470	21	9	6
88570	60	22	17		88570	33	16	8		88570	23	9	8
88670	54	26	12		88670	34	17	10		88670	20	11	9
88770	53	25	18		88770	34	18	12		88770	20	7	10
88870	52	27	14		88870	37	16	9		88870	19	6	9
88970	61	25	14		88970	35	16	10		88970	24	6	9
89070	59	21	14		89070	39	18	8		89070	20	9	8
89170	58	26	15		89170	33	14	11		89170	20	11	8
89270	59	28	13		89270	37	16	10		89270	22	7	9
89370	53	24	12		89370	37	19	10		89370	23	8	8
89470	56	25	13		89470	39	20	7		89470	20	7	9
89570	49	28	13		89570	37	18	12		89570	20	9	12
89670	53	24	12		89670	32	21	11		89670	18	6	11
89770	52	26	15		89770	42	18	9		89770	16	8	10
89870	57	23	15		89870	33	17	8		89870	19	8	9
89970	53	25	15		89970	37	18	10		89970	23	6	7
90070	57	25	15		90070	32	17	8		90070	20	9	8
90170	56	20	15		90170	33	17	7		90170	23	8	7
90270	56	24	14		90270	36	16	9		90270	24	8	7
90370	55	21	15		90370	34	17	8		90370	21	9	9
90470	54	26	11		90470	36	20	9		90470	24	7	9
90570	52	23	15		90570	35	15	8		90570	23	9	10
90670	51	22	16		90670	35	17	11		90670	22	6	9
90770	48	25	15		90770	35	16	9		90770	19	7	8
90870	53	23	15		90870	32	16	7		90870	17	7	11
90970	56	23	15		90970	38	17	11		90970	21	7	10
91070	56	19	14		91070	37	14	9		91070	20	6	9
91170	50	22	17		91170	35	16	10		91170	23	8	9
91270	54	21	15		91270	25	18	7		91270	20	6	7
91370	55	24	16		91370	39	15	7		91370	19	10	11
91470	56	25	14		91470	34	21	9		91470	20	10	7
91570	60	23	16		91570	35	16	11		91570	21	7	8
91670	54	23	12		91670	35	15	9		91670	20	8	9
91770	46	21	16		91770	31	15	9		91770	17	6	11
91870	59	20	12		91870	37	16	9		91870	20	7	8
91970	52	23	15		91970	31	20	9		91970	19	8	8
92070	50	23	15		92070	31	15	9		92070	20	6	9
92170	50	22	14		92170	36	17	8		92170	19	5	9
92270	54	24	15		92270	30	15	10		92270	20	8	10
92370	50	23	15		92370	37	15	11		92370	19	7	7
92470	51	22	13		92470	29	14	9		92470	20	9	9
92570	47	23	16		92570	28	14	11		92570	21	6	11
92670	53	21	17		92670	33	20	8		92670	21	7	7
92770	46	24	14		92770	29	12	10		92770	20	8	9
92870	51	24	18		92870	30	14	9		92870	20	8	8
92970	51	19	11		92970	29	11	9		92970	18	6	10
93070	47	20	13		93070	34	17	9		93070	21	8	11
93170	50	23	18		93170	33	15	7		93170	15	6	11
93270	50	22	14		93270	34	18	11		93270	20	7	10
93370	52	21	16		93370	36	20	7		93370	17	6	6
93470	49	21	15		93470	31	16	8		93470	18	7	9
93570	49	19	14		93570	31	15	9		93570	16	7	9
93670	54	20	14		93670	36	13	9		93670	17	5	7
93770	52	18	17		93770	27	15	8		93770	19	10	8
93870	51	21	16		93870	28	15	9		93870	21	8	9
93970	50	21	14		93970	40	17	11		93970	19	7	8
94070	50	21	11		94070	32	15	8		94070	21	8	8
94170	50	22	13		94170	29	17	10		94170	20	5	6
94270	48	22	18		94270	33	13	9		94270	22	7	9
94370	47	23	10		94370	34	14	9		94370	19	6	10
94470	53	21	15		94470	28	13	7		94470	20	5	9
94570	46	18	15		94570	34	16	7		94570	16	8	7
94670	44	22	13		94670	34	13	10		94670	18	8	9
94770	46	21	14		94770	34	14	9		94770	17	8	7
94870	45	19	13		94870	31	14	6		94870	20	8	10
94970	53	21	17		94970	31	12	7		94970	15	4	7
95070	53	23	15		95070	33	14	7		95070	19	6	8
95170	43	20	13		95170	32	15	9		95170	17	6	10
95270	44	19	15		95270	30	15	8		95270	16	7	8
95370	52	23	14		95370	32	15	9		95370	19	6	8
95470	52	21	13		95470	34	18	8		95470	18	6	9
95570	52	20	15		95570	34	12	9		95570	19	5	8
95670	50	18	13		95670	32	14	8		95670	17	9	10
95770	46	17	12		95770	33	14	8		95770	19	6	9
95870	52	18	14		95870	31	14	9		95870	19	7	9
95970	53	23	14		95970	28	17	9		95970	18	7	10
96070	48	20	13		96070	33	14	8		96070	19	7	8
96170	43	19	15		96170	33	11	8		96170	16	7	7
96270	46	17	15		96270	27	15	8		96270	16	7	9
96370	47	16	14		96370	27	11	8		96370	15	6	9
96470	49	20	19		96470	31	16	8		96470	21	6	9
96570	41	24	14		96570	32	15	8		96570	21	9	7
96670	49	24	11		96670	32	16	7		96670	15	8	10
96770	45	20	14		96770	31	15	10		96770	19	5	8
96870	42	21	15		96870	32	17	10		96870	19	6	9
96970	45	18	12		96970	32	15	12		96970	18	7	7
97070	50	18	14		97070	30	13	11		97070	18	8	8
97170	44	20	13		97170	30	13	7		97170	20	8	8
97270	47	25	14		97270	29	16	6		97270	17	6	8
97370	50	19	15		97370	27	17	8		97370	17	7	9
97470	47	24	13		97470	36	16	7		97470	17	7	10
97570	47	21	13		97570	33	11	8		97570	18	8	7
97670	46	19	13		97670	29	15	7		97670	18	7	9
97770	44	19	15		97770	30	13	9		97770	18	4	10
97870	49	20	15		97870	30	13	6		97870	17	6	7
97970	41	24	15		97970	27	18	9		97970	21	6	7
98070	42	21	14		98070	29	15	10		98070	16	6	9
98170	43	18	16		98170	28	13	10		98170	18	7	10
98270	46	22	15		98270	24	15	9		98270	18	6	10
98370	43	17	13		98370	33	15	8		98370	14	8	10
98470	48	16	13		98470	33	13	6		98470	16	6	7
98570	48	19	14		98570	33	12	9		98570	17	7	8
98670	40	16	12		98670	29	16	11		98670	17	4	6
98770	43	21	15		98770	29	12	9		98770	18	7	10
98870	47	20	13		98870	32	15	10		98870	17	5	8
98970	46	18	14		98970	30	14	6		98970	15	5	8
99070	41	18	14		99070	31	13	7		99070	15	7	7
99170	49	17	12		99170	31	14	10		99170	17	6	9
99270	42	18	16		99270	28	15	9		99270	17	7	7
99370	43	18	13		99370	29	19	9		99370	19	7	7
99470	45	22	13		99470	27	12	10		99470	19	9	8
99570	45	20	14		99570	30	12	8		99570	16	6	9
99670	51	17	14		99670	27	13	8		99670	15	5	10
99770	46	14	14		99770	31	15	7		99770	16	6	8
99870	41	20	13		99870	27	14	8		99870	14	7	7
99970	44	18	14		99970	29	13	9		99970	15	7	7
100070	50	20	12		100070	31	13	8		100070	17	6	11
100170	43	17	12		100170	25	14	8		100170	15	7	8
100270	38	17	12		100270	30	12	10		100270	18	6	10
100370	40	20	14		100370	28	15	9		100370	15	7	7
100470	48	20	16		100470	28	13	7		100470	15	5	9
100570	43	13	14		100570	28	12	8		100570	17	7	7
100670	43	21	14		100670	32	13	5		100670	15	7	7
100770	46	19	12		100770	30	14	8		100770	17	7	6
100870	40	16	13		100870	26	13	8		100870	18	6	9
100970	36	21	13		100970	27	14	8		100970	16	4	8
101070	41	19	11		101070	29	12	8		101070	14	6	7
101170	40	18	13		101170	31	12	11		101170	15	6	10
101270	44	18	13		101270	30	13	8		101270	17	6	8
101370	48	16	13		101370	31	12	9		101370	18	5	9
101470	39	18	14		101470	25	13	6		101470	17	6	9
101570	39	17	13		101570	29	17	7		101570	16	5	8
101670	40	17	14		101670	29	13	8		101670	15	6	10
101770	39	17	12		101770	27	13	7		101770	17	6	9
101870	45	17	13		101870	27	12	8		101870	15	6	7
101970	43	17	10		101970	25	10	9		101970	18	6	9
102070	48	18	11		102070	28	11	8		102070	15	5	8
102170	41	18	10		102170	30	13	8		102170	16	7	7
102270	41	17	12		102270	30	13	7		102270	17	6	11
102370	44	17	15		102370	29	12	9		102370	16	8	9
102470	36	20	9		102470	31	13	7		102470	16	5	9
102570	45	18	12		102570	31	13	6		102570	16	4	8
102670	45	16	16		102670	26	10	8		102670	15	6	8
102770	41	15	11		102770	31	12	7		102770	17	7	9
102870	38	17	12		102870	28	13	8		102870	14	8	8
102970	39	18	14		102970	26	14	6		102970	17	6	8
103070	48	18	15		103070	25	14	7		103070	18	6	5
103170	40	18	13		103170	25	11	9		103170	16	5	8
103270	39	18	14		103270	25	15	6		103270	14	6	8
103370	38	17	10		103370	25	10	9		103370	15	5	8
103470	43	18	14		103470	27	13	7		103470	15	5	8
103570	38	19	12		103570	26	12	9		103570	17	6	9
103670	40	16	12		103670	29	12	9		103670	14	4	8
103770	45	16	16		103770	27	13	8		103770	15	6	9
103870	40	18	11		103870	26	13	7		103870	16	7	9
103970	37	18	13		103970	27	9	7		103970	16	7	9
104070	40	15	12		104070	31	12	7		104070	16	7	9
104170	35	18	12		104170	23	8	9		104170	13	5	10
104270	38	13	14		104270	27	13	8		104270	15	5	8
104370	41	18	13		104370	30	13	7		104370	16	6	7
104470	44	16	13		104470	26	10	7		104470	14	7	8
104570	42	16	9		104570	31	12	7		104570	14	8	9
104670	42	15	15		104670	28	12	9		104670	13	8	11
104770	44	16	12		104770	25	14	9		104770	15	5	8
104870	44	15	14		104870	30	11	8		104870	15	7	9
104970	40	15	9		104970	26	13	8		104970	12	7	11
105070	43	16	15		105070	25	13	7		105070	14	6	10
105170	37	16	12		105170	23	13	8		105170	16	7	9
105270	41	18	15		105270	28	11	8		105270	13	5	9
105370	43	19	11		105370	23	13	10		105370	16	5	9
105470	41	17	13		105470	25	11	8		105470	14	6	8
105570	41	15	14		105570	27	10	6		105570	16	8	8
105670	33	17	12		105670	26	13	6		105670	14	6	8
105770	41	14	14		105770	29	13	7		105770	12	7	9
105870	37	17	15		105870	24	11	7		105870	15	7	9
105970	43	14	11		105970	25	10	8		105970	13	5	9
106070	41	16	14		106070	27	13	8		106070	16	7	9
106170	37	16	13		106170	24	11	7		106170	13	7	10
106270	35	13	12		106270	28	14	9		106270	12	5	10
106370	39	16	13		106370	24	11	8		106370	12	7	7
106470	43	18	10		106470	24	12	7		106470	14	4	8
106570	40	17	12		106570	27	14	9		106570	16	5	10
106670	44	16	12		106670	23	11	6		106670	15	5	8
106770	40	13	12		106770	22	11	9		106770	14	5	8
106870	34	14	11		106870	24	9	7		106870	19	7	11
106970	38	18	15		106970	26	11	9		106970	16	5	8
107070	39	14	16		107070	25	11	9		107070	16	5	6
107170	35	15	12		107170	19	11	7		107170	16	6	10
107270	38	15	13		107270	30	10	6		107270	14	6	8
107370	40	17	12		107370	24	8	9		107370	13	7	7
107470	35	17	15		107470	23	10	8		107470	12	4	7
107570	38	13	14		107570	26	11	6		107570	12	4	10
107670	40	16	11		107670	25	10	7		107670	12	6	8
107770	39	15	11		107770	27	10	7		107770	14	4	9
107870	38	15	13		107870	28	10	6		107870	16	6	10
107970	33	14	11		107970	22	12	8		107970	12	6	8
108070	35	17	12		108070	25	11	7		108070	17	5	10
108170	43	16	11		108170	23	12	7		108170	15	6	10
108270	38	16	12		108270	23	9	8		108270	14	7	8
108370	39	13	14		108370	24	12	8		108370	13	6	7
108470	37	12	10		108470	26	12	8		108470	9	5	9
108570	38	14	13		108570	26	13	9		108570	10	5	9
108670	39	17	14		108670	23	10	8		108670	15	4	7
108770	40	19	13		108770	27	12	8		108770	15	5	6
108870	34	18	14		108870	26	10	7		108870	15	4	10
108970	39	17	12		108970	28	8	6		108970	14	6	9
109070	39	15	12		109070	27	11	8		109070	18	6	9
109170	38	14	11		109170	24	11	7		109170	14	7	7
109270	38	14	14		109270	21	10	8		109270	14	5	8
109370	34	17	13		109370	25	9	8		109370	14	6	8
109470	33	14	14		109470	24	10	8		109470	13	4	8
109570	33	15	12		109570	25	10	9		109570	14	6	7
109670	43	14	12		109670	25	11	9		109670	13	9	8
109770	32	15	15		109770	25	11	9		109770	13	6	9
109870	38	12	14		109870	27	13	5		109870	16	5	7
109970	32	13	12		109970	22	12	8		109970	14	6	9
110070	33	16	11		110070	25	12	8		110070	16	7	7
110170	42	15	13		110170	24	10	7		110170	13	7	8
110270	40	16	10		110270	18	12	7		110270	12	5	7
110370	39	16	14		110370	26	9	8		110370	12	5	7
110470	36	14	12		110470	23	12	8		110470	15	6	8
110570	34	14	12		110570	26	11	5		110570	12	6	6
110670	36	18	12		110670	27	10	8		110670	13	4	8
110770	31	13	12		110770	26	10	7		110770	16	7	9
110870	35	14	12		110870	25	11	7		110870	14	6	7
110970	31	16	14		110970	24	13	8		110970	15	6	10
111070	30	12	13		111070	24	10	7		111070	14	6	8
111170	38	15	14		111170	25	10	9		111170	11	5	7
111270	35	13	15		111270	23	10	8		111270	18	4	8
111370	37	11	13		111370	25	12	6		111370	13	5	7
111470	38	14	9		111470	19	10	5		111470	15	6	7
111570	35	14	12		111570	21	9	9		111570	16	5	8
111670	36	15	15		111670	27	8	8		111670	16	7	8
111770	35	14	12		111770	26	11	7		111770	15	3	7
111870	35	15	13		111870	23	8	9		111870	11	5	7
111970	38	13	14		111970	24	11	7		111970	14	6	9
112070	34	13	12		112070	20	11	6		112070	16	6	8
112170	34	11	12		112170	22	11	6		112170	14	4	8
112270	33	18	15		112270	17	11	7		112270	14	5	8
112370	36	12	14		112370	24	11	7		112370	12	5	9
112470	35	13	14		112470	21	11	7		112470	14	4	6
112570	34	12	12		112570	23	8	9		112570	12	5	8
112670	38	16	12		112670	24	12	7		112670	16	5	10
112770	33	15	12		112770	23	12	7		112770	11	7	9
112870	33	14	10		112870	21	10	7		112870	14	5	8
112970	31	14	15		112970	24	10	7		112970	14	5	5
113070	37	14	12		113070	24	10	7		113070	13	6	8
113170	35	15	15		113170	23	11	10		113170	13	7	9
113270	36	13	12		113270	26	11	6		113270	12	4	7
113370	35	13	14		113370	21	10	7		113370	16	6	8
113470	35	15	10		113470	24	8	7		113470	12	5	10
113570	35	13	12		113570	25	11	7		113570	13	6	6
113670	31	15	16		113670	22	10	6		113670	11	4	9
113770	33	13	13		113770	22	10	10		113770	13	5	8
113870	32	17	12		113870	27	9	6		113870	11	5	9
113970	36	15	12		113970	24	9	9		113970	13	7	6
114070	34	15	14		114070	24	11	7		114070	13	4	8
114170	33	14	14		114170	23	12	9		114170	14	6	8
114270	35	14	13		114270	23	11	8		114270	13	6	7
114370	29	12	14		114370	28	8	6		114370	12	4	7
114470	31	11	13		114470	22	9	7		114470	13	6	9
114570	36	15	12		114570	21	8	8		114570	11	4	8
114670	35	14	12		114670	25	10	8		114670	14	5	9
114770	27	12	12		114770	25	13	7		114770	14	4	7
114870	32	14	15		114870	18	10	8		114870	11	5	8
114970	32	13	13		114970	23	8	7		114970	11	5	9
115070	35	13	10		115070	23	10	7		115070	15	4	7
115170	36	13	12		115170	23	11	7		115170	14	4	9
115270	30	13	10		115270	22	8	8		115270	15	6	8
115370	31	15	12		115370	22	11	7		115370	14	7	9
115470	34	16	13		115470	19	12	5		115470	10	9	9
115570	30	12	11		115570	25	8	8		115570	12	7	6
115670	28	12	12		115670	22	10	9		115670	11	6	10
115770	34	13	12		115770	23	11	12		115770	14	5	7
115870	32	16	13		115870	22	8	6		115870	12	4	7
115970	33	13	12		115970	20	8	8		115970	12	7	10
116070	26	13	13		116070	25	9	8		116070	13	5	10
116170	35	13	13		116170	21	13	8		116170	12	7	7
116270	31	14	11		116270	19	8	10		116270	14	4	9
116370	30	12	11		116370	23	7	5		116370	13	7	8
116470	34	12	13		116470	21	12	6		116470	10	5	9
116570	37	11	13		116570	23	9	7		116570	12	4	6
116670	31	12	14		116670	21	10	6		116670	13	6	9
116770	31	12	14		116770	24	8	9		116770	15	5	6
116870	37	12	15		116870	24	8	8		116870	11	6	8
116970	32	14	13		116970	19	7	9		116970	9	2	7
117070	33	12	13		117070	24	9	7		117070	15	5	8
117170	35	16	10		117170	21	9	8		117170	14	4	6
117270	33	15	13		117270	20	7	7		117270	14	6	9
117370	32	15	13		117370	22	10	7		117370	13	6	9
117470	33	12	13		117470	23	11	6		117470	13	6	9
117570	31	12	11		117570	23	8	7		117570	11	3	7
117670	31	11	11		117670	18	9	6		117670	12	5	6
117770	35	13	12		117770	21	13	8		117770	13	4	10
117870	32	11	11		117870	24	9	7		117870	11	4	9
117970	31	12	13		117970	24	10	7		117970	13	4	9
118070	30	15	11		118070	23	12	8		118070	13	7	7
118170	30	14	13		118170	23	11	7		118170	12	4	8
118270	39	11	14		118270	22	10	9		118270	13	5	10
118370	32	13	16		118370	24	9	6		118370	13	5	6
118470	30	12	13		118470	18	8	9		118470	11	5	8
118570	35	11	12		118570	16	9	8		118570	12	5	7
118670	30	14	15		118670	20	9	6		118670	12	5	7
118770	30	12	10		118770	21	9	8		118770	13	6	8
118870	28	13	14		118870	19	9	9		118870	12	5	7
118970	35	11	13		118970	23	10	6		118970	11	5	8
119070	27	14	12		119070	20	9	9		119070	11	5	6
119170	29	12	11		119170	18	10	9		119170	10	6	7
119270	32	14	14		119270	21	7	9		119270	8	5	8
119370	34	12	12		119370	23	5	8		119370	11	5	9
119470	28	11	12		119470	21	8	7		119470	12	5	7
119570	31	10	11		119570	21	8	8		119570	11	6	6
119670	28	17	11		119670	21	10	7		119670	14	5	9
119770	33	14	13		119770	23	8	7		119770	10	6	6
119870	31	10	11		119870	21	8	8		119870	13	5	7
119970	31	15	12		119970	22	8	9		119970	10	5	8
120070	34	15	15		120070	21	10	8		120070	9	5	8
120170	27	10	12		120170	17	8	7		120170	12	4	6
120270	32	12	14		120270	22	9	6		120270	10	6	9
120370	32	11	12		120370	20	9	9		120370	11	4	7
120470	28	12	13		120470	17	10	7		120470	12	3	8
120570	30	14	12		120570	22	9	7		120570	11	4	7
120670	30	11	13		120670	21	10	6		120670	13	3	9
120770	29	12	12		120770	18	10	6		120770	12	4	5
120870	32	13	13		120870	20	8	6		120870	11	5	9
120970	30	13	12		120970	21	10	6		120970	14	6	8
121070	32	13	13		121070	19	8	11		121070	11	6	7
121170	32	13	13		121170	23	9	6		121170	12	4	10
121270	31	11	12		121270	21	10	6		121270	11	5	9
121370	28	11	14		121370	23	9	7		121370	9	4	8
121470	30	15	13		121470	21	6	9		121470	11	6	9
121570	34	12	14		121570	17	8	8		121570	12	6	9
121670	30	13	13		121670	20	8	7		121670	16	5	6
121770	26	11	12		121770	23	7	6		121770	11	4	6
121870	28	12	13		121870	22	9	8		121870	10	5	6
121970	27	13	11		121970	24	10	9		121970	10	5	10
122070	25	10	12		122070	20	7	8		122070	11	6	8
122170	30	12	13		122170	19	7	6		122170	10	5	7
122270	28	11	13		122270	22	9	7		122270	12	7	9
122370	32	13	13		122370	20	9	9		122370	12	5	8
122470	26	12	11		122470	23	8	7		122470	9	4	10
122570	26	14	11		122570	16	9	8		122570	12	6	5
122670	31	13	12		122670	17	8	7		122670	10	4	9
122770	28	11	13		122770	18	7	7		122770	11	6	7
122870	30	14	10		122870	17	9	8		122870	10	5	9
122970	27	11	12		122970	18	9	7		122970	12	7	8
123070	28	11	13		123070	20	9	9		123070	13	6	11
123170	30	12	12		123170	20	8	7		123170	11	5	7
123270	37	12	12		123270	18	8	5		123270	13	4	9
123370	31	12	12		123370	18	7	9		123370	13	5	7
123470	28	11	13		123470	25	9	8		123470	12	6	8
123570	27	15	10		123570	16	6	9		123570	10	7	10
123670	30	11	12		123670	18	9	8		123670	11	4	8
123770	30	11	14		123770	22	7	8		123770	13	3	7
123870	26	12	11		123870	20	9	7		123870	14	4	9
123970	28	13	12		123970	19	6	8		123970	11	4	5
124070	30	12	10		124070	17	9	7		124070	11	4	8
124170	29	12	12		124170	20	9	7		124170	10	4	8
124270	30	13	10		124270	19	10	8		124270	11	5	6
124370	33	10	12		124370	20	6	5		124370	10	5	8
124470	29	12	14		124470	18	7	8		124470	11	5	9
124570	25	12	14		124570	20	9	7		124570	12	4	9
124670	23	12	13		124670	16	10	8		124670	12	6	6
124770	27	13	11		124770	20	8	5		124770	13	6	9
124870	29	11	12		124870	19	9	7		124870	10	5	11
124970	29	13	12		124970	18	8	8		124970	8	4	6
125070	34	11	12		125070	18	8	7		125070	8	5	6
125170	29	11	12		125170	18	8	8		125170	10	5	7
125270	25	12	13		125270	19	7	7		125270	11	6	8
125370	26	10	11		125370	16	6	7		125370	10	5	8
125470	27	11	14		125470	16	9	7		125470	13	5	6
125570	24	13	13		125570	18	9	8		125570	10	5	10
125670	29	11	12		125670	20	7	7		125670	11	5	7
125770	25	10	12		125770	18	9	7		125770	11	4	9
125870	26	11	11		125870	18	7	7		125870	9	5	11
125970	26	11	16		125970	23	9	8		125970	11	5	9
126070	30	11	17		126070	18	6	7		126070	11	4	7
126170	30	9	15		126170	15	8	8		126170	11	5	7
126270	27	11	9		126270	19	7	8		126270	9	5	7
126370	32	12	13		126370	21	7	5		126370	10	5	9
126470	28	12	13		126470	19	8	6		126470	12	5	6
126570	30	10	11		126570	17	7	9		126570	11	4	7
126670	27	9	16		126670	20	7	7		126670	11	4	7
126770	29	12	10		126770	20	7	8		126770	10	6	9
126870	24	12	11		126870	18	8	7		126870	11	4	6
126970	29	11	14		126970	17	8	9		126970	10	6	9
127070	28	9	11		127070	22	7	9		127070	8	5	7
127170	28	9	11		127170	17	6	9		127170	9	3	7
127270	27	12	11		127270	17	6	7		127270	9	5	7
127370	32	10	13		127370	16	7	8		127370	8	4	8
127470	28	12	12		127470	17	7	6		127470	11	3	7
127570	22	11	15		127570	19	7	8		127570	10	4	9
127670	27	11	12		127670	22	9	6		127670	10	6	7
127770	29	13	13		127770	18	7	7		127770	11	4	10
127870	25	9	12		127870	19	7	9		127870	8	6	10
127970	22	12	11		127970	18	7	7		127970	10	4	8
128070	28	11	13		128070	18	9	6		128070	10	5	8
128170	25	10	13		128170	19	9	7		128170	10	5	6
128270	24	11	14		128270	17	7	5		128270	9	4	7
128370	26	12	11		128370	19	7	7		128370	10	6	8
128470	25	10	11		128470	20	6	7		128470	7	4	10
128570	22	13	13		128570	17	9	5		128570	10	6	6
128670	26	12	10		128670	17	8	7		128670	10	6	9
128770	22	13	10		128770	16	10	8		128770	10	4	8
128870	25	9	13		128870	19	6	9		128870	7	4	7
128970	27	11	11		128970	19	10	7		128970	9	4	8
129070	30	10	12		129070	17	8	8		129070	8	5	8
129170	27	9	12		129170	18	8	8		129170	9	5	10
129270	26	13	14		129270	18	9	5		129270	10	5	6
129370	20	11	9		129370	18	8	7		129370	13	5	10
129470	25	11	11		129470	17	7	6		129470	9	6	7
129570	27	11	13		129570	19	7	9		129570	10	5	7
129670	26	12	10		129670	18	8	9		129670	9	5	7
129770	28	9	11		129770	19	8	7		129770	10	3	7
129870	24	8	11		129870	14	6	5		129870	10	4	10
129970	29	12	13		129970	18	6	6		129970	9	4	7
130070	24	10	12		130070	18	9	6		130070	10	6	9
130170	25	9	12		130170	18	6	7		130170	10	3	9
130270	23	10	11		130270	16	8	8		130270	10	5	8
130370	26	11	11		130370	19	8	8		130370	9	5	8
130470	27	12	12		130470	17	7	8		130470	10	5	7
130570	25	9	13		130570	16	7	7		130570	8	3	9
130670	24	12	11		130670	18	8	7		130670	8	3	7
130770	25	9	11		130770	14	7	9		130770	10	5	9
130870	21	11	15		130870	18	7	6		130870	8	6	7
130970	27	11	10		130970	17	8	8		130970	8	4	8
131070	23	10	12		131070	15	9	7		131070	9	3	8
131170	27	6	11		131170	20	7	8		131170	11	5	8
131270	27	9	10		131270	18	7	6		131270	10	6	8
131370	24	10	8		131370	17	8	6		131370	7	4	7
131470	23	11	13		131470	16	8	8		131470	11	3	9
131570	22	11	11		131570	15	8	8		131570	10	5	8
131670	25	8	11		131670	19	7	5		131670	9	4	8
131770	24	13	11		131770	17	8	7		131770	10	5	8
131870	24	10	11		131870	17	10	7		131870	11	5	8
131970	23	12	14		131970	17	8	8		131970	9	4	7
132070	26	9	12		132070	17	8	6		132070	8	3	7
132170	24	9	10		132170	18	7	7		132170	11	4	8
132270	29	11	11		132270	16	7	6		132270	11	3	8
132370	22	12	12		132370	17	7	8		132370	10	4	8
132470	20	10	9		132470	20	8	7		132470	11	5	7
132570	23	11	12		132570	15	8	5		132570	10	4	10
132670	21	9	11		132670	18	8	7		132670	8	5	8
132770	20	11	12		132770	17	8	8		132770	8	6	7
132870	25	12	11		132870	17	9	7		132870	11	4	9
132970	28	8	10		132970	13	10	6		132970	9	3	8
133070	25	10	12		133070	19	5	6		133070	8	3	8
133170	22	12	11		133170	19	5	6		133170	10	5	7
133270	23	8	11		133270	16	7	8		133270	10	3	9
133370	29	10	17		133370	17	5	7		133370	10	4	5
133470	28	11	10		133470	21	6	6		133470	12	4	8
133570	23	12	12		133570	19	7	5		133570	9	4	7
133670	29	11	10		133670	17	9	6		133670	12	6	8
133770	23	10	11		133770	14	8	6		133770	7	3	7
133870	24	11	13		133870	16	6	7		133870	7	4	7
133970	26	9	10		133970	15	6	6		133970	8	6	7
134070	23	12	11		134070	19	6	6		134070	9	2	8
134170	22	9	12		134170	18	7	9		134170	8	4	8
134270	26	11	10		134270	18	8	8		134270	9	4	5
134370	20	11	12		134370	16	6	8		134370	7	5	9
134470	26	12	8		134470	21	8	7		134470	8	5	7
134570	22	9	11		134570	18	7	8		134570	9	5	8
134670	26	10	10		134670	18	8	6		134670	10	5	8
134770	25	9	12		134770	18	7	8		134770	10	4	10
134870	27	11	11		134870	18	6	5		134870	10	5	9
134970	27	10	12		134970	20	6	6		134970	9	4	8
135070	24	8	11		135070	15	8	7		135070	11	8	7
135170	25	10	10		135170	18	6	7		135170	11	4	7
135270	22	12	15		135270	18	7	6		135270	6	4	10
135370	23	10	12		135370	17	6	9		135370	9	3	6
135470	27	10	11		135470	16	7	8		135470	11	4	7
135570	21	11	10		135570	14	7	7		135570	9	4	8
135670	22	11	11		135670	20	7	6		135670	9	5	7
135770	23	8	14		135770	15	6	6		135770	9	4	8
135870	18	9	12		135870	16	8	6		135870	12	5	9
135970	22	8	13		135970	15	7	6		135970	10	4	9
136070	27	9	11		136070	15	6	7		136070	9	4	7
136170	24	8	13		136170	16	7	6		136170	10	5	9
136270	22	8	13		136270	13	8	6		136270	9	4	8
136370	24	10	11		136370	17	8	7		136370	9	4	8
136470	21	10	12		136470	18	5	9		136470	8	3	9
136570	22	8	13		136570	21	8	6		136570	9	4	5
136670	24	11	12		136670	15	9	7		136670	10	5	8
136770	21	8	10		136770	18	7	6		136770	5	3	7
136870	24	8	10		136870	18	7	6		136870	8	4	8
136970	25	11	11		136970	16	5	6		136970	10	4	8
137070	23	11	13		137070	16	7	8		137070	8	4	6
137170	22	9	11		137170	16	10	7		137170	8	5	6
137270	22	11	14		137270	15	5	6		137270	10	3	7
137370	23	10	12		137370	16	8	7		137370	9	4	9
137470	28	11	10		137470	16	5	7		137470	9	4	8
137570	23	10	12		137570	20	7	6		137570	8	4	7
137670	27	7	12		137670	14	7	8		137670	8	4	8
137770	22	9	11		137770	15	7	8		137770	7	4	8
137870	25	8	10		137870	15	6	7		137870	8	4	6
137970	27	11	11		137970	15	8	8		137970	7	5	7
138070	22	10	8		138070	16	6	6		138070	8	4	8
138170	27	9	12		138170	16	7	7		138170	8	6	7
138270	21	10	12		138270	13	8	7		138270	9	4	7
138370	21	8	13		138370	15	5	7		138370	8	6	7
138470	26	10	12		138470	16	6	9		138470	7	4	8
138570	22	8	12		138570	17	6	7		138570	7	5	5
138670	18	11	9		138670	15	7	7		138670	9	5	9
138770	19	9	11		138770	18	7	6		138770	9	3	7
138870	19	13	11		138870	15	7	6		138870	8	6	8
138970	26	8	12		138970	17	7	9		138970	10	6	8
139070	22	10	10		139070	14	7	6		139070	10	5	6
139170	27	12	14		139170	12	7	7		139170	6	4	8
139270	24	8	13		139270	19	7	7		139270	8	4	6
139370	23	11	11		139370	14	6	7		139370	9	5	8
139470	22	9	14		139470	16	8	6		139470	10	7	7
139570	23	9	10		139570	13	8	6		139570	9	3	8
139670	23	10	11		139670	14	6	6		139670	9	4	9
139770	22	12	15		139770	13	5	8		139770	9	4	9
139870	25	10	11		139870	15	5	7		139870	9	4	5
139970	25	9	12		139970	16	6	7		139970	9	4	9
140070	21	10	9		140070	18	6	6		140070	9	3	7
140170	22	10	13		140170	15	8	6		140170	8	5	6
140270	22	9	15		140270	14	8	6		140270	10	5	8
140370	24	11	13		140370	14	7	7		140370	9	4	6
140470	22	9	11		140470	15	6	6		140470	10	4	7
140570	23	8	11		140570	17	8	7		140570	10	5	8
140670	20	9	11		140670	15	7	7		140670	8	6	7
140770	23	8	9		140770	11	6	6		140770	6	3	6
140870	25	11	10		140870	15	6	8		140870	8	4	7
140970	22	8	11		140970	17	6	9		140970	10	6	9
141070	23	7	10		141070	15	7	8		141070	11	3	9
141170	24	9	13		141170	16	6	7		141170	7	5	8
141270	21	12	11		141270	15	6	7		141270	11	6	7
141370	19	9	14		141370	16	6	7		141370	11	4	7
141470	22	11	13		141470	14	4	7		141470	8	5	9
141570	24	10	12		141570	14	6	7		141570	8	5	9
141670	20	10	12		141670	16	7	6		141670	7	4	8
141770	19	8	12		141770	16	6	8		141770	8	3	7
141870	20	8	14		141870	15	7	9		141870	7	4	9
141970	23	10	10		141970	17	7	8		141970	7	4	7
142070	18	9	11		142070	14	8	9		142070	8	4	8
142170	19	12	11		142170	15	6	6		142170	7	4	7
142270	26	6	12		142270	15	6	8		142270	9	4	6
142370	25	6	11		142370	14	8	9		142370	7	4	8
142470	22	9	13		142470	12	6	6		142470	12	4	5
142570	19	9	13		142570	14	5	7		142570	8	6	8
142670	18	10	13		142670	15	7	9		142670	7	4	7
142770	19	7	12		142770	17	7	7		142770	8	4	6
142870	17	9	13		142870	14	5	7		142870	9	4	6
142970	18	8	14		142970	17	4	8		142970	9	6	9
143070	21	9	13		143070	16	6	7		143070	7	4	8
143170	19	10	13		143170	16	8	5		143170	7	3	7
143270	23	9	12		143270	16	8	6		143270	9	4	6
143370	19	7	12		143370	13	9	8		143370	7	3	9
143470	20	8	10		143470	15	7	6		143470	7	4	6
143570	18	10	9		143570	14	8	8		143570	8	3	8
143670	22	9	11		143670	13	7	7		143670	9	5	8
143770	18	8	15		143770	15	6	7		143770	9	4	7
143870	19	8	10		143870	13	4	7		143870	9	4	9
143970	19	8	12		143970	14	6	6		143970	10	2	8
144070	22	9	9		144070	16	6	6		144070	8	4	7
144170	21	11	13		144170	16	6	9		144170	10	5	7
144270	22	9	11		144270	14	6	8		144270	8	3	9
144370	19	11	13		144370	16	7	5		144370	6	4	6
144470	20	7	11		144470	12	5	9		144470	8	4	8
144570	23	7	13		144570	14	7	8		144570	9	5	6
144670	20	7	14		144670	16	5	8		144670	8	4	7
144770	20	10	10		144770	15	6	7		144770	9	3	7
144870	22	8	15		144870	14	6	9		144870	8	4	6
144970	20	10	12		144970	13	6	8		144970	7	4	9
145070	21	12	13		145070	14	5	7		145070	7	5	12
145170	22	8	9		145170	15	5	6		145170	6	5	7
145270	20	11	13		145270	16	7	8		145270	9	4	8
145370	21	9	12		145370	16	6	9		145370	8	5	7
145470	19	8	9		145470	14	5	10		145470	8	3	9
145570	20	7	14		145570	11	5	7		145570	8	3	5
145670	20	11	8		145670	16	7	9		145670	6	3	9
145770	22	10	10		145770	12	6	8		145770	8	5	6
145870	23	7	15		145870	12	6	7		145870	9	4	8
145970	18	8	10		145970	11	7	9		145970	7	5	7
146070	21	11	10		146070	13	6	8		146070	7	5	8
146170	17	10	10		146170	19	7	6		146170	8	5	7
146270	17	7	11		146270	11	7	7		146270	6	4	8
146370	18	7	10		146370	12	5	8		146370	8	5	8
146470	20	9	11		146470	14	7	8		146470	7	3	7
146570	19	8	11		146570	14	8	8		146570	8	4	4
146670	19	9	12		146670	15	7	8		146670	8	4	7
146770	19	8	13		146770	16	6	7		146770	9	3	7
146870	21	9	16		146870	15	8	8		146870	7	3	6
146970	19	11	11		146970	15	5	8		146970	6	3	7
147070	17	7	14		147070	14	6	6		147070	6	4	6
147170	18	10	12		147170	15	8	4		147170	6	6	8
147270	20	10	10		147270	14	6	8		147270	12	5	10
147370	21	9	12		147370	14	6	6		147370	7	5	9
147470	15	9	11		147470	15	6	6		147470	9	5	7
147570	20	9	10		147570	14	6	5		147570	7	5	7
147670	20	8	13		147670	13	6	7		147670	10	3	6
147770	17	11	9		147770	13	5	7		147770	7	3	8
147870	21	9	10		147870	11	8	7		147870	7	4	6
147970	19	8	11		147970	15	4	6		147970	8	4	8
148070	20	6	11		148070	13	7	8		148070	8	4	6
148170	19	7	9		148170	12	6	7		148170	7	4	9
148270	19	9	13		148270	14	9	7		148270	8	3	7
148370	19	9	10		148370	14	8	7		148370	8	3	5
148470	21	8	11		148470	11	7	6		148470	6	4	5
148570	18	10	12		148570	12	8	6		148570	7	4	6
148670	21	6	9		148670	13	6	8		148670	5	4	7
148770	19	10	8		148770	13	5	8		148770	8	4	8
148870	21	8	12		148870	10	5	8		148870	9	5	8
148970	20	9	13		148970	15	5	6		148970	5	5	8
149070	17	9	15		149070	16	8	8		149070	10	2	11
149170	20	8	12		149170	13	7	9		149170	6	4	8
149270	11	8	12		149270	13	6	7		149270	7	4	9
149370	20	6	9		149370	16	5	8		149370	8	3	7
149470	21	7	13		149470	14	5	6		149470	7	5	7
149570	17	9	15		149570	11	6	7		149570	8	2	6
149670	20	5	11		149670	14	6	7		149670	5	5	7
149770	21	9	13		149770	13	6	6		149770	7	4	7
149870	24	10	11		149870	13	5	7		149870	8	4	10
149970	19	9	12		149970	15	4	6		149970	8	4	7
150070	18	7	11		150070	11	7	6		150070	7	4	7
150170	19	8	11		150170	18	5	6		150170	6	5	9
150270	19	8	13		150270	13	6	7		150270	5	4	8
150370	16	8	9		150370	15	6	8		150370	10	4	6
150470	22	10	10		150470	15	6	5		150470	6	3	6
150570	16	10	10		150570	14	6	9		150570	7	3	5
150670	17	9	13		150670	13	6	5		150670	7	4	7
150770	19	11	12		150770	14	4	7		150770	7	4	6
150870	17	8	12		150870	12	7	7		150870	5	4	7
150970	18	8	8		150970	14	6	6		150970	8	3	7
151070	20	8	12		151070	11	7	7		151070	8	3	8
151170	19	8	11		151170	14	6	7		151170	7	4	7
151270	18	7	10		151270	13	5	6		151270	8	5	6
151370	19	8	14		151370	13	5	7		151370	7	5	8
151470	17	8	11		151470	14	6	4		151470	6	3	7
151570	21	7	15		151570	16	5	6		151570	6	5	8
151670	18	9	10		151670	14	7	7		151670	5	6	6
151770	21	7	12		151770	13	4	8		151770	7	4	7
151870	16	7	9		151870	15	5	6		151870	6	4	7
151970	17	8	14		151970	12	7	8		151970	8	5	9
152070	16	8	12		152070	17	6	6		152070	7	5	6
152170	19	7	12		152170	11	6	7		152170	7	3	6
152270	16	8	12		152270	12	6	8		152270	7	3	7
152370	19	6	10		152370	13	5	7		152370	6	3	9
152470	18	10	14		152470	12	5	6		152470	8	6	9
152570	16	8	12		152570	15	5	7		152570	8	4	5
152670	18	7	12		152670	12	5	6		152670	10	4	7
152770	21	9	12		152770	16	9	10		152770	6	3	7
152870	16	9	12		152870	13	6	7		152870	8	3	8
152970	19	9	13		152970	13	5	6		152970	8	4	8
153070	21	6	12		153070	16	6	6		153070	8	5	8
153170	17	9	10		153170	14	7	6		153170	7	5	9
153270	21	5	12		153270	13	6	7		153270	7	5	7
153370	15	7	11		153370	12	7	5		153370	8	3	6
153470	17	9	14		153470	12	6	8		153470	7	5	6
153570	20	9	10		153570	14	6	7		153570	6	5	8
153670	19	7	13		153670	14	5	8		153670	8	4	9
153770	18	10	12		153770	15	5	6		153770	7	3	9
153870	15	8	12		153870	15	6	8		153870	8	3	5
153970	18	11	11		153970	12	6	8		153970	7	5	6
154070	16	9	14		154070	12	7	7		154070	7	3	8
154170	17	9	12		154170	13	6	7		154170	6	4	7
154270	19	10	11		154270	10	6	7		154270	6	5	7
154370	16	10	16		154370	15	5	8		154370	7	3	7
154470	16	10	11		154470	13	5	6		154470	8	4	8
154570	18	10	14		154570	13	4	7		154570	7	3	7
154670	22	6	10		154670	11	7	5		154670	6	4	7
154770	19	6	12		154770	11	6	8		154770	4	3	7
154870	17	6	11		154870	15	7	8		154870	8	3	7
154970	17	7	13		154970	12	6	7		154970	6	3	8
155070	20	10	12		155070	12	5	7		155070	6	4	7
155170	17	7	9		155170	15	7	8		155170	6	3	8
155270	22	7	10		155270	11	6	6		155270	6	3	7
155370	16	10	10		155370	13	4	6		155370	6	4	8
155470	17	8	9		155470	12	5	7		155470	6	3	5
155570	18	7	13		155570	9	4	4		155570	10	3	8
155670	17	8	7		155670	15	6	6		155670	9	4	7
155770	20	9	11		155770	17	6	7		155770	7	3	6
155870	16	9	13		155870	12	6	6		155870	5	4	7
155970	14	7	13		155970	14	6	6		155970	9	3	8
156070	20	7	12		156070	11	6	7		156070	8	4	8
156170	17	10	13		156170	11	7	6		156170	7	4	10
156270	15	11	11		156270	12	6	7		156270	6	4	8
156370	17	8	12		156370	13	7	7		156370	7	3	5
156470	16	9	12		156470	14	5	7		156470	6	4	6
156570	15	9	13		156570	14	5	8		156570	7	2	7
156670	17	8	15		156670	16	5	9		156670	8	3	7
156770	17	8	12		156770	12	7	6		156770	6	5	9
156870	21	9	13		156870	12	5	6		156870	7	5	7
156970	18	8	11		156970	11	5	8		156970	8	4	6
157070	13	8	12		157070	12	6	7		157070	5	4	7
157170	17	9	13		157170	10	5	6		157170	6	2	8
157270	15	9	10		157270	10	6	9		157270	5	4	6
157370	18	9	11		157370	13	4	7		157370	7	3	5
157470	16	9	13		157470	9	5	4		157470	8	2	7
157570	16	8	16		157570	10	5	6		157570	7	5	7
157670	14	8	11		157670	12	6	6		157670	9	6	11
157770	16	8	12		157770	13	8	7		157770	6	4	6
157870	14	10	11		157870	12	5	8		157870	8	4	7
157970	17	8	11		157970	14	4	6		157970	6	4	7
158070	17	6	11		158070	10	4	6		158070	7	4	7
158170	17	7	12		158170	13	8	6		158170	5	3	8
158270	15	9	12		158270	11	7	6		158270	7	3	5
158370	18	8	11		158370	13	5	7		158370	7	5	7
158470	17	9	12		158470	12	6	5		158470	7	3	6
158570	17	7	13		158570	12	6	7		158570	6	4	5
158670	16	9	12		158670	10	7	8		158670	7	3	7
158770	18	8	13		158770	13	5	6		158770	5	3	7
158870	15	9	12		158870	11	6	10		158870	6	4	6
158970	14	7	11		158970	6	5	7		158970	7	4	7
159070	16	7	13		159070	14	7	5		159070	7	4	8
159170	15	8	13		159170	13	5	8		159170	6	3	6
159270	15	9	12		159270	11	5	5		159270	8	3	6
159370	14	7	13		159370	10	6	7		159370	8	3	5
159470	15	8	12		159470	12	7	7		159470	8	4	8
159570	16	11	12		159570	13	4	8		159570	7	4	6
159670	16	7	14		159670	12	5	5		159670	6	4	8
159770	14	7	11		159770	11	6	6		159770	5	4	5
159870	19	9	11		159870	13	5	5		159870	6	3	8
159970	15	8	9		159970	10	7	7		159970	6	3	7
160070	16	7	12		160070	10	5	7		160070	6	5	7
160170	16	7	13		160170	11	6	6		160170	4	5	5
160270	15	7	12		160270	10	7	7		160270	8	3	7
160370	14	6	12		160370	9	6	6		160370	5	4	7
160470	17	5	9		160470	11	5	7		160470	7	3	8
160570	14	7	10		160570	11	4	6		160570	6	3	7
160670	16	8	14		160670	12	5	9		160670	6	6	7
160770	17	8	11		160770	13	7	7		160770	6	4	8
160870	14	6	14		160870	13	6	7		160870	8	4	7
160970	18	8	10		160970	10	5	8		160970	7	5	8
161070	16	8	12		161070	12	6	6		161070	6	4	8
161170	15	7	10		161170	10	8	6		161170	7	4	6
161270	16	9	11		161270	9	5	6		161270	5	2	7
161370	16	9	10		161370	14	4	7		161370	7	4	9
161470	16	7	10		161470	10	6	5		161470	6	3	7
161570	15	8	10		161570	12	4	6		161570	7	4	6
161670	16	7	11		161670	12	6	8		161670	9	3	7
161770	15	9	12		161770	16	5	7		161770	8	4	7
161870	17	7	13		161870	11	5	8		161870	8	5	8
161970	14	8	13		161970	8	4	8		161970	6	4	7
162070	13	6	12		162070	10	5	6		162070	8	5	9
162170	13	7	13		162170	9	5	7		162170	7	3	8
162270	11	8	10		162270	11	6	7		162270	5	6	8
162370	13	8	8		162370	12	5	6		162370	7	2	7
162470	15	7	13		162470	13	5	7		162470	5	4	6
162570	14	9	12		162570	9	4	7		162570	6	3	6
162670	16	8	13		162670	12	5	6		162670	7	6	8
162770	16	8	11		162770	10	5	7		162770	5	5	7
162870	16	7	16		162870	10	6	6		162870	7	3	5
162970	14	9	11		162970	11	5	6		162970	6	4	5
163070	16	6	11		163070	12	5	7		163070	8	3	6
163170	16	8	11		163170	10	6	6		163170	6	3	7
163270	14	6	11		163270	12	6	7		163270	6	3	7
163370	12	8	14		163370	12	6	6		163370	6	4	8
163470	14	8	11		163470	12	5	5		163470	6	3	9
163570	16	8	11		163570	9	5	6		163570	5	5	7
163670	14	8	13		163670	10	6	6		163670	8	4	6
163770	15	9	13		163770	12	4	9		163770	5	4	5
163870	17	9	15		163870	12	5	7		163870	6	3	7
163970	15	8	10		163970	11	4	7		163970	8	4	8
164070	17	8	13		164070	7	6	7		164070	6	2	6
164170	15	8	12		164170	11	5	7		164170	5	3	6
164270	15	8	11		164270	12	6	6		164270	6	4	8
164370	17	9	12		164370	12	5	7		164370	8	3	6
164470	16	9	11		164470	13	6	6		164470	6	2	7
164570	14	9	14		164570	11	6	8		164570	5	2	9
164670	16	8	14		164670	12	5	7		164670	5	3	6
164770	15	8	12		164770	10	4	6		164770	4	3	5
164870	15	10	10		164870	14	6	7		164870	7	4	6
164970	18	7	11		164970	12	4	6		164970	7	4	7
165070	15	8	12		165070	11	5	5		165070	6	4	6
165170	16	7	10		165170	13	6	8		165170	7	4	7
165270	17	7	10		165270	11	5	6		165270	6	5	7
165370	14	7	10		165370	11	5	8		165370	6	4	7
165470	13	9	16		165470	11	4	5		165470	5	4	10
165570	15	9	14		165570	10	6	6		165570	5	3	9
165670	15	8	12		165670	11	5	6		165670	5	3	8
165770	16	9	12		165770	9	6	5		165770	5	4	7
165870	11	8	11		165870	9	4	7		165870	6	4	7
165970	14	8	10		165970	11	6	6		165970	6	4	7
166070	13	8	10		166070	13	4	6		166070	7	3	7
166170	16	8	10		166170	8	5	8		166170	7	3	7
166270	14	8	13		166270	11	4	7		166270	5	6	7
166370	12	7	12		166370	10	5	9		166370	6	3	10
166470	13	8	12		166470	11	5	6		166470	7	5	6
166570	19	9	11		166570	14	6	6		166570	6	3	6
166670	13	7	11		166670	8	4	5		166670	7	4	7
166770	15	7	8		166770	12	4	6		166770	6	5	8
166870	14	7	13		166870	11	4	7		166870	5	3	6
166970	16	7	13		166970	9	4	6		166970	5	2	7
167070	17	6	11		167070	8	4	9		167070	6	3	6
167170	14	7	12		167170	11	6	8		167170	6	6	8
167270	14	7	11		167270	10	4	6		167270	5	3	6
167370	11	9	12		167370	12	5	8		167370	5	3	8
167470	13	6	13		167470	10	5	8		167470	4	4	6
167570	16	7	15		167570	12	8	6		167570	8	5	8
167670	16	7	13		167670	13	5	7		167670	5	4	6
167770	16	7	12		167770	11	5	7		167770	6	4	8
167870	17	7	16		167870	10	6	7		167870	6	3	7
167970	17	9	10		167970	10	5	7		167970	7	3	7
168070	13	6	12		168070	8	5	7		168070	5	3	9
168170	13	7	10		168170	9	6	7		168170	8	3	8
168270	14	8	11		168270	9	6	5		168270	6	3	6
168370	14	7	12		168370	11	5	7		168370	5	4	7
168470	17	8	13		168470	9	3	8		168470	5	4	7
168570	12	5	11		168570	12	3	6		168570	6	4	6
168670	16	8	10		168670	11	5	6		168670	7	4	9
168770	13	7	12		168770	10	6	5		168770	6	4	5
168870	14	7	12		168870	10	3	7		168870	7	3	5
168970	17	8	14		168970	13	5	6		168970	5	3	7
169070	12	8	12		169070	13	6	6		169070	7	3	8
169170	14	6	10		169170	12	8	7		169170	7	4	9
169270	15	8	11		169270	9	7	8		169270	7	4	8
169370	15	10	12		169370	10	4	5		169370	7	3	5
169470	16	8	11		169470	12	5	6		169470	7	4	7
169570	15	7	9		169570	12	5	5		169570	6	3	8
169670	14	6	9		169670	9	7	6		169670	4	3	6
169770	15	8	15		169770	10	5	7		169770	5	3	8
169870	17	7	11		169870	9	4	7		169870	5	2	7
169970	13	9	11		169970	10	6	6		169970	6	3	6
170070	11	6	8		170070	12	5	5		170070	6	4	7
170170	15	9	13		170170	10	7	6		170170	5	3	8
170270	13	6	12		170270	12	6	7		170270	6	4	6
170370	12	7	10		170370	10	4	8		170370	6	3	6
170470	17	9	11		170470	11	4	5		170470	5	3	7
170570	14	7	13		170570	9	4	5		170570	5	3	8
170670	13	9	12		170670	11	5	7		170670	6	4	7
170770	14	6	13		170770	9	4	7		170770	6	4	8
170870	13	6	13		170870	9	4	8		170870	6	4	8
170970	13	6	12		170970	11	3	7		170970	6	3	6
171070	14	7	13		171070	11	7	9		171070	6	4	7
171170	18	7	9		171170	12	5	7		171170	5	5	7
171270	13	7	12		171270	9	4	6		171270	6	4	8
171370	12	6	12		171370	11	6	6		171370	7	4	9
171470	17	8	11		171470	12	5	6		171470	5	4	7
171570	15	7	14		171570	10	4	8		171570	6	4	6
171670	15	8	11		171670	10	5	6		171670	5	4	7
171770	14	7	10		171770	11	5	7		171770	7	3	8
171870	13	8	13		171870	9	5	5		171870	5	4	8
171970	15	6	10		171970	8	6	6		171970	6	4	7
172070	12	9	9		172070	10	6	6		172070	6	4	8
172170	12	6	10		172170	10	6	5		172170	6	2	6
172270	11	7	12		172270	11	4	8		172270	6	3	6
172370	15	6	12		172370	11	5	8		172370	8	4	6
172470	14	8	12		172470	10	7	5		172470	6	4	9
172570	14	8	13		172570	8	4	7		172570	6	3	9
172670	14	10	11		172670	10	4	7		172670	5	4	6
172770	17	7	12		172770	10	5	5		172770	6	3	7
172870	13	9	11		172870	12	5	6		172870	5	5	8
172970	13	6	10		172970	10	5	5		172970	5	3	8
173070	12	7	10		173070	9	5	7		173070	7	5	7
173170	11	8	12		173170	10	7	6		173170	6	4	7
173270	10	5	12		173270	9	3	6		173270	7	3	4
173370	13	6	12		173370	13	6	5		173370	5	4	7
173470	14	8	13		173470	11	6	6		173470	6	5	7
173570	18	6	10		173570	10	5	5		173570	5	5	5
173670	14	8	9		173670	9	6	7		173670	4	4	7
173770	14	6	12		173770	11	5	6		173770	6	5	7
173870	16	8	10		173870	8	5	8		173870	6	4	9
173970	15	9	10		173970	10	3	5		173970	7	3	8
174070	15	7	10		174070	9	4	7		174070	6	3	7
174170	13	6	10		174170	9	4	7		174170	5	3	8
174270	12	7	12		174270	8	4	6		174270	4	3	5
174370	10	8	12		174370	9	4	6		174370	5	3	6
174470	12	7	12		174470	7	4	7		174470	5	3	8
174570	15	8	10		174570	9	3	5		174570	6	4	8
174670	16	8	9		174670	9	6	6		174670	6	4	6
174770	14	7	11		174770	10	6	8		174770	6	4	7
174870	12	7	13		174870	10	5	8		174870	4	3	6
174970	11	7	11		174970	8	5	6		174970	6	4	7
175070	11	9	10		175070	10	6	9		175070	5	4	7
175170	12	7	11		175170	10	6	7		175170	5	4	7
175270	13	5	12		175270	9	6	6		175270	5	6	7
175370	16	7	13		175370	10	4	6		175370	5	2	6
175470	12	7	10		175470	11	4	7		175470	5	4	7
175570	14	7	13		175570	8	4	7		175570	6	4	6
175670	14	9	11		175670	7	6	5		175670	6	5	8
175770	12	7	12		175770	9	4	8		175770	6	3	7
175870	12	9	11		175870	8	5	7		175870	4	3	5
175970	12	8	10		175970	7	6	7		175970	6	3	7
176070	12	6	12		176070	10	4	5		176070	6	2	7
176170	12	5	10		176170	9	4	6		176170	4	3	8
176270	13	7	10		176270	8	5	6		176270	6	2	10
176370	14	6	11		176370	10	5	6		176370	4	5	6
176470	13	6	11		176470	10	5	7		176470	5	4	8
176570	13	8	12		176570	10	7	7		176570	5	4	8
176670	12	8	10		176670	7	4	8		176670	6	5	7
176770	13	8	9		176770	9	5	6		176770	6	4	8
176870	14	9	10		176870	13	5	5		176870	4	3	6
176970	11	9	10		176970	10	4	5		176970	6	4	10
177070	10	5	12		177070	11	4	9		177070	7	4	6
177170	11	5	12		177170	11	5	7		177170	5	3	9
177270	13	6	10		177270	11	7	6		177270	6	4	7
177370	13	7	10		177370	10	5	4		177370	4	2	5
177470	12	6	11		177470	11	3	8		177470	5	4	6
177570	14	6	13		177570	10	3	7		177570	4	5	6
177670	12	9	13		177670	9	3	6		177670	4	3	6
177770	12	6	10		177770	12	5	8		177770	6	4	8
177870	14	6	13		177870	9	4	6		177870	5	4	8
177970	12	7	13		177970	7	4	6		177970	4	3	5
178070	14	6	10		178070	10	5	4		178070	6	3	7
178170	10	8	9		178170	11	4	5		178170	6	4	5
178270	10	6	11		178270	9	3	7		178270	4	6	7
178370	11	7	11		178370	8	4	6		178370	8	3	8
178470	14	10	11		178470	10	4	7		178470	4	4	7
178570	13	7	13		178570	11	6	8		178570	5	6	7
178670	14	9	11		178670	11	5	6		178670	5	3	6
178770	12	5	10		178770	9	4	4		178770	6	3	7
178870	12	8	9		178870	6	5	6		178870	6	4	8
178970	13	6	9		178970	9	5	5		178970	5	4	7
179070	11	8	13		179070	9	4	7		179070	7	3	7
179170	12	9	11		179170	11	6	7		179170	6	3	7
179270	12	11	9		179270	8	6	7		179270	6	3	5
179370	13	8	10		179370	12	7	6		179370	7	4	9
179470	10	6	12		179470	12	4	8		179470	5	4	8
179570	13	10	11		179570	9	4	5		179570	6	3	8
179670	12	8	11		179670	11	6	6		179670	5	4	7
179770	12	6	11		179770	12	5	5		179770	7	3	9
179870	12	7	10		179870	8	5	6		179870	5	4	8
179970	14	9	10		179970	10	5	8		179970	4	4	7
180070	13	7	12		180070	7	4	7		180070	7	3	8
180170	13	6	13		180170	10	3	5		180170	5	2	9
180270	10	5	13		180270	9	5	7		180270	5	2	9
180370	14	6	11		180370	7	6	7		180370	7	4	10
180470	15	6	10		180470	12	5	9		180470	3	5	8
180570	12	6	11		180570	8	3	7		180570	6	3	7
180670	9	7	9		180670	10	4	5		180670	6	3	9
180770	11	6	10		180770	9	3	6		180770	4	3	7
180870	12	6	9		180870	8	6	5		180870	5	3	5
180970	12	5	12		180970	10	5	7		180970	6	3	8
181070	12	7	12		181070	11	5	6		181070	6	2	8
181170	12	8	10		181170	10	4	7		181170	4	3	10
181270	11	6	9		181270	5	3	6		181270	5	2	6
181370	13	8	14		181370	6	3	6		181370	4	3	6
181470	11	5	12		181470	7	5	7		181470	6	3	7
181570	12	9	11		181570	8	4	8		181570	5	4	8
181670	11	7	11		181670	11	5	10		181670	5	3	7
181770	12	8	9		181770	8	4	6		181770	3	2	7
181870	11	9	12		181870	9	5	6		181870	4	5	7
181970	13	8	11		181970	8	5	7		181970	5	4	8
182070	13	7	11		182070	8	4	5		182070	7	3	7
182170	13	7	12		182170	9	5	4		182170	8	4	7
182270	11	5	12		182270	9	5	8		182270	5	3	9
182370	11	5	9		182370	9	5	5		182370	5	3	8
182470	12	7	11		182470	9	3	9		182470	5	3	6
182570	12	7	12		182570	11	5	7		182570	7	5	6
182670	14	8	12		182670	8	5	6		182670	5	3	7
182770	11	5	10		182770	9	5	8		182770	5	3	9
182870	11	4	12		182870	10	3	7		182870	3	2	8
182970	13	6	11		182970	9	3	6		182970	5	3	7
183070	11	6	14		183070	7	4	6		183070	5	4	8
183170	12	9	11		183170	9	4	6		183170	5	4	6
183270	13	8	12		183270	9	3	7		183270	6	3	6
183370	14	7	12		183370	9	4	7		183370	5	3	5
183470	11	5	10		183470	8	5	7		183470	5	4	9
183570	12	7	9		183570	10	4	8		183570	7	3	7
183670	11	6	11		183670	10	5	6		183670	5	4	7
183770	13	6	9		183770	8	4	7		183770	4	3	7
183870	9	8	11		183870	9	4	5		183870	6	3	9
183970	13	9	13		183970	7	6	7		183970	5	4	9
184070	13	6	11		184070	7	5	6		184070	5	2	7
184170	11	6	10		184170	9	4	5		184170	4	3	7
184270	9	7	13		184270	9	3	7		184270	4	3	6
184370	12	8	11		184370	7	4	7		184370	4	5	8
184470	12	6	11		184470	9	4	6		184470	5	3	5
184570	9	4	13		184570	7	5	6		184570	5	4	8
184670	11	7	12		184670	9	5	6		184670	6	3	8
184770	13	8	11		184770	10	4	6		184770	5	3	7
184870	14	6	11		184870	7	6	7		184870	6	4	8
184970	12	7	12		184970	8	4	8		184970	5	3	6
185070	13	8	11		185070	9	4	8		185070	4	3	7
185170	11	8	10		185170	9	5	7		185170	4	3	5
185270	11	8	9		185270	9	5	7		185270	4	4	8
185370	10	5	12		185370	7	4	8		185370	5	3	6
185470	13	6	9		185470	9	2	9		185470	5	2	6
185570	8	8	13		185570	9	5	7		185570	3	3	5
185670	11	9	12		185670	12	3	7		185670	4	3	7
185770	11	7	13		185770	8	3	6		185770	6	2	7
185870	9	6	12		185870	9	4	5		185870	6	5	6
185970	12	8	13		185970	9	5	7		185970	5	4	7
186070	12	5	11		186070	9	5	7		186070	5	4	8
186170	16	8	11		186170	8	5	5		186170	7	3	8
186270	12	7	11		186270	10	4	7		186270	5	3	8
186370	12	6	11		186370	10	4	6		186370	6	3	8
186470	9	6	13		186470	7	3	7		186470	5	3	8
186570	11	6	11		186570	8	4	7		186570	5	4	7
186670	12	6	11		186670	8	5	6		186670	4	4	7
186770	11	3	12		186770	9	3	8		186770	5	3	8
186870	14	5	11		186870	7	3	7		186870	4	3	7
186970	13	8	9		186970	8	5	8		186970	4	4	6
187070	11	5	12		187070	9	4	7		187070	5	5	7
187170	9	6	14		187170	9	5	7		187170	5	3	7
187270	16	8	12		187270	10	5	7		187270	5	5	6
187370	12	6	9		187370	8	3	5		187370	5	4	6
187470	10	9	11		187470	10	4	7		187470	5	3	8
187570	12	9	10		187570	8	3	9		187570	4	2	8
187670	10	7	11		187670	9	5	4		187670	6	3	8
187770	11	6	14		187770	9	7	5		187770	6	3	6
187870	12	7	12		187870	9	4	10		187870	5	5	5
187970	10	6	9		187970	9	3	7		187970	4	3	7
188070	9	7	14		188070	8	3	7		188070	3	4	6
188170	10	4	10		188170	9	5	6		188170	4	3	6
188270	11	8	12		188270	7	4	7		188270	3	4	7
188370	11	5	10		188370	8	4	5		188370	4	5	7
188470	12	9	10		188470	7	5	5		188470	5	3	4
188570	10	6	13		188570	10	4	6		188570	4	3	7
188670	11	7	10		188670	9	5	6		188670	5	3	6
188770	8	7	8		188770	8	4	7		188770	7	4	5
188870	11	8	13		188870	7	3	6		188870	5	3	5
188970	11	7	10		188970	8	4	8		188970	6	2	8
189070	10	7	11		189070	9	4	6		189070	5	3	8
189170	10	7	8		189170	8	3	7		189170	5	3	9
189270	11	5	10		189270	7	5	7		189270	6	4	9
189370	12	7	14		189370	9	4	6		189370	4	2	7
189470	10	6	9		189470	6	5	6		189470	5	3	7
189570	10	7	12		189570	9	4	9		189570	5	4	8
189670	10	8	10		189670	8	4	6		189670	4	5	7
189770	12	8	12		189770	9	5	6		189770	5	4	5
189870	11	9	11		189870	8	5	7		189870	5	2	5
189970	10	5	11		189970	7	4	5		189970	6	4	7
190070	9	9	13		190070	8	6	6		190070	7	2	3
190170	10	5	12		190170	8	4	6		190170	4	4	5
190270	11	10	10		190270	11	4	7		190270	4	3	7
190370	11	8	11		190370	10	5	6		190370	4	4	7
190470	12	7	10		190470	8	5	7		190470	6	4	4
190570	10	6	10		190570	6	6	7		190570	4	3	6
190670	11	6	13		190670	7	4	8		190670	4	3	7
190770	12	9	15		190770	9	4	6		190770	5	3	6
190870	10	8	12		190870	11	5	7		190870	4	4	8
190970	9	7	12		190970	7	6	8		190970	4	3	7
191070	12	8	10		191070	8	4	5		191070	6	4	5
191170	12	7	9		191170	9	5	8		191170	5	4	7
191270	8	7	11		191270	11	4	5		191270	6	3	8
191370	10	8	14		191370	8	5	9		191370	4	2	6
191470	10	5	10		191470	8	4	6		191470	6	2	7
191570	11	5	13		191570	9	6	8		191570	5	3	7
191670	12	5	11		191670	9	4	6		191670	4	3	6
191770	11	7	11		191770	8	5	6		191770	5	4	7
191870	11	6	8		191870	7	4	7		191870	5	2	6
191970	10	7	10		191970	8	4	8		191970	6	3	7
192070	11	8	13		192070	7	5	8		192070	6	3	6
192170	10	6	10		192170	7	5	7		192170	5	3	7
192270	11	6	11		192270	8	5	5		192270	4	5	7
192370	10	7	11		192370	9	5	6		192370	4	3	9
192470	10	7	10		192470	8	5	7		192470	5	3	6
192570	12	8	12		192570	6	4	7		192570	6	4	6
192670	11	7	14		192670	7	5	7		192670	5	3	9
192770	10	7	10		192770	8	5	7		192770	5	4	8
192870	12	8	13		192870	9	6	9		192870	5	5	5
192970	10	8	10		192970	6	5	7		192970	4	3	7
193070	11	7	10		193070	9	5	5		193070	5	2	6
193170	11	7	10		193170	6	4	4		193170	5	4	7
193270	8	9	10		193270	10	6	6		193270	4	3	7
193370	10	6	9		193370	6	3	8		193370	6	3	6
193470	10	6	12		193470	8	5	7		193470	5	3	8
193570	9	7	10		193570	9	4	7		193570	5	3	7
193670	9	7	10		193670	11	5	7		193670	4	4	7
193770	10	6	13		193770	9	4	5		193770	6	3	7
193870	9	7	10		193870	6	5	6		193870	5	3	8
193970	9	6	9		193970	7	3	6		193970	6	3	10
194070	11	8	9		194070	7	4	7		194070	5	4	6
194170	12	6	10		194170	7	4	9		194170	5	3	7
194270	12	6	13		194270	7	4	5		194270	4	3	7
194370	9	5	14		194370	7	5	7		194370	6	3	8
194470	11	5	12		194470	8	4	5		194470	4	3	6
194570	10	8	11		194570	9	5	6		194570	4	3	9
194670	9	8	11		194670	6	5	7		194670	4	4	8
194770	8	8	13		194770	7	3	6		194770	4	3	6
194870	10	5	11		194870	8	5	6		194870	4	4	5
194970	12	7	12		194970	7	5	6		194970	7	2	6
195070	9	5	10		195070	8	5	7		195070	5	3	6
195170	9	6	12		195170	7	4	7		195170	3	4	8
195270	10	8	9		195270	6	3	6		195270	5	3	8
195370	10	7	12		195370	8	5	10		195370	3	2	6
195470	9	6	9		195470	9	6	7		195470	3	3	8
195570	10	8	11		195570	9	5	5		195570	3	4	7
195670	10	7	12		195670	8	3	5		195670	5	3	6
195770	12	6	11		195770	7	3	7		195770	5	5	7
195870	11	5	13		195870	8	4	8		195870	3	4	8
195970	11	7	11		195970	9	6	6		195970	4	3	5
196070	11	8	9		196070	9	4	6		196070	6	3	7
196170	8	6	11		196170	10	3	7		196170	4	4	6
196270	10	7	13		196270	9	4	7		196270	5	3	7
196370	9	6	10		196370	7	5	7		196370	5	3	7
196470	13	6	9		196470	7	5	5		196470	3	3	9
196570	13	7	10		196570	7	4	8		196570	5	3	8
196670	11	7	10		196670	5	4	5		196670	4	3	8
196770	9	6	12		196770	7	4	7		196770	4	3	7
196870	9	6	10		196870	11	4	7		196870	4	3	7
196970	9	6	13		196970	8	4	6		196970	3	4	7
197070	11	10	11		197070	9	5	6		197070	2	5	8
197170	10	7	11		197170	5	5	5		197170	5	4	5
197270	9	6	14		197270	8	6	5		197270	5	3	7
197370	11	5	9		197370	6	5	6		197370	3	3	6
197470	11	7	13		197470	8	3	7		197470	5	3	7
197570	8	7	13		197570	7	5	7		197570	5	3	7
197670	9	5	11		197670	7	4	6		197670	5	3	8
197770	8	7	12		197770	6	4	7		197770	4	3	6
197870	9	5	9		197870	7	5	8		197870	3	3	9
197970	7	8	12		197970	7	4	6		197970	6	4	8
198070	11	9	13		198070	7	5	8		198070	5	4	5
198170	9	7	11		198170	6	5	9		198170	4	3	7
198270	8	6	10		198270	7	4	5		198270	4	3	7
198370	11	8	12		198370	7	4	6		198370	3	3	7
198470	11	7	14		198470	9	4	7		198470	4	3	8
198570	11	7	13		198570	7	5	4		198570	3	3	9
198670	10	7	10		198670	8	5	6		198670	5	3	6
198770	13	7	12		198770	8	5	7		198770	4	4	6
198870	9	6	12		198870	9	5	7		198870	4	3	6
198970	13	6	12		198970	6	3	9		198970	3	3	6
199070	9	7	9		199070	9	3	6		199070	5	4	8
199170	9	6	12		199170	7	4	6		199170	4	2	6
199270	10	8	10		199270	5	3	6		199270	4	4	9
199370	10	7	13		199370	7	4	8		199370	4	3	6
199470	9	7	12		199470	7	5	5		199470	6	5	7
199570	10	9	11		199570	8	5	6		199570	4	3	7
199670	9	7	11		199670	8	5	6		199670	4	3	8
199770	10	5	10		199770	6	5	4		199770	4	3	7
199870	12	6	11		199870	8	4	6		199870	5	3	6
199970	9	8	11		199970	9	4	7		199970	5	5	6
200070	11	7	12		200070	7	4	7		200070	5	2	6
200170	11	6	13		200170	7	5	7		200170	5	3	7
200270	8	7	12		200270	9	4	6		200270	4	4	7
[truncated: 1,002 more rows]
