# Supplementary material for: Impact of energy limitations on function and resilience in long-wavelength Photosystem II
Source: eLife. 2022 Jul 19;11:e79890. doi: 10.7554/eLife.79890 (PMC9439682; doi:10.7554/eLife.79890)
Supplement: Appendix 6—figure 1—source data 1. [file elife-79890-app6-fig1-data1.xlsx]

## Sheet: Spectra
Light sources emission						Membranes absorption
	Xenon lamp			LED 660 nm			A. marina			C. thermalis WL			C. thermalis FR
400.013	0.00198		400.013	-0.000227609		799.992	0.00148		800.01	0.000780806		799.986	0.00628
400.423	0.00168		400.423	0.000758697		798.987	0.01141		799.005	0.000121535		799.016	0.00827
400.834	0.00234		400.834	0.00102		798.017	0.01834		797.999	-0.000542312		798.011	0.00821
401.244	0.00214		401.244	0.000758697		797.011	0.02226		796.994	-0.00121		797.005	0.00844
401.654	0.00102		401.654	0.000796631		796.006	0.02109		795.987	-0.00214		795.999	0.00891
402.064	0.000661342		402.064	0.00114		794.999	0.01982		795.016	-0.00268		794.993	0.00976
402.474	-0.000254362		402.474	0.000493153		793.993	0.02159		794.009	-0.00217		793.986	0.00953
402.883	-0.000356107		402.883	-0.000455218		792.986	0.02589		793.001	-0.00125		793.013	0.01034
403.293	-0.000559597		403.293	0.000417283		792.013	0.02878		791.994	-0.000921228		792.006	0.01006
403.702	0.00198		403.702	0.0044		791.005	0.02878		790.986	-7.10582e-05		790.998	0.0122
404.112	0.00305		404.112	0.00611		789.997	0.02693		790.012	-0.00144		789.989	0.01315
404.521	0.00188		404.521	0.00421		788.989	0.02514		789.003	-0.00216		789.015	0.01359
404.93	0.00193		404.93	0.00178		788.014	0.02404		787.993	-0.00327		788.006	0.01337
405.339	0.00178		405.339	0.000682827		787.005	0.02254		786.984	-0.00344		786.996	0.01444
405.747	0.00178		405.747	-0.000151739		785.995	0.01971		786.008	-0.00318		785.986	0.01366
406.156	0.00203		406.156	-0.000113804		784.985	0.01675		784.998	-0.00205		785.011	0.01472
406.564	0.00102		406.564	0.000379348		784.01	0.01642		783.987	-0.00173		784	0.01544
406.973	0.000661342		406.973	0.00125		782.999	0.01756		783.011	-0.00092302		782.989	0.01481
407.381	0.00203		407.381	0.000910436		781.987	0.0185		781.999	-0.000999062		782.012	0.01598
407.789	0.0032		407.789	0.000758697		781.01	0.01933		780.987	-0.00127		781	0.01662
408.197	0.0029		408.197	0.000682827		779.998	0.02003		780.009	-0.00208		779.988	0.01883
408.604	0.00203		408.604	0.000417283		778.986	0.02143		778.996	-0.00187		779.01	0.01939
409.012	0.00153		409.012	0.000910436		778.008	0.02219		777.983	-0.0014		777.997	0.02003
409.419	0.00117		409.419	0.0014		776.994	0.02144		777.004	-0.000369063		776.983	0.02134
409.827	0.000559597		409.827	0.00178		776.016	0.01866		775.99	0.000410727		776.004	0.02178
410.234	0.000305235		410.234	0.00133		775.002	0.01687		775.011	2.92827e-05		774.99	0.02281
410.641	0.00107		410.641	0.000644892		773.987	0.0162		773.996	-0.000623328		774.01	0.02244
411.048	0.00142		411.048	0.000303479		773.007	0.01721		773.016	-0.000837458		772.995	0.0246
411.455	0.00148		411.455	0.000720762		771.992	0.01863		772	-0.00131		772.014	0.02427
411.861	0.00107		411.861	0.000872501		771.012	0.02022		770.984	-0.000744851		770.999	0.02557
412.268	0.00168		412.268	0.0011		769.996	0.02117		770.003	-0.000806855		770.017	0.02596
412.674	0.00203		412.674	0.00129		769.014	0.02223		768.986	-0.000642283		769.001	0.02652
413.081	0.00158		413.081	0.00125		767.998	0.02244		768.004	-0.000892327		767.984	0.02733
413.487	0.00163		413.487	0.00114		767.016	0.02133		766.987	0.00119		767.001	0.02875
413.893	0.00153		413.893	0.000948371		765.998	0.02049		766.004	0.00374		765.984	0.02904
414.299	0.00132		414.299	0.000948371		765.015	0.02115		764.986	0.00152		765.001	0.0318
414.704	0.00122		414.704	0.000986306		763.997	0.02218		764.002	-0.00219		764.017	0.03226
415.11	0.000661342		415.11	0.00133		763.013	0.02163		762.983	-0.00424		762.998	0.03368
415.515	-0.000356107		415.515	0.00102		761.994	0.02009		761.999	-0.00685		762.014	0.03678
415.921	-0.000254362		415.921	0.000265544		761.01	0.01893		761.014	-0.00458		760.994	0.0395
416.326	5.08725e-05		416.326	0.000379348		759.99	0.01838		759.994	-0.000933239		760.01	0.03988
416.731	-0.00040698		416.731	0.000265544		759.005	0.01809		759.009	-0.000862814		758.989	0.04272
417.136	-0.000915704		417.136	-0.000151739		757.985	0.01974		757.988	-0.000864151		758.004	0.04637
417.54	0.00020349		417.54	0.000872501		756.999	0.02274		757.002	-0.000178726		757.018	0.04967
417.945	0.00117		417.945	0.000455218		756.013	0.02533		756.015	-0.000848251		755.996	0.05439
418.35	0.00168		418.35	0.000189674		754.991	0.02547		754.993	-0.000811542		755.009	0.0566
418.754	0.00142		418.754	0.000227609		754.004	0.02396		754.006	-0.00123		753.987	0.06035
419.158	0.00112		419.158	-0.000417283		753.017	0.02118		752.983	-0.00108		753	0.06431
419.562	0.00214		419.562	-0.000227609		751.994	0.02071		751.995	-0.000791523		752.012	0.0681
419.966	0.00259		419.966	0.000265544		751.007	0.02174		751.007	-0.000715605		750.988	0.06988
420.37	0.00203		420.37	-0.000303479		749.983	0.02282		749.983	-0.0009665		750	0.07386
420.774	0.00112		420.774	-0.000379348		748.994	0.02275		748.994	-0.000561722		749.011	0.07672
421.177	5.08725e-05		421.177	0.000417283		748.005	0.02449		748.005	0.000197183		747.986	0.0802
421.58	0.000763087		421.58	0.00125		747.016	0.0277		747.015	0.000787717		746.997	0.08387
421.984	0.00178		421.984	0.00216		745.991	0.03145		745.99	0.0012		746.007	0.0858
422.387	0.00183		422.387	0.00178		745.001	0.03352		744.999	0.00122		745.017	0.08833
422.79	0.00107		422.79	0.000910436		744.011	0.03387		744.009	0.000636723		743.991	0.09072
423.193	0.00173		423.193	0.000227609		742.985	0.03379		743.018	0.000984454		743	0.09348
423.595	0.00305		423.595	-0.000151739		741.993	0.034		741.991	0.00159		742.008	0.09498
423.998	0.00397		423.998	0.000720762		741.002	0.03408		740.999	0.0015		741.017	0.09725
424.4	0.00336		424.4	0.000569022		740.01	0.03464		740.007	0.000965783		739.989	0.09879
424.803	0.00203		424.803	-3.79348e-05		738.982	0.03654		739.014	0.000927487		738.997	0.10102
425.205	0.00209		425.205	0.000379348		737.99	0.04036		737.986	0.000944694		738.004	0.10319
425.607	0.00376		425.607	0.000834566		736.997	0.04513		736.993	0.00192		737.011	0.10419
426.009	0.00453		426.009	0.000644892		736.004	0.04946		735.999	0.00354		736.017	0.10712
426.411	0.00422		426.411	0.000417283		735.01	0.05278		735.005	0.00447		734.988	0.10895
426.812	0.00331		426.812	0.000265544		734.016	0.05597		734.011	0.00522		733.994	0.11095
427.214	0.0028		427.214	0.000379348		732.987	0.06035		733.016	0.00578		732.999	0.11206
427.615	0.00259		427.615	0.000720762		731.992	0.06713		731.986	0.00582		732.004	0.11489
428.016	0.0031		428.016	0.000644892		730.997	0.07456		730.99	0.00642		731.009	0.11651
428.417	0.00244		428.417	0.000569022		730.002	0.08273		729.995	0.00808		730.014	0.11967
428.818	0.00239		428.818	7.58697e-05		729.006	0.09178		728.999	0.00891		728.982	0.1225
429.219	0.00315		429.219	-0.000227609		728.01	0.10287		728.002	0.00934		727.986	0.12551
429.62	0.00244		429.62	0.000227609		727.014	0.11538		727.006	0.00972		726.99	0.12904
430.02	0.00153		430.02	0.000986306		726.017	0.13001		726.009	0.01018		725.993	0.13281
430.421	0.00168		430.421	0.00106		724.984	0.14565		725.011	0.01187		724.995	0.13669
430.821	0.00112		430.821	0.000227609		723.987	0.16273		724.014	0.01421		723.998	0.1411
431.221	-0.000101745		431.221	0.000379348		722.989	0.18167		723.015	0.01658		723	0.14504
431.621	0.000356107		431.621	0.000796631		721.991	0.20298		722.017	0.01862		722.001	0.14879
432.021	0.00112		432.021	7.58697e-05		720.993	0.22566		720.983	0.02128		721.003	0.15204
432.421	0.00153		432.421	-0.000758697		719.994	0.25092		719.984	0.02399		720.004	0.15643
432.82	0.00163		432.82	-0.000720762		718.995	0.27875		718.984	0.02756		719.004	0.16054
433.22	0.00178		433.22	-0.000644892		717.995	0.30979		717.984	0.03007		718.005	0.16494
433.619	0.00127		433.619	-0.000265544		716.996	0.34387		716.984	0.03215		717.005	0.16868
434.018	0.00112		434.018	-0.000606957		715.996	0.38041		715.984	0.03427		716.004	0.17363
434.417	0.00117		434.417	-0.000834566		714.995	0.41715		714.983	0.03662		715.004	0.17925
434.816	0.00127		434.816	-0.000379348		713.994	0.45398		714.018	0.03967		714.003	0.18275
435.215	0.00168		435.215	0.000872501		712.993	0.492		713.016	0.04435		713.001	0.18711
435.614	0.00193		435.614	0.00182		711.992	0.53202		712.014	0.04899		712	0.19094
436.012	0.00198		436.012	0.00125		710.99	0.57452		711.012	0.05382		710.998	0.19532
436.411	0.00132		436.411	0.000265544		709.988	0.6202		710.01	0.05953		709.995	0.19921
436.809	0.000813959		436.809	0.000644892		708.985	0.66658		709.007	0.06472		708.992	0.20225
437.207	0.00148		437.207	3.79348e-05		707.983	0.711		708.004	0.06982		707.99	0.20567
437.605	0.00239		437.605	0.000455218		707.015	0.75271		707	0.076		706.986	0.20779
438.003	0.0027		438.003	0.000606957		706.012	0.79188		705.997	0.0827		705.982	0.21038
438.4	0.0027		438.4	3.79348e-05		705.008	0.82867		704.992	0.09021		705.014	0.21289
438.798	0.00209		438.798	7.58697e-05		704.004	0.86381		703.988	0.0985		704.01	0.21511
439.195	0.00127		439.195	0.000720762		702.999	0.89739		702.983	0.10813		703.005	0.21927
439.593	0.00112		439.593	0.00121		701.995	0.92798		702.014	0.12064		702	0.22455
439.99	0.00132		439.99	0.00121		700.99	0.95479		701.008	0.13458		700.995	0.2307
440.387	0.00112		440.387	0.00102		699.984	0.9765		700.003	0.14648		699.989	0.23972
440.784	0.00102		440.784	0.00114		699.014	0.99164		698.997	0.15972		698.983	0.24883
441.18	0.00173		441.18	0.00175		698.008	0.99943		697.99	0.17515		698.013	0.26141
441.577	0.00178		441.577	0.00216		697.002	1.00135		696.983	0.19571		697.006	0.27819
441.973	0.00209		441.973	0.00156		695.995	0.99921		696.012	0.22266		695.999	0.29816
442.37	0.0027		442.37	0.000796631		694.988	0.99116		695.005	0.25475		694.992	0.32313
442.766	0.00193		442.766	0.000493153		694.016	0.97595		693.997	0.2903		693.984	0.35277
443.162	0.00127		443.162	0.00156		693.009	0.95373		692.989	0.33055		693.012	0.3875
443.558	0.000763087		443.558	0.00156		692.001	0.92715		692.016	0.37471		692.004	0.42729
443.954	-0.000508725		443.954	0.000796631		690.992	0.89671		691.008	0.42172		690.995	0.46982
444.349	-0.000763087		444.349	0.000265544		689.983	0.86495		689.999	0.4706		689.986	0.51628
444.745	-0.000152617		444.745	3.79348e-05		689.01	0.8294		688.989	0.52214		689.013	0.56611
445.14	0.000763087		445.14	0.000227609		688.001	0.79004		688.016	0.57744		688.003	0.62435
445.536	0.00148		445.536	0.00114		686.991	0.74686		687.006	0.63495		686.993	0.68679
445.931	0.00168		445.931	0.00159		686.017	0.7036		685.995	0.69465		685.983	0.7462
446.326	0.00188		446.326	0.000910436		685.007	0.65941		684.985	0.75411		685.009	0.80478
446.72	0.00178		446.72	0.000531088		683.997	0.61759		684.01	0.81033		683.998	0.85847
447.115	0.00229		447.115	0.000834566		682.986	0.57729		682.999	0.86066		682.987	0.90404
447.51	0.00326		447.51	0.000834566		682.01	0.5393		681.987	0.90208		682.011	0.93908
447.904	0.00203		447.904	0.000341413		680.999	0.50235		681.011	0.93498		681	0.96984
448.299	0.000763087		448.299	0.000227609		679.987	0.4684		679.999	0.96057		679.987	0.98962
448.693	0.00040698		448.693	-0.000151739		679.011	0.43659		678.986	0.97919		679.011	0.9998
449.087	0.000152617		449.087	0.000189674		677.998	0.40919		678.01	0.99202		677.998	1
449.481	0.000864832		449.481	0.000531088		676.985	0.3858		676.996	0.99858		676.985	0.99558
449.874	0.000864832		449.874	0.000910436		676.008	0.36766		675.983	0.99863		676.008	0.98583
450.268	0.000915704		450.268	0.000379348		674.995	0.35378		675.005	0.994		674.994	0.97377
450.661	0.000254362		450.661	-0.000417283		674.017	0.34343		673.991	0.98593		674.016	0.95464
451.055	0.000559597		451.055	-0.000341413		673.003	0.33386		673.013	0.97338		673.002	0.93464
451.448	0.000966577		451.448	-0.000151739		671.989	0.32537		671.998	0.95616		671.987	0.91169
451.841	0.000508725		451.841	0		671.01	0.31885		670.983	0.9308		671.009	0.88505
452.234	0.00137		452.234	0.000303479		669.995	0.31517		670.004	0.89972		669.993	0.85343
452.627	0.00234		452.627	3.79348e-05		669.016	0.31301		668.988	0.8639		669.014	0.81777
453.02	0.00234		453.02	-0.000834566		668	0.31102		668.008	0.8254		667.998	0.78111
453.412	0.00229		453.412	-0.000910436		666.984	0.30809		666.992	0.78285		667.018	0.74414
453.805	0.00214		453.805	3.79348e-05		666.004	0.30593		666.012	0.73819		666.002	0.70085
454.197	0.00117		454.197	0.000417283		664.988	0.30455		664.995	0.6903		664.985	0.65633
454.589	0.000915704		454.589	0.000948371		664.007	0.30455		664.014	0.64202		664.004	0.61312
454.981	0.000152617		454.981	0.00106		662.99	0.30328		662.996	0.59602		662.986	0.57091
455.373	0.000457852		455.373	0.000189674		662.009	0.30133		662.015	0.5543		662.005	0.53388
455.765	0.000559597		455.765	-0.000379348		660.991	0.29798		660.996	0.51366		660.987	0.49806
456.156	0.00122		456.156	-0.000455218		660.009	0.29516		660.014	0.47566		660.005	0.46507
456.548	0.00244		456.548	-7.58697e-05		658.991	0.29096		658.995	0.44106		658.986	0.43327
456.939	0.00361		456.939	0.000872501		658.008	0.28637		658.013	0.40987		658.004	0.40634
457.33	0.00402		457.33	-0.000113804		656.989	0.28103		656.993	0.38343		656.984	0.37886
457.721	0.00346		457.721	-0.00156		656.006	0.27601		656.01	0.36172		656.001	0.35663
458.112	0.0032		458.112	-0.00129		654.986	0.27108		654.99	0.34363		655.018	0.33498
458.503	0.0027		458.503	-0.000682827		654.003	0.26683		654.006	0.32793		653.997	0.32091
458.894	0.00203		458.894	-0.000227609		652.982	0.26321		652.986	0.31425		653.013	0.30627
459.284	0.00219		459.284	-7.58697e-05		651.998	0.25871		652.001	0.3023		651.992	0.2951
459.675	0.00173		459.675	0.000341413		651.014	0.25352		651.016	0.292		651.008	0.28525
460.065	0.00193		460.065	-0.000531088		649.993	0.24784		649.995	0.28257		649.986	0.27778
460.455	0.00198		460.455	-0.00102		649.008	0.24275		649.009	0.2772		649.001	0.27224
460.845	0.00148		460.845	-0.000493153		647.986	0.23893		647.987	0.27359		648.016	0.26774
461.235	0.000559597		461.235	0.000341413		647	0.23671		647.001	0.27057		646.993	0.26541
461.624	-0.00040698		461.624	0.000910436		646.014	0.23386		646.015	0.269		646.007	0.26343
462.014	0.000356107		462.014	0.000910436		644.992	0.23079		644.992	0.26859		644.984	0.26207
462.403	0.00107		462.403	0.000569022		644.005	0.22923		644.005	0.26874		643.998	0.26329
462.793	0.000864832		462.793	0.000948371		642.982	0.22803		642.982	0.27136		643.011	0.26482
463.182	0.000712214		463.182	0.0019		641.995	0.22652		641.994	0.27468		641.987	0.26723
463.571	-0.000356107		463.571	0.00175		641.008	0.22507		641.007	0.27807		640.999	0.26872
463.96	-0.000356107		463.96	0.00121		639.983	0.22209		639.982	0.28259		640.012	0.27191
464.349	-0.000559597		464.349	0.00118		638.995	0.21724		638.994	0.28677		638.987	0.27505
464.737	-0.00040698		464.737	0.000986306		638.007	0.21345		638.006	0.29087		637.998	0.27721
465.126	0.000763087		465.126	0.00114		636.982	0.21138		637.017	0.29566		637.01	0.27993
465.514	0.00148		465.514	0.000606957		635.993	0.21012		635.991	0.30007		635.984	0.28329
465.902	0.00224		465.902	0.000265544		635.005	0.21075		635.002	0.3021		634.995	0.28578
466.29	0.00188		466.29	0.00106		634.015	0.21057		634.012	0.30447		634.005	0.2869
466.678	0.000508725		466.678	0.00167		632.989	0.2072		632.986	0.30612		633.016	0.28798
467.066	0.000101745		467.066	0.00125		631.999	0.20232		631.995	0.30878		631.989	0.28941
467.454	0.00158		467.454	0		631.009	0.199		631.005	0.31135		630.998	0.28956
467.841	0.00198		467.841	-0.000151739		629.982	0.19711		630.014	0.31464		630.008	0.28983
468.229	0.00229		468.229	0.000227609		628.991	0.19548		628.986	0.31587		629.017	0.29017
468.616	0.00305		468.616	0.000986306		628	0.19267		627.995	0.3151		627.989	0.28901
469.003	0.00203		469.003	0.0011		627.009	0.18809		627.004	0.31299		626.998	0.28819
469.39	0.000864832		469.39	0.000644892		626.017	0.18322		626.012	0.31112		626.006	0.28705
469.777	0.000508725		469.777	3.79348e-05		624.989	0.18026		624.983	0.30856		625.014	0.28529
470.164	-0.000661342		470.164	-0.00125		623.997	0.17919		623.99	0.30713		623.985	0.28251
470.551	-0.00061047		470.551	-0.00114		623.004	0.17735		622.998	0.3058		622.992	0.27961
470.937	0.000864832		470.937	-0.000569022		622.012	0.17414		622.005	0.30382		621.999	0.27691
471.323	0.00198		471.323	0.000151739		620.982	0.17078		621.012	0.30115		621.006	0.27217
471.71	0.00178		471.71	0.000493153		619.989	0.16772		620.018	0.29787		620.013	0.26958
472.096	0.00178		472.096	0.000606957		618.995	0.16531		618.987	0.29447		618.982	0.26542
472.482	0.00214		472.482	0.000531088		618.001	0.16329		617.993	0.28962		617.988	0.26001
472.867	0.00219		472.867	0.000113804		617.007	0.16112		616.999	0.28491		616.994	0.25464
473.253	0.00229		473.253	7.58697e-05		616.013	0.1581		616.004	0.28031		616	0.24974
473.639	0.00295		473.639	0.000948371		614.982	0.15524		615.01	0.27543		615.005	0.24327
474.024	0.00382		474.024	0.00114		613.987	0.15173		614.014	0.27014		614.01	0.23807
474.409	0.00259		474.409	0.000227609		612.992	0.14876		612.982	0.26619		613.014	0.23307
474.794	0.00183		474.794	-0.000379348		611.996	0.14807		611.986	0.26231		611.982	0.22624
475.179	0.00234		475.179	-0.00118		611.001	0.14913		610.99	0.25497		610.986	0.221
475.564	0.00168		475.564	-0.000569022		610.005	0.14877		609.994	0.2459		609.99	0.21566
475.949	0.00148		475.949	0.000948371		609.009	0.14585		608.998	0.23816		608.994	0.20997
476.334	0.00137		476.334	0.00121		608.012	0.14117		608.001	0.23408		607.997	0.20484
476.718	0.00102		476.718	0.000379348		607.015	0.13671		607.004	0.23278		607	0.20094
477.102	0.000813959		477.102	7.58697e-05		605.982	0.13471		606.007	0.23114		606.003	0.19762
477.487	0.000661342		477.487	-0.000341413		604.984	0.13468		605.009	0.22453		605.005	0.19399
477.871	0.000101745		477.871	0.000227609		603.987	0.1344		604.011	0.21683		604.008	0.19101
478.255	0.000152617		478.255	0.000948371		602.989	0.13271		603.013	0.2111		603.009	0.18869
478.638	0		478.638	0.000720762		601.991	0.13103		602.015	0.20938		602.011	0.18664
479.022	0.000661342		479.022	0.000151739		600.993	0.12878		601.016	0.20905		601.013	0.18562
479.406	0.00107		479.406	-0.000303479		599.994	0.12508		600.017	0.21217		600.014	0.18404
479.789	0.00209		479.789	-7.58697e-05		598.995	0.121		599.018	0.21144		599.015	0.18323
480.172	0.0027		480.172	0.000379348		597.996	0.11769		597.982	0.20817		598.016	0.18292
480.555	0.0029		480.555	0.000948371		596.997	0.11456		596.982	0.20457		597.016	0.18196
480.938	0.00326		480.938	0.000872501		595.997	0.11183		595.982	0.20052		596.016	0.18132
481.321	0.00326		481.321	0.000872501		594.997	0.10974		594.982	0.19799		595.016	0.18053
481.704	0.00341		481.704	0.000682827		593.997	0.10817		594.018	0.20032		594.016	0.18022
482.086	0.0029		482.086	-0.000113804		592.997	0.10659		593.018	0.20071		593.015	0.17908
482.469	0.00315		482.469	0		591.996	0.10536		592.017	0.19951		592.014	0.17862
482.851	0.0027		482.851	0.000796631		590.995	0.10323		591.015	0.19744		591.013	0.17704
483.233	0.00198		483.233	0.00114		589.994	0.10019		590.014	0.19492		590.012	0.17555
483.615	0.00158		483.615	0.000644892		588.992	0.09788		589.012	0.19239		589.01	0.17398
483.997	0.00112		483.997	0.000834566		587.991	0.09789		588.01	0.19036		588.008	0.17248
484.379	0.000966577		484.379	0.00137		586.988	0.09802		587.008	0.18918		587.006	0.17092
484.761	0.000508725		484.761	0.000986306		585.986	0.09753		586.005	0.18732		586.003	0.16906
485.142	0.00112		485.142	-0.000113804		584.984	0.09553		585.002	0.18521		585.001	0.16701
485.524	0.00158		485.524	-0.000379348		584.018	0.09289		583.999	0.18341		583.998	0.16441
485.905	0.00188		485.905	-0.000644892		583.015	0.09023		582.996	0.18092		582.995	0.16229
486.286	0.00178		486.286	-0.000682827		582.012	0.08919		581.992	0.17869		581.991	0.15963
486.667	0.00137		486.667	-0.000189674		581.008	0.08895		580.989	0.17625		580.987	0.15646
487.048	0.00163		487.048	0		580.005	0.08867		579.985	0.17405		579.983	0.15472
487.429	0.00188		487.429	-0.000758697		579.001	0.08832		579.017	0.17143		579.016	0.15119
487.809	0.00239		487.809	-0.000758697		577.996	0.08809		578.013	0.16915		578.012	0.14817
488.19	0.003		488.19	-3.79348e-05		576.992	0.08668		577.008	0.16471		577.007	0.14414
488.57	0.003		488.57	0.00125		575.987	0.08478		576.003	0.16022		576.002	0.14092
488.95	0.00254		488.95	0.00125		574.982	0.08303		574.997	0.15651		574.997	0.13753
489.33	0.00229		489.33	0.00106		574.014	0.08135		573.992	0.15175		573.991	0.1334
489.71	0.00198		489.71	0.00114		573.008	0.07922		572.986	0.14561		572.986	0.13038
490.09	0.00153		490.09	0.000872501		572.003	0.07782		572.017	0.1401		572.017	0.1267
490.469	0.000864832		490.469	0.000834566		570.997	0.07707		571.011	0.13349		571.011	0.12347
490.849	0.000152617		490.849	0.000644892		569.99	0.07717		570.004	0.13059		570.004	0.11992
491.228	0.000152617		491.228	0.000758697		568.984	0.07749		568.997	0.13086		568.997	0.11739
491.607	0.00020349		491.607	0.000758697		568.014	0.07803		567.99	0.12806		567.99	0.11474
491.987	0.00061047		491.987	0.000265544		567.007	0.07772		566.983	0.12258		566.983	0.11167
492.365	0.00132		492.365	0.000265544		566	0.0778		566.013	0.1167		566.013	0.10943
492.744	0.00148		492.744	0.000455218		564.992	0.07806		565.005	0.11211		565.005	0.10729
493.123	0.00188		493.123	0.000189674		563.985	0.07784		563.997	0.11138		563.997	0.10481
493.502	0.00249		493.502	-0.000569022		563.014	0.07582		562.989	0.11171		562.989	0.10385
493.88	0.00285		493.88	-0.000872501		562.006	0.07395		562.017	0.11041		562.018	0.10266
494.258	0.00249		494.258	-0.000113804		560.997	0.07371		561.008	0.1072		561.009	0.10165
494.636	0.00178		494.636	0.000948371		559.988	0.07493		559.999	0.10517		560	0.10103
495.014	0.00107		495.014	0.000493153		559.017	0.07599		558.99	0.10393		558.991	0.10093
495.392	0.00168		495.392	-0.000227609		558.008	0.07666		558.018	0.10435		557.982	0.09966
495.77	0.003		495.77	-0.000417283		556.998	0.07617		557.008	0.10395		557.009	0.1001
496.148	0.00239		496.148	7.58697e-05		555.988	0.07483		555.998	0.10559		556	0.09956
496.525	0.00224		496.525	0.00129		555.016	0.07401		554.988	0.10547		554.989	0.09996
496.903	0.00239		496.903	0.00152		554.006	0.07434		554.015	0.10452		554.016	0.10126
497.28	0.00219		497.28	0.000910436		552.995	0.07504		553.004	0.10387		553.006	0.10268
497.657	0.00163		497.657	0.000265544		551.984	0.0756		551.993	0.10392		551.995	0.10392
498.034	0.00173		498.034	-0.000303479		551.011	0.07577		550.982	0.10483		550.984	0.10518
498.411	0.00153		498.411	3.79348e-05		550	0.07476		550.008	0.1108		550.01	0.10687
498.787	0.00173		498.787	0.000113804		548.988	0.07301		548.996	0.11343		548.998	0.10953
499.164	0.00234		499.164	-0.000303479		548.014	0.07166		547.984	0.11276		547.986	0.11139
499.54	0.00239		499.54	-7.58697e-05		547.002	0.07136		547.009	0.11365		547.012	0.11418
499.917	0.00127		499.917	0.000758697		545.99	0.07109		545.997	0.11522		545.999	0.11675
500.293	0.00137		500.293	0.00152		545.015	0.07118		544.984	0.11795		544.987	0.12034
500.669	0.00173		500.669	0.00129		544.003	0.07113		544.009	0.1262		544.012	0.12385
501.045	0.00183		501.045	0.00106		542.99	0.07066		542.996	0.12351		542.999	0.12684
501.42	0.00229		501.42	0.000758697		542.014	0.06956		541.982	0.1176		541.985	0.13019
501.796	0.00168		501.796	0.000720762		541.001	0.06866		541.006	0.11428		541.009	0.1335
502.172	0.00127		502.172	0.000758697		539.987	0.0689		539.993	0.11796		539.996	0.13817
502.547	0.000864832		502.547	0.000455218		539.011	0.07038		539.016	0.12394		538.982	0.14255
502.922	0.00153		502.922	0.000341413		537.997	0.07244		538.002	0.13052		538.005	0.14694
503.297	0.00209		503.297	3.79348e-05		536.983	0.07331		536.987	0.13247		536.991	0.15174
503.672	0.00214		503.672	0.000113804		536.006	0.07285		536.01	0.13654		536.013	0.15653
504.047	0.00234		504.047	0.000910436		534.991	0.07119		534.995	0.13609		534.999	0.16339
504.422	0.00117		504.422	0.00106		534.014	0.07004		534.017	0.13793		533.983	0.16969
504.796	0.00127		504.796	0.000796631		532.999	0.06949		533.002	0.13869		533.006	0.17375
505.171	0.00178		505.171	0.000455218		531.983	0.06909		531.986	0.14445		531.99	0.18081
505.545	0.00209		505.545	-0.000151739		531.005	0.06841		531.008	0.15334		531.012	0.18755
505.919	0.00198		505.919	-0.000796631		529.99	0.06834		529.992	0.15635		529.996	0.19547
506.293	0.00163		506.293	-0.00137		529.011	0.06901		529.013	0.15557		529.017	0.20269
506.667	0.000966577		506.667	-0.000910436		527.995	0.07014		527.996	0.15321		528.001	0.20998
507.041	0.00158		507.041	0.000265544		527.016	0.07215		527.017	0.15041		526.984	0.21852
507.414	0.00168		507.414	0.00102		525.999	0.07353		526	0.15724		526.005	0.22505
507.788	0.00188		507.788	0.000682827		524.982	0.07397		524.983	0.16472		524.987	0.23403
508.161	0.00153		508.161	0.00118		524.003	0.07315		524.003	0.16832		524.008	0.24388
508.534	0.00198		508.534	0.00156		522.985	0.07234		522.985	0.17704		522.99	0.25366
508.907	0.000559597		508.907	0.000758697		522.005	0.07159		522.005	0.18712		522.01	0.26324
509.28	0.000559597		509.28	3.79348e-05		520.987	0.07249		520.987	0.19484		520.992	0.27341
509.653	0.00061047		509.653	-0.000455218		520.007	0.07371		520.006	0.19987		520.011	0.28365
510.026	0.00148		510.026	-0.000341413		518.988	0.07494		518.987	0.20408		518.993	0.2945
510.398	0.00198		510.398	-0.000455218		518.008	0.07572		518.006	0.20835		518.012	0.30467
510.771	0.00203		510.771	-0.000341413		516.989	0.07686		516.987	0.21487		516.993	0.31723
511.143	0.00163		511.143	-0.000493153		516.008	0.0775		516.006	0.22564		516.011	0.32775
511.515	0.00214		511.515	-0.000569022		514.988	0.07885		514.986	0.23874		514.992	0.33912
511.887	0.00305		511.887	-0.000569022		514.007	0.0806		514.004	0.2482		514.01	0.34939
512.259	0.0027		512.259	-0.000796631		512.987	0.08339		512.984	0.25667		512.99	0.36195
512.631	0.00219		512.631	0.000189674		512.005	0.08582		512.002	0.26535		512.008	0.37334
513.002	0.00107		513.002	0.000872501		510.985	0.08829		510.981	0.27366		510.987	0.38495
513.374	0.00132		513.374	0.000682827		510.002	0.08992		509.998	0.2824		510.004	0.39587
513.745	0.00168		513.745	0.00121		508.981	0.0922		509.015	0.29153		508.984	0.40691
514.117	0.00239		514.117	0.000986306		507.998	0.09562		507.994	0.30036		508.001	0.41802
514.488	0.00229		514.488	0.000606957		507.015	0.10162		507.011	0.31002		507.017	0.42933
514.859	0.000508725		514.859	0.00121		505.994	0.10866		505.989	0.32055		505.996	0.44088
515.229	0.000661342		515.229	0.00133		505.01	0.11625		505.005	0.32926		505.012	0.45235
515.6	0.00153		515.6	0.000227609		503.989	0.12296		503.983	0.33742		503.99	0.46258
515.971	0.00209		515.971	-0.000189674		503.005	0.12936		502.999	0.3444		503.006	0.47271
516.341	0.00234		516.341	3.79348e-05		501.983	0.13629		502.014	0.35306		501.984	0.48285
516.711	0.00209		516.711	0.000113804		500.998	0.14584		500.992	0.361		500.999	0.49213
517.081	0.00219		517.081	0.000113804		500.014	0.15767		500.007	0.36904		500.014	0.50217
517.451	0.003		517.451	-0.000113804		498.991	0.17143		498.984	0.37275		498.991	0.51036
517.821	0.00254		517.821	0		498.006	0.18569		497.999	0.37376		498.006	0.51761
518.191	0.00351		518.191	0.000948371		496.983	0.20116		497.013	0.37379		496.983	0.52417
518.561	0.00219		518.561	0.000265544		495.997	0.21901		495.989	0.37533		495.997	0.53064
518.93	0.00102		518.93	7.58697e-05		495.011	0.23996		495.003	0.38375		495.011	0.5367
519.3	0.000864832		519.3	0.000606957		493.988	0.262		494.017	0.389		493.987	0.54281
519.669	0.00127		519.669	0.000758697		493.002	0.28466		492.993	0.38401		493.001	0.54704
520.038	0.0028		520.038	0.00114		492.015	0.30815		492.006	0.37849		492.014	0.54884
520.407	0.00371		520.407	0.00118		490.991	0.33491		490.982	0.37682		490.99	0.55187
520.776	0.00315		520.776	0.00175		490.004	0.3655		489.995	0.37541		490.003	0.55493
521.144	0.00209		521.144	0.00167		489.017	0.3995		489.007	0.37564		489.016	0.55675
521.513	0.00163		521.513	0.000910436		487.992	0.43486		487.982	0.37243		487.99	0.55886
521.881	0.00219		521.881	-3.79348e-05		487.005	0.47063		486.994	0.37544		487.003	0.56013
522.25	0.00158		522.25	3.79348e-05		486.017	0.50603		486.007	0.37331		486.015	0.56203
522.618	0.00168		522.618	0.000493153		484.992	0.54242		485.019	0.37172		484.989	0.5636
522.986	0.0027		522.986	0.000379348		484.004	0.58066		483.992	0.36679		484.001	0.56408
523.354	0.00249		523.354	0.000113804		483.016	0.62076		483.004	0.35798		483.013	0.566
523.721	0.00158		523.721	0.000303479		481.989	0.66235		482.015	0.35698		481.987	0.56824
524.089	0.00168		524.089	0.000910436		481.001	0.70411		480.989	0.36944		480.998	0.57054
524.457	0.00249		524.457	0.00133		480.012	0.74499		480	0.37485		480.009	0.57309
524.824	0.00249		524.824	0.000493153		478.985	0.78501		479.01	0.37856		478.982	0.5772
525.191	0.00239		525.191	-0.000341413		477.996	0.82466		477.983	0.38116		477.993	0.57996
525.558	0.00188		525.558	-0.000455218		477.007	0.86268		476.993	0.38362		477.003	0.58402
525.925	0.00107		525.925	-0.000227609		476.017	0.89817		476.004	0.38767		476.013	0.58801
526.292	0.000966577		526.292	0		474.989	0.93036		475.014	0.39196		474.985	0.59272
526.659	0.00178		526.659	-0.000493153		473.999	0.95977		473.985	0.39736		473.995	0.59792
527.025	0.00219		527.025	0.000113804		473.009	0.98719		472.995	0.40277		473.005	0.6024
527.392	0.00295		527.392	0.000606957		471.981	1.01242		472.004	0.40807		472.015	0.60766
527.758	0.00326		527.758	0.000834566		470.991	1.03487		471.014	0.41351		470.986	0.61297
528.124	0.00244		528.124	0.000644892		470	1.0548		469.985	0.41928		469.995	0.61788
528.49	0.0029		528.49	0.000872501		469.009	1.07238		468.993	0.42329		469.004	0.62361
528.856	0.0031		528.856	0.000948371		468.018	1.0882		468.002	0.42722		468.013	0.62893
529.222	0.0031		529.222	0.000151739		466.989	1.10324		467.011	0.43042		466.983	0.63485
529.587	0.00341		529.587	-0.000379348		465.997	1.11742		466.019	0.43338		465.992	0.64102
529.953	0.00331		529.953	0.000189674		465.006	1.13023		464.989	0.43682		465	0.64578
530.318	0.00315		530.318	0.00114		464.014	1.14233		463.997	0.44253		464.008	0.65207
530.684	0.00265		530.684	0.000682827		462.984	1.15403		463.004	0.45237		463.016	0.66018
531.049	0.0031		531.049	-7.58697e-05		461.991	1.16558		462.012	0.4582		461.985	0.66823
531.414	0.00275		531.414	-0.000265544		460.999	1.17704		460.981	0.46171		460.993	0.67846
531.778	0.00219		531.778	-0.000189674		460.006	1.18861		459.988	0.46653		460	0.68836
532.143	0.00229		532.143	0.000341413		459.014	1.20025		458.995	0.47416		459.007	0.70307
532.508	0.0032		532.508	0.000455218		457.983	1.21248		458.002	0.48725		458.014	0.71924
532.872	0.00371		532.872	0.000417283		456.989	1.22549		457.009	0.50996		456.982	0.74102
533.236	0.003		533.236	0.00114		455.996	1.23874		456.015	0.53642		455.989	0.76852
533.601	0.00259		533.601	0.000872501		455.003	1.25179		454.983	0.56687		454.995	0.80306
533.965	0.00148		533.965	-0.000265544		454.009	1.26381		453.989	0.59923		454.001	0.8412
534.329	0.00178		534.329	-0.000265544		453.015	1.27422		452.995	0.63656		453.007	0.87883
534.692	0.0028		534.692	0.000151739		451.983	1.28349		452	0.67985		452.013	0.92503
535.056	0.00244		535.056	-0.000417283		450.988	1.29174		451.006	0.73222		451.018	0.98013
535.42	0.00188		535.42	-0.000341413		449.994	1.29873		450.011	0.79694		449.985	1.04345
535.783	0.00112		535.783	-0.000417283		448.999	1.30381		449.016	0.86555		448.991	1.10713
536.146	0.000559597		536.146	-0.000872501		448.004	1.30586		447.983	0.93106		447.996	1.16238
536.509	-0.000356107		536.509	-0.000872501		447.009	1.30507		446.988	0.99736		447	1.21537
536.872	-0.00132		536.872	-0.000379348		446.014	1.30245		445.992	1.0654		446.005	1.27029
537.235	-0.00173		537.235	-0.000113804		445.019	1.29856		444.996	1.13465		445.01	1.32517
537.598	-0.000712214		537.598	-0.000265544		443.985	1.29281		444.001	1.20656		444.014	1.37589
537.96	0.000915704		537.96	0.000151739		442.989	1.28451		443.005	1.26887		443.018	1.4134
538.323	0.00198		538.323	3.79348e-05		441.993	1.27316		442.008	1.31873		441.984	1.4426
538.685	0.00219		538.685	-0.000151739		440.997	1.25922		441.012	1.35813		440.987	1.45851
539.047	0.00178		539.047	0.000531088		440.001	1.24344		440.016	1.38746		439.991	1.4716
539.409	0.00229		539.409	0.000113804		439.005	1.22666		439.019	1.4078		438.994	1.47875
539.771	0.00214		539.771	-0.000569022		438.008	1.20945		437.984	1.42138		437.997	1.47704
540.133	0.00173		540.133	-0.000341413		437.011	1.19166		436.986	1.42314		437	1.47343
540.495	0.000966577		540.495	-0.000189674		436.014	1.17323		435.989	1.41696		436.003	1.46448
540.856	-0.000101745		540.856	-7.58697e-05		435.017	1.15365		434.992	1.40118		435.006	1.44884
541.218	0.00020349		541.218	-0.000341413		433.981	1.13383		433.994	1.37837		434.008	1.43172
541.579	0.000457852		541.579	7.58697e-05		432.984	1.11427		432.996	1.35113		433.011	1.41192
541.94	0.00127		541.94	-0.000265544		431.986	1.0969		431.998	1.32096		432.013	1.39391
542.301	0.00229		542.301	-0.000379348		430.988	1.08143		431	1.29378		431.015	1.37791
542.662	0.00173		542.662	-0.000265544		429.99	1.06804		430.002	1.26979		430.017	1.36204
543.023	0.000661342		543.023	-0.000227609		428.992	1.05565		429.003	1.24693		429.018	1.34799
543.383	0.000559597		543.383	0.000265544		427.994	1.04477		428.005	1.22789		427.981	1.34019
543.744	0.00112		543.744	0.000758697		426.995	1.0346		427.006	1.21232		426.982	1.33056
544.104	0.00158		544.104	0.000986306		425.996	1.02634		426.007	1.1975		425.984	1.32656
544.464	0.00137		544.464	0.00144		424.997	1.01935		425.008	1.18624		424.984	1.32423
544.824	0.000305235		544.824	0.00106		423.998	1.01504		424.008	1.1801		423.985	1.32065
545.184	0.00102		545.184	0		422.999	1.01255		423.009	1.17378		422.986	1.32178
545.544	0.00117		545.544	-0.000872501		421.999	1.01202		422.009	1.16997		421.986	1.32032
545.904	0.00117		545.904	-0.000948371		421	1.01136		421.009	1.16738		420.986	1.31746
546.263	0.00112		546.263	-0.000986306		420	1.01074		420.009	1.16319		419.986	1.31455
546.623	0.00158		546.623	-0.000948371		419	1.00975		419.009	1.15921		418.986	1.30927
546.982	0.00188		546.982	-0.00163		418	1.01018		418.008	1.15533		417.986	1.30397
547.341	0.00127		547.341	-0.00118		417	1.01203		417.008	1.14599		416.985	1.29258
547.7	0.00137		547.7	3.79348e-05		415.999	1.01534		416.007	1.13385		415.985	1.27839
548.059	0.00203		548.059	0.000265544		414.999	1.01936		415.006	1.11938		414.984	1.26403
548.418	0.00209		548.418	7.58697e-05		413.998	1.02455		414.005	1.10378		413.983	1.24703
548.776	0.00203		548.776	0.000417283		412.997	1.03104		413.004	1.08692		412.982	1.22764
549.135	0.0032		549.135	0.000872501		411.996	1.03846		412.002	1.06428		412.019	1.20376
549.493	0.0027		549.493	3.79348e-05		410.994	1.04634		411.001	1.03799		411.018	1.1782
549.851	0.000915704		549.851	-0.000151739		409.993	1.05303		409.999	1.00914		410.016	1.15374
550.21	0.00102		550.21	0.000720762		408.991	1.05954		408.997	0.98126		409.014	1.12851
550.567	0.00229		550.567	0.00144		407.989	1.06703		407.995	0.95464		408.012	1.10385
550.925	0.0031		550.925	0.00163		406.987	1.07503		406.993	0.92791		407.01	1.07604
551.283	0.00295		551.283	0.000872501		405.985	1.08187		405.99	0.90022		406.008	1.05242
551.641	0.00224		551.641	0.000872501		404.983	1.08745		404.988	0.8751		405.005	1.02977
551.998	0.00107		551.998	0.000986306		404.019	1.09071		403.985	0.85362		404.003	1.01103
552.355	0.00137		552.355	0.000493153		403.016	1.09206		402.982	0.83635		403	0.99488
552.712	0.00122		552.712	0.000189674		402.014	1.09056		402.018	0.82111		401.997	0.97898
553.069	0.00203		553.069	0.000531088		401.011	1.08672		401.014	0.80858		400.994	0.96465
553.426	0.00112		553.426	0.000531088		400.007	1.08052		400.011	0.79879		399.99	0.95317
553.783	0.000661342		553.783	-3.79348e-05
554.14	0.00178		554.14	-0.000227609
554.496	0.00249		554.496	-0.000379348
554.853	0.00239		554.853	-0.000341413
555.209	0.00229		555.209	-0.000682827
555.565	0.00203		555.565	-0.000379348
555.921	0.00234		555.921	0.000341413
556.277	0.00229		556.277	0.000758697
556.633	0.00203		556.633	0.000910436
556.988	0.00173		556.988	0.000948371
557.344	0.00148		557.344	0.000948371
557.699	0.000559597		557.699	0.000569022
558.054	0.000508725		558.054	0
558.409	0.000864832		558.409	-0.000113804
558.764	0.00142		558.764	0.000682827
559.119	0.00158		559.119	0.000644892
559.473	0.00188		559.473	0.000379348
559.828	0.00168		559.828	0.000303479
560.182	0.00183		560.182	0.000265544
560.537	0.00285		560.537	0.000379348
560.891	0.00209		560.891	0.000493153
561.245	0.000966577		561.245	-3.79348e-05
561.599	0.00102		561.599	-0.000796631
561.952	0.00122		561.952	-0.000417283
562.306	0.00193		562.306	-0.000682827
562.659	0.00178		562.659	-0.000682827
563.013	0.000966577		563.013	0.000265544
563.366	0.000101745		563.366	0.000531088
563.719	0.000763087		563.719	3.79348e-05
564.072	0.00219		564.072	-0.000644892
564.425	0.00331		564.425	-0.000113804
564.778	0.00361		564.778	0.000151739
565.13	0.0032		565.13	-0.000113804
565.483	0.00188		565.483	-0.000303479
565.835	0.00168		565.835	-0.000493153
566.187	0.00259		566.187	0.000265544
566.539	0.00361		566.539	-0.000265544
566.891	0.00371		566.891	-0.000796631
567.243	0.0028		567.243	-0.000796631
567.594	0.00244		567.594	-0.000265544
567.946	0.00244		567.946	0.000113804
568.297	0.00188		568.297	0.00118
568.648	0.00193		568.648	0.0011
569	0.00193		569	0.000303479
569.351	0.00229		569.351	-0.000303479
569.701	0.00331		569.701	-0.000341413
570.052	0.00392		570.052	-0.000151739
570.403	0.003		570.403	-7.58697e-05
570.753	0.00249		570.753	-0.000113804
571.103	0.00178		571.103	0
571.454	0.0027		571.454	0.000265544
571.804	0.003		571.804	0.000265544
572.154	0.0029		572.154	0.000569022
572.503	0.00209		572.503	0.00133
572.853	0.00137		572.853	0.00114
573.203	0.00112		573.203	0.00106
573.552	0.00198		573.552	0.00121
573.901	0.00198		573.901	0.000417283
574.25	0.00183		574.25	0.000227609
574.599	0.00249		574.599	-0.000113804
574.948	0.00285		574.948	-0.000796631
575.297	0.00219		575.297	-0.000834566
575.646	0.00158		575.646	-0.000227609
575.994	0.00127		575.994	0.000455218
576.342	0.00117		576.342	0.00102
576.691	0.00198		576.691	0.00118
577.039	0.0027		577.039	0.00114
577.387	0.00285		577.387	0.000872501
577.735	0.00249		577.735	0.000682827
578.082	0.00259		578.082	0.00102
578.43	0.0029		578.43	0.000910436
578.777	0.00259		578.777	0.000455218
579.125	0.00214		579.125	0.000113804
579.472	0.00239		579.472	-3.79348e-05
579.819	0.00249		579.819	-0.000758697
580.166	0.00295		580.166	-0.000303479
580.512	0.00341		580.512	0.00102
580.859	0.003		580.859	0.00201
581.206	0.003		581.206	0.00133
581.552	0.003		581.552	0.000606957
581.898	0.00249		581.898	0.000910436
582.244	0.00214		582.244	-0.000151739
582.59	0.00158		582.59	0.000569022
582.936	0.00148		582.936	0.0011
583.282	0.00142		583.282	0.00106
583.628	0.00178		583.628	0.00171
583.973	0.00315		583.973	0.000986306
584.318	0.00295		584.318	0.000948371
584.664	0.00173		584.664	0.000606957
585.009	0.00275		585.009	3.79348e-05
585.354	0.00371		585.354	0.000758697
585.698	0.00412		585.698	0.00163
586.043	0.00514		586.043	0.000189674
586.388	0.00443		586.388	-0.000417283
586.732	0.0031		586.732	0.000796631
587.076	0.00351		587.076	0.000834566
587.421	0.00392		587.421	0.000455218
587.765	0.00458		587.765	0.000682827
588.108	0.00499		588.108	0.00125
588.452	0.00509		588.452	0.0014
588.796	0.006		588.796	0.000796631
589.139	0.00555		589.139	0.000758697
589.483	0.00483		589.483	0.00102
589.826	0.00382		589.826	0.00102
590.169	0.00407		590.169	0.00152
590.512	0.00438		590.512	0.00205
590.855	0.00478		590.855	0.00239
591.198	0.00616		591.198	0.00228
591.54	0.00717		591.54	0.0019
591.883	0.00733		591.883	0.00197
592.225	0.00921		592.225	0.00178
592.567	0.00977		592.567	0.0014
592.909	0.01267		592.909	0.000644892
593.251	0.01582		593.251	0.000606957
593.593	0.01903		593.593	0.000796631
593.935	0.02274		593.935	0.00205
594.276	0.02579		594.276	0.0019
594.618	0.02788		594.618	0.000986306
594.959	0.03042		594.959	0.00231
595.3	0.03424		595.3	0.0022
595.641	0.03871		595.641	0.00156
595.982	0.04406		595.982	0.00186
596.323	0.04889		596.323	0.00186
596.663	0.05337		596.663	0.00254
597.004	0.05922		597.004	0.00269
597.344	0.06395		597.344	0.00334
597.685	0.07224		597.685	0.00391
598.025	0.08129		598.025	0.0047
598.365	0.08999		598.365	0.00527
598.705	0.10007		598.705	0.00482
599.044	0.11212		599.044	0.0041
599.384	0.12123		599.384	0.00421
599.723	0.12998		599.723	0.00413
600.063	0.14056		600.063	0.00398
600.402	0.15236		600.402	0.00402
600.741	0.16437		600.741	0.00425
601.08	0.17627		601.08	0.00413
601.419	0.18848		601.419	0.00429
601.757	0.19998		601.757	0.00542
602.096	0.20924		602.096	0.00539
602.434	0.2213		602.434	0.00592
602.773	0.23681		602.773	0.00664
603.111	0.25019		603.111	0.00664
603.449	0.26321		603.449	0.0069
603.787	0.27888		603.787	0.00675
604.125	0.29323		604.125	0.0069
604.462	0.3064		604.462	0.00789
604.8	0.32212		604.8	0.00835
605.137	0.33581		605.137	0.00751
605.474	0.34812		605.474	0.00687
605.811	0.3642		605.811	0.00744
606.148	0.3819		606.148	0.00823
606.485	0.39553		606.485	0.00865
606.822	0.4051		606.822	0.00929
607.159	0.42026		607.159	0.00998
607.495	0.4342		607.495	0.00983
607.831	0.44834		607.831	0.0102
608.168	0.46441		608.168	0.01066
608.504	0.47876		608.504	0.01077
608.84	0.49351		608.84	0.01085
609.175	0.50969		609.175	0.0113
609.511	0.52567		609.511	0.01248
609.847	0.53798		609.847	0.01244
610.182	0.54703		610.182	0.01263
610.517	0.5595		610.517	0.01457
610.853	0.57226		610.853	0.01555
611.188	0.58524		611.188	0.01517
611.523	0.59984		611.523	0.01521
611.857	0.60879		611.857	0.01635
612.192	0.61942		612.192	0.01711
612.526	0.63199		612.526	0.01794
612.861	0.64318		612.861	0.01931
613.195	0.653		613.195	0.02075
613.529	0.6645		613.529	0.02105
613.863	0.67564		613.863	0.02174
614.197	0.68673		614.197	0.02189
614.531	0.69761		614.531	0.02219
614.864	0.70575		614.864	0.02337
615.198	0.71461		615.198	0.02477
615.531	0.71837		615.531	0.02576
615.865	0.72692		615.865	0.0253
616.198	0.73918		616.198	0.02534
616.531	0.74701		616.531	0.02701
616.863	0.76009		616.863	0.02913
617.196	0.7695		617.196	0.03054
617.529	0.77586		617.529	0.03164
617.861	0.77901		617.861	0.03316
618.193	0.78191		618.193	0.0341
618.526	0.78837		618.526	0.0349
618.858	0.79549		618.858	0.03653
619.19	0.80241		619.19	0.03748
619.521	0.80806		619.521	0.03831
619.853	0.81493		619.853	0.04078
620.185	0.81915		620.185	0.04234
620.516	0.82495		620.516	0.044
620.847	0.83202		620.847	0.04473
621.178	0.83975		621.178	0.04537
621.509	0.84769		621.509	0.04768
621.84	0.85674		621.84	0.04954
622.171	0.86036		622.171	0.05102
622.502	0.85969		622.502	0.05216
622.832	0.86061		622.832	0.05444
623.163	0.86509		623.163	0.05618
623.493	0.87373		623.493	0.05724
623.823	0.87811		623.823	0.05876
624.153	0.88014		624.153	0.06047
624.483	0.88544		624.483	0.06331
624.812	0.88844		624.812	0.06604
625.142	0.89093		625.142	0.06938
625.472	0.89495		625.472	0.07227
625.801	0.89744		625.801	0.07466
626.13	0.89703		626.13	0.07735
626.459	0.90075		626.459	0.0808
626.788	0.90517		626.788	0.08361
627.117	0.90833		627.117	0.08592
627.446	0.90955		627.446	0.08843
627.774	0.91448		627.774	0.09104
628.103	0.91367		628.103	0.09347
628.431	0.91352		628.431	0.09658
628.759	0.91489		628.759	0.10068
629.087	0.92013		629.087	0.10387
629.415	0.92496		629.415	0.10538
629.743	0.92858		629.743	0.10872
630.07	0.93264		630.07	0.11206
630.398	0.93341		630.398	0.11582
630.725	0.93534		630.725	0.11984
631.053	0.93514		631.053	0.12534
631.38	0.9388		631.38	0.13031
631.707	0.94445		631.707	0.13296
632.034	0.94429		632.034	0.13611
632.36	0.94541		632.36	0.14025
632.687	0.94938		632.687	0.1437
633.014	0.94913		633.014	0.14954
633.34	0.94852		633.34	0.15584
633.666	0.94714		633.666	0.1602
633.992	0.94592		633.992	0.16422
634.318	0.94918		634.318	0.17055
634.644	0.95203		634.644	0.17625
634.97	0.95416		634.97	0.17962
635.295	0.95544		635.295	0.18402
635.621	0.95549		635.621	0.18869
635.946	0.95386		635.946	0.19404
636.271	0.95869		636.271	0.19935
636.596	0.96205		636.596	0.20432
636.921	0.95895		636.921	0.2075
637.246	0.95884		637.246	0.21259
637.571	0.96007		637.571	0.21945
637.895	0.95915		637.895	0.22651
638.22	0.95737		638.22	0.23174
638.544	0.95895		638.544	0.23823
638.868	0.96139		638.868	0.24616
639.192	0.96312		639.192	0.25287
639.516	0.96709		639.516	0.26035
639.84	0.97126		639.84	0.26892
640.164	0.97212		640.164	0.27624
640.487	0.97299		640.487	0.2814
640.811	0.96927		640.811	0.28675
641.134	0.96495		641.134	0.29422
641.457	0.96826		641.457	0.30299
641.78	0.96754		641.78	0.31277
642.103	0.96546		642.103	0.32078
642.426	0.96846		642.426	0.32825
642.748	0.9709		642.748	0.33804
643.071	0.97243		643.071	0.34726
643.393	0.97339		643.393	0.35625
643.715	0.97227		643.715	0.36508
644.038	0.97614		644.038	0.37578
644.359	0.97446		644.359	0.38511
644.681	0.97497		644.681	0.39581
645.003	0.97935		645.003	0.40852
645.325	0.98194		645.325	0.4207
645.646	0.9797		645.646	0.43341
645.967	0.97863		645.967	0.44513
646.289	0.98021		646.289	0.45825
646.61	0.98153		646.61	0.47327
646.931	0.98301		646.931	0.4889
647.252	0.98372		647.252	0.5037
647.572	0.98392		647.572	0.51398
647.893	0.98331		647.893	0.52487
648.213	0.98499		648.213	0.54186
648.534	0.98647		648.534	0.5573
648.854	0.9884		648.854	0.57118
649.174	0.99074		649.174	0.58772
649.494	0.98815		649.494	0.60517
649.813	0.9852		649.813	0.62133
650.133	0.98423		650.133	0.63723
650.453	0.98794		650.453	0.65309
650.772	0.99166		650.772	0.66762
651.091	0.99115		651.091	0.68309
651.411	0.98911		651.411	0.70172
651.73	0.99217		651.73	0.72042
652.048	0.99603		652.048	0.7365
652.367	0.99924		652.367	0.751
652.686	0.99725		652.686	0.7697
653.004	0.99578		653.004	0.78939
653.323	0.99618		653.323	0.80615
653.641	0.99664		653.641	0.82136
653.959	0.99573		653.959	0.83737
654.277	0.99863		654.277	0.85259
654.595	1		654.595	0.86666
654.913	0.99852		654.913	0.88039
655.23	0.99934		655.23	0.89443
655.548	0.99644		655.548	0.90668
655.865	0.9944		655.865	0.92182
656.182	0.99466		656.182	0.93767
656.499	0.99914		656.499	0.94993
656.816	0.99807		656.816	0.95941
657.133	0.99705		657.133	0.97007
657.45	0.99674		657.45	0.98228
657.767	0.99318		657.767	0.99101
658.083	0.99217		658.083	0.99541
658.399	0.9939		658.399	1
658.716	0.99328		658.716	0.99807
659.032	0.9939		659.032	0.9915
659.348	0.99105		659.348	0.98672
659.663	0.98815		659.663	0.98039
659.979	0.98698		659.979	0.97064
660.295	0.98825		660.295	0.95937
660.61	0.98647		660.61	0.94564
660.925	0.98321		660.925	0.92758
661.241	0.98866		661.241	0.90251
661.556	0.99186		661.556	0.88134
661.871	0.98657		661.871	0.85786
662.185	0.98504		662.185	0.82774
662.5	0.98469		662.5	0.79565
662.815	0.97868		662.815	0.76351
663.129	0.97584		663.129	0.73184
663.443	0.97467		663.443	0.69857
663.757	0.9706		663.757	0.6617
664.071	0.96658		664.071	0.62816
664.385	0.96876		664.385	0.59319
664.699	0.96795		664.699	0.56071
665.013	0.95823		665.013	0.53132
665.326	0.95386		665.326	0.49983
665.64	0.94984		665.64	0.46967
665.953	0.94613		665.953	0.44262
666.266	0.94282		666.266	0.41668
666.579	0.94175		666.579	0.39278
666.892	0.94277		666.892	0.36816
667.205	0.93855		667.205	0.34665
667.517	0.93244		667.517	0.32495
667.83	0.92618		667.83	0.30431
668.142	0.92013		668.142	0.28622
668.454	0.91408		668.454	0.26903
668.766	0.90512		668.766	0.25234
669.078	0.89357		669.078	0.23622
669.39	0.89032		669.39	0.22325
669.702	0.89164		669.702	0.21012
670.014	0.88508		670.014	0.19825
670.325	0.87404		670.325	0.18721
670.636	0.86626		670.636	0.17662
670.948	0.8572		670.948	0.16748
671.259	0.85084		671.259	0.1583
671.57	0.84464		671.57	0.1509
671.88	0.83507		671.88	0.14339
672.191	0.82332		672.191	0.1341
672.502	0.81228		672.502	0.1253
672.812	0.8017		672.812	0.11862
673.122	0.79183		673.122	0.11267
673.433	0.78542		673.433	0.10614
673.743	0.77642		673.743	0.10087
674.053	0.76538		674.053	0.09651
674.362	0.75205		674.362	0.09157
674.672	0.73729		674.672	0.08569
674.982	0.72636		674.982	0.07936
675.291	0.71476		675.291	0.07447
675.6	0.70453		675.6	0.07128
675.91	0.69222		675.91	0.06897
676.219	0.67655		676.219	0.06532
676.528	0.65971		676.528	0.06221
676.836	0.64384		676.836	0.05952
677.145	0.62746		677.145	0.05554
677.454	0.61373		677.454	0.05193
677.762	0.60009		677.762	0.04928
678.07	0.58651		678.07	0.04643
678.378	0.5714		678.378	0.04325
678.686	0.55237		678.686	0.04154
678.994	0.53976		678.994	0.04032
679.302	0.525		679.302	0.03778
679.61	0.50628		679.61	0.03608
679.917	0.48771		679.917	0.03433
680.225	0.46782		680.225	0.03183
680.532	0.45093		680.532	0.02967
680.839	0.43471		680.839	0.02838
681.146	0.41863		681.146	0.02784
681.453	0.40479		681.453	0.02686
681.76	0.39004		681.76	0.025
682.066	0.37147		682.066	0.02325
682.373	0.35188		682.373	0.02177
682.679	0.33408		682.679	0.02079
682.985	0.31658		682.985	0.02007
683.292	0.29928		683.292	0.01965
683.597	0.28275		683.597	0.01756
683.903	0.26499		683.903	0.01631
684.209	0.24811		684.209	0.01658
684.515	0.23055		684.515	0.01643
684.82	0.21473		684.82	0.01593
685.126	0.19937		685.126	0.01544
685.431	0.18243		685.431	0.01442
685.736	0.16783		685.736	0.014
686.041	0.15608		686.041	0.01347
686.346	0.14341		686.346	0.0129
686.65	0.12906		686.65	0.01214
686.955	0.11823		686.955	0.01153
687.259	0.10826		687.259	0.01001
687.564	0.09854		687.564	0.00929
687.868	0.08837		687.868	0.00899
688.172	0.07819		688.172	0.00789
688.476	0.0699		688.476	0.00846
688.78	0.06303		688.78	0.00914
689.084	0.05626		689.084	0.00907
689.387	0.04986		689.387	0.00926
689.691	0.04512		689.691	0.00827
689.994	0.041		689.994	0.00785
690.297	0.03821		690.297	0.00781
690.6	0.03546		690.6	0.00762
690.903	0.03281		690.903	0.00744
691.206	0.02966		691.206	0.00744
691.509	0.02671		691.509	0.00694
691.811	0.02457		691.811	0.00645
692.114	0.02315		692.114	0.00626
692.416	0.02121		692.416	0.00634
692.718	0.01872		692.718	0.00584
693.02	0.0176		693.02	0.00542
693.322	0.01857		693.322	0.00508
693.624	0.01959		693.624	0.00497
693.925	0.01842		693.925	0.00558
694.227	0.01714		694.227	0.00535
694.528	0.01704		694.528	0.00489
694.83	0.01633		694.83	0.00516
695.131	0.01613		695.131	0.00531
695.432	0.01633		695.432	0.00425
695.733	0.01592		695.733	0.00448
696.034	0.01577		696.034	0.00516
696.334	0.01506		696.334	0.00558
696.635	0.01491		696.635	0.0052
696.935	0.0145		696.935	0.00478
697.235	0.01465		697.235	0.00383
697.536	0.01491		697.536	0.00357
697.836	0.01414		697.836	0.00334
698.136	0.0144		698.136	0.00262
698.435	0.01491		698.435	0.00247
698.735	0.01613		698.735	0.00315
699.034	0.01653		699.034	0.00296
699.334	0.01669		699.334	0.00364
699.633	0.01775		699.633	0.00368
699.932	0.01775		699.932	0.00262
700.231	0.01704		700.231	0.00262
700.53	0.01587		700.53	0.0036
700.829	0.01694		700.829	0.00383
701.128	0.01882		701.128	0.00303
701.426	0.01964		701.426	0.00193
701.724	0.01898		701.724	0.00114
702.023	0.01903		702.023	0.000606957
702.321	0.01821		702.321	0.00114
702.619	0.01806		702.619	0.00216
702.917	0.01796		702.917	0.00231
703.214	0.01765		703.214	0.00224
703.512	0.01765		703.512	0.00228
703.81	0.0175		703.81	0.00178
704.107	0.0175		704.107	0.00171
704.404	0.01791		704.404	0.0019
704.701	0.01857		704.701	0.00186
704.998	0.01847		704.998	0.0019
705.295	0.01831		705.295	0.00163
705.592	0.01857		705.592	0.000910436
705.888	0.01801		705.888	0.000417283
706.185	0.01811		706.185	0.000493153
706.481	0.01816		706.481	0.0011
706.778	0.01791		706.778	0.0014
707.074	0.01735		707.074	0.00152
707.37	0.01623		707.37	0.00212
707.665	0.01653		707.665	0.00216
707.961	0.01623		707.961	0.00156
708.257	0.01541		708.257	0.000986306
708.552	0.01552		708.552	0.00102
708.848	0.01389		708.848	0.00133
709.143	0.01257		709.143	0.00163
709.438	0.01216		709.438	0.00167
709.733	0.01262		709.733	0.00167
710.028	0.01241		710.028	0.00193
710.322	0.0119		710.322	0.00106
710.617	0.01089		710.617	0.00133
710.911	0.01033		710.911	0.00186
711.206	0.00936		711.206	0.0022
711.5	0.00814		711.5	0.00144
711.794	0.00753		711.794	0.000569022
712.088	0.00605		712.088	0.000948371
712.382	0.00468		712.382	0.000606957
712.676	0.00382		712.676	0.000303479
712.969	0.0031		712.969	0.000910436
713.263	0.00259		713.263	0.00159
713.556	0.00214		713.556	0.00133
713.849	0.00178		713.849	0.0014
714.142	0.00188		714.142	0.00182
714.435	0.00163		714.435	0.0019
714.728	0.00178		714.728	0.00125
715.021	0.00117		715.021	0.000758697
715.313	0.00117		715.313	0.000531088
715.606	0.00219		715.606	-0.000303479
715.898	0.00203		715.898	-0.000796631
716.19	0.00249		716.19	-0.000265544
716.482	0.00326		716.482	0.000227609
716.774	0.003		716.774	0.000682827
717.066	0.00193		717.066	0.000834566
717.358	0.0027		717.358	0.000151739
717.649	0.00305		717.649	-0.000113804
717.941	0.00346		717.941	0.00171
718.232	0.00397		718.232	0.00277
718.523	0.00453		718.523	0.00171
718.814	0.00407		718.814	0.00209
719.105	0.003		719.105	0.00231
719.396	0.00188		719.396	0.000910436
719.687	0.00214		719.687	0.000151739
719.977	0.00315		719.977	-0.000227609
720.268	0.00351		720.268	0.000265544
720.558	0.0031		720.558	0.000569022
720.848	0.00193		720.848	0.00125
721.138	0.00275		721.138	0.0014
721.428	0.0029		721.428	0.000303479
721.718	0.00295		721.718	0.000303479
722.008	0.00249		722.008	0.000910436
722.297	0.00224		722.297	0.00102
722.587	0.0031		722.587	0.000910436
722.876	0.00432		722.876	0.00118
723.165	0.00524		723.165	0.000151739
723.454	0.00443		723.454	-0.000455218
723.743	0.00438		723.743	0.000303479
724.032	0.0032		724.032	0.000948371
724.321	0.00366		724.321	0.000872501
724.609	0.00392		724.609	0.000682827
724.898	0.00351		724.898	0.000986306
725.186	0.0032		725.186	0.00152
725.474	0.003		725.474	0.00193
725.762	0.00361		725.762	0.00163
726.05	0.00422		726.05	0.00159
726.338	0.00407		726.338	0.00167
726.626	0.00361		726.626	0.00144
726.913	0.00341		726.913	0.00118
727.2	0.00417		727.2	0.00144
727.488	0.00458		727.488	0.00186
727.775	0.00376		727.775	0.00156
728.062	0.00249		728.062	0.00156
728.349	0.00249		728.349	0.0025
728.636	0.00351		728.636	0.0019
728.922	0.00387		728.922	0.00148
729.209	0.00376		729.209	0.00167
729.495	0.00336		729.495	0.00171
729.782	0.00249		729.782	0.00125
730.068	0.0027		730.068	0.00118
730.354	0.0031		730.354	0.000303479
730.64	0.0032		730.64	0.00133
730.926	0.00249		730.926	0.00216
731.211	0.00265		731.211	0.00224
731.497	0.00275		731.497	0.00258
731.782	0.00203		731.782	0.00247
732.067	0.00203		732.067	0.00163
732.353	0.00315		732.353	0.0014
732.638	0.00402		732.638	0.000796631
732.923	0.00443		732.923	0.000455218
733.207	0.00458		733.207	0.000379348
733.492	0.00427		733.492	0.000758697
733.777	0.00493		733.777	0.00102
734.061	0.00514		734.061	0.000682827
734.345	0.00376		734.345	0.000455218
734.629	0.00417		734.629	0.000834566
734.913	0.00397		734.913	0.000493153
735.197	0.00371		735.197	3.79348e-05
735.481	0.00361		735.481	0.000341413
735.765	0.00402		735.765	0.000720762
736.048	0.00361		736.048	0.000644892
736.332	0.00412		736.332	0.000189674
736.615	0.00432		736.615	0
736.898	0.00366		736.898	0.000189674
737.181	0.00387		737.181	0.000113804
737.464	0.00315		737.464	0.000113804
737.747	0.00254		737.747	0.00114
738.03	0.00382		738.03	0.0022
738.312	0.00539		738.312	0.00121
738.595	0.0059		738.595	0.000606957
738.877	0.00595		738.877	0.000493153
739.159	0.00656		739.159	-3.79348e-05
739.441	0.00717		739.441	0.000265544
739.723	0.00722		739.723	0.000379348
740.005	0.00697		740.005	0.000379348
740.286	0.00595		740.286	0.000379348
740.568	0.00422		740.568	0.000189674
740.849	0.00412		740.849	-0.000341413
741.131	0.00376		741.131	-3.79348e-05
741.412	0.00422		741.412	0.000531088
741.693	0.00483		741.693	0.000682827
741.974	0.0059		741.974	0.00121
742.255	0.00616		742.255	0.00175
742.535	0.00565		742.535	0.00129
742.816	0.00473		742.816	0.000682827
743.096	0.00392		743.096	0.000910436
743.376	0.00397		743.376	0.000606957
743.657	0.0031		743.657	0.000758697
743.937	0.00305		743.937	0.000644892
744.217	0.00346		744.217	-3.79348e-05
744.496	0.00402		744.496	0.000379348
744.776	0.00453		744.776	0.000948371
745.056	0.00524		745.056	0.000986306
745.335	0.00555		745.335	3.79348e-05
745.614	0.00468		745.614	-0.00102
745.893	0.00432		745.893	-0.00125
746.173	0.00519		746.173	-0.000986306
746.451	0.00646		746.451	-0.000151739
746.73	0.00575		746.73	0.000796631
747.009	0.0059		747.009	0.00133
747.287	0.00616		747.287	0.00125
747.566	0.0058		747.566	0.00144
747.844	0.00575		747.844	0.00137
748.122	0.00636		748.122	0.00118
748.4	0.00646		748.4	0.000644892
748.678	0.00605		748.678	0.000569022
748.956	0.00453		748.956	0.000682827
749.234	0.00478		749.234	0.00121
749.511	0.00555		749.511	0.000417283
749.789	0.00575		749.789	-0.000417283
750.066	0.00631		750.066	-0.000265544
750.343	0.00575		750.343	0.000303479
750.62	0.00529		750.62	0.000417283
750.897	0.0059		750.897	0.000682827
751.174	0.00677		751.174	0.000720762
751.451	0.00646		751.451	0.000379348
751.727	0.00616		751.727	0.000531088
752.004	0.00549		752.004	0.000341413
752.28	0.00524		752.28	-0.000113804
752.556	0.00397		752.556	-0.000379348
752.832	0.0032		752.832	-0.000644892
753.108	0.00453		753.108	-0.000227609
753.384	0.00514		753.384	0.000151739
753.66	0.00575		753.66	0.000379348
753.935	0.00621		753.935	0.000303479
754.211	0.00692		754.211	0.000303479
754.486	0.00677		754.486	0.000493153
754.761	0.0058		754.761	0.000113804
755.036	0.00555		755.036	0.000189674
755.311	0.00687		755.311	0.00148
755.586	0.00646		755.586	0.00178
755.861	0.00529		755.861	0.00137
756.135	0.00473		756.135	0.000720762
756.41	0.0032		756.41	0
756.684	0.0029		756.684	0.000265544
756.958	0.003		756.958	0.000606957
757.232	0.00305		757.232	0.00175
757.506	0.00376		757.506	0.00178
757.78	0.00412		757.78	0.00178
758.054	0.00361		758.054	0.00186
758.327	0.00326		758.327	0.00228
758.601	0.00397		758.601	0.0014
758.874	0.00463		758.874	0.0011
759.147	0.00453		759.147	0.00182
759.42	0.00458		759.42	0.00133
759.693	0.00453		759.693	0.000493153
759.966	0.00427		759.966	0.000910436
760.239	0.00463		760.239	0.00129
760.511	0.00366		760.511	0.00156
760.784	0.00371		760.784	0.0019
761.056	0.00371		761.056	0.00163
761.328	0.0032		761.328	0.00152
761.6	0.00249		761.6	0.00175
761.872	0.00331		761.872	0.000531088
762.144	0.0029		762.144	-0.000303479
762.416	0.0031		762.416	0.000720762
762.688	0.0027		762.688	0.000834566
762.959	0.0029		762.959	0.00106
763.23	0.003		763.23	0.000644892
763.502	0.00209		763.502	0.000910436
763.773	0.00188		763.773	0.000569022
764.044	0.00188		764.044	-3.79348e-05
764.314	0.00285		764.314	0.000417283
764.585	0.0031		764.585	0.000644892
764.856	0.00198		764.856	0.000303479
765.126	0.0029		765.126	0.00159
765.397	0.0032		765.397	0.00243
765.667	0.00244		765.667	0.00209
765.937	0.00229		765.937	0.00247
766.207	0.00107		766.207	0.00205
766.477	0.000356107		766.477	0.000948371
766.746	0.00102		766.746	0.000113804
767.016	0.00137		767.016	-0.000341413
767.286	0.00168		767.286	-0.000644892
767.555	0.00188		767.555	0.000151739
767.824	0.00295		767.824	0.000531088
768.093	0.00356		768.093	0.000227609
768.362	0.00331		768.362	-7.58697e-05
768.631	0.00168		768.631	-0.000189674
768.9	0.000864832		768.9	-0.000796631
769.168	0.00158		769.168	-0.000303479
769.437	0.00193		769.437	0.000531088
769.705	0.00203		769.705	0.000531088
769.974	0.00193		769.974	0.00102
770.242	0.00112		770.242	0.00148
770.51	0.000763087		770.51	0.000644892
770.778	0.00153		770.778	0.000758697
771.045	0.00249		771.045	0.0011
771.313	0.0027		771.313	0.00102
771.58	0.0028		771.58	0.00152
771.848	0.00371		771.848	0.00125
772.115	0.00422		772.115	0.000720762
772.382	0.00285		772.382	0.00106
772.649	0.0028		772.649	0.00102
772.916	0.0029		772.916	0.000834566
773.183	0.003		773.183	0.00118
773.45	0.00285		773.45	0.00121
773.716	0.00315		773.716	0.00216
773.982	0.00392		773.982	0.00178
774.249	0.00412		774.249	0.00114
774.515	0.00366		774.515	0.00121
774.781	0.00275		774.781	0.000948371
775.047	0.00259		775.047	0.000379348
775.313	0.0028		775.313	-0.000455218
775.578	0.00315		775.578	-0.000151739
775.844	0.00259		775.844	0
776.109	0.00239		776.109	-0.000303479
776.374	0.00275		776.374	-3.79348e-05
776.64	0.00239		776.64	0
776.905	0.00193		776.905	0.000113804
777.17	0.00168		777.17	7.58697e-05
777.434	0.00239		777.434	0.000872501
777.699	0.00326		777.699	0.0014
777.964	0.00224		777.964	0.00106
778.228	0.00132		778.228	0.00118
778.492	0.00107		778.492	0.000493153
778.756	0.00158		778.756	-0.000303479
779.021	0.00244		779.021	-7.58697e-05
779.284	0.00427		779.284	-0.000113804
779.548	0.00443		779.548	-0.000644892
779.812	0.00239		779.812	-0.00159
780.076	0.000559597		780.076	-0.00125
780.339	0.000457852		780.339	-0.000569022
780.602	0.00148		780.602	-0.000606957
780.865	0.00239		780.865	-0.000720762
781.129	0.0029		781.129	-0.00114
781.391	0.00259		781.391	-0.000455218
781.654	0.00203		781.654	3.79348e-05
781.917	0.00148		781.917	0.00118
782.18	0.00198		782.18	0.00178
782.442	0.00219		782.442	0.00106
782.704	0.00203		782.704	0.000758697
782.967	0.00178		782.967	-0.000113804
783.229	0.0027		783.229	0
783.491	0.00285		783.491	0.000265544
783.752	0.00193		783.752	0.000303479
784.014	0.00239		784.014	3.79348e-05
784.276	0.00219		784.276	0
784.537	0.00158		784.537	0.000189674
784.799	0.00229		784.799	-0.000189674
785.06	0.0032		785.06	-0.000379348
785.321	0.00341		785.321	0
785.582	0.0032		785.582	0.000303479
785.843	0.00305		785.843	-7.58697e-05
786.103	0.00341		786.103	0.000417283
786.364	0.00387		786.364	0.000720762
786.625	0.00361		786.625	3.79348e-05
786.885	0.00259		786.885	-7.58697e-05
787.145	0.00259		787.145	0.000189674
787.405	0.00295		787.405	0.000189674
787.665	0.00244		787.665	0.000227609
787.925	0.00239		787.925	0.000151739
788.185	0.00137		788.185	0.000948371
788.444	0.000864832		788.444	0.00129
788.704	0.000763087		788.704	0.000682827
788.963	0.00122		788.963	0.00114
789.223	0.00117		789.223	0.00125
789.482	0.00127		789.482	0.000948371
789.741	0.00137		789.741	0.000113804
790	0.00203		790	0.000455218
790.258	0.00214		790.258	0.000796631
790.517	0.00249		790.517	0.000493153
790.776	0.00244		790.776	0.000455218
791.034	0.00183		791.034	0.000379348
791.292	0.00163		791.292	0.000758697
791.55	0.00234		791.55	0.00159
791.808	0.00198		791.808	0.00205
792.066	0.000966577		792.066	0.000986306
792.324	0.00168		792.324	0.000720762
792.582	0.00203		792.582	0.000872501
792.839	0.000763087		792.839	0.000455218
793.097	-0.000101745		793.097	0.000379348
793.354	0.000508725		793.354	0.000151739
793.611	0.00158		793.611	-3.79348e-05
793.868	0.00153		793.868	-0.000455218
794.125	0.00142		794.125	3.79348e-05
794.382	0.000661342		794.382	0.000872501
794.639	0.00061047		794.639	0.000227609
794.895	0.00163		794.895	-0.000227609
795.152	0.00295		795.152	0.000531088
795.408	0.0032		795.408	0.000606957
795.664	0.0028		795.664	0.000227609
795.92	0.00219		795.92	0.000417283
796.176	0.00239		796.176	0.000872501
796.432	0.00234		796.432	0.000720762
796.688	0.00219		796.688	0.0011
796.943	0.00193		796.943	0.000303479
797.199	0.00229		797.199	0.000644892
797.454	0.00193		797.454	0.00144
797.709	0.00132		797.709	0.00148
797.964	0.00209		797.964	0.00156
798.219	0.00249		798.219	0.00205
798.474	0.00198		798.474	0.00182
798.729	0.0027		798.729	0.00129
798.984	0.0032		798.984	0.00102
799.238	0.00387		799.238	7.58697e-05
799.492	0.00376		799.492	-0.000303479
799.747	0.00305		799.747	0.000379348
800.001	0.00259		800.001	0.000379348

## Sheet: Saturation curves 
µmol O2/ml/mg Chl												A. marina				FR C. thermalis
	A. marina 1		A. marina 2		A. marina 3		WL C. thermalis	FR C. thermalis 1	FR C. thermalis 2				LED 660 nm	Xenon lamp			LED 660 nm	Xenon lamp
Light int (µE )	Acceptors	DCMU+Histidine	Acceptors	DCMU+Histidine	Acceptors	DCMU+Histidine	Acceptors	Acceptors	Acceptors			-60	0.000729023	-0.000175292		-60	0.000864652	0.000189114
0	0	0	0	0	0	0	0	0	0			-59.5	0.000226049	-0.000402942		-59.5	0.000356062	-0.000200512
430												-59	-0.000117353	6.64077e-05		-59	-0.000172242	0.000247863
770									41.5			-58.5	0.000201474	-0.000440242		-58.5	-0.000409146	-0.000141762
1050									74			-58	0.000456243	3.01074e-05		-58	0.00012015	-0.000112387
2450	183.107	-134.943	80.32	-113.467	120.745	-92.88	101.761	77.6311	109			-57.5	-0.000322188	-0.000337543		-57.5	-0.000368183	-8.30123e-05
3400			133.76	-158.987	216.395	-131.307	113.608		132			-57	2.43242e-05	-7.19286e-06		-57	0.000124771	8.53625e-05
7100	258.821	-202.851	204.534	-187.92	288.16	-147.147	131.891	129.297	131.5			-56.5	-8.7478e-05	-0.000234843		-56.5	-2.0705e-05	-2.42626e-05
												-56	-7.99087e-05	-4.34931e-05		-56	-0.000129952	5.11219e-06
												-55.5	0.000334346	-0.000272143		-55.5	0.00039883	0.000173487
												-55	8.67441e-05	5.92066e-05		-55	-0.000228703	-0.000215138
												-54.5	0.000174142	-2.94435e-05		-54.5	0.000415822	0.000232237
												-54	-0.000272975	-0.000118094		-54	-0.000431425	-0.000296389
												-53.5	-0.000321148	7.32562e-05		-53.5	-0.000453272	0.000290986
												-53	8.92496e-05	-0.000294394		-53	7.16808e-05	-0.000237639
												-52.5	-0.000266581	3.59559e-05		-52.5	-2.5709e-05	0.000210736
												-52	-0.000179269	-0.000330694		-52	0.000471101	0.000100111
												-51.5	-0.000921471	-3.44362e-07		-51.5	-0.000300889	-9.51441e-06
												-51	-0.000626759	-8.89945e-05		-51	-0.000394078	0.00015886
												-50.5	0.000481867	-3.76446e-05		-50.5	3.14462e-05	-0.000230765
												-50	0.000473665	1.37052e-05		-50	2.97421e-05	-6.13899e-05
												-49.5	0.000561206	6.50551e-05		-49.5	0.000466467	-0.000172015
												-49	-0.000320854	0.000116405		-49	-0.000384866	-0.00028164
												-48.5	-0.000544513	2.87548e-05		-48.5	-0.000466142	-0.000113265
												-48	0.000137085	8.01047e-05		-48	-2.08456e-05	-0.000222891
												-47.5	0.00018054	-0.000148545		-47.5	-1.83211e-05	-5.45158e-05
												-47	0.000247938	0.000321804		-47	0.000546403	-0.000304141
												-46.5	-0.000729522	-0.000184846		-46.5	-0.000205072	0.000144234
												-46	-0.000761838	0.000285504		-46	-0.000338548	-0.000245391
												-45.5	4.34169e-05	-0.000222146		-45.5	4.65197e-05	0.000202983
												-45	7.09576e-05	0.000388204		-45	-0.000214613	-4.66417e-05
												-44.5	0.000222355	2.05537e-05		-44.5	0.00026274	0.000121733
												-44	-0.000946932	0.000210904		-44	-0.000780021	1.21079e-05
												-43.5	-0.000708106	0.000402253		-43.5	-0.000642297	0.000180483
												-43	0.000188863	3.46033e-05		-43	-0.000189344	0.000209858
												-42.5	8.49467e-05	0.000504953		-42.5	-0.000130933	-0.000178768
												-42	0.000403573	0.000137303		-42	0.000457591	0.000129607
												-41.5	-0.00125	0.000467653		-41.5	-0.000321799	-0.000260018
												-41	-0.000630488	0.000101003		-41	-6.01312e-05	4.83569e-05
												-40.5	-0.00109	0.000291353		-40.5	0.000305536	-0.000201268
												-40	-0.000718807	0.000203702		-40	0.000179918	-0.000311893
												-39.5	0.000146334	0.000673052		-39.5	0.000632785	-0.000142519
												-39	0.000169817	0.000166402		-39	-0.000450262	-0.000253144
												-38.5	0.000137501	7.77521e-05		-38.5	-0.000108709	-8.3769e-05
												-38	-0.000915873	0.000269102		-38	-0.000193899	-0.000194394
												-37.5	-0.000624989	0.000180452		-37.5	-0.000175603	0.000114981
												-37	5.27799e-05	0.000511802		-37	0.000289265	-0.000414645
												-36.5	0.000272035	0.000283152		-36.5	-0.000378411	3.37303e-05
												-36	0.000167947	0.000614501		-36	1.88852e-05	-0.000355895
												-35.5	-0.000770227	-3.21487e-05		-35.5	5.32398e-06	9.24799e-05
												-35	-0.000774886	0.000577201		-35	-8.00087e-05	-0.000157145
												-34.5	5.45118e-05	0.000209551		-34.5	0.000273373	1.12296e-05
												-34	0.000122052	0.000679901		-34	-0.00023096	4.06044e-05
												-33.5	4.1936e-05	0.000591251		-33.5	0.000213993	-6.90208e-05
												-33	-0.00101	0.000503601		-33	0.000140518	0.000239354
												-32.5	-0.00080824	0.00083395		-32.5	-2.48147e-05	-0.000150271
												-32	0.000164529	0.0003273		-32	0.000340567	0.000158104
												-31.5	0.000327299	0.00065765		-31.5	-0.000143766	-0.000370521
												-31	0.000203354	0.00015		-31	0.000377016	-0.000202147
												-30.5	-0.000853963	0.00048135		-30.5	8.43118e-05	-3.27718e-05
												-30	-0.000742565	0.0002527		-30	-0.000160307	-0.000143397
												-29.5	-2.53957e-05	0.00044405		-29.5	0.000312761	2.59778e-05
												-29	-3.76836e-05	7.63995e-05		-29	-0.000235715	-0.000223647
												-28.5	0.000265486	0.000406749		-28.5	0.000376924	8.47275e-05
												-28	-0.000779745	0.000179099		-28	-9.90371e-05	-0.000304898
												-27.5	-0.000576862	0.000230449		-27.5	-0.000124655	0.000283477
												-27	-0.000242521	0.000141799		-27	0.000288155	-0.000106148
												-26.5	-9.94659e-05	0.000193149		-26.5	3.10507e-05	6.22267e-05
												-26	0.000175589	0.000384499		-26	0.000643689	-4.73984e-05
												-25.5	-0.000658327	0.000156849		-25.5	-0.000111643	-0.000158024
												-25	-0.000164215	0.000487198		-25	-0.000160919	1.13512e-05
												-24.5	0.000206268	0.000259548		-24.5	0.000156377	-0.000238274
												-24	0.000361752	0.000589898		-24	2.2816e-05	0.000209101
												-23.5	0.000341435	0.000222248		-23.5	0.000500055	-0.000319524
												-23	-0.000556738	0.000692598		-23	-0.000151706	0.000128851
												-22.5	-0.000282141	0.000324948		-22.5	-0.000173553	-0.000260775
												-22	-0.000138971	0.000516298		-22	9.18283e-05	4.76002e-05
												-21.5	-0.000139002	0.000427647		-21.5	1.04957e-05	7.6975e-05
												-21	-0.000151318	0.000618997		-21	0.00045942	-0.00031265
												-20.5	-0.000770064	0.000530347		-20.5	-0.000271998	0.000135725
												-20	-0.000403809	0.000442697		-20	-0.000337045	-0.000253901
												-19.5	-0.000280468	0.000773047		-19.5	0.000112022	0.000194474
												-19	-0.000176842	0.000265397		-19	3.8461e-05	-0.000195151
												-18.5	-5.64368e-06	0.000875747		-18.5	0.000415843	0.000114224
												-18	-0.000480732	0.000368096		-18	-0.000383633	-0.000136401
												-17.5	-7.05623e-05	0.000838446		-17.5	-0.000433594	-0.000107026
												-17	-0.000206365	0.000331796		-17	0.000206702	-7.76516e-05
												-16.5	-0.000266367	0.000802146		-16.5	3.36835e-05	-0.000187277
												-16	0.000152031	0.000294496		-16	0.000674322	0.000121098
												-15.5	-0.000211714	0.00104		-15.5	-0.000360296	-0.000128527
												-15	3.34105e-06	0.000676196		-15	-0.000186372	0.000179848
												-14.5	-0.000236118	0.000448546		-14.5	-8.64708e-06	-6.97775e-05
												-14	-0.000296349	0.00134		-14	-9.80654e-05	0.000238597
												-13.5	0.000285677	0.000272245		-13.5	0.00030303	0.000127972
												-13	-0.000205268	0.000463595		-13	-0.000380445	0.000157347
												-12.5	-7.03556e-05	0.000932945		-12.5	-9.09205e-05	4.77218e-05
												-12	-0.000454015	0.00112		-12	0.000354461	-6.29034e-05
												-11.5	-0.000207103	-8.03553e-05		-11.5	0.000173043	0.000245471
												-11	0.000327095	0.000109995		-11	0.000478396	-0.000143154
												-10.5	-0.000195936	2.23444e-05		-10.5	-0.000680165	-0.000113779
												-10	1.91478e-05	-6.63057e-05		-10	-0.000386412	-0.000224404
												-9.5	-0.000591169	0.000125044		-9.5	-0.000339974	-0.000335029
												-9	-0.000539542	3.6394e-05		-9	-0.000417306	-0.000165654
												-8.5	0.000205856	8.77439e-05		-8.5	0.000187361	-0.00027628
												-8	-4.20038e-05	-9.06269e-07		-8	-0.000452886	0.000172095
												-7.5	0.000268537	0.000190444		-7.5	-0.000103561	-0.00021753
												-7	-0.000629465	-3.72065e-05		-7	4.64775e-05	0.000230845
												-6.5	-0.00041441	0.000153143		-6.5	0.000176631	-0.00015878
												-6	0.000295216	-0.000353507		-6	0.000398155	0.000150594
												-5.5	0.0003109	0.000116843		-5.5	-0.000353463	3.99693e-05
												-5	0.000470297	-0.000250807		-5	-2.01102e-05	0.000209344
												-4.5	-0.000575219	7.95428e-05		-4.5	6.27146e-06	0.000238719
												-4	-0.000376335	0.000130893		-4	-0.000123118	-1.19062e-05
												-3.5	0.000293662	-9.67575e-05		-3.5	0.000381692	0.000297469
												-3	0.000492774	9.45924e-05		-3	-9.49265e-05	-9.21566e-05
												-2.5	0.000468172	-0.000273058		-2.5	0.000262741	7.62183e-05
												-2	-0.000489573	5.72921e-05		-2	0.000101465	-0.000312407
												-1.5	-0.000513661	-0.000310358		-1.5	-0.000111667	-4.0321e-06
												-1	0.000295651	1.99918e-05		-1	0.000321543	2.53427e-05
												-0.5	0.000331135	-0.000347658		-0.5	-0.000338047	-8.52825e-05
												0	0.00037839	-0.000296308		0	0.000286221	0.000223092
												0.5	-0.000627127	-0.000383959		0.5	-5.06836e-05	-0.000165533
												1	-0.000360014	-0.000332609		1	-0.000131702	0.000421842
												1.5	0.000389755	-0.000281259		1.5	0.000393165	-0.000246783
												2	0.000556867	-0.000369909		2	8.42614e-05	0.000201592
												2.5	0.000472493	-3.95591e-05		2.5	0.000641129	9.09665e-05
												3	-0.000509309	-0.000267209		3	6.54532e-05	0.000120341
												3.5	-0.000366254	0.000203141		3.5	5.95492e-05	0.000289716
												4	0.000503172	0.00011449		4	0.000500302	0.000179091
												4.5	0.000773942	0.00044584		4.5	0.00035077	0.000627466
												5	0.000781511	0.00049719		5	0.000951666	0.000237841
												5.5	-5.64912e-05	0.00082754		5.5	0.000419561	0.000826215
												6	0.000126592	0.00087889		6	0.000549657	0.00057559
												6.5	0.0012	0.00093024		6.5	0.00103	0.000744965
												7	0.00144	0.00112		7	0.000969449	0.00105
												7.5	0.00152	0.00117		7.5	0.00141	0.000803715
												8	0.000527526	0.0015		8	0.000802012	0.00125
												8.5	0.000778667	0.00141		8.5	0.000896251	0.00114
												9	0.00168	0.00174		9	0.00135	0.00103
												9.5	0.00197	0.00152		9.5	0.00128	0.00148
												10	0.00197	0.00199		10	0.00181	0.00123
												10.5	0.001	0.00176		10.5	0.00134	0.00168
												11	0.00125	0.00237		11	0.00137	0.00129
												11.5	0.00228	0.00214		11.5	0.0019	0.00188
												12	0.00257	0.00275		12	0.00179	0.00177
												12.5	0.00305	0.00238		12.5	0.00221	0.0018
												13	0.0022	0.00313		13	0.00149	0.0021
												13.5	0.00267	0.00291		13.5	0.00146	0.00171
												14	0.0033	0.00338		14	0.00225	0.0023
												14.5	0.00345	0.00343		14.5	0.00226	0.00191
												15	0.00365	0.00348		15	0.0028	0.00236
												15.5	0.00271	0.00395		15.5	0.00188	0.00239
												16	0.00318	0.00372		16	0.00205	0.00256
												16.5	0.0036	0.00419		16.5	0.00254	0.00287
												17	0.00394	0.00396		17	0.00263	0.00262
												17.5	0.00423	0.00457		17.5	0.00312	0.00307
												18	0.00359	0.00435		18	0.00232	0.00254
												18.5	0.00408	0.00481		18.5	0.00249	0.00271
												19	0.00457	0.00473		19	0.00336	0.00315
												19.5	0.00504	0.00506		19.5	0.00332	0.0029
												20	0.00521	0.00511		20	0.00374	0.00335
												20.5	0.00447	0.00516		20.5	0.00256	0.0031
												21	0.00502	0.00549		21	0.00286	0.00341
												21.5	0.00516	0.00554		21.5	0.00357	0.0033
												22	0.00546	0.00587		22	0.00375	0.00333
												22.5	0.00587	0.00578		22.5	0.00405	0.00364
												23	0.00567	0.00625		23	0.00292	0.00339
												23.5	0.00604	0.00603		23.5	0.00323	0.00398
												24	0.00612	0.00664		24	0.00384	0.00373
												24.5	0.0062	0.00655		24.5	0.00401	0.00404
												25	0.00683	0.0066		25	0.00437	0.00407
												25.5	0.00647	0.00693		25.5	0.00334	0.00423
												26	0.00674	0.00684		26	0.00369	0.00426
												26.5	0.00652	0.00731		26.5	0.00441	0.00415
												27	0.00685	0.00708		27	0.00467	0.00446
												27.5	0.00758	0.00755		27.5	0.00495	0.00407
												28	0.00724	0.00733		28	0.00393	0.00424
												28.5	0.00766	0.00822		28.5	0.00434	0.00441
												29	0.00722	0.00841		29	0.00476	0.0043
												29.5	0.00745	0.0086		29.5	0.00494	0.00475
												30	0.0084	0.00809		30	0.00521	0.00478
												30.5	0.00833	0.0087		30.5	0.00439	0.00523
												31	0.00884	0.00861		31	0.00478	0.00484
												31.5	0.00804	0.00894		31.5	0.00532	0.00528
												32	0.00833	0.00913		32	0.00532	0.00518
												32.5	0.00926	0.00891		32.5	0.00563	0.00548
												33	0.00952	0.00938		33	0.00479	0.00537
												33.5	0.00981	0.00915		33.5	0.00526	0.00526
												34	0.00886	0.00962		34	0.00547	0.00543
												34.5	0.00927	0.00953		34.5	0.00545	0.00518
												35	0.01006	0.01		35	0.00591	0.00563
												35.5	0.0104	0.01005		35.5	0.0054	0.00524
												36	0.01054	0.0101		36	0.00602	0.00583
												36.5	0.00958	0.01029		36.5	0.00593	0.0053
												37	0.00977	0.01021		37	0.00578	0.00589
												37.5	0.01078	0.01068		37.5	0.00624	0.00592
												38	0.01114	0.01045		38	0.00564	0.00553
												38.5	0.0113	0.01092		38.5	0.00647	0.00598
												39	0.01039	0.01125		39	0.00612	0.00573
												39.5	0.01057	0.01172		39.5	0.00629	0.00617
												40	0.01142	0.01149		40	0.00674	0.00578
												40.5	0.01186	0.01182		40.5	0.00647	0.00623
												41	0.01203	0.01187		41	0.00696	0.00612
												41.5	0.01124	0.0122		41.5	0.00633	0.00615
												42	0.01147	0.01225		42	0.00637	0.00632
												42.5	0.01237	0.01245		42.5	0.00685	0.00607
												43	0.01266	0.01292		43	0.00683	0.00652
												43.5	0.0128	0.01269		43.5	0.00726	0.00627
												44	0.01202	0.0133		44	0.00669	0.00686
												44.5	0.01225	0.01307		44.5	0.00672	0.00647
												45	0.01313	0.01354		45	0.00732	0.00692
												45.5	0.01349	0.01359		45.5	0.00723	0.00653
												46	0.01366	0.01378		46	0.00758	0.00697
												46.5	0.01276	0.01397		46.5	0.00676	0.00686
												47	0.01283	0.01402		47	0.00685	0.00689
												47.5	0.01377	0.01408		47.5	0.0076	0.00734
												48	0.01415	0.01441		48	0.00755	0.00695
												48.5	0.01427	0.01474		48.5	0.00802	0.00726
												49	0.01338	0.01465		49	0.00716	0.00729
												49.5	0.01355	0.01498		49.5	0.00727	0.00704
												50	0.01444	0.01475		50	0.00802	0.00749
												50.5	0.01478	0.01522		50.5	0.00794	0.00738
												51	0.01517	0.01499		51	0.0084	0.00769
												51.5	0.01429	0.01546		51.5	0.00736	0.00758
												52	0.01454	0.01524		52	0.00765	0.00789
												52.5	0.01536	0.01585		52.5	0.00839	0.00764
												53	0.01564	0.01548		53	0.00841	0.00794
												53.5	0.01572	0.01609		53.5	0.00886	0.00783
												54	0.01466	0.016		54	0.00765	0.00772
												54.5	0.01495	0.01591		54.5	0.00815	0.00803
												55	0.01557	0.01638		55	0.0087	0.00778
												55.5	0.01584	0.01615		55.5	0.00879	0.00823
												56	0.01617	0.01662		56	0.009	0.00784
												56.5	0.01564	0.01654		56.5	0.00799	0.00815
												57	0.01598	0.01701		57	0.00837	0.00818
												57.5	0.01669	0.0165		57.5	0.00889	0.00821
												58	0.01689	0.01711		58	0.00902	0.0088
												58.5	0.01702	0.01688		58.5	0.00937	0.00855
												59	0.01593	0.01735		59	0.00847	0.00872
												59.5	0.01647	0.01712		59.5	0.00878	0.00874
												60	0.01698	0.01759		60	0.00948	0.00864
												60.5	0.01726	0.01765		60.5	0.00974	0.0088
												61	0.01762	0.0177		61	0.01	0.00855
												61.5	0.0169	0.01775		61.5	0.00881	0.00886
												62	0.0173	0.0178		62	0.00918	0.00861
												62.5	0.01742	0.01813		62.5	0.00962	0.00892
												63	0.01787	0.0179		63	0.00977	0.00881
												63.5	0.01814	0.01851		63.5	0.01002	0.00898
												64	0.01752	0.01828		64	0.00906	0.00887
												64.5	0.01789	0.01875		64.5	0.00942	0.00876
												65	0.01808	0.01867		65	0.00996	0.00921
												65.5	0.01831	0.019		65.5	0.01014	0.00882
												66	0.01858	0.01877		66	0.0103	0.00927
												66.5	0.01814	0.0191		66.5	0.00948	0.00902
												67	0.01863	0.01915		67	0.00985	0.00947
												67.5	0.01881	0.0192		67.5	0.01015	0.00963
												68	0.01912	0.01939		68	0.01018	0.00924
												68.5	0.01928	0.0193		68.5	0.01048	0.00969
												69	0.0187	0.01949		69	0.00982	0.0093
												69.5	0.01911	0.01927		69.5	0.01014	0.00975
												70	0.01924	0.01988		70	0.01058	0.00936
												70.5	0.01959	0.01965		70.5	0.01054	0.00995
												71	0.01982	0.01998		71	0.01071	0.00942
												71.5	0.01942	0.02003		71.5	0.0099	0.01001
												72	0.01978	0.02008		72	0.01038	0.00962
												72.5	0.01982	0.02027		72.5	0.01078	0.00979
												73	0.02003	0.02018		73	0.01064	0.0101
												73.5	0.02043	0.02066		73.5	0.01103	0.01041
												74	0.02026	0.02043		74	0.01026	0.01071
												74.5	0.02067	0.02104		74.5	0.01084	0.01046
												75	0.02048	0.02067		75	0.01118	0.01105
												75.5	0.02062	0.02114		75.5	0.0113	0.01066
												76	0.02085	0.02091		76	0.01143	0.01125
												76.5	0.02056	0.02138		76.5	0.01065	0.011
												77	0.02091	0.02129		77	0.01107	0.01117
												77.5	0.02088	0.02148		77.5	0.01139	0.01162
												78	0.02088	0.02154		78	0.01131	0.01109
												78.5	0.02135	0.02159		78.5	0.01168	0.01182
												79	0.02103	0.02192		79	0.01096	0.01143
												79.5	0.02136	0.02169		79.5	0.01153	0.01173
												80	0.02125	0.02202		80	0.0115	0.01163
												80.5	0.02146	0.02179		80.5	0.01145	0.01151
												81	0.02175	0.02212		81	0.01194	0.01182
												81.5	0.02132	0.0219		81.5	0.01125	0.01143
												82	0.02161	0.02223		82	0.01188	0.01202
												82.5	0.02133	0.022		82.5	0.01156	0.01149
												83	0.02149	0.02219		83	0.01159	0.01194
												83.5	0.02232	0.02252		83.5	0.01198	0.01127
												84	0.02221	0.02257		84	0.01154	0.01158
												84.5	0.02257	0.02276		84.5	0.01187	0.01147
												85	0.02224	0.02253		85	0.01181	0.0115
												85.5	0.02238	0.02286		85.5	0.01195	0.01153
												86	0.02262	0.02264		86	0.01227	0.01142
												86.5	0.02221	0.02311		86.5	0.01163	0.01201
												87	0.02266	0.02288		87	0.01235	0.01134
												87.5	0.02239	0.02335		87.5	0.01187	0.01179
												88	0.02243	0.02298		88	0.0119	0.01182
												88.5	0.02311	0.02345		88.5	0.01237	0.01171
												89	0.02307	0.02336		89	0.01215	0.01187
												89.5	0.02354	0.02369		89.5	0.01261	0.01162
												90	0.02368	0.02361		90	0.01268	0.01207
												90.5	0.02348	0.0238		90.5	0.01243	0.0114
