# Supplementary material for: Impact of energy limitations on function and resilience in long-wavelength Photosystem II
Source: eLife. 2022 Jul 19;11:e79890. doi: 10.7554/eLife.79890 (PMC9439682; doi:10.7554/eLife.79890)
Supplement: Appendix 6—figure 2—source data 1. [file elife-79890-app6-fig2-data1.xlsx]

## Sheet: Sheet1
A. marina	Untreated				Tri-washed
	Acceptors	DCMU	DCMU+His		Acceptors	DCMU	DCMU+His
-60	7.6022e-05	-2.62082e-05	-0.000565934		-0.000603203	-0.0014	-0.000334073
-59.5	-0.000435333	0.000145806	0.000159528		0.00029717	-0.00123	-4.32445e-05
-59	-4.37977e-06	3.53429e-06	2.05727e-05		-0.000373457	-0.00134	-0.000180416
-58.5	-0.000359141	1.84055e-05	-3.9811e-05		0.000241916	-0.00131	-3.15867e-05
-58	-0.000163902	3.32768e-05	0.00013552		-0.000286711	-0.00114	-0.000310758
-57.5	-0.000282949	0.000126719	-0.000160579		0.000185662	-0.000968911	-0.000162929
-57	-0.000323425	0.000141591	1.47523e-05		-0.000199965	-0.0005104	-0.0002991
-56.5	2.89569e-05	0.000156462	-0.000280796		-1.35916e-05	-0.00105	-0.000151271
-56	-0.000247233	1.47398e-05	-0.000106015		-0.000256219	-0.000594378	-0.000287442
-55.5	0.000105149	0.000107633	-0.000244421		-6.98455e-05	-0.00128	3.38677e-06
-55	-0.000171041	0.000122504	-0.000226233		-0.000169472	-0.000678357	-0.000275784
-54.5	-5.43737e-05	0.000137375	-0.000129474		-0.000126099	-0.00122	0.000158045
-54	-9.48495e-05	0.000230818	-0.000189858		6.02736e-05	-0.000762336	-0.000122126
-53.5	2.18181e-05	0.000167118	6.34951e-05		-0.000325353	-0.00102	2.67024e-05
-53	-0.000332943	0.000103967	-7.49104e-05		0.00014702	-0.000846314	-0.000110469
-52.5	-0.000216276	4.02671e-05	2.12991e-05		-9.56072e-05	-0.000816803	-0.000334073
-52	-0.000571429	-2.34331e-05	3.94868e-05		0.000233766	-0.000787293	-4.32445e-05
-51.5	-0.000296677	-0.000244276	-0.00017749		-0.000151861	-0.000471782	-0.000180416
-51	-0.000337153	-7.22621e-05	0.000154434		0.000177512	-0.000299271	-3.15867e-05
-50.5	-6.38923e-05	-0.000293105	-0.000298258		-0.000351115	-0.00026976	-0.000310758
-50	5.27752e-05	-0.000121091	3.42158e-05		0.000121258	0.00018875	-0.000162929
-49.5	-6.6272e-05	-0.000263363	-0.000183311		-0.000264369	-0.000210739	-0.0002991
-49	-0.000106198	-9.13484e-05	-0.000165123		-7.79959e-05	0.000390772	-0.000151271
-48.5	-0.000225245	-0.00023362	8.87791e-05		-3.46229e-05	-0.000437717	-0.000287442
-48	-0.00026572	-0.000140177	2.83953e-05		-0.00027725	2.07932e-05	3.38677e-06
-47.5	-0.000463338	-0.00036102	0.000203176		5.21232e-05	-0.000235696	-0.000275784
-47	-0.000346671	-0.000189006	0.000221364		-0.000475504	-6.31853e-05	0.000158045
-46.5	-0.000620879	-0.000252707	8.29588e-05		-4.13066e-06	0.000109325	-0.000122126
-46	-0.000427623	-0.000159264	0.00025774		-0.000388758	-0.000147164	2.67024e-05
-45.5	-0.000626374	-0.000301535	4.07626e-05		-6.03846e-05	0.000168347	-0.000110469
-45	-0.000115716	-0.000208093	0.000216093		-0.000445012	0.000197858	-0.000162929
-44.5	-0.000391906	-0.000350364	-8.00049e-05		2.63615e-05	0.000370368	-0.0002991
-44	-3.95245e-05	-0.00017835	9.53258e-05		-0.000215265	0.000256879	-0.000151271
-43.5	-0.000237143	-0.000320622	-0.000200772		-0.000171892	0.00028639	-0.000287442
-43	3.66674e-05	-0.000227179	-0.000104013		-0.000128519	0.000315901	3.38677e-06
-42.5	-0.000318094	-0.000290879	-0.00032154		-0.000514146	5.94113e-05	-0.000275784
-42	-0.000201426	-0.000276008	-0.000146209		-4.17732e-05	0.000231922	0.000158045
-41.5	-0.000554945	-2.54226e-05	-0.000285164		-0.0005704	-0.000167567	-0.000122126
-41	-0.000517542	-0.000167694	-0.000109834		-0.000241027	0.000433944	2.67024e-05
-40.5	-0.000400875	8.28912e-05	-0.000170217		-0.000483654	-0.000108546	-0.000110469
-40	-0.000362779	-0.000137952	0.000162257		-0.000440281	0.000206965	-0.00010464
-39.5	-8.95187e-05	0.000191205	0.000101873		-0.000396908	-0.000335524	-9.88108e-05
-39	-0.000208016	-0.000108209	-3.70824e-05		-0.000639535	-2.00136e-05	-9.29819e-05
-38.5	6.52451e-05	0.000220948	-9.74659e-05		-0.000167162	-0.000561503	-0.000229153
-38	-0.000210396	-7.84665e-05	-0.00015785		-0.000552789	0.000182008	6.16759e-05
-37.5	-1.57062e-05	0.000172119	-0.000218234		-8.04158e-05	-7.44814e-05	-0.000503495
-37	-0.000686813	-4.87242e-05	-0.000357188		-0.000466043	0.000241029	-0.000354666
-36.5	-0.000253251	4.47185e-05	-0.00026043		-0.00013667	0.00012754	-0.000491837
-36	-0.000529441	-9.75533e-05	-0.000320813		-0.000379297	0.000586051	-0.000343008
-35.5	-0.000334202	-4.11045e-06	-0.000145482		-0.000192924	0.000186562	-0.00048018
-35	-0.000686813	1.07608e-05	-0.000284437		-0.000292551	0.000645072	-0.000474351
-34.5	-0.000336581	2.5632e-05	-3.05356e-05		-0.000392178	0.000388583	-0.000468522
-34	-0.000455628	-3.80681e-05	-0.000169491		-0.000348804	0.000561094	-0.000319693
-33.5	-0.000103247	-2.31969e-05	8.44115e-05		-0.000305431	0.000161605	-0.000456864
-33	-0.000300865	7.02456e-05	-5.45438e-05		0.000166942	0.000334115	-0.000451035
-32.5	5.15166e-05	-7.20258e-05	0.000120787		-0.000361685	-0.000207374	-0.000588206
-32	-0.000146102	-5.71544e-05	-9.67396e-05		-0.000175312	-3.58633e-05	-0.000296377
-31.5	-0.000422292	-0.00035602	0.000157162		0.000583061	-0.000434353	-0.000576548
-31	-0.000148481	-0.000105434	-0.000295529		5.44338e-05	-0.000118842	-0.000427719
-30.5	-0.000582418	-0.000326277	-4.21765e-05		0.000526807	-0.000375331	-0.00070789
-30	-7.22896e-05	-7.56918e-05	-0.000337725		0.00014118	-5.98204e-05	-0.000416062
-29.5	-0.000505073	-0.000296535	-0.000162395		0.000613553	-0.00017331	-0.000553233
-29	3.90227e-06	-0.000203092	-0.000301349		8.4926e-05	0.000284201	-0.000261404
-28.5	-0.000271738	-0.000423935	-4.7997e-05		0.000271299	0.000599712	-0.000541575
-28	-7.70489e-05	-1.62065e-05	-0.000186403		0.000600672	0.000200223	-0.000249746
-27.5	-0.000195546	-0.000315621	6.695e-05		0.000215045	0.000515733	-0.000672917
-27	-0.000393165	-0.000143607	6.56626e-06		0.000258418	0.000117244	0.000189912
-26.5	-0.000276497	-0.000207307	0.000103325		0.000158791	0.000146755	-0.000518259
-26	-0.000554945	-0.000113864	-0.000113652		5.91643e-05	-0.000109734	0.00020157
-25.5	-0.00043602	-9.89934e-05	-9.54637e-05		0.000245537	-0.000223224	-0.000363601
-25	-0.000476495	-5.55049e-06	-0.000155848		-0.00013909	-0.000336713	-7.17724e-05
-24.5	-0.000593407	-6.92505e-05	-0.000294803		0.000475283	-0.000164202	-0.000494943
-24	-0.000400303	-0.000132951	-0.000119472		-0.000338343	-0.000277692	8.18854e-05
-23.5	-0.000362208	-3.95082e-05	-0.00041557		0.00027603	-0.000105181	-0.000340286
-23	-0.000166969	0.000132506	-8.30967e-05		3.44026e-05	6.73299e-05	0.000236543
-22.5	-0.000128873	-9.76566e-06	-0.000457766		0.000648776	9.68406e-05	-0.000185628
-22	-0.000483634	0.000162248	0.000110421		0.000121149	0.000126351	0.000105201
-21.5	-5.2681e-05	9.85484e-05	-0.000185676		2.15217e-05	0.000298862	-3.097e-05
-21	-0.000486014	0.000191991	6.82258e-05		-7.81052e-05	-0.000100627	0.000116859
-20.5	-0.000290775	0.000128291	7.84209e-06		-0.000177732	0.000500884	0.000122688
-20	-0.000252679	0.000221734	-5.25416e-05		-0.000277359	-0.000327606	-1.34833e-05
-19.5	-0.000293154	7.94615e-05	-0.000270068		-9.09861e-05	0.000273905	0.000134346
-19	5.92269e-05	0.000251476	-0.000330452		-0.000333613	-0.000554584	0.000140175
-18.5	-0.000138391	0.000109204	-0.000469407		-4.23996e-06	-0.000239073	0.000146003
-18	5.68473e-05	0.000202647	-0.000215505		-0.000675867	0.000219437	0.000151832
-17.5	-6.21995e-05	0.000138947	-0.000511603		8.25061e-05	-0.000180052	-0.000270339
-17	-2.41036e-05	0.00023239	-2.19866e-05		-0.000446121	0.000421459	-0.00012151
-16.5	1.39923e-05	1.15464e-05	-0.000318085		0.000455252	0.000164969	-0.000401681
-16	-2.64832e-05	0.000104989	-6.41824e-05		-0.000502375	0.00033748	-0.000109852
-15.5	1.16127e-05	4.1289e-05	-0.000203138		0.000541998	0.000366991	-0.000533023
-15	-0.000185456	5.61604e-05	-0.00018495		-0.000129629	0.000110502	-0.000241194
-14.5	-0.00014736	-7.54e-06	-0.000166762		0.000342744	0.000140012	-0.000521365
-14	-0.000344979	7.33126e-06	-0.000305717		-4.28825e-05	-0.000259477	-0.000229536
-13.5	-0.000306883	2.22025e-05	-0.000208958		0.000143491	-8.69662e-05	-0.000509707
-13	-0.000347358	-0.000355784	-0.000269342		4.38636e-05	-0.000343455	-7.48785e-05
-12.5	-0.000309263	-0.000105198	-0.000486319		8.72366e-05	-0.000313945	-0.00064105
-12	0.000199713	-0.000247469	-0.000232966		-1.23903e-05	-0.000141434	-0.000206221
-11.5	-7.59275e-05	3.11607e-06	-0.000528515		-0.000540017	-0.000539923	-0.000629392
-11	0.000197882	-0.000139155	3.91235e-05		-0.000211644	6.05875e-05	-0.000337563
-10.5	-0.000156879	3.28586e-05	-0.000413568		-0.000453271	-0.000480902	-0.000760734
-10	-0.000118783	-0.000109413	7.54989e-05		-0.000124898	0.000405609	-0.000325905
-9.5	-0.000316401	0.000141173	-0.000142027		-0.000366525	-0.00027988	-0.000606076
-9	-0.000278305	-7.96703e-05	3.3303e-05		-0.000323152	0.00032163	-0.000457247
-8.5	-0.000397352	0.000249486	-0.000262246		-0.000279779	-7.78588e-05	-0.000594418
-8	-0.000359257	-4.9928e-05	-0.000166036		-0.000522406	-0.000333348	0.000126411
-7.5	-0.000399182	0.000279229	-0.000461584		-0.000336033	-0.000303837	-0.00029676
-7	-0.000204493	5.83857e-05	-0.000286254		-0.00057866	1.06734e-05	0.000280068
-6.5	-0.000166397	0.000308971	-0.000346637		-0.000249287	-0.000673816	-0.000142103
-6	-4.97298e-05	8.81286e-05	-0.000171307		-0.000634914	-0.000215305	0.000291726
-5.5	-1.1634e-05	0.000260142	-0.000231691		-0.000162541	-0.000614794	-0.000130445
-5	0.000105034	0.000196442	2.16621e-05		-0.000691168	-0.000299284	0.000303384
-4.5	6.45577e-05	0.000289885	-3.87216e-05		-0.000218795	-0.000555773	2.4213e-05
-4	0.000102654	0.000226185	0.00021518		-0.000747422	-9.72622e-05	0.000173042
-3.5	-1.63931e-05	0.000241056	-2.34612e-06		-0.000132049	-0.000353751	-0.000250129
-3	-0.000134891	-5.83582e-05	0.000172985		-0.000660675	-3.82408e-05	4.16998e-05
-2.5	-0.000253937	-0.000121509	-0.000122564		-0.000331302	-0.00015173	-9.54713e-05
-2	-0.000294413	0.000128527	-0.000104376		-1.92937e-06	2.07807e-05	0.000196358
-1.5	-9.91742e-05	-9.17665e-05	-0.000321903		-0.000387556	5.02914e-05	-0.000226813
-1	-6.10786e-05	7.96978e-05	-0.000146572		0.000227817	7.98022e-05	0.000350015
-0.5	5.5589e-05	-0.000219167	-4.98131e-05		-0.00015781	-3.36871e-05	-0.000358156
0	1.51134e-05	-0.000125724	4.69461e-05		0.000314563	-0.000147176	0.000361673
0.5	0.000288374	-0.000267996	6.51341e-05		-0.000214064	-0.000260666	-0.000489498
1	1.27338e-05	-9.59819e-05	0.000161343		0.000401309	-0.000803155	0.000231331
1.5	-2.77418e-05	-0.000238253	0.000179531		1.5682e-05	-0.000344644	-0.00033484
2	-0.00022536	1.23321e-05	0.000119697		0.000345055	-0.000458133	-4.30111e-05
2.5	-0.000108693	-0.00012994	5.93132e-05		-4.05719e-05	3.77303e-07	-0.000180182
3	-0.00022774	4.20746e-05	-7.96418e-05		0.000288801	2.9888e-05	-3.13533e-05
3.5	4.60704e-05	-0.000100197	-0.000218597		0.000903174	0.000345399	-2.55244e-05
4	5.59495e-06	0.000149839	-0.000200409		8.95472e-05	0.00023191	-0.000162695
4.5	0.000357976	-7.04544e-05	5.34929e-05		0.00027592	0.00054642	-1.38665e-05
5	0.000396073	0.000101559	-0.000164034		3.32933e-05	0.000290931	-0.000151038
5.5	0.000355597	-4.0712e-05	-0.000145846		0.000505666	0.000463442	-0.000145209
6	0.000631868	0.000131302	-4.90867e-05		0.000120039	-7.90476e-05	-0.00013938
6.5	0.000274646	0.000459909	-3.0899e-05		0.000592412	9.34632e-05	9.44912e-06
7	0.000703297	0.000161045	-1.27112e-05		6.37855e-05	-0.000306026	1.5278e-05
7.5	0.000350838	0.000332509	5.47652e-06		0.000536159	-0.000276515	0.000164107
8	0.000703297	0.000112215	-5.49071e-05		0.000579532	-0.000390005	2.69359e-05
8.5	0.000978022	0.000440823	-0.000193862		0.000622905	-7.44939e-05	3.27648e-05
9	0.00102	6.33868e-05	-0.000332818		0.000523278	-0.000187983	3.85937e-05
9.5	0.00121	0.000391994	-0.000393201		-5.34927e-06	0.000270528	4.44226e-05
10	0.00141	1.45577e-05	-0.00060989		0.000467024	-0.000128962	0.000193252
10.5	0.00121	0.000343165	-0.000121112		8.13968e-05	0.000615549	5.60804e-05
11	0.00156	4.43003e-05	-0.000495231		0.00055377	7.30598e-05	0.000204909
11.5	0.00113	0.000372908	-0.000241879		0.000168143	-4.04295e-05	-0.000218262
12	0.00148	-8.31e-05	-0.000537427		0.000783516	-0.000153919	7.35672e-05
12.5	0.00136	0.000246057	-0.000440668		0.000111889	-0.000267408	-0.000206604
13	0.00148	-0.000131929	-0.000659341		0.00101	-0.000380897	-5.7775e-05
13.5	0.00167	0.000118657	-0.00071978		0.000198635	-6.53866e-05	-0.000337946
14	0.00163	-2.36151e-05	-0.000934066		0.000957008	-0.000178876	-0.000189117
14.5	0.00214	-8.74385e-06	-0.000994505		0.000143381	-0.000149365	-0.000469288
15	0.00202	6.12742e-06	-0.00114		0.000900754	0.000166146	-0.000320459
15.5	0.00245	-5.75725e-05	-0.000879121		8.71273e-05	5.26564e-05	-0.00074363
16	0.00241	-0.000121273	-0.00126		0.0009875	0.000368167	-0.000451802
16.5	0.00237	-0.000420687	-0.000846154		0.000173873	-0.000174322	-0.000874973
17	0.00209	-0.000248673	-0.0013		0.000931246	0.000427189	-0.000583144
17.5	0.00237	-0.000468967	-0.000807692		0.00026062	-0.000543301	-0.00101
18	0.00217	-0.000297502	-0.0011		0.000160993	5.721e-05	-0.000571486
18.5	0.0026	-0.000439224	-0.00109		0.000347366	-0.000770279	-0.000851657
19	0.00248	-0.000346331	-0.00115		0.000104739	-0.000454769	-0.000702828
19.5	0.00299	-0.000409482	-0.00152		0.000291112	-0.000711258	-0.000982999
20	0.00287	-0.000473182	-0.00166		4.84847e-05	-0.000395747	-0.00083417
20.5	0.0033	-0.00037974	-0.00157		0.000663858	-0.000509236	-0.000685341
21	0.0031	-0.000598901	-0.00178		-7.76916e-06	9.12744e-05	-0.000822512
21.5	0.00346	-0.000428568	-0.00153		0.000750604	-2.22148e-05	-0.000673684
22	0.00318	-0.000648352	-0.00174		-6.40231e-05	0.000579296	-0.000238855
22.5	0.0033	-0.000320254	-0.00149		0.00069435	-0.000248193	-0.000519026
23	0.00318	-0.000620879	-0.00171		-0.000120277	0.000352317	-0.000227197
23.5	0.00337	-0.000369084	-0.00169		0.000781096	-0.000618172	-0.000650368
24	0.00334	-0.000511355	-0.00175		-3.35309e-05	-0.000302661	-0.000644539
24.5	0.00361	-0.000339341	-0.00197		0.000295842	-0.00055915	-0.00063871
25	0.00373	-0.000481613	-0.00203		-0.000232785	-0.00024364	-0.000918881
25.5	0.00384	-0.00038817	-0.00209		0.000382588	-0.000500129	-0.000770052
26	0.00412	-0.000216155	-0.00238		-3.03868e-06	-0.000470618	-0.00119
26.5	0.00415	-0.000593407	-0.00213		0.000469334	-0.000441108	-0.00104
27	0.00403	-0.000264985	-0.00251		0.000798707	-0.000697597	-0.00132
27.5	0.00376	-0.000565934	-0.00225		0.00084208	-9.6086e-05	-0.00103
28	0.00419	-0.000392385	-0.00247		0.00103	-0.000495575	-0.0016
28.5	0.00407	-0.000692308	-0.00221		0.000785827	-0.000609065	-0.00131
29	0.00458	-0.000519785	-0.00227		0.00112	-0.000150554	-0.00187
29.5	0.00454	-0.000659341	-0.00234		0.000729573	-0.000407043	-0.00144
30	0.00497	-0.000725275	-0.00247		0.0012	-9.15324e-05	-0.00186
30.5	0.00462	-0.000708791	-0.00262		0.000673319	-0.000348022	-0.00157
31	0.00489	-0.000774725	-0.00283		0.00129	-0.000747511	-0.00199
31.5	0.00462	-0.000758242	-0.00289		0.000474065	-0.000575	-0.00127
32	0.00481	-0.000901099	-0.00287		0.00123	-0.000831489	-0.00127
32.5	0.00477	-0.000807692	-0.00309		0.000560811	-0.000801979	-0.00126
33	0.00496	-0.00103	-0.00291		0.00118	-0.00106	-0.00125
33.5	0.00508	-0.000934066	-0.00305		0.000790557	-0.000885957	-0.00125
34	0.00543	-0.00115	-0.0028		0.00126	-0.000856447	-0.00138
34.5	0.00547	-0.000906593	-0.00302		0.000734303	-0.000683936	-0.00138
35	0.00566	-0.0012	-0.00284		0.00106	-0.000797425	-0.0018
35.5	0.00554	-0.00111	-0.00314		0.000821049	-0.000767914	-0.00151
36	0.00527	-0.00102	-0.00304		0.00101	-0.000595404	-0.00193
36.5	0.00554	-0.000923077	-0.00342		0.000764795	-0.000708893	-0.0015
37	0.00551	-0.00107	-0.0034		0.000237168	-0.000536382	-0.00192
37.5	0.00593	-0.000972527	-0.00369		0.000566541	-0.000649871	-0.00163
38	0.00597	-0.00104	-0.00352		3.79145e-05	-0.000762361	-0.00234
38.5	0.00632	-0.00102	-0.00374		0.000510288	-0.00073285	-0.0019
39	0.00613	-0.00101	-0.0034		-1.83394e-05	-0.000989339	-0.00247
39.5	0.00632	-0.000912088	-0.00354		0.000740034	-0.0011	-0.00218
40	0.00604	-0.000901099	-0.00352		6.84067e-05	-0.0015	-0.0026
40.5	0.00624	-0.00104	-0.00374		0.00054078	-0.00119	-0.00231
41	0.0062	-0.000868132	-0.00412		0.000155153	-0.00144	-0.00188
41.5	0.00624	-0.00109	-0.00402		0.000627526	-0.000698786	-0.0023
42	0.00667	-0.00108	-0.00408		0.000241899	-0.0011	-0.00215
42.5	0.00663	-0.00122	-0.00422		0.000428272	-0.000639764	-0.002
43	0.00682	-0.00113	-0.00428		4.2645e-05	-0.00104	-0.00228
43.5	0.00702	-0.00127	-0.00426		0.000515018	-0.000437743	-0.00213
44	0.00674	-0.00118	-0.00424		0.000129391	-0.00141	-0.00255
44.5	0.00702	-0.0014	-0.00423		0.000458764	-0.000664721	-0.00212
45	0.00674	-0.0013	-0.0042		0.000216137	-0.00121	-0.00269
45.5	0.00693	-0.0016	-0.00411		0.00011651	-0.0008917	-0.00225
46	0.00705	-0.00166	-0.00425		0.000445883	-0.00143	-0.00296
46.5	0.00725	-0.00165	-0.00431		6.02563e-05	-0.00126	-0.00253
47	0.00745	-0.00171	-0.00476		0.000961629	-0.00166	-0.00338
47.5	0.0074	-0.00162	-0.00466		4.00239e-06	-0.00149	-0.0028
48	0.00729	-0.00176	-0.00496		0.000905375	-0.00174	-0.00322
48.5	0.0074	-0.00166	-0.00486		-5.12515e-05	-0.00143	-0.00322
49	0.00736	-0.00181	-0.00469		0.000992122	-0.00169	-0.0035
49.5	0.00724	-0.00164	-0.00483		3.54946e-05	-0.00137	-0.00349
50	0.00759	-0.00186	-0.00473		0.000792868	-0.00106	-0.00363
50.5	0.0074	-0.00169	-0.00471		0.000122241	-0.00103	-0.00305
51	0.00798	-0.00191	-0.00493		0.000736614	-0.00143	-0.00347
51.5	0.00779	-0.00174	-0.00484		-7.70132e-05	-0.00111	-0.00304
52	0.00798	-0.0018	-0.00513		0.00068036	-0.00151	-0.00346
52.5	0.0081	-0.00179	-0.00511		9.73288e-06	-0.00134	-0.00317
53	0.00782	-0.00169	-0.00533		0.000624106	-0.00174	-0.00345
53.5	0.00818	-0.00184	-0.00547		9.6479e-05	-0.00156	-0.00302
54	0.0079	-0.00174	-0.00529		0.000567852	-0.00168	-0.00372
54.5	0.00817	-0.00196	-0.00559		0.000183225	-0.00179	-0.00329
55	0.00829	-0.00179	-0.00525		0.000512598	-0.00147	-0.00386
55.5	0.00817	-0.00177	-0.00555		-0.000159029	-0.00173	-0.00356
56	0.00829	-0.00152	-0.00537		0.000456344	-0.00141	-0.00427
56.5	0.00848	-0.00182	-0.00552		0.000642717	-0.00181	-0.00398
57	0.00891	-0.00157	-0.00573		0.00054309	-0.00136	-0.0044
57.5	0.00855	-0.00179	-0.00571		0.000729463	-0.00147	-0.00426
58	0.00868	-0.00162	-0.00585		0.000629836	-0.0013	-0.00425
58.5	0.00863	-0.00184	-0.00607		0.000673209	-0.00127	-0.0041
59	0.00852	-0.00167	-0.0059		0.000573583	-0.00152	-0.00438
59.5	0.00879	-0.00189	-0.00619		0.000616956	-0.00121	-0.00423
60	0.00867	-0.00172	-0.00578		0.000517329	-0.00204	-0.00408
60.5	0.00918	-0.00194	-0.00608		0.000703702	-0.00215	-0.00379
61	0.00906	-0.00185	-0.00606		0.000318075	-0.00198	-0.00407
61.5	0.00941	-0.00191	-0.00627		0.000504448	-0.00238	-0.00392
62	0.00937	-0.00197	-0.00602		0.000261821	-0.00163	-0.0042
62.5	0.00941	-0.00204	-0.0064		0.000591194	-0.00246	-0.00434
63	0.00937	-0.0021	-0.0063		0.000205567	-0.00157	-0.00462
63.5	0.00925	-0.00201	-0.00668		0.00067794	-0.0024	-0.00461
64	0.00937	-0.00223	-0.0065		0.000149313	-0.00137	-0.00504
64.5	0.00925	-0.00205	-0.0068		0.000621686	-0.00206	-0.00489
65	0.00952	-0.00236	-0.00654		0.000236059	-0.00174	-0.00503
65.5	0.00956	-0.00226	-0.00668		0.000708432	-0.00214	-0.00488
66	0.00991	-0.00256	-0.00658		0.000751805	-0.00154	-0.00516
66.5	0.01011	-0.00231	-0.00672		0.000795178	-0.00194	-0.00487
67	0.00983	-0.00253	-0.00654		0.000981551	-0.00162	-0.00486
67.5	0.01003	-0.00236	-0.00684		0.000738924	-0.00145	-0.00471
68	0.00975	-0.00258	-0.00706		0.000782297	-0.00171	-0.00485
68.5	0.00987	-0.00241	-0.00704		0.00068267	-0.00211	-0.00456
69	0.00982	-0.00247	-0.00726		0.000726043	-0.00208	-0.00498
69.5	0.00986	-0.00238	-0.00716		0.000626417	-0.00262	-0.00483
70	0.01014	-0.00213	-0.00738		0.00095579	-0.00216	-0.00497
70.5	0.01018	-0.00243	-0.00713		0.000427163	-0.00242	-0.00539
71	0.01061	-0.00249	-0.00726		0.000756536	-0.00224	-0.00567
71.5	0.01033	-0.00247	-0.00701		0.000371909	-0.00236	-0.00552
72	0.01068	-0.00207	-0.00723		0.000843282	-0.0019	-0.0058
72.5	0.01025	-0.00245	-0.00721		0.000315655	-0.00201	-0.00522
73	0.0106	-0.00212	-0.00727		0.000930028	-0.00184	-0.00593
73.5	0.01025	-0.00234	-0.00741		0.000402401	-0.0021	-0.00535
74	0.01045	-0.00224	-0.00755		0.000873774	-0.00178	-0.00606
74.5	0.0104	-0.00238	-0.00769		0.000346147	-0.00218	-0.00534
75	0.01052	-0.00229	-0.00775		0.00081752	-0.00215	-0.00605
75.5	0.01087	-0.00259	-0.00797		0.000289893	-0.00269	-0.00533
76	0.01091	-0.00274	-0.00795		0.000333266	-0.00224	-0.0059
76.5	0.01063	-0.00264	-0.00808		9.06392e-05	-0.00292	-0.00546
77	0.01075	-0.00278	-0.00791		0.000563012	-0.00246	-0.00574
77.5	0.01071	-0.00269	-0.00774		0.000749385	-0.00301	-0.00574
78	0.01067	-0.00299	-0.00795		0.000363758	-0.00255	-0.00587
78.5	0.01102	-0.00274	-0.00793		0.000693131	-0.0028	-0.00587
79	0.01098	-0.00304	-0.00807		0.000307504	-0.00234	-0.00586
79.5	0.01134	-0.00287	-0.00813		0.000779877	-0.00303	-0.00629
80	0.01145	-0.00301	-0.00835		0.000394251	-0.00229	-0.00671
80.5	0.01133	-0.00291	-0.00834		0.000723624	-0.00268	-0.00642
81	0.01176	-0.00314	-0.00855		0.000480997	-0.00251	-0.00684
81.5	0.01117	-0.00304	-0.00845		0.00081037	-0.00248	-0.00626
82	0.01168	-0.0031	-0.00867		0.000710743	-0.00302	-0.00697
82.5	0.01132	-0.00309	-0.00842		3.91158e-05	-0.00271	-0.00625
83	0.01152	-0.00308	-0.00855		0.000654489	-0.00282	-0.0071
83.5	0.01156	-0.00314	-0.00814		0.000125862	-0.00279	-0.00667
84	0.0116	-0.00297	-0.00852		0.000884235	-0.00291	-0.00709
84.5	0.01195	-0.00311	-0.00842		0.000212608	-0.00288	-0.00623
85	0.01183	-0.00286	-0.00864		0.000970981	-0.00299	-0.00679
85.5	0.01179	-0.00276	-0.0087		0.000156354	-0.00253	-0.00636
86	0.01175	-0.00298	-0.00876		0.000628727	-0.00279	-0.00678
86.5	0.01171	-0.00281	-0.0089		0.0002431	-0.00204	-0.00635
87	0.01175	-0.00303	-0.00896		0.000572473	-0.00259	-0.00691
87.5	0.01179	-0.00286	-0.00886		0.000329846	-0.00227	-0.00662
88	0.01175	-0.00301	-0.00916		0.000373219	-0.00267	-0.00704
88.5	0.0121	-0.00284	-0.00875		0.000416592	-0.0025	-0.00704
89	0.01198	-0.00298	-0.00904		0.000317965	-0.00304	-0.00732
89.5	0.01233	-0.0028	-0.00903		0.000361338	-0.0033	-0.00745
90	0.01237	-0.00302	-0.00893		0.000261711	-0.00312	-0.00788
90.5	0.01241	-0.00285	-0.0093		0.000162085	-0.00309	-0.00759
91	0.01245	-0.00315	-0.00897		0.000348458	-0.00307	-0.00772
91.5	0.01272	-0.00298	-0.00958		0.000105831	-0.00289	-0.00743
92	0.0126	-0.00328	-0.00925		0.000292204	-0.00301	-0.00757
92.5	0.01256	-0.00303	-0.00962		4.95767e-05	-0.00269	-0.00742
93	0.01252	-0.00333	-0.00945		0.00052195	-0.00266	-0.00756
93.5	0.01248	-0.00308	-0.00951		0.000136323	-0.00292	-0.00727
94	0.01259	-0.00353	-0.00965		0.000608696	-0.00232	-0.00755
94.5	0.01248	-0.0032	-0.0094		0.000223069	-0.003	-0.00725
95	0.01283	-0.00342	-0.00977		0.000695442	-0.0024	-0.00796
95.5	0.01302	-0.00333	-0.00936		0.000309815	-0.00337	-0.00767
96	0.01314	-0.00332	-0.00973		0.000353188	-0.00263	-0.00824
96.5	0.01318	-0.00338	-0.00955		0.000110561	-0.00346	-0.00809
97	0.0129	-0.00321	-0.00985		1.09342e-05	-0.00285	-0.00908
97.5	0.01294	-0.00335	-0.01015		0.000197307	-0.0034	-0.00822
98	0.01274	-0.00318	-0.0099		0.00038368	-0.00308	-0.00864
98.5	0.01294	-0.00332	-0.01011		0.000284053	-0.00319	-0.00849
99	0.0129	-0.00307	-0.01009		0.000327426	-0.00317	-0.00892
99.5	0.01317	-0.00329	-0.01031		0.000370799	-0.00242	-0.00791
100	0.01321	-0.00312	-0.01021		0.000271172	-0.00296	-0.00833
100.5	0.01348	-0.00349	-0.01035		0.000457545	-0.00279	-0.00804
101	0.01345	-0.00317	-0.01002		0.000214919	-0.00305	-0.00861
101.5	0.01371	-0.00347	-0.01024		0.000544292	-0.00273	-0.00803
102	0.01344	-0.00314	-0.00998		0.000158665	-0.00299	-0.00874
102.5	0.01355	-0.00344	-0.01028		0.000488038	-0.00267	-0.0083
103	0.01328	-0.00319	-0.0101		0.000245411	-0.00307	-0.00887
103.5	0.0134	-0.00349	-0.01032		0.000431784	-0.00304	-0.00872
104	0.0132	-0.0034	-0.01023		0.000189157	-0.00344	-0.00929
104.5	0.01347	-0.00353	-0.01045		0.00037553	-0.00327	-0.009
105	0.01351	-0.00368	-0.01051		0.000133903	-0.00352	-0.00942
105.5	0.01386	-0.00374	-0.01072		-0.000108724	-0.0035	-0.00927
106	0.01398	-0.0038	-0.0107		0.000362649	-0.00375	-0.00926
106.5	0.01386	-0.00355	-0.01092		-2.19779e-05	-0.00358	-0.0094
107	0.0139	-0.00385	-0.0109		0.000307395	-0.00369	-0.00925
107.5	0.01363	-0.00392	-0.01065		0.000207768	-0.00352	-0.00925
108	0.01382	-0.00382	-0.01079		0.000536141	-0.00349	-0.00924
108.5	0.0137	-0.00342	-0.01053		0.000151514	-0.00289	-0.00909
109	0.01413	-0.0038	-0.01075		0.000337887	-0.00315	-0.00937
109.5	0.01393	-0.00338	-0.01058		0.00038126	-0.00312	-0.00908
110	0.01436	-0.00376	-0.01079		0.000424633	-0.00352	-0.00964
110.5	0.01425	-0.00336	-0.01077		0.000182006	-0.00334	-0.00935
111	0.01452	-0.00365	-0.01107		0.00022538	-0.00374	-0.01006
111.5	0.01432	-0.00333	-0.01113		0.000411753	-0.00343	-0.00963
112	0.01452	-0.0037	-0.01119		0.000169126	-0.00397	-0.01019
112.5	0.0144	-0.00346	-0.01125		0.000498499	-0.00365	-0.0099
113	0.01412	-0.0036	-0.01139		-3.01283e-05	-0.0042	-0.01047
113.5	0.01416	-0.00351	-0.01137		0.000585245	-0.0036	-0.01018
114	0.01435	-0.00373	-0.01135		0.000342618	-0.00399	-0.01017
114.5	0.01431	-0.00395	-0.01134		0.000814991	-0.00339	-0.01016
115	0.01466	-0.00377	-0.01124		0.000429364	-0.00365	-0.01002
115.5	0.01494	-0.00407	-0.01138		0.000615737	-0.00319	-0.01001
116	0.01459	-0.00382	-0.01113		0.00065911	-0.00373	-0.00986
116.5	0.01494	-0.0042	-0.01142		0.000559483	-0.00299	-0.01028
117	0.01451	-0.00395	-0.01125		0.000888856	-0.00367	-0.00999
117.5	0.01478	-0.00417	-0.01162		0.000360229	-0.00307	-0.01013
118	0.01466	-0.004	-0.0116		0.000832602	-0.00376	-0.01012
118.5	0.0147	-0.00414	-0.01182		0.000303975	-0.00401	-0.01012
119	0.01497	-0.00397	-0.01172		0.00106	-0.00398	-0.01026
119.5	0.01485	-0.00411	-0.01194		0.000247721	-0.0041	-0.01054
120	0.0152	-0.00402	-0.0116		0.000863094	-0.00393	-0.01053
