# Supplementary material for: Impact of energy limitations on function and resilience in long-wavelength Photosystem II
Source: eLife. 2022 Jul 19;11:e79890. doi: 10.7554/eLife.79890 (PMC9439682; doi:10.7554/eLife.79890)
Supplement: Appendix 6—figure 3—source data 1. [file elife-79890-app6-fig3-data1.xlsx]

## Sheet: Sheet1
A. marina
Replicate 6				PSI activity test (Fig S12)
	Acceptors	DCMU	DCMU+His	DCMU+MV	DCMU+MV+PSI donors
0	-0.000904473	-0.000946904	-0.000232836	-0.000526064	0.000214272
0.5	-0.000574902	-0.00018786	8.1663e-05	9.03771e-05	-0.000282165
1	-0.00053733	-0.000888817	-0.000334838	-0.000607181	9.73976e-05
1.5	-0.000791759	0.000455227	0.000126661	9.26015e-06	-0.000107039
2	-0.000608187	-0.000684729	-0.000289841	4.17017e-05	-0.000457477
2.5	-0.000716616	-7.16848e-05	0.000171658	-0.000655857	0.000360086
3	-0.000241044	-0.000480641	-0.000244843	0.000398585	-0.000720351
3.5	-0.000349473	-0.000451597	7.06558e-05	-0.000590974	0.000389212
4	-0.00104	-0.000276553	-0.000199845	0.000317468	-0.000545225
4.5	0.000163671	-0.000831509	-0.000177347	5.79093e-05	-0.000165662
5	-0.000674758	0.000512535	-0.000154848	-0.000493649	0.000213901
5.5	-0.000929186	-0.000919421	-0.000278349	0.000268792	-0.000720536
6	-1.56149e-05	0.000570623	3.71498e-05	-0.000720766	0.000535027
6.5	-0.001	-0.000423334	-0.000525351	0.000333675	-0.00069141
7	-0.000524472	-0.00010229	-0.000210853	-0.000217883	0.000126153
7.5	-0.0004869	-7.32457e-05	-0.000188354	-0.000477442	-0.000224284
8	-0.000595329	-0.000628202	-0.000457855	0.000285	-0.000574722
8.5	-0.000703757	0.000276842	-0.000143356	-0.000704558	0.000388841
9	-0.000374186	-0.000862114	-0.000412857	0.000641883	-0.000691596
9.5	-0.000628614	0.00048093	4.76415e-05	0.000236325	0.000125967
10	-0.000591043	-0.000804026	-0.00051386	-0.000315234	-0.00022447
10.5	-0.000115471	-4.49822e-05	-5.33609e-05	0.000447208	-0.000720907
11	-0.0009549	-0.000307938	-0.000322862	-0.000689351	-4.9344e-05
11.5	0.000105672	-0.000278894	-8.3633e-06	7.40907e-05	-0.000399781
12	-0.000294756	4.21495e-05	-0.000131864	-0.000331468	-0.000166218
12.5	-0.00113	-0.000658807	-0.000255366	-0.000445026	-7.86552e-05
13	7.23866e-05	0.000246237	-8.68669e-05	2.54152e-05	-0.000575092
13.5	-0.00121	-0.000746719	-0.000356368	-0.000673143	9.64706e-05
14	-0.00029047	0.000304325	-4.18693e-05	0.000528298	-0.000399966
14.5	-0.000837899	-0.000104631	-0.00045737	-0.00031526	-0.000166404
15	-0.000800327	-0.000367587	3.12834e-06	9.18135e-06	6.71594e-05
15.5	0.000114244	-4.65431e-05	-0.000412373	0.000187623	-0.000576278
16	-0.00102	-0.000747499	-9.7874e-05	-0.000364936	0.000388285
16.5	-0.000395613	0.000157545	-7.53752e-05	0.000690506	-0.000401152
17	-0.000650041	-0.000835411	-0.000344876	-0.000300053	0.000271411
17.5	-0.00061247	0.000361633	0.000115622	2.5389e-05	6.6974e-05
18	-0.000135898	-0.000631324	-0.000299879	5.78305e-05	-0.000722463
18.5	-0.000683326	-0.00031028	1.462e-05	-0.000348728	0.0002421
19	-0.000353755	-0.000135236	-0.000108881	0.000414714	-0.000839337
19.5	-0.000754183	-0.000398192	5.96176e-05	-0.000429845	-0.000167774
20	-0.000862612	-7.71479e-05	-6.38836e-05	4.15966e-05	-0.000372211
20.5	-0.00024104	-0.000632104	-4.13848e-05	-7.29619e-05	-0.000868649
21	-0.000787469	-0.00016506	0.000127114	-0.00018652	9.49144e-05
21.5	-0.000749897	-0.000866016	-0.000288387	0.000138921	-0.000985523
22	-0.000566326	0.000623028	0.000172112	-0.000413637	0.00027004
22.5	-0.000820754	-0.000807928	-0.00024339	0.000349804	-0.000518397
23	-0.000199183	-4.88844e-05	-7.48908e-05	-0.000202754	-0.000284834
23.5	-0.000599611	0.00012616	-0.000344392	0.000121687	9.4729e-05
24	-0.00085404	-0.000574797	-0.000175893	-0.000137871	-0.000401708
24.5	-8.64681e-05	3.82473e-05	-0.000299394	-0.00010543	0.000123855
25	-0.000924897	-0.000808709	-0.000276896	0.000219012	-8.05822e-05
25.5	0.000280675	0.000242335	-0.000108397	-4.05466e-05	-0.000285019
26	-0.000557753	-0.000604621	-0.000231898	-0.000300105	9.45436e-05
26.5	-0.000520182	-0.000575577	0.000374601	0.000170336	-0.000547893
27	-0.00019061	3.74669e-05	-4.09003e-05	-0.000381222	0.000123669
27.5	-0.000883039	-0.000809489	0.000127598	0.000381219	-0.000226768
28	0.000176533	-5.04453e-05	0.000150097	-0.000170339	-0.000577205
28.5	-0.000953896	-0.000751401	-0.000119404	-0.000283897	-5.16418e-05
29	-0.00106	0.000445643	4.90949e-05	0.000332544	-0.000840079
29.5	-0.000440753	-0.000547314	-0.000220406	-0.000511014	0.000415484
30	-0.00113	6.57304e-05	-5.19075e-05	0.000251427	-0.000664953
30.5	0.00036439	-5.12257e-05	-0.000321409	-0.000300131	-0.00013939
31	-0.000912038	-0.000314182	-0.00015291	-0.00012169	-5.18272e-05
31.5	-0.000436467	6.86212e-06	-0.000422411	0.000348752	-0.000840264
32	-0.000398895	-0.000548094	3.80877e-05	-0.000640807	0.000269299
32.5	-0.000507324	6.49499e-05	-0.000231413	0.000705635	-0.000811138
33	0.000260248	-0.000782006	-6.29146e-05	-0.000721924	6.42448e-06
33.5	-0.00087018	0.000269038	-0.000186416	4.05178e-05	-0.000344013
34	-0.000540609	-0.000723918	-0.000163917	-7.30407e-05	-0.00054845
34.5	-0.000649037	-0.000110874	4.58177e-06	-0.000478599	-0.000168887
35	-0.000611466	-0.00051983	-0.000410919	0.000575842	-0.000519324
35.5	-0.000281894	-0.000344787	4.95794e-05	-0.000705716	-0.000285761
36	-0.000682323	-0.000315743	-0.000219922	0.000202725	-5.2198e-05
36.5	-0.000936751	-0.000140699	-0.000197423	-0.000348833	-0.000694635
37	-0.00046118	3.43452e-05	-2.89242e-05	-0.000170392	0.000268928
37.5	-0.00115	-8.26109e-05	-0.000298425	8.05002e-06	-0.000519509
38	-0.000240037	-5.3567e-05	1.60734e-05	-0.000397508	-0.000285946
38.5	-0.00108	-0.000316523	-0.000399428	0.000218933	9.36166e-05
39	-0.000894894	-0.000141479	6.1071e-05	-0.000478625	-0.00084182
39.5	-0.000419322	-0.000258435	-0.00035443	-0.000300184	0.000414742
40	-0.00111	-8.33914e-05	0.000106069	0.000170258	-0.000812695
40.5	-5.21789e-05	-0.000346347	-0.000309433	-0.000527301	0.000151868
41	-0.000890607	0.000120696	5.06625e-06	8.91407e-05	-0.000198569
41.5	-0.000707036	-0.00043426	-0.000410435	-0.000170418	-0.000550006
42	-0.000377464	3.27843e-05	-9.59361e-05	-0.000283976	0.000268557
42.5	-0.00122	-0.000230172	-0.000219437	0.000186465	-0.00066688
43	-1.03213e-05	-5.51279e-05	-0.000196939	-0.000219093	0.000589683
43.5	-0.00129	-0.000318084	-0.00017444	-0.000186652	-0.000199754
44	-0.000665178	-0.00014304	-0.000443941	-0.00030021	0.000179809
44.5	-0.000773607	3.20039e-05	-0.000129442	-0.000413769	0.000121372
45	-0.00103	-0.000522952	-0.000544943	5.66729e-05	6.29346e-05
45.5	-0.000260464	0.000528092	6.15555e-05	-0.000494886	0.000296497
46	-0.00124	-0.000464864	-0.000207946	-0.000170444	9.20604e-05
46.5	-0.000185321	0.00044018	-0.000477447	0.000153997	3.36233e-05
47	-0.00102	-0.000114777	-0.000162948	-0.000397561	0.000267186
47.5	-0.000840177	6.02673e-05	-0.000432449	0.000364881	6.27492e-05
48	-0.000218606	-5.66888e-05	2.80495e-05	-0.000332678	0.000296312
48.5	0.000256966	-0.000465645	-0.000241452	-0.000154236	0.000237875
49	0.000878537	0.000731399	7.30471e-05	2.42051e-05	3.34379e-05
49.5	0.000186109	-0.000553557	-0.000342454	-0.000527353	0.000559001
50	0.00036968	0.000497487	-2.79552e-05	8.90882e-05	-0.000229436
50.5	0.000407252	-5.74692e-05	-0.000151456	-0.00075447	0.000442127
51	0.000444823	0.000409575	-0.000274958	7.97122e-06	9.16896e-05
51.5	0.000774395	6.18639e-07	-0.000106459	-0.000543587	-0.000112747
52	0.000373966	-0.000262337	-0.00037596	-0.000365146	0.000412815
52.5	-2.64621e-05	0.000934706	-6.14612e-05	-4.07042e-05	-0.000521622
53	0.000595109	-0.00049625	-0.000476962	-0.000592263	0.000441941
53.5	0.000194681	0.000116794	-0.000162464	0.000462179	-0.000492496
54	0.000670253	-1.61796e-07	-0.000431965	-0.00067338	-0.000112933
54.5	0.000123824	-0.000263118	-0.000117466	8.90619e-05	0.00012063
55	-0.000130604	0.000349926	-0.000386967	-2.44966e-05	-0.000521807
55.5	0.000490967	-0.00049703	-0.000364468	-0.000284055	0.000587756
56	-0.000201461	0.000846014	-4.99696e-05	0.000478386	-0.000346681
56.5	0.00085811	-0.000584942	-0.000465471	-0.000657172	0.000470882
57	-0.000126318	2.81017e-05	-4.97196e-06	0.00010527	0.000120445
57.5	5.72533e-05	5.71456e-05	-0.000128473	-0.000300289	6.20076e-05
58	0.000386825	-5.98105e-05	4.00257e-05	-0.000267847	0.00073357
58.5	-0.000305604	0.000261233	-8.34755e-05	0.000202594	-5.48666e-05
59	0.00105	-0.000439723	-6.09767e-05	-0.000640964	0.000616696
59.5	0.000207539	0.000465321	-3.84779e-05	-2.45228e-05	0.000266259
60	0.000245111	-0.000381635	-0.000161979	-0.000284081	6.18222e-05
60.5	0.000428682	0.000815409	6.51968e-06	-0.00025164	0.000587385
61	-0.000117746	0.000114453	-0.000116982	7.28017e-05	-5.5052e-05
61.5	0.00109	0.000435497	0.000197517	-0.000332757	0.000178511
62	-0.000188603	0.000464541	-0.000217984	-0.000154315	0.000266074
62.5	0.000286969	-0.000382415	9.65149e-05	2.41263e-05	-0.000522363
63	0.00017854	0.000668629	-0.000318986	-0.000235432	0.0004412
63.5	7.01117e-05	-0.000471327	-4.48748e-06	0.000235009	-0.000347237
64	0.000837683	0.000580716	-0.000419989	-0.000316549	0.000324326
64.5	-7.4524e-07	2.57604e-05	-0.00025149	-0.000138108	0.000265888
65	0.000328826	-9.11957e-05	-0.000374991	0.000186334	-0.000523549
65.5	0.000366398	0.000375848	-0.000498492	-0.000511225	0.000733014
66	0.000257969	-0.000326108	-0.000183993	0.000397217	-0.000348423
66.5	0.00103	0.00102	-0.000599495	-0.000446341	0.00090814
67	0.000625112	2.49799e-05	-0.000138996	0.0001701	0.000119703
67.5	0.000662684	0.000492024	-0.000554497	5.65416e-05	-8.5734e-05
68	0.00114	0.000229068	-0.000239998	-0.000349017	0.000586829
68.5	0.000883827	0.000404112	-0.000655499	0.000413425	-0.000348608
69	0.0018	0.000579156	-0.000341001	-0.000430134	0.000615955
69.5	0.00095897	2.41995e-05	-0.000902502	0.000186308	-0.000319482
70	0.00143	0.00122	-0.000588003	7.27492e-05	0.000206081
70.5	0.00147	-6.47127e-05	-0.001	-0.000332809	1.6435e-06
71	0.00107	0.000695331	-0.000835005	0.000575632	-0.000202794
71.5	0.00228	0.000286375	-0.000812507	-0.000559926	3.07693e-05
72	0.00129	-0.000123581	-0.00108	0.000640515	-0.000173668
72.5	0.00235	0.000490463	-0.000913509	8.89568e-05	-0.000378105
73	0.00166	-0.000357493	-0.00133	0.000121398	1.45811e-06
73.5	0.00199	0.00113	-0.000868511	0.00015384	-0.000640979
74	0.00232	-0.000153405	-0.00143	-0.000251719	-0.000407416
74.5	0.00206	0.000898639	-0.000969514	0.000656723	-0.000757853
75	0.00269	0.000343683	-0.00153	-0.000186836	-0.00111
75.5	0.00258	0.000518726	-0.00136	0.000137606	-0.000436727
76	0.00247	0.00025477	-0.00149	2.40475e-05	-0.00166
76.5	0.00294	-8.18571e-06	-0.00161	5.6489e-05	-0.000991601
77	0.00284	0.00104	-0.00144	0.000380931	-0.00134
77.5	0.00317	-9.60979e-05	-0.00186	0.000121372	-0.00169
78	0.0032	0.000955946	-0.00154	0.000153814	-0.00117
78.5	0.0028	0.00025399	-0.0021	4.02551e-05	-0.00239
79	0.00342	0.000429034	-0.00179	-0.000219303	-0.00128
79.5	0.00332	0.000166078	-0.00235	0.000397138	-0.00251
80	0.00394	0.000341122	-0.00189	-8.42028e-06	-0.00199
80.5	0.00383	0.000224166	-0.00245	-0.000121979	-0.00219
81	0.00314	-3.87905e-05	-0.00199	0.000202463	-0.00283
81.5	0.00464	0.000867253	-0.00255	-0.000350096	-0.00216
82	0.0035	-0.000272703	-0.00224	0.000413346	-0.00324
82.5	0.00456	0.00107	-0.00265	-0.000139213	-0.00242
83	0.00416	7.73852e-05	-0.00249	-0.000252771	-0.00321
83.5	0.0042	0.000398429	-0.00261	0.00021867	-0.00356
84	0.00512	0.000427473	-0.00273	-0.000625888	-0.00318
84.5	0.00428	-0.000127483	-0.00286	0.000429553	-0.00383
85	0.00534	0.000631561	-0.00327	-0.000707005	-0.00345
85.5	0.00479	-0.000215395	-0.00281	-0.000236563	-0.0038
86	0.00483	0.000982649	-0.0025	-0.000204122	-0.00444
86.5	0.0053	0.000134693	-0.00174	-0.00060968	-0.00406
87	0.00519	0.000455736	-0.00216	0.000299761	-0.0047
87.5	0.00596	0.00019278	-0.00199	-0.000544797	-0.00432
88	0.00571	-0.000216176	-0.00226	0.000217644	-0.00467
88.5	0.00545	0.000250868	-0.00209	0.000104086	-0.00517
89	0.00578	-0.000596088	-0.00207	-0.000447473	-0.00479
89.5	0.00582	0.000892956	-0.00234	0.000607969	-0.00558
90	0.00644	-0.000392	-0.00203	-0.00067459	-0.00535
90.5	0.00633	0.000367044	-0.00244	8.78518e-05	-0.00555
91	0.00593	0.000104088	-0.00227	-0.000463707	-0.00634
91.5	0.00699	-1.28683e-05	-0.00269	-0.000431265	-0.00581
92	0.00615	0.000308176	-0.00237	-0.000106824	-0.00689
92.5	0.00765	-0.00068478	-0.00264	-0.000804382	-0.00637
93	0.00696	0.000366263	-0.00247	-0.000479941	-0.00701
93.5	0.007	-0.000480693	-0.00274	-0.000593499	-0.00751
94	0.00762	0.000716351	-0.0017	-0.000707058	-0.00683
94.5	0.00707	-0.000568605	-0.00211	-9.0616e-05	-0.00792
95	0.00857	-0.000101561	-0.00282	-0.000642175	-0.00695
95.5	0.00729	7.3483e-05	-0.00251	-0.000317733	-0.00789
96	0.00777	-0.000481473	-0.00292	-0.000139291	-0.0078
96.5	0.00781	-1.44292e-05	-0.00261	-0.00083685	-0.00742
97	0.0077	-0.000715385	-0.00288	-7.44084e-05	-0.00865
97.5	0.00876	-0.000102341	-0.00286	-0.000625967	-0.00783
98	0.00821	-0.000949297	-0.00298	-0.000447525	-0.00891
98.5	0.0084	0.000247746	-0.0031	-0.000269084	-0.00868
99	0.00931	-0.00074521	-0.00308	-0.000820642	-0.00873
99.5	0.00891	-0.000278166	-0.00335	8.77992e-05	-0.00938
100	0.00895	-0.000103122	-0.00333	-0.00105	-0.00914
100.5	0.00942	-0.000658078	-0.0036	6.68228e-06	-0.00979
101	0.00902	-4.5034e-05	-0.00343	-0.000690876	-0.0097
101.5	0.01037	-0.00089199	-0.00399	-0.000658435	-0.00976
102	0.00953	0.000159054	-0.00353	-0.000187993	-0.01011
102.5	0.00957	-0.000395902	-0.00409	-0.00103	-0.00987
103	0.01034	-0.000366858	-0.00378	0.00031489	-0.01037
103.5	0.00979	-4.58144e-05	-0.00419	-0.000820669	-0.01058
104	0.01071	-0.00074677	-0.00373	-0.000496227	-0.01005
104.5	0.01016	-0.000425727	-0.004	-0.000755786	-0.01128
105	0.01034	-0.000980683	-0.00427	-0.000723344	-0.01046
105.5	0.01097	-7.56387e-05	-0.00396	-0.000398902	-0.01168
106	0.01056	-0.000338595	-0.00452	-0.000658461	-0.01131
106.5	0.01016	-0.000601551	-0.00406	-0.000772019	-0.01107
107	0.01137	-0.000134507	-0.00462	-0.000885578	-0.01215
107.5	0.01068	-0.000981463	-0.0043	-0.000853136	-0.01119
108	0.01101	-7.64192e-05	-0.00472	-0.000528695	-0.01256
108.5	0.01163	-0.000777375	-0.00455	-0.000788253	-0.01174
109	0.01079	0.000419669	-0.00482	-0.000755812	-0.01239
109.5	0.012	-0.000573287	-0.0048	-0.00072337	-0.01288
110	0.01145	-0.000398244	-0.00492	-0.00113	-0.01221
110.5	0.01163	-0.0002232	-0.00505	-0.000512487	-0.01344
111	0.01196	-0.000924156	-0.00488	-0.000918046	-0.01277
111.5	0.012	-0.000457112	-0.00529	-0.00103	-0.01356
112	0.0116	-0.00116	-0.00498	-0.000707163	-0.01361
112.5	0.01295	3.8976e-05	-0.00539	-0.00155	-0.01353
113	0.01226	-0.00080798	-0.00508	-0.00035028	-0.01417
113.5	0.01186	-0.000632936	-0.00564	-0.00149	-0.01408
114	0.01336	-0.000311892	-0.00533	-0.00102	-0.01414
114.5	0.01223	-0.00101	-0.00545	-0.000982955	-0.01493
115	0.0127	-0.000399804	-0.00587	-0.00168	-0.0144
115.5	0.01332	-0.00125	-0.00555	-0.000480072	-0.01504
116	0.01292	9.62834e-05	-0.00611	-0.00162	-0.01496
116.5	0.01281	-0.00119	-0.00565	-0.000707189	-0.01502
117	0.01387	-0.000429629	-0.00621	-0.000820747	-0.0158
117.5	0.01377	-0.000692585	-0.0059	-0.00137	-0.01528
118	0.01439	-0.000809541	-0.00646	-0.000463864	-0.01621
118.5	0.01428	-0.000634497	-0.006	-0.0016	-0.01583
119	0.01359	-0.00134	-0.00642	-0.000982981	-0.01604
119.5	0.01538	-0.000138409	-0.00625	-0.00139	-0.01683
120	0.01425	-0.00113	-0.00652	-0.0015	-0.01601
120.5	0.01414	-0.000518321	-0.00635	-0.00103	-0.01738
121	0.01505	-0.000635277	-0.00662	-0.00188	-0.01642
121.5	0.01436	-0.00134	-0.00674	-0.0014	-0.01735
122	0.01615	-0.00013919	-0.00657	-0.00166	-0.01727
122.5	0.01487	-0.00143	-0.00684	-0.00163	-0.01747
123	0.01506	-0.000373102	-0.00667	-0.00116	-0.01797
123.5	0.01553	-0.00108	-0.00709	-0.00171	-0.01744
124	0.01528	-0.000607014	-0.00677	-0.00153	-0.01838
124.5	0.01546	-0.00116	-0.00719	-0.00136	-0.018
125	0.01623	-0.000987926	-0.00717	-0.00176	-0.0182
125.5	0.01597	-0.000519882	-0.007	-0.000999241	-0.0187
126	0.01733	-0.000929838	-0.00742	-0.00184	-0.01832
126.5	0.01722	-0.00105	-0.0071	-0.00152	-0.01911
127	0.01798	-0.00087175	-0.00766	-0.00149	-0.01902
127.5	0.01758	-0.00113	-0.00735	-0.00204	-0.01937
128	0.01864	-0.000959663	-0.00776	-0.00113	-0.01957
128.5	0.01839	-0.00137	-0.00774	-0.00212	-0.01949
129	0.01857	-0.000755575	-0.00786	-0.00165	-0.02013
129.5	0.01905	-0.00116	-0.00784	-0.00191	-0.02019
130	0.01879	-0.00128	-0.00782	-0.00188	-0.02025
130.5	0.02	-0.000668443	-0.00794	-0.00155	-0.02074
131	0.01916	-0.00152	-0.00792	-0.0021	-0.02051
131.5	0.01964	-0.00119	-0.00819	-0.00134	-0.02071
132	0.01997	-0.00131	-0.00788	-0.00218	-0.02106
132.5	0.01942	-0.000698267	-0.00829	-0.00171	-0.02054
133	0.02106	-0.00125	-0.00798	-0.00197	-0.02147
133.5	0.01979	-0.00137	-0.00825	-0.00194	-0.02109
134	0.02055	-0.000757136	-0.00837	-0.00147	-0.02159
134.5	0.02059	-0.0016	-0.0082	-0.00202	-0.02165
135	0.02063	-0.000991048	-0.00862	-0.00199	-0.02141
135.5	0.02169	-0.00169	-0.00845	-0.00196	-0.0225
136	0.021	-0.00093296	-0.00886	-0.00207	-0.02212
136.5	0.02089	-0.0012	-0.00869	-0.00175	-0.02276
137	0.0218	-0.00131	-0.00896	-0.00201	-0.02267
137.5	0.02082	-0.000845828	-0.00894	-0.00197	-0.02258
138	0.021	-0.00184	-0.00892	-0.00194	-0.02352
138.5	0.02133	-0.00093374	-0.00919	-0.0022	-0.02255
139	0.02093	-0.00178	-0.00902	-0.00173	-0.02393
139.5	0.02228	-0.000437653	-0.00944	-0.00199	-0.02311
140	0.02174	-0.00128	-0.00912	-0.00225	-0.02375
140.5	0.02134	-0.000963565	-0.00954	-0.00163	-0.02396
141	0.02254	-0.000934521	-0.00922	-0.00248	-0.02358
141.5	0.02156	-0.00149	-0.00978	-0.00142	-0.02466
142	0.0232	-0.000292433	-0.00932	-0.00241	-0.02398
142.5	0.02178	-0.00187	-0.00988	-0.00209	-0.02463
143	0.02255	-0.000964345	-0.00957	-0.00205	-0.02469
143.5	0.02244	-0.00137	-0.00984	-0.00246	-0.02475
144	0.02233	-0.00149	-0.01011	-0.00141	-0.02524
144.5	0.02295	-0.00161	-0.00979	-0.00269	-0.02515
145	0.02255	-0.00202	-0.01021	-0.00193	-0.0255
145.5	0.02244	-0.000965126	-0.0099	-0.00218	-0.02571
146	0.02292	-0.00196	-0.01031	-0.00259	-0.02562
146.5	0.02266	-0.00105	-0.01	-0.00154	-0.02612
147	0.02358	-0.00146	-0.01056	-0.00282	-0.02588
147.5	0.02318	-0.00114	-0.01024	-0.00205	-0.02623
148	0.02292	-0.00155	-0.01066	-0.00246	-0.02673
148.5	0.02384	-0.00152	-0.01064	-0.00228	-0.02621
149	0.02373	-0.0012	-0.01047	-0.00196	-0.02685
149.5	0.02449	-0.00175	-0.01074	-0.00266	-0.02676
150	0.02424	-0.00114	-0.01057	-0.00233	-0.02682
150.5	0.02355	-0.00155	-0.01113	-0.00244	-0.02761
151	0.02475	-0.00138	-0.01067	-0.00241	-0.02694
151.5	0.02377	-0.00164	-0.01138	-0.00209	-0.02816
152	0.02541	-0.00161	-0.01092	-0.00264	-0.02735
152.5	0.02414	-0.00129	-0.01133	-0.00246	-0.02799
153	0.02417	-0.00184	-0.01102	-0.00228	-0.02848
153.5	0.02494	-0.00108	-0.01114	-0.00254	-0.02781
154	0.02425	-0.00135	-0.01141	-0.00207	-0.02889
154.5	0.02589	-0.00132	-0.01124	-0.00262	-0.02808
155	0.02432	-0.00144	-0.01166	-0.0023	-0.02872
155.5	0.02509	-0.00155	-0.01134	-0.00241	-0.02921
156	0.02513	-0.00138	-0.01191	-0.00296	-0.02854
156.5	0.02487	-0.00164	-0.01145	-0.00249	-0.02962
157	0.02652	-0.00147	-0.01201	-0.00304	-0.02881
157.5	0.02495	-0.00144	-0.01184	-0.00272	-0.02974
158	0.02557	-0.00155	-0.01182	-0.00254	-0.02965
158.5	0.02546	-0.00152	-0.01194	-0.00309	-0.02942
159	0.0255	-0.00179	-0.01206	-0.00218	-0.03035
159.5	0.02627	-0.00147	-0.01219	-0.00317	-0.02954
160	0.02572	-0.00187	-0.01202	-0.00212	-0.03062
160.5	0.02576	-0.00126	-0.01243	-0.00296	-0.03053
161	0.02623	-0.00138	-0.01241	-0.00264	-0.03044
161.5	0.0254	-0.0015	-0.01283	-0.00246	-0.03123
162	0.02689	-0.00147	-0.01266	-0.00287	-0.03056
162.5	0.02576	-0.00188	-0.01293	-0.00225	-0.03149
163	0.02595	-0.00155	-0.01305	-0.0028	-0.03111
163.5	0.02657	-0.00182	-0.01274	-0.00262	-0.03132
164	0.02588	-0.00164	-0.01315	-0.00259	-0.03152
164.5	0.02737	-0.00118	-0.01284	-0.00285	-0.03144
165	0.02624	-0.00202	-0.01325	-0.00253	-0.03208
165.5	0.02672	-0.00141	-0.01294	-0.00278	-0.03184
166	0.0269	-0.00196	-0.01321	-0.00304	-0.03234
166.5	0.02636	-0.00121	-0.01304	-0.00272	-0.03255
167	0.02785	-0.00191	-0.01316	-0.00313	-0.03246
167.5	0.02672	-0.00159	-0.01329	-0.00251	-0.03281
168	0.02691	-0.00141	-0.01326	-0.00291	-0.03272
168.5	0.02709	-0.00211	-0.01339	-0.00303	-0.03293
169	0.02669	-0.00135	-0.01337	-0.00241	-0.03328
169.5	0.0276	-0.00235	-0.01364	-0.00326	-0.03304
170	0.02735	-0.00129	-0.01347	-0.00205	-0.03339
170.5	0.02695	-0.00185	-0.01388	-0.00334	-0.03345
171	0.02772	-0.00167	-0.01371	-0.00257	-0.03307
171.5	0.02732	-0.00135	-0.01413	-0.00298	-0.03386
172	0.02823	-0.0022	-0.01396	-0.00309	-0.03334
172.5	0.02812	-0.00173	-0.01423	-0.00248	-0.03398
173	0.02728	-0.00243	-0.01435	-0.00347	-0.03418
173.5	0.02893	-0.00153	-0.01433	-0.00285	-0.03395
174	0.02765	-0.00238	-0.0146	-0.00311	-0.03488
174.5	0.029	-0.00162	-0.01429	-0.00308	-0.03407
175	0.0286	-0.00188	-0.0147	-0.0029	-0.03485
175.5	0.0282	-0.00214	-0.01424	-0.00345	-0.03477
176	0.02955	-0.00153	-0.0148	-0.00298	-0.03482
176.5	0.02798	-0.00252	-0.01449	-0.00309	-0.03561
177	0.0289	-0.00133	-0.0149	-0.00306	-0.0348
177.5	0.02908	-0.00232	-0.01459	-0.00288	-0.03602
178	0.02853	-0.00141	-0.01515	-0.00329	-0.03521
178.5	0.02959	-0.00168	-0.01469	-0.00326	-0.03585
179	0.02846	-0.00194	-0.01525	-0.00293	-0.03605
179.5	0.02996	-0.00162	-0.01494	-0.00348	-0.03567
180	0.02912	-0.00247	-0.01535	-0.00272	-0.03661
