# Supplementary material for: Impact of energy limitations on function and resilience in long-wavelength Photosystem II
Source: eLife. 2022 Jul 19;11:e79890. doi: 10.7554/eLife.79890 (PMC9439682; doi:10.7554/eLife.79890)
Supplement: Appendix 6—figure 4—source data 1. [file elife-79890-app6-fig4-data1.xlsx]

## Sheet: A. marina
Replicate 1						Replicate 2						Replicate 3
	Acceptors	DCMU	DCMU+His	DCMU+His+NaN3			Acceptors	DCMU	DCMU+His	DCMU+His+NaN3			Acceptors	DCMU	DCMU+His
-60	-0.000159366	-2.06335e-05	0.000267383	0.00024332		0	-6.92348e-05	-0.000114373	-0.000575586	-0.000182		0	-8.52619e-05	-0.000371703	-0.000339213
-59.5	-0.000478495	-0.00122	7.25549e-05	3.7601e-05		0.5	-0.000291347	0.000160603	-5.55844e-05	0.000101922		0.5	0.00033803	4.43465e-05	-0.000439359
-59	-3.56236e-05	-0.00102	-0.000884274	-4.01177e-05		1	-0.000514458	0.000435578	-0.000668582	-0.000118156		1	-3.66784e-05	-7.16044e-05	-0.000273505
-58.5	-0.000354752	-0.00133	-0.000696102	0.000645164		1.5	-0.00035957	-0.000171446	-2.35805e-05	3.9766e-05		1.5	0.000386613	-0.000187555	-0.000506651
-58	-0.000165881	-0.000753081	-0.00076393	5.84451e-05		2	-0.000456682	-2.24707e-05	-0.000133579	-5.43122e-05		2	0.000144905	9.54938e-05	-0.000340798
-57.5	-0.00023101	-0.000808943	0.000186241	-0.000146274		2.5	7.52062e-05	-0.000125495	-0.000620577	-0.00052539		2.5	3.61967e-05	-0.000153457	-0.000706944
-57	-0.000296139	-0.000610805	-0.000515587	0.000157008		3	-0.000398906	-0.00022752	-0.000101575	9.53153e-06		3	0.000326488	0.000129592	-0.00040809
-56.5	-0.000234267	-0.000666667	-0.000583415	-0.000301711		3.5	0.000132983	4.64558e-05	-0.000211573	-8.45466e-05		3.5	-4.82199e-05	-0.000252359	-0.000641236
-56	-0.000299396	-0.000341529	-0.00103	0.000891571		4	-8.91292e-05	-0.000307569	-0.000447571	-0.000177625		4	0.000375072	0.00016369	-0.000475382
-55.5	-0.000110525	-0.00039739	0.000299928	5.08519e-05		4.5	6.4759e-05	0.000218407	-0.000305569	-2.07029e-05		4.5	3.63585e-07	-8.52607e-05	-0.000575528
-55	-0.000175654	-0.000199252	-0.0005299	-2.68668e-05		5	-0.000157353	-0.000135618	-0.000540567	-0.000365781		5	0.000157655	-6.82116e-05	-0.000808674
-54.5	1.32177e-05	-0.000382114	-0.000469729	0.000149415		5.5	-0.000380465	0.000264358	-2.15649e-05	0.000421141		5.5	0.000181947	8.18375e-05	-0.000376821
-54	-0.000179911	-0.000310976	0.000353443	7.1696e-05		6	2.64236e-05	0.000539333	-0.000508563	-0.000301937		6	7.32387e-05	-0.000167113	-0.000609967
-53.5	0.00013696	-0.000366838	0.000159615	0.000374977		6.5	-7.06882e-05	5.83087e-05	-0.000241561	-1.80155e-05		6.5	0.00036353	0.000248936	-0.000311113
-53	-5.61685e-05	8.53002e-05	-0.000543214	0.000805259		7	-0.0004198	8.12842e-05	-0.000351559	-0.000238094		7	-1.11778e-05	-0.000266015	-0.000411259
-52.5	0.000133703	-0.000224562	-0.000483042	0.00034654		7.5	-1.29118e-05	-0.00027274	-0.000460557	0.000170828		7.5	0.000279114	0.000150034	-0.000245405
-52	-5.9426e-05	0.000354576	-0.000803871	-0.000240179		8	-0.000236024	0.000253235	-0.000193555	0.00020275		8	3.74056e-05	-0.000231917	-0.000478551
-51.5	0.000129445	-0.000336285	0.000400301	6.31028e-05		8.5	0.000421865	0.000150211	-0.000428553	-1.63281e-05		8.5	6.16973e-05	5.1132e-05	-0.000445697
-51	-0.000189683	-0.000138147	7.84727e-05	-0.000522616		9	-0.000430247	4.81861e-05	-0.000287551	1.55937e-05		9	0.000218989	-6.48189e-05	-0.000412843
-50.5	0.000126188	-6.70092e-05	1.16444e-05	-9.23345e-05		9.5	0.000102641	-0.000306838	-0.000271549	-0.000204484		9.5	-2.27192e-05	-4.77698e-05	-0.00051299
-50	-0.000192941	-0.000758871	-0.000691184	0.000210947		10	0.000131529	9.41371e-05	-0.000506547	7.94374e-05		10	0.000134572	0.000235279	-0.000214136
-49.5	0.00024993	-0.00107	-0.000376012	6.22821e-06		10.5	-0.000343583	-0.000134887	1.24547e-05	-0.000140641		10.5	0.000158864	-0.000146672	-0.000580282
-49	-0.000196198	-0.000616595	-0.000570841	-0.00032549		11	6.33056e-05	1.40881e-05	-0.000600543	-0.000108719		11	-8.28441e-05	3.37751e-06	-0.000148428
-48.5	0.000119673	-0.000799457	0.000379331	0.000104791		11.5	9.21938e-05	0.000288064	4.44586e-05	0.000175203		11.5	0.000207448	2.04266e-05	-0.000647574
-48	-0.000199456	-0.000220319	-0.000195497	-0.000353928		12	-0.000130918	-0.000191961	-6.55394e-05	-0.000296875		12	9.87394e-05	-0.000228524	-0.00021572
-47.5	0.000243415	-0.000530181	-0.000262326	7.63537e-05		12.5	-0.00010203	-4.29854e-05	-0.000678537	0.000239047		12.5	0.000256031	0.000187525	-0.000581866
-47	5.12867e-05	-0.000841042	-0.000711154	0.000379635		13	-0.000324142	0.00023199	-0.000159535	-0.000233031		13	1.43228e-05	-0.000194426	-0.000150012
-46.5	0.000113158	-6.90428e-06	0.000239017	4.79164e-05		13.5	8.17466e-05	0.000254966	-0.000394534	5.08904e-05		13.5	3.86145e-05	0.000221623	-0.000383159
-46	-7.99708e-05	-0.000698766	-0.000336811	-0.000283802		14	-1.53652e-05	0.000277941	-0.000127532	-0.000420188		14	0.000195906	-2.73279e-05	-0.000350305
-45.5	-0.0001451	-0.00101	-0.000149639	-0.000743521		14.5	-0.000489477	-0.000203083	-0.00023653	-0.000262266		14.5	-0.000178802	0.000122721	-0.000184451
-45	4.37717e-05	-0.00055649	-0.000724468	-0.00044024		15	-8.35888e-05	0.000323892	-0.000346528	-0.000356344		15	0.00037749	0.00013977	-0.000550597
-44.5	-2.1357e-05	-0.000739352	-0.000156296	-0.000135958		15.5	-0.000305701	9.48675e-05	-7.95257e-05	-0.000324422		15.5	-0.000130219	2.38194e-05	-0.000118743
-44	4.05142e-05	-0.000159214	0.000158876	-8.66768e-05		16	-2.58124e-05	0.000243843	-0.000314524	-0.0001665		16	2.70731e-05	0.000306868	-0.000484889
-43.5	0.000102386	-0.000978076	0.000219047	-0.000546395		16.5	-0.000247924	1.48185e-05	7.84782e-05	-0.000638579		16.5	0.000317365	-0.000208082	-0.000319035
-43	3.72568e-05	0.000364063	-0.000737781	-0.000116114		17	-0.000471036	-8.82061e-05	0.00022048	-0.000102657		17	-5.73435e-05	7.49667e-05	-0.000419181
-42.5	-2.7872e-05	-0.000581799	-0.000169609	0.000569167		17.5	6.08522e-05	0.000186769	-0.000140518	-0.000700735		17.5	0.000365948	-0.000173984	-0.000253328
-42	0.000160999	-0.000510661	0.000144562	-1.75514e-05		18	-0.00016126	-0.000168255	4.84094e-07	-0.000164813		18	0.00012424	-2.39352e-05	-0.000353474
-41.5	-3.11294e-05	-0.00108	0.000204734	-0.00022227		18.5	-6.37144e-06	0.00010672	-0.000486514	-0.000510891		18.5	0.000281532	-0.000139886	-0.00045362
-41	0.000284742	-0.000241385	-0.000497094	8.10114e-05		19	2.25168e-05	-0.000373304	-0.000218512	-0.000100969		19	0.000172823	-0.000122837	-0.000287766
-40.5	-3.43869e-05	-0.000551247	7.10771e-05	-0.000377707		19.5	-7.4595e-05	2.66714e-05	-0.00032851	-6.90474e-05		19.5	-6.88849e-05	2.72121e-05	-0.000520912
-40	0.000281484	-0.000734109	0.000512249	-0.000328426		20	8.02932e-05	4.96469e-05	-0.000186508	-0.000541126		20	8.84069e-05	4.42612e-05	-0.000222058
-39.5	-3.76444e-05	-0.000790971	0.00031842	0.000101855		20.5	-0.000268819	7.26224e-05	8.04939e-05	0.000120796		20.5	-2.03014e-05	0.00019431	-0.000588204
-39	0.000405227	-0.000591832	-0.000256408	2.41368e-05		21	-0.00011393	0.000599598	-0.000406504	-0.000603282		21	3.9903e-06	0.000211359	-0.000156351
-38.5	8.60981e-05	-0.000266694	-0.000196236	-0.000180582		21.5	-0.000463042	-0.000258427	-1.25022e-05	0.00018464		21.5	0.000294282	-3.75915e-05	-0.000522497
-38	0.000274969	-0.000704556	0.000371935	0.0005047		22	-0.000434154	-0.000109451	0.0001285	-0.000161438		22	5.25737e-05	0.000245458	-9.06428e-05
-37.5	8.28407e-05	0.000510582	0.000432107	-8.20191e-05		22.5	9.87341e-05	3.85243e-05	1.95017e-05	-3.5163e-06		22.5	0.000342865	-0.000136493	-0.000456789
-37	0.000144712	-0.00030728	-0.000397721	-3.27377e-05		23	1.62234e-06	6.14998e-05	0.000412504	-9.75944e-05		23	0.000234157	0.000146556	-0.000157935
-36.5	7.85832e-05	-0.000745142	4.44503e-05	0.000270544		23.5	-0.000221489	0.000588475	5.15056e-05	-0.000443673		23.5	0.000258449	-0.000235395	-0.000524081
-36	0.000140454	-0.000547004	0.000485622	0.000319825		24	5.93987e-05	-0.000143549	6.75076e-05	0.000218249		24	0.000415741	4.7654e-05	-0.000225227
-35.5	0.000202326	-0.000221866	0.000418794	-0.000520894		24.5	-3.77131e-05	0.000130426	-0.00029449	-0.000253829		24.5	4.10323e-05	6.47031e-05	-0.000325373
-35	0.000137197	-0.000277728	-0.000411035	-8.96123e-05		25	0.000243175	2.84017e-05	-2.64885e-05	0.000156093		25	0.000331324	-5.12478e-05	-0.00042552
-34.5	0.000199068	0.000175411	-0.000223863	8.66691e-05		25.5	-0.000231937	-7.46228e-05	-0.000262487	-6.39852e-05		25.5	-0.000176384	9.88013e-05	-0.000259666
-34	0.000133939	-8.45128e-06	0.000217308	0.00026295		26	-0.000454048	0.000325353	-0.000120485	9.39367e-05		26	0.000113907	-1.71496e-05	-0.000492812
-33.5	0.000322811	0.000444687	0.00027748	-6.97682e-05		26.5	-0.00042516	0.000222328	0.000272517	-1.41491e-07		26.5	0.000138199	0.000265899	-0.000193958
-33	0.000130682	-0.000120175	-0.000297348	-0.000274487		27	-0.000522272	0.000120304	-0.000214481	3.17804e-05		27	-0.000103509	1.69486e-05	-0.000560104
-32.5	0.000319553	-0.000176037	0.000143823	0.000537795		27.5	9.61612e-06	-0.000108721	0.000304521	0.000189702		27.5	0.000319783	0.000299998	-0.00026125
-32	0.000127425	0.000276101	0.000712995	0.000333076		28	-0.000213496	-8.57453e-05	6.95233e-05	-0.000281376		28	7.80744e-05	-8.19533e-05	-0.000494396
-31.5	0.000316296	-3.37607e-05	0.000264167	-0.000253643		28.5	-5.86075e-05	-0.00018877	8.55252e-05	1.54591e-06		28.5	0.000368366	0.000334096	-0.000328542
-31	0.000124167	-0.000725623	-5.66617e-05	-0.000204361		29	-0.000406719	-0.000165794	0.000352527	3.34678e-05		29	0.000392658	-4.78551e-05	-0.000295689
-30.5	0.000440038	-1.84844e-05	-0.00050549	-0.00028208		29.5	-0.000377831	0.000235181	-0.000134471	-0.00018561		29.5	-0.00011505	-0.000163806	-0.000395835
-30	0.00012091	-0.000837346	-0.000191318	0.000530201		30	0.000154057	-0.000496843	0.000259531	0.000475311		30	0.000175241	0.000252243	-0.000229981
-29.5	0.000563781	0.000377792	0.000250853	-5.65173e-05		30.5	-0.000320055	2.91321e-05	-0.000480467	-0.000499767		30.5	-6.64671e-05	-0.000129708	-0.000596127
-29	-1.03479e-05	-0.00069507	0.000184025	-0.000134236		31	8.58335e-05	-0.000325892	0.000291535	0.000539155		31	-4.21753e-05	0.000153341	-0.000297273
-28.5	0.000178523	-0.000369932	-0.000391804	0.000296045		31.5	-0.000514278	-0.000176917	0.000307537	6.7077e-05		31.5	0.000248116	-9.56096e-05	-0.000530419
-28	-1.36054e-05	-0.000679794	-0.000331632	-0.000289673		32	-0.00035939	0.000475059	-5.44611e-05	0.000350999		32	6.4081e-06	5.44395e-05	-9.85653e-05
-27.5	0.000430266	-0.000227656	0.00049154	0.00103		32.5	0.000172498	-0.000130966	0.000339541	0.000256921		32.5	0.0004297	7.14886e-05	-0.000464711
-27	0.000110137	-0.00105	4.27114e-05	0.000189889		33	-0.000175614	1.80095e-05	-0.000274457	0.000414843		33	-7.80085e-05	-4.44623e-05	-0.000165858
-26.5	0.000426008	-0.000339379	-0.000405117	0.000112171		33.5	-0.000272725	0.000166985	0.000119545	0.000194764		33.5	0.000345283	0.000238587	-0.000399004
-26	-2.01203e-05	-0.000395241	-0.000217945	3.44522e-05		34	-0.000117837	-0.000439039	-0.000116453	0.000101686		34	0.000103575	-0.000143364	-0.00010015
-25.5	0.000422751	-0.000451103	0.000478226	-4.32664e-05		34.5	-8.89491e-05	-3.9064e-05	2.55487e-05	0.000258608		34.5	0.000127867	0.000272685	-0.000200296
-25	0.000103622	-0.000634965	0.000156398	-0.000248985		35	0.000316939	-0.000142089	0.000167551	-0.00021247		35	0.000285158	-0.000242266	-0.000433442
-24.5	0.000419493	-0.000181827	-0.00041843	0.000436296		35.5	-0.000157173	-0.000244113	-0.000194447	7.14518e-05		35.5	-8.95499e-05	0.000173783	-0.000134588
-24	0.000100365	-0.001	0.000658741	-0.000150422		36	-0.000128285	-9.61375e-05	0.000325555	-0.000400626		36	0.000333742	-7.51677e-05	-0.000367734
-23.5	0.000416236	-0.000293551	8.29129e-05	0.000280859		36.5	-0.000225396	-0.000198162	-0.000288443	0.000135296		36.5	9.20336e-05	-5.81186e-05	-6.88805e-05
-23	9.71073e-05	-0.000350413	-0.000110915	0.00020314		37	5.54919e-05	0.000201813	-0.000146442	-0.000336783		37	0.000116325	0.00022493	-0.000568027
-22.5	0.000412979	-0.000406275	-0.000686744	0.000252422		37.5	-4.16199e-05	-2.72111e-05	-4.43954e-06	-0.000304861		37.5	0.000273617	-0.00015702	-0.000136173
-22	0.00022085	-0.000589136	-0.000117572	-0.000334297		38	-0.000264732	0.000121764	1.15624e-05	0.000231061		38	3.19087e-05	0.000126029	-0.000502319
-21.5	0.000409721	-0.000136998	0.000323599	0.000858984		38.5	0.000142156	0.00014474	0.000153564	0.000136983		38.5	0.0004552	-0.000122922	-0.000203465
-21	0.000344592	-0.00031986	0.000256771	1.82658e-05		39	-0.000206955	-8.32846e-05	-8.24337e-05	4.29048e-05		39	0.000346492	0.000160127	-0.000569611
-20.5	0.000406464	-0.000248722	-0.000700057	0.000449547		39.5	7.39329e-05	0.000316691	0.000311568	0.000200827		39.5	-2.82161e-05	0.000310176	-0.000403757
-20	0.000213335	-0.000304584	0.00101	0.000243829		40	-0.000149179	-0.000289334	-5.04298e-05	-1.92515e-05		40	0.000395076	-7.1775e-05	-0.000503903
-19.5	-0.000232794	0.000402554	-7.1714e-05	3.91099e-05		40.5	-0.000497291	-1.43582e-05	-3.44278e-05	0.00026467		40.5	2.03673e-05	0.000344274	-0.00047105
-19	0.000465077	-0.000416308	-0.000265542	8.83913e-05		41	-9.14025e-05	0.000133617	0.000107574	-8.14078e-05		41	0.000443659	-3.76768e-05	-0.000438196
-18.5	-0.000363051	-0.00047217	0.000557629	0.000773673		41.5	-6.25143e-05	-0.000346407	-2.42388e-06	-4.9486e-05		41.5	0.000201951	0.000245372	-0.000538342
-18	-0.00017418	-0.000528031	0.000490801	5.9954e-05		42	-0.000284626	0.000305568	0.000139578	0.000108436		42	9.32425e-05	0.000129421	-0.000372488
-17.5	-0.000621309	-0.000329893	-0.000212027	0.000363235		42.5	-4.73793e-06	7.75438e-05	0.00015558	0.000266358		42.5	0.000383534	1.34705e-05	-0.000605634
-17	7.65624e-05	-4.7552e-06	-0.000151856	0.000412517		43	-0.00060485	-2.54807e-05	-8.0418e-05	-0.00033072		43	8.82591e-06	0.00016352	-0.00017378
-16.5	-0.000370566	-0.000187617	0.000416316	0.000716798		43.5	5.30385e-05	-2.50524e-06	0.000313584	0.000330201		43.5	0.000299118	-0.000218431	-0.000539926
-16	7.33049e-05	-0.000498479	0.000222487	0.00115		44	-0.000295073	-0.00010553	7.75859e-05	0.000110123		44	-7.55907e-05	0.000330618	-0.000108072
-15.5	-0.000246824	-4.53408e-05	-0.000480341	0.000560361		44.5	-0.000140185	0.000294446	0.000219588	-0.000108955		44.5	0.000347701	-0.000184333	-0.000474219
-15	0.000197047	-0.000101203	-0.000165169	0.000482642		45	0.000139703	-5.95788e-05	-0.00014141	0.000299967		45	0.000105993	0.000231716	-0.000175365
-14.5	-0.000123081	0.000350935	0.000276002	2.39235e-05		45.5	-0.000586409	0.000215397	-4.08217e-07	-0.000297111		45.5	0.000263285	-1.72349e-05	-0.000541511
-14	0.00032079	4.10735e-05	0.000209174	0.000327205		46	7.14795e-05	-1.36278e-05	1.55937e-05	0.000363811		46	0.000154576	0.000132814	-0.000109657
-13.5	6.61262e-07	-0.000142788	-0.000493654	0.000503486		46.5	-2.46323e-05	9.34769e-06	-0.000219404	1.87325e-05		46.5	0.000311868	0.000282863	-0.000475803
-13	0.000317533	0.00043735	0.000837517	0.000298768		47	0.000129256	0.000284323	0.000299598	0.000176654		47	0.00033616	-9.90876e-05	-0.000176949
-12.5	-0.000129596	-5.12115e-07	0.000135689	-0.000414951		47.5	-0.000344856	-0.000196701	-0.0001874	0.000333576		47.5	9.44514e-05	0.000316961	-0.000277095
-12	0.000314275	0.000197626	6.88606e-05	0.00077833		48	-0.000315968	0.000204274	0.000457602	-0.000137502		48	0.000517743	-6.49894e-05	-0.000244241
-11.5	-5.85369e-06	1.47641e-05	-0.000379968	0.000319612		48.5	0.00021592	-0.00015075	0.000221604	2.04199e-05		48.5	0.000143035	-4.79403e-05	-0.000344388
-11	0.000183018	-0.000422098	0.000824204	-1.31069e-05		49	-6.19136e-06	-0.000127775	0.000111605	5.23418e-05		49	0.000167327	0.000235109	-0.000311534
-10.5	-9.11116e-06	0.00053904	-5.62449e-06	0.000163174		49.5	-0.000481303	2.12006e-05	0.000253607	8.42636e-05		49.5	0.000324618	-1.38422e-05	-0.00014568
-10	0.00017976	0.000355178	-0.000199453	-4.15442e-05		50	5.1585e-05	-8.18239e-05	-0.000107391	-9.81451e-06		50	8.291e-05	0.000402207	-0.000245826
-9.5	0.000368631	-0.000336683	-0.000648281	0.000261737		50.5	8.04732e-05	6.71516e-05	0.000411611	0.000274107		50.5	0.000506202	0.000286256	-0.000212972
-9	4.95026e-05	0.000116455	0.00042989	0.000693018		51	0.000235361	-0.000287873	0.000679613	-0.000197971		51	0.000131493	0.000303305	-0.000446118
-8.5	0.000365374	-0.000194407	-0.000145938	0.0001063		51.5	0.00013825	-0.000138897	0.000191615	0.000211951		51.5	0.000554785	0.000320354	-0.000147264
-8	-8.07548e-05	-0.000123269	-0.000721766	0.000155581		52	-0.000461862	1.0078e-05	0.000585617	0.000243873		52	4.70768e-05	7.14033e-05	-0.00051341
-7.5	0.000362116	0.000329869	-0.000152595	-0.000176137		52.5	-5.5974e-05	-0.000218946	0.000223619	-0.000227205		52.5	0.000470369	0.000354452	-8.15566e-05
-7	-8.50123e-05	0.000147007	0.000161577	1.43946e-07		53	-0.000279086	0.000182029	0.000239621	0.000307717		53	9.56603e-05	0.000105502	-0.000447703
-6.5	0.000485859	-0.000163855	-0.000287251	0.000685425		53.5	-0.000124198	-0.000297995	0.000381623	-3.83616e-05		53.5	0.000385952	0.000255551	-1.58489e-05
-6	-8.82698e-05	0.000161283	-0.00060808	0.000352707		54	-0.000221309	-0.00015002	-0.000105375	0.00024556		54	0.000410244	-0.0002594	-0.000115995
-5.5	0.000355601	-0.000529578	-0.000674908	-0.000361012		54.5	-0.000317421	-1.04452e-06	0.000287627	-9.95179e-05		54.5	3.55354e-05	0.000156649	-0.000482141
-5	3.54727e-05	0.00030356	0.000275264	-5.67306e-05		55	0.000214467	-0.000481069	5.2629e-05	-0.000319596		55	0.000325827	-9.23021e-05	-5.02873e-05
-4.5	0.000352344	-6.30219e-06	-0.000173565	0.000373551		55.5	-0.000134645	4.49065e-05	-5.73691e-05	0.000341326		55.5	8.41189e-05	-7.5253e-05	-0.000416433
-4	0.000159215	6.48359e-05	-0.000367393	0.000168832		56	2.02434e-05	-5.81181e-05	0.000210633	-0.000255752		56	0.000507411	7.47961e-05	-0.00011758
-3.5	0.000221087	-0.000245026	-0.000561222	-0.000417887		56.5	4.91316e-05	-0.000160143	0.000100635	0.00065717		56.5	0.000265702	-0.000174155	-0.000483726
-3	0.000155958	0.000207112	0.00051595	-0.000241605		57	0.00020402	0.000113833	0.000367637	6.00914e-05		57	0.000422994	0.000241894	-5.18718e-05
-2.5	0.000217829	-0.00061175	6.71217e-05	0.000316676		57.5	0.000232908	-0.000366192	0.000383639	0.000343013		57.5	0.000447286	-0.000140057	-0.000285018
-2	0.0002797	0.000985388	-0.000253707	0.000238958		58	-0.000241204	0.000285784	0.000399641	0.000123935		58	0.000205577	0.000275992	-0.000252164
-1.5	0.000214572	-0.000215473	-0.000447535	-0.000474761		58.5	-8.63156e-05	-6.82406e-05	0.000164643	0.000155857		58.5	0.000362869	2.70416e-05	-8.63102e-05
-1	0.000276443	0.000110665	0.000502637	-0.00055248		59	-0.000183427	-0.000297265	5.46446e-05	0.000187779		59	-1.18391e-05	4.40906e-05	-0.000452456
-0.5	0.000338314	-0.000200197	5.38083e-05	-0.000122198		59.5	-0.000406539	-0.00014829	0.000322647	-0.000410299		59.5	0.000145453	0.00019414	-2.06024e-05
0	0.000273185	-0.000510059	-0.00026702	0.000181083		60	0.000251349	-0.000503314	-0.000165351	-0.000126377		60	0.000169744	-0.000187811	-0.000386749
0.5	-4.59434e-05	0.000705079	0.000174152	-0.000277636		60.5	-0.000222763	2.36613e-05	-2.33495e-05	3.15444e-05		60.5	-7.19639e-05	0.000228238	-8.78947e-05
1	0.000269928	0.000140217	0.000615323	0.000152646		61	5.81254e-05	4.66368e-05	0.000244652	0.000189466		61	0.000351328	-0.000153713	-0.000321041
1.5	-5.02009e-05	-0.000296645	4.04949e-05	-0.000561073		61.5	0.000212014	-0.000308388	-0.000117346	0.000221388		61.5	-2.33805e-05	-3.66388e-06	-0.000288187
2	0.00039367	0.000410493	-2.63335e-05	0.00101		62	0.000115902	-3.34122e-05	0.000402656	-0.00025069		62	0.000399911	-0.000119615	-0.000122333
2.5	0.000201542	0.000226631	0.000795838	4.64898e-05		62.5	0.00026979	-0.000388437	0.000418658	0.000536232		62.5	0.000158203	0.000296434	-0.000355479
3	0.000644413	0.00080677	0.00060201	0.000222771		63	-0.000204322	-0.000239461	5.66603e-05	6.51536e-05		63	0.000315495	-8.55166e-05	-5.66253e-05
3.5	0.000452284	0.000241908	-0.000227819	-0.000363947		63.5	7.65664e-05	-9.04857e-05	0.000575662	9.70755e-05		63.5	0.000339786	-6.84675e-05	-0.000289771
4	0.00102	0.0012	-4.06469e-05	0.00108		64	0.000105455	0.00018449	-3.73358e-05	0.000380997		64	0.000231078	-5.14184e-05	-0.000256918
4.5	0.000830027	0.000257184	0.000401525	0.000243615		64.5	8.34278e-06	8.14652e-05	-2.13338e-05	0.000412919		64.5	0.00052137	-0.000167369	-0.000224064
5	0.00127	0.000582322	7.96963e-05	0.000292897		65	0.000289231	-0.000147559	-0.000382332	6.6841e-05		65	0.000146662	0.00024868	-0.00045721
5.5	0.00121	0.00052646	-0.000241132	0.000215178		65.5	0.000318119	0.000253416	-0.00024033	0.000350763		65.5	0.000436953	-0.000266271	-0.000291356
6	0.00178	0.00123	0.00045504	0.000391459		66	0.000850007	2.43917e-05	-9.93279e-05	0.000382685		66	6.2245e-05	0.000149778	-0.000790502
6.5	0.00171	0.000541736	0.000388211	0.00108		66.5	0.000249896	0.000173367	-0.000208326	-8.83934e-05		66.5	0.000485537	-0.000232173	-0.000358648
7	0.00228	0.000739875	-0.000441617	0.000490022		67	0.000781784	0.000573343	-6.7324e-05	0.000698528		67	0.000509828	5.08762e-05	-0.000724794
7.5	0.00235	0.000938013	-0.000254445	0.000539303		67.5	0.000684672	-0.000284682	-0.000554322	0.00022645		67.5	0.00053412	-6.50747e-05	-0.00055894
8	0.00279	0.000882151	5.97262e-05	0.000207585		68	0.00071356	0.000116294	-0.00016032	7.37212e-06		68	0.000957412	-4.80256e-05	-0.000792087
8.5	0.00298	0.000699289	-7.10219e-06	0.000128866		68.5	0.00112	-0.000238731	-0.000396318	0.000290294		68.5	0.000715704	0.000102023	-0.000892233
9	0.00355	0.00102	-0.000963931	0.000814148		69	0.000771337	-8.97554e-05	-0.000380316	7.12158e-05		69	0.0014	-0.000146927	-0.000859379
9.5	0.00348	0.0011	-0.000522759	0.000736429		69.5	0.000926225	0.00056222	-0.000490314	0.000354138		69.5	0.00116	0.000136122	-0.00123
10	0.0038	0.00129	-0.000335587	0.00027671		70	0.00133	-4.38044e-05	-0.000726312	0.00013506		70	0.00145	2.01707e-05	-0.000926671
10.5	0.00437	0.00149	-0.000275416	7.19916e-05		70.5	0.000732001	-0.000146829	-0.00058431	0.000543981		70.5	0.00148	3.72198e-05	-0.00143
11	0.0043	0.00131	-0.00136	0.000503273		71	0.00139	0.000254147	-0.000819308	0.000198903		71	0.00164	0.000320269	-0.00126
11.5	0.00475	0.00176	-0.00105	0.000806554		71.5	0.00117	-0.000351878	-0.00106	-2.11749e-05		71.5	0.00206	7.1318e-05	-0.00176
12	0.00481	0.00132	-0.000856901	0.000219836		72	0.00157	4.80975e-05	-0.000787304	0.000513747		72	0.00195	0.000354367	-0.00159
12.5	0.00538	0.000886394	-0.000924729	0.000269117		72.5	0.0016	7.1073e-05	-0.0014	0.000168669		72.5	0.00237	-2.75838e-05	-0.00183
13	0.00531	0.000957532	-0.00175	0.000191398		73	0.00113	-0.000282951	-0.00113	0.000200591		73	0.00213	0.000521465	-0.00193
13.5	0.00601	0.00090167	-0.000676386	0.00113		73.5	0.00191	-8.976e-06	-0.00137	0.000232512		73.5	0.00255	0.000139514	-0.00163
14	0.00595	0.00161	-0.00138	0.000416961		74	0.00156	-0.000237001	-0.00148	0.000390434		74	0.00271	0.000422564	-0.00199
14.5	0.00677	0.000789946	-0.00183	0.000466242		74.5	0.00197	0.000288975	-0.00159	0.000170356		74.5	0.00274	0.000306613	-0.00183
15	0.00658	0.00112	-0.00215	7.52386e-06		75	0.0015	-6.50495e-05	-0.00195	0.000579278		75	0.00316	0.000190662	-0.00219
15.5	0.00728	0.000678223	-0.00133	0.000818805		75.5	0.0019	8.29259e-05	-0.00143	0.0002342		75.5	0.00292	0.000473711	-0.00203
16	0.00721	0.00151	-0.00177	0.000741087		76	0.00193	0.000105901	-0.00217	1.41217e-05		76	0.00347	9.17599e-05	-0.00239
16.5	0.00791	0.000947499	-0.00248	0.000155368		76.5	0.00196	-0.000122123	-0.00178	0.000550044		76.5	0.00323	0.000507809	-0.00236
17	0.00772	0.0014	-0.00178	0.000204649		77	0.00199	0.000277852	-0.00214	0.000329965		77	0.00379	0.000258858	-0.0026
17.5	0.00854	0.000708775	-0.00185	0.000253931		77.5	0.00202	-7.61721e-05	-0.0025	0.000613887		77.5	0.00368	0.000541907	-0.00283
18	0.00835	0.00192	-0.00217	0.000811212		78	0.00255	7.28034e-05	-0.00223	-0.000110191		78	0.0037	0.000425956	-0.0028
18.5	0.00917	0.00136	-0.00262	0.000224493		78.5	0.00258	-0.000408221	-0.00234	0.000173731		78.5	0.00439	0.000177005	-0.00316
19	0.00898	0.00143	-0.00179	0.000401775		79	0.00185	-0.000259246	-0.00233	0.000205653		79	0.00415	0.000726054	-0.00286
19.5	0.00968	0.0015	-0.00262	0.000196056		79.5	0.00276	-0.00011027	-0.00269	-0.000265425		79.5	0.00458	0.000344104	-0.00336
20	0.00987	0.00132	-0.00295	0.00101		80	0.00216	-0.000339295	-0.00267	0.000269497		80	0.0046	0.000494153	-0.0032
20.5	0.00993	0.00139	-0.00339	0.000421619		80.5	0.00269	6.16808e-05	-0.00253	-7.55816e-05		80.5	0.00476	0.000644202	-0.00356
21	0.0105	0.00197	-0.0027	0.0002169		81	0.00272	8.46563e-05	-0.00327	0.00045934		81	0.00518	0.000395251	-0.00326
21.5	0.01069	0.00128	-0.00327	-0.000114818		81.5	0.00237	-0.000521368	-0.003	0.000113262		81.5	0.00494	0.0008113	-0.00376
22	0.01126	0.00122	-0.00347	0.000697463		82	0.00291	0.000130607	-0.00298	0.000271184		82	0.00563	0.000296349	-0.0036
22.5	0.01119	0.000911156	-0.00328	0.000237744		82.5	0.00268	-0.000350417	-0.00335	0.000177106		82.5	0.00539	0.000712398	-0.00396
23	0.01176	0.00162	-0.00297	-9.39744e-05		83	0.00271	0.000176558	-0.00308	0.000209028		83	0.00594	0.000596447	-0.00393
23.5	0.01183	0.00105	-0.0038	0.000336307		83.5	0.00287	-5.24663e-05	-0.00357	0.000240949		83.5	0.00583	0.000613496	-0.0039
24	0.01252	0.00125	-0.00412	-0.000122412		84	0.0034	-0.000406491	-0.00342	-0.000230129		84	0.00612	0.000497545	-0.0044
24.5	0.01233	0.000941709	-0.00368	0.00094387		84.5	0.00318	-6.51528e-06	-0.00379	5.37932e-05		84.5	0.00642	0.000381595	-0.0041
25	0.01303	0.00178	-0.00349	-2.38489e-05		85	0.00333	-0.00048654	-0.00415	8.5715e-05		85	0.00631	0.000531644	-0.0046
25.5	0.01296	0.00134	-0.00457	-0.000229568		85.5	0.00311	0.000165436	-0.00363	0.000368637		85.5	0.00686	0.000282693	-0.00443
26	0.01366	0.00141	-0.00439	-0.000307286		86	0.00301	0.000188411	-0.00412	2.35587e-05		86	0.00675	0.000432742	-0.0048
26.5	0.01334	0.00161	-0.0042	0.000377995		86.5	0.00367	-0.000166613	-0.00385	5.54806e-05		86.5	0.00731	0.000449791	-0.00476
27	0.01417	0.00181	-0.00426	-0.000335723		87	0.00357	-1.76378e-05	-0.00421	0.000464402		87	0.0072	0.00033384	-0.005
27.5	0.0141	0.00213	-0.00548	-0.000413442		87.5	0.00373	-0.000371662	-0.00432	-0.000383676		87.5	0.00749	0.000749889	-0.0051
28	0.0148	0.00207	-0.0044	-0.000618161		88	0.00376	0.000154313	-0.0043	0.000277246		88	0.00778	0.000500938	-0.00506
28.5	0.01461	0.0024	-0.00497	0.000193121		88.5	0.00303	-7.47114e-05	-0.00479	-6.8832e-05		88.5	0.00781	0.000517987	-0.00543
29	0.01543	0.00184	-0.00517	-0.000519598		89	0.00344	0.000200264	-0.00465	-0.00016291		89	0.0081	0.000801036	-0.00527
29.5	0.01524	0.00229	-0.006	-0.000343317		89.5	0.00359	-0.00015376	-0.00501	0.000121012		89.5	0.00825	0.000419085	-0.00563
30	0.01555	0.00172	-0.00492	-0.000930035		90	0.00375	-0.000634785	-0.00487	-0.000602066		90	0.00841	0.000702135	-0.00547
30.5	0.01612	0.00141	-0.00537	0.000263246		90.5	0.0039	-0.000107809	-0.0046	-6.71446e-05		90.5	0.00883	0.000320184	-0.00596
31	0.01619	0.00136	-0.00556	-0.000322473		91	0.0033	4.01661e-05	-0.00496	-0.000790223		91	0.00859	0.000337233	-0.00567
31.5	0.01676	0.00181	-0.00627	-0.000146191		91.5	0.00409	-6.18585e-05	-0.0052	-0.000128301		91.5	0.00928	0.000487282	-0.00603
32	0.01669	0.0015	-0.00544	-0.00111		92	0.00399	-3.8883e-05	-0.00506	-0.000474379		92	0.00917	0.000371331	-0.006
32.5	0.01739	0.00132	-0.00627	-0.000810628		92.5	0.00452	-0.000267907	-0.00554	-0.000190457		92.5	0.00973	0.00065438	-0.0061
33	0.01732	0.00101	-0.00659	-0.000252347		93	0.00417	7.068e-06	-0.00528	-0.000410535		93	0.00975	0.000405429	-0.00647
33.5	0.01802	0.00171	-0.00641	-0.000585066		93.5	0.00445	3.00435e-05	-0.00576	-0.000755613		93.5	0.00991	0.000688478	-0.00617
34	0.01783	0.00128	-0.00609	-0.000916784		94	0.00461	0.000178019	-0.00575	-0.000346692		94	0.0102	0.000572527	-0.0068
34.5	0.01853	0.00109	-0.00692	-0.000486503		94.5	0.00426	0.000200994	-0.00611	-0.00081777		94.5	0.01023	0.000589576	-0.0065
35	0.01833	0.00104	-0.00737	-0.000437222		95	0.00454	-0.00040503	-0.00634	-0.000282848		95	0.01065	0.000739625	-0.007
35.5	0.01903	0.00162	-0.00744	-0.00102		95.5	0.00444	0.000246945	-0.00582	-0.000879926		95.5	0.01054	0.000357675	-0.00683
36	0.01897	0.00131	-0.00687	-0.000465659		96	0.00485	-0.000233079	-0.00619	-0.000219004		96	0.01096	0.000507724	-0.00707
36.5	0.01966	0.000996024	-0.00732	-0.00105		96.5	0.00425	0.000167896	-0.00592	-0.000313082		96.5	0.01099	0.000258773	-0.00717
37	0.01947	0.000940162	-0.00802	0.000141904		97	0.00453	-6.11281e-05	-0.00615	-0.000532161		97	0.01115	0.000275822	-0.00713
37.5	0.02004	0.00165	-0.00732	-0.000826815		97.5	0.00481	-0.000164153	-0.00626	-0.000375239		97.5	0.01183	0.000425871	-0.0075
38	0.01998	0.00108	-0.00764	-0.000522534		98	0.00484	-1.51771e-05	-0.00637	-0.000594317		98	0.01186	0.00044292	-0.00733
38.5	0.02055	0.000772576	-0.00822	-0.00136		98.5	0.00512	-0.000495202	-0.00686	-0.000311395		98.5	0.01215	0.000725969	-0.00783
39	0.02048	0.000843714	-0.00829	-0.000550971		99	0.00502	-9.52262e-05	-0.00647	-0.000656473		99	0.01231	0.000344018	-0.00753
39.5	0.0208	0.00155	-0.00772	-0.00101		99.5	0.00518	5.37493e-05	-0.00708	-0.000624551		99.5	0.01233	0.000494067	-0.00803
40	0.02111	0.00111	-0.00817	-0.000834408		100	0.00546	-0.000426275	-0.00719	-0.000466629		100	0.01275	0.000644116	-0.00773
40.5	0.0213	0.000929129	-0.00874	-0.00129		100.5	0.00486	-0.0001523	-0.00692	-0.000812708		100.5	0.01265	0.000395166	-0.00823
41	0.02187	0.00113	-0.00906	-0.000862845		101	0.00552	-0.000884324	-0.00741	-0.000402786		101	0.01307	0.000678215	-0.0078
41.5	0.02194	0.00171	-0.00849	-0.000813564		101.5	0.00517	-0.000357349	-0.00739	-0.000748864		101.5	0.01283	0.000296264	-0.00857
42	0.02238	0.00102	-0.00882	-0.000891283		102	0.00557	4.26268e-05	-0.0075	-0.000212942		102	0.01312	0.000579313	-0.00827
42.5	0.02231	0.00134	-0.00939	-0.00148		102.5	0.0051	-0.000815398	-0.00774	-0.00068502		102.5	0.01327	0.000463362	-0.00837
43	0.02288	0.000776819	-0.00908	-0.00156		103	0.0055	-0.000288422	-0.0076	-0.000275098		103	0.0133	0.000347411	-0.00874
43.5	0.02295	0.00212	-0.00889	-0.000997439		103.5	0.00553	-0.000265447	-0.00796	-0.000495176		103.5	0.01386	0.00063046	-0.00857
44	0.02352	0.00117	-0.00972	-0.00146		104	0.00544	-0.000117471	-0.00757	-0.000715255		104	0.01388	0.000248509	-0.00907
44.5	0.02345	0.00137	-0.00966	-0.00166		104.5	0.00584	-9.44958e-05	-0.00818	-0.000431333		104.5	0.01444	0.000797558	-0.0089
45	0.02402	0.00132	-0.00947	-0.00187		105	0.00524	-7.15203e-05	-0.00804	-0.000777411		105	0.01433	0.000282607	-0.00927
45.5	0.02396	0.00139	-0.00954	-0.00118		105.5	0.0059	-0.000173545	-0.00827	-0.000619489		105.5	0.01488	0.000432656	-0.00937
46	0.02465	0.000821648	-0.01088	-0.00164		106	0.00568	-0.000402569	-0.00838	-0.000838567		106	0.01478	0.000449706	-0.00947
46.5	0.02446	0.00178	-0.01005	-0.00185		106.5	0.00596	-0.000379594	-0.00837	-0.00106		106.5	0.01507	0.000200755	-0.00957
47	0.02503	0.000963924	-0.01025	-0.00167		107	0.00574	-0.000482618	-0.00873	-0.000900724		107	0.01549	0.000616804	-0.00967
47.5	0.02497	0.00142	-0.01032	-0.00137		107.5	0.00589	-0.000333643	-0.00834	-0.00112		107.5	0.01525	0.000101853	-0.0099
48	0.02566	0.00111	-0.0114	-0.00195		108	0.0063	-0.000814667	-0.00895	-0.00058588		108	0.01594	0.000118902	-0.00974
48.5	0.02547	0.00194	-0.01032	-0.00203		108.5	0.00607	-0.000791692	-0.00881	-0.000678958		108.5	0.01596	0.000401951	-0.0101
49	0.02604	0.000867477	-0.0109	-0.00147		109	0.00585	-0.000138716	-0.00917	-0.000773036		109	0.01612	0.000153	-0.0098
49.5	0.0261	0.00208	-0.01122	-0.00155		109.5	0.00626	-0.000619741	-0.00915	-0.000741114		109.5	0.01654	0.000569049	-0.01044
50	0.02655	0.00152	-0.01154	-0.00226		110	0.00604	-0.000218765	-0.00901	-0.000458192		110	0.01643	5.40984e-05	-0.01
50.5	0.02661	0.00133	-0.01059	-0.00234		110.5	0.00657	5.62101e-05	-0.00937	-0.000677271		110.5	0.01699	0.000337147	-0.0105
51	0.02705	0.00128	-0.01155	-0.00242		111	0.00597	-0.000676814	-0.0091	-0.000771349		111	0.01661	0.000354197	-0.0102
51.5	0.02711	0.0016	-0.01187	-0.00161		111.5	0.00662	-0.000149839	-0.00959	-0.000739427		111.5	0.0173	0.000238246	-0.01057
52	0.02743	0.00129	-0.01219	-0.00207		112	0.00653	-0.000630863	-0.00958	-0.000959505		112	0.0172	0.000521295	-0.01054
52.5	0.02762	0.00137	-0.01149	-0.00278		112.5	0.00668	-0.000355888	-0.00969	-0.000801583		112.5	0.01735	6.34383e-06	-0.01064
53	0.02781	0.00144	-0.0122	-0.00159		113	0.00671	-0.000458913	-0.00979	-0.00102		113	0.01778	0.000422393	-0.011
53.5	0.02812	0.00138	-0.01264	-0.0023		113.5	0.00624	-0.000561937	-0.00978	-0.000485739		113.5	0.01767	0.000439442	-0.01084
54	0.02819	0.00107	-0.01284	-0.00225		114	0.00677	-0.000286962	-0.01014	-0.00108		114	0.01836	0.000323491	-0.01134
54.5	0.02838	0.00165	-0.01227	-0.00271		114.5	0.00642	-0.000515986	-0.00975	-0.000421896		114.5	0.01798	0.00034054	-0.01117
55	0.02806	0.000704134	-0.01272	-0.00177		115	0.00658	-0.000367011	-0.01036	-0.000893974		115	0.01867	9.15893e-05	-0.0114
55.5	0.0285	0.00217	-0.01342	-0.00261		115.5	0.00698	-0.000218035	-0.01034	-0.000987052		115.5	0.01856	0.000374638	-0.0115
56	0.02831	0.00097341	-0.01272	-0.00256		116	0.00626	5.69404e-05	-0.01033	-0.00057813		116	0.01885	-7.31251e-06	-0.01174
56.5	0.02875	0.00143	-0.01292	-0.0029		116.5	0.00691	-0.000549084	-0.01069	-0.00143		116.5	0.01914	0.000408737	-0.01184
57	0.02881	0.00112	-0.01349	-0.00196		117	0.00669	-0.000401109	-0.01042	-0.000514287		117	0.01903	0.000159786	-0.01194
57.5	0.02951	0.00106	-0.01382	-0.0028		117.5	0.00722	-0.000378133	-0.01091	-0.00124		117.5	0.01959	0.000176835	-0.01191
58	0.02957	0.00189	-0.01312	-0.003		118	0.00725	-0.000732158	-0.01052	-0.000702443		118	0.01975	0.000326884	-0.01201
58.5	0.03027	0.00133	-0.0137	-0.00308		118.5	0.00665	-8.01822e-05	-0.01088	-0.00117		118.5	0.01977	-5.5067e-05	-0.01224
59	0.03008	0.000892239	-0.01402	-0.00252		119	0.00731	-0.000686207	-0.01111	-0.000889599		119	0.0202	9.49821e-05	-0.01207
59.5	0.03077	0.00134	-0.01434	-0.00285		119.5	0.00734	-0.000663231	-0.01122	-0.000983677		119.5	0.02009	0.000245031	-0.01244
60	0.03071	0.00129	-0.0144	-0.00331		120	0.00712	-0.000263256	-0.01158	-0.0012		120	0.02064	-0.00013692	-0.01214
60.5	0.03128	0.00111	-0.01422	-0.00314		120.5	0.00727	-0.00074328	-0.01107	-0.000793834		120.5	0.02053	0.000279129	-0.01264
61	0.03121	0.00168	-0.01492	-0.00283		121	0.00717	-0.000217305	-0.01168	-0.00127		121	0.02069	-0.000235822	-0.01234
61.5	0.03166	0.00112	-0.01448	-0.00291		121.5	0.00783	-0.000445329	-0.01166	-0.00085599		121.5	0.02111	-8.57725e-05	-0.01284
62	0.03172	0.000810068	-0.01442	-0.00362		122	0.00736	-0.000674354	-0.01177	-0.00108		122	0.02087	-6.87234e-05	-0.01254
62.5	0.03216	0.00126	-0.01525	-0.00307		122.5	0.00751	-0.000525378	-0.01201	-0.00104		122.5	0.02143	-0.000184674	-0.01291
63	0.0321	0.000444344	-0.01582	-0.00289		123	0.00754	-0.000754403	-0.01174	-0.000886224		123	0.02119	0.000231375	-0.01314
63.5	0.03254	0.00217	-0.01576	-0.00297		123.5	0.00732	-0.000227427	-0.01235	-0.00111		123.5	0.02161	-0.000150576	-0.01297
64	0.03286	0.00084062	-0.01532	-0.00343		124	0.00798	-0.000708452	-0.01196	-0.000822381		124	0.0219	0.000265473	-0.01347
64.5	0.03305	0.00104	-0.01564	-0.00312		124.5	0.00763	-0.000307476	-0.0122	-0.00129		124.5	0.02179	1.65221e-05	-0.01317
65	0.03323	0.000600896	-0.01622	-0.00295		125	0.00803	-0.000913501	-0.01243	-0.00114		125	0.02235	0.000166571	-0.01367
65.5	0.03342	0.00144	-0.01667	-0.00303		125.5	0.00769	-0.000639525	-0.01229	-0.00123		125.5	0.02224	0.00018362	-0.01337
66	0.03374	0.000616173	-0.01597	-0.00387		126	0.00784	-0.00061655	-0.0129	-0.00145		126	0.0228	-6.53306e-05	-0.01387
66.5	0.0338	0.000942311	-0.01629	-0.00318		126.5	0.00825	-0.000844574	-0.01251	-0.000914771		126.5	0.02295	0.000217718	-0.01371
67	0.03424	0.000377449	-0.01674	-0.00339		127	0.00765	-0.000318599	-0.01287	-0.00164		127	0.02271	-0.000297232	-0.01394
67.5	0.03405	0.00172	-0.01617	-0.00346		127.5	0.00793	-0.00105	-0.01285	-0.00123		127.5	0.023	-1.41833e-05	-0.01404
68	0.03462	0.000773725	-0.01611	-0.00405		128	0.00808	-0.000398648	-0.01322	-0.00145		128	0.02329	0.000135866	-0.01401
68.5	0.03443	0.000971863	-0.0172	-0.00298		128.5	0.00786	-0.000878672	-0.01333	-0.00116		128.5	0.02332	-0.000113085	-0.01438
69	0.03487	0.000281001	-0.01675	-0.00344		129	0.00839	-0.000729697	-0.01306	-0.00126		129	0.02374	0.000169964	-0.01408
69.5	0.03481	0.00137	-0.01695	-0.00416		129.5	0.00804	-0.000329721	-0.01329	-0.00123		129.5	0.02377	-7.89869e-05	-0.01458
70	0.03525	0.000677278	-0.01714	-0.00385		130	0.0082	-0.00106	-0.01328	-0.00132		130	0.02419	-6.19378e-05	-0.01428
70.5	0.03531	0.000748416	-0.01784	-0.00342		130.5	0.00835	-0.00053577	-0.01326	-0.00129		130.5	0.02435	0.000221111	-0.01478
71	0.03563	0.000565554	-0.01715	-0.00363		131	0.00851	-0.000637795	-0.01388	-0.001		131	0.0245	-0.00016084	-0.01461
71.5	0.03569	0.00102	-0.0176	-0.00459		131.5	0.00854	-0.000992819	-0.01361	-0.00135		131.5	0.02479	0.000122209	-0.01498
72	0.03588	0.00057983	-0.01779	-0.00429		132	0.00794	-0.000466844	-0.01384	-0.00107		132	0.02455	-0.000259741	-0.01481
72.5	0.03607	0.00141	-0.01862	-0.00399		132.5	0.00847	-0.000694869	-0.01383	-0.00166		132.5	0.02511	-0.000109692	-0.01491
73	0.03626	0.000722106	-0.01729	-0.00419		133	0.00824	-0.000420893	-0.01419	-0.00113		133	0.02487	-9.26433e-05	-0.01528
73.5	0.03632	0.00105	-0.01812	-0.00465		133.5	0.00852	-0.000900918	-0.01405	-0.00173		133.5	0.02529	-0.000208594	-0.01498
74	0.03651	0.000483383	-0.01844	-0.00397		134	0.00843	-0.000625942	-0.01428	-0.00106		134	0.02531	-5.85451e-05	-0.01548
74.5	0.03683	0.000681521	-0.01876	-0.00392		134.5	0.00833	-0.000854967	-0.01477	-0.00154		134.5	0.02534	-0.000307496	-0.01518
75	0.03701	0.00101	-0.01807	-0.00463		135	0.00874	-0.00108	-0.01412	-0.001		135	0.02576	0.000108553	-0.01541
75.5	0.0372	0.000950797	-0.01877	-0.00433		135.5	0.00851	-0.000557016	-0.01461	-0.00122		135.5	0.02579	-0.000406398	-0.01538
76	0.03739	0.000513935	-0.01909	-0.0039		136	0.0088	-0.00104	-0.01434	-0.00182		136	0.02621	9.6513e-06	-0.01588
76.5	0.03784	0.000458073	-0.01941	-0.0041		136.5	0.00882	-0.000763065	-0.01471	-0.00128		136.5	0.02637	-0.0002393	-0.01571
77	0.0379	0.000783211	-0.0191	-0.00507		137	0.00898	-0.00124	-0.01444	-0.00175		137	0.02626	-0.000222251	-0.01608
77.5	0.03834	0.00060035	-0.01929	-0.00477		137.5	0.00926	-0.000969114	-0.01493	-0.00122		137.5	0.02681	6.07986e-05	-0.01605
78	0.03828	0.000671488	-0.01999	-0.00434		138	0.00853	-0.000568138	-0.01504	-0.00169		138	0.02657	-0.000321152	-0.01615
78.5	0.0391	0.000360626	-0.01993	-0.00467		138.5	0.00919	-0.000923163	-0.01515	-0.00103		138.5	0.02686	-0.000171103	-0.01625
79	0.03891	0.000304764	-0.01936	-0.005		139	0.00884	-0.000774187	-0.01551	-0.0015		139	0.02715	-0.000154054	-0.01608
79.5	0.03948	0.00101	-0.01994	-0.00495		139.5	0.00925	-0.000877212	-0.01499	-0.00109		139.5	0.02704	-0.000270005	-0.01658
80	0.03941	0.00032004	-0.02039	-0.00401		140	0.00903	-0.00123	-0.0156	-0.00131		140	0.02773	-0.000119956	-0.01641
80.5	0.03986	0.000264178	-0.02007	-0.00498		140.5	0.00906	-0.000579261	-0.01558	-0.00090196		140.5	0.02749	-0.000368907	-0.01678
81	0.03966	8.13163e-05	-0.01989	-0.00506		141	0.00946	-0.000808285	-0.01557	-0.00137		141	0.02805	-8.58577e-05	-0.01661
81.5	0.04023	0.000914454	-0.02084	-0.00552		141.5	0.00899	-0.00078531	-0.01593	-0.00122		141.5	0.02781	-0.000467809	-0.01698
82	0.04004	0.000350593	-0.02066	-0.00496		142	0.00927	-0.000887334	-0.01566	-0.00131		142	0.0281	-0.00018476	-0.01681
82.5	0.04061	0.000166731	-0.02021	-0.00478		142.5	0.00917	-0.000990359	-0.01602	-0.0014		142.5	0.02852	-0.00016771	-0.01705
83	0.04042	0.000110869	-0.02066	-0.00588		143	0.00933	-0.000716383	-0.01588	-0.00125		143	0.02828	-0.000416661	-0.01728
83.5	0.04099	0.000818007	-0.02137	-0.00443		143.5	0.00961	-0.000818408	-0.0165	-0.00121		143.5	0.02883	-0.000133612	-0.01711
84	0.0408	0.000508145	-0.02169	-0.00514		144	0.00938	-0.000418432	-0.01598	-0.00131		144	0.02873	-0.000515563	-0.01748
84.5	0.04124	-5.67168e-05	-0.02112	-0.00535		144.5	0.00979	-0.00128	-0.01634	-0.00178		144.5	0.02915	-9.95141e-05	-0.01718
85	0.04118	0.000395421	-0.02157	-0.00568		145	0.00894	-0.001	-0.01632	-0.00137		145	0.02931	-0.000481465	-0.01755
85.5	0.04162	0.000593559	-0.02163	-0.00525		145.5	0.0096	-0.0011	-0.01631	-0.00171		145.5	0.0292	-0.000331416	-0.01738
86	0.04155	0.000410698	-0.02145	-0.0052		146	0.00963	-0.00121	-0.01654	-0.00131		146	0.02975	-0.000314367	-0.01775
86.5	0.042	0.000481836	-0.02151	-0.00591		146.5	0.00953	-0.000680555	-0.01653	-0.00152		146.5	0.02978	-0.000430318	-0.01745
87	0.04193	0.000806974	-0.02247	-0.00548		147	0.00981	-0.00116	-0.01701	-0.00212		147	0.02967	-0.000147269	-0.01795
87.5	0.04237	0.00101	-0.02139	-0.00543		147.5	0.00921	-0.000760604	-0.01649	-0.00146		147.5	0.03009	-0.00052922	-0.01778
88	0.04231	0.00082225	-0.02235	-0.00551		148	0.00961	-0.000737628	-0.01698	-0.00193		148	0.02998	-0.00037917	-0.01802
88.5	0.04212	0.000385388	-0.02267	-0.00648		148.5	0.01002	-0.000714653	-0.01684	-0.00127		148.5	0.03041	-0.000362121	-0.01785
89	0.04218	0.00122	-0.02274	-0.00579		149	0.0098	-0.000565677	-0.01695	-0.00174		149	0.03056	-0.000478072	-0.01795
89.5	0.04224	0.000908664	-0.02242	-0.00562		149.5	0.00983	-0.000920702	-0.01744	-0.00121		149.5	0.03046	-0.000195023	-0.01818
90	0.04281	0.000598803	-0.02313	-0.00557		150	0.0096	-0.000897726	-0.01717	-0.00168		150	0.03101	-0.000443974	-0.01815
90.5	0.04211	0.000923941	-0.02319	-0.00628		150.5	0.01001	-0.00113	-0.01753	-0.00102		150.5	0.03077	-0.000293925	-0.01838
						151	0.01004	-0.00135	-0.01714	-0.00162		151	0.03106	-0.000675876	-0.01822
						151.5	0.00969	-0.0009548	-0.01762	-0.00121		151.5	0.03135	-0.000525827	-0.01858
						152	0.01022	-0.000931825	-0.01761	-0.0018		152	0.03124	-0.000375778	-0.01868
						152.5	0.01	-0.000656849	-0.01759	-0.00127		152.5	0.03167	-0.000624729	-0.01892
						153	0.01053	-0.00126	-0.0182	-0.00174		153	0.03156	-0.000341679	-0.01875
						153.5	0.01006	-0.000736898	-0.01794	-0.00158		153.5	0.03172	-0.00072363	-0.01912
						154	0.01034	-0.00109	-0.0183	-0.00168		154	0.03214	-0.000307581	-0.01895
						154.5	0.01049	-0.000942947	-0.0179	-0.00177		154.5	0.0319	-0.000689532	-0.01905
						155	0.01002	-0.000541972	-0.01801	-0.00161		155	0.03245	-0.000539483	-0.01915
						155.5	0.01068	-0.000896996	-0.01825	-0.00183		155.5	0.03234	-0.000256434	-0.01912
						156	0.01071	-0.000622021	-0.01811	-0.00155		156	0.0325	-0.000638385	-0.01949
						156.5	0.01073	-0.00148	-0.01872	-0.00177		156.5	0.03279	-0.000222336	-0.01932
						157	0.01026	-0.00095407	-0.01833	-0.00161		157	0.03282	-0.000471287	-0.01969
						157.5	0.01029	-0.000931094	-0.01869	-0.00158		157.5	0.03284	-0.000720238	-0.01952
						158	0.01082	-0.00103	-0.0183	-0.00167		158	0.03326	-0.000437189	-0.02002
						158.5	0.01047	-0.000633143	-0.01853	-0.00126		158.5	0.03302	-0.000819139	-0.01959
						159	0.01063	-0.00111	-0.01914	-0.00186		159	0.03345	-0.00053609	-0.02009
						159.5	0.01066	-0.00122	-0.01875	-0.00158		159.5	0.03374	-0.000785041	-0.01979
						160	0.01043	-0.00107	-0.01911	-0.0018		160	0.03363	-0.000767992	-0.02015
						160.5	0.01097	-0.00117	-0.0191	-0.00151		160.5	0.03418	-0.000617943	-0.01999
						161	0.01062	-0.000644266	-0.01908	-0.00211		161	0.03394	-0.001	-0.02035
						161.5	0.01077	-0.00138	-0.01944	-0.00157		161.5	0.03423	-0.000450845	-0.02059
						162	0.0108	-0.000849315	-0.01917	-0.00179		162	0.03439	-0.000832796	-0.02016
						162.5	0.01096	-0.00108	-0.01991	-0.00151		162.5	0.03428	-0.000549747	-0.02065
						163	0.01111	-0.000929364	-0.01977	-0.00135		163	0.0347	-0.000665698	-0.02036
						163.5	0.01064	-0.000655388	-0.01988	-0.00145		163.5	0.0346	-0.000515648	-0.02085
						164	0.01092	-0.00139	-0.01999	-0.00167		164	0.03475	-0.000498599	-0.02069
						164.5	0.01057	-0.000986437	-0.01985	-0.00176		164.5	0.03531	-0.00088155	-0.02079
						165	0.01085	-0.00122	-0.02008	-0.0016		165	0.03507	-0.000464501	-0.02089
						165.5	0.01088	-0.00119	-0.01994	-0.00195		165.5	0.03549	-0.000847452	-0.02086
						166	0.01091	-0.000791511	-0.02043	-0.00129		166	0.03565	-0.000563403	-0.02096
						166.5	0.01093	-0.00115	-0.02016	-0.00176		166.5	0.03527	-0.000546354	-0.02092
						167	0.01109	-0.00099756	-0.0204	-0.00173		167	0.0357	-0.000796305	-0.02129
						167.5	0.01112	-0.00135	-0.02026	-0.00169		167.5	0.03572	-0.000512256	-0.02099
						168	0.01127	-0.000951609	-0.02024	-0.00179		168	0.03574	-0.000895207	-0.02149
						168.5	0.01105	-0.00105	-0.02085	-0.00163		168.5	0.0363	-0.000611158	-0.02119
						169	0.01133	-0.00128	-0.02059	-0.00223		169	0.03619	-0.000728108	-0.02169
						169.5	0.01098	-0.00113	-0.0212	-0.00157		169.5	0.03662	-0.000577059	-0.02139
						170	0.01139	-0.00111	-0.02106	-0.00229		170	0.03677	-0.00069401	-0.02189
						170.5	0.01104	-0.00134	-0.02104	-0.0015		170.5	0.03653	-0.000942961	-0.02159
						171	0.01082	-0.000939756	-0.02128	-0.00185		171	0.03695	-0.000659912	-0.02196
						171.5	0.0116	-0.00129	-0.02088	-0.00169		171.5	0.03685	-0.00104	-0.02193
						172	0.01138	-0.000641805	-0.02125	-0.00191		172	0.037	-0.000625814	-0.02189
						172.5	0.01191	-0.00099683	-0.02123	-0.002		172.5	0.03729	-0.00101	-0.02213
						173	0.01169	-0.0011	-0.02134	-0.00147		173	0.03718	-0.000857716	-0.02209
						173.5	0.01172	-0.000950879	-0.0212	-0.00219		173.5	0.03774	-0.000840667	-0.02246
						174	0.01187	-0.00143	-0.02143	-0.00153		174	0.03763	-0.000956617	-0.02216
						174.5	0.0114	-0.00103	-0.02154	-0.00225		174.5	0.03779	-0.000673568	-0.02266
						175	0.0118	-0.000755952	-0.0214	-0.00159		175	0.03808	-0.00119	-0.02236
						175.5	0.01158	-0.00124	-0.02189	-0.00144		175.5	0.03771	-0.00077247	-0.02259
						176	0.01186	-0.000710001	-0.02162	-0.00216		176	0.03786	-0.00115	-0.02256
						176.5	0.01202	-0.00106	-0.02223	-0.00162		176.5	0.03829	-0.00114	-0.02266
						177	0.01142	-0.00079005	-0.02197	-0.00222		177	0.03804	-0.000721323	-0.02276
						177.5	0.01207	-0.000767075	-0.02208	-0.00169		177.5	0.0386	-0.0011	-0.02273
						178	0.01185	-0.000492099	-0.02244	-0.00228		178	0.03849	-0.000820225	-0.02296
						178.5	0.01188	-0.000846124	-0.02192	-0.002		178.5	0.03878	-0.00107	-0.0228
						179	0.01178	-0.00108	-0.02253	-0.00209		179	0.03907	-0.00105	-0.02316
						179.5	0.01156	-0.0013	-0.02252	-0.00194		179.5	0.0387	-0.000902077	-0.02286
						180	0.01222	-0.000903197	-0.02263	-0.00165		180	0.03925	-0.00115	-0.02336
						180.5	0.012	-0.00126	-0.02273	-0.00212		180.5	0.03915	-0.000867979	-0.02306
						181	0.01202	-0.000606246	-0.02259	-0.00159		181	0.0393	-0.00125	-0.02356
						181.5	0.01218	-0.00109	-0.02308	-0.00206		181.5	0.03959	-0.000833881	-0.02366
						182	0.01208	-0.000811295	-0.02256	-0.00165		182	0.03935	-0.00108	-0.02363
						182.5	0.01249	-0.00091432	-0.02305	-0.00212		182.5	0.03977	-0.00107	-0.02386
						183	0.01189	-0.00102	-0.02291	-0.00184		183	0.03967	-0.000915734	-0.02356
						183.5	0.01229	-0.000491369	-0.02327	-0.00193		183.5	0.03969	-0.00116	-0.02393
						184	0.01207	-0.00122	-0.02338	-0.0019		184	0.04011	-0.000748636	-0.02363
						184.5	0.01223	-0.0012	-0.02324	-0.00174		184.5	0.03987	-0.00126	-0.024
						185	0.01238	-0.00118	-0.02372	-0.00221		185	0.0403	-0.000847537	-0.0237
						185.5	0.01178	-0.00115	-0.0232	-0.00155		185.5	0.04045	-0.000963488	-0.02406
						186	0.01269	-0.000753491	-0.02369	-0.00215		186	0.04021	-0.00121	-0.0239
						186.5	0.01272	-0.00111	-0.02355	-0.00187		186.5	0.0405	-0.0012	-0.024
						187	0.01224	-0.00083354	-0.02391	-0.00196		187	0.04079	-0.00118	-0.0241
						187.5	0.0124	-0.000810565	-0.02402	-0.0018		187.5	0.04068	-0.00116	-0.02407
						188	0.01218	-0.00104	-0.02363	-0.00215		188	0.04097	-0.00101	-0.02443
						188.5	0.01258	-0.000638614	-0.02411	-0.00174		188.5	0.04073	-0.00139	-0.02413
						189	0.01274	-0.000993638	-0.02397	-0.00196		189	0.04102	-0.000977145	-0.02463
						189.5	0.01226	-0.000718663	-0.02421	-0.00193		189.5	0.04118	-0.00109	-0.0242
						190	0.01292	-0.0012	-0.02457	-0.00164		190	0.04094	-0.00108	-0.02483
						190.5	0.01245	-0.00118	-0.02418	-0.00211		190.5	0.04163	-0.00119	-0.02453
						191	0.01298	-0.000901737	-0.02466	-0.0012		191	0.04125	-0.00131	-0.0249
						191.5	0.01238	-0.00113	-0.0244	-0.00205		191.5	0.04168	-0.00116	-0.02513
						192	0.01253	-0.000980786	-0.02476	-0.00189		192	0.04183	-0.00127	-0.02484
						192.5	0.01294	-0.00108	-0.02449	-0.00186		192.5	0.04159	-0.00126	-0.0252
						193	0.01259	-0.000934835	-0.02498	-0.00208		193	0.04201	-0.00111	-0.02477
						193.5	0.013	-0.00104	-0.02496	-0.00154		193.5	0.04191	-0.00149	-0.02527
						194	0.01227	-0.00101	-0.02457	-0.00202		194	0.04206	-0.00107	-0.02497
						194.5	0.01293	-0.000991908	-0.02518	-0.00148		194.5	0.04235	-0.00132	-0.02547
						195	0.01309	-0.00147	-0.02491	-0.00195		195	0.04211	-0.00104	-0.02517
						195.5	0.01274	-0.000819957	-0.02553	-0.00154		195.5	0.04253	-0.00115	-0.02554
						196	0.01302	-0.0013	-0.02513	-0.00176		196	0.04269	-0.0014	-0.02537
						196.5	0.01292	-0.00103	-0.02537	-0.00198		196.5	0.04245	-0.00139	-0.02547
						197	0.01282	-0.000751031	-0.02535	-0.00145		197	0.04274	-0.0011	-0.0257
						197.5	0.01336	-0.00136	-0.02521	-0.00204		197.5	0.0429	-0.00135	-0.02567
						198	0.01301	-0.00108	-0.0257	-0.00126		198	0.04266	-0.00107	-0.0259
						198.5	0.01278	-0.00106	-0.02568	-0.00198		198.5	0.04321	-0.00119	-0.02561
						199	0.01319	-0.00129	-0.02567	-0.00145		199	0.0431	-0.0013	-0.02597
						199.5	0.01297	-0.000888153	-0.0259	-0.00167		199.5	0.04313	-0.00115	-0.02567
						200	0.0135	-0.000991178	-0.02576	-0.00188		200	0.04368	-0.00153	-0.02617
						200.5	0.0129	-0.000968202	-0.02637	-0.00135		200.5	0.04344	-0.00138	-0.02587
						201	0.01343	-0.00107	-0.02585	-0.0017		201	0.04373	-0.00137	-0.02611
						201.5	0.01346	-0.000922251	-0.02622	-0.00154		201.5	0.04389	-0.00148	-0.02621
						202	0.01324	-0.00103	-0.02595	-0.00201		202	0.04365	-0.0012	-0.02604
						202.5	0.01314	-0.00113	-0.02606	-0.00147		202.5	0.04394	-0.00131	-0.02641
						203	0.01317	-0.000727325	-0.02617	-0.0022		203	0.0437	-0.00116	-0.02624
						203.5	0.01332	-0.00133	-0.02628	-0.00166		203.5	0.04385	-0.00115	-0.02661
						204	0.01335	-0.00106	-0.02651	-0.00213		204	0.04428	-0.0014	-0.02631
						204.5	0.01313	-0.00129	-0.0265	-0.00223		204.5	0.04417	-0.00111	-0.02667
						205	0.01328	-0.00126	-0.02686	-0.00157		205	0.04459	-0.0015	-0.02638
						205.5	0.01331	-0.000738447	-0.02672	-0.00241		205.5	0.04462	-0.00135	-0.02687
						206	0.01334	-0.00134	-0.02733	-0.00201		206	0.04424	-0.0012	-0.02658
						206.5	0.01388	-0.00107	-0.02719	-0.00197		206.5	0.04467	-0.00144	-0.02694
						207	0.01315	-0.00142	-0.02705	-0.00182		207	0.04456	-0.00116	-0.02678
						207.5	0.0133	-0.00153	-0.02741	-0.00153		207.5	0.04458	-0.00154	-0.02688
						208	0.01346	-0.001	-0.02689	-0.00213		208	0.045	-0.00139	-0.02711
						208.5	0.01349	-0.00148	-0.02725	-0.00159		208.5	0.0449	-0.00138	-0.02681
						209	0.01389	-0.00133	-0.02723	-0.00194		209	0.04532	-0.00163	-0.02718
						209.5	0.01329	-0.00118	-0.02734	-0.00128		209.5	0.04534	-0.00121	-0.02701
						210	0.01395	-0.00141	-0.02745	-0.00175		210	0.0451	-0.00159	-0.02724

## Sheet: FR C. thermalis
Replicate 1						Replicate 2					Replicate 3
	Acceptors	DCMU	DCMU+His	DCMU+His+NaN3			Acceptors	DCMU	DCMU+His			Acceptors	DCMU	DCMU+His
-60	-0.00027859	-0.000437981	4.98415e-05	-0.000188349		0	7.64748e-05	-0.000590713	-0.00041693		0	-0.000185463	0.000228309	5.3597e-05
-59.5	5.07439e-06	0.000223577	7.40134e-05	-0.000544952		0.5	-0.000279099	-5.83234e-05	-8.66945e-06		0.5	-0.000152274	-1.00645e-05	-0.000176982
-59	-0.000348261	-0.000131866	-2.88148e-05	-0.000137555		1	-0.000131673	-0.000153934	-0.000104409		1	-0.000252085	0.000283562	0.000257438
-58.5	0.000189403	2.06913e-05	-4.64293e-06	-0.000239158		1.5	-0.000236247	-0.000124544	-7.41477e-05		1.5	4.71041e-05	-8.78116e-05	2.68588e-05
-58	-0.000290932	-0.000335751	1.95289e-05	-8.67607e-05		2	-0.000466821	0.000155846	0.000333113		2	-0.000185707	7.28148e-05	0.000328279
-57.5	0.000119732	-5.51941e-05	4.37008e-05	-0.000188364		2.5	-6.73951e-05	-0.000569764	-1.36259e-05		2.5	0.000113482	0.000366441	0.0002307
-57	-0.000233603	0.000351363	-0.000314127	-0.000162967		3	-0.000297969	-0.000414374	1.66349e-05		3	1.36714e-05	-4.9323e-06	0.000133121
-56.5	0.000304061	0.000122921	9.20444e-05	-1.05696e-05		3.5	-0.000150543	-6.98455e-06	-7.91042e-05		3.5	-0.000219139	0.000288694	0.000301541
-56	7.8726e-05	0.000148478	-0.000392784	-0.000239173		4	-0.000255117	-0.000481595	-0.000174843		4	8.00497e-05	-8.26794e-05	-6.20383e-05
-55.5	0.00023439	0.000301035	1.23881e-05	-0.000595776		4.5	0.000143309	-7.42049e-05	-1.85824e-05		4.5	-0.000285761	0.000343947	0.000239382
-55	8.05501e-06	7.25926e-05	-0.00034444	-0.000443378		5	0.000164735	-0.000296815	-0.000492322		5	-0.000252572	-2.74265e-05	-0.000124197
-54.5	-0.00021728	9.815e-05	0.000188732	-0.000290981		5.5	-0.000316839	-1.54253e-05	0.000293939		5.5	4.6617e-05	1.99901e-07	4.42234e-05
-54	0.000193384	0.000123707	-0.000296096	-0.000519584		6	8.25871e-05	1.39645e-05	-5.37998e-05		6	-0.000186194	2.78263e-05	0.000212644
-53.5	-0.000286951	0.000276265	0.000109076	-0.000494187		6.5	-0.000273987	-0.000460646	-2.35389e-05		6.5	0.000112995	-7.75472e-05	-1.79354e-05
-53	-4.28693e-06	0.000174822	-0.000247753	-0.00084979		7	0.000125439	-5.32559e-05	0.000258722		7	1.31844e-05	0.000216079	0.000283485
-52.5	-0.000229622	-0.000308621	-9.65808e-05	0.000192607		7.5	-0.000105135	-0.000401866	-0.000341017		7.5	4.63735e-05	-0.000155294	0.000185906
-52	5.30421e-05	-2.90634e-05	-0.000199409	-0.000671996		8	-0.000335709	5.52375e-06	-0.000184756		8	7.95626e-05	0.000271332	0.000221326
-51.5	-0.000299293	0.000378494	-4.82371e-05	-0.000138599		8.5	6.37172e-05	3.49136e-05	9.75046e-05		8.5	-0.000153248	3.29585e-05	0.000389747
-51	-0.000143629	0.000404051	-0.000405065	-0.000367202		9	-0.000292857	-0.000438697	1.76545e-06		9	0.000145941	0.000459585	2.61675e-05
-50.5	-0.000241964	-0.000206391	1.06574e-07	4.01949e-05		9.5	0.000357569	0.000219693	3.20263e-05		9.5	-8.68701e-05	0.000221211	0.000327588
-50	-8.62999e-05	-5.3834e-05	-0.000229722	-0.000443408		10	-0.000502005	0.000123083	-6.37128e-05		10	0.000212319	0.000381838	-3.59914e-05
-49.5	-0.000184635	-0.000536277	4.84503e-05	-0.000164011		10.5	-0.000102579	2.64728e-05	-3.34519e-05		10.5	-0.000153492	0.000276464	0.000398429
-49	-0.000155971	-0.000256719	-5.43779e-05	-0.000265614		11	-8.11527e-05	-7.01374e-05	0.000122809		11	1.26973e-05	0.000171091	-9.81502e-05
-48.5	-0.000127306	-0.000231162	9.6794e-05	-0.000748217		11.5	-0.000311727	-0.000166748	-0.00047593		11.5	4.58864e-05	0.000331717	0.00033627
-48	-0.000225642	0.000175395	-0.000133034	-0.00059582		12	-0.000164301	-1.13578e-05	-0.000193669		12	-0.000186924	-3.96564e-05	0.000105691
-47.5	-0.000196977	-0.000307047	-0.000108862	-6.24229e-05		12.5	-0.000394875	1.8032e-05	-0.000289408		12.5	0.000112265	0.00012097	8.11152e-06
-47	-0.000168313	9.951e-05	-8.46905e-05	-0.000418026		13	0.000130551	-7.85781e-05	-0.000385148		13	-0.000253546	-0.000117403	0.000176532
-46.5	-1.26483e-05	-0.000128933	-0.000187519	-1.16288e-05		13.5	-0.000603023	0.000328812	0.000148113		13.5	4.56428e-05	4.3223e-05	-5.40473e-05
-46	-0.000237984	0.000277625	-3.63468e-05	0.000140768		14	-0.000330597	-1.97985e-05	-0.000198626		14	-0.000187168	0.000203849	0.000247373
-45.5	0.000171681	-7.7818e-05	-0.000266175	-0.000468835		14.5	-0.000434171	0.000261591	0.000208635		14.5	-0.000153979	9.84758e-05	-0.000116206
-45	-5.36547e-05	0.000201739	0.000138997	-0.000570438		15	-0.000161745	-0.000338019	-0.000138104		15	0.00027821	0.000259102	0.000318214
-44.5	0.00022901	0.000100297	-0.000344831	-0.000545041		15.5	-1.43185e-05	0.000194371	-0.000233843		15.5	-8.76007e-05	2.07287e-05	-4.5365e-05
-44	0.000130674	0.000379854	0.000187341	-0.000265644		16	-0.000369892	0.000475761	4.84177e-05		16	-0.000187412	0.000314355	-9.94442e-06
-43.5	0.000159339	2.44114e-05	-0.000296488	-0.000749247		16.5	-0.000348466	-0.000123849	-0.000425321		16.5	0.000111778	-5.70184e-05	0.000291476
-43	0.000188003	0.000176969	0.000235684	-0.000596849		17	-0.00032704	0.00015654	0.000108939		17	-0.000254033	0.000369608	-0.000205103
-42.5	0.000216668	-0.000432474	-0.000248144	6.45476e-05		17.5	-0.000180614	-6.50698e-05	-0.0002388		17.5	0.000178156	0.000131234	0.000229317
-42	-8.66763e-06	0.000482083	0.000157028	-3.70554e-05		18	9.28116e-05	-3.568e-05	-0.000334539		18	-5.46551e-05	0.000291861	-0.000134262
-41.5	0.000273997	0.000126641	-0.0003278	-0.000265658		18.5	-0.000388762	0.00049671	7.37221e-05		18.5	-0.000154466	0.000319487	3.41585e-05
-41	0.000175661	0.000152198	0.000205372	1.37387e-05		19	-0.000241336	2.30996e-05	-0.000400017		19	0.000144723	8.11138e-05	6.95791e-05
-40.5	7.73259e-05	5.07554e-05	-0.000279457	-0.000214864		19.5	-0.00047191	0.000178489	-0.000243756		19.5	-0.000221088	0.00010874	-0.000161
-40	0.00010599	7.63127e-05	0.000253715	0.000318533		20	-7.34843e-05	8.18792e-05	0.000164505		20	0.000211101	3.36668e-06	0.00014042
-39.5	-0.000120345	-0.00015213	-0.000358113	-0.00016407		20.5	-0.000429058	0.000362269	-0.000434234		20.5	-0.00028771	0.000296993	-0.000223159
-39	0.000163319	0.000127427	0.000175059	-1.16731e-05		21	-0.000281632	0.000266659	-2.69735e-05		21	1.14796e-05	-7.43804e-05	0.000211261
-38.5	-0.000190016	-0.000228015	-0.000309769	0.000521724		21.5	-9.20623e-06	-8.19514e-05	-0.000248713		21.5	4.46687e-05	8.6246e-05	-0.000152318
-38	0.000220648	-0.000202458	9.64027e-05	0.000293121		22	-0.00023878	0.000199438	-0.000343452		22	-0.000188142	0.000246872	1.61025e-05
-37.5	-0.000132687	-0.000431901	-0.000134425	0.000827518		22.5	0.000159646	0.000354828	-6.21909e-05		22.5	0.000244047	8.49889e-06	5.15231e-05
-37	0.000277978	0.000356657	-0.000110254	0.000216915		23	-0.000573928	-0.000119782	-0.00015793		23	-0.000254764	0.000302125	-0.000179056
-36.5	-7.5358e-05	-0.000125786	-0.000340082	0.000369312		23.5	-4.85021e-05	0.000287608	-1.66914e-06		23.5	0.000177425	-6.92482e-05	0.000122364
-36	0.000335307	0.000280771	-0.00018891	0.000140709		24	-0.000153076	-0.000187002	-9.74083e-05		24	-5.53857e-05	0.000224378	-0.000108215
-35.5	0.000108971	-7.46712e-05	-3.77381e-05	0.000293106		24.5	-0.00013165	0.000346388	5.88526e-05		24.5	-2.21966e-05	-1.39954e-05	0.000193205
-35	-0.000116364	7.78861e-05	-0.000267566	6.45032e-05		25	-0.000236224	0.000375777	0.000467113		25	0.000143992	0.000279631	-0.000170374
-34.5	0.0002943	-2.35566e-05	-0.000243394	-3.70997e-05		25.5	-8.87981e-05	-0.000224833	-0.000383626		25.5	4.41816e-05	4.12575e-05	-0.000134953
-34	-0.000186035	0.000129001	-0.000346223	-0.000266703		26	0.000183628	0.000182557	0.000275635		26	-5.56293e-05	0.000201884	3.34672e-05
-33.5	0.000223629	0.000154558	-0.000195051	0.000140694		26.5	-0.000171946	-4.00532e-05	-0.000197104		26.5	0.00024356	0.00022951	-0.000197112
-33	-0.000128706	0.000180115	-0.000424879	-0.000215909		27	-0.00040252	0.000115337	8.4157e-05		27	-0.000255251	-0.000141863	0.000104308
-32.5	0.000280958	0.000459673	-0.000146707	-6.35116e-05		27.5	0.000247906	-0.000358274	0.000240418		27.5	0.000176938	0.000284763	6.72892e-06
-32	-7.13774e-05	0.00010423	-0.000376535	-0.000419115		28	-0.000359668	-0.000202884	-0.000232321		28	-5.58728e-05	-8.66103e-05	-9.08505e-05
-31.5	0.000338287	0.000129787	-9.83634e-05	-0.000393717		28.5	3.97581e-05	-0.000173494	-7.60604e-05		28.5	0.000110316	0.000340016	7.75701e-05
-31	-0.000141048	-0.000226655	-0.000328192	-0.00011432		29	-0.000190816	-1.91042e-05	8.02005e-05		29	0.000276505	-3.13574e-05	-0.000153009
-30.5	0.000268616	0.000180902	-0.00030402	3.80766e-05		29.5	-0.00016939	0.000262286	-1.55386e-05		29.5	-8.93055e-05	0.000129269	0.000148411
-30	-0.000210719	0.000333459	-0.000152848	0.000318474		30	0.000104036	-8.53246e-05	0.000140722		30	0.000342884	2.38955e-05	-0.000215168
-29.5	0.000325945	0.000232017	-0.000128676	-3.81293e-05		30.5	-0.000503538	6.90652e-05	-0.000207017		30.5	-2.29272e-05	5.15219e-05	0.000219252
-29	-0.00015339	2.57413e-06	-0.000358504	0.000114268		31	0.000146888	0.000224455	-0.000176756		31	0.000276262	0.000345148	-1.1327e-05
-28.5	0.000129274	0.000283131	4.66677e-05	0.000267665		31.5	-0.000335686	0.000127845	0.000105505		31.5	0.000309451	-2.62252e-05	-0.000108906
-28	-9.60612e-05	0.000180689	-0.00031016	0.000293062		32	0.00018974	0.000283235	-0.000493234		32	-5.63599e-05	0.000134401	0.000192514
-27.5	0.000186603	0.000334246	9.50114e-05	6.34589e-05		32.5	-0.000292834	-6.43755e-05	-0.000211973		32.5	0.000242829	2.90277e-05	-0.000171065
-27	-3.87322e-05	-2.21965e-05	-0.000261817	0.000343856		33	0.000232592	-0.000160986	-0.000432712		33	-0.000122982	5.66541e-05	-2.6447e-06
-26.5	0.000116932	0.000130361	0.000143355	0.000241253		33.5	0.000128018	0.000245404	0.000100548		33.5	4.32074e-05	0.000350281	-0.000100224
-26	0.000145597	-9.80818e-05	-8.64731e-05	1.265e-05		34	-0.000102556	-0.000228206	4.80926e-06		34	7.63966e-05	-2.1093e-05	-0.000197804
-25.5	-7.97387e-05	0.000436475	6.46988e-05	0.000292047		34.5	4.48704e-05	0.000179184	-0.00034193		34.5	-2.34143e-05	0.000272533	0.000103617
-25	0.000202926	-4.69672e-05	-3.81294e-05	0.000317444		35	-0.000436704	-0.000169426	6.5331e-05		35	0.000275775	3.41599e-05	-0.000126962
-24.5	-2.24096e-05	0.00023259	0.000113042	0.000342841		35.5	8.77224e-05	0.000111963	-0.000407408		35.5	0.000308964	0.000194786	-9.15418e-05
-24	0.000387255	-0.000376853	1.02143e-05	0.000368238		36	-0.000393852	0.000644353	0.000251853		36	7.6153e-05	0.000222413	0.000209879
-23.5	-9.30806e-05	0.000156705	3.43862e-05	0.000139635		36.5	-0.000624426	-0.000207257	-9.58864e-05		36.5	0.000375342	-1.59608e-05	-0.000153701
-23	0.000317584	0.000182262	5.8558e-05	-8.89678e-05		37	-9.99995e-05	0.000577133	-0.000316625		37	9.53125e-06	0.000277666	-0.00011828
-22.5	-0.000162752	0.00020782	8.27298e-05	0.000444429		37.5	-7.85735e-05	-0.000274477	-0.000160365		37.5	0.00017572	-9.37079e-05	5.01405e-05
-22	0.000247913	-2.06232e-05	0.000106902	8.88263e-05		38	0.000320853	0.000384912	-0.000130104		38	-5.70905e-05	0.000332919	-0.000180439
-21.5	-0.000105423	0.000258934	0.000131074	0.000368223		38.5	9.02785e-05	0.000288302	-0.000351843		38.5	0.000109099	-3.8455e-05	0.000253982
-21	0.000178242	3.04915e-05	2.82454e-05	0.00026662		39	-0.000139295	-6.0308e-05	5.5418e-05		39	0.000142288	-0.000143829	2.34023e-05
-20.5	-4.80935e-05	-7.09511e-05	-0.000201583	0.000165017		39.5	0.000133131	0.000473082	-3.93211e-05		39.5	4.24768e-05	0.000282798	0.000191823
-20	0.000107571	-0.000172394	7.65891e-05	0.000444415		40	-9.64434e-05	-0.000127528	0.00024194		40	0.000341666	-8.85757e-05	0.000227243
-19.5	0.000264235	0.000234164	-0.000153239	0.000342812		40.5	0.000175983	0.000656861	2.12007e-05		40.5	0.000108855	0.000338051	-3.336e-06
-19	0.0002929	5.72087e-06	0.000124933	0.000241209		41	-0.000431591	0.000183251	-7.45385e-05		41	0.000408044	0.000232677	0.000165085
-18.5	0.000321565	3.12782e-05	-0.000232895	0.000520606		41.5	9.28347e-05	-3.93589e-05	0.000332722		41.5	0.000308233	-0.000138696	-6.64948e-05
-18	9.5229e-05	0.000183836	4.62764e-05	-8.89973e-05		42	-0.000136739	0.000116031	-1.40167e-05		42	0.000208422	0.00015493	-3.10743e-05
-17.5	0.000378894	8.23929e-05	-0.000311552	0.0009534		42.5	-0.000115313	0.000145421	1.62442e-05		42.5	0.000374612	-8.34435e-05	0.000138346
-17	2.55581e-05	0.00061595	9.46201e-05	0.000215797		43	3.21127e-05	4.88105e-05	-0.000331495		43	8.80063e-06	-5.5817e-05	-0.000226233
-16.5	0.000436223	0.000260508	-0.000263208	0.000368194		43.5	0.000178539	7.82003e-05	-4.92341e-05		43.5	0.00030799	-2.81906e-05	0.000209187
-16	-4.41129e-05	0.000794065	1.59638e-05	1.25908e-05		44	0.000199965	-0.00026941	0.000107027		44	0.000208179	-0.000266564	-2.23919e-05
-15.5	0.000111552	0.000438622	-8.78643e-05	0.000418988		44.5	-0.000281609	0.00038898	-0.000366712		44.5	-2.4632e-05	0.000293062	0.000280029
-15	-0.000113784	0.00084518	6.43075e-05	0.000317385		45	0.000368817	-8.46302e-05	0.000293549		45	0.000407557	5.46887e-05	0.000181449
-14.5	4.18806e-05	0.000362737	8.84793e-05	8.8782e-05		45.5	-0.000112757	-5.52404e-05	-5.41906e-05		45.5	4.17462e-05	0.000348315	-0.00018213
-14	-5.64549e-05	0.000896294	-0.000142349	-0.000140821		46	0.000160669	0.000225149	0.00035407		46	0.000340935	0.000242942	0.00011929
-13.5	9.92097e-05	0.000540852	8.82303e-06	0.000266576		46.5	5.60949e-05	-0.000122461	6.33117e-06		46.5	0.000108124	0.000137568	-0.000244289
-13	8.74173e-07	0.000820409	-0.000221005	0.000164973		47	-0.000174479	0.000283929	-0.000215408		47	0.000141314	0.000298194	-7.58685e-05
-12.5	-9.74613e-05	0.000718966	5.71667e-05	-6.46299e-05		47.5	0.000224947	0.000188319	0.000192853		47.5	0.000307503	-7.31791e-05	9.25521e-05
-12	-0.000195797	0.000871524	-0.000299661	-0.000166233		48	0.000120373	9.17086e-05	9.71138e-05		48	7.46918e-05	0.000353447	-0.000271027
-11.5	-0.000294132	0.000770081	0.00010551	-1.38358e-05		48.5	-0.000110201	-4.90156e-06	-0.000124625		48.5	0.000506881	-0.000150926	0.000163393
-11	-0.000265468	0.00105	-0.000124318	0.000266561		49	3.7225e-05	-0.000101512	0.000157636		49	0.00014107	9.70024e-06	-0.000200186
-10.5	-0.000364803	0.000694196	0.000153854	3.69583e-05		49.5	0.000184651	0.000305878	-0.000190104		49.5	0.000440259	-9.56733e-05	0.000101234
-10	0.000426861	0.000846753	5.10259e-05	0.000317355		50	8.00771e-05	-0.000168732	0.000344157		50	0.000340448	-6.80469e-05	3.65502e-06
-9.5	-0.000179474	-1.76897e-05	-5.18022e-05	0.000215752		50.5	-2.44969e-05	0.000112658	-0.000380582		50.5	0.000240637	0.00035858	-0.000226924
-9	0.00023019	0.000770868	9.93696e-05	-1.38506e-05		51	-3.07089e-06	-0.000235953	0.000152679		51	0.000539826	-1.2794e-05	7.44962e-05
-8.5	4.8548e-06	0.000288425	-0.000130459	-0.000115454		51.5	-0.000233645	4.54373e-05	5.69399e-05		51.5	4.10156e-05	0.000147832	-0.000156083
-8	0.000414519	0.000567982	0.000147713	-0.000217056		52	0.000417781	0.000326827	-0.000163799		52	0.000606205	0.000175459	0.000145337
-7.5	0.000189184	0.00021154	-0.000209115	6.23406e-05		52.5	6.12072e-05	0.000230217	0.000117462		52.5	0.000240394	7.00853e-05	-8.52421e-05
-7	0.000852848	0.000110097	6.9057e-05	-3.92624e-05		53	-0.000294367	-0.000118393	-0.000355277		53	0.000406583	0.000230712	-4.98215e-05
-6.5	0.000373513	0.000644654	-0.000287771	-0.000521865		53.5	0.000230059	0.000288997	0.000303983		53.5	0.000572772	-0.000140662	0.000118599
-6	0.00104	0.000161212	0.000117401	-0.000369468		54	-0.000126515	-5.96136e-05	-4.27557e-05		54	0.000206961	0.000152965	-0.00024498
-5.5	0.000430842	0.000313769	-0.000239427	-9.00713e-05		54.5	0.000398911	0.000347776	0.000112505		54.5	0.00037315	-0.000218409	0.00018944
-5	0.000967506	8.53263e-05	0.000165744	-0.000318674		55	-0.000460663	-0.000251834	0.000394766		55	0.000406339	-0.000190782	9.18608e-05
-4.5	0.000742171	0.000619884	-0.000191084	-0.000420277		55.5	-6.22367e-05	-0.000222444	-0.000329973		55.5	0.000173528	-0.000163156	-0.000138719
-4	0.000643835	0.000263441	0.000214088	0.00011312		56	8.51893e-05	-0.000193054	0.000329288		56	0.000472718	-2.52958e-06	0.000162702
-3.5	0.0004185	0.000924998	-0.00014274	0.000138517		56.5	-0.000144385	-3.76646e-05	-0.000269451		56.5	0.000105907	2.50969e-05	-0.000200877
-3	0.000574164	6.05556e-05	0.000262432	-0.000217086		57	0.000128041	0.000116725	1.28096e-05		57	0.000539096	-0.000214277	0.000100543
-2.5	0.000475829	0.000213113	-0.000221396	-6.4689e-05		57.5	-0.000227533	-0.000104885	0.00042007		57.5	0.000306285	8.03497e-05	2.96372e-06
-2	0.000377493	-1.53297e-05	0.000183775	-0.000420292		58	-0.000332107	5.05048e-05	-0.000304669		58	0.000339474	-0.000159024	-9.46157e-05
-1.5	0.000406158	0.000773228	8.09473e-05	0.000367105		58.5	-5.86806e-05	0.000330895	-2.24078e-05		58.5	0.000505663	0.000268603	0.000206805
-1	0.000307823	0.000289785	-0.000148881	-0.000115498		59	-3.72545e-05	-0.000268716	7.85308e-06		59	5.8523e-06	-0.000103771	-0.000289775
-0.5	0.000336487	0.000188342	0.000129291	-0.000217101		59.5	0.000109171	0.000138674	-8.7886e-05		59.5	0.000572041	5.78555e-05	0.000144646
0	0.000365152	-0.0001671	-0.000228537	0.000189296		60	-0.000624402	-0.000586936	0.000320375		60	0.000205231	8.54819e-05	-0.000218933
0.5	0.000520816	-1.4543e-05	0.000177635	0.000214693		60.5	2.70235e-05	7.14539e-05	-0.000279364		60.5	0.00023842	-0.000153892	8.24872e-05
1	0.000294481	0.000265014	-5.21935e-05	0.00011309		61	-0.00032955	0.000100844	0.000128897		61	0.000404609	0.000273735	-0.000148092
1.5	0.000578145	0.000544572	9.89784e-05	0.000265487		61.5	6.98756e-05	-0.000247766	0.000159157		61.5	0.000171798	-9.86387e-05	-0.000112672
2	0.00035181	0.000189129	-0.00025885	0.000799884		62	-3.46984e-05	0.000159623	-6.25817e-05		62	0.000604987	6.19877e-05	0.000188749
2.5	0.000762474	0.000722686	0.000274322	0.000316281		62.5	-0.000391272	-0.000188987	0.000219679		62.5	0.000371176	8.96141e-05	-0.00017483
3	0.000537139	0.000240244	-0.000210506	0.000214678		63	0.000259154	0.000344403	-0.00012806		63	0.000404365	-1.57594e-05	0.00025959
3.5	0.000946803	0.000901801	0.000322666	-1.39245e-05		63.5	2.95797e-05	0.000121793	2.8201e-05		63.5	0.000970554	0.000278867	-0.000236989
4	0.000721468	0.000672358	9.28376e-05	0.000392473		64	0.000428006	-0.000351817	0.000310462		64	0.000603743	-9.35065e-05	6.44313e-05
4.5	0.001	0.000952916	0.000371009	0.00029087		64.5	-5.35683e-05	5.45724e-05	-3.72773e-05		64.5	0.000903933	0.00033412	-3.31482e-05
5	0.000778797	0.000596473	0.000141181	0.000443267		65	0.000344858	-4.20378e-05	0.000244984		65	0.00107	9.47463e-05	-0.000263728
5.5	0.00106	0.00087603	0.000419353	0.000341664		65.5	0.000366284	-0.000138648	-0.000227756		65.5	0.000970311	0.000255373	0.000170693
6	0.00109	0.00116	0.000189525	0.000494061		66	0.00026271	1.67418e-05	5.35054e-05		66	0.00154	0.000282999	-5.98864e-05
6.5	0.00125	0.00118	0.000340697	0.000519458		66.5	0.000787136	-7.98684e-05	0.000335766		66.5	0.0013	4.46257e-05	0.000108534
7	0.0014	0.000952702	0.000109869	0.000290855		67	0.00106	0.000201521	0.000240027		67	0.0016	0.000472252	0.000276955
7.5	0.0013	0.00072426	0.00051604	0.000316252		67.5	0.00108	-2.10887e-05	1.9288e-05		67.5	0.00164	9.98786e-05	-8.66247e-05
8	0.00159	0.000876817	0.000413212	0.000595649		68	0.0011	0.000260301	0.000552549		68	0.00154	0.000527505	0.000214796
8.5	0.00149	0.00103	0.000182384	0.000621046		68.5	0.00099884	3.76909e-05	-0.00029819		68.5	0.0021	2.21314e-05	0.000117216
9	0.0019	0.00105	0.000461556	0.000646443		69	0.0014	0.000193081	-1.59294e-05		69	0.002	0.000315758	-0.000246363
9.5	0.00167	0.00134	0.000103728	0.00054484		69.5	0.000789692	0.00060047	1.43315e-05		69.5	0.00243	0.000343384	-7.79424e-05
10	0.00221	0.000852046	0.0005099	0.00171		70	0.00119	0.00025186	-0.000207408		70	0.00247	0.000105011	-0.000441522
10.5	0.00198	0.00126	0.000152072	0.000595634		70.5	0.000832544	0.00040725	7.48532e-05		70.5	0.0025	0.000531637	-0.000672101
11	0.00239	0.00141	0.000431243	0.000748031		71	0.00111	0.00018464	-0.000398886		71	0.00293	0.000293264	-0.000370681
11.5	0.00204	0.00131	0.000200415	0.000265428		71.5	0.00125	8.90297e-05	0.000261375		71.5	0.00257	0.00045389	-0.00060126
12	0.00245	0.00146	0.000479587	0.00105		72	0.0014	0.00062142	3.96359e-05		72	0.00286	0.000481517	-0.000299839
12.5	0.00223	0.000725833	0.000248759	0.000570222		72.5	0.0013	0.000272809	-0.000308103		72.5	0.0029	0.000243143	-0.000530419
13	0.00276	0.00113	0.000527931	0.000722619		73	0.00144	0.000177199	-2.58424e-05		73	0.00306	0.000669769	-0.000627998
13.5	0.00266	0.000903948	0.000170103	0.00113		73.5	0.00184	0.000457589	-0.000498582		73.5	0.00363	0.000298396	-0.000592578
14	0.00282	0.00157	0.000576274	0.000900413		74	0.00186	0.000109979	-0.000217321		74	0.00366	0.000592022	-0.000956157
14.5	0.00298	0.00146	0.000218446	0.00067181		74.5	0.00151	0.000768369	-0.00031206		74.5	0.0037	0.000353649	-0.000787737
15	0.003	0.00174	0.000624618	0.000951207		75	0.00216	-8.32416e-05	-0.000407799		75	0.00413	0.000514275	-0.000885316
15.5	0.00316	0.00164	0.00013979	0.000976605		75.5	0.0018	0.000324148	0.000251462		75.5	0.00376	0.000674902	-0.00112
16	0.00319	0.00167	0.000417962	0.001		76	0.00182	0.000478538	-9.62771e-05		76	0.00419	0.000303528	-0.000814475
16.5	0.00347	0.00131	0.000188134	0.000519399		76.5	0.00184	0.000382928	-0.000191016		76.5	0.00409	0.000730154	-0.00118
17	0.00325	0.00197	0.000466306	0.000925796		77	0.00149	0.000286318	0.000342245		77	0.00426	0.000358781	-0.000876634
17.5	0.00378	0.00136	0.000109477	0.00121		77.5	0.00227	6.37075e-05	-0.000256494		77.5	0.00456	0.000519407	-0.00111
18	0.00356	0.00151	0.000387649	0.0011		78	0.00191	0.000471097	2.47664e-05		78	0.00459	0.000414034	-0.0012
18.5	0.00397	0.00141	3.08211e-05	0.000620987		78.5	0.00256	0.000248487	5.50273e-05		78.5	0.00503	0.00030866	-0.00117
19	0.00374	0.00182	0.000562993	0.000773384		79	0.00183	0.000277877	-3.97119e-05		79	0.00506	0.000735287	-0.00153
19.5	0.00403	0.00146	7.91647e-05	0.00105		79.5	0.0026	0.000433267	-9.45099e-06		79.5	0.00536	0.000363913	-0.00136
20	0.0038	0.00162	0.000611337	0.000824178		80	0.00237	8.46565e-05	-0.00010519		80	0.00552	0.00065754	-0.00173
20.5	0.00421	0.00139	0.000127508	0.000976575		80.5	0.00265	0.000492046	0.000176071		80.5	0.00542	0.000818166	-0.00169
21	0.00411	0.00205	0.00065968	0.000747972		81	0.00279	0.000647436	0.000206332		81	0.00586	0.000446792	-0.00179
21.5	0.00452	0.00157	0.000175852	0.00115		81.5	0.00218	0.000172826	-0.000140407		81.5	0.00562	0.000740419	-0.00202
22	0.0043	0.00185	0.000581024	0.000798766		82	0.00296	0.000328216	0.000141853		82	0.00606	0.000369045	-0.00172
22.5	0.00471	0.00174	0.000224196	0.000824163		82.5	0.00248	0.000105606	-0.000331886		82.5	0.00596	0.000529672	-0.00195
23	0.00473	0.00177	0.000502368	0.00034056		83	0.00313	8.9954e-06	7.63751e-05		83	0.00612	0.000291298	-0.00178
23.5	0.00489	0.00192	1.85395e-05	0.00126		83.5	0.00265	3.83852e-05	-0.000522364		83.5	0.00669	0.000318925	-0.00228
24	0.00543	0.00169	0.000423711	0.000772354		84	0.0028	0.000193775	-0.000367103		84	0.00645	0.000612551	-0.00198
24.5	0.00533	0.00172	6.68832e-05	0.000797751		84.5	0.00332	0.000601165	-0.000336842		84.5	0.00689	0.000374178	-0.00194
25	0.00561	0.00162	0.000472055	0.00133		85	0.00271	1.55464e-06	-0.000431581		85	0.00705	0.000667804	-0.00244
25.5	0.00551	0.00203	-1.27731e-05	0.00123		85.5	0.00324	0.000155944	0.00010168		85.5	0.00695	0.00056243	-0.002
26	0.00605	0.00167	0.000393399	0.001		86	0.00288	0.000437334	-0.00049706		86	0.00739	0.000723057	-0.0025
26.5	0.00557	0.00182	3.55706e-05	0.00128		86.5	0.00315	0.000340724	-0.000340799		86.5	0.00715	0.000750683	-0.0022
27	0.00598	0.00147	0.000441742	0.00143		87	0.00355	0.000370114	-0.000310538		87	0.00785	0.00064531	-0.00256
27.5	0.00575	0.00226	0.000211914	0.00108		87.5	0.00295	0.000148504	-0.000658277		87.5	0.00775	0.000805936	-0.00253
28	0.00617	0.0019	0.000236086	0.000975531		88	0.00322	0.000554894	-0.000250016		88	0.00792	0.000434563	-0.00249
28.5	0.00594	0.0018	0.000260258	0.000746928		88.5	0.00299	0.000710283	-0.000849755		88.5	0.00835	0.000595189	-0.00272
29	0.00635	0.00182	0.00015643	0.00115		89	0.00339	0.000110673	-0.000693494		89	0.00812	0.000356816	-0.00255
29.5	0.00612	0.0021	0.000180602	0.00118		89.5	0.00353	0.000517063	-0.000285233		89.5	0.00868	0.000384442	-0.00305
30	0.00666	0.00175	0.000204773	0.00133		90	0.0033	0.000420453	-0.000506973		90	0.00858	0.000678068	-0.00275
30.5	0.00631	0.0019	0.000228945	0.000721516		90.5	0.0037	0.000449843	-0.000224712		90.5	0.00888	0.000572695	-0.00298
31	0.00685	0.00218	0.000126117	0.00189		91	0.0036	0.000731232	-0.000572451		91	0.00918	0.000733321	-0.00308
31.5	0.00637	0.00233	2.3289e-05	0.00115		91.5	0.004	5.62218e-06	-0.00041619		91.5	0.00895	0.000494948	-0.00304
32	0.00703	0.0016	0.000174461	0.00118		92	0.00326	0.000161012	-0.000259929		92	0.00951	0.000655574	-0.00341
32.5	0.00668	0.00213	-5.53673e-05	0.000696104		92.5	0.00417	0.000316402	-0.000858668		92.5	0.00928	0.000683201	-0.0031
33	0.00722	0.00177	9.58045e-05	0.00148		93	0.00431	0.000345792	-0.000325407		93	0.00945	0.000444827	-0.0036
33.5	0.00712	0.00218	-0.000134024	0.001		93.5	0.00396	0.000501181	-0.000798146		93.5	0.01001	0.000738453	-0.00317
34	0.00715	0.00195	0.000144148	0.00141		94	0.00423	0.000278571	-0.000390886		94	0.00978	0.00036708	-0.00326
34.5	0.0073	0.00249	-8.56799e-05	0.000670692		94.5	0.00375	0.000433961	-0.000486625		94.5	0.01034	0.000660706	-0.00376
35	0.00746	0.002	6.54919e-05	0.00184		95	0.00453	0.000714351	-0.000707364		95	0.00998	0.000289333	-0.00346
35.5	0.00761	0.00228	-0.000164336	0.000975486		95.5	0.00417	0.000240741	-0.000426103		95.5	0.01041	0.000449959	-0.00396
36	0.00751	0.00193	0.000113836	0.00113		96	0.00381	0.00077313	-0.000646842		96	0.01058	0.000610586	-0.00365
36.5	0.00792	0.00208	0.000138007	0.00077228		96.5	0.00446	-7.74797e-05	-0.000616581		96.5	0.01061	0.000239212	-0.00389
37	0.0077	0.00185	-0.000218821	0.00169		97	0.00436	0.00020291	-0.00020932		97	0.01104	0.000665839	-0.00385
37.5	0.00811	0.00188	0.000186351	0.000950074		97.5	0.00476	0.0003583	-0.000934059		97.5	0.01081	0.000294465	-0.00381
38	0.00788	0.00165	-0.000170477	0.000975471		98	0.00415	0.00038769	-0.000400799		98	0.01151	0.000455091	-0.00418
38.5	0.00829	0.00193	0.000107695	0.00125		98.5	0.00442	0.00066908	-0.000873538		98.5	0.01141	0.000349718	-0.00388
39	0.00794	0.00157	-0.000250133	0.00141		99	0.0047	0.000572469	-0.000465277		99	0.01157	0.000244344	-0.00411
39.5	0.00848	0.00236	0.000156039	0.00105		99.5	0.00472	0.000475859	-0.000813016		99.5	0.01201	0.000537971	-0.00407
40	0.00812	0.00175	-0.00020179	0.00133		100	0.00512	0.000631249	-0.000908755		100	0.01177	0.000299597	-0.0043
40.5	0.00879	0.00203	7.73822e-05	0.00136		100.5	0.00476	0.000157639	-0.000752494		100.5	0.01221	0.000460224	-0.0044
41	0.00831	0.00155	-0.000280446	0.00138		101	0.00491	0.000438029	-0.000974233		101	0.01211	0.00048785	-0.00436
41.5	0.00885	0.00145	-1.27412e-06	0.000644251		101.5	0.00493	0.000719418	-0.000439972		101.5	0.0124	0.000249477	-0.0046
42	0.00862	0.00134	-0.000232102	0.00118		102	0.00508	0.000370808	-0.00116		102	0.01257	0.000543103	-0.00443
42.5	0.00916	0.00201	4.70696e-05	0.00108		102.5	0.00522	0.000526198	-0.000757451		102.5	0.01247	0.000171729	-0.00492
43	0.00919	0.00165	-0.000183759	0.00136		103	0.00474	0.000178588	-0.00097819		103	0.0129	0.000598356	-0.00449
43.5	0.00883	0.00167	-3.25867e-05	0.000872839		103.5	0.00539	0.000710978	-0.000947929		103.5	0.0132	0.000226982	-0.00499
44	0.00924	0.00195	-0.000262415	0.00204		104	0.00504	0.000614367	-0.000792668		104	0.01297	0.000254609	-0.00508
44.5	0.00889	0.00185	-0.000111243	0.00105		104.5	0.00506	0.000140757	-0.00101		104.5	0.0134	0.000415235	-0.00465
45	0.00981	0.00175	-0.000341071	0.00108		105	0.0047	0.000547147	-0.000732146		105	0.0133	0.000176862	-0.00515
45.5	0.00908	0.00165	-6.28994e-05	0.000720427		105.5	0.00472	7.35369e-05	-0.000952885		105.5	0.01347	0.000470488	-0.00484
46	0.00961	0.00218	-0.000292728	0.00189		106	0.00525	0.000480927	-0.00105		106	0.0139	9.91145e-05	-0.00494
46.5	0.00939	0.00195	-0.000141556	0.00103		106.5	0.00514	0.000132317	-0.000641364		106.5	0.0138	0.000392741	-0.00504
47	0.01005	0.00211	-0.000498384	0.000923618		107	0.00554	3.57063e-05	-0.00124		107	0.01423	0.000154367	-0.005
47.5	0.0097	0.00175	-0.000220212	0.000822015		107.5	0.00544	0.000191096	-0.000705842		107.5	0.01427	0.000181994	-0.00537
48	0.01049	0.00241	-0.00057704	0.00136		108	0.00559	-0.000156514	-0.000927581		108	0.0147	0.00020962	-0.0052
48.5	0.01065	0.0018	-0.000171868	0.000872809		108.5	0.00548	0.000501876	-0.00064532		108.5	0.01473	0.000104247	-0.00556
49	0.01093	0.00208	-0.000655696	0.000771206		109	0.0055	0.000153266	-0.000993059		109	0.01463	0.000397873	-0.00539
49.5	0.0107	0.00198	-0.000250525	0.00118		109.5	0.0059	-6.83446e-05	-0.00109		109.5	0.0152	0.0001595	-0.00576
50	0.01111	0.00226	-0.000735353	0.000949		110	0.00542	0.000590045	-0.000680538		110	0.01496	5.4126e-05	-0.00572
50.5	0.01102	0.00165	-0.000329181	0.00123		110.5	0.00569	0.000367435	-0.00103		110.5	0.01526	0.000347752	-0.00582
51	0.0113	0.00218	-0.000814009	0.000872795		111	0.00571	1.98248e-05	-0.000620016		111	0.01543	-2.36211e-05	-0.00592
51.5	0.01133	0.00196	-0.000407837	0.00179		111.5	0.00574	0.000300215	-0.000841755		111.5	0.01546	0.000403005	-0.00575
52	0.01148	0.00236	-0.000765665	0.00105		112	0.00538	-0.000299396	-0.000937494		112	0.01603	0.000164632	-0.00611
52.5	0.01176	0.00201	-0.000486494	0.00108		112.5	0.0054	0.000484994	-0.000655233		112.5	0.01606	0.000325258	-0.00568
53	0.01154	0.00254	-0.000717322	0.000974383		113	0.0058	0.000262384	-0.001		113	0.01609	8.68847e-05	-0.00617
53.5	0.01195	0.00219	-0.00056615	0.00138		113.5	0.00582	4.07739e-05	-0.000846711		113.5	0.01653	-1.84889e-05	-0.00587
54	0.01172	0.00259	-0.000795978	0.000898177		114	0.00622	0.000321164	-0.00132		114	0.01629	0.000408138	-0.00597
54.5	0.01213	0.00224	-0.000517806	0.000923574		114.5	0.00624	-0.000278447	-0.00104		114.5	0.01659	3.6764e-05	-0.00633
55	0.01204	0.00214	-0.000747634	0.00133		115	0.00576	2.9433e-06	-0.00138		115	0.01689	0.00019739	-0.00617
55.5	0.01219	0.00178	-0.000469462	0.00148		115.5	0.00628	3.23331e-05	-0.00135		115.5	0.01679	-4.09831e-05	-0.00653
56	0.01184	0.00193	-0.000826291	0.000745765		116	0.00605	-6.42771e-05	-0.000946407		116	0.01736	0.000119643	-0.00649
56.5	0.01174	0.00234	-0.000421119	0.00115		116.5	0.0067	0.000468113	-0.00117		116.5	0.01739	1.42697e-05	-0.00672
57	0.01164	0.00198	-0.00103	0.00143		117	0.00597	0.000246503	-0.000885885		117	0.01756	4.18962e-05	-0.00682
57.5	0.0118	0.00239	-0.000499775	0.00133		117.5	0.0065	0.000149892	-0.00111		117.5	0.01786	0.000202523	-0.00679
58	0.01208	0.00216	-0.000856603	0.000592353		118	0.00664	0.000556282	-0.0012		118	0.01762	-3.58509e-05	-0.00688
58.5	0.01211	0.00181	-0.000578431	0.00099975		118.5	0.00641	-4.3328e-05	-0.000921103		118.5	0.01819	0.000390776	-0.00672
59	0.01277	0.0017	-0.00106	0.000771147		119	0.00669	0.000238062	-0.00114		119	0.01822	1.94019e-05	-0.00695
59.5	0.01242	0.00186	-0.000530088	0.000923544		119.5	0.0062	0.000393452	-0.000986581		119.5	0.01812	4.70284e-05	-0.00664
60	0.0127	0.00239	-0.00114	0.000948941		120	0.00685	0.000296841	-0.00159		120	0.01869	0.000340655	-0.00714
60.5	0.01235	0.00229	-0.000735744	0.00123		120.5	0.00637	0.000200231	-0.0013		120.5	0.01859	-0.000163719	-0.00684
61	0.01289	0.00193	-0.00122	0.00113		121	0.00665	0.000229621	-0.00152		121	0.01875	0.000129908	-0.0072
61.5	0.01241	0.00234	-0.0008144	0.000516132		121.5	0.00642	7.01084e-06	-0.00137		121.5	0.01919	-0.000108466	-0.00704
62	0.01295	0.00211	-0.00117	0.00079553		122	0.00669	0.000414401	-0.00109		122	0.01895	-8.08394e-05	-0.00727
62.5	0.01297	0.00239	-0.000766057	0.000948927		122.5	0.00709	0.00019179	-0.00156		122.5	0.01912	-5.3213e-05	-0.00736
63	0.01275	0.00191	-0.00112	0.00123		123	0.00661	0.00034718	-0.00115		123	0.01969	-0.000158587	-0.00733
63.5	0.01278	0.00206	-0.000717713	0.000490721		123.5	0.00675	0.00037657	-0.00137		123.5	0.01945	0.00013504	-0.00756
64	0.01281	0.00171	-0.00108	0.00153		124	0.00665	2.79599e-05	-0.00109		124	0.01975	-0.000236334	-0.00739
64.5	0.01322	0.00249	-0.000669369	0.000795515		124.5	0.00692	0.00068735	-0.00169		124.5	0.02018	0.000190293	-0.00762
65	0.01312	0.00214	-0.00115	0.00108		125	0.00719	0.00021274	-0.00128		125	0.01995	-4.80808e-05	-0.00759
65.5	0.01353	0.00229	-0.000748026	0.000592309		125.5	0.00684	-0.000134871	-0.00125		125.5	0.02038	0.000245546	-0.00755
66	0.0133	0.00206	-0.00123	0.00125		126	0.00699	0.000523519	-0.0016		126	0.02055	7.17212e-06	-0.00791
66.5	0.01346	0.00247	-0.000826682	0.000770103		126.5	0.00676	0.000174909	-0.00119		126.5	0.02045	3.47986e-05	-0.00761
67	0.01374	0.00211	-0.00093051	0.0007955		127	0.00728	0.000708299	-0.00154		127	0.02101	0.000195425	-0.00811
67.5	0.01364	0.00188	-0.000906338	0.0012		127.5	0.0073	0.000611689	-0.00138		127.5	0.02078	-0.000175949	-0.00781
68	0.01329	0.00191	-0.00139	0.0011		128	0.00707	0.000263078	-0.00135		128	0.02095	0.000117678	-0.0083
68.5	0.01408	0.00244	-0.000857995	0.000744691		128.5	0.00722	0.000292468	-0.00157		128.5	0.02151	-0.000253696	-0.008
69	0.01373	0.00196	-0.00134	0.000389088		129	0.00737	0.000196858	-0.00117		129	0.02128	-9.30692e-05	-0.00823
69.5	0.01427	0.0025	-0.000809651	0.000795485		129.5	0.00764	0.000351248	-0.00177		129.5	0.02158	6.75572e-05	-0.0082
70	0.01391	0.00227	-0.00129	0.000947882		130	0.00741	0.000380638	-0.00123		130	0.02201	-0.000303816	-0.00816
70.5	0.01458	0.00255	-0.000888307	0.000719279		130.5	0.0073	-9.29726e-05	-0.00183		130.5	0.02178	0.00012281	-0.00839
71	0.01422	0.00181	-0.00137	0.000617676		131	0.00783	0.000439417	-0.00142		131	0.02221	-0.000248563	-0.00809
71.5	0.01489	0.00209	-0.000966963	0.00128		131.5	0.00773	0.000217807	-0.00177		131.5	0.02238	4.5063e-05	-0.00859
72	0.01479	0.00224	-0.00158	0.00079547		132	0.00812	0.000373197	-0.00187		132	0.02228	-0.000193311	-0.00829
72.5	0.01482	0.00239	-0.00105	0.000820867		132.5	0.00739	0.000402587	-0.00146		132.5	0.02244	-0.000298684	-0.00865
73	0.0151	0.00229	-0.00128	0.000719264		133	0.00779	0.000179976	-0.00181		133	0.02301	-5.05771e-06	-0.00835
73.5	0.01488	0.00244	-0.00112	0.000998661		133.5	0.00756	0.000209366	-0.0014		133.5	0.02278	-0.000376431	-0.00858
74	0.01541	0.00273	-0.00135	0.000897059		134	0.00796	-1.32439e-05	-0.002		134	0.02308	-8.28048e-05	-0.00894
74.5	0.01532	0.0025	-0.0012	0.00118		134.5	0.00823	0.000142146	-0.00159		134.5	0.02337	-0.000321178	-0.00851
75	0.01572	0.00227	-0.00143	0.000693853		135	0.00775	0.000171536	-0.00143		135	0.02327	-2.75519e-05	-0.00901
75.5	0.0155	0.00191	-0.00115	0.00097325		135.5	0.00827	-0.000302074	-0.00178		135.5	0.02384	-0.000265926	-0.00884
76	0.01591	0.00245	-0.00151	0.000998647		136	0.00792	0.000482315	-0.00125		136	0.02401	-0.000238299	-0.00894
76.5	0.01543	0.00222	-0.00136	0.000897044		136.5	0.00819	0.000385705	-0.00159		136.5	0.02377	-7.76726e-05	-0.0089
77	0.01609	0.00237	-0.00134	0.000413441		137	0.00834	0.000289095	-0.00131		137	0.02421	-0.000316046	-0.009
77.5	0.01574	0.0024	-0.00144	0.000565838		137.5	0.00786	0.000444485	-0.00166		137.5	0.02411	-2.24197e-05	-0.00923
78	0.01628	0.00217	-0.00129	0.0011		138	0.00851	-0.000155125	-0.00163		138	0.0244	-0.000393793	-0.00893
78.5	0.01593	0.00207	-0.00139	0.000998632		138.5	0.00828	0.000377264	-0.00147		138.5	0.02457	-0.000100167	-0.00929
79	0.01646	0.00247	-0.00124	0.000261029		139	0.00842	2.96542e-05	-0.00182		139	0.02447	-7.25404e-05	-0.00912
79.5	0.01611	0.00224	-0.00147	0.00168		139.5	0.00819	0.000184044	-0.00129		139.5	0.02517	-0.000443914	-0.00949
80	0.01652	0.0024	-0.00119	0.000819823		140	0.00796	0.000339434	-0.00214		140	0.0252	-1.72875e-05	-0.00918
80.5	0.01629	0.00204	-0.00142	0.0011		140.5	0.00849	-8.17634e-06	-0.0016		140.5	0.0251	-0.000521661	-0.00928
81	0.0167	0.00207	-0.00127	0.000362617		141	0.00813	0.000147213	-0.00182		141	0.0254	-0.000228035	-0.00938
81.5	0.01648	0.00171	-0.00137	0.00115		141.5	0.00853	0.000176603	-0.00179		141.5	0.02517	-0.000333408	-0.00934
82	0.01689	0.00186	-0.00135	0.000667411		142	0.00843	-0.000172007	-0.00139		142	0.02534	-0.000438782	-0.00971
82.5	0.01704	0.00201	-0.00133	0.000565808		142.5	0.00845	0.000486383	-0.00199		142.5	0.02603	-0.000145155	-0.00954
83	0.01682	0.00242	-0.00143	0.000718205		143	0.00847	1.27727e-05	-0.00158		143	0.02607	-0.000649529	-0.00977
83.5	0.01723	0.00181	-0.00153	0.000997602		143.5	0.00887	0.000294163	-0.00205		143.5	0.0261	-8.99025e-05	-0.00987
84	0.01688	0.00222	-0.00151	0.000641999		144	0.00902	7.15523e-05	-0.00164		144	0.0264	-0.000594276	-0.00983
84.5	0.01741	0.00212	-0.00148	0.000667396		144.5	0.00841	-0.000277058	-0.00212		144.5	0.0263	-0.00030065	-0.01006
85	0.01719	0.00202	-0.00146	0.0012		145	0.00818	0.000507332	-0.00221		145	0.02647	-0.000273023	-0.00976
85.5	0.0176	0.00191	-0.00156	0.00123		145.5	0.00833	-9.22782e-05	-0.00193		145.5	0.0269	-0.000511397	-0.00999
86	0.01725	0.00219	-0.00154	0.000743588		146	0.00847	6.31116e-05	-0.0019		146	0.0268	-0.00021777	-0.00969
86.5	0.01778	0.00235	-0.00189	0.00102		146.5	0.00862	0.000344501	-0.00174		146.5	0.02723	-0.000589144	-0.00992
87	0.01743	0.00212	-0.00149	0.000413382		147	0.00826	-0.000130109	-0.00184		147	0.02753	-0.000295517	-0.01002
87.5	0.01797	0.00214	-0.00185	0.0012		147.5	0.00891	0.000529281	-0.00206		147.5	0.0273	-0.000533891	-0.00998
88	0.01761	0.00242	-0.00157	0.000464176		148	0.00868	0.000180671	-0.00165		148	0.0276	-0.000240264	-0.01021
88.5	0.0179	0.00181	-0.00193	0.000362573		148.5	0.00934	0.000210061	-0.00213		148.5	0.02776	-0.000212638	-0.01018
89	0.01805	0.00222	-0.00152	0.00038797		149	0.00936	0.00023945	-0.00184		149	0.02766	-0.000717012	-0.01054
89.5	0.0177	0.0025	-0.00188	0.000794367		149.5	0.00925	-0.00023416	-0.00244		149.5	0.02836	-0.000556385	-0.01024
90	0.01811	0.0024	-0.0016	0.000946764		150	0.00952	0.00017223	-0.00216		150	0.02839	-0.000528759	-0.0106
						150.5	0.00892	0.00032762	-0.00213		150.5	0.02829	-0.000634132	-0.01057
						151	0.00919	-0.00027199	-0.00223		151	0.02873	-0.000473506	-0.01067
						151.5	0.00896	0.0003864	-0.00194		151.5	0.02863	-0.000711879	-0.01076
						152	0.00974	-0.000213211	-0.00229		152	0.02879	-0.000285253	-0.01059
						152.5	0.00875	0.000319179	-0.00201		152.5	0.02923	-0.000656627	-0.01096
						153	0.0094	0.000222569	-0.00211		153	0.02952	-0.000363	-0.01066
						153.5	0.00942	-0.000125041	-0.00182		153.5	0.02916	-0.000468374	-0.01075
						154	0.00919	0.000281349	-0.00204		154	0.02972	-0.000440747	-0.01098
						154.5	0.00959	5.97384e-05	-0.00214		154.5	0.02962	-0.000413121	-0.01095
						155	0.00949	0.000340128	-0.00198		155	0.02966	-0.000784494	-0.01118
						155.5	0.00989	-7.48201e-06	-0.00233		155.5	0.03022	-0.000357868	-0.01088
						156	0.00991	-0.000104092	-0.00218		156	0.02999	-0.000729241	-0.01138
						156.5	0.00993	0.000428298	-0.00202		156.5	0.03016	-0.000568615	-0.01094
						157	0.00995	8.06874e-05	-0.00212		157	0.03059	-0.000806989	-0.01157
						157.5	0.00972	0.000362077	-0.00171		157.5	0.03036	-0.000646362	-0.01127
						158	0.0105	0.000139467	-0.00231		158	0.03079	-0.000618736	-0.01137
						158.5	0.00976	0.000168857	-0.00177		158.5	0.03095	-0.000724109	-0.01146
						159	0.01029	0.000701247	-0.00199		159	0.03085	-0.000430483	-0.0113
						159.5	0.00993	0.000479636	-0.00184		159.5	0.03129	-0.000535856	-0.01166
						160	0.00995	0.000257026	-0.00231		160	0.03132	-0.00037523	-0.01136
						160.5	0.01035	0.000412416	-0.00203		160.5	0.03135	-0.000480603	-0.01172
						161	0.00987	0.000189806	-0.002		161	0.03178	-0.000452977	-0.01142
						161.5	0.01052	0.000597196	-0.00209		161.5	0.03195	-0.000425351	-0.01178
						162	0.01016	0.000626586	-0.00194		162	0.03185	-0.000796724	-0.01175
						162.5	0.01019	0.000403975	-0.00241		162.5	0.03228	-0.000503098	-0.01158
						163	0.01046	0.000433365	-0.00213		163	0.03218	-0.000874471	-0.01194
						163.5	0.01035	0.000210755	-0.00197		163.5	0.03235	-0.000713845	-0.01177
						164	0.01075	0.000366145	-0.00219		164	0.03278	-0.000952218	-0.01201
						164.5	0.01027	0.000143535	-0.00179		164.5	0.03255	-0.000525592	-0.0121
						165	0.01042	0.000424924	-0.00251		165	0.03285	-0.000896966	-0.01193
						165.5	0.01069	0.000328314	-0.00198		165.5	0.03301	-0.000736339	-0.0123
						166	0.01046	0.000105704	-0.00233		166	0.03305	-0.000708713	-0.012
						166.5	0.01074	0.000387094	-0.0023		166.5	0.03348	-0.000814086	-0.01236
						167	0.01013	0.000416484	-0.00201		167	0.03325	-0.00052046	-0.01206
						167.5	0.01053	0.000571873	-0.00223		167.5	0.03368	-0.000891833	-0.01229
						168	0.01093	0.000475263	-0.00195		168	0.03385	-0.000731207	-0.01225
						168.5	0.01057	0.000252653	-0.00243		168.5	0.03375	-0.00070358	-0.01222
						169	0.01109	0.000534043	-0.00202		169	0.03431	-0.000808954	-0.01258
						169.5	0.01036	0.000437433	-0.00211		169.5	0.03408	-0.000648328	-0.01228
						170	0.01114	0.000215823	-0.00234		170	0.03451	-0.00102	-0.01278
						170.5	0.01078	0.000496212	-0.00205		170.5	0.03481	-0.000593075	-0.01234
						171	0.01105	0.000274602	-0.0024		171	0.03458	-0.0011	-0.01271
						171.5	0.0107	0.000680992	-0.00174		171.5	0.03488	-0.000670822	-0.01267
						172	0.01085	0.000836382	-0.00247		172	0.03531	-0.000909195	-0.0125
						172.5	0.01137	0.000487772	-0.00193		172.5	0.03521	-0.000748569	-0.01287
						173	0.01089	0.000769161	-0.00203		173	0.03564	-0.000720942	-0.0127
						173.5	0.01141	4.35512e-05	-0.002		173.5	0.03554	-0.000959316	-0.0128
						174	0.01131	0.000575941	-0.00197		174	0.03571	-0.00066569	-0.01289
						174.5	0.0107	0.000228331	-0.00231		174.5	0.03614	-0.00104	-0.01273
						175	0.01148	0.000257721	-0.00216		175	0.03591	-0.000610437	-0.01322
						175.5	0.01125	0.00028711	-0.00213		175.5	0.03634	-0.00112	-0.01292
						176	0.01139	0.0003165	-0.00222		176	0.03637	-0.000688184	-0.01328
						176.5	0.01141	0.00059789	-0.00219		176.5	0.03627	-0.00106	-0.01298
						177	0.01144	0.00037528	-0.00254		177	0.03684	-0.000898931	-0.01295
						177.5	0.01146	0.00090767	-0.00213		177.5	0.03674	-0.000871304	-0.01331
						178	0.01148	0.000308059	-0.00235		178	0.03717	-0.00111	-0.01301
						178.5	0.01188	0.000211449	-0.00232		178.5	0.03734	-0.00108	-0.01351
						179	0.0114	0.000744839	-0.00242		179	0.03724	-0.00119	-0.01334
						179.5	0.01142	0.000396229	-0.00239		179.5	0.03753	-0.00116	-0.01357
						180	0.01144	0.000299619	-0.00223		180	0.0373	-0.001	-0.01367
						180.5	0.01159	0.000329009	-0.00245		180.5	0.0376	-0.00124	-0.01363
						181	0.01186	0.000107398	-0.00192		181	0.03803	-0.000944919	-0.01373
						181.5	0.01176	0.000513788	-0.00239		181.5	0.03807	-0.00118	-0.01356
						182	0.0119	0.000417178	-0.00236		182	0.03837	-0.000889667	-0.01379
						182.5	0.0118	0.000446568	-0.00208		182.5	0.03853	-0.00113	-0.01349
						183	0.0122	0.000224958	-0.00243		183	0.03843	-0.000834414	-0.01359
						183.5	0.01222	0.000379347	-0.0019		183.5	0.03886	-0.000939787	-0.01382
						184	0.01161	0.000660737	-0.00237		184	0.03863	-0.000912161	-0.01365
						184.5	0.01226	0.000564127	-0.00246		184.5	0.03893	-0.000884534	-0.01401
						185	0.01203	0.000593517	-0.00206		185	0.0391	-0.000989908	-0.01384
						185.5	0.0123	0.000119907	-0.00215		185.5	0.039	-0.000829281	-0.01407
						186	0.0122	0.000652296	-0.002		186	0.03956	-0.0012	-0.01404
						186.5	0.0121	0.000430686	-0.00234		186.5	0.0396	-0.000907029	-0.01427
						187	0.01212	0.000585076	-0.00194		187	0.0399	-0.00128	-0.01423
						187.5	0.01189	0.000363466	-0.00216		187.5	0.04006	-0.00112	-0.01407
						188	0.01266	1.48557e-05	-0.00225		188	0.03996	-0.00109	-0.0143
						188.5	0.01218	0.000296246	-0.00197		188.5	0.04039	-0.00133	-0.01399
						189	0.01271	0.000451635	-0.00244		189	0.04016	-0.000901896	-0.01436
						189.5	0.0121	0.000355025	-0.00204		189.5	0.04033	-0.00141	-0.01406
						190	0.01225	0.000384415	-0.00251		190	0.04049	-0.000846643	-0.01429
						190.5	0.01277	0.000161805	-0.00248		190.5	0.04066	-0.00122	-0.01412
						191	0.01241	0.000569195	-0.00245		191	0.04109	-0.000924391	-0.01448
						191.5	0.01319	0.000472584	-0.00254		191.5	0.04099	-0.00116	-0.01431
						192	0.01208	0.000753974	-0.00214		192	0.04116	-0.00114	-0.01428
						192.5	0.01298	0.000657364	-0.00236		192.5	0.04146	-0.000974511	-0.01464
						193	0.01313	0.000182754	-0.00208		193	0.04136	-0.00121	-0.01421
						193.5	0.01265	0.000464144	-0.0023		193.5	0.04206	-0.00105	-0.0147
						194	0.0133	0.000367533	-0.00227		194	0.04182	-0.00129	-0.01454
						194.5	0.01244	0.000900923	-0.00198		194.5	0.04212	-0.000997006	-0.01463
						195	0.01334	0.000300313	-0.00271		195	0.04229	-0.00137	-0.01473
						195.5	0.01311	0.000581703	-0.00205		195.5	0.04206	-0.000941753	-0.01456
						196	0.01313	0.000611093	-0.00252		196	0.04262	-0.00145	-0.01493
						196.5	0.01303	0.000514482	-0.00199		196.5	0.04239	-0.00115	-0.01463
						197	0.01292	0.000795872	-0.00246		197	0.04269	-0.00139	-0.01512
						197.5	0.01345	0.000447262	-0.00231		197.5	0.04299	-0.0015	-0.01469
						198	0.01297	0.000728652	-0.00202		198	0.04289	-0.00107	-0.01505
						198.5	0.01336	0.000381042	-0.00237		198.5	0.04332	-0.00144	-0.01488
						199	0.01301	0.000661432	-0.00209		199	0.04309	-0.00115	-0.01498
						199.5	0.01316	0.000690821	-0.00244		199.5	0.04365	-0.00152	-0.01494
						200	0.01355	0.000217211	-0.0019		200	0.04355	-0.00123	-0.01478
						200.5	0.01345	0.000623601	-0.00213		200.5	0.04358	-0.00133	-0.01514
						201	0.01385	0.000652991	-0.00235		201	0.04402	-0.00144	-0.01497
						201.5	0.01312	0.000557381	-0.00194		201.5	0.04392	-0.00128	-0.01547
						202	0.01364	0.00083777	-0.00241		202	0.04408	-0.00151	-0.01517
						202.5	0.01354	0.00036416	-0.00175		202.5	0.04438	-0.00109	-0.01513
						203	0.01356	0.00089655	-0.00248		203	0.04428	-0.00159	-0.01536
						203.5	0.01396	0.00092594	-0.00182		203.5	0.04485	-0.00103	-0.01519
						204	0.01398	0.00108	-0.00191		204	0.04461	-0.0014	-0.01556
						204.5	0.01375	0.000733719	-0.00226		204.5	0.04478	-0.00111	-0.01512
						205	0.0139	0.000763109	-0.00185		205	0.04495	-0.00148	-0.01562
						205.5	0.01404	0.000917499	-0.00233		205.5	0.04498	-0.00105	-0.01532
						206	0.01419	0.000443889	-0.00192		206	0.04541	-0.00143	-0.01568
						206.5	0.01396	0.000851279	-0.00214		206.5	0.04518	-0.00126	-0.01551
						207	0.01398	0.000376669	-0.00223		207	0.04561	-0.00137	-0.01548
						207.5	0.01375	0.000532058	-0.0022		207.5	0.04565	-0.00148	-0.01571
						208	0.01415	0.000687448	-0.00243		208	0.04555	-0.00105	-0.01541
						208.5	0.01417	0.000842838	-0.00189		208.5	0.04611	-0.00142	-0.0159
						209	0.01407	0.00112	-0.00249		209	0.04601	-0.00113	-0.01547
						209.5	0.01434	0.000901618	-0.00221		209.5	0.04631	-0.0015	-0.01597
						210	0.01386	0.000679007	-0.00218		210	0.04608	-0.000805586	-0.01553

## Sheet: WL C. thermalis
	Acceptors	DCMU	DCMU+His
0	0.000151313	-9.15593e-05	0.000343348
0.5	-0.000450206	-6.78219e-05	-1.12899e-05
1	0.000208275	-0.000170084	0.000515072
1.5	0.000236757	0.000105653	-9.0566e-05
2	-0.000364762	-0.00024861	0.000561796
2.5	0.000293719	-9.88722e-05	8.21579e-05
3	-0.0003078	0.000176865	0.00010552
3.5	-0.000530319	-5.13973e-05	0.000254882
4	0.000127162	0.00035034	-9.97562e-05
4.5	2.96436e-05	-0.000254922	0.000301606
5	-6.78752e-05	1.9815e-05	-0.000178032
5.5	-0.000290394	0.000169552	0.00022233
6	0.000241087	-0.00018371	-6.30835e-06
6.5	1.75683e-05	0.000343027	-0.000233946
7	-7.99506e-05	-1.12353e-05	0.000292416
7.5	0.000452531	1.25021e-05	-6.12225e-05
8	-0.000273988	3.62396e-05	0.000465139
8.5	0.000131493	-0.000317023	-0.000140499
9	-0.000217026	8.37144e-05	0.000259863
9.5	0.000188455	-0.000269548	0.000157225
10	9.09364e-05	-0.000245811	-7.04127e-05
10.5	0.000245418	2.99267e-05	0.000329949
11	0.000273899	-0.000198336	0.000102311
11.5	-0.00032662	0.000328402	0.000125673
12	-4.61389e-05	-0.000150861	2.30351e-05
12.5	-0.000269658	-0.000253124	4.63971e-05
13	0.000261823	2.26139e-05	0.000572759
13.5	-0.000338695	-0.000331649	-3.2879e-05
14	-0.000184214	0.000321089	0.000367483
14.5	0.000222267	-0.000284174	0.000139845
15	-0.000127252	0.000117564	0.000289207
15.5	0.000153229	1.5301e-05	0.000563569
16	-0.00019629	-0.000212962	-4.20692e-05
16.5	-0.000293808	0.000314776	-1.87072e-05
17	0.000364673	-3.94867e-05	4.65471e-06
17.5	-0.000110846	0.000110251	-9.79833e-05
18	-0.000333365	-0.000369012	0.000429379
18.5	-5.38838e-05	-0.000345274	0.000326741
19	-2.54026e-05	0.000181463	0.000224103
19.5	-0.000122921	-4.67996e-05	0.000247465
20	-0.00059744	-0.000274062	0.000396826
20.5	-0.000190959	6.75301e-07	0.000294188
21	-0.000792478	-0.000604587	-6.04496e-05
21.5	-0.000133997	4.81502e-05	0.000340912
22	1.94843e-05	7.18876e-05	-0.000138726
22.5	-0.000707034	-0.000281375	0.000261636
23	0.000202447	0.000119362	-0.000218002
23.5	0.000104928	-0.0004859	-0.00019464
24	-0.000369591	-8.41627e-05	-4.52779e-05
24.5	0.00016189	-0.000186425	-0.000273916
25	-6.06287e-05	-3.66878e-05	0.000378446
25.5	-0.000158148	0.00011205	0.000275808
26	-0.000129666	-0.000493213	-0.00020383
26.5	2.48148e-05	0.000285524	0.000322532
27	-0.000701704	-6.77381e-05	-0.000409106
27.5	-0.000170223	-4.40007e-05	0.000369256
28	0.000487258	0.000105737	0.000266618
28.5	-0.000616261	-0.000122526	0.00028998
29	0.000293221	-9.87884e-05	0.000313342
29.5	6.97018e-05	5.0949e-05	-4.02963e-05
30	-2.7817e-05	-0.000177314	0.000235066
30.5	6.64138e-07	9.84239e-05	6.42757e-06
31	0.000155145	-0.000129839	0.00053279
31.5	0.000183626	0.000396899	-0.000198849
32	-0.000290892	0.000546636	0.000328513
32.5	0.000366589	-0.000184626	0.000225875
33	1.707e-05	0.000217111	0.000249237
33.5	-0.000457449	-0.000388152	0.000649599
34	0.000452032	0.000264586	4.39613e-05
34.5	-2.34865e-05	0.000162323	0.000319323
35	-0.000246005	-0.000316939	9.06852e-05
35.5	0.000285476	8.37982e-05	-0.000137953
36	-0.000189043	-0.000395464	0.000640409
36.5	9.04381e-05	0.000257273	-9.12289e-05
37	-6.08073e-06	2.90105e-05	0.000184133
37.5	0.0002734	-0.000198252	8.1495e-05
38	-0.000201118	0.000328485	-0.000272143
38.5	-4.66372e-05	-0.000150777	0.000380219
39	-0.000144156	0.00024996	2.55809e-05
39.5	-0.000619675	0.000273698	0.000174943
40	0.000164806	-0.000205565	-0.000304695
40.5	-0.000436713	0.000195172	-3.03333e-05
41	-0.000534231	-0.00015809	-6.97132e-06
41.5	-1.75025e-06	0.000368647	-0.000108609
42	-0.000351269	-0.000110615	0.000291753
42.5	-0.000573788	0.000290122	-0.000439885
43	0.000209693	6.28596e-05	0.000212477
43.5	-0.000265826	8.65971e-05	-1.51615e-05
44	-0.000237344	0.000110334	0.0002592
44.5	-0.000585863	8.07191e-06	0.000282562
45	-0.000306382	0.000408809	-7.10757e-05
45.5	-0.000402901	-7.04532e-05	0.000203286
46	-0.00050042	7.92842e-05	0.000101648
46.5	3.10614e-05	0.000103022	-9.89785e-07
47	-0.000569457	0.000126759	0.000273372
47.5	8.80237e-05	0.000527496	-0.000206266
48	-0.000260495	4.82339e-05	6.90961e-05
48.5	1.8986e-05	-0.000180029	-0.000159542
49	0.000425467	0.000472709	-1.018e-05
49.5	-0.000175052	-0.000258554	1.3182e-05
50	0.00048243	0.000269184	-0.000341456
50.5	-0.000496089	0.000166921	5.99059e-05
51	-8.96081e-05	-0.000313342	-0.000168732
51.5	0.000189873	0.000214396	0.00010663
52	-0.000536646	-0.000265867	0.000129992
52.5	0.000372835	0.000261871	0.000153354
53	0.000401317	0.000159608	0.000176716
53.5	-0.000325202	-6.86544e-05	-0.000177922
54	0.000332279	8.10831e-05	9.74396e-05
54.5	-0.00014224	-2.11795e-05	-0.000131198
55	0.000389241	0.000254558	0.000144163
55.5	-0.000463278	2.62954e-05	4.15255e-05
56	6.92035e-05	0.000176033	-0.000186113
56.5	-0.000280315	0.00019977	0.000340249
57	-0.000251834	-0.000153492	-0.000139389
57.5	0.000280647	0.000121245	-0.000116027
58	5.71282e-05	1.89825e-05	0.000158335
58.5	8.56093e-05	4.27199e-05	-0.000195303
59	0.00024009	0.000444457	7.90592e-05
59.5	0.000142572	9.01948e-05	-0.000148579
60	0.000297053	0.000113932	-0.000125217
60.5	0.000325534	-0.00011333	-0.000227855
61	0.000354015	-0.000341593	-0.000330493
61.5	-0.000498504	0.000311145	7.08689e-05
62	0.000536977	-0.000546118	9.42309e-05
62.5	0.000313459	-0.000270381	0.000368593
63	-0.00016106	-0.000372643	0.000140955
63.5	0.000370421	-0.000348906	0.000164317
64	0.000146902	0.000178832	6.16787e-05
64.5	0.000301383	-0.000175431	8.50407e-05
65	-0.000173136	0.000477307	0.000485403
65.5	0.000610346	0.000250044	0.000131765
66	9.8268e-06	2.17814e-05	2.91266e-05
66.5	0.000163308	0.000297519	0.000304489
67	0.000569789	-0.000308744	-0.00055315
67.5	0.00047227	-0.000536006	9.92124e-05
68	0.000374751	-9.2689e-06	-0.000255426
68.5	0.000529233	-0.000488531	-0.000232064
69	0.000683714	3.8206e-05	-0.000208702
69.5	0.000209195	-0.000441057	-0.00043634
70	0.000740676	-4.03192e-05	-3.59778e-05
70.5	0.00102	0.000235418	-0.000263616
71	0.000419638	0.000133156	0.000262746
71.5	0.00095212	-9.51069e-05	3.41081e-05
72	0.000980601	-0.000574369	-6.85299e-05
72.5	0.00114	-0.000424632	8.0832e-05
73	0.00116	-2.38946e-05	-0.000146806
73.5	0.00119	-0.000377157	0.000379556
74	0.00185	0.00014958	-0.000100082
74.5	0.00112	-0.000581682	0.00042628
75	0.00153	0.000323055	0.000197642
75.5	0.00143	-3.02075e-05	-0.000281996
76	0.00108	-6.47003e-06	0.000244366
76.5	0.00187	0.000142267	1.67277e-05
77	0.00152	-0.000210995	-8.59104e-05
77.5	0.0018	0.000315742	6.34516e-05
78	0.00157	0.00033948	-3.91865e-05
78.5	0.00198	-1.37829e-05	0.000235176
79	0.00176	0.000512955	7.53746e-06
79.5	0.00178	-9.2308e-05	0.000533899
80	0.00232	0.000686429	5.42614e-05
80.5	0.00209	8.11668e-05	-4.83767e-05
81	0.00212	-0.000147096	0.000100985
81.5	0.0024	0.000128642	-0.000379653
82	0.00231	-9.96209e-05	0.000147709
82.5	0.00233	0.000553117	-0.000332929
83	0.00236	-5.2146e-05	-5.75669e-05
83.5	0.00239	9.75914e-05	-0.000160205
84	0.00229	-4.67116e-06	-0.000388843
84.5	0.0027	0.000145066	0.000138519
85	0.00248	0.000420804	3.5881e-05
85.5	0.0025	-5.94589e-05	-0.000443757
86	0.00304	0.000216279	-4.33951e-05
86.5	0.00231	0.000366016	-0.000397033
87	0.00272	1.17534e-05	0.000255329
87.5	0.003	0.000161491	2.66907e-05
88	0.00277	-6.67717e-05	-7.59473e-05
88.5	0.00293	0.000208966	7.34147e-05
89	0.0027	0.000484703	-0.000155223
89.5	0.00324	4.44056e-06	-5.86143e-06
90	0.00263	0.000280178	1.75005e-05
90.5	0.00292	5.19154e-05	-0.000210138
91	0.00257	0.000327653	-0.000186776
91.5	0.00297	0.00060339	-0.000415414
92	0.0035	0.000249128	0.000110948
92.5	0.00316	0.000650865	-0.00011669
93	0.00293	0.000170603	3.16723e-05
93.5	0.00346	0.00069834	-0.000195966
94	0.00362	0.000596077	7.83962e-05
94.5	0.00365	0.000241815	0.000101758
95	0.00367	0.000769552	-0.00025188
95.5	0.00333	0.00041529	0.000148482
96	0.00335	0.000565027	-0.000331156
96.5	0.00338	0.00109	-0.000307794
97	0.00366	0.000360502	9.35679e-05
97.5	0.00369	0.000636239	-0.00013507
98	0.00359	0.000407977	0.000265292
98.5	0.0035	0.000683714	3.76538e-05
99	0.00378	0.000581452	0.000187016
99.5	0.0033	0.000228189	0.000210378
100	0.00396	0.000377927	-1.82603e-05
100.5	0.00386	0.000275664	0.000382102
101	0.00339	0.000425401	-0.000223536
101.5	0.00379	0.000323139	5.18256e-05
102	0.00395	-3.11237e-05	-0.000302812
102.5	0.00372	0.000496614	-2.74505e-05
103	0.00426	0.000520351	-0.000130089
103.5	0.00391	0.000418089	-0.000232727
104	0.00394	0.000189826	-8.33647e-05
104.5	0.00384	8.75634e-05	-0.000311003
105	0.0045	0.000615301	-3.66407e-05
105.5	0.00352	9.0383e-06	-1.32788e-05
106	0.00392	3.27757e-05	-0.000492917
106.5	0.00408	-6.94868e-05	-0.000217555
107	0.00398	0.000206251	-0.000698193
107.5	0.00439	0.000481988	8.0169e-05
108	0.00416	0.000127725	-0.000147469
108.5	0.00419	0.000403463	-0.000124107
109	0.00372	-7.57997e-05	2.42549e-05
109.5	0.0045	0.000702938	-0.000329383
110	0.0044	0.000348675	7.09788e-05
110.5	0.00418	-4.5874e-06	-0.000282659
111	0.00471	0.00052215	0.000369703
111.5	0.00386	0.000167887	-0.000235935
112	0.00452	0.000569625	-0.000212573
112.5	0.00467	9.03623e-05	-6.32114e-05
113	0.00407	0.0002391	-0.000543849
113.5	0.00448	0.000514837	-1.64875e-05
114	0.00451	3.55746e-05	-0.000622126
114.5	0.00516	0.000436312	-0.000598764
115	0.00418	8.30495e-05	-0.000324402
115.5	0.00497	0.000609787	-0.00055204
116	0.00512	0.000633524	-0.000277678
116.5	0.00427	0.000405262	-0.000757316
117	0.00518	0.000554999	-0.000230954
117.5	0.00483	0.000201737	-0.000207592
118	0.00498	0.000476474	-0.00056123
118.5	0.00464	0.000878211	-0.000286868
119	0.00504	0.000523949	-0.000640506
119.5	0.00469	0.000673686	-0.000240144
120	0.00447	6.84238e-05	-0.000719782
120.5	0.005	0.000344161	-0.00031842
121	0.0044	0.000618899	-0.000421058
121.5	0.00468	1.3636e-05	-0.000649696
122	0.00521	0.000289373	-0.000374334
122.5	0.00474	-0.000189889	-0.000728972
123	0.00502	0.000462848	-0.00045361
123.5	0.00492	0.000108586	-0.000430248
124	0.00507	6.32319e-06	-0.000532886
124.5	0.00473	0.000156061	-0.000131524
125	0.00488	-0.000197202	-0.000360162
125.5	0.00529	0.000581535	4.01995e-05
126	0.00481	0.000353273	-0.000439439
126.5	0.00547	0.00012501	-3.80766e-05
127	0.00537	0.000400748	-0.000392715
127.5	0.00515	0.000172485	-0.000495353
128	0.00543	-5.47774e-05	-0.000219991
128.5	0.00558	-3.10399e-05	-0.000825629
129	0.00536	-0.000385303	-0.000299267
129.5	0.00488	1.64349e-05	-0.000778905
130	0.00554	-0.000211828	-0.000630543
130.5	0.00519	0.00018991	-0.000355181
131	0.00484	8.76472e-05	-0.000331819
131.5	0.00575	-0.000392615	-0.000434457
132	0.00553	9.12206e-06	-0.000537095
132.5	0.00581	-0.000219141	-0.000261733
133	0.00584	-6.94031e-05	-0.000364371
133.5	0.00574	-0.000171666	-0.000341009
134	0.00552	-2.19282e-05	-6.56472e-05
134.5	0.00555	0.000379809	-0.000671285
135	0.00608	0.000151547	-0.000521923
135.5	0.0051	0.000175284	-0.000624561
136	0.00588	0.000325021	-0.000601199
136.5	0.00554	9.67589e-05	-0.000451837
137	0.00531	0.000372496	-0.000554475
137.5	0.00584	0.000522234	-0.000531113
138	0.00562	0.000545971	-0.000759752
138.5	0.00615	0.000443709	-0.00048439
139	0.00568	0.000341446	-0.000713028
139.5	0.00571	0.000617184	-0.000563666
140	0.00574	0.000514921	-0.000666304
140.5	0.00589	0.000915658	-0.000768942
141	0.00604	0.000184396	-0.00036758
141.5	0.00595	0.000460133	-0.000848218
142	0.00648	0.000357871	-0.000194856
142.5	0.00575	0.000507608	-0.000423494
143	0.00628	0.00103	-0.000526132
143.5	0.00619	0.000303083	-0.00037677
144	0.00571	0.00083082	-0.000731408
144.5	0.00649	0.000728558	-0.000330046
145	0.00589	0.000626295	-0.000558684
145.5	0.00617	0.000776033	-0.000409322
146	0.00633	4.47701e-05	-0.00051196
146.5	0.00598	0.000445508	-0.000865598
147	0.00601	0.000469245	-0.000591236
147.5	0.00591	0.000366982	-0.000944874
148	0.00644	0.00064272	-0.000418512
148.5	0.00597	0.000289457	-0.00077215
149	0.00587	0.000438195	-0.000874788
149.5	0.00615	0.000210932	-0.000474427
150	0.00605	0.00061167	-0.000954065
150.5	0.00633	0.000384407	-0.000175703
151	0.00573	-9.58556e-05	-0.000907341
151.5	0.00626	0.000556882	-0.000757979
152	0.00654	0.000329619	-0.000860617
152.5	0.00607	0.000730357	-0.000711255
153	0.00648	-9.05904e-07	-0.000310893
153.5	0.00625	0.000526832	-0.000412531
154	0.00691	0.000550569	-0.000641169
154.5	0.00681	0.000196306	-0.000617807
155	0.00646	0.000598044	-0.000720445
155.5	0.00649	0.000117781	-0.000697083
156	0.00652	0.000267519	-0.000799721
156.5	0.00718	0.000543256	-0.000398359
157	0.00658	6.29935e-05	-0.001
157.5	0.00698	0.000464731	-0.000603635
158	0.00651	-1.45316e-05	-0.000832273
158.5	0.00666	0.000638206	-0.000933911
159	0.00707	0.000157943	-0.000281549
159.5	0.00647	0.000181681	-0.00101
160	0.00637	0.000457418	-0.000486825
160.5	0.0069	0.000104156	-0.000589463
161	0.00668	0.000630893	-0.000440101
161.5	0.00671	0.00015163	-0.00041674
162	0.00699	0.000678368	-0.000770378
162.5	0.00689	7.31053e-05	-0.000496016
163	0.00692	0.000347843	-0.000849654
163.5	0.00682	0.00074958	-0.000952292
164	0.00748	1.83175e-05	-0.00055193
164.5	0.00675	0.000294055	-0.000653568
165	0.00716	0.000191792	-0.000505206
165.5	0.00744	0.00046653	-0.000858844
166	0.00659	0.000365267	-0.000458482
166.5	0.00724	0.000137005	-0.00043512
167	0.0069	0.000286742	-0.000411758
167.5	0.00667	0.00018448	-0.000388396
168	0.0072	8.2217e-05	-0.000868034
168.5	0.00698	-0.000146046	-0.000592672
169	0.00726	3.69184e-06	-0.00082131
169.5	0.00716	0.000153429	-0.000797948
170	0.00719	5.11667e-05	-0.000774586
170.5	0.00772	0.000326904	-0.001
171	0.00763	-0.000153358	-0.000727862
171.5	0.00715	0.000374379	-0.00121
172	0.00718	0.000398116	-0.000807138
172.5	0.00721	0.000169854	-0.00104
173	0.00711	0.000193591	-0.000886415
173.5	0.00727	-3.46713e-05	-0.000611053
174	0.00767	0.000619066	-0.000839691
174.5	0.0072	0.000516804	-0.000564329
175	0.00773	0.000162541	-0.00104
175.5	0.00738	0.000690278	-0.000391605
176	0.00703	-4.09842e-05	-0.000997243
176.5	0.00781	0.000863753	-0.000848881
177	0.00721	0.000509491	-0.000699519
177.5	0.00749	0.000533228	-0.00105
178	0.0074	0.000304966	-0.000652795
178.5	0.0078	0.000328703	-0.00113
179	0.00733	0.00073044	-0.000606071
179.5	0.00736	-8.22145e-07	-0.000708709
180	0.00764	0.000525915	-0.000685347
180.5	0.00729	4.66527e-05	-0.000661985
181	0.00744	0.00019639	-0.000889623
181.5	0.00785	-3.18724e-05	-0.000615261
182	0.00712	0.000243865	-0.00109
182.5	0.00803	0.000518602	-0.000945537
183	0.00781	-8.66601e-05	-0.000922175
183.5	0.00721	0.000944077	-0.00115
184	0.00812	0.000212815	-0.000749451
184.5	0.00739	0.000236552	-0.00123
185	0.00792	0.00038629	-0.000325728
185.5	0.00782	0.000284027	-0.000931366
186	0.00798	0.000558764	-0.000782004
186.5	0.00788	0.000205502	-0.000632642
187	0.00778	0.000355239	-0.00073528
187.5	0.00844	0.000504977	-0.000208918
188	0.00771	0.000402714	-0.000562556
188.5	0.00799	0.000552452	-0.000413194
189	0.00802	-0.000178811	-0.000893832
189.5	0.00805	0.000599926	-0.00074447
190	0.0077	0.000119664	-0.000469108
190.5	0.00811	0.000647401	-0.000697746
191	0.00789	0.000922139	-0.000548384
191.5	0.00791	6.48762e-05	-0.000777022
192	0.00756	0.000466614	-0.00037566
192.5	0.0081	0.000112351	-0.000604298
193	0.00812	0.000766088	-0.000957936
193.5	0.00778	0.000663826	-0.000557574
194	0.00818	0.000309563	-0.000786212
194.5	0.00796	0.000962301	-0.00076285
195	0.00799	0.000357038	-0.000739488
195.5	0.00814	0.00101	-0.000590126
196	0.00817	0.000530513	-0.000943764
196.5	0.0087	0.00030225	-0.000794402
197	0.00785	0.000703988	-0.000771041
197.5	0.00813	-2.72747e-05	-0.000873679
198	0.00853	0.000373463	-0.000850317
198.5	0.00781	2.02002e-05	-0.0012
199	0.00834	0.000546938	-0.00106
199.5	0.00824	0.000570675	-0.000780231
200	0.00802	0.000217412	-0.00101
200.5	0.0083	0.00049215	-0.000985507
201	0.00845	0.000138887	-0.00109
201.5	0.00823	0.000791625	-0.00106
202	0.00851	0.000438362	-0.000915421
202.5	0.00841	0.0008391	-0.000514059
203	0.00857	0.000610837	-0.000490697
203.5	0.00809	0.000634574	-0.000845335
204	0.00875	0.000910312	-0.000569973
204.5	0.00828	0.00106	-0.00118
205	0.00843	0.00121	-0.000649249
205.5	0.00884	0.00111	-0.000751887
206	0.00811	0.000753262	-0.00111
206.5	0.00877	0.00103	-0.000957163
207	0.00842	0.000675736	-0.00106
207.5	0.00857	0.000950474	-0.000658439
208	0.00898	0.000345211	-0.000887077
208.5	0.00838	0.000620949	-0.000485716
209	0.00841	0.000895686	-0.000965354
209.5	0.00906	0.000668424	-0.000564992
210	0.00872	0.000692161	-0.00079363
