# Supplementary material for: Impact of energy limitations on function and resilience in long-wavelength Photosystem II
Source: eLife. 2022 Jul 19;11:e79890. doi: 10.7554/eLife.79890 (PMC9439682; doi:10.7554/eLife.79890)
Supplement: Figure 2—source data 1. [file elife-79890-fig2-data1.xlsx]

## Sheet: Sheet1
A. marina								WL C. thermalis								FR C. thermalis
	Control 1	Control 2	Control 3	DCMU 1	DCMU 2	DCMU 3			Control 1	Control 2	Control 3	DCMU 1	DCMU 2	DCMU 3			Control 1	Control 2	Control 3	DCMU 1	DCMU 2	DCMU 3
0.0011858	1	1	1	1	1	1		0.0011858	1	1	1	1	1	1		0.0011858	1	1	1	1	1	1
0.0013242	0.935534	0.935395	0.939224	0.935555	0.943619	0.964685		0.0013242	0.885682	0.958904	0.901809	0.999039	0.991947	0.99524		0.0013242	0.901995	0.961431	0.912653	0.978567	0.992982	0.980324
0.0015703	0.883971	0.874932	0.877133	0.951867	0.966792	1.00326		0.0015703	0.818089	0.826389	0.838769	0.962281	0.975887	0.991567		0.0015703	0.847139	0.86761	0.858016	0.978263	0.980006	0.939019
0.002008	0.840721	0.75255	0.804366	0.953011	0.984598	0.991542		0.002008	0.706284	0.721003	0.709287	0.9664	0.951636	1.01151		0.002008	0.717935	0.755596	0.806019	0.943037	0.991389	0.965635
0.0027863	0.731325	0.66222	0.765943	0.975552	0.982329	1.01352		0.0027863	0.597513	0.626071	0.627457	0.936849	0.982182	1.00592		0.0027863	0.607736	0.708328	0.719077	0.949866	0.965969	0.977604
0.0041703	0.686849	0.613074	0.641216	0.966273	0.994971	1.02494		0.0041703	0.537939	0.492033	0.521591	0.944091	0.940667	1.00464		0.0041703	0.471296	0.593745	0.601298	0.956323	0.938486	0.98837
0.0066314	0.561961	0.535456	0.554048	0.955384	0.984041	1.00598		0.0066314	0.438146	0.435065	0.425099	0.890309	0.938076	0.985045		0.0066314	0.375297	0.519209	0.506036	0.921402	0.944383	0.92136
0.011008	0.528388	0.453271	0.478496	0.960003	0.974439	1.00542		0.011008	0.377575	0.345127	0.365489	0.876512	0.949507	0.959036		0.011008	0.291219	0.403203	0.41333	0.917007	0.938957	0.921982
0.0187908	0.497132	0.43151	0.409177	1.005	0.965395	0.999965		0.0187908	0.345733	0.338906	0.314001	0.926518	0.930069	0.981994		0.0187908	0.241897	0.333382	0.340245	0.937121	0.933001	0.9059
0.0326308	0.423535	0.367672	0.363122	0.971654	0.972241	0.997047		0.0326308	0.31868	0.294762	0.316925	0.88245	0.926228	0.970171		0.0326308	0.20629	0.326105	0.288662	0.934079	0.940019	0.933372
0.0572421	0.421445	0.374125	0.318921	0.957715	1.03988	0.993916		0.0572421	0.296495	0.276944	0.255243	0.859832	0.938122	0.942736		0.0572421	0.188172	0.258468	0.259894	0.932794	0.947627	0.882232
0.101008	0.335764	0.292131	0.283081	0.964282	0.953268	0.967012		0.101008	0.248254	0.216887	0.228194	0.846001	0.892396	0.927784		0.101008	0.16623	0.23338	0.208676	0.924444	0.915779	0.883991
0.178836	0.354481	0.286574	0.277987	0.915768	0.960214	0.934478		0.178836	0.222677	0.196699	0.178849	0.83035	0.825381	0.856607		0.178836	0.15643	0.217015	0.195212	0.920793	0.880628	0.873116
0.317236	0.370291	0.243476	0.26611	0.893312	0.928562	0.919829		0.317236	0.210547	0.151455	0.135993	0.757418	0.810108	0.825792		0.317236	0.143424	0.185373	0.181264	0.899698	0.888826	0.874365
0.563349	0.296694	0.261411	0.21345	0.832045	0.821444	0.896249		0.563349	0.17699	0.0855571	0.108409	0.695845	0.736798	0.763761		0.563349	0.142524	0.209734	0.155144	0.837225	0.842823	0.826384
1.00101	0.294195	0.242548	0.212408	0.718365	0.841037	0.804737		1.00101	0.145866	0.0805206	0.109644	0.645874	0.710603	0.725032		1.00101	0.112207	0.156647	0.151705	0.800309	0.816931	0.771019
1.77929	0.243041	0.187753	0.174019	0.620999	0.739369	0.72039		1.77929	0.117736	0.0863612	0.0943396	0.569166	0.639839	0.660872		1.77929	0.0932873	0.166462	0.131062	0.740879	0.670606	0.721414
3.16329	0.217645	0.184817	0.169323	0.501557	0.604281	0.622432		3.16329	0.114863	0.054153	0.0559494	0.452028	0.546212	0.58797		3.16329	0.0813096	0.127917	0.119435	0.637839	0.562027	0.641076
5.62442	0.219689	0.20472	0.127338	0.39131	0.448171	0.489876		5.62442	0.0966038	0.0623214	0.0678655	0.329501	0.468644	0.495914		5.62442	0.0657194	0.144643	0.0998968	0.55275	0.463238	0.561486
10.001	0.169398	0.150716	0.111483	0.284283	0.348302	0.333205		10.001	0.116698	0.0917363	0.0260968	0.229523	0.362707	0.364125		10.001	0.0726645	0.122459	0.0863444	0.379766	0.383853	0.436994
17.7838	0.124513	0.135687	0.112748	0.150054	0.208054	0.243205		17.7838	0.0553335	0.0382817	0.0275216	0.144063	0.264775	0.263274		17.7838	0.0403682	0.101367	0.0672162	0.254988	0.288839	0.336683
31.6238	0.127421	0.165077	0.0848283	0.136114	0.196187	0.16518		31.6238	0.0429241	-0.000105809	-0.00597008	0.0856486	0.177952	0.170536		31.6238	0.0709921	0.075187	0.061589	0.156242	0.217027	0.236716
56.2351	0.136916	0.166536	0.100566	0.10154	0.172397	0.125895		56.2351	0.0499029	-0.000444397	-0.0236646	0.0566815	0.0991808	0.0909565		56.2351	0.0654274	0.0562758	0.0356412	0.0767644	0.127421	0.138204
100.001	0.100798	0.211827	0.136843	0.116285	0.287295	0.1444		100.001	0.0520297	-0.00975558	-0.0493107	0.0381823	0.0195307	0.0211946		100.001	0.0359164	0.0860983	0.0450285	0.0944111	0.0734207	0.0569901
