# Supplementary material for: Impact of energy limitations on function and resilience in long-wavelength Photosystem II
Source: eLife. 2022 Jul 19;11:e79890. doi: 10.7554/eLife.79890 (PMC9439682; doi:10.7554/eLife.79890)
Supplement: Figure 3—source data 1. [file elife-79890-fig3-data1.xlsx]

## Sheet: FIOPs normalised
	C. thermalis (FRL grown)									A. marina									Synechocystis sp. PCC 6803
Flash	red LED	stdev	sim	far red LED	stdev	sim	flashlamp	stdev	sim	red LED	stdev	sim	far red LED	stdev	sim	flashlamp	stdev	sim	red LED	stdev	sim	far red LED	stdev	sim	flashlamp	stdev	sim
1	0.0700877	0.0881812	0	0.0452558	0.00147391	0	0.0595794	0.00688576	0	0.166251	0.105404	0.0287037	0.128914	0.0170219	0.0231976	0.110175	0.041731	0.0260398	0.0192939	0.00236837	0.0261914	0.0548695	0.0127033	0.0156806	0.011551	0.000274068	0.0101917		Note: The data is normalized to the amplitude of the 40th flash
2	0.109443	0.0865372	0.350424	0.0694263	0.00329817	0.339777	0.0855659	0.00976385	0.392598	0.752668	0.0616429	0.67188	0.620096	0.00741833	0.596276	0.775167	0.298742	0.689055	0.417217	0.0274529	0.517014	0.0600269	0.011244	0.102662	0.499089	0.107776	0.402881
3	3.60327	0.395927	3.6823	3.4471	0.443779	3.53791	4.56907	0.327521	4.37294	2.02561	0.181215	2.16528	2.07255	0.111556	2.11212	2.55856	0.0430487	2.50496	1.38663	0.00211526	1.52375	0.194743	0.0248793	0.223501	1.80495	0.0326111	1.92298
4	2.62439	0.23478	2.64536	2.62974	0.193443	2.56289	2.87006	0.155849	2.79851	1.26492	0.0835339	1.20091	1.29366	0.0779537	1.32792	1.31987	0.00283794	1.32616	1.1491	0.0256687	1.15846	0.346998	0.0127021	0.353479	1.03726	0.0158611	1.09968
5	1.80283	0.11735	1.27128	1.85034	0.0609642	1.24563	1.78875	0.0839773	1.19412	0.727975	0.0760847	0.563203	0.793939	0.09031	0.648236	0.662602	0.0135222	0.565535	0.769905	0.030402	0.652842	0.501012	0.0356669	0.477169	0.460766	0.018661	0.406957
6	1.37431	0.0767724	0.883415	1.39676	0.0189885	0.861088	1.31771	0.0433439	0.904362	0.842045	0.0451651	0.805132	0.741906	0.0490911	0.739303	0.816032	0.0753854	0.831908	0.659908	0.0327504	0.628049	0.621289	0.015627	0.585814	0.479696	0.0444355	0.478226
7	2.29425	0.166764	1.92276	2.16624	0.193136	1.83287	2.79472	0.178955	2.39593	1.35934	0.0932093	1.40897	1.26847	0.0157501	1.30429	1.61862	0.0985467	1.6394	0.936617	0.0198797	0.95949	0.70124	0.00792534	0.67533	1.25569	0.0395526	1.28222
8	2.22813	0.148257	2.34438	2.14166	0.170375	2.25073	2.53929	0.153079	2.69948	1.22384	0.104247	1.25499	1.24423	0.0113077	1.30711	1.38568	0.0659455	1.42628	1.00226	0.0173615	1.04691	0.752791	0.0197991	0.744793	1.13437	0.0115685	1.18081
9	1.84603	0.125639	1.9296	1.84503	0.0998194	1.87487	1.93546	0.103615	1.98976	0.926127	0.0958956	0.901996	1.04319	0.0454981	1.00044	0.972056	0.0424019	0.952724	0.890269	0.0234733	0.890893	0.771754	0.0176247	0.795289	0.715895	0.0219664	0.712246
10	1.53943	0.139686	1.47683	1.56432	0.0674395	1.44241	1.54274	0.0725948	1.47886	0.906898	0.0487795	0.912376	0.899983	0.0103058	0.907696	0.911756	0.0675266	0.95737	0.812455	0.0279634	0.789719	0.798682	0.0424485	0.829074	0.616652	0.0356951	0.601478
11	1.80457	0.116356	1.61093	1.75319	0.125437	1.55056	2.01542	0.110073	1.86636	1.14403	0.0707106	1.15783	1.08496	0.0303278	1.08581	1.33217	0.0731061	1.31617	0.910599	0.00743872	0.853844	0.826969	0.0320503	0.848959	1.05534	0.0306102	0.99301
12	1.84237	0.12392	1.92375	1.78198	0.1094	1.84292	2.06621	0.097286	2.27279	1.17036	0.0810194	1.17826	1.16169	0.0161022	1.17686	1.34135	0.10331	1.34386	0.960506	0.0110189	0.929661	0.819894	0.017237	0.85789	1.10463	0.0217835	1.09875
13	1.67992	0.110653	1.95323	1.66389	0.069566	1.8832	1.82718	0.0692456	2.15666	1.03083	0.0960729	1.03183	1.05534	0.0117098	1.09206	1.08968	0.0952359	1.12357	0.913925	0.0136308	0.914961	0.852533	0.027492	0.85867	0.832595	0.0194248	0.865363
14	1.51166	0.112853	1.76348	1.51506	0.0411466	1.7122	1.55807	0.0581807	1.84262	0.970274	0.073173	0.992089	1.02919	0.000821219	1.0151	0.965053	0.118332	1.06031	0.869217	0.0272394	0.866402	0.860691	0.0115605	0.853793	0.713452	0.0304631	0.720678
15	1.53599	0.116618	1.68371	1.51355	0.0578239	1.63046	1.63312	0.0545372	1.83828	1.06182	0.076859	1.08139	1.07999	0.0190944	1.0505	1.15574	0.0724135	1.20456	0.915203	0.0205092	0.861112	0.86423	0.0200502	0.845359	0.978583	0.0174552	0.8815
16	1.54902	0.12308	1.77405	1.51123	0.0452418	1.70728	1.65849	0.0361032	2.03852	1.09552	0.056185	1.11926	1.11307	0.0784786	1.1051	1.26729	0.0521747	1.26559	0.945938	0.018786	0.887682	0.876345	0.0204862	0.835051	1.07575	0.0196366	1.00573
			C. thermalis (FRL grown)	red led	far red led	Flashlamp						A. marina	red led	far red led	Flashlamp						Syn. 6803	red led	far red led	Flashlamp
			Miss factor	19.8	20.2	17.2						Miss factor	14.2	17	13.2						Miss factor	19.8	82	12.1
			error %	6.60665	5.93501	5.61628						error %	3.43662	2.08241	2.76245						error %	2.45192	3.21811	2.1695

## Sheet: FIOPs raw
	C. thermalis (FRL grown)						A. marina						Synechocystis sp. PCC 6803						C. thermalis (WL grown)
Flash	red LED	stdev	far red LED	stdev	flashlamp	stdev	red LED	stdev	far red LED	stdev	flashlamp	stdev	red LED	stdev	far red LED	stdev	flashlamp	stdev	red LED	stdev	far red LED	stdev	flashlamp	stdev
1	0.02209	0.00283	0.0231	0.00398	0.01962	0.00223	0.04266	0.01837	0.03731	0.00725	0.02637	0.0025	0.02401	0.00161	0.0214	0.0021	0.02114	0.00213	0.01624	0.00204	0.01675	0.00165	0.01596	0.000470968
2	0.0345	0.0029	0.03544	0.0068	0.02817	0.00212	0.19313	0.03231	0.17946	0.0172	0.1855	0.08212	0.51923	0.08543	0.02341	0.00143	0.9132	0.25199	0.07194	0.01233	0.01581	0.00218	0.13853	0.0253
3	1.13583	0.41168	1.75964	0.26742	1.50448	0.1199	0.51977	0.13159	0.59982	0.08449	0.61227	0.11229	1.72566	0.2749	0.07594	0.01395	3.30258	0.31944	0.26344	0.03207	0.01344	0.00166	0.48878	0.03087
4	0.82726	0.32923	1.3424	0.2263	0.94504	0.06125	0.32457	0.07525	0.3744	0.05439	0.31585	0.05371	1.43005	0.2522	0.1353	0.01493	1.89791	0.19466	0.31764	0.04479	0.02175	0.00336	0.49624	0.01997
5	0.56829	0.23572	0.94454	0.16738	0.58899	0.03648	0.1868	0.03315	0.22977	0.04179	0.15856	0.02493	0.95815	0.17699	0.19536	0.02022	0.84308	0.11369	0.27567	0.04162	0.03685	0.00989	0.32486	0.02494
6	0.43321	0.17529	0.713	0.13893	0.43389	0.0224	0.21607	0.03075	0.21471	0.01262	0.19528	0.04619	0.82126	0.15369	0.24226	0.02263	0.87772	0.15651	0.22834	0.02838	0.05139	0.01186	0.24537	0.01824
7	0.7232	0.27625	1.10581	0.1645	0.92023	0.0703	0.3488	0.08044	0.36711	0.04131	0.38734	0.08304	1.16562	0.20271	0.27343	0.02972	2.29758	0.22248	0.2254	0.02614	0.06103	0.01638	0.28448	0.00525
8	0.70236	0.27151	1.09325	0.16711	0.83612	0.05991	0.31403	0.07794	0.36009	0.0397	0.3316	0.06799	1.24731	0.21075	0.29353	0.03416	2.0756	0.20648	0.24458	0.02705	0.07365	0.02379	0.34911	0.00855
9	0.58191	0.23555	0.94183	0.15338	0.6373	0.04167	0.23764	0.0627	0.30191	0.04042	0.23262	0.04705	1.10794	0.1976	0.30093	0.0367	1.30989	0.1666	0.24345	0.02801	0.07699	0.02146	0.31711	0.00604
10	0.48526	0.20422	0.79854	0.13329	0.50798	0.0295	0.23271	0.04971	0.26046	0.02914	0.21819	0.0488	1.01109	0.18098	0.31143	0.03607	1.12831	0.16997	0.23424	0.02767	0.08823	0.02409	0.27972	0.00575
11	0.56884	0.22419	0.89495	0.13845	0.66363	0.04555	0.29356	0.06359	0.314	0.03867	0.31879	0.067	1.13324	0.18756	0.32246	0.03693	1.931	0.195	0.23395	0.02624	0.09339	0.02715	0.29383	0.00435
12	0.58075	0.23136	0.90965	0.14339	0.68035	0.04236	0.30031	0.06892	0.33621	0.03816	0.32099	0.07246	1.19535	0.19778	0.3197	0.03807	2.02118	0.18967	0.24396	0.02384	0.0954	0.03067	0.31948	0.00732
13	0.52955	0.21494	0.84936	0.1451	0.60165	0.03214	0.26451	0.06707	0.30543	0.03409	0.26076	0.06077	1.13738	0.19228	0.33242	0.03558	1.52343	0.17834	0.24319	0.0187	0.09874	0.03039	0.30693	0.00618
14	0.47651	0.19586	0.77339	0.14363	0.51303	0.02766	0.24897	0.05569	0.29786	0.03115	0.23094	0.05954	1.08174	0.19747	0.33561	0.03786	1.30543	0.17967	0.2425	0.02422	0.10481	0.03058	0.28899	0.00447
15	0.48418	0.19911	0.77262	0.12947	0.53774	0.02762	0.27246	0.05586	0.31256	0.0363	0.27657	0.05964	1.13897	0.20147	0.33698	0.04079	1.79054	0.18623	0.24526	0.02367	0.11094	0.03152	0.29456	0.00261
16	0.48829	0.19421	0.77143	0.1337	0.5461	0.02335	0.28111	0.05888	0.32213	0.04905	0.30326	0.06081	1.17721	0.20516	0.34171	0.04187	1.96834	0.1892	0.24473	0.02109	0.09765	0.03213	0.30607	0.00402
40	0.31522		0.51047		0.32927		0.2566		0.28941		0.2393		1.2445		0.38993		1.82974		0.2637		0.11846		0.2977
