# Supplementary material for: Impact of energy limitations on function and resilience in long-wavelength Photosystem II
Source: eLife. 2022 Jul 19;11:e79890. doi: 10.7554/eLife.79890 (PMC9439682; doi:10.7554/eLife.79890)
Supplement: Figure 4—source data 1. [file elife-79890-fig4-data1.xlsx]

## Sheet: FR C. thermalis
100% laser power								83% laser power
	Lambda exc								Lambda exc
	680	720	727	734	737	749			680	720	727	734	737	749
1	833.109	848.511	845.553	859.439	884.97	811.297		1	793.235	809.745	775.353	788.338	807.554	761.213
2	165.283	191.437	209.635	200.108	153.538	170.371		2	130.907	151.56	187.466	173.141	148.972	188.354
3	-288.146	-257.447	-239.787	-215.727	-203.085	-188.847		3	-129.539	-159.256	-193.563	-181.827	-170.916	-186.333
4	-86.1463	-111.887	-116.174	-55.983	-46.4071	-85.0393		4	-109.368	-85.9519	-105.923	-99.6637	-97.3323	-93.06
5	139.191	129.85	137.001	105.536	88.3844	102.936		5	74.3978	56.8966	94.5033	51.3259	61.0385	105.606
6	35.5695	15.6546	28.6149	73.4158	23.7379	45.8607		6	36.2741	27.5778	17.0994	58.0452	30.4268	-15.8002
7	-151.127	-73.396	-122.602	-123.686	-103.438	-94.0671		7	-69.2782	-59.177	-54.0843	-96.208	-70.3555	-40.9846
8	-5.54295	-29.4125	-32.3695	-2.1713	-0.56	-13.5493		8	-48.0918	-42.1209	-36.5129	-4.7889	-52.4815	-18.2736
9	36.407	8.9603	68.8148	70.9834	69.2264	9.691		9	39.7533	20.6323	25.7334	4.9351	35.7513	19.793
10	58.8517	-8.0117	15.5199	15.1975	52.1557	78.7699		10	25.8286	38.0921	13.7759	47.7901	57.0718	2.1533
11	-99.5654	-20.9641	-32.5562	-58.9748	-42.8824	-34.6109		11	-34.9432	-28.4865	-21.9129	-44.4576	-46.8828	-6.3227
12	-16.024	-14.9232	-24.5477	14.8758	-1.6209	-28.5683		12	-34.7495	-11.5851	-41.1299	-22.3227	-13.2959	-11.299
13	63.9674	32.7145	82.325	-1.0654	34.0634	22.3171		13	31.0708	4.0806	37.7819	44.8215	-11.3324	10.3041
14	13.391	34.0263	-53.4328	14.1927	-21.0412	26.3203		14	1.1355	11.0795	-5.4686	-13.4185	15.2844	12.7289
15	-39.9918	-51.1045	23.4047	25.551	17.4789	-20.7666		15	-13.3012	1.7793	-33.5814	2.3101	6.2594	27.3098
16	-18.7837	-29.9289	-12.9637	-18.0855	17.5792	8.1081		16	5.2886	11.9842	11.9078	-6.6302	-18.095	-29.6825
17	30.9232	40.649	5.5469	11.6961	26.287	45.22		17	11.375	-2.7211	18.0774	-4.9258	25.3313	15.5094
18	30.6301	19.3916	8.1988	32.7155	49.354	11.813		18	28.8888	-8.2752	22.7367	15.5363	4.4111	22.2678
19	-42.3217	-7.689	-2.509	-21.7021	-29.9212	-28.8104		19	-13.8818	10.9834	-28.8994	11.1342	-13.9293	-17.7344
20	5.2709	-25.7071	-18.0965	19.9158	33.7483	15.1358		20	-1.1528	7.2633	5.406	15.4832	8.3636	9.4401

## Sheet: A. marina
100% laser power
	Lambda exc
	680 nm	725 nm
1	545.335	337.802
2	235.084	118.258
3	-200.2	-155.423
4	-101.56	-87.2587
5	62.8248	-34.042
6	43.3488	-29.3145
7	-83.5407	-117.623
8	-44.6239	-88.0672
9	40.9846	-28.2004
10	49.9101	-34.0813

## Sheet: T. elongatus
100% laser power
	Lambda exc
	680	720	750
1	2760.49	339.006	43.2137
2	406.013	109.83	99.4647
3	-1890.68	146.032	59.4507
4	312.037	27.5005	75.5945
5	1143.12	125.492	62.8195
6	211.083	100.42	69.0966
7	-612.625	-11.8398	18.5439
8	126.05	21.0576	53.58
9	591.87	46.0448	42.0484
10	215.705	59.7452	-12.718
11	-211.041	-17.5745	-42.4223
12	107.846	-23.1837	-0.50986
13	359.876	100.543	52.1763
14	224.933	-24.0343	46.0271
15	-67.659	-5.61809	-32.9879
16	111.537	-27.6609	63.2246
17	220.178	47.6564	-58.5886
18	168.077	54.9336	35.9558
19	2.34062	-85.005	13.5238
20	168.509	42.3858	64.8375

## Sheet: Normalised
	C. thermalis FR 750 nm	C. thermalis FR 680 nm	A. marina 680 nm	A. marina 725 nm	T. elongatus 680 nm	T. elongatus 720 nm	T. elongatus 750 nm
1	2.35403	1.90489	2.07332	3.28298	0.90991	0.11174	0.01424
2	0.64341	0.44714	0.89377	1.47427	0.13383	0.0362	0.03279
3	-0.7098	-0.64607	-0.76114	-0.78045	-0.62321	0.04813	0.0196
4	-0.28191	-0.27602	-0.38612	-0.21888	0.10285	0.00906	0.02492
5	0.2902	0.35393	0.23886	0.21955	0.37679	0.04136	0.02071
6	0.24547	0.08235	0.16481	0.25849	0.06958	0.0331	0.02278
7	-0.21461	-0.24062	-0.31762	-0.46903	-0.20193	-0.0039	0.00611
8	-0.15522	-0.17204	-0.16966	-0.22554	0.04155	0.00694	0.01766
9	0.1443	0.16302	0.15582	0.26767	0.19509	0.01518	0.01386
10	0.13036	0.09377	0.18975	0.21922	0.0711	0.01969	-0.00419
11	-0.13222	-0.17438			-0.06956	-0.00579	-0.01398
12	-0.03443	-0.04244			0.03555	-0.00764	-0.00016806
13	0.14058	0.09677			0.11862	0.03314	0.0172
14	0.05633	0.04137			0.07414	-0.00792	0.01517
15	-0.00467	-0.09906			-0.0223	-0.00185	-0.01087
