# Supplementary material for: Impact of energy limitations on function and resilience in long-wavelength Photosystem II
Source: eLife. 2022 Jul 19;11:e79890. doi: 10.7554/eLife.79890 (PMC9439682; doi:10.7554/eLife.79890)
Supplement: Figure 5—figure supplement 1—source data 1. [file elife-79890-fig5-figsupp1-data1.xlsx]

## Sheet: A. marina
S2QB-																S2QA- (DCMU)
	Replicate 1			Replicate 2			Replicate 3			Replicate 4			Replicate 5				Replicate 1			Replicate 2			Replicate 3			Replicate 4			Replicate 5
-20.1	0.0333333		-20.23	0.00621118		0.51	0.147059		-20.09	0.0139535		-19.81	0.0245098			-19.49	0.0583333		-19.66	0.0745342		1.64	0.923529		-19.74	0.0418605		-19.88	0.112745
-20.14	0.0333333		-19.98	0.00621118		0.56	0.182353		-20.08	0.0139535		-19.65	0.0245098			-19.57	0.075		-19.7	0.0869565		1.45	0.947059		-19.87	0.0325581		-19.83	0.0882353
-20.09	0.025		-19.91	0.00621118		0.62	0.170588		-19.72	0.0139535		-19.62	0.0196078			-19.64	0.075		-19.64	0.0807453		1.37	0.917647		-19.68	0.0418605		-19.87	0.0980392
-20.12	0.025		-20.08	0		0.62	0.158824		-20.18	0.0139535		-19.58	0.0245098			-19.48	0.0833333		-19.62	0.0869565		1.53	0.905882		-19.79	0.0372093		-19.87	0.0980392
-20.05	0.025		-20	0.00621118		0.53	0.170588		-19.98	0.0139535		-19.77	0.0245098			-19.51	0.0833333		-19.64	0.0745342		1.58	0.917647		-19.7	0.0465116		-19.69	0.117647
-20.06	0.025		-19.98	0.00621118		0.57	0.158824		-20.06	0.0139535		-19.72	0.0245098			-19.55	0.0666667		-19.62	0.0745342		1.31	0.9		-19.7	0.0511628		-19.73	0.102941
-20	0.0333333		-20.01	0.00621118		0.53	0.147059		-20	0.0139535		-19.72	0.0245098			-19.53	0.0666667		-19.57	0.0807453		1.48	0.888235		-19.73	0.0418605		-19.64	0.0980392
-19.98	0.0333333		-19.93	0.0124224		0.69	0.158824		-20.08	0.0139535		-19.66	0.0294118			-19.48	0.075		-19.57	0.0869565		1.56	0.876471		-19.64	0.0372093		-19.62	0.102941
-19.95	0.025		-19.95	0.00621118		0.66	0.170588		-20.09	0.0139535		-19.65	0.0294118			-19.52	0.075		-19.51	0.0745342		1.61	0.847059		-19.69	0.0465116		-19.45	0.107843
-19.81	0.0333333		-19.8	0.00621118		0.77	0.152941		-19.6	0.0139535		-19.79	0.0294118			-19.37	0.0666667		-19.39	0.068323		1.62	0.823529		-19.58	0.0418605		-19.51	0.0931373
-19.72	0.0333333		-19.7	0.00621118		0.81	0.170588		-19.49	0.0139535		-19.51	0.0245098			-19.33	0.075		-19.36	0.0745342		1.57	0.835294		-19.45	0.0511628		-19.12	0.107843
-19.57	0.0333333		-19.6	0.00621118		1	0.147059		-19.48	0.0139535		-19.53	0.0196078			-19.19	0.0666667		-19.23	0.0745342		1.81	0.817647		-19.33	0.0465116		-19.07	0.0931373
-19.44	0.025		-19.47	0		1.06	0.147059		-19.3	0.0139535		-19.37	0.0294118			-19.12	0.075		-19.07	0.0807453		1.9	0.852941		-19.14	0.0372093		-18.9	0.117647
-19.23	0.0333333		-19.44	0.00621118		1.29	0.158824		-19.12	0.0139535		-19.22	0.0245098			-18.93	0.0666667		-19.03	0.0931677		2.02	0.870588		-18.99	0.0465116		-18.71	0.102941
-19.03	0.025		-19.35	0.0124224		1.27	0.164706		-19.05	0.0139535		-19.01	0.0245098			-18.81	0.075		-18.8	0.0807453		2.07	0.811765		-18.81	0.0418605		-18.55	0.107843
-18.84	0.025		-18.98	0.00621118		1.48	0.170588		-18.84	0.0186047		-18.98	0.0196078			-18.61	0.0833333		-18.6	0.0807453		2.21	0.835294		-18.55	0.0465116		-18.28	0.107843
-18.67	0.0333333		-18.86	0.00621118		1.6	0.164706		-18.78	0.0139535		-18.64	0.0294118			-18.5	0.075		-18.42	0.0807453		2.3	0.823529		-18.37	0.0465116		-17.98	0.107843
-18.42	0.025		-18.69	0.00621118		1.91	0.164706		-18.29	0.0139535		-18.42	0.0294118			-18.28	0.0833333		-18.19	0.0807453		2.64	0.858824		-18.09	0.0511628		-17.86	0.117647
-18.12	0.025		-18.38	0.0124224		2.09	0.164706		-17.96	0.0186047		-18.19	0.0245098			-17.98	0.0666667		-17.94	0.0993789		2.74	0.864706		-17.98	0.0511628		-17.59	0.112745
-17.92	0.025		-18.04	0.00621118		2.27	0.158824		-17.91	0.0139535		-18.05	0.0294118			-17.87	0.075		-17.69	0.0931677		2.93	0.882353		-17.82	0.055814		-17.37	0.117647
-17.62	0.025		-17.88	0.00621118		2.56	0.164706		-17.71	0.00930233		-17.98	0.0245098			-17.59	0.075		-17.48	0.0993789		3.11	0.888235		-17.48	0.0511628		-17.1	0.127451
-17.36	0.0333333		-17.48	0.00621118		2.79	0.170588		-17.42	0.0139535		-17.57	0.0196078			-17.37	0.0833333		-17.2	0.0931677		3.53	0.841176		-17.28	0.0418605		-16.83	0.117647
-17.01	0.0333333		-17.24	0		3.1	0.170588		-17.28	0.0139535		-17.4	0.0245098			-17.1	0.0916667		-16.89	0.0993789		3.78	0.841176		-16.98	0.0511628		-16.62	0.117647
-16.64	0.0333333		-17.04	0.0124224		3.4	0.164706		-17.06	0.0186047		-17.23	0.0294118			-16.81	0.1		-16.6	0.111801		3.92	0.870588		-16.81	0.055814		-16.29	0.132353
-16.43	0.025		-16.54	0.00621118		3.57	0.176471		-16.81	0.0139535		-17.04	0.0245098			-16.5	0.075		-16.35	0.10559		4.23	0.882353		-16.58	0.0465116		-15.98	0.127451
-16.15	0.025		-16.38	0.00621118		3.86	0.182353		-16.48	0.0186047		-16.76	0.0294118			-16.33	0.075		-16.12	0.111801		4.58	0.917647		-16.3	0.0511628		-15.8	0.127451
-15.85	0.0333333		-15.81	0.00621118		4.18	0.182353		-16.54	0.0186047		-16.54	0.0294118			-15.9	0.0833333		-15.77	0.118012		4.67	0.935294		-16.04	0.0372093		-15.44	0.132353
-15.62	0.0333333		-15.71	0.00621118		4.43	0.170588		-16.27	0.00930233		-16.38	0.0294118			-15.67	0.0833333		-15.54	0.10559		5.17	0.911765		-15.9	0.0604651		-15.25	0.137255
-15.34	0.0333333		-15.44	0.00621118		4.7	0.205882		-16.06	0.0139535		-16.01	0.0245098			-15.4	0.0833333		-15.16	0.0993789		5.31	0.917647		-15.56	0.0511628		-15.04	0.137255
-15.13	0.0333333		-15.13	0.00621118		4.92	0.2		-15.51	0.0139535		-15.88	0.0294118			-15.15	0.0833333		-15	0.124224		5.49	0.923529		-15.55	0.0511628		-14.83	0.132353
-14.84	0.0333333		-15.01	0.0124224		5.23	0.194118		-15.62	0.0186047		-15.75	0.0294118			-14.8	0.1		-14.72	0.118012		5.75	0.911765		-15.16	0.055814		-14.69	0.151961
-14.53	0.025		-14.65	0.0124224		5.39	0.188235		-15.3	0.0186047		-15.24	0.0294118			-14.61	0.0916667		-14.49	0.118012		6.12	0.964706		-14.96	0.0511628		-14.55	0.151961
-14.33	0.025		-14.44	0.0124224		5.62	0.205882		-15.09	0.00930233		-15.19	0.0343137			-14.44	0.1		-14.23	0.118012		6.25	0.947059		-14.76	0.055814		-14.41	0.156863
-14.12	0.0333333		-14.27	0.0124224		5.85	0.205882		-14.6	0.0139535		-14.9	0.0294118			-14.15	0.1		-13.98	0.124224		6.54	0.976471		-14.51	0.0604651		-14.12	0.171569
-13.93	0.0416667		-14.15	0.0124224		6.04	0.188235		-14.65	0.0186047		-14.78	0.0294118			-13.97	0.108333		-13.81	0.136646		6.78	1		-14.22	0.0511628		-14.02	0.176471
-13.69	0.0333333		-13.79	0.00621118		6.42	0.205882		-14.51	0.0186047		-14.51	0.0343137			-13.69	0.116667		-13.55	0.149068		7.06	1.00588		-14.18	0.0511628		-13.75	0.156863
-13.46	0.0416667		-13.75	0.00621118		6.56	0.229412		-14.2	0.0186047		-14.24	0.0245098			-13.58	0.1		-13.38	0.15528		7.1	1.03529		-13.93	0.0604651		-13.46	0.161765
-13.32	0.0333333		-13.32	0.0186335		6.83	0.235294		-14.19	0.0139535		-14.14	0.0343137			-13.34	0.108333		-13.15	0.124224		7.49	1.00588		-13.71	0.0744186		-13.4	0.186275
-13.06	0.0333333		-13.16	0.0124224		7.03	0.229412		-13.5	0.0232558		-13.88	0.0294118			-13.05	0.116667		-12.98	0.149068		7.59	1.05882		-13.49	0.0604651		-13.01	0.166667
-12.9	0.0333333		-13.13	0.0124224		7.31	0.229412		-13.4	0.0232558		-13.59	0.0343137			-12.87	0.133333		-12.79	0.136646		7.81	1.07647		-13.37	0.0697674		-12.94	0.171569
-12.85	0.0416667		-12.79	0.0124224		7.33	0.223529		-13.37	0.0186047		-13.49	0.0343137			-12.69	0.116667		-12.48	0.161491		8.06	1.01765		-13.12	0.0651163		-12.8	0.196078
-12.48	0.0416667		-12.68	0.0186335		7.6	0.235294		-13.1	0.0186047		-13.23	0.0392157			-12.48	0.125		-12.38	0.173913		8.24	1.11176		-12.99	0.0651163		-12.6	0.186275
-12.36	0.0333333		-12.4	0.0124224		7.67	0.229412		-13.08	0.0232558		-13.13	0.0343137			-12.4	0.108333		-12.16	0.149068		8.36	1.05882		-12.68	0.0697674		-12.4	0.210784
-12.17	0.0416667		-12.5	0.0124224		8.04	0.235294		-12.64	0.0186047		-12.9	0.0294118			-12.24	0.15		-12.05	0.167702		8.61	1.08235		-12.52	0.0697674		-12.32	0.196078
-12.03	0.0416667		-12.12	0.0124224		8.14	0.252941		-12.54	0.0139535		-12.64	0.0392157			-11.99	0.133333		-11.87	0.180124		8.91	1.12941		-12.4	0.0697674		-12.05	0.186275
-11.98	0.0416667		-12.13	0.0186335		8.38	0.241176		-12.55	0.0186047		-12.48	0.0294118			-11.78	0.133333		-11.74	0.167702		8.95	1.12941		-12.03	0.0697674		-11.82	0.191176
-11.77	0.0333333		-11.85	0.0124224		8.5	0.252941		-12.25	0.0232558		-12.24	0.0343137			-11.66	0.133333		-11.5	0.186335		9.24	1.12941		-11.91	0.0837209		-11.69	0.220588
-11.56	0.0416667		-11.69	0.0186335		8.7	0.247059		-11.87	0.0232558		-12.09	0.0343137			-11.56	0.133333		-11.4	0.167702		9.38	1.13529		-11.8	0.0837209		-11.48	0.215686
-11.4	0.0416667		-11.48	0.0186335		8.9	0.252941		-11.58	0.0232558		-11.97	0.0392157			-11.19	0.133333		-11.14	0.186335		9.47	1.15294		-11.51	0.0697674		-11.28	0.210784
-11.24	0.0416667		-11.4	0.0186335		9.17	0.258824		-11.7	0.0186047		-11.72	0.0392157			-11.1	0.141667		-11.01	0.180124		9.44	1.1		-11.3	0.0697674		-11.14	0.215686
-11.06	0.0333333		-11.25	0.0124224		9.2	0.276471		-11.34	0.0186047		-11.59	0.0490196			-10.89	0.15		-10.8	0.204969		9.83	1.14118		-11.1	0.0697674		-10.94	0.240196
-10.83	0.0333333		-11.12	0.0124224		9.56	0.264706		-11.32	0.0186047		-11.38	0.0441176			-10.8	0.141667		-10.69	0.204969		9.92	1.1		-10.91	0.0651163		-10.58	0.220588
-10.75	0.05		-10.91	0.0186335		9.77	0.288235		-10.93	0.0232558		-11.1	0.0441176			-10.75	0.133333		-10.54	0.204969		10.17	1.17647		-10.83	0.0697674		-10.34	0.235294
-10.44	0.0583333		-10.9	0.0124224		9.87	0.264706		-10.81	0.027907		-10.98	0.0392157			-10.37	0.166667		-10.28	0.204969		10.38	1.14706		-10.49	0.0744186		-10.08	0.25
-10.37	0.0416667		-10.46	0.0186335		10.1	0.288235		-10.63	0.0186047		-10.8	0.0441176			-10.26	0.15		-10.08	0.204969		10.63	1.14118		-10.27	0.0837209		-10.1	0.22549
-10.24	0.0416667		-10.41	0.0186335		10.2	0.288235		-10.45	0.027907		-10.51	0.0343137			-9.94	0.166667		-9.92	0.229814		10.81	1.15294		-10.16	0.0837209		-9.82	0.235294
-9.85	0.0333333		-10	0.0248447		10.44	0.288235		-10.18	0.0232558		-10.48	0.0392157			-9.96	0.175		-9.73	0.21118		10.89	1.17647		-9.94	0.0930233		-9.71	0.254902
-9.73	0.05		-9.94	0.0186335		10.64	0.317647		-10.08	0.0186047		-10.12	0.0441176			-9.53	0.175		-9.47	0.242236		11.09	1.18235		-9.7	0.0837209		-9.45	0.254902
-9.51	0.0416667		-9.78	0.0248447		10.83	0.317647		-9.92	0.0232558		-9.94	0.0539216			-9.44	0.175		-9.27	0.26087		11.34	1.17647		-9.39	0.0930233		-9.23	0.245098
-9.39	0.0583333		-9.61	0.0248447		11.06	0.305882		-9.52	0.0186047		-9.82	0.0441176			-9.25	0.166667		-9.09	0.254658		11.51	1.22941		-9.29	0.0837209		-8.98	0.245098
-9.17	0.05		-9.33	0.0248447		11.34	0.305882		-9.27	0.027907		-9.58	0.0441176			-9.05	0.175		-8.93	0.26087		11.64	1.19412		-9.05	0.0930233		-8.85	0.254902
-8.95	0.0583333		-9.08	0.0310559		11.49	0.323529		-8.99	0.027907		-9.44	0.0441176			-8.89	0.175		-8.72	0.267081		11.99	1.21176		-8.94	0.0837209		-8.67	0.254902
-8.72	0.05		-8.93	0.0248447		11.74	0.305882		-8.81	0.027907		-9.08	0.0343137			-8.61	0.2		-8.48	0.26087		12.13	1.26471		-8.61	0.111628		-8.45	0.27451
-8.48	0.05		-8.69	0.0248447		12.05	0.335294		-8.71	0.0232558		-8.95	0.0392157			-8.57	0.183333		-8.26	0.248447		12.29	1.23529		-8.51	0.0976744		-8.27	0.254902
-8.31	0.0583333		-8.45	0.0372671		12.1	0.311765		-8.59	0.0232558		-8.62	0.0539216			-8.3	0.2		-8.06	0.267081		12.49	1.22941		-8.33	0.0976744		-8.02	0.264706
-8.13	0.05		-8.09	0.0248447		12.33	0.305882		-8.32	0.0232558		-8.54	0.0441176			-8.02	0.2		-7.91	0.285714		12.63	1.25294		-8.04	0.0930233		-7.82	0.303922
-7.91	0.0666667		-7.94	0.0248447		12.54	0.347059		-8.15	0.0232558		-8.3	0.0441176			-7.8	0.2		-7.72	0.279503		13.06	1.3		-7.86	0.116279		-7.64	0.289216
-7.64	0.0416667		-7.82	0.0248447		12.84	0.335294		-8	0.027907		-8.19	0.0441176			-7.48	0.208333		-7.5	0.298137		12.93	1.27647		-7.8	0.102326		-7.36	0.29902
-7.41	0.05		-7.7	0.0372671		12.95	0.341176		-8.04	0.027907		-7.96	0.0588235			-7.3	0.191667		-7.3	0.335404		13.38	1.24118		-7.56	0.0930233		-7.22	0.29902
-7.3	0.0583333		-7.38	0.0434783		13.23	0.352941		-7.6	0.0232558		-7.72	0.0539216			-7.1	0.2		-7.16	0.329193		13.6	1.25882		-7.34	0.106977		-7.06	0.27451
-7.08	0.05		-6.96	0.0310559		13.45	0.347059		-7.4	0.0325581		-7.36	0.0539216			-6.92	0.216667		-6.9	0.304348		13.74	1.26471		-7.1	0.0976744		-6.74	0.284314
-6.82	0.05		-6.9	0.0310559		13.64	0.358824		-7.36	0.0232558		-7.28	0.0539216			-6.72	0.208333		-6.73	0.322981		13.85	1.25882		-6.94	0.0976744		-6.56	0.303922
-6.55	0.0583333		-6.66	0.0372671		13.81	0.352941		-7.02	0.0325581		-7.05	0.0539216			-6.44	0.2		-6.46	0.322981		14.1	1.27647		-6.73	0.111628		-6.44	0.294118
-6.33	0.0583333		-6.59	0.0372671		14.04	0.364706		-6.83	0.0325581		-6.85	0.0441176			-6.22	0.2		-6.27	0.310559		14.28	1.35294		-6.59	0.0976744		-6.09	0.29902
-6.14	0.05		-6.18	0.0496894		14.16	0.4		-6.65	0.027907		-6.6	0.0588235			-6.02	0.241667		-6.09	0.347826		14.58	1.34118		-6.28	0.111628		-5.9	0.303922
-5.98	0.05		-6.09	0.0310559		14.45	0.370588		-6.36	0.027907		-6.42	0.0539216			-5.81	0.241667		-5.89	0.347826		14.78	1.28235		-6.16	0.0976744		-5.65	0.303922
-5.65	0.05		-5.82	0.0372671		14.61	0.405882		-6.19	0.0325581		-6.16	0.0539216			-5.62	0.233333		-5.65	0.385093		14.99	1.3		-5.77	0.111628		-5.5	0.289216
-5.55	0.0666667		-5.65	0.0496894		14.81	0.394118		-6.14	0.0325581		-6.13	0.0441176			-5.49	0.25		-5.46	0.378882		15.17	1.36471		-5.65	0.102326		-5.31	0.303922
-5.44	0.0583333		-5.31	0.0434783		15.02	0.417647		-5.9	0.027907		-5.82	0.0490196			-5.19	0.2		-5.25	0.372671		15.45	1.30588		-5.51	0.111628		-5.19	0.29902
-5.11	0.0666667		-5.13	0.0372671		15.18	0.411765		-5.4	0.0325581		-5.65	0.0539216			-5.03	0.266667		-5.11	0.409938		15.47	1.32353		-5.19	0.0930233		-4.8	0.313725
-4.93	0.0666667		-4.79	0.0496894		15.41	0.405882		-5.5	0.027907		-5.46	0.0490196			-4.89	0.283333		-4.93	0.385093		15.72	1.32941		-5.08	0.106977		-4.7	0.313725
-4.77	0.05		-4.76	0.0559006		15.6	0.429412		-5.08	0.0325581		-5.31	0.0490196			-4.67	0.25		-4.66	0.385093		15.97	1.37059		-4.77	0.106977		-4.51	0.318627
-4.5	0.05		-4.57	0.0496894		15.86	0.435294		-4.91	0.0325581		-5.19	0.0490196			-4.43	0.25		-4.54	0.42236		16.05	1.36471		-4.73	0.116279		-4.28	0.333333
-4.33	0.0583333		-4.37	0.0496894		16	0.429412		-4.76	0.0372093		-4.87	0.0637255			-4.22	0.25		-4.3	0.409938		16.48	1.33529		-4.42	0.116279		-4.19	0.348039
-4.18	0.0833333		-4.2	0.0559006		16.33	0.429412		-4.77	0.0372093		-4.59	0.0490196			-4.05	0.25		-4.1	0.42236		16.42	1.38235		-4.15	0.116279		-4.02	0.343137
-3.98	0.0666667		-4.02	0.0496894		16.44	0.441176		-4.55	0.027907		-4.44	0.0637255			-3.87	0.241667		-3.89	0.447205		16.81	1.38824		-4.06	0.125581		-3.73	0.357843
-3.63	0.0666667		-3.78	0.0434783		16.61	0.458824		-4.12	0.0325581		-4.26	0.0637255			-3.51	0.283333		-3.69	0.416149		16.96	1.34118		-3.95	0.116279		-3.48	0.372549
-3.45	0.075		-3.58	0.0621118		16.83	0.441176		-4.1	0.0325581		-4.08	0.0539216			-3.51	0.266667		-3.48	0.409938		17.24	1.35294		-3.65	0.111628		-3.31	0.382353
-3.29	0.0583333		-3.4	0.0559006		17.13	0.470588		-3.69	0.027907		-3.91	0.0637255			-3.29	0.258333		-3.25	0.434783		17.27	1.35882		-3.57	0.102326		-3.2	0.416667
-3.12	0.0583333		-3.29	0.0434783		17.35	0.464706		-3.76	0.0325581		-3.78	0.0686275			-3.14	0.275		-3.04	0.490683		17.65	1.4		-3.28	0.116279		-2.94	0.431373
-2.94	0.075		-3.02	0.0621118		17.55	0.5		-3.53	0.027907		-3.47	0.0637255			-3	0.316667		-2.9	0.428571		17.89	1.4		-3.1	0.125581		-2.76	0.45098
-2.55	0.075		-2.87	0.0745342		17.72	0.482353		-3.01	0.0325581		-3.31	0.0735294			-2.72	0.283333		-2.68	0.440994		18.17	1.34706		-2.92	0.12093		-2.57	0.465686
-2.45	0.075		-2.81	0.068323		17.92	0.5		-3	0.0325581		-3.12	0.0490196			-2.5	0.3		-2.44	0.478261		18.16	1.36471		-2.73	0.148837		-2.44	0.47549
-2.19	0.0833333		-2.48	0.068323		18.15	0.476471		-2.82	0.027907		-2.94	0.0539216			-2.35	0.283333		-2.14	0.484472		18.35	1.36471		-2.64	0.148837		-2.17	0.5
-2.08	0.0666667		-2.3	0.0869565		18.27	0.529412		-2.58	0.027907		-2.69	0.0588235			-2.15	0.283333		-2.06	0.465839		18.52	1.37647		-2.21	0.130233		-2.11	0.5
-1.8	0.075		-2.23	0.0745342		18.53	0.523529		-2.23	0.0325581		-2.54	0.0588235			-1.87	0.283333		-1.82	0.459627		18.81	1.38824		-2.1	0.153488		-1.82	0.5
-1.68	0.075		-1.92	0.0745342		18.61	0.517647		-2.05	0.027907		-2.26	0.0588235			-1.74	0.341667		-1.58	0.484472		18.96	1.39412		-1.9	0.144186		-1.46	0.52451
-1.39	0.0916667		-1.69	0.0745342		18.95	0.523529		-1.76	0.0325581		-2.15	0.0588235			-1.54	0.35		-1.41	0.515528		19.02	1.4		-1.69	0.144186		-1.45	0.52451
-1.2	0.0833333		-1.54	0.0869565		19.13	0.541176		-1.53	0.0372093		-1.97	0.0588235			-1.37	0.316667		-1.25	0.534161		19.4	1.38824		-1.57	0.15814		-1.26	0.553922
-1.08	0.1		-1.26	0.0807453		19.31	0.511765		-1.26	0.0325581		-1.73	0.0588235			-1.08	0.291667		-1.03	0.509317		19.62	1.39412		-1.29	0.15814		-1.07	0.578431
-0.71	0.075		-1.14	0.0745342		19.57	0.547059		-1.27	0.0325581		-1.54	0.0588235			-0.87	0.316667		-0.83	0.52795		19.79	1.37647		-1.18	0.190698		-0.86	0.563725
-0.75	0.0916667		-0.96	0.0807453		19.66	0.547059		-1.23	0.0325581		-1.31	0.0637255			-0.69	0.35		-0.64	0.534161		20.09	1.41176		-0.87	0.176744		-0.62	0.637255
-0.45	0.0916667		-0.75	0.0869565		19.92	0.547059		-1.05	0.0325581		-1.06	0.0637255			-0.51	0.35		-0.45	0.57764		20.02	1.32353		-0.57	0.172093		-0.36	0.598039
-0.23	0.116667		-0.48	0.0931677		20.13	0.588235		-0.76	0.0418605		-0.96	0.0637255			-0.42	0.341667		-0.25	0.534161		20.28	1.39412		-0.42	0.186047		-0.22	0.642157
-0.07	0.0916667		-0.4	0.0931677		20.37	0.605882		-0.48	0.0372093		-0.68	0.0588235			-0.21	0.325		-0.11	0.571429		20.56	1.38235		-0.28	0.213953		0	0.647059
0.08	0.0833333		-0.19	0.0869565		20.58	0.605882		-0.33	0.0372093		-0.6	0.0686275			0.12	0.333333		0.16	0.583851		20.74	1.35294		-0.09	0.190698		0.24	0.647059
0.29	0.1		0.03	0.0993789		20.7	0.594118		-0.19	0.0418605		-0.3	0.0637255			0.27	0.358333		0.35	0.596273		20.96	1.4		0.12	0.190698		0.51	0.691176
0.47	0.0916667		0.25	0.0931677		20.92	0.588235		0.11	0.0372093		-0.12	0.0637255			0.55	0.341667		0.49	0.565217		21.16	1.40588		0.32	0.204651		0.63	0.671569
0.66	0.0916667		0.49	0.0931677		21.14	0.605882		0.35	0.0418605		0.12	0.0784314			0.67	0.391667		0.8	0.621118		21.46	1.35882		0.61	0.223256		0.92	0.705882
0.92	0.108333		0.67	0.0993789		21.38	0.635294		0.32	0.0418605		0.32	0.0833333			0.96	0.35		0.92	0.565217		21.56	1.39412		0.78	0.213953		1.1	0.686275
1.18	0.0916667		0.85	0.118012		21.62	0.641176		0.57	0.0372093		0.49	0.0833333			1.12	0.358333		1.25	0.608696		21.64	1.36471		1.02	0.209302		1.23	0.710784
1.25	0.0916667		1.09	0.0931677		21.69	0.658824		0.77	0.0418605		0.66	0.0784314			1.42	0.366667		1.55	0.602484		21.74	1.36471		1.31	0.218605		1.47	0.735294
1.45	0.1		1.31	0.118012		22.02	0.694118		0.85	0.0511628		0.95	0.0833333			1.53	0.383333		1.72	0.639752		22.1	1.4		1.39	0.237209		1.64	0.759804
1.78	0.1		1.55	0.118012		22.27	0.676471		1.31	0.0465116		1.08	0.0931373			1.81	0.425		1.91	0.639752		22.33	1.34706		1.62	0.227907		1.88	0.784314
1.97	0.108333		1.77	0.124224		22.27	0.652941		1.45	0.055814		1.29	0.0784314			1.95	0.383333		2.15	0.639752		22.55	1.35882		1.77	0.232558		2.02	0.784314
2.07	0.108333		1.88	0.124224		22.58	0.676471		1.81	0.0604651		1.56	0.0931373			2.17	0.391667		2.4	0.645963		22.65	1.37059		2.11	0.24186		2.29	0.75
2.31	0.116667		2.34	0.118012		22.84	0.723529		1.97	0.0511628		1.78	0.0784314			2.31	0.4		2.6	0.689441		22.78	1.41176		2.31	0.237209		2.52	0.808824
2.54	0.108333		2.35	0.136646		23.02	0.752941		2.19	0.0511628		1.95	0.0833333			2.63	0.416667		2.79	0.670807		23.06	1.36471		2.34	0.237209		2.68	0.838235
2.7	0.0833333		2.56	0.149068		23.22	0.735294		2.37	0.0418605		2.13	0.0882353			2.79	0.416667		2.92	0.639752		23.18	1.38235		2.74	0.265116		2.93	0.808824
2.95	0.116667		2.81	0.142857		23.48	0.758824		2.56	0.0465116		2.43	0.0882353			3.05	0.433333		3.2	0.701863		23.54	1.38235		2.92	0.24186		3.24	0.818627
3.1	0.116667		2.95	0.130435		23.52	0.782353		2.54	0.055814		2.54	0.0931373			3.34	0.383333		3.4	0.708075		23.81	1.35294		2.91	0.255814		3.26	0.843137
3.43	0.108333		3.08	0.136646		23.77	0.8		2.93	0.0604651		2.77	0.0980392			3.45	0.45		3.51	0.677019		23.81	1.33529		3.28	0.265116		3.63	0.833333
3.57	0.108333		3.49	0.161491		23.99	0.764706		3.35	0.0604651		2.95	0.0931373			3.71	0.433333		3.74	0.726708		24.22	1.37647		3.57	0.251163		3.88	0.828431
3.86	0.1		3.63	0.15528		24.15	0.835294		3.36	0.0604651		3.24	0.0931373			3.92	0.4		3.94	0.73913		24.35	1.32941		3.76	0.265116		4.09	0.892157
4.06	0.116667		3.68	0.167702		24.31	0.811765		3.43	0.0651163		3.51	0.0882353			4.17	0.425		4.13	0.73913		24.51	1.38235		3.85	0.269767		4.29	0.877451
4.14	0.108333		4.05	0.161491		24.63	0.852941		3.66	0.0651163		3.74	0.0931373			4.38	0.425		4.34	0.757764		24.55	1.33529		4.09	0.24186		4.38	0.882353
4.44	0.108333		4.24	0.142857		24.84	0.841176		3.82	0.0511628		3.9	0.102941			4.56	0.416667		4.52	0.78882		25.09	1.34118		4.17	0.269767		4.54	0.901961
4.59	0.133333		4.39	0.149068		25.1	0.835294		4.35	0.0511628		4.06	0.0980392			4.71	0.425		4.74	0.763975		25.15	1.35882		4.44	0.27907		4.67	0.911765
4.85	0.133333		4.54	0.149068		25.25	0.888235		4.42	0.0604651		4.24	0.102941			4.98	0.483333		4.92	0.745342		25.41	1.35882		4.69	0.274419		4.83	0.897059
5.06	0.125		4.97	0.167702		25.43	0.876471		4.56	0.0651163		4.58	0.107843			5.08	0.466667		5.1	0.776398		25.53	1.34706		4.77	0.288372		5.06	0.931373
5.23	0.133333		5.13	0.180124		25.54	0.941176		4.73	0.0651163		4.85	0.107843			5.13	0.466667		5.31	0.795031		25.72	1.34706		4.94	0.274419		5.31	0.916667
5.39	0.141667		5.25	0.192547		25.9	0.941176		5.06	0.0651163		4.88	0.102941			5.47	0.458333		5.48	0.801242		25.89	1.3		5.27	0.288372		5.54	0.936275
5.68	0.133333		5.54	0.198758		25.99	0.923529		5	0.0604651		5.13	0.112745			5.58	0.45		5.72	0.795031		25.97	1.32941		5.43	0.27907		5.6	0.892157
5.85	0.158333		5.72	0.192547		26.25	0.994118		5.5	0.0604651		5.38	0.0980392			5.85	0.466667		5.85	0.801242		26.33	1.33529		5.5	0.293023		6.03	0.97549
6.06	0.183333		5.91	0.192547		26.44	0.976471		5.49	0.0697674		5.47	0.117647			6.08	0.466667		6.16	0.807453		26.49	1.3		5.78	0.283721		6.2	0.955882
6.25	0.166667		6.19	0.180124		26.51	1.00588		5.66	0.0651163		5.63	0.112745			6.14	0.466667		6.18	0.807453		26.69	1.36471		6	0.274419		6.31	0.97549
6.43	0.15		6.39	0.217391		26.85	1.04706		5.89	0.0604651		5.88	0.122549			6.45	0.483333		6.44	0.832298		26.98	1.32941		6.13	0.297674		6.73	0.970588
6.66	0.183333		6.54	0.198758		26.99	1.02353		6.25	0.0697674		6.02	0.117647			6.6	0.5		6.67	0.795031		27.13	1.30588		6.29	0.288372		6.83	0.941176
6.85	0.175		6.68	0.223602		27.19	1.03529		6.53	0.0651163		6.22	0.117647			6.7	0.508333		6.88	0.84472		27.3	1.27647		6.56	0.297674		6.95	1.0098
7.06	0.175		6.92	0.21118		27.36	1.05294		6.73	0.0651163		6.44	0.112745			6.88	0.541667		7.06	0.838509		27.57	1.31765		6.68	0.283721		7.2	0.980392
7.24	0.175		7.14	0.217391		27.61	1.1		6.89	0.0651163		6.64	0.122549			7.19	0.55		7.27	0.900621		27.68	1.26471		6.98	0.288372		7.48	1.03922
7.63	0.191667		7.27	0.248447		27.87	1.07647		6.97	0.0651163		6.85	0.127451			7.37	0.583333		7.42	0.875776		27.95	1.26471		7.15	0.293023		7.63	1.0098
7.74	0.2		7.52	0.248447		27.97	1.11765		7.17	0.0697674		6.92	0.112745			7.46	0.591667		7.63	0.850932		28.17	1.27647		7.38	0.288372		7.71	1.01471
7.99	0.191667		7.67	0.236025		28.2	1.12353		7.06	0.0604651		7.19	0.112745			7.81	0.641667		7.86	0.89441		28.31	1.26471		7.58	0.306977		7.86	1.02941
8.23	0.225		7.81	0.229814		28.41	1.19412		7.35	0.0651163		7.44	0.127451			7.96	0.658333		8.02	0.84472		28.57	1.25882		7.81	0.302326		8.19	0.995098
8.32	0.208333		7.96	0.273292		28.67	1.16471		7.88	0.0790698		7.59	0.112745			8.14	0.708333		8.23	0.89441		28.68	1.24706		8.09	0.302326		8.45	1.0049
8.53	0.208333		8.25	0.279503		28.77	1.21176		8.04	0.0697674		7.81	0.117647			8.3	0.708333		8.46	0.881988		28.97	1.22941		8.23	0.293023		8.49	1.01471
8.78	0.25		8.42	0.248447		28.99	1.22941		7.85	0.0697674		7.95	0.122549			8.51	0.733333		8.69	0.888199		29	1.27059		8.35	0.325581		8.84	1.01471
8.92	0.241667		8.63	0.236025		29.31	1.2		8.17	0.0697674		8.21	0.122549			8.8	0.716667		8.91	0.89441		29.29	1.24118		8.6	0.293023		9.03	1.05882
9.12	0.258333		8.82	0.254658		29.47	1.30588		8.49	0.0837209		8.29	0.122549			8.9	0.733333		9.1	0.906832		29.48	1.26471		8.77	0.316279		9.05	1.03431
9.31	0.258333		8.93	0.273292		29.65	1.31176		8.63	0.0744186		8.56	0.147059			9.24	0.75		9.24	0.919255		29.63	1.24706		9.07	0.302326		9.37	0.985294
9.56	0.258333		9.16	0.285714		29.92	1.31765		8.78	0.0790698		8.71	0.142157			9.32	0.8		9.48	0.906832		29.92	1.20588		9.2	0.306977		9.37	1.03431
9.74	0.258333		9.43	0.267081		30.07	1.39412		9.01	0.0837209		8.96	0.137255			9.42	0.808333		9.72	0.962733		30.02	1.21176		9.35	0.311628		9.58	1.02941
9.81	0.275		9.6	0.285714		30.27	1.34706		9.26	0.0744186		9.2	0.132353			9.7	0.833333		10	0.993789		30.25	1.25294		9.73	0.302326		9.84	1.02941
10.05	0.258333		9.85	0.273292		30.52	1.35882		9.47	0.0790698		9.49	0.127451			10.09	0.875		10.13	0.981366		30.5	1.17059		9.83	0.306977		10.11	1.06373
10.26	0.291667		10.04	0.291925		30.62	1.4		9.83	0.0744186		9.53	0.127451			10.15	0.841667		10.4	0.981366		30.64	1.19412		9.94	0.32093		10.35	1.05392
10.44	0.3		10.23	0.298137		30.88	1.44118		10.05	0.0744186		9.98	0.151961			10.34	0.875		10.46	1.04348		30.94	1.14706		10.11	0.306977		10.46	1.04902
10.67	0.283333		10.49	0.273292		31	1.45882		10.11	0.0697674		9.96	0.142157			10.7	0.891667		10.68	1.08696		31.07	1.16471		10.46	0.325581		10.85	1.03431
10.87	0.291667		10.66	0.291925		31.28	1.50588		10.46	0.0883721		10.26	0.142157			10.78	0.916667		10.93	1.1118		31.12	1.15882		10.68	0.311628		10.77	1.08333
11.11	0.333333		10.81	0.310559		31.37	1.55294		10.74	0.0883721		10.45	0.147059			10.97	0.891667		11.13	1.09938		31.44	1.16471		10.72	0.302326		11.15	1.04902
11.35	0.308333		11.06	0.31677		31.63	1.60588		10.81	0.0976744		10.74	0.147059			11.21	0.9		11.33	1.17391		31.6	1.11765		11.04	0.302326		11.38	1.06373
11.44	0.325		11.29	0.335404		31.84	1.57647		10.93	0.0883721		10.72	0.147059			11.45	0.9		11.49	1.14286		31.81	1.12941		11.19	0.283721		11.4	1.03922
11.63	0.316667		11.31	0.310559		32.05	1.60588		11.11	0.0790698		10.99	0.142157			11.47	0.916667		11.68	1.25466		32.03	1.14706		11.35	0.311628		11.77	1.03431
11.82	0.325		11.72	0.310559		32.24	1.65294		11.4	0.0790698		11.19	0.161765			11.87	0.933333		11.91	1.27329		32.24	1.17059		11.57	0.311628		11.85	1.07353
11.96	0.325		11.81	0.354037		32.5	1.7		11.58	0.0883721		11.4	0.142157			11.99	0.941667		12.12	1.27329		32.34	1.1		11.88	0.325581		12.16	1.06863
12.22	0.35		12.11	0.329193		32.67	1.66471		11.89	0.0883721		11.51	0.142157			12.16	0.958333		12.35	1.32298		32.63	1.12353		12.05	0.330233		12.27	1.06373
12.48	0.341667		12.13	0.354037		32.8	1.68824		11.99	0.0883721		11.83	0.151961			12.38	1.00833		12.6	1.32919		32.77	1.06471		12.33	0.297674		12.48	1.01471
12.65	0.341667		12.55	0.360248		33.04	1.72941		12.25	0.0883721		11.99	0.181373			12.46	1.00833		12.7	1.36025		32.92	1.05882		12.59	0.311628		12.71	1.04412
12.8	0.333333		12.82	0.360248		33.2	1.76471		12.44	0.0930233		12.2	0.176471			12.8	1.01667		13.01	1.45342		33.35	1.05882		12.61	0.32093		12.92	1.05392
13.1	0.358333		12.72	0.360248		33.48	1.75882		12.63	0.0883721		12.39	0.161765			12.89	1.03333		13.2	1.42857		33.45	1.04706		12.82	0.306977		13.17	1.03922
13.29	0.366667		13.23	0.378882		33.61	1.85882		12.74	0.0790698		12.54	0.147059			13.27	1		13.4	1.49689		33.63	1.07647		13.02	0.316279		13.35	1.05882
13.46	0.366667		13.15	0.391304		33.82	1.90588		13.01	0.102326		12.8	0.142157			13.4	1.00833		13.67	1.47205		33.89	1.06471		13.3	0.288372		13.6	1.04902
13.7	0.358333		13.56	0.397516		34.14	1.97647		13.15	0.0883721		12.99	0.166667			13.55	1.00833		13.81	1.50311		34.1	1.02941		13.47	0.293023		13.64	1.01961
13.9	0.366667		13.55	0.403727		34.22	1.94706		13.47	0.106977		13.2	0.171569			13.81	0.991667		14.02	1.5528		34.22	1.02353		13.67	0.288372		13.93	1.05882
14.02	0.375		13.94	0.385093		34.45	2.05294		13.61	0.0976744		13.42	0.186275			14.02	1.025		14.21	1.50932		34.42	1.00588		13.87	0.274419		14.05	1.02451
14.31	0.391667		14.13	0.409938		34.64	2		13.83	0.106977		13.62	0.171569			14.26	1.05833		14.45	1.54658		34.67	0.982353		13.93	0.297674		14.32	1.0049
14.45	0.416667		14.26	0.403727		34.88	2.05882		13.95	0.0976744		13.7	0.191176			14.5	1.03333		14.58	1.59627		34.87	1.02353		14.33	0.32093		14.64	1.06863
14.64	0.4		14.48	0.391304		35.14	2.05294		14.13	0.102326		14.16	0.181373			14.74	1.075		14.7	1.6646		35.06	1.00588		14.33	0.269767		14.73	1.03922
14.91	0.391667		14.75	0.42236		35.27	2.07647		14.39	0.106977		14.27	0.171569			14.88	1.03333		14.95	1.63354		35.25	0.947059		14.74	0.288372		14.99	1.03431
15.07	0.45		14.95	0.447205		35.48	2.12941		14.56	0.111628		14.65	0.186275			15.2	1.05833		15.16	1.70807		35.45	0.994118		14.8	0.311628		15.1	1.05882
15.29	0.408333		15.13	0.434783		35.74	2.18824		14.76	0.111628		14.78	0.196078			15.41	1.04167		15.34	1.70186		35.62	0.947059		15.07	0.293023		15.35	1.03431
15.4	0.45		15.32	0.459627		35.9	2.20588		14.84	0.106977		14.93	0.210784			15.52	1.00833		15.56	1.70186		35.99	0.952941		15.3	0.283721		15.53	1.01471
15.73	0.441667		15.64	0.447205		36.14	2.24706		15.23	0.116279		15.1	0.191176			15.74	1.025		15.7	1.75155		36.04	0.982353		15.36	0.293023		15.6	1.05392
15.85	0.433333		15.88	0.47205		36.35	2.30588		15.31	0.116279		15.31	0.186275			15.83	1.025		15.92	1.67081		36.27	0.964706		15.53	0.293023		15.9	1.01961
16.07	0.45		16.01	0.478261		36.52	2.35294		15.31	0.116279		15.57	0.20098			16.17	1.00833		16.06	1.75155		36.46	0.929412		15.85	0.288372		16.1	1.01961
16.31	0.425		16.17	0.453416		36.67	2.32353		15.77	0.125581		15.74	0.20098			16.34	1.04167		16.34	1.73913		36.6	0.923529		15.99	0.293023		16.35	0.970588
16.55	0.466667		16.31	0.515528		36.84	2.38235		15.88	0.12093		15.89	0.230392			16.54	1.025		16.49	1.73292		36.84	0.905882		16.23	0.293023		16.49	1.0049
16.63	0.483333		16.48	0.503106		37.2	2.42941		16.16	0.134884		16.02	0.205882			16.63	1.01667		16.7	1.73292		36.99	0.929412		16.38	0.265116		16.76	0.980392
16.94	0.483333		16.72	0.484472		37.28	2.47647		16.37	0.134884		16.29	0.205882			16.87	1		16.94	1.75776		37.19	0.876471		16.57	0.297674		16.99	0.990196
17.13	0.5		17	0.503106		37.36	2.45882		16.42	0.130233		16.4	0.215686			16.98	1.025		17.11	1.72671		37.4	0.858824		16.7	0.283721		17.15	1
17.33	0.475		17.1	0.503106		37.81	2.6		16.78	0.130233		16.7	0.210784			17.22	1.06667		17.26	1.75155		37.59	0.888235		17.01	0.274419		17.4	1.01961
17.66	0.458333		17.35	0.490683		38	2.58235		17.01	0.144186		16.79	0.230392			17.49	1.06667		17.49	1.74534		37.76	0.882353		17.24	0.288372		17.63	1.02451
17.83	0.5		17.55	0.534161		38.08	2.57647		17.15	0.139535		16.95	0.235294			17.56	1.025		17.6	1.76398		37.98	0.841176		17.29	0.27907		17.74	0.970588
18.07	0.516667		17.81	0.52795		38.35	2.61765		17.27	0.130233		17.15	0.230392			17.68	1.00833		17.92	1.75776		38.16	0.835294		17.65	0.246512		18.11	0.995098
18.29	0.491667		17.94	0.521739		38.49	2.61765		17.54	0.130233		17.48	0.220588			17.98	1.025		18.01	1.67702		38.45	0.870588		17.76	0.274419		18.31	0.97549
18.44	0.516667		18.09	0.546584		38.7	2.62941		17.68	0.139535		17.72	0.22549			18.13	1.01667		18.34	1.73913		38.6	0.852941		17.98	0.274419		18.37	0.970588
18.64	0.491667		18.31	0.571429		38.91	2.75882		17.9	0.125581		17.81	0.235294			18.34	0.95		18.46	1.75776		38.92	0.811765		18.31	0.274419		18.6	0.97549
18.81	0.491667		18.42	0.552795		39.06	2.8		18.34	0.153488		18.01	0.235294			18.49	0.966667		18.78	1.74534		39.06	0.841176		18.42	0.288372		18.68	0.95098
19	0.558333		18.66	0.559006		39.27	2.78235		18.38	0.144186		18.24	0.235294			18.73	1.025		18.94	1.74534		39.25	0.782353		18.55	0.283721		19.03	0.960784
19.18	0.558333		19.05	0.559006		39.45	2.80588		18.52	0.148837		18.38	0.254902			18.96	0.95		19.16	1.70186		39.41	0.794118		18.81	0.283721		19.24	0.916667
19.35	0.558333		19.07	0.590062		39.59	2.91765		18.52	0.162791		18.59	0.259804			19.18	1.03333		19.36	1.75776		39.67	0.805882		19.01	0.265116		19.38	0.916667
19.64	0.55		19.22	0.571429		39.95	2.89412		18.83	0.172093		18.78	0.259804			19.31	0.933333		19.52	1.73292		39.86	0.776471		19.33	0.283721		19.56	0.916667
19.8	0.558333		19.46	0.608696		40.08	2.89412		19.27	0.15814		19.03	0.269608			19.58	0.991667		19.79	1.70186		40.08	0.758824		19.42	0.269767		19.76	0.955882
20.02	0.55		19.73	0.627329		40.27	2.93529		19.51	0.176744		19.18	0.27451			19.73	0.991667		19.9	1.68323		40.2	0.764706		19.66	0.269767		19.93	0.901961
20.15	0.558333		19.92	0.608696		40.53	2.97059		19.42	0.167442		19.38	0.27451			19.95	1.025		20.13	1.68944		40.49	0.752941		19.75	0.269767		20.08	0.901961
20.32	0.608333		20.09	0.602484		40.6	3		19.87	0.2		19.62	0.269608			20.09	0.958333		20.33	1.70186		40.6	0.735294		19.95	0.246512		20.28	0.897059
20.52	0.616667		20.35	0.645963		40.96	3.07647		20.02	0.186047		19.79	0.29902			20.49	0.991667		20.55	1.70186		40.77	0.747059		20.13	0.251163		20.46	0.897059
20.58	0.6		20.37	0.621118		41.01	3.02941		20.1	0.181395		20.02	0.303922			20.52	0.958333		20.74	1.6646		41.02	0.723529		20.45	0.251163		20.66	0.911765
20.92	0.616667		20.76	0.621118		41.17	3.17647		20.46	0.190698		20.17	0.29902			20.74	0.9		20.88	1.63354		41.35	0.723529		20.72	0.283721		20.89	0.882353
21.05	0.608333		20.9	0.664596		41.56	3.19412		20.45	0.2		20.44	0.294118			20.94	0.933333		21.11	1.6646		41.35	0.747059		20.83	0.260465		21.16	0.911765
21.27	0.6		21.1	0.645963		41.56	3.21765		20.81	0.176744		20.66	0.313725			21.16	0.9		21.41	1.6646		41.56	0.735294		21.09	0.265116		21.29	0.887255
21.47	0.625		21.34	0.645963		41.83	3.25882		21.02	0.195349		20.82	0.328431			21.35	0.966667		21.6	1.62733		41.76	0.735294		21.25	0.232558		21.54	0.897059
21.63	0.591667		21.36	0.720497		42.04	3.24706		21.24	0.2		20.97	0.333333			21.63	0.916667		21.82	1.65217		41.92	0.694118		21.46	0.24186		21.83	0.887255
21.89	0.65		21.75	0.695652		42.23	3.27647		21.44	0.213953		21.2	0.333333			21.8	0.925		21.98	1.63975		42.14	0.688235		21.62	0.255814		22.02	0.857843
22.06	0.666667		21.95	0.726708		42.43	3.28235		21.48	0.209302		21.52	0.333333			22.04	0.883333		22.13	1.63975		42.26	0.7		21.88	0.246512		22.22	0.901961
22.29	0.641667		22.11	0.732919		42.64	3.24706		21.78	0.218605		21.7	0.338235			22.2	0.916667		22.42	1.54037		42.62	0.7		21.99	0.260465		22.36	0.833333
22.47	0.641667		22.2	0.701863		42.83	3.45294		21.88	0.213953		21.92	0.377451			22.49	0.866667		22.56	1.56522		42.83	0.670588		22.17	0.246512		22.53	0.852941
22.65	0.683333		22.38	0.720497		42.93	3.35882		22.24	0.209302		21.95	0.352941			22.58	0.916667		22.69	1.60248		42.91	0.676471		22.52	0.251163		22.67	0.843137
22.88	0.658333		22.76	0.73913		43.27	3.43529		22.33	0.218605		22.34	0.357843			22.86	0.866667		22.93	1.56522		43.25	0.635294		22.75	0.232558		23.02	0.857843
23.04	0.708333		22.99	0.720497		43.49	3.47647		22.63	0.223256		22.47	0.352941			22.96	0.875		23.13	1.54658		43.35	0.664706		22.85	0.251163		23.2	0.794118
23.27	0.716667		23.18	0.763975		43.6	3.47647		22.86	0.237209		22.7	0.392157			23.2	0.866667		23.31	1.57143		43.56	0.652941		23.04	0.232558		23.31	0.818627
23.48	0.7		23.31	0.770186		43.87	3.54706		23.02	0.227907		22.85	0.382353			23.38	0.875		23.49	1.5528		43.68	0.6		23.31	0.24186		23.56	0.818627
23.7	0.666667		23.63	0.801242		43.99	3.6		23.02	0.24186		23.07	0.401961			23.59	0.875		23.7	1.57764		43.95	0.629412		23.52	0.246512		23.72	0.828431
23.95	0.683333		23.63	0.782609		44.31	3.63529		23.43	0.265116		23.22	0.411765			23.77	0.85		23.9	1.54037		44.06	0.623529		23.68	0.237209		23.81	0.759804
24.03	0.75		23.88	0.832298		44.43	3.58235		23.54	0.260465		23.38	0.436275			23.99	0.825		24.03	1.49068		44.31	0.605882		23.88	0.246512		24.07	0.789216
24.35	0.733333		24.19	0.826087		44.69	3.72941		23.76	0.237209		23.65	0.401961			24.24	0.866667		24.39	1.49068		44.53	0.617647		24.1	0.237209		24.25	0.794118
24.49	0.758333		24.35	0.813665		44.87	3.64118		24.01	0.274419		23.86	0.441176			24.33	0.841667		24.63	1.47826		44.76	0.594118		24.21	0.223256		24.41	0.818627
24.73	0.716667		24.44	0.857143		45.06	3.66471		24.32	0.274419		23.99	0.45098			24.6	0.85		24.79	1.42857		44.89	0.594118		24.53	0.218605		24.66	0.769608
24.99	0.766667		24.68	0.819876		45.31	3.65882		24.41	0.27907		24.27	0.441176			24.75	0.775		24.99	1.42857		45.13	0.588235		24.77	0.227907		24.91	0.789216
25.06	0.791667		25.07	0.89441		45.45	3.71765		24.68	0.274419		24.35	0.480392			25	0.733333		25.22	1.48447		45.35	0.588235		24.95	0.223256		25.09	0.769608
25.35	0.808333		25.15	0.913043		45.63	3.70588		24.79	0.293023		24.59	0.470588			25.22	0.8		25.43	1.40994		45.6	0.576471		25.02	0.223256		25.25	0.754902
25.56	0.791667		25.28	0.881988		45.93	3.76471		24.89	0.32093		25.02	0.504902			25.49	0.8		25.64	1.4472		45.77	0.611765		25.2	0.227907		25.63	0.759804
25.74	0.8		25.51	0.875776		46.03	3.72941		25.16	0.283721		25.16	0.5			25.82	0.783333		25.81	1.45342		45.96	0.617647		25.41	0.2		25.7	0.740196
25.97	0.816667		25.92	0.89441		46.22	3.76471		25.4	0.306977		25.34	0.504902			25.9	0.758333		25.96	1.35404		46.15	0.582353		25.61	0.218605		25.97	0.77451
26.19	0.775		26.06	0.975155		46.45	3.79412		25.7	0.325581		25.49	0.52451			26.02	0.75		26.21	1.39752		46.35	0.570588		25.77	0.209302		26.15	0.769608
26.37	0.816667		26.43	0.925466		46.6	3.75882		25.72	0.325581		25.76	0.534314			26.31	0.791667		26.38	1.31677		46.54	0.570588		26.13	0.227907		26.35	0.764706
26.61	0.833333		26.44	0.931677		46.74	3.77647		25.99	0.330233		25.92	0.573529			26.5	0.775		26.53	1.41615		46.67	0.558824		26.14	0.2		26.64	0.715686
26.76	0.9		26.59	0.919255		47.02	3.81765		26.1	0.35814		26.14	0.578431			26.61	0.725		26.82	1.35404		46.93	0.588235		26.39	0.223256		26.8	0.735294
26.96	0.941667		26.85	0.962733		47.17	3.79412		26.39	0.348837		26.37	0.593137			26.85	0.716667		26.93	1.31677		47.15	0.576471		26.56	0.209302		27.02	0.740196
27.14	0.925		27.06	0.919255		47.43	3.75882		26.44	0.353488		26.5	0.588235			27.04	0.741667		27.13	1.34161		47.26	0.582353		26.8	0.213953		27.27	0.72549
27.31	0.933333		27.32	1.00621		47.6	3.71765		26.68	0.348837		26.71	0.598039			27.2	0.691667		27.35	1.30435		47.52	0.541176		26.93	0.204651		27.43	0.740196
27.65	0.908333		27.35	1.00621		47.81	3.71176		27.07	0.372093		26.85	0.612745			27.37	0.758333		27.57	1.31056		47.77	0.535294		27.2	0.209302		27.72	0.696078
27.85	0.941667		27.55	1		48.06	3.68235		27.24	0.386047		27.04	0.647059			27.7	0.733333		27.74	1.25466		47.92	0.547059		27.43	0.209302		27.77	0.730392
28.02	0.983333		27.86	0.981366		48.17	3.67647		27.23	0.395349		27.29	0.637255			27.82	0.725		27.85	1.27329		48.02	0.541176		27.59	0.2		28.02	0.681373
28.27	0.958333		28.1	1.01863		48.52	3.64118		27.52	0.390698		27.44	0.671569			27.98	0.716667		28.12	1.18012		48.33	0.588235		27.81	0.195349		28.24	0.70098
28.36	0.883333		28.09	1.08075		48.65	3.78235		27.72	0.381395		27.55	0.656863			28.25	0.7		28.27	1.2236		48.46	0.564706		27.98	0.209302		28.42	0.696078
28.63	0.983333		28.34	1.04969		48.88	3.61176		28.09	0.418605		27.77	0.691176			28.45	0.733333		28.47	1.24845		48.7	0.541176		28.2	0.195349		28.57	0.686275
28.81	0.958333		28.52	1.03106		49.05	3.55882		28.23	0.423256		27.99	0.705882			28.63	0.733333		28.77	1.22981		48.9	0.535294		28.48	0.209302		28.65	0.666667
28.98	0.966667		28.77	1.03727		49.23	3.57647		28.49	0.423256		28.13	0.75			28.81	0.725		28.97	1.19255		49.18	0.529412		28.63	0.213953		28.92	0.671569
29.15	1.01667		29.02	1.02484		49.4	3.48824		28.38	0.427907		28.41	0.730392			29.02	0.7		29.15	1.21739		49.43	0.576471		28.88	0.204651		29.15	0.705882
29.41	1.01667		29.09	1.09938		49.54	3.49412		28.86	0.474419		28.61	0.754902			29.2	0.708333		29.32	1.17391		49.48	0.541176		29.02	0.195349		29.27	0.661765
29.63	1.01667		29.3	1.07453		49.67	3.40588		28.85	0.44186		28.81	0.784314			29.22	0.7		29.54	1.17391		49.69	0.576471		29.29	0.190698		29.57	0.651961
29.81	1.04167		29.48	1.04348		49.92	3.31176		29.24	0.474419		29.07	0.794118			29.49	0.708333		29.72	1.18012		49.84	0.570588		29.49	0.186047		29.77	0.647059
29.94	1.05833		29.79	1.15528		50.24	3.27647		29.25	0.497674		29.18	0.833333			29.67	0.675		29.87	1.16149		49.99	0.558824		29.68	0.176744		29.89	0.686275
30.24	1.00833		29.87	1.10559		50.35	3.21765		29.57	0.474419		29.43	0.862745			30.02	0.691667		30.02	1.08696		50.34	0.552941		29.81	0.181395		30.19	0.637255
30.37	1.075		30.23	1.10559		50.56	3.15882		29.63	0.488372		29.62	0.848039			30.06	0.666667		30.31	1.12422		50.42	0.552941		29.95	0.176744		30.48	0.588235
30.64	1.09167		30.27	1.13043		50.81	3.05294		30.11	0.52093		29.88	0.911765			30.41	0.641667		30.45	1.1118		50.67	0.564706		30.1	0.209302		30.68	0.607843
30.71	1.10833		30.38	1.12422		50.94	2.95294		30.12	0.483721		29.95	0.916667			30.57	0.658333		30.75	1.09938		50.89	0.564706		30.39	0.181395		30.81	0.612745
31.02	1.125		30.89	1.1677		51.24	2.9		30.35	0.516279		30.25	0.921569			30.81	0.633333		30.9	1.09317		51.02	0.582353		30.61	0.172093		30.95	0.612745
31.13	1.09167		30.75	1.1677		51.34	2.85882		30.57	0.530233		30.53	0.97549			31.01	0.625		31.19	1.07453		51.29	0.588235		30.77	0.186047		31.19	0.637255
31.44	1.15833		31.14	1.18634		51.63	2.81765		30.69	0.544186		30.58	0.941176			31.13	0.633333		31.31	1.06832		51.43	0.594118		30.95	0.176744		31.31	0.622549
31.53	1.14167		31.38	1.24224		51.81	2.73529		30.98	0.530233		30.76	0.990196			31.35	0.641667		31.52	1.06832		51.58	0.576471		31.1	0.15814		31.49	0.583333
31.75	1.18333		31.33	1.21118		52.01	2.60588		31.17	0.562791		30.98	1.01961			31.45	0.658333		31.7	1.04969		51.86	0.623529		31.4	0.176744		31.67	0.583333
31.9	1.20833		31.59	1.21739		52.19	2.51176		31.27	0.572093		31.17	1.03922			31.77	0.65		31.92	1.0559		52.14	0.605882		31.64	0.167442		31.85	0.602941
32.18	1.16667		32.06	1.25466		52.38	2.45882		31.58	0.572093		31.42	1.09314			32.02	0.6		32.1	1.03106		52.24	0.682353		31.72	0.15814		32.09	0.578431
32.35	1.225		32.11	1.25466		52.59	2.41176		31.84	0.590698		31.56	1.09804			32.2	0.591667		32.29	1.07453		52.46	0.635294		32	0.15814		32.25	0.568627
32.56	1.18333		32.17	1.23602		52.91	2.36471		32	0.637209		31.81	1.09804			32.44	0.633333		32.53	1.03727		52.64	0.641176		32.25	0.144186		32.46	0.563725
32.74	1.275		32.45	1.2795		52.95	2.32353		32.16	0.627907		32.07	1.12745			32.59	0.633333		32.74	0.987578		52.85	0.652941		32.38	0.172093		32.66	0.534314
32.89	1.30833		32.67	1.34783		53.17	2.17059		32.38	0.618605		32.29	1.22549			32.76	0.625		32.94	0.993789		52.99	0.664706		32.7	0.162791		32.97	0.534314
33.13	1.275		32.88	1.30435		53.28	2.10588		32.7	0.669767		32.48	1.21078			33.04	0.633333		33.11	1.01863		53.24	0.7		32.83	0.15814		33.21	0.558824
33.22	1.23333		33.13	1.32298		53.52	2.01176		32.96	0.64186		32.67	1.22059			33.08	0.575		33.34	1.00621		53.41	0.705882		32.99	0.172093		33.38	0.539216
33.57	1.21667		33.17	1.2795		53.7	1.96471		33.04	0.660465		32.85	1.27941			33.35	0.608333		33.52	0.944099		53.6	0.717647		33.41	0.162791		33.66	0.514706
33.71	1.33333		33.49	1.37888		53.94	1.98824		33.28	0.651163		33.04	1.29412			33.57	0.55		33.73	0.956522		53.79	0.741176		33.68	0.162791		33.78	0.529412
34.01	1.35833		33.57	1.31056		54.27	1.86471		33.36	0.697674		33.11	1.30882			33.8	0.558333		33.96	0.993789		54.02	0.758824		33.8	0.148837		33.97	0.490196
34.14	1.36667		33.91	1.37267		54.39	1.83529		33.7	0.739535		33.38	1.36765			34.02	0.55		34.1	0.962733		54.22	0.770588		33.95	0.148837		34.17	0.519608
34.31	1.33333		33.82	1.37888		54.55	1.77647		33.86	0.734884		33.63	1.37745			34.19	0.608333		34.31	0.931677		54.42	0.823529		34.24	0.153488		34.33	0.490196
34.49	1.35		34.14	1.38509		54.77	1.67647		34.1	0.739535		33.77	1.41176			34.34	0.608333		34.49	0.925466		54.65	0.829412		34.27	0.15814		34.62	0.495098
34.71	1.36667		34.27	1.40373		54.91	1.70588		34.22	0.762791		34.01	1.48039			34.56	0.525		34.7	0.900621		54.84	0.847059		34.48	0.139535		34.79	0.514706
34.9	1.45		34.75	1.43478		55.13	1.56471		34.52	0.776744		34.15	1.48529			34.74	0.566667		34.92	0.84472		55.07	0.888235		34.7	0.148837		35.06	0.470588
35.07	1.39167		34.84	1.45963		55.31	1.61176		34.56	0.772093		34.45	1.4902			35.01	0.541667		35.14	0.931677		55.15	0.870588		34.92	0.148837		35.27	0.470588
35.31	1.45833		35.07	1.40373		55.52	1.52353		34.88	0.762791		34.69	1.51471			35.2	0.55		35.27	0.881988		55.44	0.882353		35.06	0.144186		35.51	0.460784
35.56	1.48333		35.07	1.49689		55.74	1.48235		34.96	0.762791		34.71	1.56373			35.41	0.55		35.52	0.869565		55.61	0.935294		35.23	0.144186		35.59	0.465686
35.74	1.44167		35.53	1.49689		55.99	1.4		35.15	0.804651		35.05	1.65686			35.51	0.55		35.75	0.869565		55.88	0.935294		35.45	0.139535		35.74	0.495098
35.84	1.49167		35.45	1.50932		56.07	1.40588		35.38	0.813953		35.17	1.60784			35.78	0.55		36.02	0.875776		55.97	0.988235		35.71	0.144186		35.99	0.470588
36.1	1.54167		35.99	1.45342		56.31	1.37059		35.56	0.846512		35.49	1.70588			36.06	0.516667		36.3	0.881988		56.2	0.970588		35.81	0.148837		36.16	0.421569
36.22	1.45833		36.06	1.51553		56.48	1.3		35.81	0.804651		35.7	1.7598			36.06	0.516667		36.38	0.875776		56.4	0.994118		36.06	0.116279		36.39	0.455882
36.49	1.55		36.22	1.56522		56.69	1.35882		35.97	0.860465		35.99	1.76961			36.56	0.516667		36.58	0.84472		56.51	1.03529		36.3	0.144186		36.6	0.446078
36.77	1.53333		36.51	1.59627		56.97	1.34706		36.17	0.84186		36.14	1.77451			36.62	0.55		36.79	0.84472		56.71	1.00588		36.47	0.12093		36.8	0.436275
36.9	1.56667		36.71	1.63354		57.18	1.3		36.18	0.84186		36.27	1.80882			36.88	0.483333		36.95	0.826087		56.97	1.04118		36.53	0.139535		36.95	0.460784
37.08	1.50833		36.79	1.65217		57.41	1.28235		36.6	0.893023		36.49	1.92647			37.03	0.516667		37.14	0.819876		57.1	1.05882		36.88	0.134884		37.15	0.416667
37.32	1.54167		37.1	1.6646		57.51	1.25882		36.71	0.902326		36.77	1.87745			37.21	0.491667		37.33	0.795031		57.32	1.08824		37	0.130233		37.34	0.411765
37.64	1.50833		37.27	1.59627		57.64	1.23529		36.88	0.906977		36.91	2.02451			37.45	0.483333		37.55	0.838509		57.62	1.1		37.19	0.130233		37.54	0.377451
37.89	1.65833		37.43	1.68323		57.88	1.26471		37.13	0.888372		37.1	2.01961			37.63	0.475		37.74	0.801242		57.68	1.11176		37.38	0.12093		37.78	0.421569
38.06	1.59167		37.63	1.65217		58.1	1.22353		37.42	0.925581		37.32	2.07843			37.8	0.5		37.93	0.795031		57.88	1.1		37.64	0.125581		38	0.406863
38.28	1.7		37.77	1.67081		58.36	1.24706		37.5	0.916279		37.54	2.06863			37.92	0.475		38.09	0.782609		58.17	1.14706		37.75	0.102326		38.22	0.406863
38.49	1.7		37.95	1.74534		58.56	1.21765		37.67	0.930233		37.67	2.19118			38.26	0.458333		38.35	0.757764		58.26	1.12941		38.04	0.125581		38.42	0.401961
38.68	1.70833		38.26	1.78882		58.59	1.26471		38.02	0.962791		37.87	2.15196			38.39	0.508333		38.49	0.763975		58.52	1.18235		38.17	0.125581		38.63	0.372549
38.86	1.7		38.44	1.81366		58.85	1.23529		38.02	0.95814		38.02	2.20098			38.58	0.508333		38.66	0.732919		58.82	1.18235		38.49	0.106977		38.67	0.397059
39.03	1.70833		38.56	1.78261		59.16	1.25882		38.3	0.972093		38.26	2.28922			38.68	0.466667		38.85	0.751553		58.94	1.17647		38.63	0.111628		38.87	0.372549
39.25	1.75833		38.89	1.80745		59.23	1.18824		38.53	0.981395		38.35	2.26471			38.95	0.475		39.1	0.770186		59.1	1.22941		38.81	0.12093		39.08	0.377451
39.48	1.7		39.17	1.92547		59.38	1.22941		38.67	0.990698		38.61	2.31863			39.11	0.466667		39.29	0.757764		59.39	1.18824		39.08	0.12093		39.31	0.372549
39.61	1.75833		39.13	1.87578		59.77	1.19412		38.99	1.05116		38.79	2.38235			39.42	0.475		39.5	0.73913		59.56	1.19412		39.17	0.111628		39.56	0.377451
39.87	1.79167		39.32	1.90683		59.9	1.21176		39.31	1.03721		39	2.37745			39.49	0.466667		39.73	0.757764		59.67	1.18235		39.3	0.111628		39.77	0.352941
40.06	1.81667		39.6	1.93168		60.12	1.17059		39.35	1.0093		39.27	2.45588			39.73	0.5		39.91	0.726708		59.94	1.27647		39.46	0.116279		40	0.352941
40.17	1.76667		40.02	1.91925		60.35	1.21176		39.59	0.976744		39.44	2.48529			39.92	0.475		40.15	0.708075		60.12	1.24118		39.74	0.116279		40.2	0.323529
40.39	1.775		40	1.97516		60.52	1.16471		39.66	1.0186		39.6	2.52941			40.2	0.45		40.3	0.720497		60.27	1.23529		39.95	0.106977		40.42	0.318627
40.54	1.81667		40.36	2.03106		60.71	1.19412		39.79	1.04651		39.8	2.53922			40.34	0.458333		40.42	0.732919		60.58	1.25294		40.13	0.116279		40.61	0.318627
40.75	1.85		40.41	1.96273		60.73	1.14118		40.3	1.05116		39.98	2.64706			40.6	0.45		40.74	0.701863		60.69	1.29412		40.37	0.102326		40.73	0.343137
40.97	1.81667		40.79	2.09317		61.07	1.21765		40.13	1.07907		40.1	2.68137			40.77	0.433333		40.88	0.714286		60.97	1.27647		40.56	0.0976744		40.97	0.323529
41.13	1.85833		40.82	2.09317		61.32	1.13529		40.52	1.07907		40.42	2.70588			40.94	0.441667		41.06	0.664596		61.2	1.24118		40.8	0.111628		41.11	0.323529
41.31	1.85		41.3	2.13043		61.54	1.22353		40.79	1.02791		40.63	2.76471			41.13	0.491667		41.3	0.695652		61.32	1.27059		40.99	0.12093		41.42	0.308824
41.49	1.94167		41.31	2.17391		61.69	1.24706		41.04	1.08372		40.77	2.81373			41.33	0.458333		41.45	0.677019		61.55	1.24118		41.32	0.111628		41.61	0.313725
41.75	1.90833		41.53	2.19876		61.86	1.21176		41.38	1.07442		40.96	2.85784			41.47	0.466667		41.66	0.664596		61.69	1.26471		41.35	0.106977		41.8	0.318627
41.95	1.85833		41.73	2.19255		62.01	1.17059		41.47	1.13023		41.2	2.86275			41.78	0.45		41.85	0.677019		61.96	1.27647		41.67	0.106977		41.96	0.308824
42.12	1.95833		41.92	2.16149		62.25	1.20588		41.56	1.11628		41.42	2.93137			41.98	0.491667		42.07	0.677019		62.12	1.28235		41.83	0.0930233		42.23	0.279412
42.3	1.925		42.24	2.27329		62.5	1.22353		41.8	1.09302		41.59	2.93137			42.12	0.45		42.27	0.621118		62.17	1.26471		42.1	0.111628		42.38	0.279412
42.49	1.875		42.26	2.30435		62.6	1.2		41.92	1.09302		41.75	2.93137			42.4	0.433333		42.38	0.63354		62.51	1.28824		42.3	0.106977		42.52	0.308824
42.69	1.925		42.69	2.28571		62.8	1.15882		42.11	1.11628		42.02	3.03922			42.61	0.475		42.59	0.664596		62.64	1.22353		42.45	0.111628		42.71	0.269608
43	1.95		42.9	2.28571		62.98	1.15294		42.42	1.11163		42.23	3.09314			42.74	0.416667		42.85	0.645963		62.91	1.25294		42.63	0.102326		42.91	0.284314
43.12	2.01667		42.78	2.3913		63.24	1.21765		42.52	1.09767		42.4	3.13725			42.9	0.433333		43.02	0.608696		63.19	1.26471		42.74	0.0976744		43.17	0.259804
43.3	1.98333		43.1	2.41615		63.41	1.20588		42.76	1.10698		42.63	3.15686			43.2	0.441667		43.31	0.614907		63.37	1.28824		42.97	0.106977		43.31	0.259804
43.59	1.95		43.25	2.43478		63.61	1.18824		42.98	1.10233		42.76	3.14216			43.36	0.425		43.45	0.621118		63.5	1.22353		43.1	0.102326		43.59	0.25
43.82	2.00833		43.42	2.46584		63.84	1.24118		43.27	1.09767		43.01	3.15686			43.49	0.458333		43.68	0.627329		63.68	1.25294		43.43	0.0976744		43.67	0.27451
43.99	2.09167		43.53	2.42236		64.01	1.18235		43.41	1.10233		43.23	3.19118			43.76	0.45		43.85	0.652174		63.89	1.24706		43.6	0.106977		43.94	0.240196
44.17	2.05833		43.89	2.47205		64.21	1.18824		43.63	1.08837		43.41	3.26961			43.95	0.433333		44.09	0.63354		64.02	1.25294		43.85	0.102326		44.17	0.240196
44.34	2.01667		44.1	2.55901		64.4	1.18824		43.94	1.08372		43.61	3.30882			44.19	0.458333		44.29	0.658385		64.19	1.26471		44.07	0.0976744		44.38	0.240196
44.56	2.01667		44.27	2.52795		64.64	1.22941		44.1	1.12558		43.78	3.30392			44.27	0.416667		44.56	0.63354		64.49	1.25294		44.36	0.0930233		44.5	0.245098
44.67	2.01667		44.57	2.59006		64.85	1.20588		44.19	1.08837		43.92	3.28431			44.57	0.475		44.67	0.645963		64.68	1.24706		44.51	0.0930233		44.7	0.245098
44.85	2.01667		44.84	2.6087		64.95	1.17647		44.35	1.10698		44.18	3.31373			44.69	0.45		44.86	0.63354		64.82	1.20588		44.77	0.111628		44.93	0.230392
45.11	2.09167		44.67	2.63354		65.17	1.19412		44.53	1.11163		44.43	3.38725			44.95	0.45		45.09	0.639752		65.13	1.28824		44.87	0.0976744		45.13	0.25
45.32	2.1		45.17	2.65217		65.32	1.21765		44.81	1.13488		44.62	3.44118			45.09	0.441667		45.31	0.63354		65.27	1.25882		45.06	0.102326		45.4	0.240196
45.45	2.1		45.35	2.68944		65.55	1.21176		45.03	1.06977		44.82	3.46078			45.35	0.458333		45.54	0.68323		65.4	1.27647		45.27	0.0976744		45.55	0.245098
45.77	2.10833		45.45	2.6646		65.75	1.22353		45.2	1.08372		44.99	3.4951			45.47	0.483333		45.7	0.639752		65.6	1.21765		45.57	0.106977		45.76	0.215686
45.96	2.1		45.6	2.75155		65.94	1.19412		45.33	1.08837		45.16	3.5049			45.7	0.441667		45.85	0.645963		65.72	1.20588		45.65	0.0976744		46.02	0.259804
46.18	2.1		45.91	2.73292		66.2	1.19412		45.58	1.07907		45.35	3.60294			45.81	0.466667		46.06	0.627329		66.07	1.23529		45.98	0.0976744		46.09	0.235294
46.39	2.05		45.94	2.84472		66.34	1.22941		45.69	1.07907		45.67	3.54902			46.03	0.466667		46.31	0.639752		66.24	1.22353		46.06	0.0930233		46.33	0.25
46.57	2.10833		46.4	2.83851		66.6	1.22353		46.08	1.03721		45.81	3.53431			46.3	0.466667		46.49	0.608696		66.47	1.2		46.3	0.102326		46.54	0.245098
46.78	2.05		46.6	2.7764		66.73	1.24118		46.25	1.07442		46.01	3.58824			46.52	0.491667		46.72	0.608696		66.6	1.29412		46.48	0.0930233		46.86	0.235294
46.99	2.06667		46.79	2.90683		66.96	1.21765		46.31	1.06512		46.3	3.65196			46.7	0.475		46.89	0.645963		66.84	1.25294		46.67	0.0930233		46.93	0.240196
47.16	2.06667		46.94	2.88199		67.1	1.22353		46.74	1.0186		46.45	3.62255			46.91	0.516667		47.15	0.627329		67.08	1.25882		46.91	0.0976744		47.15	0.240196
47.31	2.075		47.35	2.91925		67.37	1.22941		46.86	1.02326		46.72	3.59804			47.18	0.466667		47.34	0.639752		67.26	1.31765		47.15	0.0976744		47.4	0.230392
47.66	2.075		47.31	2.89441		67.56	1.25882		46.95	1.03256		46.96	3.71078			47.42	0.483333		47.63	0.670807		67.45	1.3		47.2	0.0930233		47.63	0.245098
47.75	2.01667		47.57	2.8323		67.79	1.25294		47.21	0.967442		47.08	3.66667			47.65	0.483333		47.86	0.689441		67.62	1.30588		47.43	0.0930233		47.84	0.235294
48.07	2.09167		47.6	2.86957		68.04	1.24118		47.54	0.944186		47.33	3.62745			47.85	0.483333		48.06	0.68323		67.82	1.36471		47.63	0.111628		48.04	0.245098
48.26	2.00833		48.1	2.98137		68.17	1.30588		47.52	0.972093		47.54	3.60784			47.99	0.541667		48.21	0.695652		67.94	1.30588		47.81	0.102326		48.19	0.235294
48.45	2		48.11	2.89441		68.36	1.27059		47.7	0.916279		47.7	3.58824			48.22	0.55		48.44	0.670807		68.14	1.31176		48.02	0.0976744		48.39	0.230392
48.66	1.95		48.27	2.90062		68.54	1.3		47.9	0.906977		47.9	3.63235			48.41	0.516667		48.53	0.695652		68.39	1.34706		48.26	0.106977		48.52	0.235294
48.88	1.95833		48.74	2.8882		68.7	1.27647		47.99	0.92093		48.05	3.61275			48.65	0.525		48.74	0.701863		68.62	1.26471		48.43	0.102326		48.77	0.235294
49.05	1.9		48.69	2.90683		69.01	1.24706		48.34	0.916279		48.29	3.62745			48.7	0.566667		48.97	0.677019		68.8	1.35882		48.65	0.111628		48.95	0.230392
49.29	1.875		48.83	2.9441		69.1	1.32353		48.37	0.925581		48.45	3.54412			49.08	0.558333		49.18	0.726708		69.01	1.30588		48.78	0.116279		49.23	0.240196
49.43	1.83333		49.31	2.9441		69.32	1.31765		48.88	0.846512		48.66	3.5049			49.22	0.55		49.35	0.701863		69.2	1.35882		48.85	0.0930233		49.38	0.235294
49.59	1.825		49.45	2.91304		69.55	1.34706		49.02	0.832558		48.71	3.45588			49.38	0.541667		49.54	0.73913		69.28	1.35294		49.08	0.0976744		49.47	0.235294
49.77	1.89167		49.48	2.88199		69.68	1.31176		49.2	0.827907		49.03	3.44608			49.54	0.566667		49.7	0.726708		69.63	1.35882		49.36	0.102326		49.84	0.245098
49.95	1.74167		49.7	2.86957		69.87	1.32941		49.37	0.767442		49.2	3.47549			49.77	0.575		49.85	0.73913		69.77	1.34118		49.54	0.111628		50.01	0.254902
50.24	1.68333		49.97	2.82609		70.11	1.32353		49.5	0.804651		49.43	3.38725			49.95	0.583333		50.1	0.726708		69.97	1.36471		49.74	0.106977		50.24	0.245098
50.36	1.75		50.19	2.78261		70.33	1.36471		49.62	0.75814		49.65	3.33333			50.17	0.575		50.27	0.751553		70.1	1.35294		49.89	0.111628		50.34	0.245098
50.56	1.65		50.37	2.7764		70.53	1.31765		49.77	0.697674		49.84	3.28922			50.28	0.6		50.53	0.751553		70.3	1.42941		50.19	0.102326		50.58	0.264706
50.71	1.65		50.29	2.75776		70.68	1.4		50.19	0.697674		50.01	3.28431			50.42	0.566667		50.7	0.726708		70.6	1.45294		50.42	0.116279		50.84	0.269608
50.91	1.625		50.79	2.75776		70.82	1.4		50.2	0.669767		50.26	3.23039			50.7	0.591667		50.87	0.770186		70.78	1.44706		50.64	0.125581		51.01	0.264706
51.09	1.59167		50.86	2.63975		71.14	1.36471		50.59	0.655814		50.41	3.22059			50.78	0.616667		51.13	0.78882		70.98	1.37647		50.85	0.106977		51.17	0.289216
51.34	1.55		51.03	2.65217		71.27	1.41176		50.98	0.64186		50.62	3.07843			51.08	0.625		51.24	0.782609		71.1	1.46471		51.01	0.12093		51.29	0.284314
51.51	1.45833		51.2	2.62112		71.42	1.41765		50.76	0.586047		50.85	3.02941			51.35	0.658333		51.45	0.757764		71.25	1.42941		51.13	0.12093		51.63	0.284314
51.79	1.45833		51.56	2.6646		71.65	1.42353		51.4	0.576744		50.96	3.0049			51.53	0.625		51.66	0.813665		71.6	1.45294		51.41	0.12093		51.81	0.29902
51.92	1.46667		51.47	2.63975		71.83	1.41765		51.47	0.586047		51.23	3.0098			51.63	0.591667		51.84	0.807453		71.7	1.46471		51.63	0.134884		51.99	0.289216
52.14	1.35		51.81	2.59627		72.07	1.46471		51.36	0.553488		51.31	2.90196			51.87	0.633333		52	0.795031		71.98	1.48824		51.85	0.12093		52.11	0.289216
52.29	1.28333		52.1	2.57764		72.24	1.42941		51.76	0.511628		51.52	2.79412			52.06	0.608333		52.17	0.807453		72.13	1.48235		51.98	0.139535		52.36	0.284314
52.56	1.26667		52.34	2.45963		72.51	1.48824		51.91	0.497674		51.7	2.71569			52.35	0.666667		52.35	0.801242		72.31	1.48824		52.14	0.125581		52.53	0.318627
52.66	1.19167		52.45	2.45963		72.67	1.5		52.02	0.497674		51.89	2.65686			52.53	0.616667		52.62	0.863354		72.51	1.52941		52.38	0.139535		52.62	0.308824
52.94	1.175		52.51	2.37267		72.84	1.40588		52.36	0.44186		52.14	2.62745			52.58	0.591667		52.84	0.807453		72.72	1.51765		52.61	0.125581		52.95	0.333333
53.1	1.15		52.75	2.32919		73.05	1.5		52.56	0.437209		52.38	2.57353			52.86	0.616667		52.95	0.838509		72.95	1.54118		52.77	0.134884		53.09	0.323529
53.26	1.19167		53.03	2.27329		73.25	1.54706		52.67	0.390698		52.58	2.42157			53.06	0.633333		53.22	0.863354		73.15	1.54706		52.95	0.148837		53.35	0.352941
53.54	1.15		53.33	2.23602		73.39	1.48824		52.87	0.395349		52.73	2.38725			53.2	0.641667		53.41	0.832298		73.22	1.57647		53.21	0.148837		53.59	0.348039
53.67	1.025		53.43	2.19876		73.59	1.56471		53.1	0.362791		52.98	2.36765			53.52	0.641667		53.64	0.888199		73.63	1.54706		53.34	0.15814		53.67	0.357843
53.99	1.05		53.57	2.11801		73.87	1.48824		53.44	0.362791		53.26	2.28431			53.64	0.658333		53.85	0.863354		73.67	1.64118		53.63	0.162791		53.85	0.377451
54.13	1.03333		54	2.08696		74.02	1.58235		53.56	0.348837		53.39	2.21078			53.9	0.658333		54.02	0.850932		73.9	1.62941		53.82	0.15814		54.14	0.382353
54.33	1		54.11	2.08075		74.16	1.53529		53.82	0.339535		53.61	2.08333			54.09	0.625		54.23	0.838509		74.1	1.64118		54	0.176744		54.38	0.382353
54.55	0.9		54.24	2.06211		74.4	1.57059		54.05	0.32093		53.72	2.07843			54.25	0.65		54.37	0.838509		74.25	1.61765		54.2	0.162791		54.52	0.392157
54.74	0.925		54.42	2		74.67	1.57647		54.3	0.311628		53.99	2.0049			54.49	0.633333		54.62	0.863354		74.44	1.65294		54.35	0.190698		54.77	0.406863
54.96	0.866667		54.63	1.85714		74.81	1.61176		54.39	0.293023		54.27	1.91667			54.7	0.666667		54.85	0.832298		74.72	1.68235		54.58	0.181395		54.92	0.411765
55.13	0.858333		54.85	1.8323		75	1.66471		54.7	0.302326		54.33	1.85294			54.94	0.666667		55.03	0.84472		74.84	1.73529		54.86	0.195349		55.13	0.416667
55.33	0.808333		55.06	1.81366		75.24	1.69412		54.85	0.27907		54.6	1.73529			55.08	0.675		55.22	0.819876		74.98	1.70588		55.07	0.2		55.38	0.441176
55.55	0.825		55.34	1.72671		75.42	1.68824		55.1	0.27907		54.88	1.71569			55.31	0.633333		55.43	0.78882		75.24	1.78235		55.26	0.2		55.57	0.446078
55.71	0.841667		55.57	1.69565		75.6	1.68235		55.18	0.283721		55	1.59804			55.5	0.591667		55.64	0.832298		75.4	1.72941		55.5	0.2		55.69	0.45098
55.9	0.75		55.54	1.6087		75.83	1.72353		55.45	0.269767		55.17	1.52451			55.72	0.65		55.81	0.807453		75.7	1.72353		55.6	0.2		55.92	0.455882
56.1	0.733333		55.97	1.60248		76.03	1.7		55.74	0.24186		55.35	1.51471			55.85	0.666667		55.98	0.838509		75.85	1.78824		55.83	0.213953		56.07	0.426471
56.3	0.75		56.15	1.49068		76.2	1.72941		55.85	0.265116		55.57	1.48039			56.06	0.666667		56.21	0.819876		76.04	1.78824		56.02	0.232558		56.24	0.436275
56.45	0.716667		56.33	1.48447		76.34	1.72941		55.95	0.260465		55.66	1.41176			56.31	0.633333		56.43	0.770186		76.2	1.84118		56.31	0.195349		56.56	0.446078
56.74	0.683333		56.52	1.39752		76.63	1.75882		56.17	0.255814		55.99	1.34314			56.44	0.65		56.63	0.813665		76.35	1.82353		56.45	0.232558		56.67	0.47549
56.92	0.725		56.88	1.38509		76.77	1.74706		56.36	0.232558		56.14	1.29412			56.56	0.616667		56.84	0.763975		76.63	1.9		56.68	0.223256		56.9	0.446078
57.14	0.683333		57.04	1.32298		77.01	1.72941		56.48	0.246512		56.36	1.27451			56.81	0.625		56.99	0.782609		76.82	1.85882		56.8	0.246512		56.97	0.455882
57.28	0.641667		57.35	1.21739		77.25	1.82353		56.67	0.260465		56.54	1.18627			57.12	0.641667		57.23	0.745342		77.02	1.89412		56.99	0.218605		57.3	0.455882
57.59	0.691667		57.33	1.14286		77.39	1.84118		56.86	0.251163		56.74	1.09314			57.23	0.65		57.43	0.726708		77.24	1.90588		57.17	0.237209		57.52	0.47549
57.81	0.616667		57.35	1.13665		77.6	1.84706		57.15	0.255814		57.1	1.08333			57.41	0.65		57.67	0.73913		77.37	1.95882		57.27	0.232558		57.7	0.47549
58	0.616667		57.81	1.08075		77.78	1.92353		57.23	0.223256		57.25	1.03922			57.63	0.633333		57.81	0.720497		77.63	1.99412		57.48	0.24186		57.86	0.455882
58.16	0.625		58.02	1.03106		77.93	1.86471		57.46	0.246512		57.52	0.946078			57.87	0.641667		58.02	0.720497		77.69	2.04706		57.77	0.255814		58.17	0.470588
58.34	0.65		58.1	1.02484		78.12	1.94706		57.74	0.251163		57.59	0.990196			58.05	0.633333		58.18	0.695652		77.99	2.01176		57.97	0.237209		58.34	0.485294
58.63	0.616667		58.3	0.993789		78.32	1.90588		57.81	0.251163		57.78	0.931373			58.36	0.591667		58.38	0.701863		78.24	2.06471		58.06	0.265116		58.58	0.490196
58.76	0.633333		58.53	0.931677		78.6	1.94706		58.02	0.246512		58.08	0.901961			58.45	0.616667		58.61	0.670807					58.35	0.269767		58.69	0.470588
58.99	0.566667		58.62	0.881988					58.31	0.255814		58.24	0.872549			58.64	0.591667		58.94	0.639752					58.56	0.260465		58.9	0.480392
59.13	0.583333		58.79	0.826087					58.54	0.269767		58.41	0.843137			58.92	0.608333		59.15	0.627329					58.77	0.255814		59.15	0.485294
59.42	0.583333		59.15	0.813665					58.82	0.255814		58.62	0.803922			59.1	0.6		59.31	0.590062					58.94	0.274419		59.34	0.485294
59.54	0.608333		59.47	0.813665					58.77	0.260465		58.74	0.764706			59.24	0.566667		59.46	0.621118					59.2	0.255814		59.65	0.47549
59.85	0.55		59.45	0.73913					59.11	0.269767		58.92	0.759804			59.51	0.591667		59.67	0.627329					59.34	0.274419		59.7	0.455882
59.94	0.591667		59.73	0.701863					59.23	0.251163		59.18	0.696078			59.72	0.583333		59.91	0.608696					59.52	0.255814		60.06	0.45098
60.14	0.558333		59.95	0.714286					59.38	0.260465		59.31	0.730392			59.85	0.591667		60.08	0.590062					59.75	0.265116		60.24	0.47549
60.34	0.566667		60.03	0.652174					59.55	0.260465		59.49	0.720588			60.14	0.625		60.29	0.540373					59.85	0.265116		60.45	0.455882
60.53	0.566667		60.19	0.639752					59.94	0.27907		59.77	0.696078			60.34	0.6		60.52	0.565217					60.08	0.269767		60.6	0.460784
60.73	0.566667		60.47	0.639752					60.26	0.255814		59.98	0.676471			60.47	0.6		60.71	0.571429					60.37	0.246512		60.75	0.446078
60.93	0.558333		60.55	0.571429					60.45	0.251163		60.16	0.637255			60.63	0.608333		60.86	0.540373					60.52	0.283721		60.94	0.47549
61.1	0.591667		60.83	0.559006					60.61	0.269767		60.34	0.622549			60.87	0.625		61.05	0.521739					60.68	0.265116		61.16	0.455882
61.3	0.6		61.02	0.565217					60.77	0.27907		60.6	0.627451			61.04	0.575		61.24	0.503106					60.93	0.255814		61.31	0.455882
61.43	0.591667		61.34	0.552795					60.95	0.269767		60.74	0.607843			61.24	0.6		61.49	0.490683					61.13	0.255814		61.6	0.47549
61.67	0.55		61.53	0.521739					61.33	0.274419		61	0.598039			61.46	0.575		61.64	0.490683					61.3	0.274419		61.78	0.465686
61.88	0.558333		61.64	0.515528					61.27	0.306977		61.1	0.568627			61.67	0.608333		61.88	0.490683					61.49	0.274419		61.96	0.45098
62.03	0.55		61.91	0.509317					61.63	0.260465		61.39	0.607843			61.82	0.566667		61.96	0.503106					61.73	0.265116		62.1	0.431373
62.22	0.575		62.19	0.521739					61.69	0.260465		61.57	0.583333			62.06	0.575		62.2	0.453416					61.88	0.251163		62.3	0.465686
62.49	0.575		62.37	0.440994					61.85	0.27907		61.77	0.52451			62.25	0.575		62.39	0.490683					62.06	0.260465		62.45	0.465686
62.66	0.575		62.33	0.459627					62.2	0.269767		61.88	0.519608			62.39	0.566667		62.56	0.496894					62.42	0.265116		62.64	0.436275
62.87	0.55		62.54	0.465839					62.06	0.269767		62.15	0.529412			62.66	0.575		62.8	0.459627					62.58	0.27907		62.91	0.446078
63.06	0.558333		62.95	0.447205					62.54	0.265116		62.38	0.514706			62.87	0.591667		62.92	0.465839					62.74	0.274419		63.08	0.45098
63.21	0.591667		63.01	0.434783					62.68	0.27907		62.6	0.509804			63.02	0.575		63.18	0.434783					62.95	0.283721		63.27	0.416667
63.42	0.591667		63.33	0.42236					62.76	0.265116		62.8	0.52451			63.3	0.566667		63.38	0.453416					63.22	0.260465		63.45	0.446078
63.64	0.566667		63.45	0.416149					63.01	0.255814		62.88	0.52451			63.39	0.6		63.53	0.416149					63.38	0.293023		63.72	0.47549
63.85	0.6		63.53	0.409938					63.3	0.27907		63.14	0.485294			63.57	0.6		63.69	0.403727					63.64	0.288372		63.8	0.455882
64.03	0.533333		63.93	0.447205					63.37	0.260465		63.35	0.495098			63.76	0.583333		63.88	0.434783					63.77	0.288372		64.16	0.446078
64.32	0.625		64.11	0.447205					63.59	0.265116		63.59	0.5			63.93	0.575		64.17	0.434783					63.9	0.27907		64.31	0.431373
64.5	0.616667		64.21	0.397516					63.81	0.255814		63.69	0.514706			64.1	0.591667		64.31	0.416149					64.11	0.27907		64.41	0.446078
64.66	0.6		64.52	0.440994					64.06	0.255814		63.88	0.490196			64.45	0.566667		64.53	0.397516					64.29	0.27907		64.64	0.441176
64.95	0.608333		64.72	0.428571					64.38	0.255814		64.06	0.460784			64.46	0.608333		64.71	0.409938					64.5	0.283721		64.87	0.441176
65.1	0.666667		64.99	0.428571					64.68	0.293023		64.34	0.47549			64.77	0.616667		64.92	0.403727					64.69	0.288372		65.06	0.426471
65.29	0.6		65.04	0.428571					64.72	0.293023		64.54	0.495098			64.93	0.633333		65.13	0.409938					64.95	0.283721		65.31	0.431373
65.48	0.616667		65.25	0.409938					65.03	0.297674		64.7	0.465686			65.2	0.566667		65.33	0.42236					65.09	0.297674		65.43	0.431373
65.67	0.608333		65.45	0.416149					65.17	0.288372		64.91	0.47549			65.35	0.633333		65.57	0.391304					65.32	0.283721		65.65	0.446078
65.88	0.616667		65.61	0.416149					65.45	0.265116		65.17	0.495098			65.54	0.666667		65.72	0.409938					65.56	0.269767		65.9	0.421569
65.99	0.625		65.86	0.403727					65.52	0.265116		65.25	0.47549			65.75	0.608333		65.99	0.447205					65.82	0.27907		66.04	0.411765
66.2	0.625		66.04	0.403727					65.85	0.293023		65.52	0.470588			66.02	0.641667		66.17	0.403727					65.93	0.293023		66.26	0.45098
66.46	0.633333		66.26	0.428571					65.85	0.306977		65.72	0.460784			66.2	0.641667		66.31	0.409938					66.27	0.265116		66.49	0.426471
66.7	0.675		66.47	0.428571					66.15	0.283721		65.94	0.460784			66.38	0.633333		66.52	0.42236					66.31	0.274419		66.64	0.431373
66.85	0.658333		66.66	0.378882					66.38	0.302326		66.15	0.45098			66.52	0.641667		66.79	0.478261					66.63	0.302326		66.89	0.436275
66.99	0.675		66.79	0.397516					66.49	0.302326		66.38	0.460784			66.74	0.633333		66.94	0.409938					66.79	0.293023		66.99	0.426471
67.27	0.716667		67.02	0.42236					66.76	0.283721		66.44	0.480392			66.92	0.65		67.13	0.428571					67.02	0.288372		67.24	0.436275
67.66	0.675		67.21	0.416149					66.85	0.311628		66.68	0.470588			67.16	0.625		67.38	0.434783					67.17	0.297674		67.5	0.441176
67.8	0.683333		67.56	0.42236					66.99	0.297674		66.9	0.495098			67.35	0.641667		67.56	0.434783					67.46	0.293023		67.63	0.45098
67.85	0.675		67.6	0.440994					67.27	0.330233		67.13	0.470588			67.58	0.633333		67.74	0.409938					67.51	0.297674		67.84	0.446078
68.1	0.683333		67.93	0.416149					67.62	0.339535		67.35	0.480392			67.8	0.716667		68.01	0.447205					67.74	0.293023		68.06	0.455882
68.44	0.708333		68.07	0.434783					67.71	0.311628		67.61	0.455882			67.92	0.633333		68.2	0.428571					67.88	0.293023		68.25	0.421569
68.57	0.708333		68.18	0.434783					67.99	0.293023		67.81	0.495098			68.27	0.683333		68.39	0.428571					68.13	0.311628		68.39	0.465686
68.71	0.758333		68.44	0.447205					68.07	0.325581		68.05	0.485294			68.42	0.683333		68.6	0.42236					68.37	0.302326		68.68	0.431373
68.95	0.683333		68.7	0.447205					68.23	0.311628		68.17	0.480392			68.6	0.708333		68.79	0.440994					68.5	0.297674		68.89	0.441176
69.14	0.775		68.71	0.440994					68.46	0.316279		68.39	0.460784			68.71	0.733333		68.99	0.447205					68.71	0.32093		69.04	0.45098
69.32	0.758333		69.07	0.459627					68.6	0.334884		68.58	0.485294			69.01	0.741667		69.15	0.434783					68.88	0.311628		69.33	0.465686
69.52	0.75		69.23	0.484472					68.85	0.325581		68.8	0.480392			69.27	0.725		69.35	0.47205					69.03	0.316279		69.46	0.465686
69.65	0.758333		69.52	0.447205					69.02	0.306977		68.98	0.485294			69.45	0.725		69.56	0.47205					69.27	0.32093		69.66	0.446078
69.88	0.791667		69.46	0.478261					69.22	0.316279		69.17	0.504902			69.7	0.783333		69.74	0.503106					69.4	0.311628		69.89	0.45098
70.11	0.758333		69.8	0.478261					69.42	0.330233		69.45	0.470588			69.83	0.758333		69.92	0.459627					69.68	0.316279		70.1	0.485294
70.28	0.783333		70.13	0.521739					69.62	0.344186		69.6	0.485294			70	0.75		70.17	0.503106					69.85	0.32093		70.27	0.45098
70.42	0.766667		70.28	0.478261					69.88	0.344186		69.8	0.504902			70.28	0.758333		70.35	0.503106					70.08	0.344186		70.45	0.426471
70.63	0.8		70.49	0.515528					70.09	0.344186		69.91	0.470588			70.49	0.783333		70.56	0.490683					70.24	0.330233		70.8	0.460784
70.88	0.825		70.7	0.503106					70.25	0.362791		70.13	0.504902			70.63	0.808333		70.8	0.490683					70.46	0.353488		70.93	0.480392
71.07	0.866667		70.81	0.521739					70.34	0.344186		70.3	0.504902			70.77	0.833333		71.01	0.521739					70.61	0.344186		71.03	0.446078
71.23	0.816667		71.23	0.490683					70.61	0.362791		70.57	0.519608			70.99	0.8		71.19	0.490683					70.84	0.330233		71.29	0.446078
71.49	0.875		71.22	0.52795					70.79	0.348837		70.66	0.485294			71.2	0.9		71.38	0.534161					71.12	0.367442		71.5	0.490196
71.58	0.883333		71.27	0.534161					70.88	0.362791		70.92	0.470588			71.36	0.791667		71.63	0.546584					71.34	0.348837		71.71	0.465686
71.85	0.908333		71.52	0.534161					71.01	0.353488		71.12	0.495098			71.56	0.85		71.73	0.552795					71.53	0.348837		71.83	0.480392
71.96	0.883333		71.82	0.565217					71.52	0.372093		71.27	0.504902			71.77	0.858333		71.99	0.546584					71.65	0.367442		72.11	0.485294
72.18	0.941667		71.99	0.509317					71.6	0.381395		71.49	0.504902			71.99	0.908333		72.21	0.565217					71.93	0.372093		72.39	0.465686
72.39	0.875		72.2	0.559006					71.67	0.386047		71.63	0.495098			72.17	0.9		72.36	0.590062					72.13	0.367442		72.48	0.490196
72.64	0.95		72.46	0.602484					71.99	0.376744		71.9	0.519608			72.42	0.95		72.56	0.57764					72.32	0.376744		72.69	0.47549
72.85	0.925		72.62	0.602484					72.36	0.376744		72.06	0.534314			72.56	0.891667		72.72	0.596273					72.56	0.367442		72.87	0.47549
72.95	0.908333		72.78	0.614907					72.41	0.409302		72.18	0.529412			72.77	0.925		72.98	0.602484					72.72	0.35814		73.09	0.514706
73.13	1.025		73.03	0.596273					72.67	0.395349		72.49	0.529412			72.92	0.966667		73.13	0.608696					72.94	0.381395		73.36	0.490196
73.35	0.983333		73.23	0.63354					72.87	0.418605		72.74	0.514706			73.1	1.00833		73.28	0.614907					72.99	0.376744		73.43	0.485294
73.54	1.06667		73.38	0.627329					73.07	0.423256		72.85	0.558824			73.41	1		73.62	0.621118					73.23	0.386047		73.6	0.485294
73.74	1.05833		73.49	0.602484					73.25	0.418605		73.03	0.544118			73.59	0.958333		73.72	0.658385					73.52	0.367442		73.85	0.460784
73.89	1.00833		73.71	0.652174					73.38	0.4		73.2	0.558824			73.74	1.01667		73.92	0.714286					73.63	0.367442		73.96	0.490196
74.23	1.05833		73.99	0.639752					73.74	0.404651		73.44	0.544118			73.87	1.025		74.13	0.677019					73.82	0.4		74.2	0.509804
74.38	1.08333		74.28	0.639752					73.9	0.395349		73.61	0.553922			74.12	1.03333		74.35	0.701863					74.02	0.390698		74.45	0.47549
74.6	1.08333		74.41	0.677019					74.05	0.4		73.77	0.534314			74.31	1.09167		74.45	0.776398					74.26	0.4		74.65	0.5
74.77	1.08333		74.64	0.689441					74.26	0.409302		74	0.529412			74.49	1.1		74.69	0.751553					74.46	0.413953		74.77	0.509804
75.01	1.14167		74.69	0.708075					74.49	0.423256		74.31	0.529412			74.74	1.10833		74.92	0.751553					74.65	0.390698		74.98	0.480392
75.28	1.175		74.9	0.708075					74.77	0.427907		74.52	0.544118			74.87	1.125		75.02	0.770186					74.82	0.381395		75.18	0.490196
75.46	1.21667		75.03	0.776398					74.95	0.437209		74.62	0.553922			75.15	1.19167		75.27	0.776398					75.06	0.413953		75.34	0.529412
75.62	1.20833		75.35	0.745342					75.2	0.418605		74.77	0.588235			75.34	1.13333		75.55	0.732919					75.24	0.395349		75.63	0.509804
75.88	1.225		75.57	0.776398					75.4	0.460465		75.06	0.553922			75.51	1.18333		75.6	0.78882					75.45	0.432558		75.8	0.495098
76.04	1.25833		75.8	0.795031					75.49	0.451163		75.18	0.583333			75.67	1.23333		75.83	0.78882					75.54	0.404651		76.06	0.514706
76.2	1.31667		76.02	0.795031					75.77	0.455814		75.49	0.583333			75.9	1.28333		76.06	0.819876					75.81	0.418605		76.24	0.514706
76.45	1.34167		76.15	0.782609					75.95	0.469767		75.65	0.578431			76.02	1.25833		76.19	0.832298					76.01	0.437209		76.47	0.504902
76.62	1.275		76.42	0.770186					76.08	0.47907		75.92	0.578431			76.27	1.25833		76.5	0.875776					76.37	0.432558		76.56	0.514706
76.85	1.34167		76.65	0.838509					76.31	0.455814		76.12	0.602941			76.5	1.30833		76.67	0.881988					76.56	0.432558		76.79	0.539216
76.99	1.38333		76.78	0.84472					76.49	0.465116		76.24	0.568627			76.73	1.36667		76.88	0.869565					76.7	0.451163		77.01	0.583333
77.25	1.39167		76.97	0.857143					76.66	0.460465		76.49	0.588235			76.88	1.39167		77.02	0.89441					76.92	0.446512		77.27	0.568627
77.42	1.49167		77.17	0.881988					76.81	0.469767		76.65	0.612745			77.08	1.40833		77.25	0.919255					77.08	0.446512		77.46	0.52451
77.74	1.43333		77.39	0.875776					77.05	0.474419		76.88	0.593137			77.31	1.33333		77.48	0.925466					77.35	0.483721		77.62	0.553922
77.99	1.5		77.88	0.937888					77.12	0.506977		77.02	0.593137			77.46	1.35833		77.63	0.962733					77.56	0.460465		77.76	0.529412
78.15	1.55		77.99	0.919255					77.4	0.511628		77.27	0.583333			77.62	1.425		77.85	0.968944					77.78	0.483721		78.05	0.52451
78.29	1.51667		78.06	0.925466					77.73	0.502326		77.48	0.607843			77.98	1.51667		78.1	1.02484					77.91	0.437209		78.26	0.534314
									77.88	0.502326		77.64	0.602941			78.07	1.475								78.13	0.469767		78.4	0.54902

## Sheet: WL C. thermalis
S2QB-																S2QA- (DCMU)
	Replicate 1			Replicate 2			Replicate 3			Replicate 4			Replicate 5				Replicate 1			Replicate 2			Replicate 3			Replicate 4			Replicate 5
-19.87	0.055		-19.94	0.00446429		0.61	0.0769231		-19.93	0.0266667		-19.74	0.0289855			-19.88	0.03		-19.76	0.0401786		1.96	0.179487		-19.8	0.0266667		-19.79	0.0289855
-20.02	0.05		-19.97	0.00446429		0.75	0.0769231		-19.79	0.0266667		-19.87	0.0289855			-19.83	0.03		-19.8	0.0357143		2.2	0.179487		-19.83	0.04		-19.72	0.0289855
-19.94	0.045		-19.89	0.00446429		0.6	0.102564		-19.77	0.0266667		-19.81	0.0289855			-19.95	0.03		-19.77	0.0446429		2.37	0.153846		-19.83	0.04		-19.72	0.0289855
-20	0.05		-19.97	0.00892857		0.55	0.0769231		-19.89	0.0266667		-19.76	0.0289855			-19.87	0.025		-19.81	0.0446429		2.24	0.153846		-19.81	0.0266667		-19.72	0.0434783
-19.95	0.045		-19.94	0.00446429		0.9	0.0769231		-19.83	0.0266667		-19.8	0.0289855			-19.93	0.025		-19.73	0.0401786		2.38	0.153846		-19.89	0.0266667		-19.74	0.0434783
-19.95	0.05		-19.89	0.00446429		1.13	0.0769231		-19.87	0.0266667		-19.72	0.0289855			-19.91	0.03		-19.72	0.0357143		2.29	0.153846		-19.77	0.04		-19.76	0.0434783
-19.89	0.055		-19.94	0.00446429		1.04	0.102564		-19.79	0.04		-19.72	0.0434783			-19.94	0.025		-19.72	0.03125		2.24	0.153846		-19.8	0.04		-19.74	0.0434783
-19.89	0.055		-19.9	0		0.65	0.0769231		-19.69	0.0266667		-19.57	0.0289855			-19.87	0.03		-19.73	0.0446429		2.42	0.153846		-19.66	0.04		-19.62	0.0434783
-19.94	0.05		-19.83	0.00892857		1.15	0.0769231		-19.65	0.0266667		-19.41	0.0289855			-19.8	0.025		-19.65	0.0446429		2.02	0.179487		-19.62	0.0266667		-19.52	0.0289855
-19.88	0.05		-19.69	0.00892857		0.86	0.0769231		-19.57	0.0266667		-19.36	0.0289855			-19.74	0.035		-19.69	0.0357143		1.99	0.153846		-19.41	0.0266667		-19.52	0.0289855
-19.7	0.045		-19.65	0.00892857		1.06	0.0769231		-19.4	0.04		-19.15	0.0289855			-19.68	0.03		-19.55	0.0580357		1.94	0.128205		-19.39	0.04		-19.37	0.0289855
-19.65	0.045		-19.53	0.00892857		1.57	0.0769231		-19.3	0.0266667		-19.02	0.0434783			-19.58	0.03		-19.49	0.0357143		1.95	0.153846		-19.33	0.0266667		-19.24	0.0289855
-19.65	0.045		-19.26	0.00446429		1.24	0.0769231		-19.15	0.0266667		-18.88	0.0289855			-19.42	0.035		-19.41	0.0446429		2.01	0.153846		-19.2	0.04		-19.14	0.0434783
-19.56	0.05		-19.23	0.00892857		1.91	0.0769231		-18.97	0.0266667		-18.62	0.0289855			-19.44	0.035		-19.22	0.0401786		2.38	0.153846		-19.02	0.04		-18.91	0.0289855
-19.35	0.04		-18.97	0.00446429		1.82	0.0769231		-18.88	0.0266667		-18.42	0.0289855			-19.12	0.03		-19.15	0.0446429		1.95	0.128205		-18.78	0.04		-18.76	0.0434783
-19.16	0.045		-18.88	0.00446429		2.07	0.0769231		-18.64	0.0266667		-18.26	0.0434783			-18.97	0.03		-18.98	0.0357143		2.09	0.128205		-18.66	0.04		-18.61	0.0434783
-19.08	0.05		-18.7	0.00446429		2.4	0.0769231		-18.51	0.0266667		-17.88	0.0289855			-18.86	0.03		-18.74	0.0357143		1.72	0.153846		-18.38	0.0266667		-18.48	0.0289855
-18.69	0.055		-18.35	0.00446429		2.88	0.102564		-18.25	0.0266667		-17.67	0.0289855			-18.64	0.03		-18.58	0.0446429		2.31	0.153846		-18.19	0.0266667		-18.26	0.0434783
-18.55	0.05		-18.15	0.00446429		3.18	0.102564		-18.05	0.0266667		-17.4	0.0289855			-18.28	0.035		-18.34	0.0446429		2.31	0.153846		-17.96	0.04		-18	0.0434783
-18.34	0.045		-17.91	0.00892857		3.46	0.102564		-17.9	0.0266667		-17.23	0.0289855			-18.19	0.04		-18.11	0.0446429		2.02	0.128205		-17.7	0.0266667		-17.86	0.0434783
-18.05	0.055		-17.62	0.00446429		3.63	0.0769231		-17.55	0.0266667		-16.97	0.0434783			-17.82	0.035		-17.95	0.0491071		2.29	0.128205		-17.5	0.04		-17.61	0.0289855
-17.69	0.05		-17.3	0.00446429		3.8	0.0769231		-17.45	0.04		-16.77	0.0289855			-17.59	0.025		-17.53	0.0491071		2.62	0.153846		-17.26	0.04		-17.37	0.0289855
-17.4	0.05		-17.1	0.00446429		3.99	0.0769231		-17.18	0.0266667		-16.56	0.0289855			-17.3	0.035		-17.3	0.0446429		2.97	0.179487		-17.01	0.0533333		-17.19	0.057971
-17.18	0.045		-16.75	0.00892857		4.5	0.0769231		-17.01	0.0266667		-16.3	0.0289855			-17.12	0.03		-17.06	0.0446429		3.08	0.179487		-16.73	0.0533333		-17.02	0.0434783
-17.02	0.055		-16.47	0.00892857		4.73	0.102564		-16.75	0.0266667		-16.15	0.0434783			-16.73	0.04		-16.87	0.0491071		3.26	0.205128		-16.58	0.04		-16.72	0.0434783
-16.62	0.055		-16.3	0.00892857		5.1	0.0512821		-16.47	0.0266667		-15.92	0.0289855			-16.46	0.035		-16.47	0.0491071		3.49	0.128205		-16.27	0.04		-16.46	0.0289855
-16.31	0.055		-15.98	0.00446429		5.29	0.102564		-16.26	0.04		-15.62	0.0289855			-16.22	0.03		-16.15	0.0491071		4	0.153846		-16.13	0.04		-16.23	0.0434783
-15.73	0.055		-15.69	0.00892857		5.62	0.0769231		-16.08	0.0266667		-15.4	0.0289855			-15.92	0.035		-15.88	0.0491071		4.12	0.205128		-15.87	0.04		-16.05	0.0289855
-15.44	0.05		-15.44	0.00892857		5.98	0.102564		-15.73	0.04		-15.08	0.0434783			-15.5	0.04		-15.73	0.0625		4.14	0.179487		-15.59	0.04		-15.85	0.0434783
-15.4	0.055		-15.21	0.0133929		6.02	0.102564		-15.58	0.0266667		-15.08	0.0434783			-15.3	0.035		-15.4	0.0580357		4.38	0.128205		-15.42	0.04		-15.56	0.0289855
-14.98	0.055		-15	0.00892857		6.06	0.0769231		-15.44	0.0266667		-14.76	0.0289855			-15.03	0.055		-15.13	0.0669643		4.77	0.153846		-15.13	0.0533333		-15.33	0.0434783
-14.8	0.045		-14.72	0.00892857		6.23	0.102564		-15.16	0.0266667		-14.53	0.0434783			-14.73	0.045		-14.82	0.0625		5.24	0.153846		-14.96	0.0533333		-15.11	0.0289855
-14.43	0.05		-14.41	0.00446429		6.62	0.0512821		-14.92	0.04		-14.33	0.0289855			-14.61	0.045		-14.65	0.0669643		5.47	0.179487		-14.72	0.04		-14.98	0.0434783
-14.27	0.055		-14.22	0.00892857		6.81	0.0769231		-14.78	0.0266667		-14.1	0.0289855			-14.33	0.045		-14.44	0.0625		6.04	0.205128		-14.52	0.04		-14.7	0.0434783
-14	0.05		-14.05	0.00892857		7.06	0.0769231		-14.47	0.04		-14	0.0289855			-14.1	0.04		-14.14	0.0714286		6.17	0.179487		-14.32	0.04		-14.48	0.0289855
-13.96	0.05		-13.81	0.00892857		7.39	0.102564		-14.24	0.04		-13.65	0.0434783			-13.8	0.045		-13.88	0.0758929		6.66	0.153846		-14.06	0.04		-14.27	0.0434783
-13.58	0.055		-13.69	0.00892857		7.59	0.128205		-14.05	0.04		-13.49	0.0434783			-13.63	0.04		-13.71	0.0669643		6.74	0.205128		-13.93	0.04		-14.14	0.0289855
-13.45	0.045		-13.41	0.0133929		7.52	0.102564		-13.85	0.0266667		-13.33	0.0289855			-13.53	0.04		-13.49	0.0758929		6.87	0.179487		-13.63	0.0533333		-13.88	0.0434783
-13.32	0.055		-13.22	0.0133929		7.88	0.102564		-13.71	0.0266667		-13.12	0.0289855			-13.3	0.045		-13.26	0.0758929		7.25	0.179487		-13.53	0.0533333		-13.69	0.0434783
-13.12	0.055		-12.97	0.0133929		8.23	0.102564		-13.41	0.0266667		-12.9	0.0289855			-13.19	0.055		-12.98	0.0714286		7.31	0.153846		-13.26	0.04		-13.5	0.0434783
-12.97	0.055		-12.83	0.00892857		8.38	0.102564		-13.3	0.0266667		-12.75	0.0289855			-12.94	0.065		-12.83	0.0803571		7.67	0.179487		-13.11	0.0533333		-13.22	0.0434783
-12.83	0.05		-12.67	0.0133929		8.6	0.102564		-12.97	0.0266667		-12.59	0.0434783			-12.73	0.05		-12.62	0.0669643		8.08	0.205128		-12.86	0.04		-13.08	0.057971
-12.62	0.045		-12.51	0.00892857		8.29	0.102564		-12.85	0.0266667		-12.38	0.0289855			-12.55	0.045		-12.48	0.0892857		8.27	0.179487		-12.64	0.04		-12.89	0.0289855
-12.5	0.06		-12.28	0.0133929		8.69	0.102564		-12.68	0.0266667		-12.17	0.0434783			-12.36	0.045		-12.36	0.0892857		8.29	0.230769		-12.51	0.04		-12.6	0.0289855
-12.33	0.05		-12.15	0.0133929		8.65	0.102564		-12.48	0.04		-11.98	0.0289855			-12.24	0.045		-12.17	0.0892857		8.35	0.205128		-12.26	0.0533333		-12.48	0.0434783
-12.09	0.055		-11.98	0.0178571		9.24	0.128205		-12.24	0.04		-11.76	0.0289855			-12.05	0.05		-11.97	0.09375		8.74	0.230769		-12.15	0.0533333		-12.25	0.0289855
-12.11	0.05		-11.85	0.00892857		9.39	0.0769231		-12.15	0.04		-11.54	0.0289855			-11.87	0.05		-11.77	0.0803571		9.02	0.179487		-11.95	0.0533333		-12.11	0.0434783
-11.89	0.055		-11.64	0.0178571		9.45	0.102564		-11.89	0.04		-11.37	0.0289855			-11.69	0.055		-11.55	0.09375		8.8	0.230769		-11.68	0.0533333		-11.91	0.057971
-11.68	0.05		-11.48	0.0133929		9.44	0.128205		-11.65	0.04		-11.15	0.0434783			-11.44	0.055		-11.36	0.102679		8.86	0.205128		-11.58	0.0533333		-11.7	0.0434783
-11.62	0.05		-11.23	0.0133929		9.81	0.102564		-11.44	0.04		-10.95	0.0289855			-11.44	0.055		-11.19	0.09375		9.37	0.25641		-11.21	0.0533333		-11.44	0.0289855
-11.37	0.065		-11.11	0.0133929		9.7	0.0769231		-11.23	0.04		-10.73	0.0434783			-11.15	0.05		-11.07	0.107143		9.54	0.230769		-11.18	0.0533333		-11.29	0.0434783
-11.19	0.05		-10.98	0.0178571		9.92	0.128205		-11.06	0.04		-10.5	0.0289855			-11.07	0.055		-10.9	0.102679		9.3	0.205128		-10.94	0.0533333		-11.1	0.057971
-10.99	0.055		-10.79	0.0133929		10.26	0.128205		-10.94	0.0266667		-10.32	0.0289855			-10.77	0.055		-10.79	0.102679		9.56	0.205128		-10.77	0.0533333		-10.89	0.0289855
-10.81	0.055		-10.62	0.0133929		10.27	0.128205		-10.67	0.0266667		-10.2	0.0289855			-10.65	0.065		-10.59	0.111607		10.11	0.179487		-10.59	0.04		-10.71	0.0434783
-10.54	0.055		-10.36	0.0133929		10.66	0.128205		-10.46	0.04		-9.98	0.0289855			-10.41	0.06		-10.37	0.107143		10.25	0.230769		-10.4	0.0533333		-10.46	0.0289855
-10.52	0.06		-10.26	0.0133929		10.72	0.102564		-10.27	0.04		-9.74	0.0434783			-10.3	0.055		-10.14	0.111607		10.17	0.25641		-10.12	0.0533333		-10.28	0.0434783
-10.3	0.065		-10.1	0.0133929		10.97	0.102564		-10.15	0.04		-9.56	0.0289855			-10.05	0.07		-10.05	0.102679		10.67	0.25641		-9.94	0.0533333		-10.01	0.0434783
-10	0.05		-9.75	0.0133929		11.02	0.128205		-9.83	0.0266667		-9.37	0.0434783			-9.85	0.065		-9.83	0.102679		10.63	0.25641		-9.65	0.04		-9.98	0.0434783
-9.9	0.06		-9.56	0.0133929		11.38	0.102564		-9.56	0.04		-9.15	0.0289855			-9.82	0.07		-9.67	0.125		10.89	0.230769		-9.55	0.0533333		-9.71	0.0434783
-9.7	0.05		-9.37	0.0133929		11.5	0.128205		-9.34	0.04		-8.91	0.0434783			-9.48	0.065		-9.39	0.111607		10.99	0.205128		-9.27	0.0533333		-9.59	0.0434783
-9.43	0.05		-9.15	0.0223214		11.92	0.128205		-9.26	0.0266667		-8.76	0.0289855			-9.39	0.07		-9.23	0.111607		10.95	0.230769		-9.05	0.04		-9.37	0.0434783
-9.25	0.05		-8.94	0.0133929		11.94	0.102564		-9.01	0.04		-8.5	0.0289855			-9.19	0.07		-9.12	0.120536		11.27	0.230769		-8.95	0.0533333		-9.17	0.0434783
-8.99	0.05		-8.8	0.0223214		12.24	0.128205		-8.85	0.0266667		-8.33	0.0434783			-8.75	0.085		-8.89	0.120536		11.38	0.282051		-8.64	0.0666667		-8.87	0.0434783
-8.83	0.055		-8.51	0.0178571		12.54	0.128205		-8.64	0.04		-8.15	0.0434783			-8.75	0.075		-8.75	0.120536		11.96	0.282051		-8.54	0.0533333		-8.65	0.0434783
-8.57	0.05		-8.3	0.0178571		12.71	0.153846		-8.41	0.04		-7.98	0.0434783			-8.45	0.075		-8.54	0.125		11.83	0.25641		-8.31	0.0666667		-8.5	0.057971
-8.51	0.06		-8.09	0.0178571		12.74	0.128205		-8.24	0.0266667		-7.69	0.0289855			-8.31	0.07		-8.23	0.138393		12.5	0.25641		-8.17	0.0666667		-8.27	0.0434783
-8.15	0.06		-7.91	0.0267857		13.06	0.153846		-8.04	0.04		-7.45	0.0434783			-8.1	0.075		-8.08	0.125		12.28	0.307692		-7.86	0.0666667		-8	0.0434783
-7.87	0.065		-7.66	0.0267857		13.44	0.153846		-7.83	0.04		-7.32	0.0289855			-7.78	0.08		-7.83	0.133929		12.35	0.307692		-7.58	0.0533333		-7.76	0.0434783
-7.72	0.06		-7.5	0.0223214		13.56	0.128205		-7.76	0.0533333		-7.12	0.0289855			-7.66	0.07		-7.7	0.142857		12.65	0.25641		-7.46	0.0533333		-7.65	0.057971
-7.48	0.05		-7.36	0.0223214		13.56	0.153846		-7.48	0.0533333		-6.96	0.0434783			-7.38	0.075		-7.4	0.138393		12.74	0.25641		-7.33	0.0533333		-7.38	0.0434783
-7.22	0.05		-7.12	0.0223214		13.76	0.128205		-7.26	0.0533333		-6.72	0.0434783			-7.18	0.075		-7.22	0.142857		12.98	0.282051		-7.12	0.08		-7.26	0.0289855
-7.15	0.06		-6.94	0.0223214		14.13	0.153846		-7.05	0.04		-6.48	0.0434783			-7.02	0.075		-7.04	0.142857		13.47	0.25641		-6.94	0.0533333		-7.08	0.0434783
-6.82	0.045		-6.72	0.0223214		14.41	0.153846		-6.9	0.04		-6.33	0.0289855			-6.82	0.08		-6.81	0.151786		13.7	0.282051		-6.73	0.0533333		-6.85	0.0434783
-6.56	0.05		-6.51	0.0178571		14.6	0.128205		-6.66	0.04		-6.09	0.0434783			-6.5	0.08		-6.59	0.142857		14.07	0.282051		-6.58	0.0533333		-6.59	0.0289855
-6.5	0.065		-6.4	0.0223214		14.8	0.153846		-6.6	0.04		-5.9	0.0289855			-6.44	0.08		-6.44	0.165179		13.95	0.358974		-6.32	0.0666667		-6.44	0.057971
-6.33	0.07		-6.08	0.0267857		14.86	0.128205		-6.32	0.04		-5.57	0.0289855			-6.13	0.08		-6.1	0.147321		14.58	0.25641		-6.14	0.0533333		-6.31	0.057971
-6.06	0.05		-5.86	0.0267857		15.12	0.153846		-6.13	0.04		-5.54	0.0289855			-5.94	0.08		-5.89	0.138393		14.5	0.282051		-5.93	0.08		-6.05	0.057971
-5.76	0.06		-5.69	0.0223214		15.42	0.128205		-5.94	0.04		-5.39	0.0434783			-5.8	0.075		-5.81	0.142857		15.07	0.333333		-5.77	0.0533333		-5.83	0.057971
-5.63	0.065		-5.51	0.0178571		15.62	0.128205		-5.76	0.04		-5.13	0.0434783			-5.48	0.095		-5.58	0.174107		14.81	0.358974		-5.46	0.0666667		-5.59	0.0434783
-5.25	0.05		-5.25	0.0223214		15.81	0.153846		-5.44	0.0266667		-4.85	0.0289855			-5.31	0.09		-5.35	0.165179		15.27	0.307692		-5.36	0.0666667		-5.41	0.0434783
-5.32	0.055		-5	0.0223214		15.96	0.153846		-5.39	0.04		-4.7	0.0434783			-5.01	0.085		-5.15	0.165179		15.51	0.282051		-5.09	0.0533333		-5.29	0.0434783
-4.94	0.055		-4.77	0.0267857		16.01	0.153846		-5.12	0.04		-4.59	0.0289855			-5	0.095		-4.89	0.165179		15.49	0.333333		-4.89	0.0533333		-5.12	0.057971
-4.7	0.06		-4.67	0.0223214		16.23	0.153846		-4.85	0.04		-4.3	0.0434783			-4.69	0.085		-4.75	0.151786		15.81	0.307692		-4.61	0.0666667		-4.89	0.057971
-4.58	0.06		-4.46	0.0267857		16.56	0.179487		-4.69	0.04		-4.05	0.0289855			-4.52	0.105		-4.55	0.160714		15.77	0.282051		-4.39	0.0666667		-4.63	0.0434783
-4.3	0.05		-4.2	0.0223214		16.96	0.128205		-4.47	0.04		-3.98	0.0289855			-4.3	0.085		-4.23	0.165179		16.1	0.333333		-4.15	0.0533333		-4.5	0.057971
-4.08	0.055		-4.04	0.0267857		16.99	0.153846		-4.3	0.04		-3.63	0.0289855			-4.23	0.09		-4.19	0.160714		16.33	0.358974		-4.04	0.0666667		-4.23	0.057971
-3.94	0.065		-3.85	0.0267857		17.18	0.153846		-4.08	0.04		-3.41	0.0289855			-3.8	0.085		-3.94	0.183036		16.29	0.307692		-3.81	0.0533333		-4	0.057971
-3.78	0.06		-3.65	0.0223214		17.43	0.153846		-3.86	0.0533333		-3.2	0.0289855			-3.77	0.1		-3.77	0.165179		16.56	0.282051		-3.65	0.0666667		-3.83	0.0434783
-3.51	0.05		-3.41	0.0223214		17.54	0.205128		-3.65	0.0533333		-3.17	0.0289855			-3.58	0.095		-3.51	0.169643		16.92	0.333333		-3.35	0.0666667		-3.69	0.0434783
-3.37	0.065		-3.37	0.0223214		17.85	0.153846		-3.48	0.04		-2.9	0.0434783			-3.33	0.105		-3.3	0.178571		17.17	0.282051		-3.19	0.0666667		-3.37	0.057971
-3.06	0.065		-3.07	0.0267857		18.28	0.153846		-3.25	0.04		-2.68	0.0434783			-3.24	0.105		-3.14	0.178571		17.28	0.307692		-3.02	0.0666667		-3.26	0.0434783
-2.94	0.06		-2.9	0.0223214		18.31	0.179487		-2.98	0.04		-2.47	0.0289855			-2.83	0.09		-2.92	0.183036		17.55	0.358974		-2.78	0.0533333		-2.98	0.057971
-2.76	0.06		-2.65	0.0267857		18.42	0.153846		-2.86	0.0666667		-2.25	0.0434783			-2.82	0.11		-2.77	0.196429		17.74	0.384615		-2.68	0.0666667		-2.86	0.057971
-2.5	0.06		-2.5	0.0223214		18.38	0.153846		-2.6	0.0533333		-2.11	0.0434783			-2.48	0.08		-2.62	0.183036		17.79	0.384615		-2.44	0.0666667		-2.6	0.0434783
-2.49	0.06		-2.29	0.03125		18.85	0.179487		-2.41	0.04		-1.87	0.0434783			-2.37	0.12		-2.37	0.178571		18.1	0.333333		-2.23	0.0666667		-2.47	0.057971
-2.17	0.065		-2.08	0.0267857		19.24	0.179487		-2.19	0.0666667		-1.7	0.0434783			-2.15	0.095		-2.1	0.1875		18.09	0.358974		-2.08	0.0933333		-2.29	0.057971
-2.03	0.07		-1.88	0.0223214		19.3	0.179487		-2.08	0.04		-1.48	0.0289855			-1.96	0.1		-1.94	0.1875		18.38	0.358974		-1.82	0.08		-2.07	0.057971
-1.88	0.065		-1.61	0.0267857		19.49	0.179487		-1.9	0.0533333		-1.27	0.0434783			-1.76	0.105		-1.78	0.200893		18.63	0.435897		-1.61	0.08		-1.87	0.057971
-1.54	0.065		-1.44	0.0357143		19.42	0.205128		-1.61	0.0533333		-1.05	0.0434783			-1.55	0.12		-1.57	0.1875		18.7	0.410256		-1.53	0.08		-1.69	0.057971
-1.37	0.065		-1.22	0.03125		19.68	0.153846		-1.48	0.04		-0.8	0.057971			-1.37	0.105		-1.22	0.1875		19.13	0.358974		-1.16	0.08		-1.43	0.057971
-1.2	0.07		-0.98	0.0267857		20.14	0.153846		-1.27	0.04		-0.69	0.0289855			-1.18	0.105		-1.19	0.21875		19.25	0.461538		-1.06	0.106667		-1.26	0.0724638
-1	0.065		-0.83	0.0357143		19.97	0.179487		-1.03	0.0533333		-0.37	0.0289855			-0.84	0.12		-0.94	0.191964		19.64	0.435897		-0.88	0.0933333		-1.06	0.057971
-0.83	0.07		-0.65	0.0357143		20.35	0.205128		-0.87	0.04		-0.25	0.0289855			-0.78	0.115		-0.66	0.205357		19.49	0.410256		-0.65	0.08		-0.87	0.0724638
-0.69	0.07		-0.45	0.0401786		20.23	0.179487		-0.62	0.0666667		-0.01	0.0434783			-0.51	0.11		-0.55	0.205357		19.92	0.435897		-0.42	0.08		-0.62	0.0724638
-0.52	0.075		-0.21	0.0267857		20.74	0.179487		-0.4	0.0533333		0.12	0.0434783			-0.38	0.11		-0.36	0.196429		20.21	0.435897		-0.22	0.0933333		-0.44	0.0724638
-0.19	0.06		-0.03	0.0401786		20.97	0.205128		-0.3	0.0533333		0.29	0.0289855			-0.03	0.12		-0.12	0.21875		20.23	0.435897		-0.17	0.0933333		-0.22	0.0724638
-0.02	0.065		0.11	0.0357143		21.24	0.179487		-0.11	0.0533333		0.49	0.0434783			0.04	0.13		0.07	0.21875		20.38	0.435897		0.18	0.08		0.04	0.057971
0.08	0.075		0.29	0.03125		21.32	0.153846		0.12	0.0533333		0.76	0.0289855			0.31	0.12		0.28	0.214286		20.67	0.410256		0.37	0.0933333		0.17	0.057971
0.23	0.065		0.53	0.03125		21.41	0.205128		0.25	0.0533333		0.88	0.0434783			0.56	0.12		0.49	0.21875		20.85	0.384615		0.59	0.0933333		0.42	0.0724638
0.43	0.07		0.7	0.0401786		21.56	0.230769		0.49	0.0533333		1.02	0.0434783			0.69	0.13		0.7	0.214286		21.06	0.384615		0.77	0.0933333		0.52	0.0724638
0.65	0.07		0.95	0.0401786		22.05	0.25641		0.77	0.0533333		1.28	0.0289855			0.86	0.135		0.88	0.227679		21.19	0.435897		0.92	0.106667		0.78	0.0724638
0.86	0.07		1.15	0.03125		21.92	0.205128		0.95	0.0666667		1.52	0.0434783			1.1	0.12		1.17	0.209821		21.67	0.384615		1.15	0.0933333		0.99	0.0724638
1.05	0.06		1.45	0.0357143		22.55	0.230769		1.13	0.0666667		1.78	0.0434783			1.41	0.145		1.31	0.227679		21.48	0.410256		1.37	0.12		1.13	0.0724638
1.28	0.06		1.56	0.03125		22.31	0.205128		1.45	0.0533333		1.97	0.0289855			1.47	0.14		1.53	0.223214		21.67	0.461538		1.67	0.106667		1.37	0.057971
1.57	0.065		1.8	0.0357143		22.55	0.205128		1.68	0.0533333		2.21	0.0434783			1.77	0.14		1.78	0.223214		21.69	0.461538		1.81	0.106667		1.61	0.0724638
1.88	0.075		2	0.0401786		22.78	0.230769		1.85	0.0533333		2.37	0.0289855			2.01	0.155		1.94	0.232143		22.26	0.461538		2.11	0.106667		1.81	0.0724638
2.04	0.07		2.24	0.0401786		23.22	0.25641		2.04	0.0666667		2.56	0.0434783			2.19	0.135		2.33	0.227679		22.55	0.487179		2.27	0.12		2.05	0.0869565
2.17	0.06		2.45	0.0357143		23.24	0.205128		2.21	0.0666667		2.78	0.0434783			2.39	0.13		2.44	0.245536		22.65	0.487179		2.42	0.133333		2.24	0.0724638
2.3	0.07		2.7	0.0446429		23.45	0.230769		2.4	0.08		2.93	0.0289855			2.69	0.135		2.6	0.232143		22.59	0.384615		2.67	0.106667		2.45	0.0724638
2.7	0.065		2.91	0.0401786		23.63	0.230769		2.67	0.08		3.12	0.0434783			2.83	0.155		2.75	0.223214		22.98	0.461538		2.88	0.106667		2.75	0.0869565
2.82	0.07		3.13	0.0401786		24.1	0.230769		2.82	0.0666667		3.41	0.0289855			3.01	0.155		2.93	0.254464		23.17	0.487179		3.02	0.133333		2.83	0.0724638
3.1	0.08		3.26	0.0401786		24.31	0.25641		3.05	0.08		3.6	0.0434783			3.14	0.165		3.24	0.25		23.54	0.487179		3.26	0.106667		2.98	0.0869565
3.37	0.07		3.52	0.0446429		24.21	0.230769		3.27	0.0533333		3.8	0.0434783			3.49	0.135		3.35	0.25		23.83	0.512821		3.47	0.12		3.2	0.0724638
3.45	0.09		3.74	0.0446429		24.41	0.205128		3.51	0.0666667		3.99	0.0434783			3.47	0.135		3.7	0.245536		23.86	0.435897		3.66	0.133333		3.46	0.0724638
3.78	0.08		3.96	0.0401786		24.87	0.230769		3.71	0.0666667		4.17	0.0434783			3.88	0.16		3.85	0.25		24.17	0.435897		3.94	0.146667		3.67	0.0869565
4	0.08		4.19	0.0446429		25.02	0.230769		3.84	0.0666667		4.44	0.057971			4.07	0.14		4.01	0.272321		24.15	0.435897		4.14	0.106667		3.91	0.101449
4.2	0.075		4.33	0.0535714		25.27	0.25641		3.95	0.0666667		4.65	0.0434783			4.14	0.145		4.29	0.254464		24.61	0.410256		4.25	0.106667		4.05	0.0869565
4.44	0.07		4.52	0.0491071		25.22	0.230769		4.29	0.08		4.85	0.0434783			4.43	0.165		4.43	0.258929		24.5	0.487179		4.5	0.146667		4.24	0.0869565
4.62	0.075		4.7	0.0446429		25.6	0.333333		4.5	0.0533333		4.99	0.0434783			4.58	0.16		4.64	0.263393		24.91	0.487179		4.7	0.146667		4.48	0.0724638
4.79	0.09		4.85	0.0580357		25.88	0.25641		4.69	0.0666667		5.25	0.057971			4.81	0.17		4.88	0.263393		24.97	0.564103		4.88	0.16		4.68	0.0869565
5.08	0.075		5.17	0.0446429		25.85	0.230769		4.87	0.0533333		5.44	0.0289855			5.04	0.165		5.03	0.25		25.46	0.487179		5.16	0.16		4.94	0.0869565
5.23	0.085		5.23	0.0446429		26.19	0.282051		5.04	0.0533333		5.64	0.0434783			5.19	0.16		5.24	0.25		25.38	0.512821		5.33	0.16		5.06	0.115942
5.35	0.075		5.44	0.0446429		26.41	0.333333		5.27	0.0533333		5.85	0.0434783			5.35	0.165		5.47	0.263393		25.89	0.512821		5.43	0.16		5.29	0.0869565
5.6	0.07		5.75	0.0446429		26.64	0.25641		5.44	0.0666667		6.03	0.0434783			5.77	0.16		5.62	0.263393		25.74	0.487179		5.7	0.16		5.52	0.101449
5.79	0.07		5.87	0.0491071		26.99	0.25641		5.6	0.08		6.27	0.057971			5.77	0.175		5.85	0.263393		26.1	0.461538		5.88	0.146667		5.72	0.101449
6.1	0.085		6.12	0.0580357		26.96	0.25641		5.89	0.0666667		6.49	0.057971			6.1	0.155		6.03	0.272321		26.33	0.564103		6	0.186667		5.91	0.0869565
6.25	0.08		6.29	0.0446429		27.09	0.282051		6.04	0.0933333		6.72	0.0434783			6.1	0.185		6.18	0.272321		26.39	0.589744		6.22	0.16		6.1	0.0869565
6.48	0.09		6.42	0.0535714		27.61	0.307692		6.16	0.0666667		6.81	0.057971			6.42	0.155		6.48	0.263393		26.35	0.512821		6.38	0.16		6.19	0.115942
6.6	0.085		6.69	0.0535714		27.97	0.307692		6.44	0.0666667		7.06	0.0434783			6.67	0.175		6.5	0.263393		27	0.538462		6.6	0.133333		6.44	0.101449
6.79	0.075		6.89	0.0491071		27.72	0.307692		6.68	0.0933333		7.25	0.057971			6.81	0.17		6.74	0.272321		26.86	0.461538		6.83	0.146667		6.63	0.101449
6.99	0.08		7.02	0.0491071		28.06	0.333333		6.81	0.08		7.5	0.057971			7.06	0.19		7.06	0.290179		27.38	0.461538		7.08	0.186667		6.98	0.101449
7.24	0.09		7.2	0.0446429		28.2	0.282051		7.06	0.0666667		7.62	0.057971			7.2	0.17		7.17	0.258929		27.48	0.512821		7.2	0.173333		7.03	0.115942
7.31	0.085		7.49	0.0625		28.15	0.333333		7.2	0.0666667		7.83	0.0434783			7.45	0.18		7.44	0.258929		27.62	0.589744		7.4	0.16		7.31	0.115942
7.54	0.085		7.75	0.0580357		28.73	0.282051		7.4	0.08		8.02	0.0289855			7.44	0.2		7.56	0.272321		27.97	0.512821		7.69	0.16		7.42	0.130435
7.67	0.08		7.92	0.0625		28.61	0.307692		7.62	0.08		8.15	0.057971			7.84	0.19		7.77	0.245536		27.9	0.487179		7.92	0.146667		7.67	0.101449
7.92	0.075		8.05	0.0446429		28.8	0.282051		7.75	0.08		8.52	0.0434783			7.94	0.205		8.04	0.267857		28.09	0.538462		8.09	0.2		7.88	0.130435
8.08	0.095		8.2	0.0535714		29.27	0.307692		7.99	0.08		8.53	0.057971			8.17	0.195		8.17	0.285714		28.36	0.512821		8.24	0.2		8.08	0.115942
8.31	0.075		8.45	0.0580357		29	0.333333		8.17	0.0933333		8.76	0.0434783			8.42	0.235		8.4	0.285714		28.65	0.461538		8.42	0.186667		8.3	0.130435
8.49	0.09		8.65	0.0535714		29.7	0.307692		8.36	0.08		8.99	0.0434783			8.46	0.22		8.57	0.3125		28.74	0.487179		8.66	0.173333		8.49	0.115942
8.63	0.085		8.85	0.0491071		29.72	0.358974		8.65	0.08		9.26	0.057971			8.72	0.225		8.77	0.316964		29.27	0.487179		8.8	0.186667		8.59	0.115942
8.84	0.08		9.12	0.0535714		30.02	0.358974		8.82	0.0933333		9.39	0.0434783			8.92	0.22		9.03	0.299107		29.23	0.512821		9.03	0.186667		8.87	0.130435
9.11	0.09		9.28	0.0580357		30.21	0.384615		9.05	0.08		9.62	0.057971			9.3	0.245		9.24	0.334821		29.39	0.512821		9.26	0.186667		8.97	0.144928
9.31	0.08		9.45	0.0580357		30.32	0.384615		9.24	0.106667		9.81	0.057971			9.32	0.24		9.49	0.321429		29.52	0.589744		9.49	0.173333		9.24	0.15942
9.43	0.085		9.64	0.0580357		30.56	0.358974		9.45	0.08		9.95	0.057971			9.68	0.26		9.6	0.348214		29.7	0.487179		9.64	0.173333		9.44	0.130435
9.64	0.095		9.96	0.0491071		30.62	0.333333		9.66	0.08		10.17	0.0434783			9.77	0.25		9.88	0.339286		29.91	0.461538		9.99	0.186667		9.75	0.130435
10	0.085		10.15	0.0669643		30.89	0.410256		9.83	0.0933333		10.4	0.0724638			10.09	0.275		10.07	0.339286		30.25	0.487179		10.15	0.213333		9.89	0.115942
10.17	0.09		10.34	0.0491071		31.1	0.384615		10.04	0.0933333		10.62	0.057971			10.17	0.265		10.26	0.357143		30.5	0.538462		10.26	0.226667		10.05	0.144928
10.35	0.09		10.42	0.0580357		31.27	0.384615		10.27	0.0933333		10.81	0.057971			10.53	0.29		10.41	0.401786		30.66	0.512821		10.52	0.2		10.34	0.15942
10.5	0.07		10.74	0.0580357		31.3	0.435897		10.47	0.106667		10.99	0.0434783			10.57	0.305		10.66	0.40625		30.68	0.538462		10.74	0.213333		10.5	0.130435
10.68	0.095		10.92	0.0625		31.56	0.410256		10.6	0.08		11.15	0.057971			10.78	0.295		10.85	0.383929		30.85	0.512821		10.88	0.2		10.7	0.130435
10.98	0.1		11.09	0.0580357		31.77	0.384615		10.87	0.0933333		11.34	0.057971			11.06	0.315		11.04	0.40625		31.17	0.538462		11.14	0.2		10.88	0.144928
11.2	0.09		11.31	0.0625		31.97	0.384615		10.99	0.106667		11.62	0.057971			11.09	0.305		11.3	0.424107		31.38	0.487179		11.24	0.213333		11.02	0.144928
11.41	0.095		11.51	0.0535714		32.14	0.410256		11.2	0.106667		11.82	0.0434783			11.35	0.325		11.51	0.428571		31.44	0.564103		11.42	0.213333		11.33	0.15942
11.49	0.095		11.72	0.0580357		32.53	0.410256		11.4	0.08		12.1	0.057971			11.46	0.325		11.67	0.455357		31.85	0.512821		11.62	0.226667		11.5	0.144928
11.63	0.105		11.93	0.0669643		32.66	0.435897		11.7	0.106667		12.17	0.057971			11.74	0.31		11.85	0.450893		31.7	0.512821		11.88	0.2		11.64	0.173913
11.85	0.105		12.2	0.0714286		32.76	0.384615		11.83	0.0933333		12.4	0.057971			11.95	0.32		12.07	0.446429		32.05	0.512821		11.99	0.24		11.89	0.144928
12.2	0.095		12.31	0.0669643		32.85	0.384615		12.06	0.08		12.55	0.057971			12.11	0.35		12.27	0.495536		32.36	0.461538		12.23	0.253333		11.97	0.173913
12.24	0.1		12.54	0.0714286		33.36	0.461538		12.25	0.0933333		12.74	0.057971			12.43	0.345		12.43	0.464286		32.44	0.487179		12.49	0.24		12.14	0.173913
12.5	0.105		12.74	0.0714286		33.5	0.410256		12.48	0.0933333		13.06	0.0724638			12.57	0.355		12.59	0.508929		32.81	0.512821		12.67	0.24		12.39	0.144928
12.77	0.1		12.89	0.0848214		33.64	0.435897		12.72	0.106667		13.25	0.057971			12.88	0.355		12.85	0.504464		32.87	0.487179		12.85	0.24		12.55	0.15942
12.95	0.095		13.08	0.0848214		33.73	0.461538		12.84	0.0933333		13.42	0.057971			13.06	0.35		12.99	0.504464		33.1	0.538462		13.03	0.266667		12.82	0.173913
13.25	0.115		13.4	0.0803571		34.03	0.435897		13.17	0.0933333		13.68	0.057971			13.21	0.375		13.27	0.540179		33.42	0.564103		13.29	0.253333		13.06	0.144928
13.24	0.1		13.49	0.0848214		34.13	0.461538		13.24	0.106667		13.76	0.0434783			13.56	0.36		13.47	0.517857		33.63	0.435897		13.47	0.226667		13.2	0.188406
13.49	0.12		13.73	0.0714286		34.6	0.461538		13.46	0.106667		13.96	0.057971			13.47	0.41		13.57	0.53125		33.71	0.538462		13.66	0.266667		13.4	0.173913
13.7	0.12		13.95	0.0848214		34.56	0.461538		13.67	0.0933333		14.16	0.0724638			13.74	0.375		13.87	0.553571		33.78	0.512821		13.96	0.28		13.67	0.15942
13.96	0.11		14.15	0.09375		34.9	0.487179		13.83	0.12		14.35	0.057971			13.92	0.41		14.05	0.53125		34.15	0.487179		14.06	0.266667		13.85	0.173913
14.2	0.12		14.45	0.0848214		35.05	0.461538		14.07	0.12		14.61	0.057971			14.13	0.395		14.33	0.549107		34.4	0.512821		14.32	0.28		14.2	0.15942
14.31	0.125		14.54	0.0892857		35.42	0.512821		14.41	0.106667		14.81	0.057971			14.37	0.385		14.53	0.549107		34.56	0.461538		14.41	0.266667		14.36	0.202899
14.61	0.115		14.73	0.0892857		35.56	0.461538		14.48	0.0933333		15.06	0.0724638			14.65	0.385		14.6	0.558036		34.77	0.435897		14.67	0.253333		14.43	0.188406
14.82	0.11		14.99	0.102679		35.75	0.487179		14.76	0.12		15.31	0.057971			14.9	0.415		14.88	0.549107		34.99	0.487179		14.85	0.293333		14.7	0.202899
14.99	0.135		15.17	0.107143		36.01	0.512821		14.88	0.0933333		15.4	0.057971			15.04	0.43		15.07	0.589286		34.99	0.589744		15.1	0.28		14.9	0.188406
15.18	0.125		15.31	0.0982143		36.2	0.487179		14.92	0.106667		15.64	0.057971			15.08	0.435		15.32	0.59375		35.38	0.487179		15.34	0.28		15.04	0.173913
15.38	0.135		15.51	0.0982143		36.49	0.538462		15.32	0.12		15.85	0.0724638			15.46	0.455		15.52	0.598214		35.63	0.512821		15.38	0.266667		15.24	0.173913
15.51	0.12		15.77	0.107143		36.57	0.487179		15.44	0.106667		16.01	0.0724638			15.64	0.44		15.7	0.598214		35.9	0.435897		15.83	0.24		15.44	0.217391
15.81	0.13		15.96	0.102679		36.69	0.512821		15.62	0.106667		16.23	0.0724638			15.75	0.435		15.92	0.625		35.75	0.487179		15.9	0.28		15.63	0.15942
15.9	0.14		16.11	0.0982143		36.86	0.487179		15.81	0.12		16.46	0.057971			16.11	0.445		16.07	0.620536		36.47	0.435897		16.11	0.28		15.88	0.217391
16.16	0.125		16.42	0.0982143		37.32	0.512821		16	0.106667		16.67	0.057971			16.31	0.43		16.33	0.602679		36.29	0.461538		16.27	0.32		16.13	0.202899
16.37	0.13		16.59	0.133929		37.52	0.538462		16.2	0.0933333		16.85	0.0724638			16.45	0.45		16.56	0.633929		36.64	0.487179		16.44	0.293333		16.27	0.202899
16.56	0.135		16.78	0.116071		37.85	0.461538		16.39	0.12		17.06	0.0724638			16.62	0.44		16.63	0.660714		36.67	0.461538		16.67	0.306667		16.44	0.202899
16.95	0.14		16.92	0.120536		37.92	0.487179		16.61	0.106667		17.26	0.0724638			16.94	0.44		16.94	0.647321		37.06	0.435897		16.92	0.306667		16.66	0.202899
17.18	0.13		17.15	0.107143		37.99	0.538462		16.78	0.133333		17.43	0.0869565			17.09	0.465		17.1	0.65625		36.99	0.487179		17.05	0.306667		16.85	0.217391
17.24	0.13		17.31	0.125		38.31	0.461538		17.04	0.146667		17.59	0.0724638			17.37	0.465		17.16	0.642857		37.32	0.487179		17.28	0.293333		17.05	0.202899
17.43	0.13		17.52	0.120536		38.24	0.538462		17.2	0.146667		17.85	0.057971			17.48	0.465		17.5	0.651786		37.57	0.435897		17.46	0.306667		17.24	0.202899
17.68	0.135		17.74	0.133929		38.49	0.564103		17.43	0.12		17.98	0.057971			17.68	0.47		17.62	0.683036		37.85	0.487179		17.66	0.32		17.52	0.202899
17.92	0.13		17.92	0.125		38.56	0.538462		17.59	0.12		18.26	0.0869565			17.9	0.485		17.92	0.65625		37.75	0.461538		17.87	0.293333		17.62	0.246377
18.09	0.115		18.17	0.125		39.11	0.512821		17.87	0.133333		18.39	0.0724638			18.13	0.5		18.06	0.665179		38.22	0.461538		18.04	0.32		17.85	0.188406
18.29	0.14		18.35	0.120536		39.13	0.564103		18.05	0.133333		18.64	0.057971			18.27	0.495		18.26	0.65625		38.51	0.384615		18.29	0.333333		18.02	0.231884
18.46	0.14		18.57	0.129464		39.42	0.538462		18.17	0.133333		18.85	0.0724638			18.38	0.49		18.38	0.696429		38.45	0.435897		18.42	0.32		18.34	0.231884
18.64	0.14		18.83	0.129464		39.56	0.589744		18.48	0.12		19.02	0.0724638			18.7	0.505		18.6	0.696429		38.63	0.435897		18.66	0.333333		18.49	0.217391
18.88	0.145		18.96	0.138393		40.01	0.564103		18.67	0.133333		19.23	0.0724638			18.81	0.495		18.9	0.732143		38.95	0.384615		18.83	0.293333		18.67	0.202899
19	0.145		19.2	0.133929		39.84	0.589744		18.78	0.106667		19.4	0.0869565			19.17	0.495		19.05	0.714286		39.09	0.410256		19.07	0.36		18.79	0.217391
19.18	0.15		19.42	0.142857		39.92	0.615385		19	0.133333		19.66	0.0869565			19.24	0.525		19.2	0.691964		39.22	0.384615		19.27	0.333333		19.13	0.231884
19.33	0.15		19.6	0.151786		40.22	0.589744		19.27	0.146667		19.81	0.0869565			19.42	0.53		19.45	0.727679		39.34	0.384615		19.46	0.333333		19.23	0.217391
19.49	0.145		19.84	0.138393		40.31	0.641026		19.42	0.12		20.02	0.0869565			19.6	0.485		19.68	0.6875		39.68	0.410256		19.7	0.333333		19.49	0.188406
19.85	0.16		19.97	0.138393		40.52	0.564103		19.64	0.133333		20.3	0.0869565			19.77	0.51		19.9	0.727679		39.89	0.410256		19.91	0.36		19.66	0.231884
20.01	0.165		20.19	0.151786		40.82	0.641026		19.81	0.146667		20.49	0.0869565			20.01	0.52		20.02	0.71875		39.95	0.384615		20.15	0.306667		19.92	0.217391
20.2	0.16		20.33	0.133929		40.9	0.615385		19.99	0.12		20.66	0.0869565			20.32	0.52		20.21	0.754464		40.27	0.410256		20.26	0.36		20.02	0.231884
20.35	0.155		20.56	0.147321		41.09	0.589744		20.17	0.16		20.85	0.0869565			20.32	0.535		20.44	0.745536		40.43	0.461538		20.49	0.36		20.24	0.246377
20.6	0.15		20.74	0.138393		41.6	0.641026		20.38	0.133333		20.97	0.101449			20.68	0.56		20.61	0.732143		40.56	0.410256		20.74	0.346667		20.45	0.217391
20.77	0.145		20.99	0.15625		41.45	0.589744		20.62	0.12		21.3	0.0869565			20.81	0.56		20.85	0.754464		40.94	0.358974		20.96	0.36		20.74	0.246377
20.9	0.165		21.18	0.165179		41.61	0.641026		20.83	0.133333		21.44	0.0869565			20.92	0.56		21.12	0.75		41.03	0.358974		21.06	0.346667		20.82	0.231884
21.11	0.18		21.38	0.147321		41.85	0.666667		21.1	0.146667		21.64	0.0724638			21.19	0.53		21.24	0.78125		41.38	0.410256		21.23	0.346667		21.05	0.26087
21.27	0.16		21.53	0.15625		42.16	0.692308		21.21	0.146667		21.81	0.101449			21.44	0.545		21.44	0.763393		41.49	0.384615		21.56	0.333333		21.25	0.275362
21.51	0.15		21.71	0.160714		42.17	0.641026		21.46	0.133333		22.04	0.0869565			21.6	0.55		21.59	0.741071		41.78	0.384615		21.67	0.36		21.48	0.26087
21.74	0.18		21.99	0.165179		42.56	0.615385		21.56	0.16		22.2	0.115942			21.82	0.555		21.85	0.758929		41.75	0.410256		21.91	0.36		21.64	0.26087
21.92	0.175		22.17	0.169643		42.57	0.589744		21.81	0.146667		22.34	0.101449			22	0.53		22.06	0.741071		42.16	0.410256		22.02	0.36		21.85	0.231884
22.02	0.18		22.31	0.174107		42.79	0.666667		22.05	0.146667		22.58	0.115942			22.18	0.56		22.24	0.803571		42.18	0.333333		22.29	0.36		22.09	0.217391
22.23	0.155		22.56	0.15625		43.05	0.641026		22.29	0.133333		22.75	0.0869565			22.24	0.58		22.46	0.776786		42.45	0.333333		22.56	0.413333		22.26	0.275362
22.49	0.165		22.77	0.169643		43.47	0.717949		22.42	0.146667		22.98	0.101449			22.62	0.555		22.63	0.754464		42.74	0.384615		22.67	0.373333		22.42	0.26087
22.64	0.18		22.98	0.169643		43.8	0.717949		22.67	0.146667		23.17	0.0869565			22.81	0.56		22.84	0.767857		42.98	0.358974		22.88	0.333333		22.67	0.217391
22.89	0.17		23.17	0.174107		43.73	0.692308		22.88	0.173333		23.43	0.115942			22.94	0.585		23.07	0.790179		42.88	0.384615		23.13	0.373333		22.89	0.275362
23.09	0.18		23.29	0.169643		43.92	0.641026		23.1	0.186667		23.61	0.115942			23.25	0.59		23.22	0.803571		43.21	0.384615		23.33	0.346667		23.05	0.231884
23.24	0.185		23.55	0.165179		44.13	0.666667		23.22	0.16		23.83	0.101449			23.49	0.6		23.42	0.75		43.61	0.358974		23.55	0.373333		23.29	0.26087
23.47	0.175		23.74	0.174107		44.43	0.74359		23.48	0.16		23.99	0.101449			23.54	0.59		23.6	0.772321		43.66	0.358974		23.76	0.373333		23.45	0.275362
23.5	0.175		23.94	0.196429		44.72	0.666667		23.78	0.186667		24.31	0.101449			23.9	0.6		23.81	0.776786		43.75	0.384615		23.95	0.36		23.7	0.246377
23.83	0.17		24.2	0.200893		44.85	0.74359		23.99	0.186667		24.45	0.115942			24.04	0.565		23.99	0.776786		44.13	0.358974		24.04	0.36		23.83	0.246377
23.99	0.18		24.37	0.1875		44.96	0.717949		24.19	0.173333		24.61	0.115942			24.13	0.585		24.21	0.78125		44.38	0.333333		24.26	0.346667		24.03	0.26087
24.25	0.195		24.55	0.183036		45.19	0.74359		24.33	0.16		24.88	0.115942			24.52	0.595		24.44	0.8125		44.5	0.333333		24.48	0.373333		24.31	0.246377
24.43	0.17		24.8	0.178571		45.39	0.666667		24.57	0.173333		25.09	0.115942			24.63	0.59		24.62	0.794643		44.84	0.333333		24.71	0.4		24.55	0.26087
24.66	0.19		24.98	0.191964		45.67	0.692308		24.71	0.173333		25.25	0.130435			24.75	0.565		24.81	0.772321		44.97	0.358974		24.86	0.386667		24.67	0.26087
24.84	0.205		25.13	0.196429		45.64	0.692308		24.93	0.16		25.46	0.115942			25.09	0.575		24.95	0.794643		45.19	0.358974		25.13	0.36		24.89	0.26087
25.02	0.18		25.38	0.205357		45.94	0.74359		25.13	0.213333		25.65	0.130435			25.33	0.555		25.2	0.799107		45.38	0.333333		25.27	0.386667		25.1	0.246377
25.2	0.195		25.56	0.205357		46.27	0.769231		25.31	0.16		25.81	0.115942			25.43	0.565		25.36	0.790179		45.48	0.333333		25.42	0.413333		25.31	0.275362
25.45	0.19		25.82	0.200893		46.3	0.769231		25.56	0.173333		26.1	0.101449			25.6	0.635		25.63	0.803571		45.67	0.307692		25.67	0.413333		25.54	0.289855
25.7	0.19		25.94	0.196429		46.47	0.74359		25.67	0.2		26.17	0.130435			25.88	0.605		25.77	0.803571		46.04	0.384615		25.85	0.36		25.7	0.231884
25.9	0.19		26.17	0.209821		46.65	0.692308		25.88	0.186667		26.49	0.115942			26.07	0.595		26.03	0.825893		46.01	0.333333		26.1	0.373333		25.88	0.275362
26.07	0.195		26.37	0.205357		47.02	0.717949		26.02	0.2		26.7	0.130435			26.23	0.59		26.26	0.808036		46.35	0.333333		26.26	0.346667		26.02	0.275362
26.3	0.195		26.61	0.205357		47.2	0.692308		26.27	0.2		26.78	0.115942			26.39	0.61		26.44	0.790179		46.45	0.358974		26.49	0.426667		26.25	0.202899
26.48	0.19		26.78	0.209821		47.26	0.769231		26.57	0.213333		26.99	0.130435			26.7	0.615		26.62	0.794643		46.57	0.410256		26.63	0.373333		26.42	0.289855
26.69	0.195		26.92	0.214286		47.55	0.794872		26.69	0.186667		27.18	0.130435			26.85	0.585		26.85	0.785714		46.7	0.333333		26.95	0.386667		26.69	0.275362
26.93	0.2		27.18	0.227679		47.84	0.794872		26.82	0.186667		27.44	0.144928			27	0.61		27	0.790179		46.86	0.384615		27.02	0.386667		26.88	0.275362
27.09	0.21		27.43	0.241071		48.34	0.794872		27.06	0.2		27.65	0.130435			27.23	0.61		27.25	0.799107		47.21	0.307692		27.32	0.36		27.07	0.246377
27.27	0.2		27.61	0.223214		48.28	0.717949		27.29	0.2		27.85	0.144928			27.43	0.595		27.42	0.785714		47.4	0.307692		27.59	0.413333		27.25	0.275362
27.67	0.195		27.68	0.232143		48.63	0.74359		27.45	0.2		28	0.130435			27.59	0.6		27.61	0.803571		47.67	0.333333		27.7	0.373333		27.44	0.26087
27.91	0.21		28.02	0.214286		48.46	0.769231		27.67	0.2		28.27	0.144928			27.82	0.61		27.8	0.808036		47.73	0.384615		27.87	0.386667		27.61	0.246377
28.09	0.2		28.11	0.232143		48.77	0.74359		27.9	0.24		28.45	0.144928			27.99	0.605		27.99	0.78125		47.81	0.333333		28.09	0.386667		27.93	0.231884
28.3	0.2		28.36	0.236607		48.99	0.871795		28.05	0.2		28.7	0.115942			28.22	0.635		28.13	0.790179		48.19	0.333333		28.29	0.386667		28.06	0.275362
28.56	0.205		28.56	0.236607		49.35	0.846154		28.24	0.2		28.88	0.130435			28.41	0.61		28.45	0.763393		48.54	0.307692		28.5	0.36		28.38	0.231884
28.77	0.2		28.75	0.245536		49.38	0.820513		28.47	0.186667		29.02	0.130435			28.56	0.62		28.63	0.790179		48.5	0.307692		28.68	0.373333		28.45	0.217391
28.98	0.225		28.98	0.25		49.49	0.769231		28.63	0.213333		29.41	0.130435			28.81	0.655		28.8	0.776786		49.02	0.333333		28.86	0.36		28.67	0.26087
29.1	0.2		29.18	0.241071		49.73	0.846154		28.81	0.173333		29.43	0.15942			29.02	0.635		29.02	0.772321		49.03	0.282051		29.06	0.4		28.81	0.231884
29.38	0.21		29.39	0.254464		49.94	0.820513		29.02	0.226667		29.7	0.15942			29.3	0.615		29.22	0.758929		49.29	0.333333		29.29	0.346667		28.98	0.231884
29.52	0.205		29.63	0.236607		50.27	0.74359		29.12	0.24		29.82	0.130435			29.47	0.635		29.43	0.790179		49.49	0.282051		29.49	0.373333		29.18	0.275362
29.66	0.23		29.86	0.241071		50.38	0.820513		29.39	0.213333		30	0.144928			29.63	0.645		29.57	0.754464		49.54	0.358974		29.66	0.373333		29.43	0.275362
29.94	0.225		30	0.258929		50.79	0.820513		29.68	0.213333		30.17	0.173913			29.87	0.63		29.88	0.758929		49.84	0.307692		29.85	0.373333		29.67	0.275362
30.04	0.22		30.11	0.25		50.89	0.769231		29.84	0.213333		30.41	0.173913			30.05	0.61		29.98	0.790179		50.09	0.358974		30.16	0.386667		29.87	0.246377
30.25	0.215		30.39	0.267857		50.86	0.74359		30.06	0.213333		30.57	0.15942			30.29	0.625		30.25	0.745536		50.39	0.333333		30.36	0.4		29.97	0.26087
30.44	0.21		30.55	0.245536		51.14	0.794872		30.27	0.226667		30.93	0.15942			30.42	0.6		30.48	0.727679		50.39	0.307692		30.5	0.36		30.27	0.231884
30.6	0.21		30.74	0.290179		51.49	0.871795		30.43	0.24		31.01	0.15942			30.58	0.63		30.66	0.732143		50.63	0.282051		30.69	0.4		30.51	0.246377
30.73	0.235		30.98	0.285714		51.44	0.794872		30.66	0.2		31.2	0.173913			30.83	0.63		30.83	0.754464		50.66	0.282051		30.92	0.4		30.66	0.289855
30.94	0.2		31.2	0.263393		51.47	0.820513		30.88	0.226667		31.37	0.202899			31.01	0.625		31.07	0.758929		51.14	0.282051		31.13	0.373333		30.83	0.246377
31.17	0.205		31.38	0.294643		51.91	0.846154		31.1	0.24		31.67	0.173913			31.1	0.615		31.37	0.754464		51.12	0.333333		31.31	0.373333		31.12	0.246377
31.26	0.225		31.56	0.290179		52.11	0.820513		31.28	0.226667		31.81	0.188406			31.4	0.61		31.38	0.763393		51.34	0.333333		31.51	0.386667		31.31	0.217391
31.59	0.225		31.77	0.299107		52.23	0.820513		31.54	0.24		31.97	0.188406			31.49	0.57		31.64	0.732143		51.51	0.333333		31.7	0.32		31.49	0.231884
31.74	0.21		32.02	0.294643		52.35	0.794872		31.64	0.226667		32.36	0.130435			31.75	0.6		31.81	0.700893		51.89	0.333333		31.93	0.373333		31.69	0.26087
31.88	0.215		32.2	0.294643		52.76	0.846154		31.85	0.24		32.53	0.173913			32.05	0.615		32.09	0.727679		51.93	0.307692		32.17	0.373333		31.93	0.26087
32.25	0.22		32.34	0.294643		52.56	0.846154		32.04	0.253333		32.6	0.217391			32.22	0.59		32.27	0.696429		52.31	0.307692		32.32	0.36		32.06	0.231884
32.31	0.23		32.53	0.3125		53.13	0.794872		32.29	0.24		32.77	0.217391			32.34	0.6		32.49	0.705357		52.29	0.307692		32.48	0.386667		32.24	0.26087
32.64	0.23		32.74	0.316964		53.1	0.820513		32.49	0.266667		33.09	0.231884			32.55	0.61		32.74	0.727679		52.49	0.333333		32.74	0.413333		32.5	0.26087
32.74	0.215		32.96	0.308036		53.31	0.897436		32.59	0.253333		33.22	0.202899			32.8	0.595		32.82	0.691964		52.73	0.333333		32.96	0.346667		32.63	0.246377
32.97	0.24		33.21	0.321429		53.6	0.820513		32.83	0.253333		33.43	0.202899			33.04	0.59		33.01	0.732143		53.04	0.307692		32.96	0.373333		32.87	0.231884
33.15	0.24		33.41	0.325893		53.95	0.871795		32.99	0.253333		33.67	0.217391			33.22	0.585		33.17	0.700893		52.99	0.333333		33.34	0.4		33.06	0.231884
33.32	0.25		33.6	0.325893		54.18	0.897436		33.27	0.266667		33.93	0.26087			33.47	0.565		33.42	0.700893		53.24	0.333333		33.54	0.373333		33.24	0.26087
33.55	0.245		33.78	0.334821		54.39	0.794872		33.38	0.28		34.07	0.246377			33.7	0.575		33.73	0.660714		53.39	0.333333		33.6	0.373333		33.45	0.26087
33.77	0.22		33.99	0.334821		54.56	0.769231		33.64	0.24		34.27	0.246377			33.86	0.595		33.85	0.6875		53.78	0.333333		33.89	0.36		33.68	0.231884
33.95	0.215		34.1	0.334821		54.55	0.769231		33.86	0.24		34.48	0.202899			34.01	0.615		34.01	0.65625		53.94	0.307692		34.1	0.346667		33.86	0.246377
34.21	0.235		34.36	0.339286		54.88	0.717949		34.07	0.253333		34.69	0.231884			34.2	0.555		34.27	0.638393		54.07	0.333333		34.27	0.333333		34.03	0.231884
34.38	0.255		34.54	0.348214		54.98	0.717949		34.24	0.253333		34.75	0.246377			34.49	0.58		34.4	0.647321		54.4	0.307692		34.47	0.386667		34.21	0.188406
34.63	0.24		34.77	0.348214		55.17	0.794872		34.47	0.266667		35.05	0.246377			34.75	0.57		34.63	0.651786		54.33	0.358974		34.71	0.346667		34.42	0.246377
34.67	0.23		34.92	0.357143		55.19	0.820513		34.74	0.306667		35.33	0.231884			34.97	0.54		34.86	0.625		54.7	0.307692		34.92	0.306667		34.63	0.246377
35.03	0.235		35.17	0.375		55.55	0.820513		34.99	0.266667		35.59	0.217391			35.12	0.575		35.05	0.611607		54.9	0.307692		35.05	0.333333		34.81	0.217391
35.22	0.26		35.3	0.361607		55.81	0.871795		35.12	0.266667		35.69	0.231884			35.29	0.575		35.2	0.620536		55.06	0.333333		35.25	0.333333		34.99	0.231884
35.38	0.25		35.56	0.375		56.05	0.717949		35.38	0.293333		35.84	0.231884			35.45	0.545		35.41	0.616071		55.26	0.282051		35.49	0.306667		35.27	0.26087
35.5	0.245		35.77	0.370536		56.23	0.769231		35.5	0.293333		36.04	0.275362			35.67	0.565		35.61	0.620536		55.63	0.333333		35.61	0.36		35.56	0.217391
35.85	0.24		35.97	0.383929		56.44	0.820513		35.74	0.266667		36.13	0.275362			35.81	0.565		35.8	0.602679		55.77	0.384615		35.92	0.346667		35.69	0.246377
36.06	0.265		36.2	0.392857		56.56	0.692308		35.99	0.253333		36.42	0.26087			36.18	0.52		36.04	0.59375		55.97	0.307692		36.06	0.346667		35.89	0.188406
36.27	0.245		36.39	0.392857		56.82	0.717949		36.1	0.266667		36.6	0.26087			36.24	0.56		36.22	0.59375		56.07	0.333333		36.22	0.293333		36.06	0.217391
36.37	0.265		36.55	0.415179		56.89	0.692308		36.31	0.28		36.9	0.26087			36.45	0.555		36.44	0.611607		56.36	0.358974		36.44	0.306667		36.27	0.246377
36.6	0.27		36.84	0.410714		57.1	0.769231		36.57	0.293333		37.03	0.275362			36.63	0.54		36.64	0.584821		56.54	0.358974		36.65	0.32		36.49	0.231884
36.81	0.235		37.02	0.428571		57.27	0.794872		36.7	0.306667		37.24	0.26087			36.67	0.52		36.85	0.566964		56.77	0.358974		36.88	0.333333		36.67	0.217391
36.98	0.285		37.12	0.415179		57.69	0.74359		36.9	0.333333		37.4	0.275362			36.99	0.52		37.02	0.544643		56.74	0.358974		37.06	0.32		36.88	0.231884
37.2	0.255		37.31	0.415179		57.81	0.717949		37.03	0.28		37.55	0.289855			37.17	0.525		37.2	0.53125		57.02	0.333333		37.28	0.32		37.03	0.26087
37.45	0.255		37.63	0.433036		58.02	0.666667		37.21	0.306667		37.85	0.275362			37.38	0.505		37.38	0.549107		57.17	0.384615		37.49	0.306667		37.21	0.231884
37.57	0.25		37.76	0.419643		58.2	0.666667		37.5	0.306667		38.02	0.26087			37.63	0.48		37.64	0.558036		57.35	0.384615		37.68	0.293333		37.45	0.217391
37.83	0.275		37.95	0.464286		58.43	0.692308		37.68	0.293333		38.31	0.289855			37.83	0.54		37.85	0.540179		57.76	0.358974		37.9	0.306667		37.67	0.231884
38.06	0.265		38.15	0.46875		58.85	0.769231		37.85	0.293333		38.49	0.318841			37.93	0.505		37.97	0.517857		57.68	0.358974		38.04	0.28		37.87	0.188406
38.25	0.26		38.45	0.459821		59.18	0.641026		38.09	0.266667		38.72	0.304348			38.13	0.49		38.18	0.5		58.17	0.358974		38.28	0.28		38	0.217391
38.45	0.275		38.53	0.486607		59.25	0.666667		38.24	0.306667		38.91	0.289855			38.42	0.48		38.49	0.517857		58.3	0.307692		38.47	0.32		38.22	0.202899
38.7	0.295		38.73	0.450893		59.52	0.589744		38.47	0.32		38.99	0.304348			38.65	0.47		38.66	0.495536		58.36	0.333333		38.68	0.293333		38.51	0.231884
38.91	0.275		39.02	0.491071		59.75	0.641026		38.68	0.346667		39.2	0.304348			38.77	0.485		38.77	0.491071		58.56	0.358974		38.91	0.28		38.67	0.231884
39.09	0.28		39.17	0.473214		59.55	0.641026		38.89	0.306667		39.43	0.318841			38.95	0.475		38.95	0.495536		58.87	0.358974		39.13	0.306667		38.89	0.202899
39.35	0.29		39.39	0.477679		60.17	0.666667		39.06	0.306667		39.58	0.333333			39.24	0.46		39.16	0.477679		59.1	0.384615		39.25	0.306667		39.06	0.231884
39.55	0.275		39.63	0.491071		59.88	0.615385		39.2	0.293333		39.96	0.362319			39.46	0.43		39.43	0.46875		59.2	0.461538		39.52	0.266667		39.18	0.246377
39.63	0.29		39.74	0.522321		60.16	0.589744		39.46	0.293333		40.11	0.333333			39.6	0.445		39.7	0.495536		59.33	0.384615		39.66	0.28		39.42	0.202899
39.8	0.29		40	0.508929		60.55	0.589744		39.61	0.293333		40.32	0.318841			39.82	0.445		39.77	0.482143		59.74	0.384615		39.91	0.28		39.7	0.231884
40.1	0.305		40.23	0.526786		60.79	0.564103		39.81	0.32		40.48	0.347826			39.99	0.465		40.02	0.473214		59.81	0.384615		40.05	0.28		39.92	0.202899
40.27	0.295		40.38	0.526786		60.83	0.589744		40.02	0.333333		40.6	0.333333			40.2	0.475		40.27	0.450893		60.22	0.384615		40.27	0.266667		40.11	0.202899
40.46	0.29		40.54	0.535714		60.94	0.512821		40.17	0.32		40.81	0.362319			40.5	0.415		40.45	0.4375		60.27	0.384615		40.44	0.253333		40.23	0.202899
40.66	0.32		40.79	0.566964		61.25	0.615385		40.39	0.306667		40.99	0.347826			40.56	0.46		40.7	0.4375		60.56	0.358974		40.67	0.253333		40.45	0.217391
40.81	0.295		41.08	0.522321		61.23	0.461538		40.6	0.333333		41.31	0.347826			40.81	0.425		40.81	0.441964		60.63	0.410256		40.87	0.266667		40.7	0.173913
41.04	0.3		41.2	0.571429		61.56	0.512821		40.79	0.32		41.51	0.42029			41.06	0.435		40.99	0.410714		60.81	0.358974		41.06	0.226667		40.79	0.202899
41.2	0.325		41.4	0.580357		61.72	0.538462		40.99	0.36		41.68	0.376812			41.17	0.42		41.32	0.410714		61.02	0.384615		41.32	0.226667		40.99	0.217391
41.49	0.315		41.63	0.598214		61.93	0.512821		41.27	0.333333		41.88	0.333333			41.42	0.435		41.46	0.401786		61.2	0.435897		41.45	0.266667		41.24	0.202899
41.61	0.305		41.71	0.589286		62.11	0.487179		41.42	0.32		42.05	0.347826			41.67	0.395		41.59	0.401786		61.35	0.358974		41.58	0.266667		41.49	0.217391
41.77	0.32		42.02	0.616071		62.31	0.435897		41.63	0.333333		42.14	0.333333			41.77	0.39		41.88	0.392857		61.59	0.358974		41.82	0.226667		41.66	0.173913
42.05	0.31		42.05	0.602679		62.31	0.435897		41.8	0.333333		42.34	0.362319			42	0.385		42	0.397321		61.64	0.333333		42.06	0.253333		41.85	0.231884
42.12	0.315		42.45	0.598214		62.6	0.461538		42.04	0.306667		42.64	0.347826			42.17	0.43		42.24	0.375		62.06	0.333333		42.28	0.24		42.02	0.202899
42.38	0.35		42.61	0.625		62.87	0.410256		42.27	0.373333		42.88	0.449275			42.38	0.415		42.49	0.366071		62.22	0.435897		42.42	0.226667		42.23	0.202899
42.56	0.345		42.83	0.602679		63.19	0.435897		42.41	0.293333		43.06	0.347826			42.59	0.385		42.64	0.370536		62.47	0.410256		42.6	0.226667		42.45	0.188406
42.81	0.32		42.95	0.647321		63.03	0.435897		42.61	0.346667		43.17	0.376812			42.74	0.36		42.84	0.352679		62.56	0.410256		42.85	0.24		42.64	0.188406
42.95	0.315		43.17	0.665179		63.22	0.435897		42.81	0.346667		43.49	0.347826			43.03	0.37		43.1	0.339286		62.88	0.384615		43.05	0.213333		42.79	0.202899
43.17	0.35		43.37	0.660714		63.89	0.384615		43.07	0.333333		43.67	0.376812			43.17	0.385		43.31	0.352679		62.88	0.333333		43.22	0.253333		43.01	0.188406
43.27	0.345		43.58	0.6875		63.92	0.410256		43.22	0.293333		43.74	0.405797			43.42	0.35		43.51	0.339286		63.19	0.384615		43.47	0.213333		43.25	0.217391
43.63	0.315		43.81	0.674107		64.24	0.435897		43.41	0.32		43.92	0.318841			43.61	0.365		43.67	0.357143		63.22	0.358974		43.68	0.213333		43.42	0.202899
43.8	0.345		43.99	0.709821		64.13	0.384615		43.63	0.373333		44.27	0.405797			43.72	0.355		43.9	0.321429		63.62	0.435897		43.95	0.226667		43.63	0.217391
43.99	0.345		44.17	0.709821		64.26	0.358974		43.88	0.346667		44.45	0.362319			44.12	0.35		44.07	0.330357		63.77	0.410256		44.16	0.253333		43.83	0.202899
44.16	0.35		44.42	0.732143		64.59	0.410256		44.1	0.36		44.67	0.405797			44.18	0.325		44.26	0.325893		63.95	0.384615		44.25	0.2		44.04	0.173913
44.31	0.355		44.52	0.732143		64.67	0.333333		44.27	0.36		44.87	0.405797			44.43	0.37		44.38	0.325893		64.12	0.307692		44.51	0.2		44.19	0.15942
44.58	0.365		44.82	0.745536		64.88	0.384615		44.49	0.386667		45.11	0.405797			44.67	0.36		44.6	0.316964		64.4	0.461538		44.69	0.266667		44.43	0.188406
44.8	0.375		44.99	0.709821		65.4	0.358974		44.62	0.346667		45.28	0.362319			44.78	0.335		44.78	0.299107		64.42	0.410256		44.91	0.226667		44.63	0.188406
44.96	0.36		45.24	0.763393		65.55	0.384615		44.87	0.36		45.35	0.42029			45.09	0.325		45.08	0.299107		64.69	0.410256		45.08	0.213333		44.87	0.202899
45.13	0.39		45.4	0.75		65.45	0.358974		44.99	0.373333		45.58	0.391304			45.2	0.325		45.2	0.294643		64.9	0.384615		45.4	0.2		44.93	0.217391
45.38	0.375		45.64	0.78125		66.01	0.333333		45.19	0.373333		45.86	0.376812			45.42	0.32		45.45	0.303571		65.06	0.358974		45.5	0.213333		45.27	0.15942
45.57	0.37		45.86	0.754464		66.2	0.358974		45.42	0.373333		46.03	0.391304			45.63	0.295		45.62	0.294643		65.37	0.384615		45.71	0.2		45.42	0.188406
45.79	0.36		45.99	0.767857		66.13	0.384615		45.67	0.36		46.27	0.42029			45.78	0.32		45.88	0.285714		65.59	0.410256		45.84	0.213333		45.6	0.202899
45.95	0.375		46.13	0.816964		66.44	0.358974		45.92	0.4		46.4	0.405797			46.06	0.31		46.03	0.28125		65.7	0.410256		46.06	0.213333		45.85	0.173913
46.23	0.385		46.37	0.790179		66.74	0.333333		46.13	0.36		46.6	0.391304			46.35	0.31		46.24	0.258929		66.1	0.384615		46.27	0.24		46.01	0.173913
46.33	0.385		46.62	0.821429		66.95	0.333333		46.31	0.36		46.86	0.362319			46.45	0.3		46.38	0.294643		66.06	0.410256		46.4	0.213333		46.27	0.202899
46.63	0.385		46.89	0.8125		67.22	0.435897		46.52	0.346667		46.93	0.405797			46.6	0.315		46.62	0.254464		66.34	0.384615		46.7	0.226667		46.43	0.217391
46.85	0.4		47.02	0.8125		67.27	0.333333		46.74	0.36		47.23	0.42029			46.77	0.295		46.81	0.263393		66.52	0.333333		46.81	0.226667		46.67	0.217391
46.95	0.385		47.08	0.803571		67.43	0.307692		46.92	0.373333		47.41	0.391304			47.04	0.295		47.06	0.272321		66.73	0.384615		46.99	0.2		46.88	0.202899
47.1	0.39		47.4	0.839286		67.8	0.333333		47.04	0.36		47.63	0.376812			47.13	0.29		47.2	0.25		67.02	0.410256		47.24	0.186667		47.06	0.173913
47.4	0.385		47.6	0.875		68.06	0.333333		47.2	0.36		47.84	0.376812			47.41	0.305		47.34	0.254464		67.04	0.410256		47.48	0.213333		47.17	0.202899
47.54	0.415		47.79	0.839286		68.15	0.333333		47.49	0.386667		48.04	0.376812			47.55	0.27		47.62	0.25		67.42	0.384615		47.7	0.186667		47.34	0.173913
47.74	0.405		47.96	0.861607		68.6	0.282051		47.66	0.36		48.19	0.391304			47.77	0.3		47.75	0.245536		67.56	0.435897		47.88	0.2		47.63	0.173913
47.94	0.41		48.2	0.84375		68.77	0.333333		47.86	0.4		48.43	0.449275			47.95	0.275		47.99	0.241071		67.63	0.410256		47.99	0.146667		47.84	0.188406
48.16	0.4		48.34	0.915179		68.72	0.384615		48.06	0.413333		48.52	0.376812			48.16	0.295		48.27	0.236607		67.91	0.384615		48.12	0.186667		48	0.188406
48.41	0.4		48.52	0.892857		68.87	0.333333		48.28	0.373333		48.82	0.391304			48.41	0.255		48.41	0.245536		67.99	0.358974		48.43	0.186667		48.18	0.188406
48.63	0.41		48.83	0.910714		69.1	0.358974		48.43	0.333333		49.06	0.405797			48.59	0.255		48.63	0.227679		68.46	0.333333		48.61	0.173333		48.46	0.202899
48.81	0.425		48.88	0.897321		69.06	0.333333		48.66	0.4		49.32	0.405797			48.8	0.295		48.8	0.232143		68.42	0.410256		48.85	0.173333		48.63	0.202899
48.99	0.45		49.18	0.941964		69.4	0.307692		48.86	0.36		49.49	0.405797			49.02	0.245		49.02	0.232143		68.77	0.435897		49.06	0.16		48.86	0.217391
49.22	0.435		49.31	0.941964		69.56	0.307692		49.13	0.373333		49.69	0.42029			49.11	0.27		49.29	0.223214		68.99	0.384615		49.31	0.16		49.08	0.15942
49.42	0.43		49.52	0.941964		69.79	0.307692		49.27	0.386667		49.89	0.42029			49.38	0.255		49.48	0.232143		69.27	0.384615		49.49	0.2		49.25	0.202899
49.62	0.445		49.69	0.950893		70.02	0.358974		49.45	0.386667		50.01	0.376812			49.61	0.265		49.56	0.241071		69.39	0.384615		49.67	0.173333		49.49	0.231884
49.81	0.435		49.92	0.941964		70.17	0.333333		49.64	0.346667		50.28	0.42029			49.75	0.275		49.81	0.232143		69.36	0.384615		49.82	0.173333		49.65	0.217391
50.07	0.425		50.12	0.959821		70.47	0.384615		49.8	0.4		50.45	0.405797			49.94	0.24		49.99	0.223214		69.57	0.384615		50.04	0.173333		49.88	0.202899
50.24	0.45		50.36	0.964286		70.51	0.358974		50.01	0.346667		50.61	0.391304			50.07	0.245		50.19	0.236607		70.01	0.384615		50.26	0.173333		50.01	0.217391
50.41	0.445		50.6	0.982143		70.74	0.333333		50.19	0.36		50.76	0.405797			50.35	0.245		50.31	0.21875		70	0.410256		50.47	0.186667		50.21	0.217391
50.64	0.45		50.82	0.995536		71.03	0.333333		50.49	0.333333		51	0.376812			50.59	0.25		50.58	0.21875		70.17	0.410256		50.62	0.2		50.38	0.202899
50.93	0.445		50.99	0.955357		71.07	0.333333		50.59	0.373333		51.17	0.405797			50.79	0.255		50.76	0.223214		70.42	0.487179		50.77	0.146667		50.59	0.188406
51	0.455		51.2	0.986607		71.36	0.307692		50.81	0.36		51.44	0.449275			51	0.23		50.96	0.232143		70.43	0.435897		50.96	0.16		50.77	0.202899
51.29	0.455		51.42	1.00446		71.42	0.333333		50.88	0.36		51.56	0.376812			51.18	0.255		51.23	0.214286		70.91	0.435897		51.18	0.16		50.94	0.202899
51.44	0.445		51.56	1		71.83	0.358974		51.12	0.386667		51.79	0.434783			51.31	0.25		51.31	0.227679		71.06	0.410256		51.41	0.186667		51.12	0.231884
51.63	0.44		51.75	1.03571		71.94	0.333333		51.38	0.36		52.05	0.362319			51.63	0.245		51.65	0.232143		71.2	0.461538		51.66	0.173333		51.49	0.188406
51.78	0.445		51.99	1.04911		72.19	0.333333		51.66	0.32		52.24	0.391304			51.81	0.245		51.81	0.241071		71.5	0.410256		51.85	0.186667		51.59	0.202899
52	0.455		52.12	1.01339		72.37	0.384615		51.81	0.413333		52.49	0.405797			52.02	0.245		51.98	0.214286		71.56	0.384615		52.03	0.173333		51.85	0.202899
52.17	0.455		52.29	0.96875		72.56	0.358974		52.09	0.306667		52.68	0.405797			52.2	0.245		52.23	0.232143		71.77	0.435897		52.27	0.16		52	0.202899
52.38	0.43		52.45	1.0625		72.7	0.410256		52.23	0.346667		52.8	0.405797			52.38	0.25		52.38	0.223214		72.06	0.461538		52.42	0.146667		52.23	0.217391
52.46	0.435		52.7	0.995536		72.73	0.333333		52.47	0.386667		53.04	0.376812			52.56	0.215		52.62	0.241071		72.32	0.384615		52.69	0.173333		52.4	0.246377
52.75	0.435		52.93	1.05357		73.13	0.358974		52.62	0.333333		53.22	0.391304			52.73	0.235		52.8	0.241071		72.43	0.410256		52.94	0.16		52.64	0.217391
52.93	0.445		53.06	1.01339		73.45	0.358974		52.75	0.386667		53.41	0.405797			53.06	0.225		53.01	0.21875		72.75	0.410256		53.04	0.146667		52.82	0.202899
53.13	0.455		53.34	1.04018		73.71	0.358974		52.98	0.36		53.59	0.434783			53.19	0.225		53.13	0.241071		72.69	0.435897		53.2	0.133333		52.98	0.202899
53.28	0.425		53.52	1.03571		73.93	0.307692		53.2	0.32		53.76	0.362319			53.33	0.215		53.38	0.236607		73	0.435897		53.36	0.146667		53.21	0.231884
53.52	0.435		53.77	1.04464		73.91	0.307692		53.33	0.333333		54.05	0.391304			53.64	0.225		53.5	0.245536		73.23	0.410256		53.63	0.146667		53.41	0.231884
53.79	0.455		53.95	1.0625		74.1	0.410256		53.54	0.373333		54.17	0.405797			53.79	0.215		53.82	0.236607		73.47	0.435897		53.78	0.16		53.61	0.231884
53.92	0.445		54.14	1.04911		74.13	0.333333		53.77	0.346667		54.31	0.405797			54	0.245		53.97	0.223214		73.49	0.435897		53.96	0.16		53.81	0.231884
54.02	0.43		54.35	1.0625		74.51	0.410256		53.96	0.373333		54.6	0.42029			54.18	0.22		54.2	0.25		73.59	0.435897		54.17	0.146667		53.99	0.246377
54.23	0.44		54.51	1.01339		74.59	0.410256		54.13	0.36		54.77	0.391304			54.42	0.235		54.45	0.227679		73.99	0.487179		54.35	0.133333		54.24	0.246377
54.45	0.44		54.77	1.03125		74.97	0.435897		54.37	0.32		55	0.376812			54.63	0.235		54.6	0.245536		74.31	0.435897		54.62	0.173333		54.49	0.202899
54.68	0.425		54.95	1.04018		75.15	0.410256		54.56	0.293333		55.22	0.391304			54.77	0.225		54.79	0.241071		74.35	0.461538		54.79	0.133333		54.58	0.246377
54.93	0.415		55.15	1.00893		75.24	0.333333		54.8	0.306667		55.38	0.434783			55	0.24		55.01	0.236607		74.69	0.487179		55	0.16		54.81	0.231884
55.1	0.41		55.36	1.06696		75.55	0.435897		55.03	0.333333		55.62	0.376812			55.2	0.225		55.18	0.245536		74.74	0.435897		55.22	0.16		55.02	0.217391
55.38	0.425		55.62	1.01786		75.65	0.384615		55.22	0.306667		55.79	0.347826			55.39	0.245		55.39	0.258929		74.85	0.512821		55.38	0.12		55.16	0.217391
55.59	0.4		55.79	1		75.81	0.410256		55.31	0.32		55.97	0.376812			55.52	0.225		55.59	0.267857		75.29	0.512821		55.59	0.146667		55.44	0.231884
55.7	0.405		55.95	1.00893		76.17	0.435897		55.61	0.306667		56.17	0.391304			55.83	0.23		55.77	0.263393		75.42	0.589744		55.85	0.133333		55.54	0.26087
55.9	0.41		56.13	1.02232		76.14	0.461538		55.83	0.28		56.41	0.347826			55.98	0.23		55.97	0.267857		75.81	0.487179		56.02	0.133333		55.85	0.217391
56.14	0.405		56.38	0.977679		76.52	0.435897		56.02	0.32		56.51	0.347826			56.09	0.23		56.17	0.267857		75.67	0.538462		56.19	0.146667		56	0.231884
56.31	0.38		56.48	0.995536		76.77	0.435897		56.2	0.293333		56.81	0.333333			56.33	0.26		56.38	0.276786		75.95	0.538462		56.46	0.16		56.17	0.217391
56.59	0.395		56.72	0.986607		76.99	0.410256		56.43	0.266667		57.04	0.391304			56.53	0.245		56.54	0.272321		76.27	0.512821		56.64	0.12		56.38	0.246377
56.74	0.39		56.92	0.950893		77.1	0.461538		56.71	0.293333		57.16	0.333333			56.71	0.25		56.7	0.272321		76.42	0.564103		56.86	0.106667		56.56	0.246377
56.98	0.38		57.13	0.973214		77.29	0.435897		56.95	0.266667		57.36	0.289855			56.98	0.225		56.9	0.294643		76.63	0.564103		56.98	0.12		56.74	0.246377
57.18	0.365		57.32	0.96875		77.51	0.384615		57.08	0.293333		57.59	0.333333			57.23	0.24		57.12	0.294643		76.9	0.615385		57.24	0.133333		56.92	0.217391
57.35	0.36		57.49	0.879464		77.79	0.461538		57.25	0.28		57.81	0.333333			57.35	0.23		57.35	0.28125		76.97	0.564103		57.42	0.12		57.16	0.217391
57.51	0.355		57.71	0.941964		77.88	0.487179		57.5	0.253333		57.96	0.333333			57.59	0.23		57.56	0.308036		77.1	0.589744		57.53	0.0933333		57.4	0.231884
57.81	0.365		57.92	0.924107		78.07	0.435897		57.63	0.266667		58.15	0.333333			57.78	0.25		57.74	0.294643		77.45	0.589744		57.78	0.106667		57.61	0.231884
57.92	0.365		58.1	0.90625		78.42	0.512821		57.88	0.24		58.41	0.275362			57.96	0.25		57.99	0.294643		77.41	0.589744		58.02	0.12		57.85	0.217391
58.2	0.345		58.3	0.901786		78.52	0.435897		58.05	0.24		58.61	0.289855			58.06	0.235		58.14	0.316964		77.65	0.641026		58.22	0.12		58.02	0.246377
58.34	0.355		58.45	0.883929					58.17	0.226667		58.76	0.289855			58.33	0.25		58.31	0.308036					58.38	0.133333		58.15	0.275362
58.5	0.375		58.79	0.852679					58.42	0.253333		58.95	0.246377			58.59	0.24		58.54	0.303571					58.61	0.133333		58.4	0.202899
58.7	0.32		58.88	0.825893					58.61	0.24		59.21	0.275362			58.64	0.24		58.74	0.303571					58.85	0.12		58.56	0.246377
58.97	0.365		59.13	0.834821					58.79	0.253333		59.33	0.246377			59.02	0.23		58.94	0.316964					59.02	0.133333		58.79	0.275362
59.1	0.325		59.31	0.830357					59.03	0.226667		59.62	0.231884			59.11	0.275		59.16	0.348214					59.21	0.106667		59.02	0.246377
59.35	0.315		59.46	0.785714					59.16	0.213333		59.78	0.246377			59.24	0.245		59.38	0.348214					59.39	0.106667		59.21	0.231884
59.52	0.3		59.7	0.825893					59.41	0.213333		59.96	0.275362			59.57	0.25		59.56	0.334821					59.65	0.133333		59.38	0.202899
59.63	0.315		59.93	0.776786					59.55	0.2		60.21	0.246377			59.67	0.23		59.78	0.330357					59.85	0.12		59.64	0.217391
59.93	0.3		60.09	0.758929					59.77	0.213333		60.38	0.202899			59.92	0.245		60	0.334821					59.99	0.133333		59.81	0.231884
60.19	0.295		60.35	0.754464					59.94	0.213333		60.61	0.217391			60.17	0.255		60.13	0.334821					60.17	0.12		59.95	0.231884
60.35	0.265		60.5	0.709821					60.13	0.213333		60.85	0.202899			60.42	0.275		60.35	0.361607					60.37	0.12		60.13	0.231884
60.5	0.285		60.68	0.714286					60.32	0.2		61.02	0.202899			60.65	0.25		60.58	0.366071					60.56	0.12		60.35	0.26087
60.83	0.28		60.93	0.700893					60.5	0.186667		61.2	0.231884			60.75	0.245		60.76	0.348214					60.73	0.12		60.58	0.231884
60.95	0.275		61.1	0.678571					60.77	0.186667		61.36	0.188406			60.92	0.245		60.99	0.357143					61.04	0.106667		60.73	0.202899
61.15	0.245		61.34	0.65625					60.96	0.186667		61.6	0.202899			61.22	0.245		61.16	0.348214					61.26	0.0933333		61.05	0.26087
61.37	0.28		61.56	0.629464					61.1	0.2		61.77	0.188406			61.42	0.225		61.3	0.366071					61.42	0.106667		61.18	0.231884
61.6	0.255		61.65	0.611607					61.36	0.213333		61.96	0.188406			61.51	0.25		61.51	0.34375					61.67	0.0933333		61.34	0.275362
61.82	0.245		61.92	0.558036					61.44	0.186667		62.23	0.173913			61.73	0.23		61.74	0.366071					61.76	0.12		61.61	0.275362
61.96	0.265		62.12	0.589286					61.8	0.2		62.32	0.173913			61.93	0.265		61.9	0.357143					61.96	0.106667		61.75	0.275362
62.15	0.23		62.31	0.571429					62.01	0.213333		62.58	0.173913			62.17	0.24		62.13	0.357143					62.2	0.133333		61.95	0.217391
62.32	0.24		62.52	0.558036					62.1	0.2		62.69	0.144928			62.32	0.25		62.33	0.379464					62.38	0.12		62.23	0.246377
62.5	0.24		62.72	0.549107					62.32	0.2		62.92	0.15942			62.49	0.24		62.56	0.375					62.63	0.106667		62.4	0.231884
62.69	0.235		62.84	0.549107					62.54	0.173333		63.2	0.173913			62.77	0.24		62.77	0.352679					62.82	0.106667		62.56	0.246377
62.88	0.24		63.09	0.477679					62.72	0.213333		63.42	0.173913			62.95	0.25		62.88	0.388393					63	0.106667		62.79	0.231884
63.13	0.235		63.32	0.459821					62.92	0.2		63.55	0.15942			63.18	0.25		63.1	0.388393					63.16	0.12		62.95	0.231884
63.35	0.22		63.51	0.464286					63.14	0.2		63.82	0.15942			63.31	0.235		63.31	0.375					63.38	0.12		63.17	0.26087
63.45	0.235		63.68	0.46875					63.27	0.186667		63.97	0.173913			63.51	0.225		63.48	0.357143					63.51	0.106667		63.39	0.246377
63.74	0.22		63.8	0.473214					63.52	0.173333		64.12	0.130435			63.74	0.22		63.72	0.357143					63.79	0.0933333		63.53	0.26087
63.9	0.23		64	0.424107					63.74	0.173333		64.45	0.130435			63.93	0.24		63.95	0.388393					64.03	0.12		63.72	0.26087
64.06	0.21		64.26	0.419643					63.95	0.186667		64.59	0.144928			64.22	0.215		64.14	0.370536					64.16	0.12		63.92	0.246377
64.31	0.2		64.45	0.419643					64.16	0.2		64.74	0.144928			64.38	0.215		64.35	0.379464					64.35	0.106667		64.16	0.231884
64.48	0.2		64.63	0.40625					64.32	0.173333		64.92	0.144928			64.43	0.21		64.5	0.379464					64.63	0.106667		64.39	0.246377
64.74	0.205		64.82	0.383929					64.62	0.2		65.16	0.130435			64.74	0.22		64.7	0.383929					64.8	0.106667		64.49	0.231884
64.93	0.2		65.01	0.397321					64.79	0.213333		65.37	0.144928			64.88	0.23		64.92	0.375					64.91	0.106667		64.76	0.231884
65.06	0.2		65.27	0.370536					64.95	0.2		65.54	0.144928			65.2	0.225		65.11	0.370536					65.17	0.0933333		65.01	0.231884
65.27	0.205		65.5	0.34375					65.11	0.226667		65.72	0.130435			65.33	0.22		65.32	0.348214					65.35	0.12		65.16	0.217391
65.57	0.21		65.7	0.339286					65.3	0.173333		65.9	0.144928			65.48	0.215		65.51	0.361607					65.59	0.133333		65.33	0.246377
65.67	0.195		65.82	0.330357					65.51	0.186667		66.09	0.144928			65.7	0.2		65.75	0.366071					65.75	0.106667		65.56	0.246377
65.96	0.195		66.05	0.321429					65.7	0.186667		66.31	0.130435			65.92	0.195		65.88	0.370536					65.96	0.106667		65.7	0.246377
66.06	0.2		66.27	0.325893					65.96	0.2		66.52	0.173913			66.15	0.19		66.13	0.339286					66.23	0.106667		65.93	0.246377
66.35	0.185		66.49	0.294643					66.17	0.186667		66.78	0.15942			66.25	0.205		66.25	0.330357					66.38	0.12		66.17	0.26087
66.54	0.205		66.62	0.276786					66.39	0.186667		66.9	0.144928			66.52	0.195		66.44	0.366071					66.56	0.106667		66.36	0.217391
66.57	0.205		66.9	0.272321					66.58	0.2		67.13	0.144928			66.63	0.195		66.68	0.361607					66.77	0.106667		66.57	0.231884
66.81	0.205		67.11	0.285714					66.76	0.2		67.38	0.130435			66.85	0.195		66.86	0.334821					66.99	0.106667		66.69	0.231884
67.1	0.21		67.27	0.28125					66.97	0.173333		67.56	0.15942			67.14	0.17		67.06	0.34375					67.21	0.12		66.94	0.217391
67.21	0.195		67.46	0.263393					67.11	0.213333		67.71	0.15942			67.27	0.165		67.35	0.339286					67.27	0.133333		67.09	0.217391
67.5	0.195		67.74	0.267857					67.3	0.213333		67.95	0.15942			67.42	0.165		67.48	0.352679					67.6	0.12		67.34	0.217391
67.59	0.195		67.85	0.254464					67.62	0.226667		68.1	0.173913			67.71	0.185		67.64	0.330357					67.79	0.12		67.52	0.202899
67.86	0.19		67.97	0.241071					67.83	0.186667		68.31	0.144928			67.86	0.18		67.88	0.361607					67.93	0.146667		67.7	0.246377
68.06	0.205		68.24	0.227679					68.1	0.2		68.6	0.173913			68.14	0.17		68.06	0.348214					68.1	0.12		67.93	0.217391
68.25	0.19		68.47	0.25					68.21	0.213333		68.74	0.15942			68.31	0.175		68.2	0.325893					68.31	0.12		68.12	0.188406
68.35	0.195		68.7	0.232143					68.42	0.2		68.99	0.15942			68.44	0.17		68.58	0.321429					68.55	0.12		68.31	0.217391
68.66	0.18		68.87	0.227679					68.62	0.213333		69.17	0.15942			68.7	0.17		68.68	0.325893					68.74	0.106667		68.52	0.202899
68.82	0.19		69.06	0.223214					68.82	0.2		69.4	0.130435			68.85	0.175		68.92	0.330357					68.89	0.133333		68.72	0.231884
69.02	0.195		69.27	0.209821					68.93	0.213333		69.54	0.115942			69.01	0.155		69.04	0.294643					69.23	0.12		68.89	0.217391
69.25	0.215		69.5	0.209821					69.25	0.213333		69.74	0.15942			69.42	0.17		69.33	0.3125					69.37	0.106667		69.12	0.202899
69.42	0.21		69.63	0.21875					69.42	0.2		69.9	0.144928			69.54	0.18		69.52	0.294643					69.52	0.133333		69.36	0.217391
69.62	0.195		69.87	0.205357					69.6	0.213333		70.06	0.15942			69.74	0.16		69.67	0.325893					69.75	0.133333		69.52	0.217391
69.81	0.19		70.09	0.205357					69.81	0.2		70.31	0.15942			69.95	0.16		69.91	0.3125					69.98	0.133333		69.74	0.231884
70.09	0.2		70.23	0.227679					69.99	0.226667		70.53	0.15942			70.12	0.155		70.06	0.299107					70.14	0.12		69.9	0.217391
70.22	0.18		70.44	0.200893					70.17	0.253333		70.69	0.144928			70.31	0.15		70.28	0.321429					70.35	0.133333		70.11	0.217391
70.45	0.18		70.65	0.1875					70.35	0.226667		70.86	0.15942			70.57	0.15		70.46	0.3125					70.57	0.12		70.26	0.217391
70.63	0.205		70.82	0.196429					70.45	0.24		71.07	0.173913			70.65	0.145		70.71	0.303571					70.81	0.146667		70.49	0.202899
70.99	0.21		71.06	0.1875					70.68	0.226667		71.29	0.173913			70.93	0.16		70.92	0.272321					70.88	0.146667		70.67	0.26087
71.19	0.205		71.22	0.174107					70.81	0.266667		71.58	0.144928			71.06	0.175		71.01	0.3125					71.12	0.146667		70.92	0.246377
71.31	0.22		71.44	0.178571					71.1	0.226667		71.71	0.15942			71.34	0.16		71.25	0.285714					71.37	0.146667		71.06	0.202899
71.53	0.2		71.61	0.160714					71.25	0.253333		71.92	0.173913			71.42	0.165		71.46	0.303571					71.52	0.16		71.34	0.231884
71.74	0.215		71.85	0.15625					71.52	0.253333		72.07	0.144928			71.65	0.17		71.67	0.303571					71.74	0.173333		71.5	0.217391
71.9	0.2		71.99	0.183036					71.63	0.253333		72.27	0.188406			71.88	0.14		71.91	0.28125					71.88	0.12		71.75	0.246377
72.17	0.205		72.28	0.183036					71.93	0.226667		72.51	0.173913			71.99	0.145		72.05	0.28125					72.1	0.12		71.91	0.202899
72.29	0.215		72.44	0.165179					72.01	0.28		72.7	0.188406			72.21	0.145		72.24	0.290179					72.34	0.173333		72.07	0.246377
72.48	0.23		72.54	0.151786					72.21	0.293333		72.89	0.173913			72.37	0.16		72.39	0.285714					72.52	0.186667		72.35	0.231884
72.7	0.21		72.81	0.165179					72.49	0.253333		73.13	0.15942			72.57	0.16		72.67	0.285714					72.73	0.146667		72.44	0.289855
72.89	0.195		73.03	0.160714					72.7	0.28		73.33	0.173913			72.75	0.165		72.87	0.303571					72.92	0.173333		72.72	0.246377
73.09	0.225		73.17	0.165179					72.87	0.28		73.42	0.15942			73.05	0.165		72.99	0.272321					73.16	0.186667		72.85	0.231884
73.31	0.23		73.44	0.160714					73.06	0.293333		73.69	0.202899			73.28	0.165		73.17	0.28125					73.31	0.173333		73.06	0.231884
73.52	0.215		73.68	0.165179					73.27	0.28		73.8	0.188406			73.41	0.17		73.38	0.290179					73.63	0.186667		73.31	0.202899
73.61	0.225		73.85	0.15625					73.49	0.24		74.07	0.188406			73.64	0.16		73.55	0.290179					73.71	0.16		73.46	0.202899
73.85	0.235		74.02	0.151786					73.71	0.28		74.31	0.173913			73.74	0.17		73.8	0.3125					73.99	0.173333		73.64	0.202899
74.02	0.225		74.19	0.147321					73.85	0.293333		74.52	0.217391			74.06	0.175		73.99	0.316964					74.08	0.2		73.93	0.231884
74.23	0.24		74.4	0.160714					74.02	0.306667		74.76	0.202899			74.2	0.175		74.19	0.28125					74.31	0.173333		74.04	0.217391
74.4	0.23		74.52	0.151786					74.35	0.293333		74.9	0.231884			74.45	0.18		74.4	0.290179					74.46	0.173333		74.31	0.246377
74.62	0.235		74.82	0.151786					74.44	0.306667		75.06	0.231884			74.59	0.185		74.67	0.285714					74.72	0.173333		74.43	0.246377
74.74	0.24		75.01	0.151786					74.64	0.293333		75.29	0.217391			74.85	0.19		74.81	0.290179					74.92	0.173333		74.61	0.231884
75.01	0.265		75.19	0.147321					74.88	0.306667		75.46	0.246377			75.06	0.17		75.03	0.303571					75.21	0.226667		74.85	0.26087
75.15	0.225		75.37	0.15625					75.07	0.293333		75.7	0.217391			75.24	0.18		75.26	0.290179					75.31	0.213333		75.06	0.246377
75.42	0.27		75.65	0.147321					75.26	0.306667		75.95	0.231884			75.38	0.19		75.38	0.321429					75.47	0.186667		75.26	0.246377
75.57	0.25		75.78	0.147321					75.49	0.293333		76.1	0.231884			75.67	0.19		75.57	0.294643					75.7	0.226667		75.47	0.26087
75.75	0.25		75.95	0.165179					75.68	0.28		76.24	0.202899			75.88	0.2		75.85	0.285714					75.87	0.226667		75.72	0.246377
75.95	0.255		76.15	0.142857					75.88	0.36		76.49	0.217391			76.06	0.205		75.95	0.28125					76.06	0.2		75.88	0.26087
76.15	0.27		76.42	0.151786					76.01	0.28		76.66	0.231884			76.27	0.185		76.24	0.299107					76.24	0.226667		76.1	0.275362
76.3	0.27		76.58	0.15625					76.3	0.36		76.92	0.231884			76.53	0.21		76.4	0.303571					76.59	0.226667		76.28	0.275362
76.63	0.275		76.79	0.15625					76.42	0.346667		77.12	0.246377			76.67	0.2		76.65	0.325893					76.81	0.24		76.5	0.231884
76.74	0.255		76.97	0.147321					76.65	0.373333		77.34	0.231884			76.89	0.23		76.88	0.339286					76.84	0.24		76.65	0.246377
77.02	0.3		77.23	0.15625					76.86	0.386667		77.51	0.231884			77.02	0.205		77.02	0.330357					77.02	0.266667		76.89	0.275362
77.1	0.28		77.39	0.151786					77.1	0.36		77.74	0.188406			77.29	0.225		77.21	0.361607					77.34	0.24		77.1	0.304348
77.42	0.295		77.57	0.151786					77.2	0.373333		77.9	0.26087			77.4	0.23		77.46	0.348214					77.51	0.253333		77.34	0.26087
77.64	0.29		77.88	0.169643					77.45	0.36		78.1	0.217391			77.65	0.235		77.65	0.330357					77.68	0.24		77.5	0.289855
77.69	0.31		78.02	0.151786					77.71	0.4		78.35	0.26087			77.92	0.25		77.84	0.34375					77.85	0.24		77.64	0.289855
									77.9	0.373333		78.49	0.26087			78.16	0.255		77.98						78.21	0.253333		77.8	0.275362
																	0
																	0
																	0
																	0
																	0

## Sheet: FR C. thermalis
S2QB-																						S2QA- (DCMU)
	Replicate 1			Replicate 2			Replicate 3			Replicate 4			Replicate 5			Replicate 6			Replicate 7				Replicate 1			Replicate 2			Replicate 3			Replicate 4			Replicate 5
-19.57	0.262136		-19.85	0.0233333		-19.42	0.0401003		1.63	0.293103		-19.76	0.175159		-19.77	0.128571		-19.79	0.115385			0.72	1.42241		-19.65	0.05		-19.81	0.197995		-19.83	0.207143		-19.83	0.276923
-19.65	0.213592		-19.97	0.03		-19.41	0.0426065		1.63	0.275862		-19.7	0.191083		-19.69	0.114286		-19.8	0.0923077			0.6	1.33621		-19.6	0.0566667		-19.9	0.203008		-19.83	0.2		-20.04	0.330769
-19.55	0.242718		-19.85	0.0233333		-19.39	0.0426065		1.7	0.293103		-19.76	0.175159		-19.73	0.135714		-19.79	0.107692			0.77	1.43966		-19.62	0.0533333		-19.88	0.213033		-19.74	0.214286		-19.88	0.307692
-19.64	0.23301		-19.9	0.0233333		-19.42	0.0426065		1.81	0.327586		-19.8	0.178344		-19.7	0.128571		-19.73	0.0923077			0.72	1.37931		-19.53	0.05		-19.9	0.200501		-19.79	0.207143		-19.8	0.292308
-19.55	0.194175		-19.88	0.0266667		-19.37	0.0451128		1.82	0.318966		-19.69	0.175159		-19.57	0.128571		-19.79	0.0923077			0.75	1.43103		-19.55	0.0566667		-19.85	0.192982		-19.76	0.207143		-19.81	0.3
-19.57	0.223301		-19.85	0.0233333		-19.28	0.0501253		1.68	0.310345		-19.83	0.178344		-19.56	0.128571		-19.56	0.115385			0.81	1.37931		-19.62	0.0533333		-19.89	0.205514		-19.77	0.228571		-19.87	0.3
-19.45	0.242718		-19.87	0.0266667		-19.36	0.0401003		1.52	0.310345		-19.74	0.181529		-19.47	0.135714		-19.53	0.107692			0.72	1.39655		-19.47	0.0566667		-19.83	0.197995		-19.77	0.185714		-19.76	0.315385
-19.45	0.242718		-19.83	0.0266667		-19.3	0.0426065		1.8	0.275862		-19.83	0.16242		-19.47	0.121429		-19.57	0.0923077			0.84	1.39655		-19.47	0.0466667		-19.74	0.200501		-19.62	0.221429		-19.69	0.3
-19.4	0.252427		-19.81	0.02		-19.23	0.047619		1.6	0.267241		-19.72	0.165605		-19.3	0.114286		-19.35	0.0846154			0.7	1.38793		-19.41	0.05		-19.74	0.223058		-19.72	0.2		-19.73	0.307692
-19.37	0.252427		-19.73	0.02		-19.15	0.0451128		1.57	0.284483		-19.48	0.181529		-19.14	0.135714		-19.68	0.1			0.84	1.42241		-19.3	0.0566667		-19.76	0.205514		-19.53	0.214286		-19.55	0.323077
-19.23	0.223301		-19.69	0.02		-19.09	0.0426065		1.72	0.275862		-19.4	0.16242		-19.01	0.135714		-19.69	0.1			0.86	1.34483		-19.23	0.05		-19.62	0.210526		-19.58	0.192857		-19.53	0.292308
-19.19	0.223301		-19.57	0.02		-18.97	0.0426065		1.67	0.267241		-19.26	0.171975		-18.95	0.135714		-19.22	0.107692			1.02	1.33621		-19.02	0.06		-19.55	0.190476		-19.39	0.2		-19.36	0.315385
-19.02	0.242718		-19.48	0.0233333		-18.88	0.0401003		1.86	0.267241		-19.03	0.171975		-18.61	0.128571		-18.91	0.1			1.13	1.39655		-18.94	0.06		-19.36	0.203008		-19.32	0.207143		-19.09	0.323077
-18.84	0.23301		-19.37	0.0266667		-18.71	0.0451128		1.84	0.267241		-18.94	0.171975		-18.49	0.135714		-18.7	0.107692			1.24	1.37069		-18.76	0.0533333		-19.24	0.203008		-19.16	0.221429		-18.88	0.315385
-18.76	0.223301		-19.26	0.0233333		-18.5	0.0501253		1.99	0.301724		-18.64	0.16879		-18.32	0.121429		-18.55	0.0923077			1.45	1.37931		-18.51	0.0566667		-19.14	0.200501		-19.02	0.228571		-18.57	0.323077
-18.5	0.242718		-19.12	0.0233333		-18.4	0.0401003		1.96	0.258621		-18.55	0.171975		-17.98	0.121429		-18.51	0.107692			1.66	1.35345		-18.4	0.0633333		-18.9	0.218045		-18.83	0.228571		-18.64	0.315385
-18.37	0.262136		-19.03	0.03		-18.13	0.0426065		2.35	0.301724		-18.37	0.181529		-17.84	0.135714		-18.19	0.123077			1.67	1.37069		-18.15	0.06		-18.69	0.210526		-18.6	0.207143		-18.29	0.307692
-18.15	0.23301		-18.74	0.0233333		-17.96	0.0451128		2.33	0.267241		-18.08	0.175159		-17.62	0.121429		-18.37	0.1			1.9	1.43966		-17.92	0.0566667		-18.49	0.213033		-18.44	0.214286		-18.17	0.323077
-17.88	0.252427		-18.61	0.0233333		-17.77	0.0426065		2.5	0.284483		-17.9	0.191083		-17.44	0.128571		-17.8	0.1			2.24	1.34483		-17.66	0.06		-18.32	0.225564		-18.15	0.214286		-17.87	0.323077
-17.5	0.271845		-18.38	0.0266667		-17.5	0.0451128		2.68	0.284483		-17.69	0.184713		-17.23	0.157143		-17.73	0.107692			2.21	1.47414		-17.38	0.0666667		-18.04	0.215539		-18.13	0.221429		-17.55	0.353846
-17.36	0.300971		-18.21	0.0266667		-17.24	0.0576441		2.91	0.275862		-17.53	0.178344		-16.94	0.142857		-17.59	0.123077			2.63	1.5		-17.16	0.0666667		-17.69	0.225564		-17.79	0.235714		-17.34	0.330769
-17.08	0.281553		-17.95	0.0266667		-16.96	0.0526316		3.06	0.275862		-17.26	0.187898		-16.72	0.142857		-17.61	0.1			2.92	1.47414		-16.87	0.0666667		-17.51	0.230576		-17.48	0.242857		-17.12	0.361538
-16.77	0.281553		-17.71	0.0266667		-16.75	0.0501253		3.41	0.293103		-17.06	0.184713		-16.48	0.15		-16.83	0.107692			3.08	1.43966		-16.68	0.0766667		-17.24	0.245614		-17.23	0.221429		-16.98	0.369231
-16.48	0.281553		-17.42	0.03		-16.46	0.047619		3.57	0.284483		-16.85	0.171975		-16.21	0.15		-16.97	0.123077			3.4	1.49138		-16.26	0.08		-17.02	0.260652		-17.1	0.25		-16.62	0.330769
-16.18	0.262136		-17.1	0.03		-16.17	0.0501253		3.82	0.318966		-16.58	0.181529		-16.1	0.128571		-16.85	0.107692			3.52	1.58621		-16.06	0.0733333		-16.65	0.245614		-16.87	0.242857		-16.58	0.330769
-16.08	0.31068		-16.9	0.03		-15.93	0.0526316		4.1	0.301724		-16.37	0.187898		-15.79	0.15		-16.15	0.123077			3.84	1.60345		-15.8	0.0733333		-16.46	0.24812		-16.6	0.257143		-16.15	0.376923
-15.85	0.320388		-16.67	0.03		-15.65	0.0576441		4.44	0.293103		-16.26	0.203822		-15.59	0.15		-16.48	0.107692			4.21	1.55172		-15.48	0.0766667		-16.21	0.273183		-16.27	0.257143		-16.02	0.338462
-15.55	0.320388		-16.43	0.0366667		-15.32	0.0576441		4.62	0.284483		-15.9	0.197452		-15.34	0.157143		-16.08	0.1			4.27	1.57759		-15.28	0.0866667		-15.9	0.26817		-16.04	0.257143		-15.75	0.392308
-15.26	0.349515		-16.12	0.0333333		-15.04	0.0451128		5.04	0.293103		-15.77	0.216561		-15.23	0.164286		-15.54	0.130769			4.49	1.62069		-15.05	0.0833333		-15.58	0.283208		-15.9	0.264286		-15.62	0.376923
-15.05	0.349515		-15.83	0.0333333		-14.8	0.0576441		5.02	0.310345		-15.51	0.200637		-14.96	0.164286		-15.73	0.123077			4.97	1.65517		-14.7	0.0933333		-15.33	0.270677		-15.65	0.278571		-15.4	0.4
-14.69	0.330097		-15.4	0.04		-14.52	0.0626566		5.48	0.344828		-15.33	0.213376		-14.8	0.171429		-15.13	0.138462			5.17	1.68103		-14.47	0.0833333		-15.11	0.285714		-15.26	0.271429		-15.2	0.392308
-14.28	0.339806		-15.24	0.0366667		-14.32	0.0551378		5.56	0.318966		-15.11	0.229299		-14.52	0.164286		-15.32	0.130769			5.29	1.7069		-14.27	0.09		-14.84	0.288221		-15.21	0.264286		-14.8	0.423077
-14.12	0.339806		-14.9	0.04		-13.98	0.0651629		5.99	0.344828		-14.92	0.219745		-14.31	0.164286		-15.01	0.130769			5.58	1.75		-14.02	0.0933333		-14.62	0.305764		-15.07	0.292857		-14.72	0.423077
-13.9	0.359223		-14.72	0.0433333		-13.76	0.0601504		6.27	0.336207		-14.65	0.197452		-14.15	0.178571		-14.52	0.123077			5.85	1.67241		-13.8	0.09		-14.39	0.298246		-14.82	0.271429		-14.6	0.407692
-13.65	0.349515		-14.41	0.0366667		-13.57	0.0601504		6.42	0.318966		-14.48	0.210191		-13.79	0.178571		-14.28	0.138462			6.13	1.76724		-13.54	0.0966667		-14.08	0.310777		-14.55	0.285714		-14.36	0.423077
-13.45	0.368932		-14.19	0.04		-13.3	0.0601504		6.7	0.336207		-14.33	0.229299		-13.69	0.221429		-14.35	0.146154			6.68	1.75		-13.37	0.103333		-13.94	0.318296		-14.24	0.307143		-14.1	0.430769
-13.2	0.378641		-14.02	0.0433333		-13.1	0.0626566		6.91	0.353448		-14.18	0.219745		-13.44	0.192857		-13.69	0.138462			6.66	1.81034		-13.19	0.11		-13.69	0.343358		-14.06	0.314286		-14.1	0.446154
-13.05	0.398058		-13.73	0.0466667		-12.93	0.0576441		7.37	0.37069		-13.96	0.226115		-13.28	0.207143		-13.83	0.138462			7.17	1.82759		-12.93	0.106667		-13.49	0.340852		-13.87	0.292857		-13.8	0.438462
-12.86	0.38835		-13.49	0.0466667		-12.67	0.0651629		7.49	0.336207		-13.75	0.219745		-13.18	0.192857		-13.26	0.146154			7.06	1.82759		-12.76	0.106667		-13.26	0.333333		-13.67	0.321429		-13.53	0.469231
-12.77	0.456311		-13.26	0.0433333		-12.48	0.0676692		7.64	0.37931		-13.55	0.235669		-12.86	0.2		-13.57	0.153846			7.27	1.96552		-12.6	0.12		-13.11	0.365915		-13.5	0.292857		-13.24	0.430769
-12.44	0.427184		-13.02	0.0433333		-12.23	0.0726817		7.83	0.353448		-13.32	0.248408		-12.75	0.192857		-12.79	0.146154			7.73	1.88793		-12.37	0.116667		-12.89	0.368421		-13.26	0.342857		-13.3	0.469231
-12.23	0.456311		-12.81	0.0466667		-12.12	0.075188		8.04	0.362069		-13.12	0.248408		-12.42	0.214286		-12.65	0.146154			7.77	1.93103		-12.19	0.116667		-12.76	0.37594		-13.07	0.328571		-12.95	0.453846
-12.09	0.456311		-12.69	0.0533333		-11.91	0.0726817		8.21	0.37069		-12.91	0.235669		-12.23	0.207143		-12.87	0.176923			7.99	2.06034		-12.05	0.126667		-12.56	0.373434		-12.98	0.328571		-12.8	0.5
-11.9	0.456311		-12.5	0.06		-11.7	0.0701754		8.45	0.396552		-12.73	0.257962		-12.01	0.192857		-12.6	0.161538			8.09	2.0431		-11.87	0.13		-12.32	0.380952		-12.64	0.342857		-12.59	0.469231
-11.74	0.456311		-12.25	0.05		-11.6	0.0726817		8.6	0.37069		-12.56	0.257962		-11.8	0.2		-12.58	0.169231			8.26	1.94828		-11.68	0.123333		-12.23	0.390977		-12.44	0.35		-12.4	0.484615
-11.4	0.436893		-12.05	0.0533333		-11.46	0.075188		8.82	0.362069		-12.23	0.261146		-11.63	0.2		-12.15	0.146154			8.46	2.00862		-11.52	0.12		-11.98	0.406015		-12.21	0.357143		-12.11	0.507692
-11.42	0.456311		-11.9	0.0633333		-11.2	0.0701754		8.97	0.413793		-12.21	0.270701		-11.5	0.221429		-12.11	0.146154			8.6	2.06034		-11.33	0.123333		-11.81	0.408521		-12.12	0.357143		-11.97	0.461538
-11.25	0.485437		-11.7	0.0566667		-11.1	0.0776942		9.2	0.396552		-11.89	0.264331		-11.25	0.235714		-11.99	0.161538			8.8	2.06034		-11.16	0.13		-11.69	0.418546		-11.99	0.357143		-11.76	0.5
-11.06	0.495146		-11.58	0.0566667		-10.9	0.075188		9.36	0.413793		-11.72	0.27707		-11.1	0.228571		-11.5	0.146154			9.07	2.06034		-11.03	0.136667		-11.48	0.43609		-11.8	0.378571		-11.65	0.515385
-10.72	0.485437		-11.48	0.0666667		-10.73	0.0776942		9.67	0.396552		-11.48	0.261146		-10.87	0.221429		-11.51	0.161538			9.06	2.15517		-10.77	0.136667		-11.3	0.443609		-11.51	0.35		-11.32	0.484615
-10.55	0.553398		-11.23	0.0533333		-10.55	0.0877193		9.74	0.413793		-11.26	0.296178		-10.67	0.242857		-11.36	0.169231			9.24	2.12069		-10.65	0.14		-11.12	0.45614		-11.37	0.428571		-11.25	0.530769
-10.42	0.563107		-11.16	0.07		-10.41	0.075188		9.98	0.37931		-11.11	0.286624		-10.48	0.228571		-11.14	0.169231			9.52	2.21552		-10.44	0.156667		-10.87	0.446115		-11.21	0.414286		-11.05	0.530769
-10.22	0.514563		-10.94	0.07		-10.2	0.0802005		10.07	0.439655		-10.94	0.292994		-10.27	0.221429		-10.69	0.161538			9.63	2.18966		-10.3	0.143333		-10.83	0.448622		-11.01	0.371429		-10.72	0.538462
-10.05	0.563107		-10.76	0.0633333		-9.98	0.0802005		10.35	0.413793		-10.81	0.299363		-10.05	0.242857		-10.48	0.153846			9.9	2.24138		-10.06	0.153333		-10.52	0.45614		-10.89	0.4		-10.5	0.553846
-9.85	0.533981		-10.51	0.0766667		-9.8	0.085213		10.51	0.413793		-10.45	0.318471		-9.96	0.228571		-10.33	0.153846			10.17	2.25862		-9.88	0.143333		-10.44	0.463659		-10.69	0.407143		-10.4	0.546154
-9.76	0.543689		-10.44	0.07		-9.69	0.0927318		10.64	0.405172		-10.26	0.308917		-9.67	0.228571		-10.12	0.153846			10.38	2.27586		-9.7	0.153333		-10.22	0.473684		-10.46	0.407143		-10.22	0.546154
-9.56	0.553398		-10.26	0.07		-9.47	0.0952381		10.81	0.413793		-10.15	0.312102		-9.52	0.257143		-9.59	0.176923			10.47	2.30172		-9.47	0.16		-10.04	0.496241		-10.12	0.407143		-9.89	0.546154
-9.34	0.563107		-10.08	0.0666667		-9.26	0.0902256		11.14	0.439655		-9.94	0.296178		-9.34	0.235714		-9.88	0.184615			10.78	2.24138		-9.35	0.166667		-9.82	0.491228		-9.98	0.407143		-9.82	0.576923
-9.17	0.621359		-9.84	0.0666667		-9.11	0.0902256		11.19	0.448276		-9.8	0.321656		-9.19	0.25		-9.26	0.169231			10.85	2.28448		-9.09	0.166667		-9.65	0.498747		-9.82	0.407143		-9.51	0.538462
-9.01	0.601942		-9.78	0.0766667		-8.91	0.0977444		11.44	0.439655		-9.52	0.308917		-9.01	0.25		-9.35	0.176923			10.83	2.39655		-8.93	0.166667		-9.4	0.521303		-9.56	0.435714		-9.4	0.592308
-8.76	0.582524		-9.49	0.07		-8.69	0.100251		11.51	0.448276		-9.25	0.321656		-8.67	0.257143		-9.15	0.161538			11.08	2.40517		-8.77	0.173333		-9.29	0.516291		-9.37	0.442857		-9.21	0.6
-8.55	0.601942		-9.34	0.0733333		-8.53	0.100251		11.8	0.439655		-9.03	0.33758		-8.59	0.25		-8.73	0.169231			11.38	2.35345		-8.54	0.173333		-9.07	0.541353		-9.25	0.485714		-8.97	0.646154
-8.46	0.61165		-9.12	0.0766667		-8.28	0.0927318		11.99	0.456897		-8.81	0.334395		-8.3	0.257143		-8.58	0.169231			11.67	2.40517		-8.33	0.176667		-8.81	0.558897		-9.07	0.464286		-8.71	0.592308
-8.26	0.650485		-8.93	0.0833333		-8.13	0.0952381		12.27	0.448276		-8.65	0.356688		-8.12	0.235714		-8.51	0.176923			11.8	2.50862		-8.09	0.183333		-8.62	0.52381		-8.91	0.45		-8.71	0.607692
-7.98	0.621359		-8.71	0.08		-7.87	0.102757		12.37	0.431034		-8.44	0.350318		-7.94	0.25		-8.08	0.176923			12.11	2.5431		-7.94	0.2		-8.51	0.566416		-8.61	0.457143		-8.28	0.553846
-7.8	0.669903		-8.48	0.08		-7.69	0.0977444		12.55	0.482759		-8.22	0.356688		-7.73	0.271429		-8.3	0.184615			12.28	2.57759		-7.73	0.176667		-8.26	0.581454		-8.41	0.471429		-8.05	0.576923
-7.58	0.61165		-8.28	0.0766667		-7.52	0.110276		12.84	0.5		-8.01	0.347134		-7.51	0.278571		-7.98	0.192308			12.46	2.55172		-7.51	0.186667		-8.05	0.576441		-8.24	0.464286		-7.84	0.607692
-7.36	0.650485		-8.2	0.0833333		-7.26	0.100251		13.06	0.482759		-7.82	0.347134		-7.24	0.25		-7.78	0.207692			12.72	2.61207		-7.28	0.18		-7.86	0.593985		-7.88	0.471429		-7.69	0.607692
-7.15	0.68932		-7.9	0.09		-6.98	0.105263		13.29	0.525862		-7.68	0.363057		-7.15	0.285714		-7.32	0.176923			13.03	2.74138		-7.02	0.186667		-7.65	0.561404		-7.78	0.514286		-7.45	0.592308
-6.9	0.679612		-7.73	0.09		-6.77	0.107769		13.38	0.456897		-7.56	0.369427		-6.85	0.257143		-7.51	0.2			13.1	2.62931		-6.9	0.206667		-7.41	0.614035		-7.6	0.485714		-7.3	0.638462
-6.8	0.699029		-7.51	0.0966667		-6.62	0.105263		13.72	0.482759		-7.3	0.350318		-6.76	0.25		-6.9	0.176923			13.42	2.68966		-6.69	0.206667		-7.24	0.609023		-7.32	0.492857		-7.08	0.615385
-6.6	0.728155		-7.28	0.0966667		-6.33	0.112782		13.77	0.5		-7.08	0.353503		-6.4	0.271429		-7.04	0.192308			13.57	2.75		-6.46	0.193333		-6.98	0.62406		-7.08	0.5		-6.83	0.607692
-6.44	0.699029		-7.04	0.0866667		-6.22	0.110276		14.02	0.5		-6.85	0.375796		-6.24	0.264286		-6.76	0.192308			13.77	2.77586		-6.27	0.216667		-6.8	0.62406		-6.92	0.557143		-6.8	0.623077
-6.28	0.718447		-6.85	0.09		-5.96	0.112782		14.3	0.517241		-6.65	0.366242		-6.14	0.271429		-6.4	0.207692			14.13	2.80172		-6.05	0.223333		-6.55	0.641604		-6.76	0.507143		-6.48	0.669231
-5.86	0.76699		-6.62	0.1		-5.8	0.117794		14.43	0.525862		-6.44	0.382166		-5.85	0.271429		-6.48	0.192308			14.2	2.90517		-5.86	0.223333		-6.4	0.649123		-6.6	0.55		-6.31	0.607692
-5.67	0.728155		-6.44	0.0966667		-5.46	0.107769		14.7	0.560345		-6.28	0.388535		-5.72	0.278571		-6.05	0.169231			14.45	2.91379		-5.63	0.226667		-6.14	0.639098		-6.33	0.542857		-6.19	0.630769
-5.59	0.699029		-6.27	0.0966667		-5.39	0.107769		14.91	0.534483		-6.1	0.394904		-5.46	0.257143		-5.94	0.176923			14.63	2.83621		-5.45	0.226667		-5.98	0.676692		-6.3	0.55		-5.85	0.638462
-5.4	0.728155		-6.08	0.0966667		-5.21	0.130326		15.06	0.568966		-5.85	0.382166		-5.23	0.271429		-5.65	0.184615			14.73	2.89655		-5.26	0.216667		-5.76	0.686717		-5.9	0.528571		-5.74	0.669231
-5.17	0.786408		-5.9	0.0966667		-4.94	0.117794		15.31	0.543103		-5.76	0.407643		-5.05	0.25		-5.73	0.192308			15.17	2.90517		-5.01	0.233333		-5.54	0.694236		-5.67	0.585714		-5.49	0.684615
-4.94	0.825243		-5.58	0.103333		-4.77	0.122807		15.49	0.560345		-5.33	0.394904		-4.87	0.257143		-5.45	0.207692			15.31	3.02586		-4.77	0.233333		-5.29	0.671679		-5.67	0.571429		-5.48	0.6
-4.69	0.76699		-5.39	0.106667		-4.55	0.107769		15.66	0.577586		-5.27	0.410828		-4.59	0.264286		-5.26	0.192308			15.47	2.97414		-4.59	0.233333		-5.17	0.691729		-5.37	0.564286		-5.15	0.623077
-4.43	0.796117		-5.25	0.0966667		-4.34	0.122807		15.88	0.62069		-5.15	0.410828		-4.48	0.264286		-4.77	0.192308			15.75	2.99138		-4.35	0.23		-4.98	0.699248		-5.23	0.578571		-5.03	0.584615
-4.26	0.76699		-5.03	0.103333		-4.14	0.115288		16.17	0.568966		-4.9	0.407643		-4.16	0.264286		-4.67	0.176923			15.85	3.06897		-4.2	0.23		-4.76	0.704261		-4.89	0.571429		-4.67	0.615385
-4.04	0.815534		-4.77	0.113333		-3.98	0.115288		16.29	0.551724		-4.79	0.404459		-4.1	0.25		-4.63	0.176923			16.07	3.15517		-3.98	0.256667		-4.57	0.724311		-4.73	0.592857		-4.57	0.615385
-3.82	0.76699		-4.54	0.1		-3.76	0.112782		16.57	0.577586		-4.55	0.420382		-3.82	0.235714		-4.5	0.184615			16.24	3.13793		-3.81	0.25		-4.37	0.736842		-4.58	0.578571		-4.48	0.592308
-3.69	0.776699		-4.4	0.106667		-3.63	0.137845		16.74	0.568966		-4.33	0.398089		-3.74	0.264286		-4.15	0.2			16.33	3.14655		-3.55	0.246667		-4.1	0.711779		-4.39	0.614286		-4.16	0.684615
-3.41	0.776699		-4.08	0.11		-3.44	0.125313		16.95	0.646552		-4.14	0.426752		-3.47	0.271429		-4.02	0.176923			16.5	3.12069		-3.35	0.25		-3.91	0.724311		-4.08	0.635714		-4.05	0.653846
-3.14	0.786408		-3.98	0.116667		-3.12	0.122807		17.06	0.612069		-3.96	0.429936		-3.3	0.278571		-3.69	0.161538			16.63	3.13793		-3.15	0.263333		-3.73	0.736842		-4.04	0.6		-3.63	0.669231
-2.96	0.776699		-3.63	0.116667		-2.96	0.120301		17.37	0.594828		-3.67	0.423567		-3.1	0.271429		-3.35	0.161538			17.02	3.22414		-2.96	0.256667		-3.48	0.73183		-3.62	0.607143		-3.53	0.676923
-2.84	0.805825		-3.54	0.12		-2.78	0.130326		17.52	0.62069		-3.53	0.414013		-2.9	0.278571		-3.51	0.169231			17.37	3.21552		-2.77	0.246667		-3.35	0.766917		-3.41	0.657143		-3.37	0.684615
-2.59	0.834951		-3.31	0.11		-2.62	0.12782		17.74	0.62931		-3.29	0.426752		-2.76	0.3		-3.26	0.169231			17.39	3.21552		-2.6	0.266667		-3.11	0.746867		-3.17	0.621429		-3.16	0.723077
-2.31	0.825243		-3.12	0.12		-2.35	0.132832		17.92	0.637931		-3.11	0.442675		-2.37	0.307143		-2.9	0.176923			17.44	3.2931		-2.37	0.276667		-2.88	0.776942		-3.06	0.635714		-2.88	0.753846
-2.23	0.84466		-2.92	0.13		-2.15	0.135338		18.17	0.663793		-2.9	0.452229		-2.15	0.3		-2.83	0.207692			17.79	3.31897		-2.19	0.266667		-2.69	0.802005		-2.9	0.657143		-2.69	0.769231
-1.98	0.854369		-2.73	0.12		-1.91	0.125313		18.44	0.672414		-2.54	0.44586		-1.93	0.328571		-2.6	0.192308			18.06	3.28448		-1.98	0.283333		-2.48	0.781955		-2.58	0.664286		-2.48	0.730769
-1.8	0.912621		-2.5	0.123333		-1.83	0.12782		18.61	0.655172		-2.49	0.471338		-1.76	0.35		-2.37	0.215385			18.11	3.30172		-1.73	0.283333		-2.29	0.786967		-2.55	0.735714		-2.26	0.792308
-1.58	0.873786		-2.33	0.12		-1.58	0.130326		18.77	0.655172		-2.23	0.474522		-1.5	0.357143		-2.05	0.184615			18.51	3.41379		-1.58	0.293333		-2.11	0.802005		-2.21	0.735714		-2.25	0.846154
-1.39	0.864078		-2.11	0.123333		-1.33	0.132832		18.94	0.681034		-2.08	0.458599		-1.41	0.342857		-1.9	0.2			18.5	3.43103		-1.35	0.29		-1.96	0.829574		-2.11	0.742857		-1.82	0.861538
-1.27	0.932039		-2	0.126667		-1.2	0.140351		19.13	0.655172		-1.87	0.468153		-1.14	0.371429		-1.7	0.2			18.84	3.55172		-1.14	0.3		-1.65	0.817043		-1.86	0.764286		-1.59	0.838462
-0.96	0.864078		-1.72	0.136667		-0.96	0.145363		19.38	0.681034		-1.67	0.474522		-0.94	0.371429		-1.48	0.215385			19	3.41379		-0.99	0.28		-1.53	0.839599		-1.78	0.8		-1.46	0.846154
-0.87	0.941748		-1.58	0.133333		-0.72	0.135338		19.63	0.724138		-1.46	0.484076		-0.82	0.4		-1.37	0.215385			19.24	3.5431		-0.78	0.3		-1.29	0.807018		-1.53	0.828571		-1.35	0.915385
-0.68	0.902913		-1.31	0.133333		-0.56	0.137845		19.68	0.706897		-1.25	0.480892		-0.6	0.407143		-1.22	0.223077			19.45	3.52586		-0.58	0.293333		-1.06	0.839599		-1.25	0.842857		-1.2	0.861538
-0.4	0.92233		-1.2	0.143333		-0.37	0.140351		19.97	0.741379		-1.08	0.480892		-0.48	0.378571		-1.02	0.230769			19.63	3.56034		-0.37	0.31		-0.88	0.862155		-1.05	0.885714		-0.8	0.915385
-0.13	0.902913		-0.98	0.13		-0.19	0.132832		20.11	0.724138		-0.83	0.487261		-0.08	0.392857		-0.77	0.246154			19.99	3.5431		-0.17	0.313333		-0.73	0.842105		-0.95	0.9		-0.77	0.946154
0.02	0.912621		-0.75	0.143333		0.07	0.140351		20.37	0.715517		-0.66	0.5		0.12	0.442857		-0.61	0.230769			20.14	3.62069		0	0.293333		-0.52	0.874687		-0.72	0.885714		-0.55	1
0.13	0.951456		-0.53	0.143333		0.32	0.140351		20.58	0.775862		-0.46	0.506369		0.12	0.45		-0.41	0.246154			20.2	3.61207		0.24	0.326667		-0.26	0.857143		-0.44	0.957143		-0.42	1.01538
0.32	0.951456		-0.4	0.16		0.42	0.155388		20.81	0.732759		-0.23	0.493631		0.32	0.421429		-0.22	0.238462			20.35	3.55172		0.39	0.333333		-0.15	0.892231		-0.21	0.95		-0.07	1.04615
0.56	0.980583		-0.21	0.146667		0.69	0.145363		21.01	0.75		-0.07	0.503185		0.55	0.442857		0.23	0.238462			20.68	3.61207		0.6	0.34		-0.01	0.877193		-0.15	0.978571		0.02	1.01538
0.77	0.951456		-0.03	0.156667		0.88	0.150376		21.14	0.801724		0.11	0.531847		0.63	0.442857		0.45	0.230769			20.82	3.77586		0.85	0.34		0.27	0.897243		-0.02	1.05714		0.31	1.1
1.05	0.951456		0.28	0.163333		1.1	0.152882		21.45	0.775862		0.33	0.525478		0.86	0.45		0.61	0.261538			20.92	3.62931		1.04	0.323333		0.39	0.892231		0.29	1.07857		0.51	1.03846
1.25	0.990291		0.47	0.16		1.24	0.152882		21.48	0.844828		0.53	0.519108		1.18	0.464286		0.75	0.246154			21.3	3.65517		1.2	0.336667		0.63	0.897243		0.47	1.09286		0.53	1.03846
1.45	1.02913		0.61	0.146667		1.51	0.16792		21.87	0.775862		0.88	0.544586		1.35	0.478571		1	0.246154			21.52	3.77586		1.45	0.34		0.85	0.944862		0.65	1.07857		0.92	1.11538
1.57	1		0.84	0.16		1.77	0.155388		21.92	0.801724		1.08	0.541401		1.61	0.457143		1.2	0.253846			21.59	3.69828		1.66	0.336667		1.06	0.964912		0.9	1.10714		0.99	1.07692
1.78	1		1.05	0.156667		1.92	0.150376		22.11	0.793103		1.19	0.522293		1.74	0.485714		1.47	0.246154			21.95	3.76724		1.88	0.34		1.27	0.924812		1	1.2		1.28	1.17692
1.96	1.05825		1.31	0.17		2.17	0.150376		22.38	0.75		1.48	0.519108		2.01	0.521429		1.51	0.261538			21.91	3.81034		2.04	0.35		1.47	0.957393		1.24	1.19286		1.51	1.18462
2.21	1		1.6	0.173333		2.34	0.162907		22.55	0.793103		1.62	0.531847		2.17	0.485714		1.82	0.261538			22.31	3.75		2.29	0.356667		1.71	0.964912		1.33	1.27143		1.66	1.14615
2.52	1.04854		1.68	0.173333		2.56	0.152882		22.77	0.844828		1.85	0.544586		2.46	0.521429		1.97	0.261538			22.49	3.78448		2.5	0.353333		1.86	0.977444		1.62	1.26429		1.91	1.23846
2.72	1.01942		1.85	0.166667		2.72	0.157895		23.05	0.87069		1.99	0.56051		2.63	0.478571		2.13	0.269231			22.64	3.85345		2.7	0.356667		2.13	0.962406		1.91	1.26429		2.13	1.18462
2.91	1.08738		2.11	0.163333		2.95	0.157895		23.13	0.87069		2.27	0.547771		2.85	0.514286		2.37	0.292308			22.91	3.85345		2.95	0.383333		2.34	0.97995		2.09	1.3		2.33	1.23077
3.08	1.03883		2.31	0.166667		3.24	0.150376		23.35	0.862069		2.43	0.544586		3.03	0.514286		2.54	0.292308			23.13	3.81034		3.08	0.39		2.45	0.97995		2.29	1.34286		2.56	1.25385
3.16	1.05825		2.63	0.183333		3.4	0.165414		23.65	0.887931		2.67	0.550955		3.2	0.564286		2.63	0.292308			23.33	3.93966		3.36	0.376667		2.72	1.02005		2.58	1.42143		2.88	1.26923
3.47	1.05825		2.73	0.193333		3.61	0.162907		23.78	0.87931		2.82	0.547771		3.43	0.535714		2.85	0.284615			23.43	3.87931		3.55	0.37		2.99	1.01003		2.66	1.4		2.95	1.31538
3.51	1.07767		2.95	0.183333		3.82	0.172932		23.92	0.87931		2.97	0.522293		3.6	0.535714		3.27	0.292308			23.48	3.97414		3.72	0.38		3.24	1.01253		2.95	1.45714		3.24	1.36154
3.84	1.02913		3.27	0.176667		4.02	0.162907		24.17	0.862069		3.27	0.547771		3.72	0.578571		3.28	0.253846			23.74	3.87931		3.97	0.39		3.43	1.04762		3.07	1.48571		3.35	1.35385
4.05	1.04854		3.41	0.183333		4.2	0.157895		24.35	0.87069		3.45	0.541401		4	0.6		3.49	0.261538			24.17	3.93966		4.17	0.386667		3.67	1.05764		3.34	1.42857		3.7	1.36154
4.27	0.990291		3.61	0.196667		4.42	0.170426		24.57	0.87931		3.63	0.550955		4.21	0.592857		4.05	0.307692			24.32	3.86207		4.37	0.396667		3.81	1.06516		3.66	1.57857		3.84	1.38462
4.6	1.04854		3.78	0.21		4.62	0.172932		24.67	0.939655		3.78	0.538217		4.42	0.607143		3.86	0.284615			24.48	3.93966		4.56	0.396667		4	1.06266		3.77	1.64286		3.99	1.45385
4.69	1.03883		4.01	0.186667		4.93	0.182957		25.02	0.939655		4.05	0.525478		4.58	0.592857		4.21	0.284615			24.68	3.93966		4.77	0.4		4.27	1.06266		3.88	1.62143		4.21	1.46154
4.85	1.05825		4.23	0.196667		5.04	0.172932		25.2	0.991379		4.21	0.547771		4.87	0.592857		4.35	0.307692			24.77	3.93103		4.98	0.416667		4.46	1.08521		4.21	1.61429		4.45	1.44615
5.13	1.13592		4.52	0.21		5.23	0.177945		25.49	1		4.45	0.550955		4.98	0.6		4.75	0.315385			25.13	3.93103		5.17	0.4		4.6	1.10526		4.33	1.72857		4.54	1.51538
5.31	1.02913		4.59	0.21		5.35	0.172932		25.59	0.931034		4.56	0.566879		5.24	0.621429		4.77	0.3			25.27	3.87069		5.38	0.413333		4.91	1.11028		4.59	1.76429		4.77	1.48462
5.58	1.07767		4.83	0.203333		5.62	0.177945		25.74	0.965517		4.79	0.550955		5.44	0.628571		4.94	0.315385			25.51	3.92241		5.54	0.416667		5.06	1.13033		4.77	1.74286		4.99	1.50769
5.74	1.02913		5.06	0.226667		5.83	0.197995		26.1	0.991379		4.98	0.576433		5.68	0.628571		4.99	0.3			25.63	3.97414		5.72	0.42		5.25	1.13283		4.97	1.75		5.16	1.52308
5.89	1.07767		5.29	0.21		5.98	0.197995		26.2	1.05172		5.19	0.589172		5.85	0.635714		5.52	0.3			25.89	3.93103		5.92	0.423333		5.5	1.12782		5.29	1.84286		5.31	1.53846
6.1	1.04854		5.43	0.22		6.16	0.185464		26.45	1.00862		5.35	0.605096		6.02	0.657143		5.29	0.315385			26.17	4.03448		6.12	0.423333		5.69	1.1203		5.43	1.83571		5.6	1.53077
6.23	1.04854		5.7	0.243333		6.43	0.182957		26.59	1.03448		5.62	0.633758		6.31	0.642857		5.75	0.307692			26.32	3.93966		6.31	0.436667		5.94	1.15038		5.56	1.92857		5.81	1.56154
6.6	1.06796		5.81	0.23		6.56	0.192982		26.86	1.0431		5.79	0.624204		6.45	0.607143		5.81	0.323077			26.38	4.03448		6.52	0.43		6.1	1.15038		5.83	1.90714		6.08	1.59231
6.78	1.00971		5.99	0.223333		6.72	0.185464		26.93	1.06034		5.95	0.66242		6.67	0.685714		6.27	0.269231			26.5	4		6.67	0.433333		6.31	1.17043		5.98	2.01429		6.16	1.6
6.89	1.07767		6.24	0.223333		6.99	0.180451		27.2	1.09483		6.23	0.697452		6.87	0.671429		6.25	0.323077			26.84	3.90517		6.95	0.443333		6.37	1.16291		6.17	2.00714		6.35	1.57692
7.17	1.00971		6.41	0.21		7.1	0.195489		27.34	1.08621		6.43	0.684713		7.04	0.728571		6.85	0.353846			27.09	4.11207		7.06	0.413333		6.72	1.17544		6.52	2.06429		6.49	1.57692
7.37	1.08738		6.58	0.226667		7.29	0.195489		27.62	1.12069		6.6	0.719745		7.25	0.7		6.62	0.323077			27.35	3.9569		7.27	0.446667		6.91	1.17043		6.58	2.06429		6.75	1.63077
7.46	1.08738		6.81	0.236667		7.49	0.205514		27.8	1.11207		6.85	0.745223		7.45	0.757143		6.91	0.338462			27.48	3.9569		7.5	0.44		7	1.20301		6.87	2.07143		6.92	1.68462
7.58	1.1165		7	0.23		7.7	0.192982		27.98	1.18966		6.94	0.735669		7.63	0.75		7.03	0.353846			27.74	4.06034		7.65	0.45		7.19	1.21805		7.06	2.17857		7.17	1.65385
7.88	1.15534		7.23	0.22		8.02	0.18797		28.15	1.12069		7.27	0.783439		7.92	0.75		7.17	0.330769			27.98	3.96552		7.9	0.453333		7.42	1.23559		7.19	2.05		7.37	1.75385
8.15	1.1165		7.37	0.21		8.08	0.205514		28.34	1.18103		7.46	0.818471		8.1	0.757143		7.58	0.338462			28.06	4.00862		8.19	0.46		7.62	1.24812		7.49	2.22143		7.59	1.78462
8.19	1.20388		7.52	0.216667		8.35	0.195489		28.52	1.19828		7.69	0.824841		8.32	0.8		8.09	0.361538			28.42	3.96552		8.3	0.48		7.81	1.24311		7.67	2.24286		7.73	1.81538
8.38	1.19417		7.81	0.23		8.53	0.205514		28.79	1.21552		7.88	0.859873		8.46	0.771429		8.11	0.346154			28.55	4.01724		8.52	0.49		7.96	1.23559		7.77	2.31429		7.96	1.84615
8.57	1.25243		7.96	0.23		8.72	0.205514		28.92	1.25		8.02	0.878981		8.75	0.785714		7.98	0.369231			28.6	3.93966		8.7	0.516667		8.2	1.21805		7.96	2.34286		8.23	1.8
8.72	1.30097		8.17	0.226667		8.9	0.200501		29.17	1.25862		8.34	0.901274		8.93	0.835714		8.63	0.392308			28.95	3.94828		8.86	0.5		8.38	1.25815		8.25	2.27857		8.29	1.85385
8.96	1.33981		8.34	0.233333		9.11	0.203008		29.42	1.25		8.53	0.926752		9.16	0.792857		8.51	0.369231			28.99	3.89655		9.06	0.543333		8.61	1.25313		8.49	2.33571		8.76	1.84615
9.11	1.34951		8.49	0.26		9.3	0.200501		29.59	1.26724		8.61	0.917197		9.31	0.771429		8.63	0.376923			29.3	3.94828		9.31	0.543333		8.85	1.29073		8.6	2.36429		8.71	1.86154
9.44	1.3301		8.81	0.24		9.63	0.197995		29.79	1.25		8.82	0.936306		9.52	0.814286		8.87	0.376923			29.45	4.06897		9.49	0.593333		8.93	1.26065		8.82	2.46429		8.86	1.93077
9.58	1.41748		8.88	0.25		9.75	0.20802		30	1.28448		8.99	0.971338		9.72	0.835714		9.49	0.361538			29.57	3.87069		9.72	0.586667		9.2	1.30075		8.88	2.43571		9.16	1.93077
9.94	1.42718		9.16	0.266667		9.92	0.213033		30.17	1.31034		9.27	1		9.94	0.878571		9.48	0.361538			29.95	3.90517		10.01	0.596667		9.35	1.30326		9.12	2.53571		9.16	2.02308
10.11	1.42718		9.39	0.27		10.13	0.20802		30.43	1.37069		9.44	0.993631		10.06	0.885714		9.44	0.384615			30.04	3.92241		10.21	0.596667		9.58	1.26316		9.47	2.52857		9.54	1.99231
10.25	1.46602		9.52	0.283333		10.31	0.215539		30.62	1.34483		9.68	1.04459		10.3	0.871429		9.74	0.376923			30.38	3.87069		10.36	0.64		9.83	1.28822		9.62	2.61429		9.63	2.01538
10.45	1.50485		9.7	0.306667		10.55	0.205514		30.7	1.4569		9.81	1.05414		10.5	0.878571		10.11	0.361538			30.35	3.82759		10.63	0.666667		10.04	1.32832		9.85	2.57857		9.92	2.01538
10.56	1.48544		9.93	0.3		10.7	0.210526		31.06	1.41379		10.07	1.04459		10.64	0.878571		10.13	0.353846			30.56	3.83621		10.81	0.686667		10.2	1.28822		10.01	2.67143		10.11	2.03846
10.74	1.50485		10.17	0.316667		10.99	0.215539		31.21	1.43103		10.2	1.1051		10.81	0.892857		10.35	0.4			30.88	3.7931		11.02	0.726667		10.45	1.33584		10.13	2.67857		10.38	2.03846
10.97	1.53398		10.41	0.306667		11.19	0.213033		31.47	1.43103		10.45	1.11146		11.06	0.928571		10.55	0.384615			31.07	3.78448		11.15	0.73		10.61	1.34837		10.38	2.72857		10.6	2.13077
11.06	1.59223		10.55	0.343333		11.23	0.230576		31.65	1.4569		10.81	1.1465		11.21	0.857143		10.68	0.407692			31.19	3.80172		11.38	0.756667		10.77	1.32581		10.57	2.74286		10.85	2.11538
11.4	1.58252		10.74	0.33		11.57	0.223058		31.72	1.5431		10.92	1.1242		11.41	0.964286		11.38	0.423077			31.41	3.81897		11.57	0.76		10.97	1.34586		10.7	2.74286		11.03	2.16923
11.56	1.64078		10.95	0.346667		11.72	0.238095		31.98	1.51724		11.15	1.20382		11.57	0.942857		11.11	0.4			31.56	3.69828		11.77	0.806667		11.24	1.37845		11	2.9		11.17	2.13077
11.77	1.63107		11.08	0.36		11.95	0.245614		32.2	1.5431		11.4	1.19108		11.81	0.957143		11.4	0.4			31.9	3.68966		11.94	0.8		11.42	1.37594		11.14	2.86429		11.44	2.12308
12.12	1.65049		11.33	0.373333		12.18	0.235589		32.5	1.58621		11.62	1.21019		12.01	0.978571		11.91	0.407692			32	3.7069		12.13	0.813333		11.62	1.38346		11.36	2.87857		11.62	2.3
12.31	1.59223		11.6	0.39		12.28	0.245614		32.53	1.59483		11.72	1.26433		12.27	0.992857		11.74	0.430769			32.12	3.69828		12.35	0.833333		11.8	1.38596		11.46	2.97857		11.8	2.16923
12.4	1.71845		11.76	0.396667		12.57	0.240602		32.77	1.57759		11.94	1.28344		12.38	0.992857		11.91	0.430769			32.41	3.68103		12.56	0.863333		11.96	1.4386		11.76	2.96429		11.97	2.27692
12.63	1.72816		12.02	0.386667		12.76	0.250627		33.03	1.59483		12.11	1.30255		12.61	0.964286		12.42	0.4			32.66	3.62931		12.76	0.86		12.2	1.4787		11.95	2.97857		12.18	2.3
12.92	1.66019		12.18	0.433333		12.91	0.263158		33.15	1.56034		12.35	1.31529		12.78	1.00714		12.65	0.438462			32.87	3.61207		12.97	0.9		12.4	1.51378		12.2	3.06429		12.25	2.4
13.06	1.74757		12.44	0.423333		13.1	0.275689		33.42	1.7069		12.54	1.30892		13.04	1.03571		12.91	0.423077			33.04	3.55172		13.14	0.893333		12.63	1.55388		12.29	3.10714		12.6	2.31538
13.35	1.70874		12.55	0.43		13.3	0.285714		33.6	1.71552		12.65	1.38535		13.21	1.05		13.01	0.446154			33.16	3.56034		13.34	0.933333		12.74	1.54887		12.61	3.12143		12.71	2.36154
13.46	1.78641		12.8	0.456667		13.51	0.280702		33.84	1.75862		12.82	1.36306		13.36	1.05714		13.19	0.461538			33.45	3.49138		13.53	0.956667		12.99	1.6015		12.82	3.17143		12.93	2.38462
13.66	1.7767		13.1	0.453333		13.7	0.300752		34.02	1.72414		13.13	1.37898		13.66	1.07857		13.01	0.469231			33.57	3.58621		13.68	0.986667		13.23	1.60902		12.95	3.23571		13.29	2.39231
13.85	1.82524		13.25	0.473333		14	0.285714		34.14	1.74138		13.27	1.46178		13.81	1.08571		13.19	0.461538			33.81	3.49138		13.93	1.02		13.45	1.66416		13.08	3.21429		13.36	2.36923
14.13	1.79612		13.42	0.456667		14.24	0.293233		34.4	1.77586		13.49	1.46497		14	1.1		13.42	0.453846			33.99	3.44828		14.11	0.996667		13.63	1.72932		13.42	3.17857		13.73	2.33846
14.3	1.90291		13.67	0.476667		14.43	0.305764		34.6	1.84483		13.66	1.44268		14.22	1.10714		13.59	0.5			34.24	3.53448		14.38	0.993333		13.79	1.73684		13.7	3.24286		13.74	2.52308
14.59	1.82524		13.87	0.493333		14.47	0.315789		34.75	1.7931		13.88	1.49682		14.48	1.17857		13.7	0.476923			34.27	3.41379		14.58	1.00667		13.98	1.79198		13.73	3.32857		14.02	2.53077
14.73	1.86408		14.07	0.493333		14.76	0.328321		34.96	1.87069		14.02	1.55414		14.61	1.15714		14.06	0.5			34.67	3.41379		14.74	1.05333		14.31	1.81203		14	3.35714		14.17	2.49231
14.95	1.8932		14.28	0.513333		14.99	0.323308		35.13	1.82759		14.22	1.53822		14.85	1.14286		14.24	0.5			34.79	3.37069		14.95	1.06667		14.47	1.82707		14.09	3.42857		14.47	2.48462
15.08	1.84466		14.53	0.53		15.08	0.323308		35.41	1.87069		14.43	1.57962		15.07	1.15714		14.37	0.515385			35.08	3.35345		15.1	1.11333		14.74	1.90977		14.45	3.38571		14.58	2.54615
15.25	1.93204		14.67	0.533333		15.32	0.338346		35.59	1.99138		14.73	1.58917		15.29	1.17857		14.56	0.492308			35.19	3.34483		15.32	1.12333		14.88	1.93233		14.54	3.4		14.84	2.55385
15.45	1.92233		14.88	0.563333		15.56	0.353383		35.78	1.94828		14.92	1.62739		15.45	1.17857		15.23	0.492308			35.42	3.35345		15.56	1.12333		15.08	1.95238		14.8	3.48571		14.99	2.48462
15.69	1.94175		15.07	0.546667		15.77	0.33584		36.04	2.03448		15.08	1.61783		15.66	1.23571		15.02	0.538462			35.67	3.31034		15.81	1.16667		15.27	1.97494		14.93	3.58571		15.1	2.56923
15.84	1.91262		15.2	0.556667		16.03	0.358396		36.22	2.01724		15.23	1.67197		15.83	1.22857		15.57	0.5			35.85	3.15517		15.94	1.18		15.46	2.06516		15.16	3.53571		15.44	2.51538
16.02	1.95146		15.38	0.556667		16.14	0.353383		36.39	2.07759		15.45	1.70382		16.12	1.29286		15.7	0.546154			36.06	3.30172		16.16	1.20333		15.7	2.04762		15.31	3.58571		15.7	2.68462
16.34	1.95146		15.64	0.57		16.2	0.363409		36.58	2.0431		15.57	1.71019		16.2	1.25		15.77	0.538462			36.29	3.13793		16.42	1.22		15.92	2.07769		15.42	3.50714		15.72	2.60769
16.44	2		15.81	0.593333		16.48	0.360902		36.81	2.12931		15.77	1.78025		16.45	1.27857		16.16	0.546154			36.49	3.14655		16.56	1.20333		16.1	2.10526		15.77	3.52143		15.9	2.66154
16.6	2.02913		16.07	0.6		16.68	0.373434		37.05	2.12931		16.05	1.76115		16.65	1.27857		16.51	0.576923			36.79	3.10345		16.68	1.21667		16.23	2.19048		16.05	3.58571		16.18	2.68462
16.77	2.05825		16.23	0.62		16.85	0.380952		37.14	2.12931		16.14	1.79618		16.85	1.32143		16.31	0.561538			36.82	3.12069		16.94	1.24333		16.48	2.16291		16.14	3.64286		16.39	2.66154
17.02	2.07767		16.42	0.61		17.15	0.388471		37.38	2.14655		16.42	1.83121		17.01	1.35714		16.81	0.569231			37.15	3.06897		17.17	1.28333		16.62	2.20802		16.42	3.62143		16.44	2.63077
17.27	2.01942		16.68	0.623333		17.33	0.385965		37.64	2.22414		16.62	1.87261		17.2	1.33571		16.76	0.630769			37.35	3.05172		17.42	1.29667		16.87	2.25313		16.5	3.67857		16.61	2.73846
17.52	2.08738		16.81	0.62		17.6	0.406015		37.78	2.23276		16.88	1.8758		17.48	1.36429		16.88	0.569231			37.38	3.0431		17.52	1.30667		17.07	2.30576		16.74	3.69286		16.94	2.88462
17.57	2.1068		17.04	0.646667		17.62	0.403509		37.92	2.30172		16.96	1.92357		17.63	1.42857		17.11	0.561538			37.69	3.06897		17.72	1.34		17.21	2.30075		16.98	3.73571		17.16	2.80769
17.85	2.12621		17.24	0.656667		17.9	0.413534		38.22	2.31034		17.26	1.92994		17.94	1.42857		17.24	0.615385			37.92	3		17.94	1.36		17.45	2.3584		17.26	3.82143		17.24	2.77692
18.04	2.1068		17.39	0.663333		18.11	0.421053		38.42	2.34483		17.45	1.9586		18.15	1.38571		17.7	0.607692			38	2.87069		18.13	1.35		17.61	2.35338		17.33	3.79286		17.6	2.88462
18.23	2.13592		17.62	0.64		18.33	0.41604		38.49	2.32759		17.61	1.98408		18.33	1.39286		17.7	0.646154			38.26	2.98276		18.38	1.38667		17.85	2.38095		17.62	3.88571		17.76	2.86154
18.46	2.18447		17.81	0.683333		18.42	0.423559		38.72	2.33621		17.79	2.03822		18.59	1.42143		17.85	0.653846			38.45	2.82759		18.56	1.45333		18	2.43358		17.87	3.87143		17.89	2.86923
18.7	2.23301		18.04	0.72		18.68	0.428571		39.02	2.51724		18.09	2.0828		18.7	1.46429		18.18	0.646154			38.61	2.7931		18.78	1.41		18.27	2.4386		17.99	3.87143		18.13	2.78462
18.84	2.26214		18.13	0.683333		19	0.441103		39.18	2.57759		18.27	2.07643		18.96	1.55		18.29	0.676923			38.68	2.72414		18.9	1.45333		18.42	2.43358		18.23	3.90714		18.38	2.89231
19.11	2.21359		18.4	0.686667		19.13	0.443609		39.35	2.4569		18.5	2.14331		19.13	1.56429		18.63	0.692308			38.98	2.7931		19.18	1.45333		18.6	2.51128		18.46	3.87143		18.59	2.90769
19.24	2.27184		18.61	0.736667		19.27	0.438596		39.5	2.49138		18.7	2.11465		19.31	1.52857		18.92	0.7			39.3	2.68966		19.34	1.40667		18.86	2.5188		18.68	3.95714		18.88	2.95385
19.46	2.23301		18.74	0.736667		19.51	0.47619		39.8	2.64655		18.85	2.14968		19.49	1.55		18.88	0.715385			39.3	2.77586		19.6	1.47333		19.03	2.57143		18.88	3.91429		19.01	2.96923
19.67	2.34951		19.05	0.72		19.58	0.463659		39.98	2.68966		19.11	2.2293		19.67	1.57143		19.1	0.669231			39.63	2.66379		19.76	1.44667		19.22	2.56892		19.11	4.00714		19.19	2.96923
19.82	2.28155		19.22	0.743333		19.79	0.461153		40.22	2.65517		19.3	2.23885		19.85	1.58571		19.53	0.715385			39.7	2.63793		20.02	1.52667		19.42	2.57393		19.17	4.02857		19.43	2.90769
20.02	2.21359		19.34	0.743333		20.09	0.468672		40.41	2.78448		19.49	2.28981		20.1	1.57143		19.56	0.753846			39.95	2.62069		20.17	1.5		19.69	2.60401		19.4	3.95		19.6	3.02308
20.15	2.30097		19.6	0.776667		20.33	0.473684		40.6	2.74138		19.69	2.28981		20.27	1.62143		19.95	0.776923			40.2	2.53448		20.35	1.54667		19.87	2.61905		19.6	4.05		19.75	3.02308
20.44	2.45631		19.77	0.766667		20.54	0.488722		40.73	2.78448		19.86	2.28025		20.48	1.65714		19.88	0.769231			40.22	2.58621		20.58	1.54		19.99	2.62406		19.87	4.05		19.95	3.06154
20.67	2.36893		20.02	0.81		20.77	0.498747		41.04	2.75862		20.06	2.33439		20.7	1.62143		20.38	0.807692			40.56	2.62069		20.78	1.55		20.25	2.65915		19.99	4.01429		20.06	3.08462
20.9	2.33981		20.26	0.83		20.81	0.478697		41.11	2.83621		20.35	2.36306		20.92	1.66429		20.32	0.853846			40.77	2.4569		20.92	1.59667		20.46	2.68421		20.11	4.04286		20.35	3
21.02	2.33981		20.43	0.823333		21.07	0.498747		41.3	2.91379		20.52	2.37898		21.01	1.64286		20.72	0.838462			40.95	2.46552		21.18	1.59667		20.61	2.70677		20.39	4.10714		20.61	3.06923
21.18	2.38835		20.56	0.856667		21.27	0.491228		41.49	2.93103		20.74	2.43312		21.19	1.72857		20.82	0.846154			41.2	2.5		21.38	1.61		20.82	2.6817		20.63	4.07143		20.67	3.03077
21.45	2.4466		20.85	0.826667		21.4	0.488722		41.75	2.98276		20.99	2.48089		21.4	1.71429		21.31	0.838462			41.4	2.33621		21.62	1.61333		21.07	2.74937		20.83	4.05		20.95	3.06923
21.71	2.46602		21.02	0.86		21.65	0.513784		41.98	3.09483		21.16	2.5414		21.69	1.71429		21.25	0.9			41.59	2.2069		21.74	1.61667		21.19	2.76942		20.99	4		21.21	3.02308
21.88	2.50485		21.19	0.846667		21.87	0.496241		42.09	3.05172		21.36	2.57325		21.81	1.78571		21.41	0.9			41.69	2.32759		22.05	1.64333		21.46	2.78446		21.16	4.11429		21.38	3.05385
22.13	2.53398		21.47	0.863333		22.11	0.526316		42.41	3.15517		21.53	2.56688		22.05	1.75714		21.54	0.969231			42.02	2.43103		22.11	1.67		21.65	2.78947		21.35	4.1		21.56	3.07692
22.2	2.47573		21.62	0.88		22.28	0.513784		42.45	3.2069		21.77	2.59873		22.22	1.80714		22.06	0.961538			42.2	2.28448		22.29	1.66		21.85	2.77945		21.56	4.03571		21.8	3.16154
22.44	2.46602		21.85	0.88		22.35	0.518797		42.69	3.15517		21.85	2.67516		22.47	1.85		21.91	0.976923			42.52	2.25862		22.55	1.66333		22	2.81704		21.77	4.05		21.88	3.11538
22.73	2.57282		21.98	0.903333		22.64	0.538847		42.86	3.28448		22.07	2.67516		22.69	1.9		22.23	1.03077			42.64	2.19828		22.76	1.64		22.27	2.81454		21.98	4.09286		22.18	3.00769
22.92	2.58252		22.2	0.93		22.78	0.538847		43.17	3.23276		22.31	2.67516		22.81	1.87143		22.55	1.02308			42.84	2.13793		22.94	1.71333		22.45	2.82456		22.14	4.10714		22.36	3.11538
23.11	2.49515		22.4	0.92		22.91	0.518797		43.23	3.26724		22.51	2.74204		23.07	1.77857		22.58	1.05385			43.05	2.06897		23.14	1.73333		22.65	2.86216		22.34	4.08571		22.51	3.03077
23.24	2.66019		22.64	0.93		23.2	0.52381		43.58	3.31897		22.73	2.70382		23.23	1.92857		22.73	1.09231			43.22	2.12069		23.27	1.73333		22.86	2.88221		22.56	4.11429		22.73	3.08462
23.42	2.62136		22.82	0.963333		23.45	0.568922		43.76	3.41379		22.86	2.78981		23.41	1.96429		23.11	1.10769			43.38	2.12069		23.57	1.68		23.04	2.83709		22.85	4.14286		22.94	3.03846
23.74	2.65049		23.04	0.963333		23.67	0.546366		43.88	3.46552		23.07	2.8535		23.67	1.95714		23.04	1.09231			43.54	2.10345		23.78	1.74333		23.29	2.90476		22.93	4.13571		23.16	3.11538
23.88	2.66019		23.23	0.943333		23.88	0.566416		44.25	3.41379		23.2	2.87261		23.83	1.95714		23.27	1.15385			43.76	2.07759		23.92	1.75333		23.5	2.91729		23.16	4.11429		23.36	3.08462
24.04	2.6699		23.41	0.973333		23.92	0.568922		44.28	3.49138		23.48	2.9172		24.06	1.93571		23.66	1.19231			44.01	2		24.13	1.77		23.67	2.89975		23.4	4.04286		23.57	3.09231
24.22	2.68932		23.72	1.01333		24.2	0.556391		44.57	3.5431		23.7	2.92675		24.22	2.05714		23.7	1.16154			44.16	1.88793		24.32	1.77		23.81	2.90977		23.61	4.08571		23.86	3.01538
24.37	2.6699		23.78	0.996667		24.31	0.591479		44.77	3.51724		23.92	3.01592		24.46	2.05		24.14	1.26923			44.34	1.92241		24.59	1.76333		23.99	2.92481		23.7	4.1		24.04	3.07692
24.59	2.68932		24.02	1.03667		24.63	0.586466		45.06	3.7069		24.03	2.97771		24.68	2.15		24.25	1.2			44.67	1.91379		24.68	1.81333		24.2	2.90476		24.01	4.02143		24.2	3.01538
24.91	2.76699		24.21	1.02		24.84	0.586466		45.26	3.67241		24.25	3.06051		24.88	2.06429		24.59	1.23846			44.8	1.87931		24.98	1.78		24.41	2.93233		24.22	4.12143		24.44	3.03846
24.99	2.68932		24.43	1.02333		25.06	0.596491		45.35	3.61207		24.5	3.04777		25.05	2.13571		24.81	1.34615			45.02	1.88793		25.07	1.80667		24.59	2.91228		24.31	4.05714		24.62	2.96923
25.23	2.80583		24.6	1.07		25.24	0.581454		45.55	3.72414		24.71	3.12739		25.27	2.12143		24.66	1.31538			45.04	1.84483		25.33	1.81		24.85	2.95489		24.6	4.01429		24.86	3.01538
25.46	2.75728		24.84	1.07333		25.47	0.586466		45.76	3.81897		24.82	3.1242		25.42	2.18571		24.91	1.36154			45.39	1.82759		25.49	1.82		25.11	2.93734		24.79	4.01429		25.1	2.98462
25.69	2.86408		25.13	1.08		25.53	0.614035		45.89	3.88793		25.02	3.18153		25.65	2.18571		25.2	1.46154			45.56	1.7069		25.72	1.83		25.18	2.95238		24.85	3.97143		25.18	2.96154
25.82	2.80583		25.31	1.09667		25.83	0.619048		46.03	3.87931		25.2	3.22611		25.88	2.22143		25.29	1.4			45.78	1.80172		25.99	1.81333		25.45	2.98246		25.13	4.00714		25.47	2.95385
25.96	2.83495		25.42	1.07667		25.92	0.629073		46.35	3.91379		25.56	3.24522		25.96	2.23571		25.47	1.43846			45.88	1.71552		26.17	1.84		25.6	2.95739		25.38	4.01429		25.63	2.93077
26.24	2.8835		25.6	1.09333		26.26	0.656642		46.39	3.93103		25.64	3.29618		26.21	2.26429		25.74	1.5			46.17	1.68966		26.37	1.88		25.85	2.96491		25.54	4.08571		25.82	2.94615
26.38	2.99029		25.79	1.10667		26.49	0.616541		46.72	3.9569		25.87	3.3121		26.37	2.32857		25.85	1.50769			46.28	1.71552		26.52	1.8		26.06	2.96491		25.72	4.04286		26.02	2.96154
26.61	2.90291		26.01	1.13667		26.71	0.639098		46.94	4.06034		26.1	3.3535		26.6	2.33571		26.15	1.49231			46.6	1.65517		26.71	1.88		26.2	2.93233		26.06	4.01429		26.24	2.89231
26.78	2.93204		26.24	1.14667		26.87	0.636591		46.99	3.96552		26.19	3.37898		26.8	2.35		26.46	1.56154			46.69	1.62931		26.92	1.87333		26.42	2.93985		26.21	3.95714		26.28	2.86154
27.01	2.93204		26.41	1.15		27.01	0.661654		47.36	4.10345		26.41	3.40446		27.05	2.37857		26.66	1.61538			47.08	1.58621		27.2	1.89667		26.63	2.97744		26.42	3.99286		26.56	2.86923
27.32	2.98058		26.66	1.20667		27.16	0.661654		47.6	4.11207		26.68	3.39809		27.35	2.37143		26.88	1.66923			47.13	1.5431		27.39	1.87667		26.86	2.95489		26.63	3.99286		26.78	2.88462
27.43	3.08738		26.89	1.22333		27.47	0.654135		47.62	4.06897		26.92	3.52229		27.5	2.46429		26.91	1.68462			47.31	1.5431		27.6	1.93333		27.06	2.98246		26.84	3.88571		26.98	2.76154
27.6	2.93204		27.02	1.21333		27.7	0.669173		47.9	4.25		27.04	3.48089		27.61	2.44286		27.05	1.76154			47.42	1.5431		27.82	1.93333		27.18	2.96992		26.98	3.88571		27.16	2.71538
27.77	3.06796		27.27	1.26		27.82	0.671679		48.02	4.2069		27.29	3.55732		27.92	2.52857		27.5	1.76154			47.58	1.43966		27.98	1.94667		27.43	2.96241		27.12	3.85		27.27	2.78462
28.05	3.09709		27.44	1.24333		28.06	0.694236		48.39	4.30172		27.48	3.59554		28.18	2.49286		27.42	1.83846			47.77	1.43103		28.23	1.94667		27.7	2.97744		27.32	3.87857		27.49	2.82308
28.29	3.19417		27.61	1.27667		28.25	0.689223		48.46	4.26724		27.73	3.6051		28.35	2.47857		27.7	1.86923			48.09	1.47414		28.33	1.89667		27.86	2.98496		27.57	3.85		27.79	2.75385
28.49	3.02913		27.81	1.25667		28.43	0.686717		48.68	4.32759		27.84	3.66879		28.52	2.6		27.9	1.90769			48.31	1.46552		28.56	1.92667		28.04	2.94486		27.87	3.87143		27.95	2.63077
28.56	3.1068		27.98	1.29		28.73	0.709273		48.95	4.35345		28.02	3.65924		28.79	2.58571		27.98	1.93077			48.58	1.4569		28.79	1.90667		28.23	2.96992		27.99	3.82857		28.1	2.58462
28.73	3.12621		28.18	1.3		28.75	0.706767		49.1	4.38793		28.18	3.71656		28.97	2.6		28.17	2.01538			48.63	1.43103		29.05	1.9		28.47	2.94987		28.23	3.77857		28.45	2.7
28.98	3.15534		28.38	1.32333		28.97	0.716792		49.2	4.50862		28.45	3.75478		29.13	2.65		28.48	2.07692			48.93	1.37931		29.16	1.90333		28.68	2.93233		28.55	3.77143		28.52	2.57692
29.22	3.24272		28.57	1.30667		29.2	0.699248		49.38	4.47414		28.67	3.77389		29.38	2.62143		28.77	2.10769			49.18	1.34483		29.36	1.98		28.92	2.90226		28.7	3.75		28.85	2.58462
29.55	3.15534		28.86	1.36333		29.45	0.704261		49.72	4.44828		28.92	3.85669		29.55	2.68571		28.86	2.15385			49.32	1.27586		29.6	1.96667		29.12	2.93484		28.88	3.77143		29	2.54615
29.54	3.25243		29.04	1.31333		29.72	0.744361		49.77	4.62069		29.02	3.89172		29.73	2.73571		29.36	2.15385			49.61	1.30172		29.79	1.94667		29.3	2.9198		29.04	3.68571		29.22	2.48462
29.88	3.31068		29.2	1.39333		29.8	0.749373		50.02	4.49138		29.31	3.92994		29.85	2.74286		29.5	2.25385			49.74	1.27586		29.95	1.92		29.42	2.93985		29.22	3.68571		29.32	2.50769
30.02	3.23301		29.36	1.37667		30.07	0.766917		50.31	4.5431		29.47	3.9586		30.09	2.80714		29.56	2.23846			49.94	1.25		30.16	1.95667		29.68	2.91729		29.38	3.67143		29.54	2.43077
30.32	3.29126		29.67	1.39667		30.25	0.766917		50.53	4.56897		29.62	3.91083		30.24	2.80714		30.02	2.30769			50.17	1.25862		30.35	1.91667		29.89	2.88972		29.68	3.68571		29.79	2.43077
30.39	3.2233		29.81	1.42333		30.37	0.759398		50.79	4.49138		29.86	3.99045		30.46	2.82857		29.94	2.37692			50.28	1.24138		30.55	1.95333		30.06	2.87719		29.86	3.65714		29.89	2.4
30.67	3.32039		30.02	1.42667		30.57	0.799499		50.78	4.66379		30.09	4.00955		30.63	2.82143		30.14	2.36154			50.63	1.28448		30.73	1.95		30.23	2.88972		29.99	3.65714		30.06	2.40769
30.71	3.34951		30.23	1.46333		30.7	0.781955		51.02	4.7069		30.21	4.05414		30.82	2.92857		30.7	2.49231			50.78	1.19828		31	1.92667		30.49	2.85714		30.2	3.54286		30.25	2.37692
31.07	3.40777		30.35	1.46667		30.95	0.784461		51.23	4.67241		30.53	4.07643		30.99	2.89286		30.62	2.55385			50.85	1.2069		31.19	1.92333		30.67	2.84712		30.32	3.6		30.48	2.29231
31.19	3.35922		30.67	1.49667		31.27	0.814536		51.38	4.7069		30.75	4.12102		31.12	2.95714		30.98	2.54615			51.33	1.22414		31.38	1.96667		30.87	2.84962		30.62	3.55		30.73	2.29231
31.41	3.3301		30.83	1.50333		31.51	0.784461		51.7	4.7069		30.96	4.13376		31.41	2.89286		30.94	2.58462			51.29	1.18966		31.53	1.96333		31.01	2.82456		30.81	3.46429		30.95	2.25385
31.67	3.3301		31.02	1.47		31.61	0.794486		51.86	4.74138		31.26	4.20701		31.61	2.97143		31.13	2.69231			51.54	1.14655		31.72	1.93333		31.26	2.81454		31.05	3.5		31.1	2.26154
31.9	3.41748		31.21	1.56		31.83	0.814536		52.17	4.71552		31.37	4.20382		31.9	3.04286		31.64	2.81538			51.73	1.18103		31.9	1.90333		31.47	2.81955		31.14	3.45714		31.33	2.26154
32.09	3.49515		31.38	1.55667		31.9	0.819549		52.24	4.7931		31.6	4.26115		31.98	3.05		31.85	2.75385			51.95	1.15517		32.18	1.88		31.61	2.78446		31.31	3.42857		31.56	2.21538
32.22	3.40777		31.58	1.54667		32.13	0.867168		52.38	4.82759		31.81	4.24841		32.23	3.06429		31.92	2.80769			52.06	1.11207		32.34	1.95		31.77	2.76942		31.56	3.43571		31.73	2.09231
32.44	3.42718		31.83	1.56		32.43	0.847118		52.53	4.85345		31.98	4.29299		32.48	3.05		32.29	2.93077			52.45	1.06897		32.56	1.94667		32.05	2.78947		31.74	3.47143		32	2.07692
32.66	3.47573		32.03	1.58333		32.61	0.862155		52.8	4.80172		32.13	4.34395		32.63	3.16429		32.16	2.96154			52.33	1.13793		32.7	1.92667		32.25	2.73684		31.88	3.42857		32.18	2.1
32.81	3.58252		32.18	1.61333		32.81	0.85213		53.1	4.88793		32.31	4.38535		32.88	3.19286		32.34	2.87692			52.89	1.12069		32.88	1.87333		32.42	2.75689		32.13	3.4		32.38	2.06923
33.04	3.5534		32.38	1.64		33.13	0.859649		53.22	4.80172		32.46	4.37261		33.03	3.20714		32.55	3.03846			52.86	1.12931		33.13	1.9		32.67	2.7218		32.35	3.35714		32.52	2.07692
33.24	3.58252		32.63	1.63		33.27	0.859649		53.46	4.92241		32.67	4.45541		33.26	3.2		32.77	3.02308			53.02	1.11207		33.35	1.89333		32.85	2.6792		32.67	3.23571		32.74	1.98462
33.47	3.61165		32.85	1.63333		33.42	0.899749		53.57	4.74138		32.88	4.48408		33.38	3.19286		33.1	3.1			53.19	1.06897		33.48	1.90333		33.04	2.69173		32.76	3.25714		33.04	1.90769
33.63	3.58252		33.09	1.71667		33.52	0.894737		53.95	4.84483		33.04	4.46815		33.76	3.25		33.09	3.13077			53.6	1.10345		33.75	1.88333		33.15	2.68922		33.13	3.24286		33.17	1.96154
33.77	3.69903		33.31	1.69333		33.78	0.924812		54.02	5.00862		33.27	4.5414		33.87	3.22143		33.45	3.18462			53.61	1.06897		33.97	1.85333		33.42	2.70677		33.22	3.24286		33.41	1.92308
34.02	3.66019		33.36	1.70333		33.99	0.914787		54.27	4.97414		33.49	4.56051		34.03	3.29286		33.55	3.22308			53.97	1.12931		34.14	1.82333		33.64	2.64912		33.41	3.23571		33.45	1.94615
34.31	3.71845		33.64	1.74		34.19	0.932331		54.42	4.93103		33.67	4.57962		34.24	3.37143		33.85	3.25385			54.27	1.07759		34.31	1.88667		33.8	2.61905		33.52	3.24286		33.78	1.86154
34.42	3.69903		33.81	1.75		34.47	0.937343		54.63	4.87069		33.89	4.60191		34.45	3.33571		34.12	3.3			54.12	1.01724		34.5	1.79		34.03	2.60401		33.84	3.14286		33.94	1.93077
34.64	3.67961		34.08	1.77667		34.64	0.9599		54.8	4.91379		34.08	4.62739		34.64	3.48571		34.22	3.36923			54.62	1.03448		34.75	1.8		34.26	2.59398		33.97	3.07143		34.08	1.80769
34.79	3.75728		34.26	1.78667		34.84	0.977444		54.99	4.90517		34.24	4.70382		34.86	3.39286		34.4	3.4			54.53	1		34.92	1.8		34.42	2.57895		34.14	3.04286		34.43	1.80769
34.99	3.67961		34.42	1.80333		35.01	0.982456		55.28	4.75		34.45	4.68471		35.08	3.45714		34.5	3.46154			54.96	1.00862		35.07	1.8		34.68	2.54887		34.33	3.03571		34.7	1.71538
35.14	3.75728		34.6	1.84667		35.12	0.949875		55.35	4.91379		34.66	4.75159		35.29	3.52857		34.86	3.47692			54.9	1.0431		35.33	1.81		34.85	2.53634		34.6	2.96429		34.86	1.71538
35.4	3.78641		34.88	1.86		35.27	1.00251		55.52	4.91379		34.84	4.74522		35.51	3.55		34.86	3.46154			55.13	1.02586		35.55	1.8		35.02	2.51629		34.84	2.97857		35.1	1.67692
35.67	3.8932		35.03	1.83667		35.52	0.997494		55.85	4.81897		35.08	4.78981		35.61	3.55714		35.31	3.62308			55.44	1.01724		35.69	1.76667		35.27	2.4812		34.9	2.95714		35.27	1.64615
35.76	3.91262		35.27	1.85667		35.85	1.01504		55.97	4.89655		35.23	4.81847		35.83	3.5		35.51	3.66923			55.52	1.03448		35.94	1.75		35.5	2.4411		35.17	2.95714		35.42	1.68462
35.97	3.75728		35.36	1.90667		36.06	1.02506		56.23	4.76724		35.45	4.83439		36.02	3.55		35.41	3.81538			55.74	1.01724		36.14	1.77667		35.64	2.46366		35.38	2.93571		35.56	1.63846
36.22	3.80583		35.62	1.92667		36.25	1.04762		56.33	4.66379		35.7	4.85032		36.27	3.62857		35.9	3.76154			55.83	1.00862		36.39	1.73		35.9	2.42607		35.59	2.90714		35.83	1.6
36.39	3.90291		35.81	1.89333		36.41	1.03258		56.49	4.73276		35.86	4.88217		36.49	3.68571		35.73	3.84615			56.15	1		36.56	1.79667		36.06	2.40351		35.74	2.85714		36.1	1.53846
36.6	4		35.96	1.94		36.6	1.08772		56.79	4.64655		35.97	4.88535		36.64	3.66429		36.36	3.81538			56.38	1.03448		36.77	1.70333		36.24	2.38596		35.96	2.87143		36.16	1.61538
36.81	3.90291		36.27	1.95667		36.77	1.07268		56.96	4.64655		36.25	4.92675		36.88	3.81429		36.47	3.92308			56.64	1.03448		36.92	1.72333		36.46	2.32581		36.14	2.72857		36.44	1.5
37	3.91262		36.39	1.95667		36.95	1.10276		57.14	4.61207		36.57	4.99363		36.98	3.75714		36.51	3.88462			56.71	1.05172		37.15	1.69		36.67	2.34085		36.27	2.82857		36.57	1.46923
37.23	3.99029		36.64	1.99		37.17	1.09273		57.36	4.62931		36.67	5.00637		37.19	3.77857		36.7	3.99231			57.06	1.00862		37.38	1.7		36.85	2.28822		36.52	2.70714		36.79	1.43846
37.4	4		36.88	2.02		37.42	1.09524		57.61	4.58621		36.88	5.03822		37.41	3.82143		36.92	3.96923			57.12	1.05172		37.52	1.68		37.07	2.26566		36.79	2.73571		36.93	1.50769
37.54	4		37.03	1.99333		37.61	1.11028		57.74	4.50862		37.07	5.0414		37.64	3.87143		37.1	4.06923			57.38	0.965517		37.71	1.68		37.31	2.21805		37	2.66429		37.17	1.32308
37.74	3.95146		37.28	2.06667		37.81	1.14035		57.94	4.51724		37.26	5.06369		37.99	3.76429		37.35	4.07692			57.79	1.06034		37.93	1.63667		37.49	2.19298		37.05	2.74286		37.47	1.36923
38.06	4.1068		37.34	2.07333		38.04	1.14536		58.14	4.51724		37.42	5.11783		38.26	3.86429		37.68	4.12308			57.87	0.982759		38.09	1.67667		37.69	2.21303		37.4	2.60714		37.52	1.40769
38.2	4.02913		37.63	2.08		38.26	1.17794		58.3	4.40517		37.7	5.08599		38.42	3.90714		37.85	4.17692			57.92	1		38.38	1.64333		37.88	2.14787		37.68	2.62143		37.77	1.35385
38.39	4.1068		37.87	2.05		38.31	1.15539		58.61	4.37069		37.87	5.11465		38.56	3.92857		37.87	4.10769			58.1	0.982759		38.58	1.63		38.1	2.12531		37.85	2.55714		37.93	1.33846
38.68	4.23301		38.1	2.11667		38.54	1.21053		58.64	4.37931		38.06	5.20064		38.73	3.96429		38.17	4.27692			58.38	1.01724		38.77	1.58		38.28	2.14536		37.98	2.6		38.11	1.28462
38.79	4.13592		38.3	2.11		38.85	1.22306		58.95	4.30172		38.25	5.20064		38.93	3.9		38.26	4.24615			58.8	1.00862		38.86	1.55		38.44	2.14787		38.2	2.52857		38.25	1.26154
38.94	4.17476		38.4	2.12333		39.06	1.2381		59.08	4.13793		38.49	5.22611		39.15	4		38.56	4.36923			58.7	1.07759		39.06	1.55		38.74	2.05764		38.35	2.52857		38.56	1.22308
39.09	4.24272		38.7	2.18667		39.22	1.22055		59.28	4.2931		38.68	5.23567		39.3	4.01429		38.67	4.40769			59.2	1.07759		39.29	1.56333		38.85	2.03759		38.63	2.5		38.75	1.21538
39.49	4.26214		38.88	2.16667		39.43	1.22556		59.52	4.14655		38.86	5.26115		39.49	4.01429		39.16	4.33077			59.2	1.06897		39.58	1.54667		39.06	2.02005		38.88	2.37143		38.95	1.18462
39.7	4.25243		38.99	2.24333		39.59	1.27318		59.67	4.18103		39.03	5.32484		39.68	3.95714		39.1	4.47692			59.43	1.0431		39.74	1.54333		39.31	1.98246		39.11	2.41429		39.08	1.17692
39.73	4.25243		39.24	2.18333		39.85	1.31078		59.94	3.98276		39.32	5.32166		39.87	4.05		39.42	4.50769			59.8	1.02586		39.87	1.51667		39.52	1.93734		39.31	2.42143		39.34	1.16923
40.01	4.27184		39.38	2.24		39.94	1.31579		60.11	3.92241		39.42	5.30573		40.11	4.10714		39.72	4.44615			59.77	1.05172		40.1	1.51333		39.7	1.92732		39.49	2.38571		39.56	1.15385
40.2	4.37864		39.65	2.2		40.17	1.35088		60.42	3.86207		39.75	5.35669		40.24	4.12143		39.82	4.53077			59.9	1.00862		40.31	1.47667		39.85	1.88471		39.63	2.34286		39.66	1.13077
40.51	4.26214		39.82	2.23667		40.42	1.3584		60.48	3.81897		39.86	5.3535		40.51	4.12143		39.98	4.61538			60.17	1.08621		40.48	1.46		40.03	1.85213		39.92	2.35714		40	1.10769
40.59	4.24272		40.01	2.26333		40.68	1.35088		60.73	3.78448		40.07	5.38854		40.63	4.13571		40.13	4.72308			60.5	1.05172		40.7	1.46		40.24	1.83709		40.05	2.29286		40.1	1.06923
40.85	4.36893		40.13	2.28333		40.74	1.37093		60.87	3.64655		40.22	5.43949		40.85	4.10714		40.43	4.66923			60.78	1.0431		40.92	1.44667		40.49	1.80702		40.27	2.25714		40.3	1.09231
41.09	4.37864		40.42	2.29		41.02	1.37594		61.08	3.58621		40.54	5.49045		41.01	4.07143		40.75	4.67692			60.91	1.06034		41.15	1.42667		40.74	1.79699		40.39	2.20714		40.59	1.03077
41.2	4.42718		40.63	2.25333		41.2	1.38847		61.34	3.43103		40.73	5.43312		41.25	4.13571		40.85	4.68462			61.08	1.08621		41.32	1.39333		40.81	1.79198		40.61	2.16429		40.75	0.969231
41.4	4.41748		40.87	2.31		41.42	1.3985		61.47	3.44828		40.9	5.49682		41.35	4.25714		40.96	4.69231			61.16	1.06897		41.49	1.41333		41.03	1.71679		40.8	2.15714		40.95	1.00769
41.56	4.48544		41.06	2.29333		41.49	1.45113		61.65	3.42241		41.13	5.51911		41.71	4.3		41.09	4.76154			61.18	1.00862		41.7	1.39333		41.27	1.71178		41.06	2.19286		41.13	1
41.78	4.54369		41.24	2.29667		41.73	1.45614		61.85	3.31034		41.35	5.50318		41.85	4.22857		41.44	4.73077			61.69	1.03448		41.88	1.37333		41.45	1.70426		41.25	2.07857		41.42	0.969231
41.99	4.42718		41.42	2.37667		42	1.46617		62.11	3.22414		41.56	5.5414		42.06	4.27857		41.56	4.78462			61.67	1.06897		42.11	1.32		41.64	1.62406		41.4	2.12857		41.6	0.938462
42.26	4.40777		41.56	2.35667		42.2	1.50125		62.22	3.10345		41.77	5.55414		42.31	4.22857		41.94	4.78462			62.04	1.0431		42.34	1.35667		41.9	1.62155		41.64	2.02857		41.76	0.969231
42.49	4.45631		41.8	2.38333		42.45	1.5213		62.42	3.18966		41.97	5.56051		42.45	4.22143		42.21	4.94615			62.22	1.08621		42.52	1.32333		42.02	1.57895		41.71	2.02143		42.02	0.930769
42.67	4.5534		41.99	2.41333		42.57	1.51128		62.68	3.10345		42.14	5.55096		42.63	4.35		42.36	4.80769			62.35	1.08621		42.78	1.32		42.2	1.54887		42.04	1.99286		42.14	0.853846
42.95	4.68932		42.19	2.41333		42.81	1.57143		62.87	3		42.36	5.6051		42.88	4.32143		42.56	4.93846			62.6	1.08621		42.9	1.27667		42.47	1.55138		42.17	1.94286		42.35	0.892308
43.01	4.61165		42.43	2.4		43.1	1.56892		63.06	2.80172		42.66	5.59554		43.06	4.24286		42.79	4.96923			62.67	1.0431		43.13	1.27333		42.71	1.51128		42.35	1.95		42.6	0.892308
43.08	4.65049		42.66	2.44		43.12	1.59398		63.27	2.83621		42.74	5.6051		43.27	4.37857		42.81	4.90769			62.95	1.03448		43.29	1.26		42.81	1.46115		42.56	1.86429		42.74	0.876923
43.36	4.59223		42.79	2.41333		43.36	1.62907		63.5	2.73276		43.02	5.61465		43.49	4.31429		42.99	4.93846			62.95	1.03448		43.49	1.26333		43.01	1.45363		42.78	1.81429		43	0.869231
43.59	4.67961		42.93	2.44333		43.66	1.61153		63.6	2.68966		43.12	5.62739		43.63	4.35714		43.17	4.97692			63.11	1		43.74	1.22667		43.31	1.43609		42.98	1.81429		43.07	0.830769
43.82	4.65049		43.21	2.45		43.85	1.64411		63.82	2.63793		43.27	5.62739		43.85	4.37857		43.61	5			63.38	1.06034		43.92	1.21		43.42	1.401		43.22	1.84286		43.31	0.823077
44.01	4.6699		43.38	2.51667		44.03	1.66416		64.04	2.5		43.45	5.63376		44.07	4.36429		43.6	5.11538			63.61	1.0431		44.16	1.23		43.7	1.36591		43.39	1.75		43.56	0.823077
44.2	4.69903		43.54	2.5		44.23	1.68672		64.35	2.44828		43.65	5.64013		44.19	4.50714		43.81	5.06154			63.67	1.01724		44.31	1.18		43.92	1.36341		43.59	1.75714		43.7	0.807692
44.35	4.85437		43.83	2.49		44.38	1.71178		64.45	2.37069		43.82	5.63057		44.42	4.33571		43.92	4.96923			63.93	1.03448		44.49	1.15667		43.99	1.32832		43.74	1.77143		43.87	0.830769
44.49	4.69903		44.04	2.55667		44.62	1.73935		64.61	2.32759		44.02	5.67834		44.58	4.37857		44.29	5.08462			64.2	1.06897		44.67	1.17667		44.21	1.31078		43.92	1.67143		44.13	0.753846
44.8	4.85437		44.27	2.51667		44.74	1.7594		64.74	2.33621		44.18	5.66242		44.81	4.40714		44.34	4.95385			64.24	1.06034		44.87	1.15333		44.42	1.31579		44.14	1.67143		44.33	0.7
45.06	4.82524		44.45	2.49333		44.87	1.80702		65	2.14655		44.45	5.69427		45.04	4.38571		44.55	5.05385			64.67	1.06034		45.09	1.16667		44.64	1.24561		44.38	1.62143		44.55	0.769231
45.2	4.87379		44.58	2.56667		45.18	1.80201		65.23	2.08621		44.57	5.68471		45.28	4.35714		44.88	4.99231			64.74	1.06034		45.28	1.14		44.95	1.26316		44.55	1.56429		44.8	0.723077
45.47	4.93204		44.88	2.53667		45.42	1.84712		65.46	2		44.93	5.70064		45.43	4.33571		44.96	5.02308			64.92	1.00862		45.49	1.11333		44.99	1.2005		44.74	1.64286		45.13	0.715385
45.69	4.99029		45.01	2.56		45.65	1.84712		65.59	1.99138		45.06	5.69745		45.58	4.37857		45.17	5.05385			65.42	1.05172		45.7	1.11667		45.35	1.20551		44.99	1.57143		45.25	0.7
45.86	4.93204		45.19	2.55667		45.76	1.82957		65.9	1.87069		45.21	5.69745		45.78	4.41429		45.45	5.11538			65.38	1		45.84	1.12333		45.45	1.17293		45.17	1.57857		45.54	0.7
46.01	5.07767		45.45	2.58		45.95	1.87719		66.02	1.86207		45.43	5.71019		45.98	4.31429		45.6	5.09231			65.69	1.00862		46.03	1.09667		45.67	1.14787		45.35	1.47143		45.67	0.7
46.09	5.01942		45.62	2.57		46.23	1.89223		66.18	1.73276		45.67	5.70382		46.2	4.37143		45.85	5.01538			65.77	0.982759		46.37	1.05333		45.93	1.14035		45.45	1.51429		45.86	0.653846
46.35	4.97087		45.78	2.58667		46.27	1.9198		66.37	1.7931		45.89	5.66879		46.39	4.31429		46.08	5.12308			65.99	1.03448		46.5	1.07667		46.04	1.11529		45.79	1.42143		46.08	0.707692
46.6	5.12621		46.01	2.64		46.57	1.93484		66.52	1.61207		46.1	5.71975		46.63	4.29286		46.23	5.06154			66.25	0.974138		46.65	1.03		46.2	1.09273		45.95	1.42143		46.28	0.669231
46.79	5.07767		46.25	2.6		46.74	1.94987		66.85	1.58621		46.31	5.72611		46.81	4.22143		46.28	5.06154			66.27	0.974138		46.89	1.02667		46.45	1.07268		46.26	1.42143		46.5	0.661538
46.96	5.17476		46.42	2.59		46.94	2.02256		67.06	1.56897		46.45	5.6879		47.1	4.42143		46.62	5.05385			66.49	0.991379		47.13	1.02667		46.65	1.05013		46.35	1.38571		46.56	0.630769
47.13	5.13592		46.55	2.65		47.18	2.00752		67.16	1.51724		46.6	5.70701		47.2	4.32857		46.91	5.19231			66.99	0.922414		47.27	1		46.85	1.03759		46.67	1.40714		46.91	0.623077
47.41	5.18447		46.77	2.64333		47.28	2.02757		67.35	1.49138		46.86	5.70064		47.43	4.34286		46.76	5.12308			67.21	1		47.45	1.00333		47.13	1.03258		46.87	1.35		46.99	0.638462
47.54	5.26214		47.04	2.60667		47.67	2.03258		67.63	1.34483		46.99	5.70701		47.63	4.34286		47.17	5.08462			67.35	0.991379		47.7	1.00667		47.29	1.01253		47.08	1.28571		47.31	0.638462
47.79	5.29126		47.2	2.63667		47.77	2.0802		67.88	1.33621		47.21	5.70382		47.84	4.32857		47.26	4.93846			67.45	0.956897		47.9	0.983333		47.55	1.00251		47.31	1.28571		47.47	0.6
47.92	5.21359		47.4	2.67333		47.86	2.12281		67.97	1.28448		47.45	5.71656		48.1	4.25714		47.42	5.10769			67.82	0.948276		48.14	0.94		47.66	0.97995		47.33	1.24286		47.7	0.6
48.2	5.23301		47.62	2.68		48.19	2.13033		68.13	1.19828		47.65	5.6879		48.24	4.30714		47.7	5.00769			68.14	0.956897		48.33	0.946667		47.96	0.964912		47.62	1.20714		47.84	0.546154
48.43	5.4466		47.82	2.69667		48.39	2.16291		68.34	1.18966		47.79	5.69745		48.49	4.17143		47.79	5.09231			68.03	0.922414		48.51	1.01333		48.14	0.937343		47.79	1.22143		48.02	0.523077
48.56	5.41748		48.02	2.60333		48.59	2.17794		68.6	1.11207		47.99	5.6465		48.67	4.22143		48.16	4.94615			68.2	0.862069		48.67	0.953333		48.42	0.932331		47.89	1.2		48.14	0.6
48.71	5.52427		48.22	2.60667		48.77	2.18797		68.7	1.09483		48.21	5.65924		48.85	4.15714		48.39	5.06923			68.58	0.922414		48.92	0.95		48.5	0.909774		48.2	1.18571		48.38	0.569231
49.02	5.36893		48.42	2.61667		49	2.20301		68.89	1.05172		48.48	5.65605		49.16	4.03571		48.61	4.94615			68.55	0.896552		49.15	0.913333		48.74	0.909774		48.37	1.07857		48.58	0.576923
49.15	5.57282		48.61	2.58333		49.1	2.24561		69.17	0.974138		48.75	5.64013		49.36	4.07857		48.85	4.99231			68.93	0.896552		49.29	0.903333		48.85	0.907268		48.61	1.12857		48.6	0.546154
49.27	5.56311		48.9	2.63333		49.37	2.28571		69.32	0.931034		48.81	5.66242		49.49	4.15		48.9	4.96923			69.17	0.818966		49.55	0.916667		49.13	0.869674		48.71	1.08571		48.95	0.523077
49.55	5.71845		49.1	2.55667		49.42	2.2807		69.54	0.844828		49.02	5.60828		49.59	3.97143		49.23	4.93077			69.36	0.87931		49.74	0.91		49.25	0.869674		48.97	1.08571		49.08	0.538462
49.77	5.51456		49.22	2.58667		49.72	2.3208		69.85	0.827586		49.29	5.6242		49.9	3.97857		49.31	4.93077			69.37	0.844828		49.99	0.886667		49.45	0.849624		49.17	1.05714		49.37	0.546154
49.97	5.6699		49.42	2.57333		49.99	2.33835		69.93	0.810345		49.43	5.6051		50.06	3.99286		49.64	4.95385			69.71	0.853448		50.19	0.883333		49.64	0.83208		49.42	1.00714		49.55	0.515385
50.2	5.63107		49.6	2.48		50.07	2.34837		70.18	0.818966		49.69	5.5828		50.29	3.97143		49.81	4.87692			69.68	0.836207		50.31	0.886667		49.86	0.864662		49.86	1.02143		49.71	0.538462
50.34	5.72816		49.75	2.56333		50.28	2.37594		70.3	0.732759		49.85	5.57643		50.49	3.85714		49.95	5			69.95	0.844828		50.51	0.873333		50.07	0.844612		49.99	1.05		49.97	0.530769
50.61	5.76699		49.94	2.52667		50.56	2.39599		70.52	0.775862		49.97	5.54777		50.66	3.87143		50.13	4.77692			70.39	0.793103		50.75	0.863333		50.19	0.829574		50.02	1.07143		50.12	0.538462
50.74	5.7767		50.12	2.53		50.81	2.42607		70.71	0.715517		50.29	5.50637		50.85	3.87143		50.34	4.83846			70.38	0.784483		50.88	0.87		50.42	0.837093		50.29	0.928571		50.39	0.530769
50.94	5.8835		50.41	2.44		50.95	2.45363		70.93	0.681034		50.6	5.54777		51.02	3.84286		50.69	4.82308			70.51	0.758621		51.14	0.876667		50.56	0.799499		50.52	0.971429		50.6	0.492308
51.18	5.80583		50.54	2.45		51.09	2.45113		71.23	0.594828		50.68	5.46497		51.21	3.79286		50.82	4.83846			70.78	0.741379		51.28	0.876667		50.73	0.802005		50.63	0.9		50.73	0.523077
51.38	6.00971		50.79	2.45		51.38	2.4812		71.36	0.663793		50.88	5.43631		51.44	3.65		51.12	4.76923			71.2	0.75		51.49	0.88		50.98	0.809524		50.79	0.964286		50.93	0.515385
51.56	6.01942		51.03	2.45		51.59	2.50877		71.52	0.612069		51.09	5.44586		51.56	3.70714		51.09	4.69231			71.27	0.75		51.67	0.866667		51.24	0.824561		50.92	0.885714		51.11	0.530769
51.71	5.8932		51.23	2.43333		51.71	2.51378		71.67	0.594828		51.28	5.41401		51.81	3.70714		51.31	4.64615			71.13	0.698276		51.87	0.853333		51.36	0.817043		51.13	0.892857		51.33	0.515385
52.01	6.1068		51.42	2.37		52.01	2.55388		71.95	0.586207		51.53	5.35032		52	3.62143		51.49	4.5			71.57	0.767241		52.14	0.846667		51.63	0.774436		51.42	0.9		51.56	0.476923
52.11	6.02913		51.63	2.34667		52.18	2.5614		72.13	0.560345		51.7	5.34076		52.2	3.55		51.86	4.5			71.5	0.732759		52.27	0.85		51.89	0.796992		51.56	0.857143		51.66	0.546154
52.36	5.87379		51.78	2.28667		52.28	2.599		72.31	0.543103		51.85	5.30573		52.45	3.54286		52.02	4.59231			71.8	0.75		52.49	0.856667		52.06	0.794486		51.81	0.871429		51.95	0.492308
52.56	6.07767		52.03	2.32		52.53	2.62406		72.46	0.508621		52.03	5.2707		52.58	3.45		52.38	4.55385			72.06	0.715517		52.69	0.863333		52.29	0.789474		51.96	0.85		52.1	0.515385
52.77	6		52.17	2.27667		52.64	2.59148		72.7	0.534483		52.23	5.25159		52.85	3.38571		52.53	4.47692			72.41	0.75		52.94	0.84		52.47	0.781955		52.09	0.814286		52.33	0.5
52.99	6.09709		52.36	2.25		52.92	2.66917		72.85	0.5		52.53	5.21656		52.96	3.32143		52.77	4.49231			72.42	0.724138		53.13	0.853333		52.63	0.766917		52.36	0.821429		52.46	0.492308
53.11	6.02913		52.59	2.22		53.11	2.65664		72.99	0.5		52.58	5.18471		53.14	3.37143		52.87	4.39231			72.51	0.741379		53.31	0.843333		52.87	0.789474		52.49	0.864286		52.73	0.523077
53.38	6.08738		52.73	2.18		53.28	2.69925		73.25	0.508621		52.77	5.17197		53.31	3.27143		53.08	4.36923			72.87	0.706897		53.46	0.873333		53.1	0.814536		52.85	0.814286		52.99	0.492308
53.52	6.08738		52.99	2.12667		53.49	2.6792		73.47	0.482759		53.06	5.10191		53.55	3.27143		53.31	4.47692			73.13	0.758621		53.69	0.88		53.22	0.786967		52.99	0.807143		53.22	0.446154
53.74	6.23301		53.13	2.12333		53.76	2.7193		73.72	0.456897		53.17	5.10828		53.78	3.2		53.55	4.26154			73.1	0.741379		53.89	0.87		53.46	0.774436		53.22	0.821429		53.31	0.492308
53.99	6.05825		53.35	2.07		53.99	2.74937		73.79	0.439655		53.38	5.02548		53.95	3.2		53.6	4.20769			73.39	0.715517		54.02	0.84		53.55	0.786967		53.33	0.785714		53.59	0.492308
54.2	6.00971		53.48	2.07		54.16	2.71429		73.97	0.482759		53.61	5.00955		54.16	3.02143		53.78	4.16154			73.58	0.724138		54.29	0.886667		53.77	0.786967		53.56	0.8		53.74	0.507692
54.35	6.07767		53.82	2.00667		54.32	2.7995		74.26	0.422414		53.87	4.89809		54.37	3.06429		53.92	4.15385			73.6	0.767241		54.44	0.863333		54.02	0.81203		53.79	0.771429		54	0.492308
54.6	6.04854		53.96	2		54.49	2.75188		74.4	0.37931		54.02	4.90764		54.5	2.92143		54.14	4.17692			73.99	0.75		54.58	0.873333		54.22	0.814536		53.92	0.714286		54.09	0.476923
54.83	6.01942		54.2	1.89667		54.77	2.78446		74.67	0.439655		54.25	4.90764		54.79	2.95714		54.49	4.16154			74.35	0.689655		54.82	0.896667		54.39	0.807018		54.16	0.757143		54.31	0.492308
54.91	6.04854		54.33	1.89		54.9	2.81203		74.8	0.405172		54.45	4.86943		54.98	2.85714		54.51	4.1			74.38	0.655172		55	0.916667		54.56	0.796992		54.37	0.757143		54.6	0.523077
55.13	6.03883		54.55	1.82667		55.2	2.81454		75.07	0.413793		54.63	4.76752		55.15	2.8		54.68	3.98462			74.65	0.655172		55.21	0.903333		54.84	0.809524		54.57	0.764286		54.72	0.530769
55.28	6.01942		54.8	1.83		55.36	2.82206		75.24	0.387931		54.82	4.73248		55.34	2.72857		54.83	3.92308			74.97	0.594828		55.39	0.896667		55.02	0.804511		54.8	0.7		54.91	0.530769
55.55	5.97087		54.96	1.79		55.54	2.85213		75.44	0.396552		54.95	4.69745		55.55	2.65		55.19	3.89231			75.06	0.62069		55.64	0.923333		55.2	0.81203		55	0.728571		55.19	0.5
55.83	5.99029		55.17	1.75667		55.76	2.84211		75.63	0.353448		55.22	4.6051		55.79	2.66429		55.31	3.85385			75.32	0.594828		55.9	0.93		55.43	0.814536		55.15	0.707143		55.45	0.538462
55.92	5.86408		55.38	1.67		56.02	2.85965		75.8	0.362069		55.36	4.55414		55.92	2.65		55.61	3.81538			75.38	0.560345		56.05	0.923333		55.67	0.869674		55.33	0.742857		55.6	0.469231
56.15	6		55.67	1.67667		56.17	2.89474		76.03	0.362069		55.6	4.54777		56.18	2.61429		55.76	3.8			75.59	0.534483		56.2	0.936667		55.83	0.844612		55.59	0.721429		55.89	0.484615
56.34	5.90291		55.77	1.62		56.3	2.8797		76.29	0.37069		55.7	4.5414		56.32	2.53571		55.89	3.77692			75.85	0.534483		56.36	0.953333		56.02	0.854637		55.74	0.7		55.98	0.492308
56.56	5.90291		55.98	1.56333		56.52	2.84211		76.42	0.353448		55.99	4.42038		56.56	2.46429		56.1	3.67692			76.22	0.543103		56.61	0.96		56.19	0.894737		55.95	0.678571		56.27	0.476923
56.66	5.84466		56.19	1.53333		56.71	2.88471		76.65	0.353448		56.17	4.35032		56.82	2.44286		56.33	3.68462			76.27	0.543103		56.88	0.976667		56.43	0.892231		56.2	0.678571		56.35	0.507692
56.9	5.7767		56.42	1.5		56.94	2.89724		76.81	0.37069		56.42	4.29936		56.97	2.42143		56.66	3.70769			76.51	0.5		57.04	1.01333		56.56	0.884712		56.32	0.728571		56.58	0.530769
57.12	5.79612		56.52	1.46667		57.08	2.8797		76.92	0.336207		56.67	4.23885		57.23	2.35		56.79	3.56923			76.73	0.517241		57.23	0.98		56.74	0.899749		56.58	0.728571		56.71	0.507692
57.38	5.68932		56.77	1.44667		57.3	2.89975		77.17	0.344828		56.69	4.24841		57.38	2.28571		56.92	3.56923			76.85	0.474138		57.43	0.993333		56.92	0.894737		56.78	0.664286		57.02	0.530769
57.54	5.54369		57.02	1.36667		57.52	2.88972		77.43	0.344828		57.02	4.16561		57.58	2.18571		57.18	3.45385			76.95	0.439655		57.67	1		57.2	0.912281		56.89	0.714286		57.2	0.538462
57.77	5.56311		57.15	1.37		57.62	2.87719		77.54	0.344828		57.2	4.11146		57.84	2.14286		57.51	3.41538			77.4	0.439655		57.84	1.05333		57.4	0.924812		57.08	0.714286		57.35	0.569231
57.89	5.49515		57.42	1.35333		57.86	2.88972		77.81	0.318966		57.4	4.04777		58.06	2.22857		57.48	3.51538			77.59	0.413793		58.07	1.02		57.59	0.934837		57.35	0.678571		57.67	0.553846
58.16	5.46602		57.56	1.26667		58.05	2.89223		78.02	0.362069		57.56	3.99682		58.24	2.07143		57.84	3.40769			77.79	0.448276		58.3	1.08		57.84	0.944862		57.53	0.707143		57.74	0.530769
58.36	5.42718		57.78	1.26		58.22	2.86717		78.19	0.336207		57.81	3.94904		58.43	2.06429		58.05	3.43077			77.8	0.448276		58.51	1.07667		57.96	0.947368		57.74	0.657143		57.95	0.576923
58.51	5.28155		57.98	1.21667		58.53	2.85714		78.47	0.310345		58.02	3.8949		58.76	2.06429		58.2	3.26923			78.24	0.387931		58.69	1.04667		58.2	1.00251		57.9	0.678571		58.15	0.515385
58.66	5.15534		58.1	1.19667		58.64	2.83459					58.15	3.82484		58.84	1.95714		58.43	3.23846						58.87	1.08333		58.38	0.972431		58.07	0.707143		58.32	0.553846
58.89	5		58.26	1.17		58.92	2.80952					58.44	3.73248		59.1	1.92143		58.44	3.27692						59.07	1.08667		58.61	1.01754		58.35	0.65		58.42	0.553846
59.17	5.09709		58.56	1.14		59.11	2.81203					58.61	3.70382		59.26	1.9		58.66	3.12308						59.27	1.06333		58.79	1.00251		58.58	0.678571		58.71	0.584615
59.25	4.8932		58.79	1.11333		59.29	2.76441					58.77	3.63376		59.43	1.77143		58.94	3.06154						59.38	1.06667		59.02	1.02005		58.69	0.685714		58.97	0.592308
59.52	4.84466		58.92	1.06		59.52	2.78195					59.03	3.56369		59.6	1.80714		59.11	3.01538						59.61	1.12333		59.2	1.02506		58.88	0.678571		59.13	0.553846
59.67	4.68932		59.17	1.05667		59.67	2.74436					59.17	3.53503		59.82	1.68571		59.23	2.97692						59.88	1.14		59.44	1.03008		59.03	0.742857		59.28	0.6
59.88	4.64078		59.31	1.02		59.88	2.75689					59.41	3.43949		60.04	1.67143		59.49	2.84615						60.08	1.13333		59.62	1.04261		59.26	0.728571		59.46	0.576923
60.1	4.64078		59.55	1.02		60.06	2.69925					59.54	3.41083		60.12	1.69286		59.77	2.82308						60.26	1.16		59.7	1.06767		59.51	0.707143		59.67	0.6
60.27	4.42718		59.75	0.983333		60.35	2.6792					59.78	3.35669		60.39	1.6		59.82	2.81538						60.42	1.15		59.98	1.03759		59.67	0.692857		59.81	0.615385
60.53	4.43689		59.94	0.976667		60.48	2.64662					59.93	3.24522		60.63	1.52143		60.06	2.73846						60.65	1.18		60.17	1.06266		60.12	0.685714		60.13	0.638462
60.68	4.31068		60.13	0.966667		60.74	2.60902					60.24	3.21019		60.78	1.5		60.21	2.63846						60.84	1.15		60.37	1.06767		60.27	0.735714		60.32	0.630769
60.91	4.25243		60.39	0.95		60.91	2.60652					60.42	3.08917		60.97	1.46429		60.58	2.64615						61.02	1.18333		60.53	1.10025		60.45	0.728571		60.52	0.646154
61.07	4.20388		60.58	0.936667		61.07	2.57644					60.71	3.11783		61.2	1.42857		60.65	2.54615						61.25	1.17667		60.79	1.08521		60.67	0.685714		60.77	0.646154
61.31	4.09709		60.76	0.916667		61.32	2.52632					60.85	3.01911		61.41	1.34286		60.91	2.56154						61.39	1.15667		61.02	1.06767		60.93	0.7		60.94	0.630769
61.55	4.00971		60.91	0.923333		61.51	2.50376					61.04	2.98408		61.47	1.33571		61.2	2.47692						61.62	1.19667		61.14	1.09023		60.98	0.692857		61	0.638462
61.62	3.91262		61.13	0.88		61.72	2.45614					61.33	2.85987		61.75	1.26429		61.2	2.45385						61.78	1.15		61.38	1.10025		61.31	0.735714		61.32	0.676923
61.9	3.79612		61.38	0.866667		61.8	2.41604					61.51	2.84076		61.88	1.25		61.43	2.37692						62.03	1.15333		61.52	1.09273		61.42	0.75		61.49	0.676923
62.09	3.65049		61.61	0.84		62.06	2.38095					61.7	2.7707		62.15	1.2		61.64	2.26923						62.22	1.18		61.77	1.10526		61.54	0.721429		61.76	0.669231
62.21	3.63107		61.67	0.85		62.27	2.37093					61.86	2.63376		62.37	1.13571		61.93	2.20769						62.39	1.19		61.98	1.0802		61.76	0.714286		61.86	0.684615
62.48	3.56311		61.86	0.853333		62.43	2.3208					61.93	2.60191		62.58	1.11429		62.27	2.18462						62.59	1.21		62.14	1.1203		61.96	0.742857		62.12	0.684615
62.72	3.38835		62.08	0.826667		62.66	2.23559					62.21	2.57006		62.7	1.15		62.51	2.20769						62.85	1.15667		62.37	1.09273		62.17	0.707143		62.38	0.692308
62.91	3.39806		62.31	0.83		62.82	2.21554					62.39	2.46497		62.92	1.04286		62.74	2.09231						63.05	1.17333		62.56	1.11028		62.35	0.728571		62.43	0.7
63.05	3.1165		62.56	0.81		63.08	2.16291					62.54	2.41401		63.14	1		62.98	1.99231						63.22	1.18333		62.74	1.10777		62.56	0.771429		62.74	0.715385
63.27	3.1165		62.71	0.823333		63.24	2.11779					62.79	2.35987		63.35	0.992857		63.1	1.91538						63.49	1.18		62.96	1.08772		62.67	0.728571		62.88	0.730769
63.47	2.99029		63.01	0.806667		63.32	2.10276					62.95	2.30892		63.55	0.95		63.22	1.87692						63.59	1.17667		63.1	1.08772		62.91	0.721429		63.13	0.730769
63.7	2.96117		63.14	0.826667		63.69	2.05263					63.14	2.25478		63.72	0.892857		63.41	1.79231						63.84	1.19667		63.35	1.0802		63.06	0.75		63.38	0.769231
63.85	2.94175		63.35	0.77		63.81	1.9599					63.39	2.16879		63.95	0.907143		63.8	1.71538						64.02	1.14333		63.6	1.08521		63.35	0.75		63.5	0.753846
64.06	2.84466		63.55	0.78		64.06	1.95739					63.57	2.1242		64.14	0.835714		63.74	1.66923						64.26	1.18667		63.8	1.07018		63.47	0.757143		63.69	0.769231
64.29	2.85437		63.71	0.8		64.17	1.88972					63.77	2.09236		64.34	0.8		63.93	1.62308						64.39	1.14667		63.98	1.10025		63.79	0.721429		63.9	0.792308
64.46	2.58252		63.88	0.78		64.39	1.86717					63.98	2.01911		64.54	0.771429		64.14	1.63846						64.64	1.13333		64.14	1.04762		64.01	0.785714		64.13	0.830769
64.66	2.59223		64.19	0.783333		64.68	1.81955					64.11	1.94268		64.74	0.742857		64.35	1.51538						64.85	1.17		64.38	1.07268		64.04	0.778571		64.27	0.746154
64.88	2.5534		64.31	0.79		64.8	1.77444					64.45	1.88854		64.95	0.735714		64.56	1.48462						64.99	1.17		64.56	1.07018		64.31	0.742857		64.51	0.753846
65.08	2.51456		64.48	0.753333		65.03	1.73935					64.58	1.86306		65.13	0.685714		64.71	1.37692						65.17	1.11667		64.77	1.07769		64.49	0.778571		64.63	0.753846
65.27	2.42718		64.66	0.803333		65.29	1.70175					64.77	1.80892		65.31	0.65		64.95	1.32308						65.38	1.17		64.95	1.09273		64.69	0.742857		64.88	0.746154
65.49	2.38835		64.88	0.763333		65.45	1.63158					64.91	1.72611		65.55	0.65		65.03	1.36154						65.6	1.11333		65.14	1.07769		64.85	0.721429		65.08	0.753846
65.7	2.32039		65.04	0.78		65.67	1.57393					65.13	1.71019		65.75	0.607143		65.33	1.26923						65.78	1.11667		65.33	1.0802		65.1	0.742857		65.22	0.792308
65.9	2.20388		65.27	0.793333		65.86	1.54637					65.38	1.63376		65.88	0.585714		65.4	1.22308						66.02	1.12667		65.53	1.00752		65.32	0.707143		65.45	0.8
66.04	2.15534		65.55	0.77		66.02	1.49373					65.59	1.6051		66.17	0.6		65.61	1.2						66.17	1.06667		65.77	1.07268		65.46	0.721429		65.75	0.761538
66.23	2.04854		65.7	0.746667		66.27	1.43358					65.78	1.52548		66.36	0.564286		65.93	1.12308						66.35	1.07667		65.94	1.06015		65.7	0.721429		65.93	0.792308
66.44	2.00971		65.94	0.78		66.44	1.44361					65.99	1.48089		66.56	0.578571		66.17	1.06923						66.52	1.06		66.14	1.03759		65.93	0.735714		66.12	0.746154
66.64	2.04854		66.05	0.763333		66.67	1.34586					66.17	1.45223		66.74	0.521429		66.33	1.04615						66.71	1.06		66.28	1.03509		66.07	0.735714		66.35	0.746154
66.92	1.86408		66.35	0.773333		66.88	1.3183					66.31	1.37261		66.98	0.557143		66.42	1.00769						66.96	1.01667		66.55	1.03008		66.28	0.742857		66.64	0.761538
67.04	1.87379		66.46	0.776667		67.06	1.2782					66.55	1.36306		67.13	0.5		66.78	0.992308						67.14	1.01667		66.74	1.03509		66.57	0.75		66.85	0.738462
67.24	1.79612		66.71	0.783333		67.32	1.2381					66.74	1.31847		67.35	0.492857		66.97	0.992308						67.42	1.01		66.95	1.02256		66.77	0.764286		67.02	0.761538
67.45	1.86408		66.85	0.78		67.46	1.19048					66.92	1.32484		67.49	0.478571		67.16	0.923077						67.63	0.99		67.11	0.987469		66.9	0.757143		67.13	0.746154
67.64	1.73786		67.09	0.746667		67.64	1.18045					67.1	1.24522		67.67	0.45		67.22	0.907692						67.75	0.956667		67.35	0.984962		67.05	0.714286		67.35	0.8
67.85	1.69903		67.31	0.753333		67.83	1.13283					67.3	1.21019		67.88	0.421429		67.45	0.930769						68.01	0.93		67.48	0.962406		67.24	0.721429		67.6	0.746154
67.99	1.61165		67.52	0.753333		68.03	1.07519					67.58	1.15605		68.23	0.421429		67.62	0.838462						68.13	0.906667		67.75	0.964912		67.48	0.707143		67.77	0.746154
68.27	1.66019		67.69	0.74		68.24	1.06767					67.67	1.10191		68.44	0.442857		67.85	0.807692						68.34	0.916667		67.96	0.969925		67.72	0.671429		67.95	0.723077
68.45	1.56311		67.89	0.746667		68.42	1.03258					67.88	1.10191		68.58	0.407143		68.03	0.815385						68.6	0.906667		68.15	0.944862		67.85	0.707143		68.1	0.769231
68.64	1.5534		68.1	0.736667		68.64	0.987469					68.2	1.07325		68.82	0.392857		68.27	0.784615						68.77	0.883333		68.27	0.934837		67.99	0.721429		68.31	0.746154
68.89	1.48544		68.24	0.736667		68.88	0.974937					68.34	1.03185		69.01	0.378571		68.55	0.792308						68.99	0.826667		68.5	0.912281		68.27	0.728571		68.42	0.753846
69.07	1.45631		68.52	0.72		69.03	0.954887					68.54	1.02548		69.17	0.378571		68.6	0.738462						69.17	0.82		68.71	0.902256		68.46	0.642857		68.77	0.723077
69.28	1.40777		68.68	0.703333		69.2	0.909774					68.77	0.971338		69.3	0.378571		68.92	0.723077						69.36	0.803333		68.9	0.902256		68.67	0.671429		68.84	0.676923
69.54	1.39806		68.95	0.74		69.37	0.899749					68.88	0.926752		69.5	0.357143		69.01	0.692308						69.57	0.82		69.13	0.899749		68.87	0.657143		69.06	0.692308
69.66	1.35922		69.13	0.723333		69.62	0.862155					69.15	0.920382		69.68	0.364286		69.28	0.676923						69.79	0.76		69.36	0.87218		69.1	0.7		69.2	0.7
69.8	1.28155		69.33	0.693333		69.83	0.83208					69.28	0.914013		69.93	0.357143		69.42	0.715385						69.98	0.746667		69.5	0.847118		69.27	0.65		69.4	0.707692
70.11	1.29126		69.48	0.706667		69.99	0.834586					69.55	0.904459		70.13	0.364286		69.73	0.669231						70.12	0.713333		69.73	0.879699		69.45	0.664286		69.6	0.723077
70.25	1.29126		69.73	0.66		70.22	0.81203					69.71	0.853503		70.28	0.342857		69.9	0.676923						70.34	0.7		69.9	0.847118		69.68	0.621429		69.81	0.661538
70.43	1.17476		69.93	0.673333		70.39	0.776942					70.06	0.83121		70.55	0.314286		70.15	0.607692						70.57	0.673333		70.05	0.834586		69.93	0.621429		69.98	0.707692
70.67	1.21359		70.09	0.673333		70.59	0.779449					70.27	0.828025		70.7	0.314286		70.31	0.653846						70.74	0.683333		70.31	0.81203		70.03	0.628571		70.14	0.738462
70.87	1.21359		70.31	0.676667		70.84	0.77193					70.49	0.792994		70.86	0.314286		70.52	0.592308						70.95	0.683333		70.46	0.81203		70.45	0.635714		70.43	0.661538
71.07	1.12621		70.49	0.683333		71.04	0.724311					70.63	0.799363		71.15	0.328571		70.67	0.630769						71.13	0.63		70.76	0.807018		70.5	0.621429		70.66	0.684615
71.28	1.09709		70.66	0.66		71.19	0.726817					70.85	0.748408		71.36	0.314286		71.01	0.6						71.32	0.623333		70.88	0.781955		70.7	0.614286		70.81	0.653846
71.48	1.09709		70.86	0.673333		71.37	0.704261					70.94	0.745223		71.5	0.328571		71.14	0.561538						71.5	0.586667		71.06	0.781955		71.06	0.585714		71.04	0.684615
71.6	1.03883		71.12	0.63		71.6	0.696742					71.17	0.713376		71.72	0.285714		71.38	0.6						71.67	0.593333		71.29	0.781955		71.14	0.571429		71.22	0.684615
71.83	1.01942		71.2	0.646667		71.85	0.669173					71.35	0.710191		71.92	0.328571		71.67	0.561538						71.92	0.566667		71.52	0.719298		71.28	0.607143		71.5	0.638462
72.02	1.01942		71.48	0.633333		72.05	0.654135					71.53	0.694268		72.07	0.292857		71.73	0.576923						72.13	0.546667		71.67	0.729323		71.6	0.564286		71.67	0.623077
72.18	0.980583		71.63	0.64		72.18	0.684211					71.78	0.687898		72.4	0.314286		71.86	0.569231						72.31	0.536667		71.92	0.711779		71.74	0.571429		71.85	0.646154
72.42	0.951456		71.82	0.64		72.35	0.616541					71.98	0.665605		72.62	0.271429		72.18	0.538462						72.49	0.54		72.11	0.709273		71.92	0.528571		71.99	0.592308
72.6	0.941748		72.03	0.636667		72.6	0.636591					72.1	0.656051		72.73	0.292857		72.34	0.507692						72.7	0.503333		72.28	0.679198		72.08	0.564286		72.2	0.584615
72.74	0.902913		72.26	0.65		72.74	0.651629					72.34	0.643312		72.9	0.3		72.53	0.530769						72.97	0.5		72.51	0.679198		72.32	0.521429		72.36	0.576923
73.01	0.902913		72.45	0.67		73.03	0.601504					72.53	0.61465		73.09	0.292857		72.67	0.523077						73.15	0.483333		72.73	0.684211		72.44	0.514286		72.59	0.576923
73.13	0.834951		72.63	0.666667		73.17	0.601504					72.7	0.60828		73.3	0.257143		72.97	0.553846						73.38	0.476667		72.87	0.656642		72.61	0.521429		72.78	0.553846
73.31	0.786408		72.88	0.663333		73.27	0.578947					72.9	0.633758		73.54	0.292857		73.06	0.576923						73.52	0.483333		73.09	0.634085		72.89	0.507143		73.01	0.576923
73.55	0.815534		73.13	0.666667		73.55	0.601504					73.15	0.570064		73.68	0.3		73.2	0.546154						73.76	0.463333		73.31	0.621554		73.09	0.464286		73.28	0.5
73.72	0.805825		73.25	0.653333		73.7	0.568922					73.31	0.544586		73.9	0.278571		73.49	0.484615						73.89	0.443333		73.49	0.619048		73.18	0.507143		73.38	0.5
74	0.786408		73.45	0.66		73.94	0.556391					73.46	0.576433		74.1	0.271429		73.77	0.484615						74.13	0.426667		73.66	0.62406		73.47	0.485714		73.62	0.546154
74.18	0.776699		73.64	0.693333		74.18	0.581454					73.72	0.538217		74.27	0.292857		73.92	0.5						74.31	0.413333		73.9	0.578947		73.64	0.471429		73.74	0.507692
74.33	0.737864		73.88	0.69		74.44	0.54386					73.99	0.528662		74.44	0.271429		73.96	0.5						74.56	0.43		74.16	0.591479		73.76	0.471429		73.99	0.484615
74.55	0.757282		74.02	0.693333		74.57	0.541353					74.02	0.522293		74.7	0.257143		74.16	0.484615						74.69	0.413333		74.28	0.553885		74	0.45		74.24	0.515385
74.8	0.718447		74.24	0.72		74.72	0.551378					74.26	0.496815		74.85	0.278571		74.41	0.446154						74.95	0.386667		74.48	0.553885		74.19	0.407143		74.43	0.492308
75	0.679612		74.44	0.693333		74.99	0.521303					74.52	0.490446		75.01	0.278571		74.6	0.476923						75.13	0.403333		74.67	0.521303		74.44	0.442857		74.64	0.476923
75.21	0.728155		74.71	0.696667		75.13	0.528822					74.74	0.484076		75.28	0.257143		74.81	0.507692						75.31	0.383333		74.8	0.516291		74.63	0.407143		74.8	0.484615
75.35	0.68932		74.93	0.696667		75.36	0.506266					74.93	0.455414		75.44	0.264286		75.06	0.446154						75.55	0.393333		75.07	0.483709		74.77	0.421429		75.1	0.484615
75.62	0.708738		75.07	0.726667		75.57	0.511278					75.06	0.458599		75.52	0.242857		75.31	0.461538						75.68	0.39		75.24	0.511278		75.07	0.435714		75.24	0.461538
75.72	0.660194		75.23	0.72		75.77	0.518797					75.27	0.458599		75.93	0.25		75.45	0.538462						75.88	0.383333		75.45	0.471178		75.17	0.407143		75.36	0.461538
75.9	0.601942		75.4	0.73		75.98	0.491228					75.49	0.423567		76.01	0.257143		75.6	0.476923						76.03	0.373333		75.67	0.448622		75.45	0.414286		75.67	0.423077
76.17	0.660194		75.67	0.766667		76.11	0.501253					75.7	0.426752		76.28	0.242857		75.78	0.461538						76.32	0.363333		75.83	0.43609		75.64	0.392857		75.91	0.453846
76.39	0.660194		75.92	0.773333		76.35	0.503759					75.85	0.420382		76.51	0.214286		76.01	0.430769						76.53	0.38		76.06	0.406015		75.83	0.392857		76.06	0.392308
76.63	0.650485		76.04	0.793333		76.59	0.493734					75.99	0.407643		76.63	0.25		76.3	0.423077						76.7	0.37		76.24	0.408521		76.06	0.385714		76.21	0.407692
76.76	0.640777		76.22	0.796667		76.81	0.498747					76.28	0.401274		76.88	0.25		76.4	0.423077						76.89	0.38		76.42	0.37594		76.26	0.428571		76.37	0.384615
77.02	0.640777		76.43	0.8		76.97	0.498747					76.48	0.38535		77.02	0.25		76.63	0.430769						77.12	0.37		76.6	0.363409		76.37	0.385714		76.62	0.369231
77.13	0.679612		76.6	0.843333		77.14	0.483709					76.66	0.378981		77.21	0.221429		76.89	0.415385						77.26	0.366667		76.84	0.345865		76.56	0.407143		76.9	0.338462
77.41	0.660194		76.78	0.843333		77.35	0.488722					76.84	0.378981		77.45	0.242857		76.92	0.407692						77.45	0.376667		77.02	0.345865		76.89	0.392857		77.12	0.346154
77.55	0.68932		76.99	0.863333		77.55	0.506266					77.1	0.363057		77.65	0.257143		77.32	0.4						77.73	0.39		77.23	0.350877		77.02	0.392857		77.35	0.392308
77.71	0.679612		77.25	0.873333		77.71	0.488722					77.31	0.366242		77.85	0.235714		77.51	0.384615						77.91	0.366667		77.34	0.343358		77.2	0.407143		77.53	0.353846
77.99	0.68932		77.41	0.936667		77.95	0.47619					77.56	0.33121		78.13	0.264286		77.57	0.4						78.1	0.393333		77.65	0.338346		77.4	0.414286		77.76	0.338462
78.19	0.669903		77.62	0.92		78.1	0.481203					77.69	0.343949		78.4	0.25		77.92	0.369231						78.27	0.383333		77.8	0.323308		77.56	0.407143		77.92	0.323077
78.42	0.660194		77.91	0.94								77.93	0.340764		78.52	0.235714		77.99	0.353846						78.45	0.406667		77.98			77.85	0.392857		78.06	0.323077
78.6	0.650485		78.08	0.946667																					78.74	0.373333
78.74	0.699029		78.22	0.986667																					78.85	0.413333
78.99	0.660194		78.44	0.973333																					79.11	0.416667
79.17	0.679612		78.67	1.03333																					79.26	0.403333
79.38	0.699029																								79.45
