# Supplementary material for: Impact of energy limitations on function and resilience in long-wavelength Photosystem II
Source: eLife. 2022 Jul 19;11:e79890. doi: 10.7554/eLife.79890 (PMC9439682; doi:10.7554/eLife.79890)
Supplement: Figure 5—figure supplement 2—source data 1. [file elife-79890-fig5-figsupp2-data1.xlsx]

## Sheet: Thermoluminescence 
Synechocystis
	S2QB-			S2QA- (DCMU)
-19.83	5		-19.68	9
-19.79	5		-19.64	7
-19.81	6		-19.77	8
-19.79	5		-19.81	8
-19.79	6		-19.69	7
-19.9	6		-19.76	10
-19.83	5		-19.8	8
-19.8	6		-19.77	7
-19.68	4		-19.55	7
-19.62	5		-19.57	8
-19.56	6		-19.47	10
-19.44	5		-19.4	7
-19.3	5		-19.15	7
-19.04	5		-18.99	7
-18.83	5		-18.74	10
-18.82	5		-18.58	8
-18.5	5		-18.42	8
-18.35	7		-18.29	9
-18.15	5		-17.98	10
-17.91	6		-17.86	7
-17.73	5		-17.58	8
-17.51	6		-17.4	8
-17.32	5		-17.18	8
-17.12	6		-16.93	8
-16.9	6		-16.71	9
-16.65	5		-16.43	8
-16.44	6		-16.38	8
-16.27	5		-16.15	10
-16.04	5		-15.93	9
-15.85	7		-15.79	9
-15.65	5		-15.54	9
-15.51	5		-15.33	8
-15.24	5		-15.16	9
-15.15	5		-14.94	9
-14.9	5		-14.7	7
-14.66	6		-14.53	9
-14.45	6		-14.43	8
-14.2	6		-14.14	10
-14.1	5		-13.97	8
-13.75	6		-13.8	9
-13.67	6		-13.5	9
-13.49	6		-13.34	8
-13.33	5		-13.13	9
-13.01	7		-12.89	10
-12.81	6		-12.72	10
-12.73	5		-12.65	10
-12.51	7		-12.36	10
-12.25	5		-12.2	9
-12.08	6		-12.01	9
-11.85	6		-11.73	8
-11.68	5		-11.48	10
-11.48	5		-11.46	8
-11.33	5		-11.12	10
-11.1	6		-10.94	10
-10.9	5		-10.59	10
-10.62	5		-10.54	9
-10.51	6		-10.22	10
-10.23	6		-10.14	10
-10.04	6		-9.94	11
-9.82	5		-9.75	10
-9.66	5		-9.41	10
-9.41	5		-9.25	10
-9.29	6		-9.15	10
-8.99	6		-8.91	10
-8.83	6		-8.68	10
-8.61	5		-8.53	11
-8.44	6		-8.4	12
-8.35	5		-8.17	10
-7.98	5		-7.92	12
-7.84	6		-7.73	11
-7.7	6		-7.44	11
-7.42	6		-7.33	11
-7.19	6		-7.12	10
-7.14	6		-6.85	11
-6.81	6		-6.66	11
-6.62	6		-6.4	11
-6.4	6		-6.1	12
-6.26	6		-6.12	11
-6.02	6		-5.89	10
-5.81	7		-5.65	11
-5.51	6		-5.46	12
-5.49	5		-5.33	12
-5.23	7		-5.04	13
-4.99	6		-4.97	13
-4.74	6		-4.75	12
-4.55	6		-4.46	12
-4.28	7		-4.28	12
-4.28	6		-4.12	13
-4.05	6		-3.77	15
-3.77	6		-3.61	16
-3.58	7		-3.44	14
-3.48	5		-3.26	13
-3.2	6		-3.05	14
-3.04	7		-2.78	13
-2.86	5		-2.57	15
-2.6	7		-2.37	15
-2.35	6		-2.23	14
-2.29	5		-1.97	15
-1.96	7		-1.86	14
-1.78	6		-1.62	14
-1.48	7		-1.43	15
-1.41	6		-1.37	15
-1.26	7		-1.03	16
-1.01	6		-0.96	17
-0.77	5		-0.57	15
-0.52	6		-0.47	16
-0.41	7		-0.3	17
-0.13	6		-0.02	15
0.15	7		0.17	15
0.25	6		0.32	15
0.39	6		0.51	19
0.7	7		0.74	15
0.8	6		1.02	18
1.1	6		1.19	18
1.37	6		1.35	15
1.52	6		1.6	18
1.64	6		1.84	17
1.81	8		2.09	21
1.91	6		2.29	22
2.19	7		2.42	18
2.48	6		2.67	22
2.75	7		2.91	21
2.93	7		3.03	22
3.13	7		3.16	22
3.4	7		3.35	20
3.51	7		3.61	24
3.57	8		3.88	24
3.81	7		4.01	22
4.09	7		4.31	26
4.34	8		4.43	27
4.5	7		4.6	28
4.68	9		4.81	26
4.97	7		5.1	30
5.03	8		5.38	30
5.23	8		5.44	29
5.48	9		5.56	30
5.69	8		5.83	30
5.89	8		5.98	33
6.17	7		6.13	32
6.35	8		6.54	35
6.5	9		6.74	30
6.74	7		6.91	34
6.97	8		7.06	33
7.08	7		7.17	38
7.31	8		7.52	39
7.52	7		7.69	37
7.75	9		7.98	40
7.92	9		8.09	38
8.13	9		8.32	41
8.36	10		8.63	40
8.6	10		8.71	42
8.66	10		8.8	41
8.9	10		9.06	45
9.1	10		9.17	41
9.37	8		9.64	46
9.49	9		9.69	45
9.74	11		9.99	45
9.94	10		10.09	46
10.02	11		10.23	46
10.3	11		10.42	49
10.57	9		10.68	51
10.72	11		10.94	49
10.95	11		11.08	48
11.13	11		11.27	52
11.34	10		11.53	54
11.6	9		11.58	50
11.67	11		11.85	52
11.87	9		11.93	54
12.11	11		12.27	54
12.35	10		12.39	54
12.6	11		12.76	51
12.78	13		12.89	54
12.99	11		13.13	55
13.1	11		13.32	58
13.38	11		13.44	56
13.55	11		13.81	58
13.81	12		13.87	56
13.89	12		14.07	60
14.1	12		14.43	57
14.31	12		14.47	64
14.49	12		14.78	61
14.74	13		14.97	54
14.95	11		14.97	62
15.21	13		15.35	63
15.45	11		15.56	69
15.53	12		15.74	62
15.67	12		15.81	68
15.88	11		16.2	64
16.13	12		16.23	62
16.39	12		16.49	66
16.55	13		16.59	68
16.7	15		16.85	68
16.92	12		17.05	69
17.13	14		17.31	66
17.4	14		17.48	63
17.61	13		17.63	66
17.76	12		17.92	68
18	13		18.04	68
18.17	15		18.31	72
18.42	13		18.55	67
18.53	13		18.7	69
18.76	14		18.88	67
18.97	15		19.16	74
19.19	13		19.38	73
19.36	15		19.43	70
19.64	15		19.79	70
19.75	14		19.9	68
19.86	14		20.06	72
20.15	15		20.26	74
20.39	14		20.56	75
20.66	15		20.79	74
20.81	15		20.81	75
21.02	16		21.09	72
21.2	15		21.25	72
21.44	15		21.44	74
21.63	13		21.77	71
21.77	17		21.89	74
21.96	16		22.1	71
22.12	17		22.26	72
22.41	16		22.55	73
22.51	15		22.76	72
22.67	16		22.94	73
22.96	17		23.11	70
23.27	16		23.27	76
23.41	18		23.55	72
23.61	15		23.78	75
23.72	17		23.92	77
23.99	16		24.03	74
24.26	18		24.38	69
24.35	17		24.49	72
24.55	19		24.73	73
24.74	16		24.93	69
25.04	17		25.11	75
25.18	16		25.33	69
25.31	17		25.58	72
25.6	16		25.74	76
25.81	18		25.95	76
25.96	20		26.17	71
26.2	18		26.33	71
26.35	18		26.62	71
26.61	18		26.77	70
26.76	19		26.85	69
27.01	19		27.12	69
27.11	18		27.27	76
27.41	18		27.44	70
27.65	19		27.67	70
27.79	18		27.8	70
28	19		28.06	63
28.29	20		28.3	62
28.42	22		28.59	67
28.56	20		28.74	68
28.79	19		29.04	67
28.98	21		29.07	65
29.24	20		29.36	67
29.38	21		29.67	63
29.66	22		29.75	68
29.79	21		29.95	68
30.02	25		30.19	67
30.23	23		30.24	67
30.44	21		30.56	62
30.55	24		30.75	69
30.83	24		30.93	62
31.03	22		31.08	68
31.2	22		31.31	68
31.38	28		31.54	58
31.63	26		31.7	63
31.79	27		31.81	61
31.95	28		32.22	57
32.25	27		32.25	65
32.37	28		32.57	59
32.67	27		32.74	62
32.92	28		32.94	62
32.92	28		33.06	60
33.2	29		33.21	61
33.38	26		33.64	56
33.63	31		33.78	58
33.75	30		33.97	59
34.06	31		34.02	57
34.22	30		34.4	62
34.38	32		34.59	57
34.67	32		34.76	59
34.77	32		34.96	55
34.99	33		35.17	55
35.25	33		35.35	55
35.45	33		35.52	56
35.6	32		35.71	50
35.81	38		35.95	53
35.95	37		36.09	54
36.24	33		36.3	52
36.45	38		36.57	52
36.57	35		36.82	50
36.72	37		36.93	50
37	40		37.15	46
37.17	37		37.31	50
37.45	37		37.63	43
37.66	46		37.73	48
37.85	43		37.98	49
38	40		38.11	48
38.22	44		38.28	43
38.47	43		38.51	47
38.6	51		38.7	45
38.79	47		38.92	43
39.04	51		39.13	45
39.25	45		39.35	41
39.55	49		39.51	40
39.59	49		39.7	43
39.81	50		39.92	40
40.03	49		40.05	41
40.11	50		40.27	36
40.51	51		40.56	38
40.59	54		40.77	38
40.79	50		40.89	37
40.99	51		41.13	36
41.24	59		41.29	37
41.45	57		41.49	34
41.66	57		41.71	37
41.76	56		42	35
42.02	58		42.07	34
42.17	58		42.33	36
42.36	61		42.57	35
42.63	63		42.74	33
42.78	58		42.93	28
43.05	63		43.1	35
43.2	63		43.27	30
43.42	65		43.56	31
43.58	67		43.74	31
43.89	65		43.92	31
43.99	71		44.09	28
44.18	67		44.31	33
44.43	70		44.55	27
44.74	74		44.76	28
44.87	76		44.99	27
45.02	72		45.15	28
45.2	75		45.42	23
45.42	73		45.58	26
45.52	75		45.74	24
45.77	80		45.94	24
45.99	73		46.06	27
46.13	78		46.27	21
46.35	78		46.47	26
46.56	84		46.74	24
46.74	82		46.82	25
47.06	81		47.03	21
47.33	82		47.28	23
47.45	78		47.5	23
47.63	86		47.77	21
47.82	82		47.9	23
47.96	89		48.21	22
48.17	87		48.26	20
48.33	84		48.59	21
48.53	84		48.75	21
48.74	91		48.93	19
48.91	91		49.13	19
49.2	86		49.29	23
49.35	88		49.42	20
49.64	94		49.72	19
49.84	91		49.86	21
50.03	87		50.11	17
50.24	93		50.24	21
50.49	88		50.44	18
50.71	95		50.81	18
50.79	98		50.89	18
51.06	94		51.17	16
51.24	97		51.31	18
51.38	100		51.58	18
51.66	92		51.65	17
51.79	101		51.93	18
52	97		52.06	18
52.19	96		52.31	17
52.41	99		52.56	17
52.7	97		52.75	16
52.81	100		52.82	18
53.06	98		53.2	17
53.24	101		53.27	16
53.42	99		53.55	17
53.62	101		53.77	17
53.81	99		53.95	19
53.92	104		54.06	19
54.16	104		54.3	18
54.4	101		54.46	20
54.53	103		54.68	16
54.81	105		54.83	17
54.99	102		55.07	17
55.18	103		55.34	16
55.38	104		55.45	19
55.64	98		55.77	15
55.81	104		55.9	17
55.95	107		56.17	18
56.17	101		56.24	18
56.45	113		56.56	15
56.69	108		56.71	16
56.82	97		56.9	20
56.94	101		57.06	15
57.14	104		57.26	16
57.31	105		57.46	15
57.56	102		57.76	17
57.74	101		57.88	18
57.99	101		58.1	18
58.18	99		58.33	18
58.42	94		58.51	16
58.62	95		58.8	19
58.77	90		58.87	17
58.98	100		59.18	18
59.2	95		59.33	17
59.43	98		59.52	17
59.52	95		59.65	19
59.86	88		59.93	18
60	85		60.01	17
60.14	91		60.24	15
60.35	86		60.52	17
60.61	85		60.77	20
60.83	82		60.89	16
60.97	77		61.12	21
61.18	77		61.26	17
61.33	75		61.62	18
61.61	76		61.65	17
61.75	71		61.88	19
62.02	73		62	17
62.15	76		62.21	16
62.38	68		62.45	17
62.47	68		62.6	16
62.81	68		62.85	17
63.01	65		63.08	17
63.18	63		63.32	16
63.38	59		63.49	19
63.6	60		63.76	15
63.74	54		63.93	16
63.99	56		64.11	16
64.19	48		64.3	16
64.35	53		64.52	15
64.58	53		64.69	16
64.71	48		64.98	19
64.95	43		65.11	16
65.22	43		65.38	16
65.43	42		65.51	16
65.55	44		65.67	18
65.77	39		65.85	16
65.94	39		65.99	15
66.09	38		66.33	15
66.36	37		66.38	18
66.57	33		66.7	18
66.78	34		66.84	16
66.98	31		67.04	17
67.2	31		67.27	17
67.37	31		67.46	15
67.56	33		67.67	15
67.66	28		67.88	16
67.94	26		68.1	17
68.17	27		68.34	15
68.31	25		68.52	17
68.6	27		68.74	16
68.76	27		68.79	19
68.98	27		69.06	16
69.15	27		69.28	19
69.4	25		69.46	16
69.6	26		69.7	17
69.74	25		69.85	16
69.92	25		70.08	16
70.11	26		70.34	17
70.34	25		70.51	17
70.53	24		70.63	15
70.78	24		70.74	14
70.95	26		71.04	14
71.14	25		71.29	16
71.37	25		71.39	15
71.57	25		71.63	16
71.78	26		71.95	14
71.93	24		72.02	17
72.24	26		72.18	16
72.4	29		72.51	16
72.54	24		72.6	15
72.7	25		72.84	16
72.95	26		73.03	16
73.18	25		73.27	16
73.31	28		73.52	16
73.63	26		73.64	16
73.85	24		73.96	16
73.96	27		74.07	14
74.1	25		74.16	17
74.35	27		74.52	15
74.59	29		74.61	18
74.8	29		74.8	15
75.04	25		74.95	14
75.25	28		75.17	18
75.46	25		75.47	17
75.59	28		75.67	17
75.68	27		75.83	17
75.91	28		76.09	15
76.2	28		76.2	17
76.4	28		76.43	17
76.67	31		76.74	14
76.78	30		76.84	16
76.99	28		77.05	17
77.1	29		77.2	16
77.31	27		77.35	18
77.55	27		77.68	20
77.77	28		77.82	20
	31

## Sheet: Luminescence decay kinetics
Replicate 1					Replicate 2
ms	10°C	20°C	30°C		ms	10°C	20°C	30°C
570	244	521	844		570	615	808	1213
670	241	501	859		670	591	773	1220
770	228	498	817		770	507	704	1174
870	215	476	774		870	480	702	1137
970	205	462	745		970	429	650	1102
1070	188	455	721		1070	387	634	1068
1170	201	425	694		1170	359	592	1038
1270	185	412	654		1270	353	572	996
1370	185	388	641		1370	324	581	978
1470	176	411	627		1470	293	549	942
1570	164	384	607		1570	286	536	911
1670	164	374	595		1670	282	531	895
1770	171	365	567		1770	267	516	877
1870	160	362	547		1870	251	486	850
1970	153	346	541		1970	247	502	844
2070	158	351	521		2070	239	492	804
2170	157	344	505		2170	250	454	806
2270	147	324	494		2270	233	464	795
2370	158	321	491		2370	228	450	775
2470	153	319	458		2470	231	443	745
2570	157	307	456		2570	215	440	718
2670	146	303	443		2670	224	422	717
2770	142	307	426		2770	223	429	706
2870	134	296	429		2870	209	417	689
2970	143	283	413		2970	197	400	664
3070	125	292	406		3070	210	395	664
3170	135	276	388		3170	198	408	647
3270	143	283	381		3270	191	397	624
3370	129	264	379		3370	190	378	607
3470	132	263	377		3470	195	369	618
3570	130	258	367		3570	194	377	604
3670	130	252	352		3670	194	372	591
3770	128	240	349		3770	183	360	574
3870	130	257	349		3870	197	366	567
3970	121	240	339		3970	186	349	554
4070	122	243	327		4070	187	358	523
4170	124	249	312		4170	187	351	542
4270	117	229	307		4270	182	338	511
4370	125	225	303		4370	182	318	508
4470	114	225	306		4470	183	311	521
4570	119	229	299		4570	173	326	494
4670	117	216	297		4670	170	324	488
4770	119	220	271		4770	178	316	454
4870	117	215	262		4870	178	314	471
4970	119	220	270		4970	164	295	456
5070	121	209	267		5070	170	302	440
5170	115	206	272		5170	172	298	447
5270	107	191	261		5270	168	307	439
5370	112	205	254		5370	161	288	441
5470	112	211	249		5470	163	283	426
5570	108	201	244		5570	165	272	401
5670	106	192	254		5670	156	289	412
5770	103	174	248		5770	163	287	408
5870	108	192	245		5870	153	263	390
5970	119	183	239		5970	146	280	382
6070	102	186	219		6070	150	261	391
6170	103	182	215		6170	149	251	378
6270	93	171	211		6270	153	261	381
6370	100	185	226		6370	166	254	366
6470	97	178	222		6470	157	262	362
6570	96	175	211		6570	144	263	363
6670	102	169	205		6670	150	257	349
6770	99	170	203		6770	152	244	348
6870	93	163	208		6870	139	254	342
6970	104	159	195		6970	140	241	343
7070	97	164	200		7070	156	246	318
7170	92	157	192		7170	147	241	338
7270	91	151	190		7270	138	225	318
7370	98	157	191		7370	144	241	325
7470	88	157	185		7470	137	226	315
7570	93	143	186		7570	142	233	300
7670	95	152	185		7670	135	235	312
7770	86	153	171		7770	144	216	304
7870	88	150	171		7870	141	226	294
7970	91	142	175		7970	124	204	282
8070	86	147	168		8070	133	210	280
8170	83	143	166		8170	129	217	290
8270	88	139	165		8270	131	212	281
8370	85	139	167		8370	126	207	262
8470	90	130	165		8470	130	210	261
8570	81	135	159		8570	129	198	258
8670	85	137	158		8670	128	195	274
8770	84	131	159		8770	125	197	259
8870	80	134	152		8870	125	190	253
8970	87	140	151		8970	126	202	256
9070	78	136	150		9070	122	195	241
9170	83	120	142		9170	125	196	245
9270	89	120	143		9270	133	191	236
9370	83	123	148		9370	122	194	243
9470	86	115	151		9470	118	190	224
9570	80	119	147		9570	126	183	237
9670	75	121	139		9670	118	182	233
9770	81	112	131		9770	113	175	220
9870	79	118	127		9870	118	179	232
9970	79	111	136		9970	115	172	230
10070	70	113	134		10070	118	182	212
10170	77	123	119		10170	115	171	220
10270	79	113	120		10270	109	186	218
10370	80	109	121		10370	117	162	205
10470	73	114	123		10470	115	158	203
10570	68	101	120		10570	102	176	214
10670	72	106	133		10670	116	158	202
10770	74	102	123		10770	109	169	197
10870	75	110	116		10870	101	162	192
10970	83	113	118		10970	112	166	191
11070	71	109	108		11070	107	174	188
11170	71	105	110		11170	105	165	192
11270	71	100	112		11270	104	153	186
11370	65	100	114		11370	108	165	194
11470	65	91	104		11470	114	154	177
11570	70	94	101		11570	111	149	175
11670	71	99	107		11670	107	140	186
11770	64	102	108		11770	107	150	181
11870	66	100	100		11870	105	153	173
11970	69	94	110		11970	105	153	164
12070	71	97	97		12070	112	156	166
12170	65	98	95		12170	102	144	165
12270	65	95	100		12270	102	146	161
12370	61	98	102		12370	96	146	159
12470	69	98	94		12470	99	143	153
12570	63	92	95		12570	102	137	162
12670	62	86	86		12670	100	147	149
12770	70	91	93		12770	102	141	149
12870	72	92	88		12870	104	137	148
12970	62	89	91		12970	98	130	146
13070	60	87	95		13070	96	135	144
13170	66	85	86		13170	97	138	150
13270	61	85	87		13270	104	135	146
13370	63	86	88		13370	95	126	151
13470	55	80	82		13470	91	127	139
13570	60	85	81		13570	97	130	138
13670	57	82	76		13670	94	128	142
13770	60	86	78		13770	92	130	138
13870	60	81	82		13870	91	129	137
13970	62	77	87		13970	91	122	129
14070	60	82	74		14070	99	126	123
14170	63	85	75		14170	85	123	123
14270	58	75	80		14270	93	124	125
14370	55	80	76		14370	88	126	125
14470	57	75	84		14470	91	110	128
14570	60	74	76		14570	95	112	120
14670	60	76	75		14670	84	118	121
14770	54	75	77		14770	95	118	120
14870	53	75	76		14870	95	108	115
14970	56	79	76		14970	91	110	116
15070	58	71	68		15070	86	107	122
15170	59	79	68		15170	95	108	113
15270	59	69	69		15270	87	118	112
15370	61	73	72		15370	87	109	115
15470	53	72	67		15470	79	105	118
15570	52	65	65		15570	84	113	107
15670	55	70	64		15670	92	110	119
15770	53	71	65		15770	84	103	105
15870	55	58	61		15870	84	111	118
15970	54	66	62		15970	84	112	100
16070	48	72	66		16070	77	100	94
16170	53	64	65		16170	93	110	94
16270	55	63	59		16270	87	98	99
16370	55	67	62		16370	79	110	101
16470	46	63	58		16470	76	104	92
16570	53	62	61		16570	85	102	107
16670	52	67	58		16670	83	100	87
16770	50	67	65		16770	73	101	91
16870	49	62	58		16870	76	100	96
16970	52	61	56		16970	74	98	98
17070	51	66	52		17070	72	99	88
17170	46	65	55		17170	84	100	82
17270	48	62	52		17270	79	99	88
17370	47	64	52		17370	78	103	88
17470	44	63	54		17470	83	91	86
17570	50	65	57		17570	75	96	84
17670	45	59	55		17670	78	98	85
17770	48	61	55		17770	71	94	91
17870	46	62	49		17870	78	98	89
17970	49	60	49		17970	81	93	83
18070	46	54	51		18070	80	96	80
18170	48	61	48		18170	75	93	81
18270	50	53	49		18270	69	90	81
18370	51	58	48		18370	65	92	86
18470	51	54	50		18470	75	91	69
18570	46	57	51		18570	72	92	72
18670	43	55	45		18670	72	88	80
18770	47	57	51		18770	63	82	80
18870	48	58	46		18870	71	89	80
18970	41	58	52		18970	66	87	76
19070	48	52	40		19070	67	81	69
19170	45	65	49		19170	78	85	69
19270	50	55	43		19270	76	89	77
19370	45	57	42		19370	68	90	67
19470	48	53	40		19470	70	83	69
19570	43	51	41		19570	72	76	68
19670	38	50	48		19670	66	69	73
19770	43	56	45		19770	69	81	69
19870	44	49	38		19870	67	84	61
19970	41	51	42		19970	65	76	73
20070	38	49	37		20070	75	83	62
20170	44	49	35		20170	68	76	63
20270	47	49	39		20270	69	83	58
20370	41	53	38		20370	61	75	60
20470	44	50	40		20470	70	70	64
20570	48	50	40		20570	59	81	61
20670	46	51	38		20670	63	70	61
20770	45	51	43		20770	68	71	63
20870	48	46	37		20870	67	70	62
20970	47	52	36		20970	64	75	63
21070	41	46	37		21070	70	76	59
21170	39	46	34		21170	63	72	56
21270	45	44	36		21270	63	68	57
21370	40	51	38		21370	66	72	52
21470	38	47	33		21470	70	75	55
21570	43	50	38		21570	67	76	60
21670	38	44	41		21670	66	63	51
21770	41	46	38		21770	58	68	56
21870	39	42	31		21870	58	74	50
21970	39	44	36		21970	71	70	55
22070	38	44	35		22070	64	62	52
22170	38	43	38		22170	67	70	50
22270	40	42	34		22270	55	68	54
22370	42	41	28		22370	66	66	55
22470	40	42	29		22470	61	60	54
22570	40	47	32		22570	65	61	52
22670	40	41	31		22670	59	67	48
22770	39	45	29		22770	61	62	54
22870	38	47	33		22870	63	60	48
22970	38	43	30		22970	65	61	48
23070	35	38	29		23070	60	66	50
23170	38	45	31		23170	61	60	42
23270	36	40	32		23270	55	65	47
23370	37	40	34		23370	60	59	41
23470	37	43	30		23470	63	62	44
23570	38	41	32		23570	58	60	45
23670	37	45	25		23670	53	65	43
23770	39	37	26		23770	62	58	44
23870	41	40	28		23870	59	58	44
23970	35	40	28		23970	60	63	44
24070	38	36	31		24070	54	57	49
24170	33	37	28		24170	56	60	48
24270	37	41	30		24270	60	60	43
24370	38	38	27		24370	61	53	50
24470	33	37	28		24470	54	57	43
24570	32	43	27		24570	51	58	39
24670	36	40	23		24670	58	57	43
24770	31	39	24		24770	59	58	40
24870	33	38	27		24870	50	53	33
24970	39	37	23		24970	57	55	42
25070	34	35	22		25070	58	53	41
25170	36	41	25		25170	53	57	37
25270	33	32	24		25270	56	51	38
25370	33	40	25		25370	60	58	37
25470	36	38	22		25470	58	55	41
25570	36	37	28		25570	51	56	38
25670	33	34	18		25670	60	52	39
25770	37	41	25		25770	54	55	42
25870	33	38	24		25870	49	50	37
25970	38	36	27		25970	50	51	39
26070	38	30	23		26070	53	55	34
26170	32	32	22		26170	51	49	35
26270	32	35	23		26270	53	50	34
26370	34	36	21		26370	52	58	36
26470	34	30	24		26470	47	53	37
26570	32	32	23		26570	54	55	36
26670	35	33	22		26670	49	53	32
26770	35	33	20		26770	48	49	32
26870	31	29	23		26870	51	44	34
26970	35	28	19		26970	45	49	38
27070	32	36	22		27070	52	45	31
27170	32	35	19		27170	50	45	31
27270	31	34	23		27270	47	43	33
27370	31	34	23		27370	51	50	31
27470	34	32	23		27470	45	45	31
27570	34	33	19		27570	55	44	33
27670	34	29	22		27670	46	51	25
27770	25	33	19		27770	49	48	30
27870	30	33	18		27870	46	45	30
27970	32	29	19		27970	51	44	31
28070	33	29	21		28070	45	44	32
28170	32	33	20		28170	48	47	29
28270	33	31	17		28270	45	48	31
28370	28	27	20		28370	45	41	32
28470	28	32	20		28470	51	41	32
28570	31	32	20		28570	45	44	30
28670	31	30	22		28670	44	42	24
28770	30	28	20		28770	43	38	31
28870	28	30	20		28870	47	43	26
28970	29	28	18		28970	45	36	23
29070	33	33	18		29070	46	47	24
29170	30	27	17		29170	47	44	27
29270	30	28	18		29270	43	41	28
29370	29	28	17		29370	50	40	27
29470	31	31	18		29470	48	45	27
29570	24	27	22		29570	42	38	26
29670	25	29	20		29670	49	44	27
29770	28	28	18		29770	46	41	30
29870	25	25	14		29870	46	43	23
29970	31	30	16		29970	39	39	23
30070	31	26	17		30070	50	40	23
30170	27	26	18		30170	47	41	30
30270	31	26	17		30270	46	40	23
30370	27	25	18		30370	46	40	23
30470	28	26	17		30470	46	38	24
30570	26	26	19		30570	48	42	24
30670	28	29	20		30670	47	42	20
30770	27	26	19		30770	44	39	21
30870	23	27	19		30870	40	41	27
30970	28	28	16		30970	46	32	23
31070	28	30	15		31070	39	40	26
31170	26	26	14		31170	45	40	19
31270	26	24	17		31270	46	38	23
31370	28	26	13		31370	42	39	20
31470	27	25	15		31470	42	36	25
31570	24	27	17		31570	48	38	17
31670	27	27	18		31670	41	37	20
31770	28	25	15		31770	37	35	20
31870	28	25	17		31870	40	34	21
31970	26	24	14		31970	47	33	24
32070	28	22	15		32070	38	31	22
32170	26	24	15		32170	42	34	21
32270	28	22	14		32270	39	38	20
32370	27	25	15		32370	37	33	19
32470	29	30	14		32470	40	33	17
32570	26	26	16		32570	41	32	22
32670	22	20	17		32670	39	33	19
32770	29	25	10		32770	41	34	19
32870	23	19	14		32870	36	32	16
32970	22	24	16		32970	38	27	17
33070	23	23	15		33070	41	35	20
33170	20	25	18		33170	39	32	21
33270	22	23	11		33270	44	31	17
33370	26	22	15		33370	42	31	19
33470	28	21	11		33470	39	35	16
33570	23	22	16		33570	37	35	17
33670	25	23	15		33670	40	32	17
33770	23	20	13		33770	34	30	18
33870	24	20	15		33870	37	30	19
33970	29	20	15		33970	42	32	18
34070	21	24	15		34070	37	35	18
34170	23	24	11		34170	36	32	19
34270	20	21	12		34270	42	33	15
34370	21	20	13		34370	38	33	19
34470	21	24	14		34470	42	32	16
34570	24	21	17		34570	41	29	18
34670	20	18	12		34670	36	30	17
34770	23	20	12		34770	37	30	17
34870	26	20	14		34870	38	29	17
34970	22	19	11		34970	37	31	15
35070	23	22	13		35070	35	26	18
35170	25	24	13		35170	38	30	14
35270	24	23	13		35270	32	26	20
35370	22	19	11		35370	40	28	14
35470	23	19	13		35470	38	27	17
35570	26	21	11		35570	36	26	18
35670	24	20	11		35670	36	29	16
35770	21	22	11		35770	32	27	17
35870	24	18	13		35870	33	27	16
35970	23	18	13		35970	33	28	14
36070	24	20	11		36070	37	29	11
36170	20	17	11		36170	39	27	15
36270	26	17	10		36270	36	29	14
36370	20	18	11		36370	36	28	12
36470	21	18	11		36470	36	27	16
36570	20	18	14		36570	36	28	14
36670	20	18	12		36670	39	27	13
36770	24	22	12		36770	35	25	12
36870	23	15	11		36870	40	29	14
36970	24	21	11		36970	35	28	14
37070	23	21	10		37070	36	28	14
37170	16	19	11		37170	29	26	13
37270	21	23	11		37270	34	28	15
37370	24	17	11		37370	35	28	14
37470	21	22	12		37470	35	28	14
37570	23	15	11		37570	32	25	17
37670	21	21	11		37670	39	24	16
37770	23	21	11		37770	34	23	13
37870	21	19	11		37870	34	25	17
37970	24	17	12		37970	34	27	14
38070	21	20	11		38070	34	21	13
38170	18	19	10		38170	30	23	10
38270	19	18	11		38270	32	24	11
38370	22	17	10		38370	32	25	14
38470	17	15	10		38470	32	25	15
38570	22	21	9		38570	34	21	12
38670	20	18	10		38670	28	23	11
38770	18	16	12		38770	35	24	13
38870	22	20	8		38870	31	22	12
38970	16	15	10		38970	32	25	11
39070	19	19	9		39070	30	23	10
39170	16	17	11		39170	31	20	14
39270	21	16	12		39270	31	27	11
39370	16	17	9		39370	33	22	10
39470	22	17	9		39470	31	26	14
39570	20	14	12		39570	30	25	9
39670	19	17	9		39670	31	22	10
39770	18	16	10		39770	32	27	13
39870	20	20	12		39870	36	25	11
39970	19	16	7		39970	30	20	10
40070	21	14	11		40070	31	21	11
40170	19	14	10		40170	31	22	13
40270	18	17	8		40270	27	24	10
40370	18	16	9		40370	32	23	10
40470	21	16	9		40470	34	20	13
40570	21	15	10		40570	29	24	12
40670	16	15	8		40670	31	25	10
40770	18	17	11		40770	28	17	12
40870	23	17	11		40870	29	21	11
40970	19	15	9		40970	27	23	10
41070	16	16	9		41070	32	26	11
41170	19	16	8		41170	32	22	11
41270	20	15	9		41270	30	22	11
41370	16	14	11		41370	27	19	13
41470	21	16	7		41470	27	20	9
41570	19	16	10		41570	30	20	10
41670	17	14	10		41670	28	24	8
41770	18	15	9		41770	26	20	8
41870	18	16	9		41870	30	20	12
41970	18	14	7		41970	26	23	12
42070	19	12	9		42070	29	18	9
42170	16	15	10		42170	30	18	11
42270	20	12	10		42270	31	18	9
42370	16	16	8		42370	28	21	11
42470	18	17	9		42470	27	20	11
42570	17	14	9		42570	30	17	8
42670	20	14	8		42670	25	18	8
42770	20	14	8		42770	27	20	10
42870	19	13	8		42870	30	15	10
42970	15	17	10		42970	30	21	11
43070	18	14	7		43070	25	16	10
43170	18	13	7		43170	27	18	6
43270	20	17	9		43270	31	18	10
43370	17	12	7		43370	29	18	6
43470	20	15	7		43470	29	13	10
43570	20	14	10		43570	26	19	8
43670	18	14	7		43670	24	19	10
43770	19	10	9		43770	24	17	9
43870	19	13	10		43870	23	17	7
43970	16	13	9		43970	25	18	9
44070	21	16	9		44070	27	19	10
44170	17	13	10		44170	28	16	9
44270	18	11	8		44270	28	14	5
44370	16	12	8		44370	27	18	9
44470	18	14	8		44470	23	18	9
44570	15	13	7		44570	28	19	8
44670	16	16	7		44670	27	20	8
44770	19	12	8		44770	23	16	8
44870	17	13	7		44870	27	20	7
44970	13	13	9		44970	23	16	10
45070	16	11	8		45070	24	20	9
45170	18	12	7		45170	23	16	7
45270	17	12	7		45270	23	15	6
45370	18	14	10		45370	27	17	8
45470	15	13	7		45470	26	14	8
45570	15	13	7		45570	25	14	9
45670	16	12	9		45670	24	18	8
45770	19	13	7		45770	28	14	7
45870	15	12	9		45870	20	15	9
45970	16	14	7		45970	25	15	8
46070	15	15	7		46070	24	14	9
46170	18	13	7		46170	23	16	8
46270	14	12	8		46270	27	17	8
46370	16	13	6		46370	26	18	7
46470	14	11	7		46470	25	14	7
46570	17	14	8		46570	24	20	5
46670	15	11	7		46670	29	15	8
46770	14	12	8		46770	22	16	7
46870	18	13	7		46870	28	14	7
46970	20	10	7		46970	25	12	8
47070	14	12	8		47070	26	17	7
47170	19	13	7		47170	24	15	9
47270	19	12	9		47270	26	12	7
47370	18	12	7		47370	21	15	5
47470	17	14	7		47470	23	15	7
47570	15	13	9		47570	23	16	8
47670	13	9	9		47670	21	11	6
47770	14	12	7		47770	25	12	7
47870	14	13	8		47870	27	17	7
47970	15	11	7		47970	22	15	7
48070	16	11	9		48070	24	15	6
48170	15	12	7		48170	27	15	8
48270	14	10	6		48270	23	13	8
48370	15	10	8		48370	21	13	7
48470	15	12	8		48470	24	13	6
48570	12	12	8		48570	21	13	9
48670	14	12	6		48670	24	11	7
48770	15	11	8		48770	21	11	7
48870	12	11	6		48870	22	16	7
48970	14	13	7		48970	21	16	7
49070	19	12	7		49070	22	15	5
49170	14	11	7		49170	21	14	6
49270	13	10	8		49270	24	12	6
49370	15	8	7		49370	24	13	8
49470	15	9	6		49470	28	12	8
49570	13	11	7		49570	24	12	6
49670	16	12	8		49670	21	12	6
49770	16	10	8		49770	23	10	7
49870	14	11	8		49870	22	11	7
49970	13	11	6		49970	22	13	6
50070	12	12	8		50070	19	11	6
50170	16	10	6		50170	18	12	5
50270	13	14	8		50270	22	12	8
50370	13	12	8		50370	20	11	7
50470	16	11	6		50470	20	16	5
50570	13	9	5		50570	21	9	6
50670	13	11	6		50670	20	12	6
50770	12	10	7		50770	20	14	8
50870	15	9	8		50870	21	13	6
50970	15	11	8		50970	24	10	5
51070	13	10	7		51070	19	12	6
51170	11	11	7		51170	20	12	7
51270	14	10	7		51270	24	9	7
51370	13	11	8		51370	21	12	5
51470	13	11	6		51470	23	12	5
51570	11	10	7		51570	24	13	5
51670	12	10	7		51670	19	12	8
51770	13	8	8		51770	17	10	6
51870	13	9	8		51870	17	13	7
51970	12	9	6		51970	23	12	7
52070	15	9	7		52070	22	12	6
52170	14	10	8		52170	21	10	7
52270	14	10	8		52270	24	11	7
52370	13	11	8		52370	20	13	6
52470	14	9	6		52470	20	9	7
52570	12	10	7		52570	21	10	4
52670	14	8	6		52670	18	11	4
52770	10	9	8		52770	20	12	5
52870	14	9	8		52870	18	7	5
52970	14	7	9		52970	17	13	5
53070	14	8	8		53070	21	10	6
53170	10	8	7		53170	23	11	4
53270	14	9	7		53270	20	12	5
53370	12	9	7		53370	22	11	6
53470	11	9	6		53470	19	7	7
53570	15	9	8		53570	20	12	6
53670	10	12	8		53670	17	9	5
53770	13	9	7		53770	20	12	6
53870	13	9	6		53870	21	10	5
53970	10	8	6		53970	20	8	7
54070	13	11	7		54070	14	14	5
54170	12	8	8		54170	17	13	6
54270	14	8	6		54270	22	11	4
54370	11	12	7		54370	16	10	5
54470	15	8	8		54470	20	9	4
54570	11	8	7		54570	19	10	5
54670	10	8	8		54670	16	10	6
54770	13	9	6		54770	18	9	5
54870	13	9	8		54870	19	10	4
54970	13	6	7		54970	18	10	7
55070	13	7	6		55070	18	9	4
55170	14	10	7		55170	16	9	5
55270	13	9	5		55270	16	11	4
55370	16	9	6		55370	17	10	4
55470	12	9	8		55470	20	9	4
55570	12	7	6		55570	17	9	5
55670	10	9	6		55670	16	9	5
55770	11	7	6		55770	18	11	5
55870	14	10	7		55870	16	9	4
55970	10	9	7		55970	20	8	4
56070	10	9	8		56070	15	10	5
56170	12	8	7		56170	19	7	4
56270	15	7	7		56270	18	10	4
56370	12	6	7		56370	14	12	5
56470	13	8	7		56470	15	10	3
56570	10	9	5		56570	18	9	4
56670	12	9	7		56670	17	8	5
56770	10	10	7		56770	17	8	4
56870	12	7	6		56870	17	7	4
56970	13	7	8		56970	16	10	3
57070	11	10	6		57070	16	8	5
57170	12	9	7		57170	18	7	5
57270	12	10	7		57270	20	9	3
57370	11	11	7		57370	17	10	4
57470	9	9	8		57470	17	7	5
57570	12	9	7		57570	16	9	5
57670	13	7	6		57670	17	9	3
57770	10	9	5		57770	18	6	5
57870	11	8	6		57870	20	8	5
57970	12	8	6		57970	15	7	4
58070	12	8	6		58070	18	6	5
58170	9	7	5		58170	17	8	5
58270	11	6	7		58270	19	9	3
58370	10	10	5		58370	14	11	4
58470	12	7	6		58470	16	8	4
58570	12	7	7		58570	18	12	4
58670	12	8	6		58670	18	8	5
58770	13	8	6		58770	17	5	5
58870	11	8	6		58870	18	8	4
58970	9	10	4		58970	16	8	4
59070	11	9	7		59070	17	8	3
59170	13	8	5		59170	18	7	6
59270	10	8	7		59270	17	11	5
59370	11	8	7		59370	18	6	4
59470	8	7	6		59470	16	7	5
59570	11	7	7		59570	18	9	5
59670	10	7	6		59670	14	8	2
59770	12	6	6		59770	16	7	3
59870	12	6	4		59870	14	8	3
59970	14	8	5		59970	15	6	4
60070	11	8	6		60070	19	7	5
60170	12	8	6		60170	17	10	3
60270	9	7	5		60270	16	9	2
60370	14	8	7		60370	15	9	3
60470	10	7	9		60470	18	5	4
60570	12	6	6		60570	16	8	4
60670	10	8	6		60670	14	6	6
60770	11	7	7		60770	15	7	4
60870	11	8	7		60870	16	7	3
60970	11	7	5		60970	16	6	4
61070	9	6	7		61070	18	8	4
61170	11	6	7		61170	13	6	4
61270	10	8	6		61270	16	6	4
61370	12	8	7		61370	15	9	2
61470	11	7	7		61470	15	6	5
61570	10	8	7		61570	19	7	5
61670	13	7	6		61670	14	6	5
61770	11	8	5		61770	17	6	4
61870	11	6	7		61870	11	5	5
61970	9	8	6		61970	18	5	3
62070	10	7	8		62070	17	5	2
62170	8	7	6		62170	14	9	4
62270	9	7	9		62270	17	6	4
62370	12	7	6		62370	13	8	3
62470	10	6	6		62470	13	7	4
62570	6	9	6		62570	15	8	3
62670	10	6	6		62670	12	8	5
62770	10	7	9		62770	16	6	5
62870	11	7	7		62870	14	4	3
62970	10	5	7		62970	15	5	2
63070	12	6	7		63070	17	6	4
63170	8	7	6		63170	14	6	4
63270	12	7	5		63270	13	6	4
63370	8	7	6		63370	13	10	3
63470	9	7	5		63470	17	7	2
63570	9	8	6		63570	13	7	4
63670	11	8	6		63670	16	6	4
63770	10	7	5		63770	14	4	3
63870	9	6	7		63870	14	7	2
63970	10	7	6		63970	15	7	5
64070	10	7	6		64070	12	7	4
64170	11	5	4		64170	13	7	3
64270	10	7	7		64270	17	8	4
64370	9	8	7		64370	12	6	4
64470	9	6	6		64470	16	6	2
64570	9	7	6		64570	13	5	3
64670	8	8	7		64670	14	9	4
64770	9	7	6		64770	15	7	3
64870	8	7	6		64870	13	7	2
64970	12	7	6		64970	15	6	3
65070	11	7	6		65070	13	8	4
65170	9	6	7		65170	13	6	4
65270	8	6	6		65270	12	7	2
65370	10	6	7		65370	13	7	6
65470	12	7	5		65470	14	5	2
65570	11	7	6		65570	11	6	2
65670	9	6	5		65670	14	4	3
65770	8	9	5		65770	15	5	3
65870	10	6	8		65870	15	7	4
65970	10	8	9		65970	15	8	4
66070	10	6	6		66070	11	6	1
66170	10	7	5		66170	13	3	2
66270	8	9	6		66270	13	5	3
66370	8	6	5		66370	11	6	3
66470	11	8	7		66470	13	6	4
66570	9	6	5		66570	15	6	3
66670	8	5	6		66670	13	6	4
66770	10	6	5		66770	14	5	5
66870	9	8	7		66870	11	6	2
66970	11	8	6		66970	13	5	4
67070	9	6	6		67070	12	6	3
67170	9	7	7		67170	14	7	5
67270	10	8	6		67270	14	6	4
67370	9	6	5		67370	10	6	3
67470	8	6	4		67470	13	6	2
67570	10	7	5		67570	11	5	4
67670	10	5	5		67670	12	6	2
67770	10	6	6		67770	12	7	4
67870	9	5	6		67870	12	7	3
67970	9	7	4		67970	11	6	1
68070	9	7	6		68070	13	5	4
68170	11	6	5		68170	10	5	5
68270	10	6	6		68270	16	3	2
68370	11	6	6		68370	12	6	2
68470	7	8	4		68470	9	5	3
68570	8	7	6		68570	8	7	4
68670	7	7	6		68670	13	6	2
68770	7	6	6		68770	12	5	2
68870	8	7	6		68870	12	5	4
68970	7	6	6		68970	11	4	2
69070	8	5	6		69070	14	6	3
69170	8	5	5		69170	10	7	2
69270	8	7	6		69270	13	5	2
69370	8	5	5		69370	14	4	4
69470	11	5	6		69470	14	7	4
69570	9	6	7		69570	12	3	4
69670	8	7	5		69670	12	5	4
69770	11	5	6		69770	10	5	4
69870	9	6	5		69870	10	5	4
69970	10	7	5		69970	14	4	3
70070	9	6	5		70070	10	6	4
70170	9	6	5		70170	10	6	3
70270	8	5	6		70270	12	5	3
70370	9	5	5		70370	8	6	5
70470	10	5	6		70470	10	7	2
70570	9	6	5		70570	11	5	2
70670	8	5	6		70670	12	3	3
70770	8	7	7		70770	14	4	3
70870	9	5	6		70870	14	4	2
70970	9	6	6		70970	12	3	3
71070	9	6	6		71070	11	6	2
71170	11	5	5		71170	11	4	3
71270	9	6	5		71270	12	5	3
71370	9	5	6		71370	11	5	2
71470	8	6	4		71470	8	4	3
71570	8	4	5		71570	11	3	3
71670	10	6	7		71670	9	5	2
71770	9	7	6		71770	13	5	5
71870	8	7	5		71870	11	6	4
71970	7	6	5		71970	10	2	3
72070	9	7	7		72070	11	4	3
72170	10	7	7		72170	11	3	2
72270	7	5	5		72270	8	4	3
72370	8	6	6		72370	10	5	3
72470	7	6	5		72470	9	3	3
72570	9	6	5		72570	11	4	4
72670	8	6	5		72670	10	4	1
72770	8	5	6		72770	10	6	4
72870	9	5	5		72870	11	3	2
72970	7	6	5		72970	11	6	4
73070	10	6	6		73070	10	3	1
73170	9	6	5		73170	11	4	3
73270	8	5	4		73270	11	5	3
73370	8	4	7		73370	10	3	2
73470	7	7	6		73470	10	4	2
73570	8	5	4		73570	11	5	3
73670	9	6	6		73670	9	4	3
73770	7	6	6		73770	9	5	3
73870	7	8	5		73870	8	5	2
73970	8	5	5		73970	11	3	2
74070	8	6	6		74070	11	5	2
74170	7	6	4		74170	12	3	2
74270	9	5	6		74270	9	4	3
74370	8	5	5		74370	10	3	3
74470	11	8	7		74470	11	3	2
74570	8	5	6		74570	10	4	2
74670	8	5	6		74670	11	4	3
74770	9	6	6		74770	10	4	3
74870	8	6	4		74870	9	4	2
74970	9	5	5		74970	8	3	4
75070	9	5	6		75070	8	4	3
75170	10	7	5		75170	13	4	3
75270	7	5	6		75270	12	4	2
75370	8	4	6		75370	11	4	3
75470	7	7	5		75470	10	4	3
75570	9	5	5		75570	11	5	1
75670	7	6	5		75670	10	4	3
75770	8	4	5		75770	9	4	3
75870	7	6	6		75870	13	4	2
75970	8	6	4		75970	9	5	3
76070	9	5	7		76070	9	3	2
76170	8	5	6		76170	9	6	4
76270	8	6	5		76270	7	2	3
76370	6	5	4		76370	9	4	3
76470	8	6	5		76470	7	3	2
76570	6	6	5		76570	11	4	3
76670	8	5	5		76670	10	4	2
76770	9	6	6		76770	10	3	2
76870	7	7	5		76870	9	4	4
76970	6	7	6		76970	8	3	2
77070	8	6	7		77070	8	5	3
77170	8	5	6		77170	8	4	3
77270	7	5	6		77270	7	4	2
77370	9	4	4		77370	8	3	3
77470	7	5	5		77470	11	5	2
77570	6	5	5		77570	8	5	2
77670	7	7	5		77670	10	3	1
77770	8	6	6		77770	10	4	3
77870	8	4	5		77870	8	4	3
77970	6	5	5		77970	9	3	3
78070	7	5	4		78070	8	3	2
78170	6	5	4		78170	9	3	4
78270	8	7	7		78270	9	4	1
78370	9	6	5		78370	10	4	2
78470	5	6	6		78470	8	4	1
78570	7	6	5		78570	11	4	4
78670	5	5	5		78670	9	2	3
78770	8	6	5		78770	11	4	2
78870	8	5	6		78870	10	5	2
78970	7	4	4		78970	10	3	1
79070	7	5	5		79070	9	4	2
79170	7	5	5		79170	10	3	1
79270	6	5	6		79270	9	2	3
79370	8	6	6		79370	10	3	3
79470	8	6	6		79470	6	4	2
79570	8	5	5		79570	9	3	2
79670	6	5	6		79670	10	3	2
79770	6	5	5		79770	9	3	2
79870	7	6	7		79870	11	2	2
79970	9	6	5		79970	9	3	1
80070	7	5	5		80070	11	4	4
80170	9	5	7		80170	9	4	2
80270	9	6	5		80270	8	4	3
80370	7	6	6		80370	8	4	2
80470	7	6	7		80470	7	3	2
80570	6	5	6		80570	6	4	2
80670	7	6	5		80670	11	2	2
80770	9	5	5		80770	8	3	3
80870	8	6	6		80870	9	1	3
80970	6	5	6		80970	11	5	1
81070	9	4	6		81070	9	4	2
81170	6	6	6		81170	11	3	2
81270	6	5	4		81270	7	4	2
81370	8	5	7		81370	7	4	3
81470	8	5	6		81470	8	4	1
81570	6	4	5		81570	9	3	2
81670	6	4	5		81670	6	3	1
81770	8	3	4		81770	7	4	2
81870	6	6	5		81870	7	3	2
81970	7	4	4		81970	7	4	2
82070	6	6	5		82070	10	3	2
82170	7	4	5		82170	8	3	2
82270	6	6	4		82270	8	3	2
82370	6	5	5		82370	7	3	2
82470	5	5	6		82470	9	4	2
82570	6	4	5		82570	9	4	3
82670	6	6	6		82670	8	4	4
82770	5	5	7		82770	7	3	2
82870	7	6	5		82870	8	3	0
82970	6	4	7		82970	8	3	2
83070	9	5	6		83070	8	3	3
83170	7	4	5		83170	8	3	2
83270	7	5	6		83270	6	2	2
83370	7	5	6		83370	8	3	3
83470	6	4	5		83470	8	4	3
83570	6	6	7		83570	7	3	2
83670	7	6	5		83670	8	4	2
83770	6	5	7		83770	9	4	1
83870	6	5	5		83870	7	3	1
83970	6	5	6		83970	9	3	2
84070	6	6	5		84070	6	2	1
84170	8	5	5		84170	8	3	2
84270	6	6	4		84270	9	2	3
84370	6	5	5		84370	8	3	1
84470	7	3	5		84470	7	4	2
84570	7	4	6		84570	9	4	2
84670	6	5	6		84670	9	2	1
84770	7	5	5		84770	7	3	1
84870	9	4	6		84870	8	3	1
84970	6	6	5		84970	8	3	2
85070	6	4	4		85070	9	4	2
85170	7	5	5		85170	7	3	2
85270	7	6	5		85270	5	3	1
85370	7	5	4		85370	6	3	3
85470	8	6	6		85470	7	3	2
85570	6	7	5		85570	8	4	2
85670	6	5	4		85670	9	3	2
85770	5	4	6		85770	9	2	3
85870	7	5	5		85870	6	4	2
85970	7	5	5		85970	7	3	3
86070	7	4	5		86070	7	5	2
86170	6	4	6		86170	7	2	3
86270	8	6	5		86270	8	1	3
86370	6	6	5		86370	9	1	2
86470	7	4	5		86470	8	3	1
86570	6	5	5		86570	6	4	2
86670	7	5	5		86670	6	2	1
86770	7	5	4		86770	7	2	2
86870	7	4	5		86870	6	3	1
86970	5	4	6		86970	9	3	2
87070	6	3	5		87070	7	4	3
87170	6	6	5		87170	6	2	1
87270	6	5	4		87270	6	3	3
87370	7	5	6		87370	7	2	3
87470	8	5	5		87470	7	2	2
87570	6	5	5		87570	7	2	2
87670	7	5	5		87670	8	3	1
87770	8	6	7		87770	5	3	1
87870	6	3	5		87870	6	3	2
87970	6	4	7		87970	5	4	2
88070	6	4	5		88070	7	2	2
88170	6	4	6		88170	5	3	2
88270	7	5	4		88270	9	2	3
88370	8	6	6		88370	8	2	0
88470	6	4	5		88470	6	2	3
88570	6	6	5		88570	8	2	3
88670	7	5	5		88670	8	3	2
88770	6	4	6		88770	7	2	2
88870	7	5	5		88870	7	1	1
88970	8	5	6		88970	7	2	1
89070	8	5	5		89070	6	2	3
89170	3	5	6		89170	8	3	2
89270	6	4	6		89270	7	3	2
89370	6	4	4		89370	7	2	2
89470	6	7	5		89470	8	2	2
89570	7	5	5		89570	8	2	1
89670	5	6	4		89670	10	2	2
89770	8	5	4		89770	8	2	2
89870	6	5	4		89870	8	2	1
89970	6	4	6		89970	8	2	3
90070	8	5	5		90070	6	2	1
90170	6	4	5		90170	6	3	2
90270	5	4	5		90270	7	2	2
90370	5	4	4		90370	7	1	2
90470	7	4	4		90470	7	1	2
90570	5	6	6		90570	6	3	1
90670	7	5	6		90670	7	2	2
90770	6	5	6		90770	7	2	1
90870	7	5	5		90870	7	3	3
90970	6	4	6		90970	6	2	1
91070	5	6	5		91070	5	2	3
91170	5	4	5		91170	8	1	2
91270	4	6	4		91270	6	2	2
91370	7	4	5		91370	7	2	2
91470	6	6	4		91470	6	2	2
91570	5	4	6		91570	5	2	1
91670	6	4	6		91670	5	2	2
91770	4	5	5		91770	6	3	3
91870	8	3	5		91870	8	1	2
91970	7	5	5		91970	6	2	2
92070	5	6	5		92070	7	2	2
92170	6	6	6		92170	6	1	1
92270	6	4	6		92270	8	3	1
92370	6	4	6		92370	5	3	1
92470	7	4	6		92470	7	3	3
92570	4	5	7		92570	5	2	2
92670	8	4	5		92670	6	2	1
92770	6	5	5		92770	4	2	4
92870	6	5	5		92870	8	2	2
92970	6	5	5		92970	6	2	1
93070	6	5	4		93070	5	2	3
93170	6	6	5		93170	4	2	1
93270	5	4	6		93270	5	3	1
93370	6	3	6		93370	7	2	2
93470	6	4	6		93470	5	2	2
93570	7	5	5		93570	7	2	2
93670	8	4	5		93670	5	2	4
93770	6	4	5		93770	5	4	1
93870	4	5	6		93870	7	3	1
93970	6	3	6		93970	7	3	2
94070	6	5	6		94070	6	3	1
94170	5	4	5		94170	5	3	1
94270	7	4	6		94270	6	2	1
94370	8	3	6		94370	6	1	3
94470	5	5	5		94470	6	1	2
94570	5	4	6		94570	6	1	1
94670	6	5	5		94670	7	2	1
94770	6	5	5		94770	6	2	2
94870	5	6	8		94870	4	3	3
94970	5	5	4		94970	5	2	1
95070	6	4	6		95070	6	3	3
95170	6	4	5		95170	6	3	1
95270	7	5	5		95270	5	2	2
95370	9	3	5		95370	3	1	1
95470	6	6	5		95470	4	1	2
95570	5	4	5		95570	7	2	1
95670	5	4	6		95670	7	2	2
95770	6	4	5		95770	5	1	2
95870	5	4	5		95870	7	2	1
95970	6	4	6		95970	5	2	3
96070	5	5	4		96070	8	1	2
96170	6	6	5		96170	6	3	1
96270	4	4	4		96270	7	2	1
96370	5	4	5		96370	3	1	2
96470	5	6	5		96470	5	3	3
96570	4	4	5		96570	7	3	2
96670	6	6	7		96670	5	1	2
96770	5	5	7		96770	6	3	2
96870	6	5	4		96870	6	1	2
96970	6	4	6		96970	4	2	2
97070	7	5	5		97070	6	1	1
97170	5	6	5		97170	6	3	3
97270	8	5	6		97270	6	1	3
97370	5	4	6		97370	6	3	2
97470	5	4	6		97470	5	1	2
97570	8	4	5		97570	7	2	2
97670	5	5	5		97670	5	2	1
97770	8	4	5		97770	6	1	1
97870	5	5	6		97870	4	2	1
97970	6	4	5		97970	5	3	1
98070	7	3	5		98070	6	2	1
98170	6	5	4		98170	6	2	1
98270	5	5	4		98270	4	2	0
98370	6	5	6		98370	5	1	1
98470	6	6	6		98470	5	2	1
98570	5	5	5		98570	5	2	2
98670	5	7	5		98670	7	2	2
98770	8	4	5		98770	5	1	2
98870	7	4	5		98870	6	3	2
98970	6	4	4		98970	7	2	1
99070	5	4	5		99070	5	3	2
99170	7	4	6		99170	6	2	2
99270	4	4	5		99270	5	2	1
99370	7	4	6		99370	4	2	1
99470	5	6	5		99470	6	2	2
99570	5	4	6		99570	6	2	2
99670	7	4	5		99670	6	0	1
99770	5	4	5		99770	5	2	2
99870	6	5	5		99870	5	3	1
99970	7	4	4		99970	4	2	1
100070	6	5	5		100070	6	3	2
100170	6	5	6		100170	5	2	1
100270	7	5	5		100270	3	2	1
100370	5	4	5		100370	5	1	1
100470	5	5	5		100470	6	2	1
100570	5	4	6		100570	5	2	1
100670	6	4	6		100670	5	4	1
100770	6	5	6		100770	4	1	0
100870	5	5	4		100870	6	3	2
100970	5	4	8		100970	4	2	3
101070	6	4	4		101070	6	2	3
101170	6	3	6		101170	3	2	2
101270	7	6	6		101270	6	1	1
101370	6	3	5		101370	5	1	2
101470	6	4	5		101470	4	2	1
101570	6	4	5		101570	6	1	1
101670	5	5	6		101670	3	2	3
101770	7	5	6		101770	6	2	2
101870	6	3	6		101870	5	2	3
101970	5	5	7		101970	4	2	2
102070	6	4	3		102070	4	1	1
102170	6	5	5		102170	6	1	2
102270	5	3	4		102270	5	2	3
102370	5	5	4		102370	5	0	1
102470	6	4	6		102470	3	1	1
102570	4	4	5		102570	5	3	1
102670	5	3	6		102670	6	1	1
102770	5	4	5		102770	4	2	2
102870	5	5	7		102870	6	1	1
102970	5	4	6		102970	4	1	3
103070	5	4	5		103070	6	2	1
103170	6	5	4		103170	3	2	1
103270	5	5	6		103270	6	0	1
103370	5	5	6		103370	5	2	2
103470	6	6	5		103470	6	1	2
103570	4	4	5		103570	4	1	1
103670	6	5	5		103670	4	2	2
103770	6	4	5		103770	4	1	2
103870	5	3	7		103870	4	1	1
103970	5	5	5		103970	4	3	2
104070	6	5	5		104070	4	1	2
104170	5	5	6		104170	4	2	1
104270	6	4	5		104270	4	2	2
104370	4	5	5		104370	5	1	0
104470	5	4	5		104470	6	1	2
104570	5	4	5		104570	4	1	2
104670	5	4	6		104670	6	2	1
104770	5	5	5		104770	5	3	2
104870	5	5	5		104870	5	1	1
104970	6	4	4		104970	5	1	2
105070	6	6	5		105070	5	1	1
105170	6	4	5		105170	5	2	2
105270	6	5	5		105270	4	1	1
105370	6	3	6		105370	5	2	1
105470	5	4	5		105470	5	2	1
105570	6	4	5		105570	6	1	1
105670	5	5	6		105670	2	1	2
105770	5	4	6		105770	4	2	1
105870	6	3	7		105870	4	1	1
105970	6	4	7		105970	4	0	2
106070	6	4	5		106070	2	1	1
106170	5	4	5		106170	6	1	1
106270	5	4	6		106270	4	0	2
106370	5	5	4		106370	5	1	1
106470	4	5	5		106470	7	3	1
106570	5	4	7		106570	4	2	0
106670	5	5	6		106670	4	2	1
106770	6	3	4		106770	4	2	1
106870	6	5	4		106870	5	1	2
106970	5	5	3		106970	5	1	1
107070	5	5	5		107070	4	3	0
107170	4	4	4		107170	5	1	1
107270	3	4	5		107270	3	1	3
107370	5	4	5		107370	4	1	1
107470	4	4	3		107470	5	1	1
107570	5	5	5		107570	4	1	2
107670	3	4	5		107670	7	1	2
107770	5	3	5		107770	4	1	1
107870	4	5	3		107870	5	1	2
107970	5	6	6		107970	3	1	3
108070	4	4	7		108070	4	1	1
108170	5	5	5		108170	4	0	1
108270	5	4	5		108270	3	1	1
108370	5	4	6		108370	4	1	2
108470	5	5	4		108470	4	1	1
108570	6	6	4		108570	3	1	1
108670	5	4	5		108670	4	1	1
108770	6	5	4		108770	3	3	2
108870	5	5	5		108870	3	2	2
108970	4	5	7		108970	4	2	1
109070	5	4	4		109070	4	1	1
109170	5	5	4		109170	5	2	2
109270	6	4	4		109270	4	2	1
109370	4	3	4		109370	5	1	2
109470	6	4	6		109470	6	2	0
109570	5	4	3		109570	5	1	1
109670	5	3	5		109670	5	1	1
109770	7	4	4		109770	4	3	2
109870	5	4	6		109870	5	1	2
109970	5	5	5		109970	3	1	1
110070	4	4	5		110070	4	1	1
110170	5	3	7		110170	5	2	1
110270	5	4	4		110270	3	1	1
110370	5	4	5		110370	3	0	2
110470	7	4	5		110470	4	1	1
110570	4	3	5		110570	4	1	1
110670	6	3	5		110670	4	0	2
110770	5	4	3		110770	3	2	2
110870	5	5	4		110870	4	2	2
110970	5	3	4		110970	3	1	1
111070	3	4	4		111070	2	1	2
111170	5	5	5		111170	3	2	2
111270	5	5	5		111270	3	2	1
111370	4	5	4		111370	4	1	1
111470	5	5	5		111470	3	2	1
111570	5	4	5		111570	4	0	2
111670	6	4	5		111670	3	0	0
111770	5	4	5		111770	5	0	2
111870	8	4	5		111870	5	0	1
111970	4	5	3		111970	4	1	1
112070	5	5	5		112070	2	2	1
112170	5	4	6		112170	6	1	3
112270	4	4	4		112270	5	1	2
112370	5	4	5		112370	3	1	2
112470	5	3	4		112470	5	1	2
112570	5	5	6		112570	4	1	2
112670	5	4	5		112670	5	1	1
112770	4	4	6		112770	4	2	3
112870	6	4	6		112870	3	2	2
112970	5	5	5		112970	5	1	2
113070	5	4	4		113070	3	2	1
113170	5	5	6		113170	2	1	0
113270	6	5	5		113270	4	2	2
113370	5	6	4		113370	4	2	2
113470	5	4	5		113470	3	1	1
113570	4	4	6		113570	4	2	2
113670	4	4	4		113670	2	0	1
113770	4	3	5		113770	5	1	3
113870	4	4	5		113870	5	2	1
113970	5	4	3		113970	4	2	1
114070	5	4	5		114070	3	1	1
114170	4	5	4		114170	2	1	1
114270	5	4	5		114270	3	2	1
114370	5	4	5		114370	4	2	0
114470	4	5	5		114470	2	1	1
114570	4	4	5		114570	3	1	2
114670	4	4	5		114670	5	1	1
114770	5	4	4		114770	3	1	1
114870	5	4	7		114870	3	0	3
114970	5	4	4		114970	4	1	2
115070	6	4	4		115070	3	1	1
115170	4	4	6		115170	4	2	1
115270	5	4	5		115270	3	2	1
115370	3	5	5		115370	3	1	2
115470	5	4	5		115470	4	1	1
115570	6	4	5		115570	5	1	2
115670	3	4	5		115670	2	2	2
115770	5	4	5		115770	3	1	2
115870	4	3	5		115870	5	1	1
115970	5	3	5		115970	4	1	1
116070	4	4	4		116070	3	3	1
116170	5	5	6		116170	4	1	2
116270	5	5	6		116270	3	2	1
116370	5	5	5		116370	5	1	1
116470	5	5	6		116470	3	1	2
116570	5	5	4		116570	6	2	2
116670	5	4	6		116670	3	1	1
116770	4	4	5		116770	3	1	1
116870	5	3	4		116870	3	2	1
116970	7	4	6		116970	2	1	1
117070	5	5	6		117070	4	2	1
117170	4	4	6		117170	4	1	2
117270	5	3	6		117270	5	1	2
117370	4	5	3		117370	3	1	2
117470	5	4	5		117470	4	1	1
117570	5	5	5		117570	4	1	0
117670	4	4	6		117670	3	0	1
117770	5	5	5		117770	3	2	1
117870	4	4	5		117870	2	0	1
117970	4	4	4		117970	4	1	2
118070	4	4	7		118070	3	1	0
118170	6	4	4		118170	4	1	1
118270	4	4	5		118270	3	2	1
118370	5	4	3		118370	4	1	1
118470	5	4	5		118470	3	1	1
118570	4	4	5		118570	3	2	1
118670	5	4	5		118670	2	2	1
118770	4	4	5		118770	2	1	0
118870	5	4	5		118870	2	2	0
118970	5	4	6		118970	3	1	1
119070	4	3	5		119070	3	2	0
119170	5	4	6		119170	4	1	2
119270	4	6	5		119270	2	1	2
119370	5	3	5		119370	3	1	1
119470	4	4	5		119470	3	1	1
119570	5	4	5		119570	2	0	1
119670	4	5	4		119670	4	2	1
119770	5	5	6		119770	2	2	1
119870	4	3	6		119870	2	2	1
119970	5	5	5		119970	4	1	2
120070	4	4	4		120070	2	1	2
120170	4	5	4		120170	3	2	1
120270	5	4	6		120270	2	1	1
120370	3	5	3		120370	4	2	2
120470	5	4	5		120470	4	1	1
120570	4	4	4		120570	4	1	1
120670	4	4	4		120670	3	1	2
120770	4	4	5		120770	2	0	1
120870	4	5	5		120870	3	2	1
120970	5	4	4		120970	4	1	2
121070	6	6	6		121070	4	1	1
121170	5	5	5		121170	2	0	2
121270	6	3	5		121270	3	0	1
121370	4	5	4		121370	4	2	1
121470	4	3	6		121470	4	1	1
121570	4	4	4		121570	3	2	1
121670	4	3	5		121670	3	2	2
121770	4	4	4		121770	2	1	1
121870	5	4	4		121870	2	2	2
121970	4	4	6		121970	3	1	1
122070	6	4	5		122070	4	1	1
122170	5	4	5		122170	3	2	2
122270	5	4	5		122270	4	0	1
122370	4	4	4		122370	3	2	2
122470	6	4	6		122470	2	0	1
122570	4	4	5		122570	4	1	1
122670	5	4	4		122670	4	0	1
122770	5	4	5		122770	4	1	1
122870	5	4	5		122870	3	2	1
122970	5	4	4		122970	3	0	1
123070	4	4	5		123070	2	1	1
123170	5	6	5		123170	3	0	2
123270	5	4	5		123270	3	1	1
123370	5	4	5		123370	3	1	1
123470	5	4	4		123470	2	2	2
123570	4	4	6		123570	2	2	1
123670	5	4	4		123670	2	1	1
123770	5	5	5		123770	3	2	1
123870	5	5	5		123870	3	1	1
123970	5	4	6		123970	3	1	1
124070	4	4	4		124070	3	1	1
124170	4	5	5		124170	4	0	0
124270	4	4	7		124270	3	2	2
124370	4	4	6		124370	3	1	2
124470	3	3	5		124470	4	2	1
124570	6	4	4		124570	4	2	2
124670	5	4	4		124670	4	1	1
124770	5	5	4		124770	3	1	2
124870	5	4	5		124870	3	2	2
124970	5	4	5		124970	2	1	1
125070	4	3	5		125070	3	1	0
125170	4	5	6		125170	2	1	2
125270	5	4	4		125270	3	1	2
125370	5	3	4		125370	3	1	2
125470	4	4	5		125470	4	1	2
125570	3	3	5		125570	2	1	1
125670	4	5	4		125670	2	1	1
125770	3	4	5		125770	3	1	2
125870	5	4	4		125870	2	1	2
125970	4	5	5		125970	3	0	2
126070	5	4	4		126070	2	1	1
126170	4	4	4		126170	3	1	1
126270	5	4	5		126270	3	2	1
126370	4	4	6		126370	3	2	1
126470	6	5	4		126470	3	1	1
126570	5	4	4		126570	3	2	0
126670	4	5	5		126670	2	1	1
126770	5	5	5		126770	3	1	1
126870	3	4	4		126870	2	1	2
126970	3	4	5		126970	2	1	1
127070	3	4	4		127070	3	1	2
127170	4	3	5		127170	3	0	2
127270	4	3	5		127270	2	0	2
127370	4	4	5		127370	3	1	2
127470	4	5	5		127470	2	1	1
127570	5	4	6		127570	4	0	1
127670	4	4	5		127670	2	1	1
127770	4	4	5		127770	2	0	0
127870	4	6	4		127870	3	1	1
127970	5	4	4		127970	3	0	1
128070	4	5	6		128070	3	0	1
128170	4	4	6		128170	3	1	1
128270	5	5	4		128270	2	1	2
128370	5	4	4		128370	4	0	1
128470	3	5	4		128470	2	0	1
128570	4	3	5		128570	3	0	1
128670	5	4	7		128670	4	1	2
128770	4	4	5		128770	2	0	2
128870	4	4	4		128870	2	2	2
128970	5	4	5		128970	3	0	1
129070	6	5	5		129070	1	1	2
129170	6	5	4		129170	3	1	2
129270	4	4	6		129270	3	0	0
129370	4	3	5		129370	2	1	2
129470	4	4	4		129470	3	0	1
129570	5	4	7		129570	2	1	1
129670	5	4	3		129670	3	0	2
129770	4	4	6		129770	2	1	1
129870	4	6	4		129870	2	2	1
129970	4	4	6		129970	2	1	1
130070	5	6	5		130070	2	1	1
130170	4	4	5		130170	2	1	1
130270	3	4	6		130270	3	2	2
130370	4	4	5		130370	2	0	1
130470	5	4	4		130470	2	0	2
130570	3	4	6		130570	2	1	1
130670	5	4	4		130670	4	1	1
130770	4	4	5		130770	3	0	1
130870	5	5	5		130870	3	0	1
130970	5	4	4		130970	3	1	1
131070	4	5	5		131070	2	0	3
131170	4	5	5		131170	2	0	1
131270	5	5	6		131270	3	0	1
131370	4	4	6		131370	2	1	2
131470	4	3	5		131470	2	0	1
131570	4	4	5		131570	2	0	1
131670	5	4	6		131670	3	1	1
131770	4	5	6		131770	2	1	1
131870	6	4	5		131870	3	2	2
131970	5	3	7		131970	1	0	0
132070	4	5	6		132070	1	2	2
132170	3	3	5		132170	3	1	1
132270	5	4	6		132270	2	1	1
132370	4	4	4		132370	2	0	1
132470	3	4	4		132470	3	2	1
132570	3	4	5		132570	3	1	0
132670	5	4	6		132670	2	1	1
132770	4	5	5		132770	2	1	2
132870	4	4	5		132870	2	0	0
132970	4	4	6		132970	1	2	1
133070	6	4	4		133070	3	1	1
133170	3	5	3		133170	2	1	1
133270	4	4	6		133270	2	1	0
133370	4	5	5		133370	3	2	1
133470	5	4	4		133470	3	2	1
133570	4	5	6		133570	1	1	2
133670	5	4	6		133670	2	1	1
133770	4	3	4		133770	4	1	1
133870	4	5	4		133870	3	1	1
133970	3	5	5		133970	3	1	1
134070	5	5	4		134070	2	1	1
134170	4	4	5		134170	2	0	0
134270	4	4	4		134270	2	1	1
134370	4	5	4		134370	3	1	1
134470	4	4	5		134470	3	1	1
134570	4	4	3		134570	1	0	1
134670	4	3	4		134670	3	1	1
134770	4	4	5		134770	2	0	1
134870	4	4	5		134870	3	0	1
134970	4	4	5		134970	2	2	2
135070	4	4	4		135070	3	1	0
135170	4	4	3		135170	2	0	1
135270	3	5	6		135270	2	1	1
135370	4	4	5		135370	3	2	0
135470	3	5	4		135470	3	0	1
135570	4	4	5		135570	2	2	1
135670	4	5	5		135670	2	0	0
135770	4	5	5		135770	3	1	1
135870	5	5	3		135870	2	1	1
135970	5	5	6		135970	2	1	0
136070	4	4	6		136070	2	2	1
136170	3	4	4		136170	2	1	1
136270	4	4	5		136270	2	1	1
136370	3	5	6		136370	1	1	0
136470	3	3	5		136470	3	2	0
136570	4	3	6		136570	2	1	1
136670	3	4	5		136670	2	1	1
136770	5	5	7		136770	2	2	1
136870	4	4	5		136870	1	1	1
136970	4	4	3		136970	3	1	2
137070	5	4	3		137070	3	1	1
137170	4	4	5		137170	3	0	1
137270	3	4	4		137270	2	1	0
137370	5	4	5		137370	1	1	2
137470	4	4	4		137470	1	1	1
137570	4	4	5		137570	2	1	1
137670	5	5	5		137670	4	1	1
137770	4	4	4		137770	2	1	1
137870	5	5	5		137870	3	0	2
137970	4	5	4		137970	2	1	0
138070	6	5	5		138070	2	0	1
138170	4	4	5		138170	3	0	1
138270	3	5	6		138270	3	2	0
138370	5	4	4		138370	1	1	1
138470	4	5	5		138470	3	1	0
138570	5	3	4		138570	3	1	1
138670	5	5	5		138670	2	0	0
138770	4	3	5		138770	2	0	3
138870	4	4	5		138870	3	1	2
138970	4	4	5		138970	2	1	2
139070	3	4	4		139070	2	1	1
139170	3	4	5		139170	1	2	0
139270	5	4	5		139270	3	0	1
139370	3	3	4		139370	3	2	2
139470	4	5	6		139470	2	0	1
139570	4	4	5		139570	2	1	1
139670	4	4	5		139670	2	1	2
139770	3	4	6		139770	2	0	2
139870	4	4	5		139870	2	2	1
139970	4	5	5		139970	2	1	1
140070	5	3	6		140070	2	1	1
140170	5	3	5		140170	3	2	1
140270	4	4	4		140270	3	0	1
140370	5	4	5		140370	2	1	0
140470	3	4	6		140470	2	1	1
140570	4	4	5		140570	2	0	0
140670	3	4	3		140670	1	2	0
140770	3	4	5		140770	2	1	1
140870	4	5	4		140870	2	0	2
140970	4	4	7		140970	2	1	1
141070	4	4	6		141070	1	1	1
141170	4	4	5		141170	2	0	1
141270	5	3	5		141270	2	1	1
141370	4	5	4		141370	1	0	1
141470	5	3	5		141470	2	1	1
141570	3	4	5		141570	1	1	1
141670	3	3	5		141670	2	0	0
141770	4	4	4		141770	2	1	0
141870	4	5	5		141870	2	1	2
141970	5	5	5		141970	2	1	1
142070	5	4	4		142070	1	1	2
142170	4	4	4		142170	2	0	2
142270	4	4	5		142270	2	1	1
142370	5	4	5		142370	2	0	1
142470	4	3	5		142470	2	1	1
142570	4	4	4		142570	2	1	1
142670	4	5	5		142670	1	1	1
142770	4	4	5		142770	3	1	1
142870	5	4	5		142870	1	0	0
142970	4	4	5		142970	2	1	1
143070	4	4	5		143070	1	0	0
143170	4	3	5		143170	3	1	2
143270	4	4	4		143270	1	1	1
143370	4	3	4		143370	1	1	1
143470	4	4	5		143470	2	0	1
143570	4	4	4		143570	3	1	2
143670	6	4	5		143670	5	1	1
143770	4	3	5		143770	2	1	0
143870	4	4	5		143870	3	1	1
143970	3	4	4		143970	2	1	1
144070	4	5	4		144070	1	1	0
144170	4	5	4		144170	1	0	1
144270	4	4	4		144270	1	0	1
144370	4	5	4		144370	1	1	2
144470	4	5	5		144470	2	1	0
144570	4	4	5		144570	3	0	3
144670	4	4	6		144670	3	0	1
144770	4	4	5		144770	1	1	2
144870	3	4	4		144870	1	1	1
144970	4	4	5		144970	2	0	1
145070	4	3	5		145070	2	1	1
145170	5	4	5		145170	1	1	0
145270	5	4	6		145270	2	1	2
145370	5	4	5		145370	3	0	0
145470	4	5	5		145470	2	0	2
145570	4	5	5		145570	2	0	2
145670	4	5	5		145670	2	1	1
145770	4	4	5		145770	2	2	1
145870	5	3	4		145870	1	2	1
145970	3	5	6		145970	2	0	0
146070	4	4	4		146070	2	0	1
146170	3	4	4		146170	2	0	1
146270	5	6	6		146270	2	0	2
146370	4	4	5		146370	1	0	1
146470	4	4	4		146470	1	1	0
146570	4	3	5		146570	1	1	1
146670	4	4	4		146670	2	1	1
146770	4	3	4		146770	2	1	1
146870	3	3	5		146870	3	1	0
146970	5	4	4		146970	2	0	1
147070	5	6	4		147070	2	2	1
147170	4	5	4		147170	2	0	2
147270	5	4	5		147270	2	1	1
147370	2	4	4		147370	1	1	2
147470	4	3	5		147470	2	0	1
147570	4	3	5		147570	2	1	1
147670	3	4	6		147670	1	0	1
147770	3	3	4		147770	1	1	1
147870	4	4	4		147870	1	0	0
147970	5	4	3		147970	3	1	2
148070	3	5	4		148070	1	0	0
148170	4	4	5		148170	1	1	2
148270	5	5	6		148270	2	0	1
148370	3	4	5		148370	2	1	1
148470	4	5	5		148470	2	0	2
148570	4	4	5		148570	2	0	0
148670	4	5	3		148670	1	0	1
148770	4	3	5		148770	2	1	0
148870	4	4	5		148870	1	1	0
148970	3	4	7		148970	1	1	2
149070	4	3	5		149070	1	1	1
149170	5	4	4		149170	2	1	0
149270	4	5	5		149270	1	1	2
149370	4	4	6		149370	1	0	1
149470	5	4	4		149470	2	1	1
149570	5	4	4		149570	3	1	1
149670	4	4	4		149670	2	2	1
149770	4	4	4		149770	2	1	0
149870	5	3	4		149870	2	1	1
149970	3	4	6		149970	2	2	0
150070	3	4	4		150070	3	1	1
150170	3	3	5		150170	2	0	2
150270	3	3	5		150270	2	1	2
150370	4	4	4		150370	1	0	1
150470	5	5	4		150470	2	0	1
150570	5	3	5		150570	2	1	2
150670	4	3	3		150670	0	0	1
150770	3	4	5		150770	1	1	1
150870	4	4	4		150870	2	1	0
150970	3	4	3		150970	1	0	1
151070	4	4	4		151070	1	0	0
151170	4	4	4		151170	2	1	2
151270	3	5	4		151270	1	0	1
151370	5	4	5		151370	1	1	0
151470	3	3	5		151470	2	1	1
151570	4	3	5		151570	2	0	0
151670	4	3	5		151670	1	2	1
151770	5	4	4		151770	2	0	0
151870	4	4	4		151870	1	1	1
151970	4	3	5		151970	3	1	1
152070	4	3	6		152070	4	0	2
152170	3	5	4		152170	2	0	1
152270	4	5	5		152270	2	1	1
152370	4	4	4		152370	2	2	1
152470	4	4	4		152470	2	1	1
152570	3	3	6		152570	1	0	0
152670	5	4	6		152670	1	0	1
152770	4	4	5		152770	1	0	1
152870	4	4	5		152870	1	0	1
152970	5	4	4		152970	1	0	2
153070	4	4	6		153070	2	1	2
153170	4	3	5		153170	3	1	0
153270	3	4	6		153270	2	1	1
153370	4	3	6		153370	1	1	0
153470	4	4	6		153470	2	1	1
153570	4	4	5		153570	2	1	1
153670	4	3	5		153670	2	1	1
153770	4	4	4		153770	2	0	1
153870	4	4	5		153870	2	1	0
153970	4	4	4		153970	2	1	0
154070	4	3	6		154070	1	1	1
154170	5	4	4		154170	2	1	1
154270	4	5	5		154270	1	1	0
154370	4	3	4		154370	3	1	1
154470	3	4	5		154470	2	1	0
154570	5	4	4		154570	2	1	1
154670	4	3	4		154670	2	0	0
154770	4	3	4		154770	1	1	1
154870	4	4	4		154870	2	1	0
154970	3	4	5		154970	1	1	1
155070	4	4	6		155070	1	1	0
155170	4	5	4		155170	2	0	1
155270	4	4	3		155270	1	1	1
155370	4	4	6		155370	1	0	1
155470	4	4	4		155470	2	0	1
155570	4	4	5		155570	1	1	1
155670	4	5	6		155670	1	1	0
155770	4	4	5		155770	1	1	0
155870	3	4	5		155870	1	0	1
155970	3	5	4		155970	2	1	1
156070	3	3	5		156070	1	2	2
156170	4	4	4		156170	2	1	1
156270	4	4	6		156270	2	0	1
156370	4	6	4		156370	2	2	1
156470	4	5	4		156470	1	1	1
156570	3	3	7		156570	0	1	2
156670	4	4	4		156670	2	0	1
156770	4	3	4		156770	2	1	1
156870	4	3	5		156870	1	0	1
156970	4	3	5		156970	2	1	0
157070	4	5	5		157070	3	1	1
157170	4	4	6		157170	2	0	1
157270	4	4	5		157270	2	1	2
157370	4	3	5		157370	1	1	1
157470	5	5	5		157470	2	1	1
157570	4	5	3		157570	1	1	1
157670	4	4	4		157670	2	1	3
157770	4	5	5		157770	1	1	1
157870	4	6	5		157870	1	1	1
157970	3	3	4		157970	1	1	1
158070	3	4	4		158070	0	0	1
158170	3	4	4		158170	1	1	1
158270	4	4	4		158270	1	0	1
158370	4	4	5		158370	1	1	1
158470	4	4	4		158470	1	0	2
158570	4	4	5		158570	1	1	2
158670	4	3	7		158670	1	0	1
158770	4	4	4		158770	2	0	2
158870	4	4	5		158870	1	1	1
158970	4	4	5		158970	1	1	2
159070	4	4	4		159070	1	1	2
159170	4	5	4		159170	1	0	1
159270	5	5	5		159270	2	1	1
159370	4	4	5		159370	3	0	0
159470	4	4	5		159470	1	0	2
159570	4	4	5		159570	2	0	1
159670	5	5	5		159670	3	0	1
159770	4	4	5		159770	1	0	1
159870	4	4	5		159870	1	1	1
159970	2	4	5		159970	2	1	0
160070	3	5	6		160070	1	0	2
160170	4	3	5		160170	1	1	1
160270	4	5	6		160270	1	1	1
160370	4	4	4		160370	1	1	1
160470	3	3	5		160470	1	0	2
160570	3	3	6		160570	2	1	1
160670	5	5	3		160670	1	1	1
160770	3	3	5		160770	3	1	1
160870	4	5	6		160870	1	0	1
160970	4	5	7		160970	2	0	1
161070	5	4	5		161070	2	1	2
161170	3	4	4		161170	2	0	2
161270	3	4	3		161270	2	1	0
161370	5	4	4		161370	0	1	1
161470	4	4	4		161470	2	0	0
161570	3	3	5		161570	2	0	1
161670	4	4	5		161670	1	1	0
161770	4	3	5		161770	2	2	1
161870	4	4	4		161870	2	1	0
161970	3	3	5		161970	2	1	1
162070	4	4	4		162070	2	1	1
162170	3	4	5		162170	2	0	1
162270	3	4	4		162270	0	0	2
162370	4	3	4		162370	0	1	1
162470	3	4	5		162470	2	1	0
162570	5	3	6		162570	2	1	1
162670	4	4	6		162670	1	1	1
162770	4	4	5		162770	2	2	0
162870	4	4	4		162870	1	1	1
162970	4	5	4		162970	0	0	0
163070	4	4	6		163070	1	1	0
163170	4	5	5		163170	1	0	1
163270	4	4	5		163270	2	1	0
163370	4	4	4		163370	1	1	0
163470	4	5	5		163470	2	1	1
163570	5	4	4		163570	1	0	1
163670	4	5	4		163670	2	1	0
163770	4	4	5		163770	1	1	1
163870	4	4	4		163870	1	1	1
163970	3	3	5		163970	1	0	0
164070	4	4	4		164070	2	2	1
164170	3	5	5		164170	1	1	1
164270	3	3	5		164270	2	2	1
164370	4	4	5		164370	2	2	0
164470	3	5	4		164470	1	1	1
164570	4	3	4		164570	1	0	2
164670	5	4	7		164670	1	1	0
164770	4	4	4		164770	1	0	1
164870	4	3	4		164870	1	0	1
164970	5	4	4		164970	2	0	1
165070	4	3	5		165070	1	1	1
165170	4	3	5		165170	1	0	2
165270	4	5	4		165270	2	0	1
165370	3	4	4		165370	3	0	1
165470	4	4	5		165470	1	0	2
165570	3	4	4		165570	2	0	1
165670	4	5	4		165670	2	0	2
165770	3	3	4		165770	1	0	1
165870	4	4	5		165870	1	0	0
165970	4	4	6		165970	1	0	1
166070	3	4	5		166070	0	1	0
166170	4	3	4		166170	1	0	2
166270	3	3	5		166270	1	0	0
166370	3	4	5		166370	2	0	1
166470	4	4	4		166470	0	0	0
166570	4	4	4		166570	1	1	2
166670	4	4	4		166670	1	1	1
166770	4	5	4		166770	3	0	1
166870	2	4	4		166870	2	0	1
166970	4	4	5		166970	2	1	1
167070	3	4	5		167070	0	1	1
167170	3	4	4		167170	0	0	2
167270	4	4	5		167270	1	0	2
167370	4	3	5		167370	1	0	1
167470	4	4	7		167470	1	1	1
167570	4	4	5		167570	0	1	1
167670	3	5	3		167670	3	1	1
167770	3	3	6		167770	1	1	1
167870	4	5	5		167870	1	0	0
167970	4	4	4		167970	2	1	1
168070	4	4	5		168070	1	1	1
168170	4	5	6		168170	2	0	1
168270	5	4	3		168270	2	0	1
168370	3	3	5		168370	1	0	2
168470	4	5	4		168470	1	0	1
168570	3	3	5		168570	1	1	1
168670	4	3	4		168670	1	0	1
168770	3	4	4		168770	1	1	1
168870	3	6	3		168870	2	0	1
168970	4	4	5		168970	1	0	1
169070	4	4	5		169070	1	0	1
169170	3	4	4		169170	2	1	1
169270	5	4	6		169270	1	1	1
169370	3	4	4		169370	1	1	1
169470	3	3	5		169470	1	1	1
169570	3	5	5		169570	0	0	1
169670	3	3	4		169670	1	0	1
169770	4	4	4		169770	1	0	0
169870	5	4	5		169870	0	0	0
169970	4	4	4		169970	1	0	1
170070	4	3	4		170070	2	0	0
170170	4	4	6		170170	2	0	1
170270	3	3	5		170270	0	0	1
170370	4	5	5		170370	1	0	2
170470	4	4	6		170470	0	1	1
170570	4	4	5		170570	1	1	1
170670	3	4	4		170670	2	0	0
170770	4	4	5		170770	2	0	0
170870	4	5	5		170870	0	0	2
170970	4	3	4		170970	1	1	1
171070	3	4	4		171070	1	1	1
171170	4	4	5		171170	1	0	1
171270	4	4	4		171270	0	0	1
171370	3	4	5		171370	2	0	1
171470	5	3	5		171470	1	1	2
171570	4	3	6		171570	2	0	1
171670	3	4	4		171670	1	0	0
171770	5	4	5		171770	2	0	0
171870	3	4	4		171870	1	0	0
171970	3	4	6		171970	1	1	2
172070	3	5	4		172070	2	1	1
172170	4	4	4		172170	1	1	1
172270	4	3	5		172270	1	1	2
172370	4	3	4		172370	0	0	0
172470	4	5	4		172470	1	1	1
172570	4	3	5		172570	2	0	0
172670	4	3	5		172670	0	1	0
172770	4	4	4		172770	1	0	1
172870	3	3	6		172870	1	1	0
172970	4	3	5		172970	0	0	0
173070	5	4	4		173070	1	0	1
173170	2	5	5		173170	1	0	0
173270	4	5	5		173270	1	0	2
173370	4	3	5		173370	1	0	1
173470	4	5	5		173470	1	0	1
173570	4	4	4		173570	1	1	0
173670	3	4	4		173670	1	0	0
173770	4	4	5		173770	0	1	1
173870	3	4	4		173870	1	1	1
173970	3	3	4		173970	1	1	1
174070	4	4	4		174070	1	0	0
174170	3	5	4		174170	1	0	1
174270	3	5	5		174270	1	1	1
174370	4	4	5		174370	0	1	1
174470	4	4	4		174470	0	1	1
174570	3	4	5		174570	1	0	1
174670	3	4	3		174670	1	0	1
174770	4	5	5		174770	1	0	2
174870	3	4	5		174870	2	1	2
174970	4	4	5		174970	1	1	1
175070	4	4	4		175070	1	0	1
175170	3	3	5		175170	1	1	0
175270	4	3	5		175270	0	0	0
175370	5	5	5		175370	2	0	1
175470	4	4	4		175470	1	1	1
175570	4	6	5		175570	1	0	1
175670	5	4	5		175670	0	1	1
175770	3	3	4		175770	2	0	1
175870	2	4	5		175870	1	1	1
175970	3	4	7		175970	1	0	0
176070	3	4	5		176070	1	0	0
176170	3	3	4		176170	1	1	1
176270	4	4	4		176270	1	1	1
176370	3	4	5		176370	1	0	1
176470	3	4	5		176470	2	0	0
176570	3	3	5		176570	1	0	0
176670	3	3	5		176670	2	0	1
176770	4	4	4		176770	1	1	1
176870	2	4	5		176870	1	1	1
176970	4	5	4		176970	1	1	0
177070	4	3	5		177070	1	0	1
177170	4	4	4		177170	1	1	2
177270	4	3	5		177270	1	1	1
177370	4	5	4		177370	0	0	1
177470	5	4	5		177470	1	0	2
177570	4	4	5		177570	1	0	1
177670	3	4	6		177670	1	1	0
177770	4	3	3		177770	1	0	2
177870	3	4	6		177870	0	0	1
177970	3	5	4		177970	1	0	1
178070	4	4	4		178070	1	0	2
178170	3	6	5		178170	3	0	1
178270	4	3	5		178270	0	0	1
178370	4	5	6		178370	1	0	1
178470	2	4	6		178470	1	0	2
178570	3	3	4		178570	4	1	1
178670	3	4	5		178670	1	0	0
178770	3	4	5		178770	0	0	1
178870	5	4	4		178870	0	0	1
178970	3	4	5		178970	1	0	1
179070	3	4	5		179070	1	0	1
179170	3	4	5		179170	1	0	2
179270	4	4	4		179270	1	0	2
179370	2	4	4		179370	1	0	0
179470	4	4	6		179470	1	1	0
179570	3	3	4		179570	1	0	0
179670	3	3	4		179670	2	1	1
179770	3	3	4		179770	2	0	1
179870	4	5	5		179870	1	0	1
179970	4	4	5		179970	1	1	2
180070	4	4	5		180070	1	1	1
180170	4	3	5		180170	0	0	0
180270	4	4	5		180270	1	0	1
180370	4	3	4		180370	1	1	1
180470	3	5	5		180470	1	1	1
180570	3	4	4		180570	1	0	1
180670	3	4	5		180670	0	0	2
180770	3	3	5		180770	0	1	1
180870	3	4	5		180870	0	1	1
180970	3	3	6		180970	1	0	1
181070	5	4	3		181070	1	0	1
181170	3	4	4		181170	1	0	0
181270	3	4	5		181270	1	0	1
181370	4	3	4		181370	0	2	1
181470	4	4	5		181470	1	1	2
181570	4	4	4		181570	1	1	1
181670	4	4	7		181670	2	1	1
181770	4	4	5		181770	1	1	2
181870	3	5	4		181870	3	0	2
181970	4	4	5		181970	0	1	1
182070	4	5	6		182070	2	0	1
182170	4	4	5		182170	1	0	1
182270	5	4	4		182270	1	1	0
182370	3	5	4		182370	1	0	1
182470	3	4	4		182470	1	1	1
182570	4	4	4		182570	1	0	2
182670	3	4	5		182670	1	0	1
182770	4	3	5		182770	1	1	0
182870	3	4	4		182870	1	0	1
182970	4	4	5		182970	0	0	1
183070	5	5	5		183070	1	0	1
183170	3	4	5		183170	2	0	2
183270	3	3	4		183270	1	0	0
183370	4	3	4		183370	1	0	1
183470	3	3	5		183470	2	0	1
183570	4	5	4		183570	2	1	1
183670	4	4	5		183670	0	0	1
183770	4	3	6		183770	0	1	0
183870	4	4	4		183870	2	0	1
183970	4	3	4		183970	1	0	1
184070	4	5	5		184070	1	0	0
184170	4	4	5		184170	1	0	1
184270	3	4	4		184270	1	0	1
184370	3	4	5		184370	1	1	1
184470	3	4	5		184470	3	0	1
184570	5	4	5		184570	1	0	0
184670	3	4	5		184670	2	0	0
184770	3	4	4		184770	1	1	0
184870	4	5	5		184870	1	0	0
184970	3	4	3		184970	1	0	1
185070	4	3	5		185070	1	0	1
185170	5	4	5		185170	0	0	0
185270	4	4	4		185270	1	0	1
185370	4	3	5		185370	1	1	1
185470	4	3	5		185470	2	0	1
185570	3	4	5		185570	0	0	2
185670	4	3	6		185670	1	0	2
185770	5	3	4		185770	1	0	0
185870	4	4	5		185870	1	0	1
185970	3	4	5		185970	2	0	0
186070	3	4	6		186070	1	1	1
186170	3	3	4		186170	1	1	1
186270	3	5	5		186270	1	0	0
186370	3	4	5		186370	1	1	0
186470	3	5	4		186470	0	1	1
186570	4	4	4		186570	0	0	1
186670	5	4	6		186670	1	0	2
186770	4	3	6		186770	1	0	1
186870	3	4	5		186870	1	0	0
186970	4	4	3		186970	0	0	1
187070	4	4	5		187070	1	1	2
187170	3	4	5		187170	1	0	1
187270	5	4	4		187270	2	1	1
187370	4	3	6		187370	1	1	1
187470	3	5	5		187470	0	0	0
187570	3	5	5		187570	1	0	1
187670	3	4	6		187670	1	0	1
187770	5	4	4		187770	1	0	1
187870	4	4	4		187870	1	1	2
187970	4	3	5		187970	0	0	0
188070	4	5	5		188070	1	0	0
188170	3	4	5		188170	0	0	1
188270	4	4	6		188270	1	0	1
188370	3	3	5		188370	1	1	2
188470	4	3	7		188470	2	1	1
188570	3	4	4		188570	1	0	1
188670	4	4	4		188670	1	0	1
188770	5	4	6		188770	0	0	1
188870	5	4	5		188870	1	0	0
188970	3	4	5		188970	0	0	1
189070	4	4	6		189070	1	0	1
189170	4	4	5		189170	1	0	1
189270	3	3	5		189270	1	0	0
189370	3	3	4		189370	0	1	1
189470	3	3	5		189470	0	1	1
189570	3	4	4		189570	2	1	0
189670	4	3	6		189670	0	0	0
189770	4	4	5		189770	2	0	1
189870	5	5	6		189870	1	0	1
189970	3	5	5		189970	1	0	0
190070	3	6	4		190070	1	0	1
190170	3	4	6		190170	1	2	1
190270	4	4	3		190270	1	0	2
190370	3	4	5		190370	1	0	1
190470	3	4	4		190470	1	1	1
190570	4	4	5		190570	0	0	0
190670	3	3	6		190670	1	0	1
190770	4	4	4		190770	1	0	1
190870	3	4	5		190870	1	0	0
190970	3	3	5		190970	0	0	1
191070	4	4	6		191070	0	1	0
191170	4	4	5		191170	0	0	1
191270	4	4	4		191270	0	0	1
191370	4	5	5		191370	1	1	0
191470	3	3	5		191470	1	0	0
191570	4	3	5		191570	1	1	0
191670	2	3	5		191670	1	0	1
191770	4	4	6		191770	0	0	1
191870	3	3	6		191870	1	1	1
191970	3	4	4		191970	1	0	0
192070	3	4	5		192070	0	0	0
192170	4	3	4		192170	2	0	1
192270	3	4	5		192270	0	0	1
192370	4	4	7		192370	1	0	1
192470	4	3	4		192470	0	0	0
192570	4	4	4		192570	1	1	1
192670	5	4	5		192670	0	1	1
192770	5	3	5		192770	1	0	1
192870	4	5	5		192870	1	1	1
192970	4	3	4		192970	1	0	1
193070	3	4	4		193070	1	1	1
193170	3	3	4		193170	2	1	0
193270	4	3	5		193270	1	1	1
193370	3	4	5		193370	0	1	1
193470	3	5	4		193470	0	0	1
193570	4	5	5		193570	0	2	1
193670	4	5	4		193670	1	0	1
193770	3	4	4		193770	1	0	1
193870	3	3	5		193870	1	0	1
193970	3	5	3		193970	1	0	0
194070	5	3	5		194070	0	0	1
194170	4	3	5		194170	0	0	2
194270	4	4	4		194270	0	0	1
194370	3	5	4		194370	0	1	1
194470	4	4	4		194470	1	0	1
194570	4	4	5		194570	1	0	1
194670	4	4	5		194670	1	1	1
194770	4	4	4		194770	1	0	0
194870	4	3	3		194870	2	1	1
194970	4	4	5		194970	1	0	0
195070	4	5	5		195070	1	0	0
195170	4	4	4		195170	0	0	1
195270	3	4	5		195270	0	1	1
195370	4	3	4		195370	1	0	1
195470	3	3	5		195470	0	0	1
195570	3	4	7		195570	1	0	1
195670	3	4	6		195670	0	1	1
195770	3	4	6		195770	1	0	1
195870	4	4	4		195870	0	0	1
195970	4	4	5		195970	1	1	2
196070	4	3	4		196070	0	0	1
196170	4	3	5		196170	1	0	1
196270	3	5	4		196270	2	0	0
196370	4	2	6		196370	1	0	1
196470	4	5	5		196470	1	0	1
196570	4	5	4		196570	1	1	0
196670	3	4	4		196670	0	0	1
196770	3	3	4		196770	0	0	1
196870	4	4	6		196870	1	0	1
196970	3	3	7		196970	1	0	1
197070	3	4	4		197070	1	0	2
197170	3	3	5		197170	0	1	0
197270	4	4	6		197270	0	1	0
197370	4	5	4		197370	0	1	0
197470	4	3	4		197470	1	1	1
197570	4	4	5		197570	0	1	1
197670	3	4	6		197670	1	0	1
197770	3	4	4		197770	0	1	2
197870	3	4	4		197870	1	1	1
197970	4	4	4		197970	0	1	0
198070	4	4	4		198070	1	0	1
198170	3	4	5		198170	0	0	0
198270	3	5	4		198270	0	0	1
198370	4	4	5		198370	0	1	0
198470	5	5	5		198470	1	0	1
198570	3	3	4		198570	1	1	1
198670	3	4	5		198670	1	0	1
198770	4	3	5		198770	0	0	0
198870	4	3	5		198870	1	0	1
198970	4	4	4		198970	1	1	0
199070	2	5	4		199070	1	0	1
199170	3	4	4		199170	0	1	1
199270	4	4	5		199270	1	0	1
199370	3	3	5		199370	1	1	1
199470	4	4	6		199470	1	1	1
199570	5	4	4		199570	0	1	1
199670	3	3	5		199670	0	0	0
199770	3	5	4		199770	1	1	0
199870	4	4	4		199870	0	0	1
199970	3	3	4		199970	0	1	0
200070	4	5	5		200070	1	0	0
200170	4	5	4		200170	1	1	0
200270	4	3	5		200270	1	0	1
[truncated: 1,002 more rows]
