# Supplementary material for: Impact of energy limitations on function and resilience in long-wavelength Photosystem II
Source: eLife. 2022 Jul 19;11:e79890. doi: 10.7554/eLife.79890 (PMC9439682; doi:10.7554/eLife.79890)
Supplement: Figure 6—figure supplement 1—source data 1. [file elife-79890-fig6-figsupp1-data1.xlsx]

## Sheet: Synechocystis
Synechocystis
	Acceptors	DCMU	DCMU+Histidine
-60	-0.000405578	-4.14139e-05	-0.000585
-59.5	-8.54195e-05	-4.00518e-05	-0.00089
-59	-0.000107259	-0.00015419	-0.000131478
-58.5	-0.000205432	-0.000152828	-0.00020769
-58	-0.000151689	-3.59653e-05	0.000398599
-57.5	-0.000211168	-0.000265603	0.000170387
-57	0.000108132	-0.000148741	-0.000209825
-56.5	0.000199792	-0.000147379	0.000396464
-56	0.000215952	-3.05167e-05	-0.000211248
-55.5	0.000193612	-2.91546e-05	-0.00082
-55	1.97728e-05	-0.000143293	-0.000137172
-54.5	-7.71258e-05	8.907e-05	-0.000137884
-54	-0.000138157	-2.50681e-05	-0.000290095
-53.5	0.000143254	0.000207294	-0.000214807
-53	4.54137e-05	-2.23438e-05	-0.000367519
-52.5	0.000442152	0.000210019	1.12695e-05
-52	1.484e-06	-1.96195e-05	-0.000141442
-51.5	-2.06057e-05	0.000212743	0.000237846
-51	-0.000270446	-0.000247895	0.000161134
-50.5	-0.000292535	0.000215467	8.44225e-05
-50	-0.000275688	-0.000361171	-0.000295789
-49.5	-0.000222715	-1.28087e-05	-0.000296501
-49	2.09455e-05	-0.000473947	-0.000525
-48.5	-7.71442e-05	-0.000125584	8.15755e-05
-48	0.000318516	-0.000471222	4.86398e-06
-47.5	-0.000197074	-0.00012286	0.000232152
-47	0.000388336	-0.000468498	-0.000376059
-46.5	-1.35033e-05	-0.000235636	2.7288e-06
-46	-3.5882e-05	0.000227726	0.000457517
-45.5	-9.54328e-05	-0.000117412	-7.46945e-05
-45	0.000148228	0.000114951	0.000380093
-44.5	0.000316138	-0.000230187	-0.00053
-44	0.00056	2.17507e-06	-0.000685
-43.5	0.000309708	-0.000343463	-0.000305041
-43	0.000249868	4.89938e-06	-0.000229754
-42.5	0.000227778	-0.000456238	-0.000154965
-42	-0.000174061	-0.000107877	-7.96765e-05
-41.5	3.1293e-05	-0.00057	0.000299611
-41	-0.000179312	-0.000105152	-0.000535
-40.5	-1.23308e-05	-0.00045079	0.000449688
-40	0.00026933	-0.000217928	0.000221477
-39.5	0.00020949	-0.000565	-0.000234736
-39	0.00018715	1.57967e-05	-0.000159947
-38.5	0.00031706	-0.00056	-8.4659e-05
-38	-0.000160529	-0.000328479	-0.000995
-37.5	-3.06193e-05	-0.00056	-0.000162083
-37	-0.000356459	-0.000555	-0.000845
-36.5	-0.000188549	-0.000555	6.44945e-05
-36	-0.000286638	2.39696e-05	-0.00062
-35.5	-0.000309368	2.53318e-05	0.00052
-35	4.8932e-05	2.66939e-05	0.000138359
-34.5	0.000140404	-8.7444e-05	-1.43527e-05
-34	-0.000184998	-8.6082e-05	0.000212935
-33.5	-9.33372e-05	-8.47195e-05	-0.000167776
-33	-7.7177e-05	0.000147643	-1.64878e-05
-32.5	-6.1517e-05	-8.19955e-05	-0.0001692
-32	0.00033458	3.48669e-05	-0.000169912
-31.5	0.000274054	-0.000194771	-0.000170623
-31	0.000365964	0.000268591	-0.000474835
-30.5	0.00042021	-0.000192047	0.000207953
-30	0.000359943	0.000155815	0.000283242
-29.5	7.19445e-05	-0.000305323	0.00035803
-29	0.000276999	0.00015854	0.000281818
-28.5	-1e-05	-0.000535	0.000281107
-28	0.000386056	-0.000185236	5.2395e-05
-27.5	0.000172584	-0.00053	-0.000705
-27	0.000493246	4.84884e-05	-0.000252529
-26.5	-6.0344e-05	-0.000297149	-2.57403e-05
-26	0.000488147	0.000282213	-0.00071
-25.5	0.000275227	-0.000178425	0.000124837
-25	0.000177137	0.000400437	-0.000635
-24.5	-0.000109707	-0.000175701	0.000275413
-24	0.000170957	0.000403161	4.67011e-05
-23.5	0.000338617	-0.000172977	-0.000106011
-23	5.10278e-05	5.93855e-05	-0.000334223
-22.5	-0.0001225	-0.000401752	-0.000258934
-22	-0.000486105	0.00029311	-3.21458e-05
-21.5	-0.00104	-0.000283528	0.000195142
-21	-0.0007975	-0.000282165	-3.35693e-05
-20.5	-0.00101	-0.000280804	-3.4281e-05
-20	-0.000687269	-0.000279442	-3.49927e-05
-19.5	-6.53507e-05	-0.000393579	-0.000491205
-19	-4.96904e-05	-0.000160717	0.000419084
-18.5	-7.15302e-05	-0.000275355	0.00057
-18	-5.562e-05	-4.24927e-05	0.000645
-17.5	-3.97098e-05	-0.00038813	0.000416949
-17	-9.97995e-05	-0.000155269	0.000416237
-16.5	0.000219861	0.000192594	0.000112025
-16	0.000198021	7.8456e-05	-4.06866e-05
-15.5	-0.000128069	0.000195318	-0.000117399
-15	0.000494301	8.118e-05	-0.00026961
-14.5	0.000321502	8.25425e-05	-0.000270322
-14	0.000375065	-3.15955e-05	0.000335967
-13.5	0.000391447	8.52665e-05	3.17548e-05
-13	0.000407233	-2.88712e-05	0.000107043
-12.5	-0.000450039	-2.75091e-05	0.000485832
-12	-0.000206447	-2.61469e-05	0.00010562
-11.5	-0.000152537	9.07155e-05	0.00056
-11	-6.06267e-05	-2.34226e-05	-0.000275304
-10.5	-4.47165e-05	0.00020894	2.74845e-05
-10	9.19375e-06	-2.06983e-05	-0.000885
-9.5	0.000214253	0.000211664	0.000102061
-9	0.000267635	-0.000133474	0.000177349
-8.5	0.000398017	0.000214388	0.000176638
-8	-0.000154915	-0.00013075	-0.00051
-7.5	-0.000328219	0.000217113	0.000705
-7	2.86553e-05	0.000218475	9.85025e-05
-6.5	0.000120566	0.000565	0.00063
-6	0.000250226	-9.801e-06	-0.00051
-5.5	0.000342809	0.000453561	0.000172367
-5	9.22962e-05	0.000108424	-0.000435845
-4.5	-0.000119793	0.000456286	-0.000209057
-4	0.000200117	0.000111148	-0.000285268
-3.5	0.000292837	0.00034351	-0.000515
-3	5e-06	0.000229372	9.28085e-05
-2.5	0.000474351	0.000230734	-0.000363403
-2	0.0007575	0.000232096	0.000318885
-1.5	0.000393418	0.000348959	-0.000137326
-1	0.000371578	0.000234821	-0.000441539
-0.5	0.00019711	0.000236182	-0.00136
0	0.000744261	0.000237545	-0.000595
0.5	0.000343059	0.000238907	-0.0009
1	0.000283219	0.000124769	-0.00113
1.5	0.000413657	0.000241632	-0.000975
2	0.000467039	0.000127493	-0.0012
2.5	0.000596421	0.000475356	-0.00113
3	0.000611803	0.000595	-0.00075
3.5	0.000591185	-9.942e-05	-0.000905
4	0.000341317	0.000595	-0.000905
4.5	0.000432199	0.000134305	-0.00113
5	0.000486831	0.000482167	-0.0006
5.5	0.000653713	0.000137029	-0.000525
6	0.000669095	0.0006	-0.000985
6.5	0.000722977	0.000370753	-0.000985
7	0.00116	0.000372115	-0.000755
7.5	0.0009475	-8.8523e-05	-0.000605
8	0.00069609	0.000259339	-0.00045435
8.5	0.00117	0.000376202	-0.000379061
9	0.00107	0.000146564	-0.000379773
9.5	0.00154	0.000378926	-0.00076
10	0.00136	0.000380288	-0.00076
10.5	0.00173	0.00049715	-0.00107
11	0.0014	0.000383013	-0.00061
11.5	0.00176	0.000384375	-0.00084
12	0.00189	0.000270236	-0.000232543
12.5	0.00156	4.05988e-05	-0.000535
13	0.00188	0.00085	7.00335e-05
13.5	0.00152	0.000389823	-0.000310178
14	0.00199	0.00074	-8.339e-05
14.5	0.00193	0.00051	-0.000615
15	0.00221	0.00074	-0.000388314
15.5	0.00203	0.000395272	-0.000845
16	0.00216	0.00086	-0.00062
16.5	0.00207	0.000397996	-0.00077
17	0.00231	0.00086	-0.00123
17.5	0.00233	0.000515	-0.000845
18	0.00257	0.00075	-0.000468584
18.5	0.0027	0.00052	-0.000317296
19	0.00298	0.00075	-0.000470008
19.5	0.00315	0.00064	-0.000625
20	0.00328	0.00064	-0.00116
20.5	0.00299	0.000525	-0.000775
21	0.0032	0.000525	-0.00055
21.5	0.00344	0.000525	-0.00153
22	0.00338	0.00053	-0.00055
22.5	0.00374	0.00076	0.000284011
23	0.00372	0.000765	-0.000172201
23.5	0.00404	0.000765	0.000207087
24	0.00386	0.00088	0.000206376
24.5	0.00392	0.000765	-0.000250336
25	0.00366	0.000885	-0.00078
25.5	0.00395	0.00077	-0.000555
26	0.00351	0.000885	-0.00109
26.5	0.00421	0.00077	-0.00071
27	0.00438	0.00101	-0.00117
27.5	0.00455	0.00066	-0.000406107
28	0.00471	0.00101	-0.000785
28.5	0.00477	0.00066	-0.00102
29	0.00482	0.00112	-0.00056
29.5	0.0048	0.00055	-0.00125
30	0.00436	0.00113	-0.00148
30.5	0.0049	0.00067	-0.000334377
31	0.00481	0.00102	-0.000715
31.5	0.00513	0.00067	-0.0004878
32	0.00541	0.00102	-0.00087
32.5	0.00561	0.000675	-0.000185724
33	0.00551	0.00102	-0.000795
33.5	0.00557	0.000905	-0.000490648
34	0.00581	0.000330171	-0.00103
34.5	0.00575	0.00091	-0.0011
35	0.0063	0.00091	-0.00148
35.5	0.00628	0.00091	-0.0011
36	0.00656	0.0008	-0.00118
36.5	0.00654	0.000915	-0.000725
37	0.00682	0.000338344	-0.000725
37.5	0.0068	0.00092	-4.08414e-05
38	0.00693	0.000456569	-0.000497053
38.5	0.0069	0.00092	-0.000497765
39	0.00688	0.000459293	-0.00088
39.5	0.00686	0.000925	-0.000805
40	0.00699	0.00058	-0.00088
40.5	0.00686	0.00081	-0.000805
41	0.00732	0.000695	-0.00103
41.5	0.00715	0.0007	-0.00103
42	0.0077	0.000815	-0.00088
42.5	0.00749	0.00093	-0.00073
43	0.00788	0.000123691	-0.00012467
43.5	0.00786	0.00082	-0.000735
44	0.00776	0.000472915	-0.000353594
44.5	0.00801	0.00082	-0.000430305
45	0.00795	0.000475639	-0.00066
45.5	0.008	0.00071	-0.000585
46	0.00851	0.000362864	-0.000585
46.5	0.00856	0.00094	-0.000815
47	0.00866	0.000365588	-0.000965
47.5	0.00886	0.000945	9.6924e-05
48	0.00911	0.000252812	-0.000207788
48.5	0.00939	0.00083	-0.000815
49	0.00898	0.0006	-0.0012
49.5	0.00953	0.000835	-0.00104
50	0.00955	0.000489261	-0.00074
50.5	0.00922	0.00084	-0.00082
51	0.00962	0.00084	-0.000515
51.5	0.0096	0.000955	0.000242731
52	0.00954	0.000379209	-0.000137481
52.5	0.00959	0.00096	1.38069e-05
53	0.00972	0.000497433	-0.000975
53.5	0.00996	0.000845	-0.000595
54	0.0101	0.0005	-0.00075
54.5	0.01026	0.00085	-0.000975
55	0.01039	0.000735	-0.00113
55.5	0.01049	0.000965	-0.0009
56	0.01069	0.000735	-0.000446675
56.5	0.01074	0.000855	-0.000295887
57	0.0108	0.00074	-0.000220599
57.5	0.01093	0.00074	-0.00098
58	0.01098	0.000745	-0.00098
58.5	0.01107	0.00086	-0.00121
59	0.0112	0.000745	-0.000374946
59.5	0.01137	0.000745	-0.00106
60	0.01146	0.00075	-0.000452369
60.5	0.01163	0.000865	-0.000225581
61	0.01184	0.00075	-0.00068
61.5	0.01197	0.000635	-0.00106
62	0.01198	0.00052	-0.00114
62.5	0.01223	0.00064	-0.00091
63	0.01228	0.000525	-0.00099
63.5	0.01188	0.000875	-0.000835
64	0.01239	0.000525	-0.00061
64.5	0.01214	0.000875	-0.000535
65	0.01257	0.00053	-0.000765
65.5	0.01232	0.00088	-0.000308698
66	0.01253	0.000535	-0.00115
66.5	0.01269	0.00088	-0.000615
67	0.01275	0.000420074	-0.00176
67.5	0.01307	0.001	-0.00176
68	0.01312	0.000655	-0.000995
68.5	0.01303	0.001	-0.000845
69	0.0133	0.000775	-0.000615
69.5	0.01321	0.00089	-0.00062
70	0.01341	0.00066	-0.00108
70.5	0.01339	0.000314109	-0.00123
71	0.01341	0.00078	-0.00145
71.5	0.01372	0.000895	-0.00161
72	0.01374	0.000318196	-0.00123
72.5	0.01418	-2.74424e-05	-0.00145
73	0.01408	0.00032092	-0.00116
73.5	0.01409	9.1282e-05	-0.00101
74	0.01457	0.000439144	-0.000775
74.5	0.01435	-2.19937e-05	-0.00138
75	0.0141	0.000326369	-0.00153
75.5	0.01439	-0.00013477	-0.00116
76	0.01467	0.000444593	-0.00199
76.5	0.01487	-1.65451e-05	-0.00146
77	0.015	0.000447317	-0.00199
77.5	0.01475	-1.38208e-05	-0.00154
78	0.01523	0.000334542	-0.000935
78.5	0.01543	-0.000357597	-0.000785
79	0.01549	0.000221766	-0.00117
79.5	0.01557	0.000107628	-0.00124
80	0.01578	0.00033999	-0.00139
80.5	0.01549	0.000110352	-0.00169
81	0.01585	-4.28573e-06	-0.00185
81.5	0.01556	0.000228577	-0.00185
82	0.01585	-1.56142e-06	-0.00094
82.5	0.01574	0.000115801	-0.00117
83	0.01603	0.000117163	-0.000715
83.5	0.016	2.52506e-06	-0.0011
84	0.01621	0.000235387	-0.000715
84.5	0.01592	0.00012125	-0.00125
85	0.01658	0.000238112	-0.0011
85.5	0.01683	7.9737e-06	-0.00163
86	0.01696	0.000125336	-0.00133
86.5	0.01709	-0.000104802	-0.00156
87	0.01714	0.00012806	-0.000490802
87.5	0.01723	1.34223e-05	-0.00125
88	0.01744	0.000130785	-0.000795
88.5	0.01738	0.000132147	-0.00171
89	0.01751	0.000364509	-0.00118
89.5	0.01741	0.000250371	-0.00156
90	0.01754	0.0006	-0.00141
90.5	0.01756	0.000368596	-0.00141
91	0.01773	0.000138958	-0.00118
91.5	0.01804	2.43196e-05	-0.00126
92	0.01791	0.000257182	-0.00171
92.5	0.0183	2.70439e-05	-0.00149
93	0.01828	0.000144406	-0.00164
93.5	0.01876	2.97682e-05	-0.0027
94	0.01831	0.00014713	-0.00202
94.5	0.01867	0.000148492	-0.00194
95	0.01835	3.38547e-05	-0.00232
95.5	0.01848	3.52168e-05	-0.00119
96	0.01861	3.6579e-05	-0.00119
96.5	0.01855	0.000153941	-0.00149
97	0.01875	0.000270804	-0.00279
97.5	0.01865	0.000156666	-0.00127
98	0.01909	0.000273527	-0.00241
98.5	0.01899	4.33897e-05	-0.00112
99	0.0195	0.000276252	-0.00173
99.5	0.01936	-6.9386e-05	-0.0015
100	0.01961	0.000278976	-0.00127
100.5	0.01973	4.88384e-05	-0.00173
101	0.0196	0.000281701	-0.00173
101.5	0.01992	-6.39375e-05	-0.00203
102	0.01959	0.000284425	-0.00196
102.5	0.01991	-0.000176713	-0.00135
103	0.01997	0.000171649	-0.0015
103.5	0.0201	-0.000173989	-0.00097
104	0.0203	0.000289874	-0.0012
104.5	0.02051	-0.000171265	-0.00211
105	0.02041	0.000177098	-0.00143
105.5	0.02066	-5.304e-05	-0.00242
106	0.02037	6.3822e-05	-0.00196
106.5	0.02068	6.51845e-05	-0.00181
107	0.02032	0.000298047	-0.00181
107.5	0.0208	6.79085e-05	-0.00174
108	0.02058	0.000185271	-0.00174
108.5	0.02083	-4.48671e-05	-0.00181
109	0.02073	7.1995e-05	-0.00234
109.5	0.0209	7.3357e-05	-0.00174
110	0.02114	7.47195e-05	-0.00242
110.5	0.02116	7.60815e-05	-0.00151
111	0.0214	0.000308944	-0.00182
111.5	0.02141	7.8806e-05	-0.00144
112	0.02135	0.000311668	-0.00152
112.5	0.0216	-3.39698e-05	-0.00152
113	0.02143	0.000429892	-0.00182
113.5	0.02178	-3.12456e-05	-0.00281
114	0.02157	8.56165e-05	-0.00213
114.5	0.02189	-2.85212e-05	-0.0025
115	0.02221	0.000435341	-0.00205
115.5	0.0223	-0.000256797	-0.00243
116	0.02254	0.000438065	-0.00198
116.5	0.02237	-0.000138573	-0.00198
117	0.02262	0.000440789	-0.00183
117.5	0.02271	-0.000251348	-0.00235
118	0.02261	0.00056	-0.0019
118.5	0.02296	-0.000133124	-0.00266
119	0.02298	0.000446238	-0.0016
119.5	0.02338	-1.48997e-05	-0.0016
120	0.02301	0.000333462	-0.00122
120.5	0.02333	0.000334825	-0.00153
121	0.0232	0.000685	-0.0016
121.5	0.02352	0.000337549	-0.00206
122	0.0233	0.000685	-0.00229
122.5	0.02359	0.000224774	-0.00214
123	0.02338	0.000226136	-0.00168
123.5	0.02377	0.000227497	-0.00161
124	0.02379	0.00022886	-0.00138
124.5	0.02376	0.000230222	-0.00184
125	0.02386	0.000231584	-0.00207
125.5	0.02376	0.000232946	-0.00328
126	0.02389	0.000349809	-0.00192
126.5	0.02402	4.17054e-06	-0.00199
127	0.02407	0.000352533	-0.0023
127.5	0.02394	-0.000108605	-0.0029
128	0.02414	0.000239757	-0.00282
128.5	0.02412	-0.000221381	-0.00298
129	0.02432	0.000126481	-0.00344
129.5	0.02423	-0.000103156	-0.00306
130	0.02432	0.00059	-0.00291
130.5	0.02472	0.000362068	-0.00252
131	0.02492	0.00047893	-0.00192
131.5	0.0252	0.000133292	-0.00185
132	0.0251	0.000481654	-0.00246
132.5	0.02516	0.000136016	-0.00268
133	0.02533	0.000484379	-0.002
133.5	0.02496	0.000254741	-0.00208
134	0.02532	0.000371603	-0.00162
134.5	0.02526	0.000372965	-0.00231
135	0.02558	0.000374327	-0.00238
135.5	0.02483	0.00014419	-0.002
136	0.02565	0.000377052	-0.00261
136.5	0.02578	0.000262913	-0.00193
137	0.02583	0.000148276	-0.00208
137.5	0.02592	3.4138e-05	-0.00155
138	0.02613	0.000151	-0.00299
138.5	0.02596	0.000152363	-0.00262
139	0.02643	3.82245e-05	-0.00322
139.5	0.02641	-7.59135e-05	-0.00314
140	0.02646	0.000505	-0.00284
140.5	0.02636	0.000389311	-0.00277
141	0.02657	0.00062	-0.00292
141.5	0.02632	0.00051	-0.00262
142	0.02626	0.000625	-0.00338
142.5	0.02688	0.00039476	-0.00315
143	0.02682	0.000625	-0.00323
143.5	0.02722	0.00063	-0.00338
144	0.0272	0.00063	-0.00308
144.5	0.02744	5.3208e-05	-0.00331
145	0.02749	0.000635	-0.00339
145.5	0.02755	0.000287433	-0.00315
146	0.02768	0.00052	-0.00323
146.5	0.02765	0.000290157	-0.00339
147	0.02774	0.000525	-0.00263
147.5	0.0278	0.000408381	-0.00225
148	0.02751	0.000409744	-0.00293
148.5	0.02741	0.000411106	-0.00324
149	0.02788	0.000412467	-0.00362
149.5	0.02816	0.000645	-0.00362
150	0.02796	0.00076	-0.00362
150.5	0.02858	0.000416554	-0.00316
151	0.02837	0.000765	-0.00301
151.5	0.02865	0.000419278	-0.00294
152	0.02855	0.000765	-0.00316
152.5	0.02883	0.000422003	-0.00347
153	0.02858	0.000655	-0.00355
153.5	0.02841	0.000424727	-0.00355
154	0.02854	0.000655	-0.00325
154.5	0.02863	0.000427451	-0.00294
155	0.02872	0.00089	-0.00286
155.5	0.02881	-3.23244e-05	-0.0031
156	0.02867	0.00101	-0.0037
156.5	0.02881	0.0003174	-0.00378
157	0.02886	0.000665	-0.00347
157.5	0.02891	0.000320124	-0.00332
158	0.02882	0.000785	-0.00317
158.5	0.02895	0.000206848	-0.00332
159	0.02892	0.000785	-0.00341
159.5	0.02901	0.000209573	-0.00379
160	0.02926	0.000442435	-0.00394
160.5	0.02924	9.6797e-05	-0.00386
161	0.02944	0.000445159	-0.00379
161.5	0.0295	9.95215e-05	-0.00341
162	0.02967	0.000332384	-0.00341
162.5	0.0296	0.000217746	-0.00333
163	0.02981	0.000450608	-0.00326
163.5	0.02979	0.00022047	-0.00333
164	0.03011	0.000453332	-0.00296
164.5	0.03016	0.000339195	-0.00311
165	0.03026	0.000340557	-0.00372
165.5	0.03038	0.000341919	-0.00288
166	0.0304	0.000343281	-0.0025
166.5	0.03042	0.000113143	-0.00212
167	0.03081	0.000114505	-0.00273
167.5	0.03079	0.000231367	-0.00243
168	0.03035	0.00034873	-0.00289
168.5	0.03071	0.000350091	-0.00265
169	0.03106	4.45387e-06	-0.00289
169.5	0.03112	5.81605e-06	-0.00228
170	0.03132	-0.000108322	-0.00259
170.5	0.03119	-0.00010696	-0.00235
171	0.03117	9.9025e-06	-0.0022
171.5	0.03114	-0.000335735	-0.00327
172	0.03143	-0.000334373	-0.00342
172.5	0.03167	-0.000217011	-0.00388
173	0.03176	-0.000100149	-0.00327
173.5	0.03148	-0.000214287	-0.00327
174	0.03153	0.000249075	-0.00319
174.5	0.03181	-0.000327563	-0.00335
175	0.03179	-0.0004417	-0.00259
175.5	0.0318	-0.000324838	-0.00358
176	0.03167	2.35241e-05	-0.00305
176.5	0.03176	-0.000206114	-0.00328
177	0.03173	2.62484e-05	-0.00313
177.5	0.03175	-0.00020339	-0.00275
178	0.03166	0.000259972	-0.00282
178.5	0.03216	-8.5165e-05	-0.00282
179	0.03199	0.000147197	-0.0026
179.5	0.03273	0.000495559	-0.00313
180	0.03546	-0.000196578	-0.0029
180.5	0.03646	0.000615	-0.00313

## Sheet: A. marina sodium azide
A. marina sodium azide control
Replicate 2
	Acceptors	DCMU	DCMU+Histidine	DCMU+His+NaN3
0	-0.000242636	-0.00024539	-0.000711672	-0.00030738
0.5	-5.04552e-05	6.142e-05	-0.00104	-0.000161098
1	-0.000180274	-0.00043677	-0.000730333	-0.000336817
1.5	1.19072e-05	3.10398e-05	-0.000900664	-0.000190536
2	-0.000278912	-0.00014515	-0.000748995	-0.000205254
2.5	7.42697e-05	6.59579e-07	-0.000919326	-0.000219973
3	-0.000216549	0.000146469	-0.000767657	-0.000234692
3.5	-0.000185368	-2.97206e-05	-0.000776987	-0.00024941
4	-0.000315187	-4.49107e-05	-0.000786318	-0.000103129
4.5	0.000198995	0.000100899	-0.000634649	-0.000278848
5	-0.000252824	-7.52909e-05	-0.00096598	-0.000132566
5.5	0.000261357	7.0519e-05	-0.000653311	-0.000147285
6	-0.000190462	-0.000266671	-0.000984641	-1.00371e-06
6.5	0.000162719	0.000201139	-0.000671972	0.000145278
7	-0.000289099	-0.000297051	-0.00116	-0.000191441
7.5	-9.69181e-05	9.75862e-06	-0.000690634	-4.51597e-05
8	-0.000226737	-0.000166431	-0.00118	-0.000381878
8.5	0.000126444	-2.06216e-05	-0.000709296	-7.45971e-05
9	-0.000325374	-0.000196812	-0.00104	-8.93158e-05
9.5	-0.000133193	0.000109998	-0.000727957	5.69656e-05
10	-0.000263012	-0.000227192	-0.00106	-0.000118753
10.5	-0.000231831	7.9618e-05	-0.000585619	0.000188528
11	-0.00020065	-9.65721e-05	-0.00108	1.28096e-05
11.5	-0.000169468	-0.000111762	-0.000604281	0.000320091
12	-0.000298287	-0.000126952	-0.000935611	0.000144372
12.5	-0.000107106	1.88577e-05	-0.000622942	0.000290654
13	-0.000235925	-0.000157332	-0.000954273	0.000114935
13.5	-4.47434e-05	0.000149477	-0.000641604	0.000261216
14	-0.000173562	-2.67126e-05	-0.000972935	-7.55025e-05
14.5	1.7619e-05	-4.19027e-05	-0.000660265	0.000231779
15	-0.0002722	0.000103907	-0.000669596	-0.00010494
15.5	7.99815e-05	8.87171e-05	-0.000356927	0.000202341
16	-0.000209837	7.3527e-05	-0.000527258	-0.000134377
16.5	-1.76561e-05	5.83369e-05	-0.000536589	0.000172904
17	-0.000308475	0.000204147	-0.00022392	-0.000324815
17.5	4.47063e-05	-0.000133043	-0.00055525	0.000304467
18	-0.000246112	0.000334767	-0.000242581	-0.000193252
18.5	-0.000214931	-0.000163424	-0.000412912	0.000275029
19	-2.275e-05	0.000304386	0.000221757	-6.16892e-05
19.5	-0.000152569	-3.28037e-05	-0.000109574	0.000245592
20	-0.000121388	0.000274006	4.20955e-05	-0.000252127
20.5	-9.02063e-05	-6.31839e-05	3.27647e-05	0.000216155
21	-5.90251e-05	0.000243626	0.000184434	-0.000281564
21.5	0.000294156	6.74359e-05	1.4103e-05	0.000186717
22	3.33734e-06	0.000374246	0.000326772	-0.000311001
22.5	0.000195519	-0.000123944	-4.55863e-06	0.00015728
23	-0.0002563	0.000343866	0.000308111	-0.000340439
23.5	0.000257881	-0.000154324	-2.32203e-05	0.000127843
24	-0.000193938	0.000313485	0.000289449	-0.000208876
24.5	0.000320243	-2.37047e-05	-0.000202882	0.000259405
25	-0.000131575	0.000122105	0.000270787	-0.000238313
25.5	0.000543606	-5.40849e-05	-0.000221544	0.000229968
26	-6.92129e-05	9.17251e-05	0.000252126	-0.000106751
26.5	0.000444968	7.6535e-05	-7.92052e-05	3.95307e-05
27	-0.00016785	6.13449e-05	0.000233464	-0.000136188
27.5	0.000185331	4.61548e-05	-0.000258867	1.00933e-05
28	-0.000266488	-0.000130035	-0.000107198	-0.000165625
28.5	-7.43068e-05	0.000176775	4.44715e-05	-1.9344e-05
29	-4.31256e-05	-0.000160416	0.000196141	-0.000195063
29.5	-1.19443e-05	0.000307394	-0.00013519	0.000112219
30	1.92369e-05	-0.000190796	0.000177479	-0.0002245
30.5	5.04181e-05	0.000277014	-0.000153852	8.27813e-05
31	-7.94007e-05	-0.000221176	0.000158817	-0.000253937
31.5	0.000112781	0.000246634	-0.000172513	5.3344e-05
32	-1.70382e-05	-9.05561e-05	0.000140156	3.86253e-05
32.5	1.4143e-05	5.52538e-05	-0.000191175	0.000184907
33	-0.000115676	-0.000120936	-3.95059e-05	-0.000312812
33.5	7.65054e-05	0.000506874	-0.000209837	-5.53074e-06
34	-5.33133e-05	-0.000151316	-0.000219168	-2.02494e-05
34.5	0.000138868	0.000316493	-6.74984e-05	0.000126032
35	-0.000151951	-2.06967e-05	-0.000237829	-4.96868e-05
35.5	0.00020123	0.000286113	-8.61601e-05	-0.000225405
36	-0.000250588	-5.10769e-05	-0.000256491	8.18759e-05
36.5	0.000102593	9.4733e-05	5.61783e-05	-9.38428e-05
37	-0.000349226	-8.14571e-05	-0.000275153	5.24385e-05
37.5	0.000164955	6.43528e-05	3.75167e-05	-0.00012328
38	-0.000286864	4.91627e-05	-0.000293814	0.000184001
38.5	-0.000255682	0.000194973	0.000179855	-0.000152717
39	-6.35011e-05	0.000179783	-0.000312476	-6.43615e-06
39.5	-0.00019332	0.000164592	1.93359e-07	-0.000182155
40	0.000159861	0.000149402	-0.000170137	0.000125127
40.5	-0.000130957	-2.67877e-05	-1.84683e-05	-5.05922e-05
41	-9.97762e-05	0.000119022	-0.000349799	9.56892e-05
41.5	-6.8595e-05	0.000263832	0.00012387	-8.00295e-05
42	0.000123586	-7.2358e-05	-0.000368461	6.62518e-05
42.5	-6.23256e-06	7.34519e-05	0.000105208	-0.000109467
43	2.49487e-05	5.82618e-05	-0.000226122	3.68145e-05
43.5	-0.00010487	4.30717e-05	0.000247547	-0.000138904
44	0.000248311	0.000187882	-0.000244784	7.37712e-06
44.5	-4.25077e-05	1.26915e-05	0.000228885	-7.34155e-06
45	0.000149674	0.000157501	-0.000102446	-2.20602e-05
45.5	1.98548e-05	-1.76887e-05	4.92235e-05	-0.000519779
46	0.000212036	0.000288121	3.98927e-05	-5.14976e-05
46.5	8.22172e-05	-4.80689e-05	-0.000130438	-0.000388216
47	0.000113398	0.000257741	2.1231e-05	0.000241065
47.5	0.00014458	-0.000239449	-0.0001491	-9.56536e-05
48	0.000175761	6.63608e-05	0.000163569	0.000211628
48.5	-0.000115058	-0.000269829	0.000154239	-0.000125091
49	0.000238123	3.59806e-05	-0.000177092	2.11904e-05
49.5	-0.000213695	-0.000300209	-0.000186423	6.47172e-06
50	0.000300486	5.60043e-06	-0.000195754	0.000152753
50.5	-0.000151333	-0.00033059	-0.000205085	-0.000183966
51	0.000362848	-2.47798e-05	0.000107584	0.000123316
51.5	-8.89706e-05	-0.00036097	-0.000223746	-5.2403e-05
52	0.000264211	0.00010584	0.000249923	9.38784e-05
52.5	-2.66081e-05	-0.00039135	-0.000242408	-0.00024284
53	0.000326573	-8.55402e-05	0.000231261	-9.6559e-05
53.5	-0.000125246	-0.00026073	-0.00026107	-0.000111278
54	0.000227936	-0.00011592	0.000212599	-0.000125996
54.5	-6.28832e-05	-0.00013111	-0.000279731	-0.000140715
55	0.000290298	-0.000306301	0.000193938	0.000166566
55.5	-5.20781e-07	-0.000161491	-0.000298393	-0.000331152
56	0.00019166	-0.000497681	1.42762e-05	0.000137129
56.5	-9.91583e-05	-3.08708e-05	-0.000317055	-0.00052159
57	9.30229e-05	-0.000528061	-4.38547e-06	-5.33084e-05
57.5	-0.000358796	-6.1251e-05	-0.000335716	-0.000390027
58	0.000155385	-0.000558441	-0.000184047	-8.27457e-05
58.5	-0.000296433	-9.16312e-05	-0.000515378	-0.000580464
59	0.000217748	-0.000427821	-4.17088e-05	-0.000112183
59.5	-0.000234071	-0.000122011	-0.00037304	-0.000448902
60	0.00011911	-0.000458201	-6.03704e-05	1.93796e-05
60.5	-0.000171709	-0.000152392	-0.000391701	-0.000317339
61	0.000342473	-0.000488582	8.19679e-05	-0.000171058
61.5	5.16539e-05	-2.17718e-05	-0.000410363	-0.000507776
62	0.000404835	-0.000518962	-9.76937e-05	-3.94951e-05
62.5	0.000275016	0.000108848	-0.000429025	-0.000376214
63	0.000467198	-0.000549342	-0.000277355	-6.89325e-05
63.5	0.000498379	-8.25322e-05	-0.000447686	-0.000405651
64	0.00052956	-0.000579722	-0.000135017	-9.83698e-05
64.5	0.000560741	-0.000112912	-0.000305348	-0.000274088
65	0.000430922	-0.000450102	-0.000314679	-0.000127807
65.5	0.000623104	-0.000304293	-0.000163009	-0.000625526
66	0.000493285	-0.000319483	-0.00033334	-0.000157244
66.5	0.000846466	-0.000334673	-0.000181671	-0.000654963
67	0.000716647	-0.000349863	-0.000191002	-2.56818e-05
67.5	0.000908829	-0.000365053	-0.000200333	-0.000523401
68	0.00094001	-0.000219243	-0.000209664	-5.51192e-05
68.5	0.00113	-0.000556433	-0.000379994	-0.000552838
69	0.001	-0.000571623	-0.000228325	-8.45565e-05
69.5	0.00119	-0.000586813	-0.000398656	-0.000582275
70	0.00123	-0.000119003	-0.000246987	-0.000113994
70.5	0.00158	-0.000295194	-0.000256318	-0.000450713
71	0.00129	-0.000471384	-0.000265649	1.75688e-05
71.5	0.0018	-0.000325574	-0.000274979	-0.00048015
72	0.00135	-0.000340764	-0.00028431	-1.18686e-05
72.5	0.00186	-0.000516954	-0.000132641	-0.000509587
73	0.00141	-0.000210144	-0.000302972	-0.000202306
73.5	0.00193	-0.000386334	9.69735e-06	-0.000539025
74	0.00164	-0.000240524	-0.000482633	-0.000231743
74.5	0.00199	-0.000577714	-0.000169964	-0.000407462
75	0.0017	-0.000270904	-0.000501295	6.08194e-05
75.5	0.00221	-0.000608094	-0.000188626	-0.000436899
76	0.00176	-0.000301285	-0.000519957	-0.000129618
76.5	0.00228	-0.000638475	-0.000207288	-0.000466337
77	0.00198	-0.000170665	-0.000699618	-0.000159055
77.5	0.00234	-0.000507855	-0.000386949	-0.000495774
78	0.00189	-4.0045e-05	-0.00055728	-0.000188493
78.5	0.00256	-0.000377235	-0.000244611	-0.000525211
79	0.00211	-7.04252e-05	-0.000575942	-0.00021793
79.5	0.00262	-0.000407615	-0.000263273	-0.000554649
80	0.00233	-0.000100805	-0.000755603	-0.000247367
80.5	0.00285	-0.000598995	-0.000281934	-0.000584086
81	0.00239	-0.000131186	-0.000774265	-0.000276805
81.5	0.00291	-0.000629376	-0.000300596	-0.000613523
82	0.00262	-0.000161566	-0.000631927	-0.000306242
82.5	0.00313	-0.000498756	-0.000480257	-0.000642961
83	0.00284	-0.000191946	-0.000650588	-0.000335679
83.5	0.00319	-0.000529136	-0.000820919	-0.000672398
84	0.00306	-0.000222326	-0.00066925	-0.000365117
84.5	0.00342	-0.000398516	-0.000839581	-0.000701835
85	0.00329	-9.17063e-05	-0.000526912	-0.000233554
85.5	0.00348	-0.000106896	-0.000858242	-0.000731273
86	0.00351	-0.000122087	-0.000545573	-0.000262991
86.5	0.00338	-0.000137277	-0.000876904	-0.00076071
87	0.00325	-0.000152467	-0.000564235	-0.000292429
87.5	0.00377	-0.000167657	-0.00106	-0.000790147
88	0.00364	-0.000343847	-0.000904897	-0.000321866
88.5	0.00399	-0.000198037	-0.000914227	-0.000658585
89	0.0037	-0.000535227	-0.000762558	-0.000351303
89.5	0.00389	-0.000228417	-0.000932889	-0.000688022
90	0.00376	-0.000565607	-0.00078122	-0.000219741
90.5	0.00411	-0.000258797	-0.000951551	-0.000717459
91	0.00415	-0.000756987	-0.000799881	-0.000410178
91.5	0.00418	-0.000289178	-0.00113	-0.000746897
92	0.00437	-0.000787368	-0.000818543	-0.000439616
92.5	0.00424	-0.000319558	-0.00131	-0.000776334
93	0.00427	-0.000817748	-0.000837205	-0.000469053
93.5	0.0043	-0.000349938	-0.00133	-0.000644772
94	0.00465	-0.000848128	-0.00102	-0.00049849
94.5	0.00404	-0.000541318	-0.00135	-0.000835209
95	0.00456	-0.000717508	-0.000874528	-0.000366928
95.5	0.0041	-0.000571698	-0.00137	-0.000864646
96	0.00462	-0.000747888	-0.00105	-0.000557365
96.5	0.00433	-0.000602079	-0.00155	-0.000894084
97	0.00468	-0.000778269	-0.00123	-0.000586802
97.5	0.00439	-0.000632459	-0.00157	-0.000923521
98	0.0049	-0.000647649	-0.00125	-0.00061624
98.5	0.00445	-0.000823839	-0.00174	-0.000952958
99	0.00513	-0.000517029	-0.00127	-0.000484677
99.5	0.00451	-0.000854219	-0.00144	-0.000982396
100	0.00503	-0.000708409	-0.000967836	-0.000675114
100.5	0.00474	-0.000562599	-0.00146	-0.00101
101	0.00525	-0.000577789	-0.00115	-0.000704552
101.5	0.0048	-0.000592979	-0.00164	-0.00088027
102	0.00531	-0.00060817	-0.00117	-0.000894989
102.5	0.00502	-0.00078436	-0.00166	-0.000909708
103	0.00538	-0.00047755	-0.00135	-0.00109
103.5	0.00525	-0.00081474	-0.00184	-0.000778145
104	0.00544	-0.00034693	-0.00153	-0.00111
104.5	0.00531	-0.00084512	-0.00186	-0.00113
105	0.0055	-0.00053831	-0.00171	-0.000822301
105.5	0.00553	-0.0008755	-0.00188	-0.00116
106	0.00556	-0.00056869	-0.00188	-0.00101
106.5	0.00543	-0.00107	-0.00206	-0.00119
107	0.00579	-0.000599071	-0.00206	-0.000881176
107.5	0.0055	-0.0011	-0.00207	-0.00106
108	0.00601	-0.000629451	-0.00176	-0.000910613
108.5	0.00572	-0.00113	-0.00225	-0.000925332
109	0.00591	-0.000820831	-0.0021	-0.00094005
109.5	0.00578	-0.00116	-0.00227	-0.000954769
110	0.00613	-0.000690211	-0.00228	-0.00113
110.5	0.006	-0.00119	-0.00229	-0.000984206
111	0.0062	-0.000720591	-0.0023	-0.00116
111.5	0.00607	-0.00106	-0.00231	-0.00101
112	0.0061	-0.000750972	-0.00248	-0.00135
112.5	0.00629	-0.00125	-0.00233	-0.00104
113	0.00664	-0.000942352	-0.00266	-0.00154
113.5	0.00651	-0.00144	-0.00235	-0.00107
114	0.00622	-0.000972732	-0.00268	-0.00125
114.5	0.00658	-0.00131	-0.0022	-0.00126
115	0.00629	-0.00116	-0.0027	-0.00128
115.5	0.00664	-0.0015	-0.00238	-0.00113
116	0.00667	-0.00136	-0.00272	-0.00147
116.5	0.00654	-0.00137	-0.00256	-0.00132
117	0.00689	-0.00139	-0.00306	-0.00166
117.5	0.0066	-0.0014	-0.00274	-0.00135
118	0.00696	-0.00142	-0.00324	-0.00185
118.5	0.00683	-0.00127	-0.00276	-0.00154
119	0.00718	-0.00161	-0.00325	-0.00188
119.5	0.00705	-0.00162	-0.00294	-0.00157
120	0.00724	-0.00132	-0.00327	-0.00191
120.5	0.00711	-0.00149	-0.00296	-0.0016
121	0.00714	-0.00151	-0.00329	-0.00162
121.5	0.00717	-0.00152	-0.00314	-0.00147
122	0.0072	-0.0017	-0.00331	-0.00132
122.5	0.00724	-0.00155	-0.00332	-0.00182
123	0.00727	-0.00173	-0.00333	-0.00151
123.5	0.0073	-0.00158	-0.0035	-0.00153
124	0.00733	-0.00176	-0.00335	-0.0017
124.5	0.00752	-0.00145	-0.00368	-0.00172
125	0.00739	-0.00163	-0.00337	-0.00173
125.5	0.00758	-0.00132	-0.00386	-0.00159
126	0.00762	-0.00182	-0.00339	-0.00176
126.5	0.00732	-0.00167	-0.00404	-0.00178
127	0.00784	-0.00169	-0.00389	-0.00163
127.5	0.00755	-0.00187	-0.00406	-0.00197
128	0.00774	-0.00172	-0.0039	-0.00166
128.5	0.00761	-0.0019	-0.00424	-0.002
129	0.00796	-0.00159	-0.00408	-0.00153
129.5	0.00767	-0.00193	-0.00442	-0.00203
130	0.00803	-0.00178	-0.00394	-0.00172
130.5	0.00773	-0.00196	-0.00443	-0.00206
131	0.00777	-0.00165	-0.00412	-0.00175
131.5	0.00796	-0.00215	-0.00461	-0.00225
132	0.00783	-0.00184	-0.00414	-0.00178
132.5	0.00802	-0.00218	-0.00463	-0.00228
133	0.00789	-0.00171	-0.00432	-0.00181
133.5	0.00824	-0.00237	-0.00481	-0.00231
134	0.00795	-0.0019	-0.0045	-0.002
134.5	0.00815	-0.0024	-0.00499	-0.00233
135	0.00802	-0.00193	-0.00468	-0.00187
135.5	0.00837	-0.00243	-0.00501	-0.0022
136	0.0084	-0.00196	-0.00502	-0.0019
136.5	0.00827	-0.00246	-0.00519	-0.00239
137	0.00862	-0.00215	-0.00504	-0.00209
137.5	0.00833	-0.00249	-0.00537	-0.00258
138	0.00852	-0.00235	-0.00522	-0.00212
138.5	0.00839	-0.00236	-0.00555	-0.00277
139	0.00859	-0.00222	-0.0054	-0.00231
139.5	0.00846	-0.00255	-0.00557	-0.00264
140	0.00865	-0.00225	-0.00542	-0.00234
140.5	0.00852	-0.00258	-0.00575	-0.00267
141	0.00871	-0.00228	-0.0056	-0.00253
141.5	0.00858	-0.00261	-0.00577	-0.00286
142	0.00877	-0.00231	-0.00578	-0.00272
142.5	0.00864	-0.00264	-0.00578	-0.00289
143	0.00884	-0.00266	-0.00596	-0.00275
143.5	0.00887	-0.00267	-0.0058	-0.00292
144	0.0089	-0.00285	-0.00597	-0.00261
144.5	0.00893	-0.00254	-0.00598	-0.00295
145	0.00912	-0.00288	-0.00631	-0.0028
145.5	0.00899	-0.00257	-0.00616	-0.00314
146	0.00935	-0.00291	-0.00649	-0.00283
146.5	0.00889	-0.00244	-0.00618	-0.00317
147	0.00941	-0.0031	-0.00635	-0.00302
147.5	0.00912	-0.00263	-0.00636	-0.00304
148	0.00947	-0.00297	-0.00653	-0.00322
148.5	0.00902	-0.00266	-0.00654	-0.00323
149	0.00953	-0.00316	-0.00671	-0.00324
149.5	0.00924	-0.0027	-0.00656	-0.00326

## Sheet: Rose Bengal
	Rose Bengal	Rose Bengal+Histidine
-60	0.000809545	-0.000481738
-59.5	0.000528207	-4.54687e-05
-59	0.000824869	-0.0004752
-58.5	0.000543531	-3.89304e-05
-58	0.000840193	-0.000323661
-57.5	0.000558856	-0.000176392
-57	0.000855518	-0.000173123
-56.5	0.00043018	-2.58537e-05
-56	0.000870842	-0.000166584
-55.5	0.000445504	-1.93153e-05
-55	0.000886166	0.000128954
-54.5	0.000604828	0.000132223
-54	0.000901491	-9.50778e-06
-53.5	0.000765153	-6.23861e-06
-53	0.000627815	-2.96943e-06
-52.5	0.000924477	0.0001453
-52	0.000643139	3.56892e-06
-51.5	0.000939801	6.8381e-06
-51	0.000514463	-0.000133893
-50.5	0.000955125	0.000158376
-50	0.000529788	-0.000127354
-49.5	0.00082645	0.000164915
-49	0.000545112	-0.000264816
-48.5	0.000841774	0.000171453
-48	0.000704436	-0.000114278
-47.5	0.000712098	0.000177992
-47	0.00071976	3.62607e-05
-46.5	0.000727422	0.00032853
-46	0.000735085	4.2799e-05
-45.5	0.000598747	0.000191068
-45	0.000895409	-9.46626e-05
-44.5	0.000614071	0.000197607
-44	0.000910733	-0.000232124
-43.5	0.000484395	5.91449e-05
-43	0.000926057	-0.000225586
-42.5	0.00078872	0.000210683
-42	0.000796382	-0.000219048
-41.5	0.000804044	7.22216e-05
-41	0.000667706	-6.85092e-05
-40.5	0.000964368	-6.524e-05
-40	0.00068303	-6.19708e-05
-39.5	0.000979692	-5.87017e-05
-39	0.000698354	8.85675e-05
-38.5	0.000995017	0.000236837
-38	0.000713679	-0.000192894
-37.5	0.00101	9.8375e-05
-37	0.000729003	-0.000186356
-36.5	0.000880665	0.000104913
-36	0.000888327	-0.000179817
-35.5	0.000606989	0.000111452
-35	0.00105	-2.92791e-05
-34.5	0.000622314	-2.60099e-05
-34	0.000918976	-2.27407e-05
-33.5	0.000782638	-1.94716e-05
-33	0.0006453	0.000127798
-32.5	0.000797962	-0.000156933
-32	0.000516624	0.000134336
-31.5	0.000957286	-0.000150395
-31	0.000675949	0.000140874
-30.5	0.00112	-0.000143856
-30	0.000836273	0.000147413
-29.5	0.000843935	-0.000137318
-29	0.000995597	0.000153951
-28.5	0.000714259	1.32202e-05
-28	0.00101	-0.000127511
-27.5	0.000585584	-0.000124241
-27	0.000882246	-0.000120972
-26.5	0.000600908	-0.000117703
-26	0.00075257	2.95661e-05
-25.5	0.000760232	3.28353e-05
-25	0.000767894	0.000180104
-24.5	0.000920556	-0.000104626
-24	0.000639218	4.26428e-05
-23.5	0.00108	-0.000243088
-23	0.000943543	4.91811e-05
-22.5	0.000951205	-0.00023655
-22	0.000813867	5.57195e-05
-21.5	0.000677529	-8.50113e-05
-21	0.000829191	-8.17421e-05
-20.5	0.000692853	-0.000223473
-20	0.000989515	6.87962e-05
-19.5	0.000564178	7.20654e-05
-19	0.00085984	-0.000213665
-18.5	0.000434502	0.000222604
-18	0.000731164	-0.000207127
-17.5	0.000738826	8.51421e-05
-17	0.000746488	-5.55887e-05
-16.5	0.00089815	9.16804e-05
-16	0.000617813	-0.00019405
-15.5	0.000913475	-4.57812e-05
-15	0.000633137	-0.000187512
-14.5	0.000928799	-3.92429e-05
-14	0.000792461	-0.000180974
-13.5	0.000656123	0.000111295
-13	0.000951785	-0.000174435
-12.5	0.000526447	0.000117834
-12	0.00096711	-0.000167897
-11.5	0.000541772	-1.96278e-05
-11	0.000838434	-0.000161359
-10.5	0.000702096	0.000130911
-10	0.000853758	-0.00015482
-9.5	0.00071742	0.000137449
-9	0.000580082	-0.000292282
-8.5	0.000876745	0.000143987
-8	0.000595407	-0.000285744
-7.5	0.00104	6.52562e-06
-7	0.000610731	-0.000424205
-6.5	0.000907393	-0.000131936
-6	0.000626055	-0.000417667
-5.5	0.000922717	-0.000125398
-5	0.000641379	-0.000411129
-4.5	0.000649042	-0.000118859
-4	0.00109	-0.00025959
-3.5	0.000809366	-0.000256321
-3	0.000961028	-0.000253052
-2.5	0.00067969	-0.000249783
-2	0.000832352	-0.000246513
-1.5	0.000695014	-0.000243244
-1	0.000558677	-0.000239975
-0.5	0.000855339	-0.000236706
0	0.000574001	-8.94367e-05
0.5	0.000870663	-8.61676e-05
1	0.000589325	-0.000371898
1.5	0.000596987	-7.96292e-05
2	0.000604649	-0.00036536
2.5	0.000612311	7.19091e-05
3	0.000619974	-0.000213822
3.5	0.000483636	0.000222447
4	0.000779298	8.17167e-05
4.5	0.00049896	0.000372986
5	0.000794622	0.000232255
5.5	0.000514284	0.000379524
6	0.000665946	0.000238793
6.5	0.000529608	0.000386063
7	0.000248271	0.000245332
7.5	0.000399933	0.000392601
8	-0.000169405	0.00039587
8.5	-1.7743e-05	0.000544139
9	-0.000587081	0.000547408
9.5	-0.000435419	0.000550678
10	-0.000860757	0.000553947
10.5	-0.000853094	0.000701216
11	-0.00128	0.000415485
11.5	-0.00142	0.000851754
12	-0.0017	0.000422023
12.5	-0.00212	0.000858293
13	-0.00226	0.000573562
13.5	-0.00254	0.000864831
14	-0.00253	0.0005801
14.5	-0.0031	0.000871369
15	-0.00309	0.000586639
15.5	-0.00381	0.000877908
16	-0.0038	0.000737177
16.5	-0.00437	0.000884446
17	-0.00465	0.000599715
17.5	-0.00493	0.000890984
18	-0.00536	0.000606254
18.5	-0.00564	0.000753523
19	-0.00621	0.000612792
19.5	-0.00635	0.000904061
20	-0.00706	0.00061933
20.5	-0.0072	0.00106
21	-0.00791	0.000769869
21.5	-0.00805	0.00106
22	-0.00891	0.000776407
22.5	-0.00904	0.00107
23	-0.00976	0.000638945
23.5	-0.01004	0.000930215
24	-0.01075	0.000645484
24.5	-0.01103	0.000936753
25	-0.01175	0.000507022
25.5	-0.01232	0.000943291
26	-0.0126	0.00065856
26.5	-0.01346	0.00094983
27	-0.01359	0.000520099
27.5	-0.01445	0.000812368
28	-0.01473	0.000526637
28.5	-0.01559	0.000818906
29	-0.01602	0.000533175
29.5	-0.01673	0.000681445
30	-0.0173	0.000539714
30.5	-0.01787	0.000975983
31	-0.01844	0.000546252
31.5	-0.01901	0.000838521
32	-0.01987	0.000552791
32.5	-0.02015	0.00084506
33	-0.02115	0.000559329
33.5	-0.02129	0.000707598
34	-0.02244	0.000421867
34.5	-0.02272	0.000569136
35	-0.02372	0.000572406
35.5	-0.02429	0.000575675
36	-0.02486	0.000578944
36.5	-0.02572	0.000438213
37	-0.02615	0.000441482
37.5	-0.02729	0.000300751
38	-0.02772	0.000448021
38.5	-0.02872	0.00016229
39	-0.02929	0.000310559
39.5	-0.03015	2.48282e-05
40	-0.03086	2.80974e-05
40.5	-0.03143	0.000175367
41	-0.03244	3.46357e-05
41.5	-0.03286	3.79049e-05
42	-0.03401	4.11741e-05
42.5	-0.03429	-0.000100557
43	-0.03544	4.77124e-05
43.5	-0.03572	-0.000238018
44	-0.03687	5.42508e-05
44.5	-0.03729	-0.00023148
45	-0.03815	6.07891e-05
45.5	-0.03915	-0.000368942
46	-0.03972	-7.76725e-05
46.5	-0.04073	-0.000507403
47	-0.0413	-0.000215134
47.5	-0.04244	-0.000500865
48	-0.04287	-0.000352596
48.5	-0.04402	-0.000638327
49	-0.04473	-0.000491057
49.5	-0.04573	-0.000920788
50	-0.04645	-0.000628519
50.5	-0.04745	-0.00062525
51	-0.04788	-0.000765981
51.5	-0.04917	-0.000618712
52	-0.04959	-0.000759442
52.5	-0.0506	-0.000901173
53	-0.05145	-0.000897904
53.5	-0.05231	-0.000894635
54	-0.05317	-0.00104
54.5	-0.05403	-0.00103
55	-0.05518	-0.00103
55.5	-0.0556	-0.00117
56	-0.05689	-0.00102
56.5	-0.05732	-0.00131
57	-0.05861	-0.00116
57.5	-0.05904	-0.00145
58	-0.06033	-0.0013
58.5	-0.0609	-0.00158
59	-0.06205	-0.00129
59.5	-0.06262	-0.00158
60	-0.06376	-0.00143
60.5	-0.06448	-0.00157
61	-0.06534	-0.00142
61.5	-0.06619	-0.00171
62	-0.06705	-0.00171
62.5	-0.06791	-0.0017
63	-0.06877	-0.0017
63.5	-0.06963	-0.00184
64	-0.07049	-0.00198
64.5	-0.07163	-0.00212
65	-0.07206	-0.00212
65.5	-0.07335	-0.00226
66	-0.07378	-0.00226
66.5	-0.07507	-0.00254
67	-0.0755	-0.00225
67.5	-0.07679	-0.00268
68	-0.07721	-0.00239
68.5	-0.07836	-0.00282
69	-0.07893	-0.00253
69.5	-0.07979	-0.00296
70	-0.08065	-0.00252
70.5	-0.08179	-0.00309
71	-0.08236	-0.0028
71.5	-0.08337	-0.00323
72	-0.08408	-0.00294
72.5	-0.08494	-0.00337
73	-0.0858	-0.00308
73.5	-0.08666	-0.00351
74	-0.08752	-0.00321
74.5	-0.08837	-0.0035
75	-0.08952	-0.00335
75.5	-0.08995	-0.00349
76	-0.09109	-0.00363
76.5	-0.09166	-0.00378
77	-0.09281	-0.00377
77.5	-0.09353	-0.00377
78	-0.09438	-0.00405
78.5	-0.09524	-0.00391
79	-0.0961	-0.0039
79.5	-0.09681	-0.00433
80	-0.09782	-0.00404
80.5	-0.09853	-0.00433
81	-0.09925	-0.00432
81.5	-0.10011	-0.00447
82	-0.10096	-0.00417
82.5	-0.10182	-0.0046
83	-0.10268	-0.00446
83.5	-0.10339	-0.00474
84	-0.10396	-0.00459
84.5	-0.10511	-0.00488
85	-0.10539	-0.00488
85.5	-0.10654	-0.00502
86	-0.10697	-0.00501
86.5	-0.10811	-0.00501
87	-0.10854	-0.0053
87.5	-0.10969	-0.00515
88	-0.11011	-0.00514
88.5	-0.11126	-0.00529
89	-0.11168	-0.00528
89.5	-0.11283	-0.00557
90	-0.11326	-0.00542
90.5	-0.1144	-0.00571
91	-0.11483	-0.00541
