# Supplementary material for: Impact of energy limitations on function and resilience in long-wavelength Photosystem II
Source: eLife. 2022 Jul 19;11:e79890. doi: 10.7554/eLife.79890 (PMC9439682; doi:10.7554/eLife.79890)
Supplement: Figure 6—source data 1. [file elife-79890-fig6-data1.xlsx]

## Sheet: A. marina
A. marina
Replicate 1					Replicate 2					Replicate 3				Replicate 4				Replicate 5				Replicate 6
	Acceptors	DCMU	DCMU+Histidine			Acceptors	DCMU	DCMU+Histidine			Acceptors	DCMU+Histidine			Acceptors	DCMU+Histidine			Acceptors	DCMU+Histidine			Acceptors	DCMU	DCMU+His
0	4.34604e-05	-0.000476549	-0.000349383		0	-0.000242636	-0.00024539	-0.000711672		0	0.000149692	0.000434792		0	1.66043e-05	-0.00155		0	-0.000532084	-0.00182		0	-0.000904473	-0.000946904	-0.000232836
0.5	-0.000212796	-0.000769107	-0.000641077		0.5	-5.04552e-05	6.142e-05	-0.00104		0.5	-0.000128745	0.000100727		0.5	-0.000245456	-0.000789707		0.5	-9.1096e-05	0.000337306		0.5	-0.000574902	-0.00018786	8.1663e-05
1	-1.60516e-05	-0.000525664	-0.000216771		1	-0.000180274	-0.00043677	-0.000730333		1	0.000292819	0.000500663		1	8.04833e-05	-0.000327988		1	-0.00109	-0.000382702		1	-0.00053733	-0.000888817	-0.000334838
1.5	2.96924e-05	-0.000997221	-0.000686465		1.5	1.19072e-05	3.10398e-05	-0.000900664		1.5	-0.000160617	0.000166599		1.5	-0.000328577	-0.000603269		1.5	7.08809e-05	0.00033529		1.5	-0.000791759	0.000455227	0.000126661
2	-7.55636e-05	-0.000754778	-0.000263159		2	-0.000278912	-0.00014515	-0.000748995		2	-8.90537e-05	0.000566534		2	0.000144362	-0.00028855		2	0.000151869	-0.000384719		2	-0.000608187	-0.000684729	-0.000289841
2.5	-0.00017982	-0.00105	-0.000553853		2.5	7.42697e-05	6.59579e-07	-0.000919326		2.5	0.00015751	-0.00050153		2.5	-0.000264698	-0.000563831		2.5	-0.000127142	-0.000385727		2.5	-0.000716616	-7.16848e-05	0.000171658
3	1.59244e-05	-0.000803892	-0.000130547		3	-0.000216549	0.000146469	-0.000767657		3	-0.000120926	0.000632406		3	6.12412e-05	4.48877e-05		3	0.000672846	-0.000386735		3	-0.000241044	-0.000480641	-0.000244843
3.5	-8.83316e-05	-0.0011	-0.000600241		3.5	-0.000185368	-2.97206e-05	-0.000776987		3.5	0.000300637	-0.000251658		3.5	-0.000348819	-0.000376393		3.5	-0.000324165	-2.77438e-05		3.5	-0.000349473	-0.000451597	7.06558e-05
4	-4.25876e-05	-0.000675006	-0.000533935		4	-0.000315187	-4.49107e-05	-0.000786318		4	-0.000152799	-0.000952723		4	0.00027212	8.43254e-05		4	0.000475823	-0.000747752		4	-0.00104	-0.000276553	-0.000199845
4.5	3.15642e-06	-0.00115	-0.000467629		4.5	0.000198995	0.000100899	-0.000634649		4.5	0.000268764	0.000180213		4.5	-0.00043194	-0.000336956		4.5	-0.000162188	-0.00074876		4.5	0.000163671	-0.000831509	-0.000177347
5	4.89004e-05	-0.00090412	-0.000401323		5	-0.000252824	-7.52909e-05	-0.00096598		5	-0.000359672	-0.000886851		5	0.000335999	-0.000170237		5	0.0002778	-0.00111		5	-0.000674758	0.000512535	-0.000154848
5.5	-5.63556e-05	-0.00102	-0.000692017		5.5	0.000261357	7.0519e-05	-0.000653311		5.5	0.000236892	-0.000486915		5.5	-0.000368061	-0.000297518		5.5	-0.000360212	-0.000750777		5.5	-0.000929186	-0.000919421	-0.000278349
6	-1.06116e-05	-0.000953234	-0.000268712		6	-0.000190462	-0.000266671	-0.000984641		6	0.000133455	-0.00082098		6	0.000252878	-0.000277799		6	0.000439777	-0.000751786		6	-1.56149e-05	0.000570623	3.71498e-05
6.5	-0.000115868	-0.00142	-0.000559406		6.5	0.000162719	0.000201139	-0.000671972		6.5	-0.000144981	-5.40439e-05		6.5	-0.000304182	-0.00025808		6.5	-0.000198235	-0.000752794		6.5	-0.001	-0.000423334	-0.000525351
7	-7.01236e-05	-0.00118	-0.0003141		7	-0.000289099	-0.000297051	-0.00116		7	0.000276582	-0.000388108		7	0.000316757	-0.000238362		7	-0.000117246	-3.48022e-05		7	-0.000524472	-0.00010229	-0.000210853
7.5	-2.43796e-05	-0.00147	-0.000605794		7.5	-9.69181e-05	9.75862e-06	-0.000690634		7.5	-0.000351854	0.000194828		7.5	-0.000387303	-0.000218643		7.5	-3.62577e-05	-3.58106e-05		7.5	-0.0004869	-7.32457e-05	-0.000188354
8	-0.000129636	-0.00105	-0.000181488		8	-0.000226737	-0.000166431	-0.00118		8	0.00024471	-0.000139237		8	0.000233636	-0.000346924		8	4.47307e-05	0.000682181		8	-0.000595329	-0.000628202	-0.000457855
8.5	-8.38916e-05	-0.00152	-0.000473182		8.5	0.000126444	-2.06216e-05	-0.000709296		8.5	-0.000383727	0.000260699		8.5	-0.000323425	-3.22051e-05		8.5	0.000125719	-3.78273e-05		8.5	-0.000703757	0.000276842	-0.000143356
9	-0.000189148	-0.000924576	0.000129124		9	-0.000325374	-0.000196812	-0.00104		9	0.000212837	0.000476635		9	0.000297515	-0.000307486		9	0.000206708	0.000680164		9	-0.000374186	-0.000862114	-0.000412857
9.5	-0.000143404	-0.0014	-0.00034057		9.5	-0.000133193	0.000109998	-0.000727957		9.5	-0.000240599	-4.04295e-05		9.5	0.000182454	7.23263e-06		9.5	-7.13039e-05	-3.9844e-05		9.5	-0.000628614	0.00048093	4.76415e-05
10	-9.76596e-05	-0.000795691	8.37362e-05		10	-0.000263012	-0.000227192	-0.00106		10	0.000180964	-0.000557494		10	-0.000227606	-0.000268049		10	0.000368685	-4.08523e-05		10	-0.000591043	-0.000804026	-0.00051386
10.5	-5.19156e-05	-0.00109	-0.000207958		10.5	-0.000231831	7.9618e-05	-0.000585619		10.5	-0.000272472	0.000209442		10.5	9.83334e-05	0.00019367		10.5	9.0673e-05	-0.00148		10.5	-0.000115471	-4.49822e-05	-5.33609e-05
11	-6.17157e-06	-0.000666805	3.73481e-05		11	-0.00020065	-9.65721e-05	-0.00108		11	-2.59086e-05	-0.000308622		11	-0.000163727	-0.000228611		11	0.000171661	-0.00148		11	-0.0009549	-0.000307938	-0.000322862
11.5	-0.000110428	-0.000959362	-7.5346e-05		11.5	-0.000169468	-0.000111762	-0.000604281		11.5	-0.000129345	-0.000458687		11.5	0.000162212	0.000233108		11.5	-0.00010735	-0.000762877		11.5	0.000105672	-0.000278894	-8.3633e-06
12	-0.000215684	-0.000715919	0.00016996		12	-0.000298287	-0.000126952	-0.000935611		12	-0.000232781	0.000124249		12	-0.000246848	-0.000336173		12	0.000333638	0.000314114		12	-0.000294756	4.21495e-05	-0.000131864
12.5	-1.89396e-05	-0.000830476	-0.000120734		12.5	-0.000107106	1.88577e-05	-0.000622942		12.5	0.000363782	-0.000576815		12.5	7.90913e-05	0.000272546		12.5	0.00113	-4.58941e-05		12.5	-0.00113	-0.000658807	-0.000255366
13	2.68044e-05	-0.000587033	0.000123572		13	-0.000235925	-0.000157332	-0.000954273		13	-0.000264654	-0.000176879		13	-0.000330969	-0.000149735		13	0.000135615	0.000672098		13	7.23866e-05	0.000246237	-8.68669e-05
13.5	-7.84516e-05	-0.00070159	-0.000167122		13.5	-4.47434e-05	0.000149477	-0.000641604		13.5	0.000156909	-0.000143944		13.5	0.00028997	1.79834e-05		13.5	0.000576604	-4.79108e-05		13.5	-0.00121	-0.000746719	-0.000356368
14	-3.27076e-05	-0.000637147	-0.000100816		14	-0.000173562	-2.67126e-05	-0.000972935		14	-0.000121527	-0.000478008		14	-0.00026709	-0.000110298		14	-6.14079e-05	0.000310081		14	-0.00029047	0.000304325	-4.18693e-05
14.5	-0.000288964	-0.000750704	-3.45102e-05		14.5	1.7619e-05	-4.19027e-05	-0.000660265		14.5	-4.99633e-05	-0.00136		14.5	0.000206849	5.7421e-05		14.5	0.000378581	-0.000409927		14.5	-0.000837899	-0.000104631	-0.00045737
15	-9.22196e-05	-0.000686261	0.000210796		15	-0.0002722	0.000103907	-0.000669596		15	-0.0003284	-0.000962136		15	-0.000350211	7.71399e-05		15	0.000100569	-0.000769936		15	-0.000800327	-0.000367587	3.12834e-06
15.5	-0.000197476	-0.000800818	-8.08983e-05		15.5	7.99815e-05	8.87171e-05	-0.000356927		15.5	-8.18361e-05	-0.00111		15.5	-2.32718e-05	-0.000345141		15.5	0.000900557	-0.000770944		15.5	0.000114244	-4.65431e-05	-0.000412373
16	-7.31574e-07	-0.000379375	0.000343408		16	-0.000209837	7.3527e-05	-0.000527258		16	0.000339728	-0.000896265		16	-0.000433332	0.000116578		16	0.000262546	-0.00149		16	-0.00102	-0.000747499	-9.7874e-05
16.5	-0.000255988	-0.000671932	-0.000126286		16.5	-1.76561e-05	5.83369e-05	-0.000536589		16.5	-0.000113709	-0.000680329		16.5	-0.000107393	-1.17036e-05		16.5	0.000702534	-0.000772961		16.5	-0.000395613	0.000157545	-7.53752e-05
17	-0.000210244	-0.000250489	0.00029702		17	-0.000308475	0.000204147	-0.00022392		17	0.000132855	-0.000830394		17	-0.000369453	0.000156015		17	6.45228e-05	-0.000773969		17	-0.000650041	-0.000835411	-0.000344876
17.5	-0.0001645	-0.000543046	-0.000172674		17.5	4.47063e-05	-0.000133043	-0.00055525		17.5	-0.000320582	-0.000614458		17.5	-0.000190514	-0.000119266		17.5	0.000864511	0.000303022		17.5	-0.00061247	0.000361633	0.000115622
18	-0.000118756	-0.000299603	0.000429632		18	-0.000246112	0.000334767	-0.000242581		18	-0.000424018	-0.000948522		18	-0.000452574	0.000195453		18	0.0002265	0.000302014		18	-0.000135898	-0.000631324	-0.000299879
18.5	-7.30116e-05	-0.00041416	-0.000219063		18.5	-0.000214931	-0.000163424	-0.000412912		18.5	-0.000352454	-0.000364586		18.5	-0.000273635	-7.98282e-05		18.5	0.00103	0.000301006		18.5	-0.000683326	-0.00031028	1.462e-05
19	-0.000329268	-0.000170717	0.000383243		19	-2.275e-05	0.000304386	0.000221757		19	0.000244109	-0.000882651		19	5.23046e-05	0.000381891		19	-0.000330523	0.000299997		19	-0.000353755	-0.000135236	-0.000108881
19.5	1.84764e-05	-0.000106275	-0.000264451		19.5	-0.000152569	-3.28037e-05	-0.000109574		19.5	-0.000209327	0.000251285		19.5	-0.000356756	-0.000187391		19.5	0.000829465	0.000298989		19.5	-0.000754183	-0.000398192	5.96176e-05
20	-8.67796e-05	-0.000220832	0.000158855		20	-0.000121388	0.000274006	4.20955e-05		20	-0.000137764	-0.000449779		20	0.000264184	0.000421328		20	0.000191454	-6.10193e-05		20	-0.000862612	-7.71479e-05	-6.38836e-05
20.5	-4.10356e-05	2.26114e-05	-0.000131839		20.5	-9.02063e-05	-6.31839e-05	3.27647e-05		20.5	-0.0004162	-0.000416843		20.5	-0.000292877	-0.000147953		20.5	0.000631442	-0.000781028		20.5	-0.00024104	-0.000632104	-4.13848e-05
21	-0.000146292	-9.19457e-05	0.000291467		21	-5.90251e-05	0.000243626	0.000184434		21	-0.000519636	-0.00112		21	0.000180063	0.000460766		21	-6.5696e-06	-0.00114		21	-0.000787469	-0.00016506	0.000127114
21.5	-0.000100548	0.000151497	-0.000178227		21.5	0.000294156	6.74359e-05	1.4103e-05		21.5	0.000251927	-0.000533972		21.5	-0.000375998	-0.000108515		21.5	0.00115	-6.40444e-05		21.5	-0.000749897	-0.000866016	-0.000288387
22	-5.48036e-05	3.69402e-05	0.000245079		22	3.33734e-06	0.000374246	0.000326772		22	-0.000201509	-0.000868036		22	0.000243941	0.000353204		22	-0.000203593	0.000653947		22	-0.000566326	0.000623028	0.000172112
22.5	-9.05957e-06	0.000280383	-4.56149e-05		22.5	0.000195519	-0.000123944	-4.55863e-06		22.5	-0.000304946	-0.000468101		22.5	-0.000312119	-6.90775e-05		22.5	-0.000482604	0.000292939		22.5	-0.000820754	-0.000807928	-0.00024339
23	-0.000114316	-1.31739e-05	0.000199691		23	-0.0002563	0.000343866	0.000308111		23	-5.83819e-05	-0.000435165		23	0.00016082	9.76413e-05		23	-0.000401616	0.000291931		23	-0.000199183	-4.88844e-05	-7.48908e-05
23.5	-6.85716e-05	0.000409269	-9.10029e-05		23.5	0.000257881	-0.000154324	-2.32203e-05		23.5	-0.000161818	-0.000769229		23.5	-0.00010124	0.00041236		23.5	-0.000320627	0.000650922		23.5	-0.000599611	0.00012616	-0.000344392
24	-0.000173828	-6.2288e-05	0.000153303		24	-0.000193938	0.000313485	0.000289449		24	0.000259745	-2.29331e-06		24	7.76994e-05	0.000137079		24	0.000120361	-6.90861e-05		24	-0.00085404	-0.000574797	-0.000175893
24.5	-0.000128084	0.000538155	-0.000137391		24.5	0.000320243	-2.37047e-05	-0.000202882		24.5	-0.000368691	-0.000520358		24.5	-0.000332361	0.000303798		24.5	-0.00015865	-0.000430094		24.5	-8.64681e-05	3.82473e-05	-0.000299394
25	-8.23396e-05	6.65979e-05	0.000107915		25	-0.000131575	0.000122105	0.000270787		25	-0.000122127	6.35782e-05		25	0.000141578	2.95167e-05		25	-7.7662e-05	-0.000790103		25	-0.000924897	-0.000808709	-0.000276896
25.5	-3.65956e-05	0.000309041	-0.000183779		25.5	0.000543606	-5.40849e-05	-0.000221544		25.5	-0.000575564	-8.74861e-05		25.5	-0.000268482	0.000491236		25.5	-0.000715674	-0.00151		25.5	0.000280675	0.000242335	-0.000108397
26	-0.000140852	0.000195484	0.000240527		26	-6.92129e-05	9.17251e-05	0.000252126		26	2.09998e-05	0.00012945		26	0.000205457	6.89544e-05		26	8.43149e-05	0.00064588		26	-0.000557753	-0.000604621	-0.000231898
26.5	-9.51076e-05	0.000616927	-5.11672e-05		26.5	0.000444968	7.6535e-05	-7.92052e-05		26.5	-0.000432437	-0.000204615		26.5	-0.000204603	0.000530673		26.5	-0.000194697	-7.41279e-05		26.5	-0.000520182	-0.000575577	0.000374601
27	-0.000200364	0.00050237	0.000194139		27	-0.00016785	6.13449e-05	0.000233464		27	-0.000535873	1.13211e-05		27	0.000269336	-3.86079e-05		27	0.000246292	0.000643864		27	-0.00019061	3.74669e-05	-4.09003e-05
27.5	0.00014638	0.000745813	-9.65553e-05		27.5	0.000185331	4.61548e-05	-0.000258867		27.5	-0.000114309	-0.000138743		27.5	-0.000287724	0.000422111		27.5	-0.00075172	0.000282855		27.5	-0.000883039	-0.000809489	0.000127598
28	4.21244e-05	0.000274256	0.000326751		28	-0.000266488	-0.000130035	-0.000107198		28	-0.000567746	-0.000289807		28	0.000186215	-0.00014717		28	0.000408269	-7.71529e-05		28	0.000176533	-5.04453e-05	0.000150097
28.5	-6.31316e-05	0.000874699	-0.000142943		28.5	-7.43068e-05	0.000176775	4.44715e-05		28.5	2.88178e-05	0.000110128		28.5	-0.000370845	0.000167549		28.5	-0.000948743	0.000640839		28.5	-0.000953896	-0.000751401	-0.000119404
29	-0.000168388	0.000403142	0.000459363		29	-4.31256e-05	-0.000160416	0.000196141		29	-7.46185e-05	-0.000223936		29	-0.000191906	-0.000254733		29	0.000210246	-0.00043917		29	-0.00106	0.000445643	4.90949e-05
29.5	2.83564e-05	0.000824584	-1.03314e-05		29.5	-1.19443e-05	0.000307394	-0.00013519		29.5	0.000171945	0.000543		29.5	0.000282034	0.000206986		29.5	-0.000786766	-8.0178e-05		29.5	-0.000440753	-0.000547314	-0.000220406
30	-0.0002279	0.000353027	0.000412975		30	1.92369e-05	-0.000190796	0.000177479		30	6.85087e-05	0.00113		30	-0.000128027	-0.000215295		30	1.32225e-05	-0.000441186		30	-0.00113	6.57304e-05	-5.19075e-05
30.5	0.000119844	0.00095347	-5.67195e-05		30.5	5.04181e-05	0.000277014	-0.000153852		30.5	-0.000559928	0.000425871		30.5	0.000198913	9.9424e-05		30.5	-0.000624789	-0.000801195		30.5	0.00036439	-5.12257e-05	-0.000321409
31	-0.000136412	0.000303913	0.000367586		31	-7.94007e-05	-0.000221176	0.000158817		31	3.66359e-05	-0.000642193		31	-0.000358148	-0.000322857		31	-0.000184801	0.000275797		31	-0.000912038	-0.000314182	-0.00015291
31.5	-9.06676e-05	0.000904356	-0.000102108		31.5	0.000112781	0.000246634	-0.000172513		31.5	-0.0004168	-0.000426257		31.5	0.000262792	-9.13835e-06		31.5	-0.00118	0.000634789		31.5	-0.000436467	6.86212e-06	-0.000422411
32	-0.000194924	0.000432799	0.000321198		32	-1.70382e-05	-9.05561e-05	0.000140156		32	-0.000345237	-0.000759322		32	-0.000294269	-0.00028342		32	0.000337176	-8.52197e-05		32	-0.000398895	-0.000548094	3.80877e-05
32.5	8.20429e-07	0.000675242	-0.000148496		32.5	1.4143e-05	5.52538e-05	-0.000191175		32.5	7.63267e-05	-0.000543386		32.5	0.000326671	-0.000116701		32.5	0.000777165	0.000272772		32.5	-0.000507324	6.49499e-05	-0.000231413
33	-0.000103436	0.000203685	9.68103e-05		33	-0.000115676	-0.000120936	-3.95059e-05		33	-0.00055211	3.95499e-05		33	-0.00023039	5.00182e-05		33	0.000139153	-0.000806236		33	0.000260248	-0.000782006	-6.29146e-05
33.5	-5.76916e-05	0.000447128	0.000341116		33.5	7.65054e-05	0.000506874	-0.000209837		33.5	0.000219454	-0.000477514		33.5	0.00024255	-7.7263e-05		33.5	0.000580142	-0.000448245		33.5	-0.00087018	0.000269038	-0.000186416
34	-0.000162948	0.000154571	5.04222e-05		34	-5.33133e-05	-0.000151316	-0.000219168		34	0.000116018	0.000105421		34	-0.000461511	0.000237456		34	-5.78699e-05	-0.000808253		34	-0.000540609	-0.000723918	-0.000163917
34.5	3.37964e-05	0.000219014	0.000295728		34.5	0.000138868	0.000316493	-6.74984e-05		34.5	0.000187581	-0.000411643		34.5	0.000159429	-0.000184825		34.5	2.31185e-05	-0.00117		34.5	-0.000649037	-0.000110874	4.58177e-06
35	-0.00022246	-7.35431e-05	0.000183034		35	-0.000151951	-2.06967e-05	-0.000237829		35	-0.000440855	0.000171293		35	-0.000397632	0.000276894		35	-0.000255893	-0.00045127		35	-0.000611466	-0.00051983	-0.000410919
35.5	-2.57156e-05	0.0003479	0.00042834		35.5	0.00020123	0.000286113	-8.61601e-05		35.5	-0.000194292	-0.000162771		35.5	0.000223307	-0.000145388		35.5	0.000544095	-0.000452278		35.5	-0.000281894	-0.000344787	4.95794e-05
36	-0.000130972	5.53428e-05	0.000136646		36	-0.000250588	-5.10769e-05	-0.000256491		36	-0.000122728	0.000237164		36	-0.000480753	0.000168331		36	-9.39161e-05	0.000625713		36	-0.000682323	-0.000315743	-0.000219922
36.5	6.57724e-05	0.000297786	0.000381952		36.5	0.000102593	9.4733e-05	5.61783e-05		36.5	-5.11643e-05	-9.69e-05		36.5	0.000287186	-0.00025295		36.5	0.000706072	0.000624705		36.5	-0.000936751	-0.000140699	-0.000197423
37	0.000111516	5.22868e-06	0.000269258		37	-0.000349226	-8.14571e-05	-0.000275153		37	0.000195399	0.000303036		37	-0.000416874	0.000207769		37	6.80608e-05	-9.53032e-05		37	-0.00046118	3.43452e-05	-2.89242e-05
37.5	6.26043e-06	0.000248672	0.000514564		37.5	0.000164955	6.43528e-05	3.75167e-05		37.5	-0.000433037	0.00107		37.5	0.000204065	-0.000213512		37.5	0.000868049	-9.63116e-05		37.5	-0.00115	-8.26109e-05	-0.000298425
38	5.20044e-05	-4.48854e-05	0.00040187		38	-0.000286864	4.91627e-05	-0.000293814		38	0.000163526	0.000552907		38	-0.000499995	0.000247207		38	-0.000488962	-0.00081632		38	-0.000240037	-5.3567e-05	1.60734e-05
38.5	-5.32516e-05	0.000377558	0.000468176		38.5	-0.000255682	0.000194973	0.000179855		38.5	-0.00046491	-0.000148157		38.5	-0.000321056	-0.000174075		38.5	0.000671026	-0.000817328		38.5	-0.00108	-0.000316523	-0.000399428
39	-7.50757e-06	8.40005e-05	-5.18186e-07		39	-6.35011e-05	0.000179783	-0.000312476		39	-4.33463e-05	-0.000482221		39	4.88385e-06	0.000286644		39	3.30146e-05	-0.000818337		39	-0.000894894	-0.000141479	6.1071e-05
39.5	3.82364e-05	0.000148443	0.000422788		39.5	-0.00019332	0.000164592	1.93359e-07		39.5	-0.000321783	-0.000265286		39.5	-0.000257177	-0.000281637		39.5	0.000473003	-0.000460345		39.5	-0.000419322	-0.000258435	-0.00035443
40	-6.70196e-05	3.48864e-05	0.000132094		40	0.000159861	0.000149402	-0.000170137		40	-0.000425219	-0.00059935		40	0.000216763	0.000179082		40	-0.000165009	0.000257647		40	-0.00111	-8.33914e-05	0.000106069
40.5	0.000129724	9.93293e-05	0.0003764		40.5	-0.000130957	-2.67877e-05	-1.84683e-05		40.5	-0.000178655	-0.000199414		40.5	-0.000193298	-0.000242199		40.5	0.00027598	0.000616638		40.5	-5.21789e-05	-0.000346347	-0.000309433
41	-0.000125532	-0.000194228	8.57057e-05		41	-9.97762e-05	0.000119022	-0.000349799		41	-0.000632092	-0.000717478		41	0.000280642	0.00021852		41	-3.03162e-06	0.00061563		41	-0.000890607	0.000120696	5.06625e-06
41.5	-7.97876e-05	4.92152e-05	0.000152012		41.5	-6.8595e-05	0.000263832	0.00012387		41.5	-0.000385528	-0.000133543		41.5	-0.000129419	-0.000350762		41.5	7.79568e-05	-0.000104378		41.5	-0.000707036	-0.00043426	-0.000410435
42	-0.000185044	-6.53418e-05	0.000218318		42	0.000123586	-7.2358e-05	-0.000368461		42	-0.000313965	-0.000651607		42	0.000344521	0.000257957		42	0.000518945	-0.000105387		42	-0.000377464	3.27843e-05	-9.59361e-05
42.5	1.17004e-05	-8.98885e-07	0.000284624		42.5	-6.23256e-06	7.34519e-05	0.000105208		42.5	-0.000767401	-0.000618671		42.5	-0.00021254	0.000130676		42.5	-0.000479066	-0.000106395		42.5	-0.00122	-0.000230172	-0.000219437
43	-9.35556e-05	-0.000114456	-0.000185071		43	2.49487e-05	5.82618e-05	-0.000226122		43	4.16263e-06	-0.000585736		43	0.0002604	-0.000143605		43	0.000680922	-0.00155		43	-1.03213e-05	-5.51279e-05	-0.000196939
43.5	-4.78116e-05	0.000127987	0.000417235		43.5	-0.00010487	4.30717e-05	0.000247547		43.5	-9.92738e-05	0.0001812		43.5	-0.000148661	0.000170114		43.5	-0.00211	-0.000108412		43.5	-0.00129	-0.000318084	-0.00017444
44	-2.06757e-06	0.00037143	-5.24586e-05		44	0.000248311	0.000187882	-0.000244784		44	0.00049729	-0.000152864		44	0.000324279	-0.000104167		44	0.000482899	-0.00010942		44	-0.000665178	-0.00014304	-0.000443941
44.5	4.36764e-05	7.88729e-05	0.000370847		44.5	-4.25077e-05	1.26915e-05	0.000228885		44.5	-0.000306147	-0.00104		44.5	-0.000231782	0.000209552		44.5	-0.000514112	0.000248572		44.5	-0.000773607	3.20039e-05	-0.000129442
45	-6.15796e-05	-3.56841e-05	-9.88467e-05		45	0.000149674	0.000157501	-0.000102446		45	-5.95829e-05	-0.000636993		45	0.000388158	-0.00035973		45	0.000644876	0.000607563		45	-0.00103	-0.000522952	-0.000544943
45.5	-1.58356e-05	2.87588e-05	0.000146459		45.5	1.98548e-05	-1.76887e-05	4.92235e-05		45.5	-0.000163019	-0.000788057		45.5	-0.000167903	0.000248989		45.5	-0.000712136	0.000606555		45.5	-0.000260464	0.000528092	6.15555e-05
46	-0.000121092	-8.47982e-05	-0.000144235		46	0.000212036	0.000288121	3.98927e-05		46	-0.000266456	-0.000388121		46	0.000305037	-0.000320292		46	0.000447853	0.000245546		46	-0.00124	-0.000464864	-0.000207946
46.5	-7.53476e-05	-2.03553e-05	0.000279071		46.5	8.22172e-05	-4.80689e-05	-0.000130438		46.5	0.000155108	-0.000722185		46.5	-0.000104024	0.000141427		46.5	-0.000550159	-0.00155		46.5	-0.000185321	0.00044018	-0.000477447
47	-2.96036e-05	-0.000313912	-0.000190623		47	0.000113398	0.000257741	2.1231e-05		47	-0.000123328	-0.00013825		47	7.49155e-05	-0.000427854		47	0.00060983	-0.00011547		47	-0.00102	-0.000114777	-0.000162948
47.5	1.61404e-05	-0.000249469	0.000232683		47.5	0.00014458	-0.000239449	-0.0001491		47.5	-5.17648e-05	-0.000656314		47.5	-4.0145e-05	0.000180865		47.5	-0.000388182	-0.000835479		47.5	-0.000840177	6.02673e-05	-0.000432449
48	6.18844e-05	-0.000363026	-5.80109e-05		48	0.000175761	6.63608e-05	0.000163569		48	-0.000155201	-0.000256378		48	0.000138795	-0.000241417		48	0.000411807	0.000241513		48	-0.000218606	-5.66888e-05	2.80495e-05
48.5	-4.23716e-05	-0.000477584	0.000365295		48.5	-0.000115058	-0.000269829	0.000154239		48.5	9.13624e-05	-0.000590442		48.5	2.3734e-05	0.000220302		48.5	-0.000226205	-0.000478495		48.5	0.000256966	-0.000465645	-0.000241452
49	3.37243e-06	-0.000234141	-0.000103399		49	0.000238123	3.59806e-05	-0.000177092		49	-1.2074e-05	-6.50672e-06		49	-0.000239327	-0.000348979		49	0.000214784	0.000599496		49	0.000878537	0.000731399	7.30471e-05
49.5	-0.000101884	-0.000527698	0.000319907		49.5	-0.000213695	-0.000300209	-0.000186423		49.5	-0.00029051	-0.000524571		49.5	0.000234613	0.00011274		49.5	-6.4228e-05	0.000238488		49.5	0.000186109	-0.000553557	-0.000342454
50	-5.61396e-05	-0.000284255	2.92129e-05		50	0.000300486	5.60043e-06	-0.000195754		50	0.000306053	-0.000124635		50	-0.000175448	-0.000309541		50	0.00073576	-0.00012152		50	0.00036968	0.000497487	-2.79552e-05
50.5	0.000140604	-0.000576812	9.55189e-05		50.5	-0.000151333	-0.00033059	-0.000205085		50.5	-0.000322383	-0.0004587		50.5	0.000151492	4.17762e-06		50.5	9.77489e-05	-0.000482529		50.5	0.000407252	-5.74692e-05	-0.000151456
51	-0.000115652	-0.000155369	-1.71752e-05		51	0.000362848	-2.47798e-05	0.000107584		51	9.91804e-05	-0.000241764		51	-0.000258569	-0.000270104		51	0.000178737	-0.000123537		51	0.000444823	0.000409575	-0.000274958
51.5	-6.99076e-05	-0.000447926	4.91308e-05		51.5	-8.89706e-05	-0.00036097	-0.000223746		51.5	0.000520744	-0.000208828		51.5	0.000215371	4.36153e-05		51.5	-9.92742e-05	-0.0012		51.5	0.000774395	6.18639e-07	-0.000106459
52	-2.41636e-05	-2.64829e-05	-6.35632e-05		52	0.000264211	0.00010584	0.000249923		52	-0.000282692	-0.000175892		52	-0.00019469	0.000211334		52	-0.000378286	-0.000125554		52	0.000373966	-0.000262337	-0.00037596
52.5	2.15804e-05	-0.00031904	0.000181743		52.5	-2.66081e-05	-0.00039135	-0.000242408		52.5	0.000313871	4.00434e-05		52.5	0.00027925	-0.000357947		52.5	6.27027e-05	-0.000126562		52.5	-2.64621e-05	0.000934706	-6.14612e-05
53	-8.36756e-05	0.000102403	-0.000287951		53	0.000326573	-8.55402e-05	0.000231261		53	-0.000314565	-0.000110021		53	-0.000130811	0.000102772		53	-0.000575309	0.00059143		53	0.000595109	-0.00049625	-0.000476962
53.5	0.000113068	-0.000369154	0.000314355		53.5	-0.000125246	-0.00026073	-0.00026107		53.5	0.000281999	0.00121		53.5	0.000343129	-0.000318509		53.5	-0.00013532	0.000230421		53.5	0.000194681	0.000116794	-0.000162464
54	7.81243e-06	0.000231289	-0.000155339		54	0.000227936	-0.00011592	0.000212599		54	-0.000171438	-0.000228149		54	-6.69317e-05	-4.79049e-06		54	-0.000413332	0.000229413		54	0.000670253	-1.61796e-07	-0.000431965
54.5	5.35564e-05	-6.12681e-05	0.000267967		54.5	-6.28832e-05	-0.00013111	-0.000279731		54.5	-9.98743e-05	-0.000378214		54.5	0.000407008	-0.000427072		54.5	2.66565e-05	-0.000130595		54.5	0.000123824	-0.000263118	-0.000117466
55	9.93004e-05	3.17482e-06	-0.000201727		55	0.000290298	-0.000306301	0.000193938		55	-2.83106e-05	0.000204722		55	-3.05275e-06	-0.000112353		55	-0.000251355	-0.000850604		55	-0.000130604	0.000349926	-0.000386967
55.5	0.000145044	6.76178e-05	0.000222578		55.5	-5.20781e-07	-0.000161491	-0.000298393		55.5	-0.000131747	-0.000496342		55.5	0.000322887	-0.000387634		55.5	-0.000170367	-0.000492612		55.5	0.000490967	-0.00049703	-0.000364468
56	3.97884e-05	-4.69393e-05	-0.000247116		56	0.00019166	-0.000497681	1.42762e-05		56	0.000289817	-0.00101		56	-8.61738e-05	-0.000219915		56	-8.93781e-05	-0.000493621		56	-0.000201461	0.000846014	-4.99696e-05
56.5	-6.44676e-05	0.000196504	0.00035519		56.5	-9.91583e-05	-3.08708e-05	-0.000317055		56.5	-0.00016362	-0.000430471		56.5	0.000239766	-0.000348196		56.5	-8.38969e-06	0.000584371		56.5	0.00085811	-0.000584942	-0.000465471
57	0.000131276	8.19466e-05	-0.000293504		57	9.30229e-05	-0.000528061	-4.38547e-06		57	0.000257944	-0.000580535		57	-2.22948e-05	-0.000180477		57	-0.000287401	0.000223363		57	-0.000126318	2.81017e-05	-4.97196e-06
57.5	2.70204e-05	0.00014639	0.000308802		57.5	-0.000358796	-6.1251e-05	-0.000335716		57.5	-0.000195493	-0.000180599		57.5	0.000156645	-0.000308759		57.5	0.000153587	0.000582354		57.5	5.72533e-05	5.71456e-05	-0.000128473
58	0.000222764	3.18325e-05	-0.000160892		58	0.000155385	-0.000558441	-0.000184047		58	0.000401071	-0.000698664		58	0.000335584	-0.00043604		58	-0.000125424	-0.000137654		58	0.000386825	-5.98105e-05	4.00257e-05
58.5	-3.24916e-05	-8.17245e-05	0.000262414		58.5	-0.000296433	-9.16312e-05	-0.000515378		58.5	0.000122635	-0.00158		58.5	-0.000221476	-0.000269321		58.5	-4.44359e-05	-0.000498662		58.5	-0.000305604	0.000261233	-8.34755e-05
59	0.000164252	0.000160718	-2.82798e-05		59	0.000217748	-0.000427821	-4.17088e-05		59	0.000369198	-0.000448792		59	0.000252463	-0.000396602		59	-0.000322447	-0.00122		59	0.00105	-0.000439723	-6.09767e-05
59.5	0.000209996	-0.000131839	0.000395026		59.5	-0.000234071	-0.000122011	-0.00037304		59.5	0.000440762	-0.0017		59.5	-0.000304597	-8.18832e-05		59.5	0.000117541	-0.000140679		59.5	0.000207539	0.000465321	-3.84779e-05
60	0.00025574	0.000111604	-7.46679e-05		60	0.00011911	-0.000458201	-6.03704e-05		60	0.000162325	-0.0013		60	0.000316342	-0.000357164		60	-0.000160471	-0.000501687		60	0.000245111	-0.000381635	-0.000161979
60.5	-5.15567e-07	-0.000180953	0.000349638		60.5	-0.000171709	-0.000152392	-0.000391701		60.5	0.000758889	-0.00108		60.5	-0.000387718	-4.24455e-05		60.5	0.000279518	0.000576304		60.5	0.000428682	0.000815409	6.51968e-06
61	0.000347228	6.14902e-05	5.7944e-05		61	0.000342473	-0.000488582	8.19679e-05		61	0.000130453	-0.00142		61	0.000233221	-0.000464727		61	-0.000358494	-0.000143704		61	-0.000117746	0.000114453	-0.000116982
61.5	0.000241972	-0.000231067	0.00030325		61.5	5.16539e-05	-2.17718e-05	-0.000410363		61.5	0.000377016	-0.0012		61.5	-0.000323839	-3.00787e-06		61.5	8.24948e-05	0.000574288		61.5	0.00109	0.000435497	0.000197517
62	0.000588716	0.000190376	1.2556e-05		62	0.000404835	-0.000518962	-9.76937e-05		62	0.00062358	-0.00117		62	0.0002971	1.6711e-05		62	-0.00163	0.000213279		62	-0.000188603	0.000464541	-0.000217984
62.5	0.00048446	-0.000281181	0.000256862		62.5	0.000275016	0.000108848	-0.000429025		62.5	0.000520144	-0.0015		62.5	-0.000112961	0.00018343		62.5	-0.000115528	-0.000865729		62.5	0.000286969	-0.000382415	9.65149e-05
63	0.000530204	0.000141262	-3.38321e-05		63	0.000467198	-0.000549342	-0.000277355		63	0.000591707	-0.00184		63	0.000212979	5.61487e-05		63	-0.00039354	-0.000507737		63	0.00017854	0.000668629	-0.000318986
63.5	0.000424948	2.67049e-05	0.000211474		63.5	0.000498379	-8.25322e-05	-0.000447686		63.5	0.000488271	-0.000702371		63.5	-0.000196082	7.58675e-05		63.5	4.64486e-05	0.000210254		63.5	7.01117e-05	-0.000471327	-4.48748e-06
64	0.000771692	9.11479e-05	-7.92202e-05		64	0.00052956	-0.000579722	-0.000135017		64	0.00108	-0.00177		64	0.000276858	9.55863e-05		64	-0.000231563	0.000209246		64	0.000837683	0.000580716	-0.000419989
64.5	0.000365436	-0.000380409	0.000344086		64.5	0.000560741	-0.000112912	-0.000305348		64.5	0.000631398	-0.000820499		64.5	1.47974e-05	-3.26948e-05		64.5	0.000208426	0.000208238		64.5	-7.4524e-07	2.57604e-05	-0.00025149
65	0.00071318	-0.000136966	-0.000304608		65	0.000430922	-0.000450102	-0.000314679		65	0.00123	-0.00152		65	4.67369e-05	-1.2976e-05		65	-6.9586e-05	0.000926229		65	0.000328826	-9.11957e-05	-0.000374991
65.5	0.000758924	-7.25233e-05	0.000297698		65.5	0.000623104	-0.000304293	-0.000163009		65.5	0.000949525	-0.00167		65.5	7.86764e-05	-0.000287257		65.5	0.000370402	-0.000512779		65.5	0.000366398	0.000375848	-0.000498492
66	0.000954668	-0.00018708	7.00364e-06		66	0.000493285	-0.000319483	-0.00033334		66	0.00172	-0.00237		66	-3.63842e-05	2.64617e-05		66	0.000451391	0.000924212		66	0.000257969	-0.000326108	-0.000183993
66.5	0.000699412	5.63626e-05	7.33096e-05		66.5	0.000846466	-0.000334673	-0.000181671		66.5	0.00162	-0.00179		66.5	0.000289555	-0.000394819		66.5	0.000892379	-0.00123		66.5	0.00103	0.00102	-0.000599495
67	0.00105	0.000120806	-0.000396384		67	0.000716647	-0.000349863	-0.000191002		67	0.00186	-0.00176		67	2.74948e-05	-8.11006e-05		67	0.000973368	0.000203196		67	0.000625112	2.49799e-05	-0.000138996
67.5	0.0009419	0.000185249	2.69215e-05		67.5	0.000908829	-0.000365053	-0.000200333		67.5	0.00176	-0.00209		67.5	0.000648434	-0.000650382		67.5	0.00105	-0.000875813		67.5	0.000662684	0.000492024	-0.000554497
68	0.00114	0.000249691	-0.000620773		68	0.00094001	-0.000219243	-0.000209664		68	0.00148	-0.000956949		68	9.13738e-05	-0.000188663		68	0.00149	-0.000876821		68	0.00114	0.000229068	-0.000239998
68.5	0.00118	0.000314134	-0.000197467		68.5	0.00113	-0.000556433	-0.000379994		68.5	0.00208	-0.00221		68.5	0.000712313	-0.000904944		68.5	0.000856333	-0.000158829		68.5	0.000883827	0.000404112	-0.000655499
69	0.00138	0.000199577	-0.000667161		69	0.001	-0.000571623	-0.000228325		69	0.00163	-0.00273		69	0.000449253	-0.000443225		69	0.00166	0.000559162		69	0.0018	0.000579156	-0.000341001
69.5	0.00112	0.00026402	-0.000421855		69.5	0.00119	-0.000586813	-0.000398656		69.5	0.00222	-0.00233		69.5	0.000628192	-0.00101		69.5	0.00138	-0.000879846		69.5	0.00095897	2.41995e-05	-0.000902502
70	0.00132	0.000507463	-0.000891549		70	0.00123	-0.000119003	-0.000246987		70	0.00212	-0.00284		70	0.000660132	-0.000551788		70	0.00218	-0.000161854		70	0.00143	0.00122	-0.000588003
70.5	0.00152	0.000392906	-0.000468243		70.5	0.00158	-0.000295194	-0.000256318		70.5	0.00219	-0.00336		70.5	0.000692071	-0.00112		70.5	0.0019	-0.000522863		70.5	0.00147	-6.47127e-05	-0.001
71	0.00171	0.000636349	-0.00112		71	0.00129	-0.000471384	-0.000265649		71	0.00261	-0.00278		71	0.00117	-0.00065935		71	0.00306	-0.000882871		71	0.00107	0.000695331	-0.000835005
71.5	0.00176	0.000521792	-0.000692631		71.5	0.0018	-0.000325574	-0.000274979		71.5	0.00251	-0.00348		71.5	0.00075595	-0.00138		71.5	0.00242	0.000554121		71.5	0.00228	0.000286375	-0.000812507
72	0.00196	0.000943235	-0.00116		72	0.00135	-0.000340764	-0.00028431		72	0.00328	-0.00271		72	0.00138	-0.00121		72	0.00322	-0.000165888		72	0.00129	-0.000123581	-0.00108
72.5	0.002	0.000650678	-0.000917019		72.5	0.00186	-0.000516954	-0.000132641		72.5	0.00283	-0.0036		72.5	0.000967829	-0.00104		72.5	0.00294	0.000911104		72.5	0.00235	0.000490463	-0.000913509
73	0.00175	0.000894121	-0.00103		73	0.00141	-0.000210144	-0.000302972		73	0.0036	-0.0043		73	0.00159	-0.00146		73	0.00374	-0.000167904		73	0.00166	-0.000357493	-0.00133
73.5	0.00209	0.000600564	-0.000963407		73.5	0.00193	-0.000386334	9.69735e-06		73.5	0.00332	-0.00316		73.5	0.000883708	-0.0013		73.5	0.00382	0.000190087		73.5	0.00199	0.00113	-0.000868511
74	0.00214	0.000844007	-0.00125		74	0.00164	-0.000240524	-0.000482633		74	0.00392	-0.00441		74	0.00195	-0.00172		74	0.0039	-0.000529921		74	0.00232	-0.000153405	-0.00143
74.5	0.00219	0.00072945	-0.00137		74.5	0.00199	-0.000577714	-0.000169964		74.5	0.00364	-0.00475		74.5	0.00168	-0.0014		74.5	0.00399	-0.000530929		74.5	0.00206	0.000898639	-0.000969514
75	0.00238	0.000972893	-0.00166		75	0.0017	-0.000270904	-0.000501295		75	0.00423	-0.00453		75	0.00245	-0.00197		75	0.00443	-0.00125		75	0.00269	0.000343683	-0.00153
75.5	0.00243	0.000680336	-0.00141		75.5	0.00221	-0.000608094	-0.000188626		75.5	0.00448	-0.00487		75.5	0.00204	-0.00151		75.5	0.00451	-0.000172946		75.5	0.00258	0.000518726	-0.00136
76	0.00247	0.000744779	-0.00188		76	0.00176	-0.000301285	-0.000519957		76	0.00438	-0.00538		76	0.00281	-0.00223		76	0.00603	-0.00125		76	0.00247	0.00025477	-0.00149
76.5	0.00267	0.000630222	-0.00164		76.5	0.00228	-0.000638475	-0.000207288		76.5	0.0048	-0.00443		76.5	0.00255	-0.00177		76.5	0.00683	-0.000893963		76.5	0.00294	-8.18571e-06	-0.00161
77	0.00257	0.000694665	-0.00211		77	0.00198	-0.000170665	-0.000699618		77	0.0047	-0.00568		77	0.00302	-0.00234		77	0.00655	-0.00125		77	0.00284	0.00104	-0.00144
77.5	0.00291	0.000402107	-0.00186		77.5	0.00234	-0.000507855	-0.000386949		77.5	0.00529	-0.00565		77.5	0.0032	-0.00202		77.5	0.00663	0.00018202		77.5	0.00317	-9.60979e-05	-0.00186
78	0.00281	0.00082355	-0.00215		78	0.00189	-4.0045e-05	-0.00055728		78	0.00484	-0.00599		78	0.00294	-0.00259		78	0.00599	0.000181012		78	0.0032	0.000955946	-0.00154
78.5	0.003	0.000351993	-0.00209		78.5	0.00256	-0.000377235	-0.000244611		78.5	0.00561	-0.00577		78.5	0.00356	-0.00213		78.5	0.00679	0.000180004		78.5	0.0028	0.00025399	-0.0021
79	0.0029	0.000773436	-0.00238		79	0.00211	-7.04252e-05	-0.000575942		79	0.00516	-0.00592		79	0.00315	-0.00285		79	0.00615	-0.00126		79	0.00342	0.000429034	-0.00179
79.5	0.00325	0.000480879	-0.00213		79.5	0.00262	-0.000407615	-0.000263273		79.5	0.00593	-0.00607		79.5	0.00392	-0.00239		79.5	0.00731	-0.00162		79.5	0.00332	0.000166078	-0.00235
80	0.00299	0.000724322	-0.00278		80	0.00233	-0.000100805	-0.000755603		80	0.00582	-0.00585		80	0.00351	-0.0031		80	0.00631	-0.000901021		80	0.00394	0.000341122	-0.00189
80.5	0.00334	0.000431765	-0.00254		80.5	0.00285	-0.000598995	-0.000281934		80.5	0.00572	-0.00619		80.5	0.00413	-0.00264		80.5	0.00747	-0.00090203		80.5	0.00383	0.000224166	-0.00245
81	0.00323	0.000674208	-0.00283		81	0.00239	-0.000131186	-0.000774265		81	0.00667	-0.00524		81	0.00372	-0.00321		81	0.00756	-0.000184038		81	0.00314	-3.87905e-05	-0.00199
81.5	0.00358	0.000381651	-0.00258		81.5	0.00291	-0.000629376	-0.000300596		81.5	0.00656	-0.00667		81.5	0.00434	-0.00334		81.5	0.00728	-0.000904046		81.5	0.00464	0.000867253	-0.00255
82	0.00332	0.000625094	-0.00269		82	0.00262	-0.000161566	-0.000631927		82	0.00699	-0.00627		82	0.00393	-0.00317		82	0.00736	-0.00127		82	0.0035	-0.000272703	-0.00224
82.5	0.00352	0.000331537	-0.00281		82.5	0.00313	-0.000498756	-0.000480257		82.5	0.00671	-0.00679		82.5	0.00396	-0.00359		82.5	0.0078	-0.00127		82.5	0.00456	0.00107	-0.00265
83	0.00341	0.00057498	-0.0031		83	0.00284	-0.000191946	-0.000650588		83	0.00713	-0.00676		83	0.00414	-0.00343		83	0.00788	-0.000907071		83	0.00416	7.73852e-05	-0.00249
83.5	0.00391	0.000282423	-0.00303		83.5	0.00319	-0.000529136	-0.000820919		83.5	0.00738	-0.00691		83.5	0.00432	-0.00385		83.5	0.00796	-0.00163		83.5	0.0042	0.000398429	-0.00261
84	0.00366	0.000703866	-0.00314		84	0.00306	-0.000222326	-0.00066925		84	0.00745	-0.00743		84	0.00465	-0.00339		84	0.0084	-0.00127		84	0.00512	0.000427473	-0.00273
84.5	0.00416	0.000232309	-0.00326		84.5	0.00342	-0.000398516	-0.000839581		84.5	0.00787	-0.00831		84.5	0.00468	-0.0041		84.5	0.00776	-0.00163		84.5	0.00428	-0.000127483	-0.00286
85	0.0039	0.000832752	-0.00355		85	0.00329	-9.17063e-05	-0.000526912		85	0.00742	-0.00828		85	0.00515	-0.00364		85	0.00892	-0.000911105		85	0.00534	0.000631561	-0.00327
85.5	0.0041	0.000361195	-0.00348		85.5	0.00348	-0.000106896	-0.000858242		85.5	0.00819	-0.00843		85.5	0.00474	-0.00436		85.5	0.00828	-0.000912113		85.5	0.00479	-0.000215395	-0.00281
86	0.00399	0.000782638	-0.00377		86	0.00351	-0.000122087	-0.000545573		86	0.00826	-0.00858		86	0.00551	-0.0039		86	0.00944	-0.000194122		86	0.00483	0.000982649	-0.0025
86.5	0.00434	0.000490081	-0.00353		86.5	0.00338	-0.000137277	-0.000876904		86.5	0.00868	-0.00854		86.5	0.0051	-0.00461		86.5	0.0088	-0.00091413		86.5	0.0053	0.000134693	-0.00174
87	0.00408	0.000733524	-0.00382		87	0.00325	-0.000152467	-0.000564235		87	0.0084	-0.00906		87	0.00557	-0.00415		87	0.00996	-0.00128		87	0.00519	0.000455736	-0.00216
87.5	0.00443	0.000439966	-0.00375		87.5	0.00377	-0.000167657	-0.00106		87.5	0.00865	-0.00774		87.5	0.00531	-0.00487		87.5	0.00933	-0.002		87.5	0.00596	0.00019278	-0.00199
88	0.00432	0.000683409	-0.00422		88	0.00364	-0.000343847	-0.000904897		88	0.00889	-0.009		88	0.00593	-0.0044		88	0.01049	-0.00236		88	0.00571	-0.000216176	-0.00226
88.5	0.00467	0.000390852	-0.0038		88.5	0.00399	-0.000198037	-0.000914227		88.5	0.00879	-0.00915		88.5	0.00611	-0.00483		88.5	0.00985	-0.00164		88.5	0.00545	0.000250868	-0.00209
89	0.00472	0.000455295	-0.00445		89	0.0037	-0.000535227	-0.000762558		89	0.00939	-0.00985		89	0.00644	-0.00466		89	0.01065	-0.00164		89	0.00578	-0.000596088	-0.00207
89.5	0.00476	0.000162738	-0.00402		89.5	0.00389	-0.000228417	-0.000932889		89.5	0.00928	-0.00926		89.5	0.00632	-0.00538		89.5	0.01037	-0.00092018		89.5	0.00582	0.000892956	-0.00234
90	0.00451	0.000227181	-0.00449		90	0.00376	-0.000565607	-0.00078122		90	0.00988	-0.00996		90	0.00665	-0.00492		90	0.01117	-0.002		90	0.00644	-0.000392	-0.00203
90.5	0.00486	0.000291624	-0.00425		90.5	0.00411	-0.000258797	-0.000951551		90.5	0.01013	-0.00956		90.5	0.00668	-0.00534		90.5	0.01089	-0.002		90.5	0.00633	0.000367044	-0.00244
91	0.0049	0.000356067	-0.00472		91	0.00415	-0.000756987	-0.000799881		91	0.00967	-0.01008		91	0.00671	-0.00532		91	0.01133	-0.00272		91	0.00593	0.000104088	-0.00227
91.5	0.00525	0.00042051	-0.00429		91.5	0.00418	-0.000289178	-0.00113		91.5	0.01027	-0.01042		91.5	0.00689	-0.00544		91.5	0.01213	-0.00272		91.5	0.00699	-1.28683e-05	-0.00269
92	0.00514	0.000305953	-0.00476		92	0.00437	-0.000787368	-0.000818543		92	0.00999	-0.00983		92	0.00692	-0.00601		92	0.01149	-0.00236		92	0.00615	0.000308176	-0.00237
92.5	0.00519	0.000549396	-0.0047		92.5	0.00424	-0.000319558	-0.00131		92.5	0.01041	-0.01053		92.5	0.00725	-0.0057		92.5	0.01157	-0.00201		92.5	0.00765	-0.00068478	-0.00264
93	0.00523	0.000255839	-0.00481		93	0.00427	-0.000817748	-0.000837205		93	0.01049	-0.01013		93	0.00714	-0.00627		93	0.01166	-0.00165		93	0.00696	0.000366263	-0.00247
93.5	0.00528	0.000499282	-0.00474		93.5	0.0043	-0.000349938	-0.00133		93.5	0.01038	-0.01028		93.5	0.00746	-0.00596		93.5	0.01282	-0.00165		93.5	0.007	-0.000480693	-0.00274
94	0.00548	0.000563725	-0.00503		94	0.00465	-0.000848128	-0.00102		94	0.01098	-0.01062		94	0.00749	-0.00652		94	0.0111	-0.00165		94	0.00762	0.000716351	-0.0017
94.5	0.00552	0.000271168	-0.00497		94.5	0.00404	-0.000541318	-0.00135		94.5	0.01088	-0.01114		94.5	0.00782	-0.00621		94.5	0.01262	-0.00237		94.5	0.00707	-0.000568605	-0.00211
95	0.00542	0.000513611	-0.00544		95	0.00456	-0.000717508	-0.000874528		95	0.01112	-0.01		95	0.00756	-0.00678		95	0.01162	-0.00309		95	0.00857	-0.000101561	-0.00282
95.5	0.00561	0.000400054	-0.00501		95.5	0.0041	-0.000571698	-0.00137		95.5	0.01119	-0.01107		95.5	0.00818	-0.00647		95.5	0.01278	-0.00309		95.5	0.00729	7.3483e-05	-0.00251
96	0.00551	0.000285497	-0.00548		96	0.00462	-0.000747888	-0.00105		96	0.01126	-0.01159		96	0.00777	-0.00703		96	0.01178	-0.00381		96	0.00777	-0.000481473	-0.00292
96.5	0.00571	0.00052894	-0.00524		96.5	0.00433	-0.000602079	-0.00155		96.5	0.01186	-0.01064		96.5	0.00809	-0.00687		96.5	0.01258	-0.00309		96.5	0.00781	-1.44292e-05	-0.00261
97	0.0056	0.000235382	-0.00589		97	0.00468	-0.000778269	-0.00123		97	0.01141	-0.01207		97	0.00798	-0.00744		97	0.0123	-0.00273		97	0.0077	-0.000715385	-0.00288
97.5	0.00595	0.000478825	-0.00546		97.5	0.00439	-0.000632459	-0.00157		97.5	0.01235	-0.01241		97.5	0.0086	-0.00712		97.5	0.0131	-0.00166		97.5	0.00876	-0.000102341	-0.00286
98	0.00584	0.000186268	-0.00593		98	0.0049	-0.000647649	-0.00125		98	0.01208	-0.01201		98	0.00819	-0.00769		98	0.01283	-0.00238		98	0.00821	-0.000949297	-0.00298
98.5	0.00604	0.000428711	-0.00551		98.5	0.00445	-0.000823839	-0.00174		98.5	0.01267	-0.01271		98.5	0.00896	-0.00752		98.5	0.01327	-0.0031		98.5	0.0084	0.000247746	-0.0031
99	0.00593	0.000136154	-0.00616		99	0.00513	-0.000517029	-0.00127		99	0.01257	-0.01359		99	0.00855	-0.00795		99	0.01263	-0.0031		99	0.00931	-0.00074521	-0.00308
99.5	0.00613	0.000736597	-0.00573		99.5	0.00451	-0.000854219	-0.00144		99.5	0.01264	-0.01227		99.5	0.00917	-0.00778		99.5	0.01343	-0.0031		99.5	0.00891	-0.000278166	-0.00335
100	0.00618	0.00044404	-0.0062		100	0.00503	-0.000708409	-0.000967836		100	0.01341	-0.01353		100	0.00891	-0.0082		100	0.01315	-0.00274		100	0.00895	-0.000103122	-0.00333
100.5	0.00622	0.000686483	-0.00578		100.5	0.00474	-0.000562599	-0.00146		100.5	0.01296	-0.01386		100.5	0.00938	-0.00818		100.5	0.01395	-0.00274		100.5	0.00942	-0.000658078	-0.0036
101	0.00612	3.69261e-05	-0.00643		101	0.00525	-0.000577789	-0.00115		101	0.01321	-0.01291		101	0.00927	-0.00802		101	0.01439	-0.00274		101	0.00902	-4.5034e-05	-0.00343
101.5	0.00631	0.000458369	-0.00636		101.5	0.0048	-0.000592979	-0.00164		101.5	0.01363	-0.01398		101.5	0.00945	-0.00858		101.5	0.01411	-0.00202		101.5	0.01037	-0.00089199	-0.00399
102	0.00651	-1.3188e-05	-0.00647		102	0.00531	-0.00060817	-0.00117		102	0.01335	-0.01394		102	0.00962	-0.00827		102	0.01491	-0.0031		102	0.00953	0.000159054	-0.00353
102.5	0.00656	0.000408255	-0.00659		102.5	0.00502	-0.00078436	-0.00166		102.5	0.01412	-0.0141		102.5	0.00966	-0.00884		102.5	0.01427	-0.00238		102.5	0.00957	-0.000395902	-0.00409
103	0.00645	-6.23021e-05	-0.00652		103	0.00538	-0.00047755	-0.00135		103	0.01402	-0.01425		103	0.00998	-0.00853		103	0.01507	-0.00418		103	0.01034	-0.000366858	-0.00378
103.5	0.00665	0.000359141	-0.00663		103.5	0.00525	-0.00081474	-0.00184		103.5	0.01409	-0.01348		103.5	0.00987	-0.00909		103.5	0.01479	-0.00347		103.5	0.00979	-4.58144e-05	-0.00419
104	0.00669	0.000244584	-0.00656		104	0.00544	-0.00034693	-0.00153		104	0.01451	-0.01473		104	0.01034	-0.00878		104	0.01631	-0.00419		104	0.01071	-0.00074677	-0.00373
104.5	0.00674	0.000488027	-0.00668		104.5	0.00531	-0.00084512	-0.00186		104.5	0.01406	-0.01451		104.5	0.01008	-0.00935		104.5	0.01496	-0.00419		104.5	0.01016	-0.000425727	-0.004
105	0.00678	0.00037347	-0.00679		105	0.0055	-0.00053831	-0.00171		105	0.01465	-0.0143		105	0.01055	-0.00889		105	0.01576	-0.00347		105	0.01034	-0.000980683	-0.00427
105.5	0.00698	0.000616913	-0.00672		105.5	0.00553	-0.0008755	-0.00188		105.5	0.01437	-0.015		105.5	0.01029	-0.00975		105.5	0.01512	-0.00383		105.5	0.01097	-7.56387e-05	-0.00396
106	0.00688	0.000145356	-0.00701		106	0.00556	-0.00056869	-0.00188		106	0.0148	-0.0157		106	0.01076	-0.00929		106	0.01556	-0.00275		106	0.01056	-0.000338595	-0.00452
106.5	0.00722	0.000566798	-0.00695		106.5	0.00543	-0.00107	-0.00206		106.5	0.01469	-0.01512		106.5	0.01035	-0.00986		106.5	0.016	-0.00383		106.5	0.01016	-0.000601551	-0.00406
107	0.00697	0.000274241	-0.00724		107	0.00579	-0.000599071	-0.00206		107	0.01494	-0.01563		107	0.01097	-0.0094		107	0.01572	-0.00347		107	0.01137	-0.000134507	-0.00462
107.5	0.00732	0.000695684	-0.00717		107.5	0.0055	-0.0011	-0.00207		107.5	0.01536	-0.01633		107.5	0.01086	-0.01011		107.5	0.0158	-0.00383		107.5	0.01068	-0.000981463	-0.0043
108	0.00736	0.000224127	-0.00764		108	0.00601	-0.000629451	-0.00176		108	0.01508	-0.0152		108	0.01119	-0.0098		108	0.01624	-0.00419		108	0.01101	-7.64192e-05	-0.00472
108.5	0.00756	0.00046757	-0.00758		108.5	0.00572	-0.00113	-0.00225		108.5	0.01568	-0.01645		108.5	0.01122	-0.01037		108.5	0.01632	-0.00527		108.5	0.01163	-0.000777375	-0.00455
109	0.00745	0.000175013	-0.00769		109	0.00591	-0.000820831	-0.0021		109	0.0154	-0.01642		109	0.0114	-0.01005		109	0.01605	-0.00384		109	0.01079	0.000419669	-0.00482
109.5	0.00765	0.000417456	-0.0078		109.5	0.00578	-0.00116	-0.00227		109.5	0.01617	-0.0162		109.5	0.01158	-0.01077		109.5	0.01613	-0.00527		109.5	0.012	-0.000573287	-0.0048
110	0.00739	0.000124899	-0.00791		110	0.00613	-0.000690211	-0.00228		110	0.01624	-0.01635		110	0.01161	-0.01031		110	0.01693	-0.00384		110	0.01145	-0.000398244	-0.00492
110.5	0.00774	0.000368342	-0.00785		110.5	0.006	-0.00119	-0.00229		110.5	0.01579	-0.01632		110.5	0.01179	-0.01103		110.5	0.01629	-0.00492		110.5	0.01163	-0.0002232	-0.00505
111	0.00764	7.4785e-05	-0.00814		111	0.0062	-0.000720591	-0.0023		111	0.01639	-0.01647		111	0.01167	-0.01086		111	0.01637	-0.00492		111	0.01196	-0.000924156	-0.00488
111.5	0.00783	0.000139228	-0.00807		111.5	0.00607	-0.00106	-0.00231		111.5	0.01611	-0.01644		111.5	0.01215	-0.01084		111.5	0.01717	-0.00564		111.5	0.012	-0.000457112	-0.00529
112	0.00773	2.56709e-05	-0.008		112	0.0061	-0.000750972	-0.00248		112	0.0167	-0.0164		112	0.01188	-0.01126		112	0.01725	-0.00564		112	0.0116	-0.00116	-0.00498
112.5	0.00792	9.01139e-05	-0.0083		112.5	0.00629	-0.00125	-0.00233		112.5	0.01678	-0.01674		112.5	0.0125	-0.01124		112.5	0.01733	-0.00672		112.5	0.01295	3.8976e-05	-0.00539
113	0.00782	-2.44432e-05	-0.00805		113	0.00664	-0.000942352	-0.00266		113	0.0165	-0.01744		113	0.01195	-0.01152		113	0.01741	-0.00528		113	0.01226	-0.00080798	-0.00508
113.5	0.00817	0.000219	-0.00852		113.5	0.00651	-0.00144	-0.00235		113.5	0.01709	-0.01667		113.5	0.01271	-0.01135		113.5	0.01713	-0.006		113.5	0.01186	-0.000632936	-0.00564
114	0.00806	-0.000252557	-0.00845		114	0.00622	-0.000972732	-0.00268		114	0.01682	-0.01774		114	0.01245	-0.01177		114	0.01721	-0.00528		114	0.01336	-0.000311892	-0.00533
114.5	0.00811	0.000168886	-0.00857		114.5	0.00658	-0.00131	-0.0022		114.5	0.01741	-0.01826		114.5	0.01293	-0.0116		114.5	0.0173	-0.00564		114.5	0.01223	-0.00101	-0.00545
115	0.00815	-0.000302671	-0.0085		115	0.00629	-0.00116	-0.0027		115	0.01748	-0.01841		115	0.01252	-0.01217		115	0.01738	-0.00529		115	0.0127	-0.000399804	-0.00587
115.5	0.0085	0.000118772	-0.00879		115.5	0.00664	-0.0015	-0.00238		115.5	0.01721	-0.01838		115.5	0.01328	-0.01171		115.5	0.0171	-0.00529		115.5	0.01332	-0.00125	-0.00555
116	0.00839	-0.000173785	-0.00873		116	0.00667	-0.00136	-0.00272		116	0.0178	-0.01706		116	0.01273	-0.01243		116	0.01718	-0.00493		116	0.01292	9.62834e-05	-0.00611
116.5	0.00859	0.000247657	-0.00902		116.5	0.00654	-0.00137	-0.00256		116.5	0.01752	-0.01831		116.5	0.01349	-0.01211		116.5	0.01762	-0.00565		116.5	0.01281	-0.00119	-0.00565
117	0.00833	-4.48996e-05	-0.00895		117	0.00689	-0.00139	-0.00306		117	0.01795	-0.01828		117	0.01309	-0.01268		117	0.0177	-0.00601		117	0.01387	-0.000429629	-0.00621
117.5	0.00868	0.000198543	-0.00906		117.5	0.0066	-0.0014	-0.00274		117.5	0.01819	-0.01788		117.5	0.01341	-0.01222		117.5	0.01778	-0.00745		117.5	0.01377	-0.000692585	-0.0059
118	0.00858	8.39863e-05	-0.00935		118	0.00696	-0.00142	-0.00324		118	0.01791	-0.01821		118	0.01389	-0.01279		118	0.01714	-0.00745		118	0.01439	-0.000809541	-0.00646
118.5	0.00877	0.000148429	-0.00929		118.5	0.00683	-0.00127	-0.00276		118.5	0.01851	-0.01928		118.5	0.01348	-0.01248		118.5	0.0183	-0.00673		118.5	0.01428	-0.000634497	-0.006
119	0.00852	0.000212872	-0.0094		119	0.00718	-0.00161	-0.00325		119	0.01841	-0.01833		119	0.0141	-0.01319		119	0.01802	-0.00673		119	0.01359	-0.00134	-0.00642
119.5	0.00902	9.93152e-05	-0.00933		119.5	0.00705	-0.00162	-0.00294		119.5	0.0183	-0.0183		119.5	0.01369	-0.01273		119.5	0.01918	-0.00601		119.5	0.01538	-0.000138409	-0.00625
120	0.00876	0.000341758	-0.00944		120	0.00724	-0.00132	-0.00327		120	0.01907	-0.01863		120	0.01416	-0.01345		120	0.01819	-0.00601		120	0.01425	-0.00113	-0.00652
120.5	0.00911	0.000228201	-0.00956		120.5	0.00711	-0.00149	-0.00296		120.5	0.0188	-0.0197		120.5	0.0139	-0.01343		120.5	0.01935	-0.00602		120.5	0.01414	-0.000518321	-0.00635
121	0.009	0.000470644	-0.00967		121	0.00714	-0.00151	-0.00329		121	0.01904	-0.01893		121	0.01437	-0.01326		121	0.01835	-0.00602		121	0.01505	-0.000635277	-0.00662
121.5	0.00905	0.000178087	-0.00996		121.5	0.00717	-0.00152	-0.00314		121.5	0.01929	-0.01908		121.5	0.01411	-0.01383		121.5	0.01951	-0.00638		121.5	0.01436	-0.00134	-0.00674
122	0.00924	0.00059953	-0.00972		122	0.0072	-0.0017	-0.00331		122	0.01901	-0.01996		122	0.01443	-0.01337		122	0.01851	-0.00638		122	0.01615	-0.00013919	-0.00657
122.5	0.00914	0.000306973	-0.01001		122.5	0.00724	-0.00155	-0.00332		122.5	0.01978	-0.01865		122.5	0.01432	-0.01409		122.5	0.02003	-0.00674		122.5	0.01487	-0.00143	-0.00684
123	0.00934	0.000371416	-0.00976		123	0.00727	-0.00173	-0.00333		123	0.01933	-0.02008		123	0.01465	-0.01362		123	0.01831	-0.00674		123	0.01506	-0.000373102	-0.00667
123.5	0.00938	0.000614859	-0.0097		123.5	0.0073	-0.00158	-0.0035		123.5	0.01958	-0.01987		123.5	0.01453	-0.01434		123.5	0.02019	-0.00818		123.5	0.01553	-0.00108	-0.00709
124	0.00943	0.000500302	-0.01016		124	0.00733	-0.00176	-0.00335		124	0.02	-0.01947		124	0.01486	-0.01388		124	0.01883	-0.00782		124	0.01528	-0.000607014	-0.00677
124.5	0.00962	0.000743745	-0.00974		124.5	0.00752	-0.00145	-0.00368		124.5	0.01954	-0.02035		124.5	0.01474	-0.0146		124.5	0.02035	-0.00818		124.5	0.01546	-0.00116	-0.00719
125	0.00937	0.000450188	-0.01021		125	0.00739	-0.00163	-0.00337		125	0.02032	-0.02032		125	0.01507	-0.01458		125	0.019	-0.00746		125	0.01623	-0.000987926	-0.00717
125.5	0.00972	0.000693631	-0.00979		125.5	0.00758	-0.00132	-0.00386		125.5	0.01986	-0.0201		125.5	0.01495	-0.0147		125.5	0.02052	-0.00818		125.5	0.01597	-0.000519882	-0.007
126	0.00961	0.000401073	-0.01044		126	0.00762	-0.00182	-0.00339		126	0.02046	-0.0208		126	0.01513	-0.01439		126	0.01988	-0.00746		126	0.01733	-0.000929838	-0.00742
126.5	0.00966	0.000643516	-0.00983		126.5	0.00732	-0.00167	-0.00404		126.5	0.02053	-0.0215		126.5	0.01561	-0.01481		126.5	0.02068	-0.00711		126.5	0.01722	-0.00105	-0.0071
127	0.0097	0.000529959	-0.01048		127	0.00784	-0.00169	-0.00389		127	0.02043	-0.02037		127	0.0152	-0.01523		127	0.02004	-0.00747		127	0.01798	-0.00087175	-0.00766
127.5	0.00975	0.000594402	-0.01006		127.5	0.00755	-0.00187	-0.00406		127.5	0.02085	-0.02162		127.5	0.01596	-0.01507		127.5	0.02048	-0.00675		127.5	0.01758	-0.00113	-0.00735
128	0.00964	0.000479845	-0.01071		128	0.00774	-0.00172	-0.0039		128	0.02057	-0.0214		128	0.01555	-0.01549		128	0.0202	-0.00819		128	0.01864	-0.000959663	-0.00776
128.5	0.00999	0.000544288	-0.01028		128.5	0.00761	-0.0019	-0.00424		128.5	0.02117	-0.021		128.5	0.01618	-0.01532		128.5	0.021	-0.00783		128.5	0.01839	-0.00137	-0.00774
129	0.00989	0.000608731	-0.01075		129	0.00796	-0.00159	-0.00408		129	0.02124	-0.02134		129	0.01576	-0.01574		129	0.02036	-0.00963		129	0.01857	-0.000755575	-0.00786
129.5	0.01008	0.000494174	-0.01051		129.5	0.00767	-0.00193	-0.00442		129.5	0.02078	-0.02241		129.5	0.01639	-0.01543		129.5	0.02044	-0.00855		129.5	0.01905	-0.00116	-0.00784
130	0.00998	0.000380617	-0.0108		130	0.00803	-0.00178	-0.00394		130	0.02138	-0.02127		130	0.01627	-0.016		130	0.02088	-0.00963		130	0.01879	-0.00128	-0.00782
130.5	0.01032	0.00026606	-0.01055		130.5	0.00773	-0.00196	-0.00443		130.5	0.0218	-0.02197		130.5	0.01645	-0.01554		130.5	0.02132	-0.00855		130.5	0.02	-0.000668443	-0.00794
131	0.01037	0.000509503	-0.01102		131	0.00777	-0.00165	-0.00412		131	0.02117	-0.02176		131	0.01648	-0.01581		131	0.02105	-0.00963		131	0.01916	-0.00152	-0.00792
131.5	0.01027	0.000394946	-0.0106		131.5	0.00796	-0.00215	-0.00461		131.5	0.02177	-0.02191		131.5	0.01681	-0.01579		131.5	0.02149	-0.00855		131.5	0.01964	-0.00119	-0.00819
132	0.01031	0.000816389	-0.01143		132	0.00783	-0.00184	-0.00414		132	0.02149	-0.02279		132	0.01669	-0.01607		132	0.02121	-0.00927		132	0.01997	-0.00131	-0.00788
132.5	0.01036	0.000344832	-0.01082		132.5	0.00802	-0.00218	-0.00463		132.5	0.02174	-0.02166		132.5	0.01687	-0.01619		132.5	0.02201	-0.00784		132.5	0.01942	-0.000698267	-0.00829
133	0.0104	0.000409275	-0.01129		133	0.00789	-0.00171	-0.00432		133	0.02216	-0.02273		133	0.01661	-0.01632		133	0.02137	-0.00892		133	0.02106	-0.00125	-0.00798
133.5	0.0106	0.000652718	-0.01087		133.5	0.00824	-0.00237	-0.00481		133.5	0.02188	-0.02288		133.5	0.01694	-0.0166		133.5	0.02217	-0.0082		133.5	0.01979	-0.00137	-0.00825
134	0.01049	0.000717161	-0.01134		134	0.00795	-0.0019	-0.0045		134	0.02265	-0.02248		134	0.01697	-0.01643		134	0.02153	-0.00892		134	0.02055	-0.000757136	-0.00837
134.5	0.01069	0.000602604	-0.01127		134.5	0.00815	-0.0024	-0.00499		134.5	0.02255	-0.02318		134.5	0.01744	-0.01671		134.5	0.02233	-0.01		134.5	0.02059	-0.0016	-0.0082
135	0.01043	0.000667047	-0.01156		135	0.00802	-0.00193	-0.00468		135	0.02262	-0.02259		135	0.01747	-0.01654		135	0.02133	-0.00928		135	0.02063	-0.000991048	-0.00862
135.5	0.01078	0.000374489	-0.01114		135.5	0.00837	-0.00243	-0.00501		135.5	0.02304	-0.02311		135.5	0.01721	-0.01711		135.5	0.02285	-0.01036		135.5	0.02169	-0.00169	-0.00845
136	0.01068	0.000617932	-0.01143		136	0.0084	-0.00196	-0.00502		136	0.02259	-0.02308		136	0.01769	-0.01679		136	0.0215	-0.01		136	0.021	-0.00093296	-0.00886
136.5	0.01072	0.000682375	-0.01154		136.5	0.00827	-0.00246	-0.00519		136.5	0.02301	-0.02286		136.5	0.01713	-0.01736		136.5	0.02266	-0.01072		136.5	0.02089	-0.0012	-0.00869
137	0.01092	0.000567818	-0.01166		137	0.00862	-0.00215	-0.00504		137	0.02273	-0.0232		137	0.01775	-0.0172		137	0.02202	-0.01036		137	0.0218	-0.00131	-0.00896
137.5	0.01096	0.000275261	-0.01177		137.5	0.00833	-0.00249	-0.00537		137.5	0.0228	-0.02445		137.5	0.01749	-0.01776		137.5	0.02282	-0.01036		137.5	0.02082	-0.000845828	-0.00894
138	0.01086	0.000696704	-0.0117		138	0.00852	-0.00235	-0.00522		138	0.02323	-0.02313		138	0.01781	-0.0173		138	0.02182	-0.00857		138	0.021	-0.00184	-0.00892
138.5	0.01106	0.000225147	-0.01199		138.5	0.00839	-0.00236	-0.00555		138.5	0.02295	-0.0242		138.5	0.0177	-0.01787		138.5	0.02334	-0.01037		138.5	0.02133	-0.00093374	-0.00919
139	0.01095	0.00064759	-0.01211		139	0.00859	-0.00222	-0.0054		139	0.02337	-0.02453		139	0.01773	-0.01756		139	0.02198	-0.00857		139	0.02093	-0.00178	-0.00902
139.5	0.01115	0.000533033	-0.01222		139.5	0.00846	-0.00255	-0.00557		139.5	0.02379	-0.02395		139.5	0.01806	-0.01827		139.5	0.0235	-0.01145		139.5	0.02228	-0.000437653	-0.00944
140	0.01104	0.000776476	-0.01179		140	0.00865	-0.00225	-0.00542		140	0.02334	-0.02483		140	0.01779	-0.01796		140	0.02214	-0.00965		140	0.02174	-0.00128	-0.00912
140.5	0.01124	0.000482919	-0.01226		140.5	0.00852	-0.00258	-0.00575		140.5	0.02376	-0.0248		140.5	0.01812	-0.01823		140.5	0.02223	-0.01181		140.5	0.02134	-0.000963565	-0.00954
141	0.01128	0.000726362	-0.01202		141	0.00871	-0.00228	-0.0056		141	0.02366	-0.02458		141	0.01771	-0.01821		141	0.02267	-0.01073		141	0.02254	-0.000934521	-0.00922
141.5	0.01133	0.000433805	-0.01213		141.5	0.00858	-0.00261	-0.00577		141.5	0.02373	-0.02492		141.5	0.01833	-0.01849		141.5	0.02239	-0.01145		141.5	0.02156	-0.00149	-0.00978
142	0.01138	0.000676248	-0.01224		142	0.00877	-0.00231	-0.00578		142	0.02432	-0.02489		142	0.01777	-0.01862		142	0.02283	-0.01145		142	0.0232	-0.000292433	-0.00932
142.5	0.01157	0.000204691	-0.01236		142.5	0.00864	-0.00264	-0.00578		142.5	0.02405	-0.02449		142.5	0.01854	-0.0186		142.5	0.02219	-0.01109		142.5	0.02178	-0.00187	-0.00988
143	0.01162	0.000627134	-0.01247		143	0.00884	-0.00266	-0.00596		143	0.02464	-0.02555		143	0.01813	-0.01887		143	0.02299	-0.01145		143	0.02255	-0.000964345	-0.00957
143.5	0.01166	0.000512577	-0.01258		143.5	0.00887	-0.00267	-0.0058		143.5	0.02454	-0.02552		143.5	0.01875	-0.01871		143.5	0.02199	-0.01038		143.5	0.02244	-0.00137	-0.00984
144	0.01156	0.00057702	-0.01251		144	0.0089	-0.00285	-0.00597		144	0.02461	-0.02494		144	0.01834	-0.01927		144	0.02279	-0.01146		144	0.02233	-0.00149	-0.01011
144.5	0.01176	0.000462463	-0.0128		144.5	0.00893	-0.00254	-0.00598		144.5	0.02486	-0.02527		144.5	0.01867	-0.01881		144.5	0.02323	-0.01038		144.5	0.02295	-0.00161	-0.00979
145	0.0118	0.000705906	-0.01274		145	0.00912	-0.00288	-0.00631		145	0.02458	-0.0256		145	0.01841	-0.01953		145	0.02331	-0.01146		145	0.02255	-0.00202	-0.01021
145.5	0.012	0.000413348	-0.01303		145.5	0.00899	-0.00257	-0.00616		145.5	0.02535	-0.02484		145.5	0.01888	-0.01922		145.5	0.0234	-0.01146		145.5	0.02244	-0.000965126	-0.0099
146	0.01189	0.000477791	-0.01296		146	0.00935	-0.00291	-0.00649		146	0.02472	-0.02536		146	0.01891	-0.01978		146	0.02276	-0.01146		146	0.02292	-0.00196	-0.01031
146.5	0.01194	0.000363234	-0.01325		146.5	0.00889	-0.00244	-0.00618		146.5	0.02532	-0.02624		146.5	0.01865	-0.01932		146.5	0.02356	-0.01182		146.5	0.02266	-0.00105	-0.01
147	0.01198	0.000784677	-0.01301		147	0.00941	-0.0031	-0.00635		147	0.02521	-0.02602		147	0.01942	-0.01989		147	0.02328	-0.01218		147	0.02358	-0.00146	-0.01056
147.5	0.01233	0.00031412	-0.0133		147.5	0.00912	-0.00263	-0.00636		147.5	0.02528	-0.02636		147.5	0.01886	-0.01973		147.5	0.02372	-0.01182		147.5	0.02318	-0.00114	-0.01024
148	0.01223	0.000735563	-0.01306		148	0.00947	-0.00297	-0.00653		148	0.02571	-0.02596		148	0.01963	-0.02015		148	0.0238	-0.01398		148	0.02292	-0.00155	-0.01066
148.5	0.01242	0.000264006	-0.01335		148.5	0.00902	-0.00266	-0.00654		148.5	0.02525	-0.02611		148.5	0.01922	-0.01998		148.5	0.02352	-0.01254		148.5	0.02384	-0.00152	-0.01064
149	0.01232	0.000685449	-0.0131		149	0.00953	-0.00316	-0.00671		149	0.0255	-0.02516		149	0.01984	-0.02026		149	0.02432	-0.0129		149	0.02373	-0.0012	-0.01047
149.5	0.01251	0.000213892	-0.01357		149.5	0.00924	-0.0027	-0.00656		149.5	0.0261	-0.02641		149.5	0.01943	-0.02024		149.5	0.02404	-0.01219		149.5	0.02449	-0.00175	-0.01074
150	0.01256	0.000814335	-0.01297							150	0.02547			150	0.02005	-0.02007		150	0.02448	-0.01255		150	0.02424	-0.00114	-0.01057
150.5	0.01261	0.000342778	-0.01344											150.5	0.02023	-0.02079		150.5	0.02421	-0.01219		150.5	0.02355	-0.00155	-0.01113
151	0.0125	0.000765221	-0.01355											151	0.01997	-0.02032		151	0.02465	-0.01255		151	0.02475	-0.00138	-0.01067
151.5	0.0127	0.000293664	-0.01366											151.5	0.02015	-0.02104		151.5	0.02437	-0.01219		151.5	0.02377	-0.00164	-0.01138
152	0.01259	0.000536107	-0.01378											152	0.02003	-0.02058		152	0.02409	-0.01291		152	0.02541	-0.00161	-0.01092
152.5	0.01279	0.00042255	-0.01389											152.5	0.02036	-0.02115		152.5	0.02525	-0.01327		152.5	0.02414	-0.00129	-0.01133
153	0.01268	0.000843993	-0.01364											153	0.0201	-0.02098		153	0.02461	-0.01435		153	0.02417	-0.00184	-0.01102
153.5	0.01288	0.000372436	-0.01376											153.5	0.02057	-0.02126		153.5	0.02505	-0.01363		153.5	0.02494	-0.00108	-0.01114
154	0.01293	0.000615879	-0.01369											154	0.02016	-0.02124		154	0.02477	-0.01399		154	0.02425	-0.00135	-0.01141
154.5	0.01297	0.000501322	-0.01398											154.5	0.02063	-0.02122		154.5	0.02521	-0.01435		154.5	0.02589	-0.00132	-0.01124
155	0.01302	0.000565764	-0.01374											155	0.02037	-0.02164		155	0.02565	-0.01435		155	0.02432	-0.00144	-0.01166
155.5	0.01306	0.000630207	-0.01403											155.5	0.02055	-0.02132		155.5	0.02537	-0.01364		155.5	0.02509	-0.00155	-0.01134
156	0.01326	0.00069465	-0.01378											156	0.02088	-0.02189		156	0.02617	-0.01436		156	0.02513	-0.00138	-0.01191
156.5	0.013	0.000759093	-0.01407											156.5	0.02061	-0.02173		156.5	0.02554	-0.01328		156.5	0.02487	-0.00164	-0.01145
157	0.01305	0.000644536	-0.01401											157	0.02109	-0.02229		157	0.02598	-0.01364		157	0.02652	-0.00147	-0.01201
157.5	0.0134	0.000887979	-0.0143											157.5	0.02068	-0.02183		157.5	0.02498	-0.014		157.5	0.02495	-0.00144	-0.01184
158	0.01329	0.000595422	-0.01387											158	0.0213	-0.0224		158	0.02614	-0.01364		158	0.02557	-0.00155	-0.01182
158.5	0.01349	0.000837865	-0.01434											158.5	0.02104	-0.02194		158.5	0.0255	-0.01472		158.5	0.02546	-0.00152	-0.01194
159	0.01338	0.000545308	-0.0141											159	0.02151	-0.02251		159	0.02594	-0.01508		159	0.0255	-0.00179	-0.01206
159.5	0.01358	0.000788751	-0.01439											159.5	0.02125	-0.0222		159.5	0.02602	-0.01544		159.5	0.02627	-0.00147	-0.01219
160	0.01348	0.000317194	-0.01414											160	0.02172	-0.02232		160	0.02574	-0.01544		160	0.02572	-0.00187	-0.01202
160.5	0.01352	0.000917637	-0.01479											160.5	0.02146	-0.02289		160.5	0.02618	-0.01508		160.5	0.02576	-0.00126	-0.01243
161	0.01372	0.00044608	-0.01437											161	0.02178	-0.02243		161	0.02627	-0.01509		161	0.02623	-0.00138	-0.01241
161.5	0.01391	0.000867523	-0.01484											161.5	0.02182	-0.023		161.5	0.02563	-0.01509		161.5	0.0254	-0.0015	-0.01283
162	0.01381	0.000574966	-0.01441											162	0.02185	-0.02269		162	0.02643	-0.01473		162	0.02689	-0.00147	-0.01266
162.5	0.01385	0.000996409	-0.01506											162.5	0.02203	-0.0234		162.5	0.02615	-0.01473		162.5	0.02576	-0.00188	-0.01293
163	0.01405	0.000703852	-0.01464											163	0.02191	-0.02294		163	0.02695	-0.01437		163	0.02595	-0.00155	-0.01305
163.5	0.0138	0.000946295	-0.01511											163.5	0.02224	-0.02307		163.5	0.02631	-0.01509		163.5	0.02657	-0.00182	-0.01274
164	0.01399	0.000653738	-0.01469											164	0.02183	-0.0232		164	0.02603	-0.01473		164	0.02588	-0.00164	-0.01315
164.5	0.01404	0.00108	-0.01515											164.5	0.02245	-0.02332		164.5	0.02683	-0.01617		164.5	0.02737	-0.00118	-0.01284
165	0.01423	0.000604623	-0.01473											165	0.02189	-0.0236		165	0.02691	-0.01581		165	0.02624	-0.00202	-0.01325
165.5	0.01413	0.00103	-0.0152											165.5	0.02251	-0.02343		165.5	0.02699	-0.01653		165.5	0.02672	-0.00141	-0.01294
														166	0.02196	-0.02385		166	0.02672	-0.01617		166	0.0269	-0.00196	-0.01321
														166.5	0.02214	-0.02369		166.5	0.02752	-0.01725		166.5	0.02636	-0.00121	-0.01304
														167	0.02232	-0.02411		167	0.02652	-0.01618		167	0.02785	-0.00191	-0.01316
														167.5	0.0222	-0.02379		167.5	0.02768	-0.01582		167.5	0.02672	-0.00159	-0.01329
														168	0.02253	-0.02436		168	0.02704	-0.01618		168	0.02691	-0.00141	-0.01326
														168.5	0.02256	-0.02405		168.5	0.02748	-0.01618		168.5	0.02709	-0.00211	-0.01339
														169	0.02274	-0.02462		169	0.02792	-0.01654		169	0.02669	-0.00135	-0.01337
														169.5	0.02262	-0.02445		169.5	0.02692	-0.01654		169.5	0.0276	-0.00235	-0.01364
														170	0.02295	-0.02473		170	0.02772	-0.01762		170	0.02735	-0.00129	-0.01347
														170.5	0.02283	-0.025		170.5	0.02708	-0.0169		170.5	0.02695	-0.00185	-0.01388
														171	0.02331	-0.02483		171	0.02717	-0.01726		171	0.02772	-0.00167	-0.01371
														171.5	0.02304	-0.02526		171.5	0.02761	-0.01726		171.5	0.02732	-0.00135	-0.01413
														172	0.02366	-0.02494		172	0.02733	-0.0169		172	0.02823	-0.0022	-0.01396
														172.5	0.02325	-0.02551		172.5	0.02777	-0.01691		172.5	0.02812	-0.00173	-0.01423
														173	0.02373	-0.02505		173	0.02749	-0.01727		173	0.02728	-0.00243	-0.01435
														173.5	0.02332	-0.02562		173.5	0.02757	-0.01619		173.5	0.02893	-0.00153	-0.01433
														174	0.02394	-0.02531		174	0.02801	-0.01763		174	0.02765	-0.00238	-0.0146
														174.5	0.02338	-0.02573		174.5	0.02737	-0.01691		174.5	0.029	-0.00162	-0.01429
														175	0.02415	-0.02527		175	0.02817	-0.01871		175	0.0286	-0.00188	-0.0147
														175.5	0.02389	-0.02569		175.5	0.02789	-0.01763		175.5	0.0282	-0.00214	-0.01424
														176	0.02407	-0.02552		176	0.02834	-0.01943		176	0.02955	-0.00153	-0.0148
														176.5	0.0241	-0.02594		176.5	0.02734	-0.01871		176.5	0.02798	-0.00252	-0.01449
														177	0.02413	-0.02578		177	0.02814	-0.01799		177	0.0289	-0.00133	-0.0149
														177.5	0.02431	-0.02635		177.5	0.02858	-0.01871		177.5	0.02908	-0.00232	-0.01459
														178	0.02434	-0.02618		178	0.02794	-0.01764		178	0.02853	-0.00141	-0.01515
														178.5	0.02452	-0.02631		178.5	0.02838	-0.01836		178.5	0.02959	-0.00168	-0.01469
														179	0.02455	-0.02643		179	0.02702	-0.018		179	0.02846	-0.00194	-0.01525
														179.5	0.02473	-0.02627		179.5	0.02854	-0.01836		179.5	0.02996	-0.00162	-0.01494
														180	0.02462	-0.02684		180	0.0279	-0.01872		180	0.02912	-0.00247	-0.01535

## Sheet: WL C. thermalis
WL C. thermalis
Replicate 1					Replicate 2					Replicate 3
	Acceptors	DCMU	DCMU+Histidine			Acceptors	DCMU	DCMU+Histidine			Acceptors	DCMU	DCMU+Histidine
0	-0.000622264	-0.000311065	-0.000179262		0	-5.86202e-05	-1.17743e-06	-9.53729e-05		0	-0.000317409	-0.000146324	-0.000197406
0.5	-0.000120998	-0.000251446	0.0003835		0.5	0.000223996	-0.000184284	-0.00027314		0.5	-0.000196061	-0.000205268	-4.79551e-05
1	-0.000523731	-0.000370828	-0.000123738		1	-0.000137388	0.000115609	-0.000289907		1	-0.000111213	-0.000373713	-8.10043e-05
1.5	-0.000323464	-0.000132209	0.000261024		1.5	0.000306227	-0.000389497	-0.000145674		1.5	-6.28652e-05	-0.000104158	-0.000114053
2	-0.000425198	-0.00042959	-6.82134e-05		2	-5.51567e-05	7.13964e-05	-0.000162441		2	-1.45173e-05	-0.000163102	3.53973e-05
2.5	-0.000224931	-0.000191972	0.000137549		2.5	0.000387459	-0.00011171	-0.000179208		2.5	-2.66943e-06	-0.000331547	2.3481e-06
3	-0.000477664	-0.000489353	0.000165311		3	-0.000133925	2.71833e-05	0.000126025		3	-0.000173322	-0.000134991	-3.07011e-05
3.5	-0.000277398	-7.27345e-05	0.000193073		3.5	0.000308691	-0.000477923	-5.17425e-05		3.5	-0.000234474	-0.000157436	-6.37503e-05
4	-0.000530131	-0.000191116	0.000399835		4	-5.16933e-05	0.00014397	0.00025349		4	-0.000186126	-0.000325881	4.92005e-05
4.5	-0.000178864	-0.000131497	7.05971e-05		4.5	0.000229923	-0.000361136	-8.52767e-05		4.5	-0.000137778	-0.000129325	-0.000129849
5	-0.000431598	-7.18787e-05	0.000276359		5	-0.000130462	9.97571e-05	5.89562e-05		5	-0.00016243	-0.00015177	-0.000199398
5.5	-0.000231331	-1.22601e-05	-5.28787e-05		5.5	0.000312154	-0.000405349	4.21891e-05		5.5	-0.000187082	-0.000283714	-0.000195947
6	-0.000333064	-0.000131641	0.000331883		6	-4.82298e-05	5.5544e-05	2.5422e-05		6	-6.57341e-05	-0.000196659	-9.99632e-06
6.5	-0.000283798	-0.000251023	-0.000176354		6.5	0.000233386	-0.000288563	0.000169655		6.5	1.91138e-05	-1.03542e-07	-7.95455e-05
7	-0.000384531	-1.24043e-05	0.000209408		7	3.30019e-05	0.000172331	-8.11214e-06		7	3.09617e-05	-0.000168548	-0.000112595
7.5	-0.000185264	-0.000309786	5.81697e-05		7.5	-6.38224e-06	-0.000171776	0.000136121		7.5	0.00015231	-8.14927e-05	3.56071e-07
8	-0.000436998	0.000106833	0.000264932		8	0.000115234	0.000128118	-0.000202646		8	0.000164157	5.56267e-06	3.80687e-06
8.5	-0.000236731	-0.000369548	-0.000243306		8.5	7.58495e-05	-5.49888e-05	0.000263587		8.5	-6.49462e-06	-0.000308882	-6.57423e-05
9	-0.000187464	4.70701e-05	0.000141456		9	0.000197465	8.39047e-05	-0.00023618		9	-0.000140647	-0.000294827	-2.57915e-05
9.5	-0.000289198	-0.000250311	-9.78183e-06		9.5	-2.91879e-06	6.17981e-05	0.000230052		9.5	-9.22988e-05	-0.000171271	8.71593e-05
10	-0.000239931	-1.16927e-05	0.00019698		10	0.000279697	3.96916e-05	-0.000269715		10	-0.000153451	-0.000449216	-0.00016489
10.5	-0.000341664	-0.000131074	-0.000132258		10.5	-8.16871e-05	0.000178585	0.000196518		10.5	-0.000105103	-0.00036216	-0.000124939
11	-0.000141398	0.000107545	7.35045e-05		11	3.99288e-05	-4.52153e-06	-0.000142249		11	-0.000129755	-0.000202105	-0.000230988
11.5	-0.000394131	-0.000189837	-7.67334e-05		11.5	0.000161545	0.000295372	0.000323984		11.5	-8.40722e-06	-0.00037055	2.79624e-05
12	-4.28642e-05	4.77818e-05	-4.89713e-05		12	0.000122161	-0.000209735	-0.000175783		12	3.44068e-06	-0.000246994	-4.15868e-05
12.5	-0.000144598	-0.0002496	-2.12092e-05		12.5	0.000243776	9.01588e-05	0.00029045		12.5	1.52886e-05	-5.04387e-05	-3.8136e-05
13	-9.53309e-05	0.000167019	-0.000172447		13	0.000204392	-9.29477e-05	-4.83172e-05		13	0.000100136	-0.000218883	7.48148e-05
13.5	-0.000347064	-0.000309362	3.4315e-05		13.5	4.0081e-06	0.000206946	9.59157e-05		13.5	0.000148484	-0.000204828	0.000333766
14	3.20245e-06	0.000286256	-0.000116923		14	0.000125624	-0.000137161	-8.18514e-05		14	-2.21677e-05	-4.47725e-05	0.000337216
14.5	-0.000248531	-0.000190125	0.000267839		14.5	-7.47602e-05	0.000323733	6.23815e-05		14.5	-0.00015632	-0.000176717	0.000340667
15	-4.92642e-05	0.000227493	-6.13987e-05		15	4.68557e-05	-2.03739e-05	4.56144e-05		15	-3.49719e-05	-0.000272162	-0.00101
15.5	-0.000300998	-0.000248888	0.000323363		15.5	7.47154e-06	0.00043952	-0.000132153		15.5	-9.6124e-05	-0.000185106	-0.000863681
16	4.92691e-05	0.000167731	-0.000184874		16	0.000290087	-6.4587e-05	1.20803e-05		16	2.52239e-05	-0.000317051	-0.00086023
16.5	-0.000353464	-0.000308651	0.000378888		16.5	-7.12967e-05	0.000235306	-0.000165687		16.5	3.70718e-05	-0.000594995	-0.00082028
17	-0.000153198	0.000286968	-0.00012935		17	0.000211319	-0.0001088	0.000300546		17	0.00015842	-0.00036194	-0.000488079
17.5	-0.000254931	-1.04136e-05	7.74119e-05		17.5	1.0935e-05	0.000191093	-0.000199221		17.5	0.000133768	-0.000457385	-0.000557878
18	-0.000205664	4.9205e-05	-7.3826e-05		18	0.000293551	7.98676e-06	0.000267012		18	0.000182115	-0.000589329	-0.000481427
18.5	0.000145603	-7.01764e-05	0.000132936		18.5	-6.78333e-05	-1.41198e-05	-7.17552e-05		18.5	0.000230463	-0.000319774	-0.000368476
19	-0.000258131	-1.05578e-05	0.000160698		19	0.000214783	-3.62263e-05	0.000233478		19	0.000278811	-0.000305718	-0.000365026
19.5	-5.78641e-05	-0.000307939	0.00018846		19.5	-0.000146602	-5.83329e-05	5.57106e-05		19.5	0.000108159	-0.000364663	-0.000471075
20	-0.000310597	0.000108679	-0.000319778		20	0.000136014	8.05606e-05	0.000199944		20	1.05071e-05	-0.000131608	-0.000394624
20.5	4.06692e-05	-0.000188702	0.000243985		20.5	-0.00022537	-0.000102546	0.000183176		20.5	5.8855e-05	2.84478e-05	-0.000244923
21	-0.000212064	0.000227917	-8.52534e-05		21	0.000218246	0.000196347	5.40937e-06		21	0.000143703	-6.69968e-05	-0.000350972
21.5	-1.17975e-05	-6.94647e-05	0.000120509		21.5	-0.000143138	-0.000146759	-0.000172358		21.5	0.000192051	2.00586e-05	-0.000347522
22	-0.000113531	0.000347154	-2.97291e-05		22	0.000300478	0.000313134	0.000132875		22	0.000240399	0.000253114	-0.000271071
22.5	8.67359e-05	-0.000129228	-1.96704e-06		22.5	-6.09064e-05	-2.99722e-05	-0.000205892		22.5	0.000325247	0.000121169	-1.212e-05
23	-0.000164997	0.000287391	2.57951e-05		23	0.000382709	0.000107921	0.000260341		23	0.000191094	0.000135225	-8.66921e-06
23.5	0.000185269	-0.00018899	-0.000125443		23.5	-0.000300675	-7.41853e-05	-0.000239426		23.5	0.000166442	0.00040478	3.12816e-05
24	-6.64641e-05	4.96283e-05	0.000259319		24	0.000142941	0.000224708	0.000226807		24	0.00010529	0.000126836	0.000107982
24.5	-1.71974e-05	-0.000247753	-6.99186e-05		24.5	-0.000218443	-0.000118398	-0.00011196		24.5	0.000226638	-5.10901e-06	7.49332e-05
25	3.20693e-05	0.000168865	0.000136843		25	6.41729e-05	1.94951e-05	0.000193273		25	5.59861e-05	0.000191446	-0.000104366
25.5	8.13359e-05	-0.000128516	-0.000193394		25.5	-0.000297211	-0.000162611	-0.000145494		25.5	0.000104334	2.30018e-05	8.58477e-06
26	-2.03974e-05	-6.88973e-05	0.000192368		26	-1.45954e-05	0.000136282	0.000159738		26	0.000189182	-7.24428e-05	8.50356e-05
26.5	2.88693e-05	-9.27869e-06	-0.00013787		26.5	-0.00021498	-0.000206825	-1.80286e-05		26.5	0.00027403	0.000306613	-5.75136e-05
27	-7.28641e-05	5.03399e-05	6.88919e-05		27	6.76364e-05	0.000253069	0.000126204		27	0.000285878	6.5168e-05	-0.000163563
27.5	-2.35974e-05	-0.000247041	-8.2346e-05		27.5	-0.000293748	-9.10377e-05	-5.15628e-05		27.5	0.000334226	6.22342e-06	-0.000233112
28	2.56693e-05	-9.42288e-06	-5.45839e-05		28	-1.11319e-05	0.000208856	9.26701e-05		28	0.000455574	0.000275779	-4.71612e-05
28.5	-7.6064e-05	-0.000127804	-2.68218e-05		28.5	0.000271484	2.57492e-05	-8.5097e-05		28.5	0.000284921	-2.16578e-06	-0.00011671
29	-2.67974e-05	-6.81857e-05	9.40354e-07		29	-8.99002e-05	0.000164643	0.000220136		29	0.000296769	-9.76104e-05	-4.02596e-05
29.5	-0.000127531	-0.000187567	-0.000149298		29.5	0.000192716	0.000142536	4.23689e-05		29.5	0.000345117	9.8945e-05	0.000109441
30	7.1736e-05	-0.000127948	0.000235465		30	-0.000168668	0.00028143	0.000186602		30	0.000320465	-0.0001425	0.000185892
30.5	-0.000179997	-0.00024733	-9.37733e-05		30.5	-4.70526e-05	0.000259323	8.83468e-06		30.5	0.000259313	-0.000201444	0.000116093
31	2.02693e-05	-8.71125e-06	0.000111989		31	7.45632e-05	0.000237216	0.000153068		31	0.000198161	0.000141111	0.000229044
31.5	-8.1464e-05	-0.000128093	0.000139751		31.5	3.51791e-05	0.00037611	-0.0001857		31.5	0.000319509	-2.73334e-05	0.000305494
32	0.000118803	-6.8474e-05	-1.0487e-05		32	-0.000165205	0.000193003	0.000280533		32	0.000440857	-0.000159528	0.000162945
32.5	-0.000133931	-8.85543e-06	0.000195275		32.5	0.000117411	0.000170897	-5.82337e-05		32.5	0.000489205	3.70275e-05	9.33959e-05
33	6.6336e-05	5.07632e-05	-0.000133963		33	-8.29733e-05	0.00030979	0.000246999		33	0.000537553	-0.000167917	0.000170097
33.5	-0.000186397	-6.76182e-05	0.000250799		33.5	3.86426e-05	0.000287684	-9.17679e-05		33.5	0.0004764	-0.000299862	0.000392548
34	0.000164869	-0.000187	-0.000256439		34	-0.000161742	0.000265577	0.000213465		34	0.000342248	7.94437e-05	0.000359498
34.5	-8.7864e-05	0.000408619	0.000128324		34.5	0.000281874	0.000404471	-0.000125302		34.5	0.000171596	-5.25009e-05	0.000910699
35	0.000112403	-6.77624e-05	-0.000200914		35	-0.00024051	0.000221364	0.000179931		35	0.000292944	-0.000147946	0.00098715
35.5	-0.000140331	0.000348856	4.84775e-06		35.5	0.000203106	0.000360258	-0.000158836		35.5	0.000304792	1.21099e-05	0.000954101
36	5.99361e-05	-0.000127525	-0.00014539		36	-0.000319278	1.6151e-05	0.000146397		36	0.00024364	-0.000119835	0.000738302
36.5	-0.000191797	0.000290093	0.000239372		36.5	0.000285338	0.000316044	-3.13704e-05		36.5	0.000255488	-0.000325029	0.000194002
37	7.4694e-06	-0.000186288	0.000267134		37	-0.000237046	-2.80621e-05	0.000112863		37	0.000340336	-0.000164974	0.000160953
37.5	-9.32639e-05	0.000230331	0.000115896		37.5	0.000206569	0.000271831	9.60954e-05		37.5	9.66836e-05	-0.000223919	-1.80961e-05
38	-4.39973e-05	-0.000246051	0.000322658		38	-0.000315815	-0.000233275	7.93283e-05		38	-9.68485e-07	-0.000355863	-0.000160645
38.5	5.26942e-06	0.000170568	-6.57961e-06		38.5	0.000127801	6.66182e-05	6.25613e-05		38.5	8.38794e-05	-0.000232058	-0.000120694
39	-0.000247464	-0.000126814	0.000556183		39	-0.000233583	-0.000116488	4.57942e-05		39	0.000132227	-0.000181502	2.87563e-05
39.5	0.000103803	0.000111805	0.000405945		39.5	0.000210033	2.24051e-05	-0.000131973		39.5	0.000180575	-0.000350197	-4.07929e-05
40	-0.000148931	-0.000186576	0.000433707		40	-0.000151351	0.000161299	-0.00014874		40	0.000192423	-0.000153641	-8.42108e-07
40.5	5.13361e-05	0.000409042	0.000104469		40.5	0.000131265	-2.1808e-05	-0.000165507		40.5	0.000240771	6.41391e-06	0.000112359
41	-0.000201397	-6.73391e-05	0.000132231		41	-0.00023012	0.000278085	-2.12742e-05		41	0.000106619	-0.000198781	0.000152309
41.5	-1.13054e-06	-7.72054e-06	0.000159993		41.5	0.000213496	-0.000227021	-0.000199041		41.5	4.54668e-05	3.45247e-05	9.51028e-06
42	-0.000252864	-0.000126102	0.000544755		42	-0.000308888	7.28724e-05	-5.48084e-05		42	0.000130315	-9.74199e-05	8.59611e-05
42.5	9.74028e-05	0.000111517	0.000215517		42.5	0.000134728	-0.000110234	-0.000393575		42.5	0.000105663	-0.000302614	0.000162412
43	-0.000305331	0.000171135	0.000600279		43	-0.000387656	0.000350659	-8.83425e-05		43	4.45105e-05	-0.000178809	1.98627e-05
43.5	4.49361e-05	0.000230754	9.20415e-05		43.5	5.59598e-05	-0.000154447	-0.00026611		43.5	-1.68916e-05	-0.000128254	-0.000122687
44	-0.000206797	0.000112372	0.000119804		44	-0.000305424	0.000306446	3.81233e-05		44	-5.04368e-06	-0.000296948	-9.48573e-06
44.5	0.000143469	-7.00892e-06	0.000147566		44.5	0.000138192	-0.00019866	-0.000299644		44.5	-6.61958e-05	-0.000100143	0.000103465
45	-0.000108264	0.00023161	0.000175328		45	-0.000223193	0.000262233	-0.000155411		45	-0.000237098	-0.000122587	0.000106916
45.5	9.20028e-05	-6.57717e-05	0.00020309		45.5	5.94232e-05	-0.000242873	-0.000172178		45.5	3.05e-05	-0.000291032	0.000146867
46	-9.73049e-06	0.000171847	0.000587852		46	-0.000301961	0.00021802	-0.000188945		46	-0.000140402	-9.42266e-05	0.000296317
46.5	0.000190536	-0.000125534	0.000437614		46.5	-1.9345e-05	-0.000126087	-0.000205712		46.5	-0.000201554	-7.17124e-06	0.000153768
47	-6.21971e-05	0.000470084	0.000286376		47	-0.000219729	0.000173807	-0.000222479		47	-6.95627e-06	-0.000102866	-2.55309e-05
47.5	-1.29305e-05	-0.000185297	0.000493138		47.5	-9.81133e-05	-9.2997e-06	-0.000239246		47.5	-6.81084e-05	0.00020319	5.09199e-05
48	3.63362e-05	0.000410321	0.0001629		48	-0.000298497	0.000129594	-0.000256013		48	-9.27605e-05	0.000217245	5.43706e-05
48.5	-0.000216397	-6.60601e-05	0.000369663		48.5	-0.000176882	0.000107487	-0.000112781		48.5	2.85874e-05	-0.00013395	9.43214e-05
49	-1.61305e-05	0.000351559	-0.000138575		49	-0.000377266	-7.56193e-05	-0.000450548		49	4.04353e-05	6.28558e-05	-4.82278e-05
49.5	-0.000117864	5.31771e-05	0.000246187		49.5	-0.00025565	0.000224274	-0.000146315		49.5	5.22832e-05	-0.000215089	6.4723e-05
50	8.24029e-05	0.000291796	9.59489e-05		50	-0.000456034	-0.000119832	-0.000323082		50	-8.86887e-06	-0.000347283	0.000141174
50.5	0.00013167	-5.58566e-06	0.000301711		50.5	-1.24182e-05	0.000180061	-0.000179849		50.5	3.9479e-05	-0.000223728	7.16246e-05
51	2.99362e-05	5.40329e-05	-0.000206527		51	-0.000373802	-0.000325046	-0.000196616		51	1.48269e-05	-0.000173173	7.50754e-05
51.5	7.92029e-05	-6.53484e-05	0.000179235		51.5	-9.11864e-05	0.000135848	-0.000373383		51.5	-9.82517e-06	-0.000268867	0.000115276
52	0.00012847	0.00035127	2.79973e-05		52	-0.000452571	-0.000208259	-0.00023015		52	3.85227e-05	-0.000254812	0.000118727
52.5	-0.000123264	-0.000125111	0.000234759		52.5	-0.000169955	9.16348e-05	-0.000246917		52.5	0.000123371	-2.15064e-05	-6.05722e-05
53	7.70029e-05	0.000292507	-0.000273478		53	-0.000531339	-0.000252472	-0.000263684		53	2.57185e-05	-0.000226701	1.58786e-05
53.5	-0.00017573	-0.000183874	0.000111284		53.5	-0.000409723	0.000208422	4.15486e-05		53.5	-0.000108684	-0.000212646	5.58294e-05
54	2.45363e-05	0.000232745	-0.000217954		54	-0.000449107	-0.000296685	-0.000457219		54	1.29143e-05	5.71598e-05	-8.67198e-05
54.5	-7.71971e-05	-6.46368e-05	-1.21922e-05		54.5	-0.000327491	0.000325209	8.0144e-06		54.5	-8.47378e-05	-0.000221035	-0.000229269
55	0.00012307	0.000351982	-0.00016243		55	-0.000366875	-0.000179898	-0.000330753		55	-0.00010964	-0.000279979	-0.000116318
55.5	-0.000129664	-0.0001244	-0.000134668		55.5	-0.00056726	0.000119996	-2.55198e-05		55.5	-0.000207292	-1.0174e-05	-3.36739e-06
56	-8.0397e-05	0.000114219	7.10942e-05		56	-0.000445644	-0.000224111	-0.000364287		56	-4.94441e-05	-0.000215369	3.65834e-05
56.5	-0.00018113	-0.000183162	-7.91437e-05		56.5	-0.000646028	7.57824e-05	-5.9054e-05		56.5	-7.40962e-05	-0.000201313	7.65342e-05
57	1.81363e-05	0.000233456	0.000305618		57	-0.000363412	-0.000268324	-0.000397821		57	1.10017e-05	-7.77578e-05	0.000153235
57.5	-8.2597e-05	-6.39252e-05	-2.36195e-05		57.5	-0.000563796	-0.000129431	-9.25881e-05		57.5	5.93496e-05	-0.000173202	0.000156686
58	-3.33303e-05	0.000352693	0.000182143		58	-0.00044218	-0.000151537	-0.000591355		58	-1.80246e-06	-0.000268647	-9.56134e-05
58.5	1.59363e-05	-0.000123688	-0.000147095		58.5	-0.000642564	-0.000173644	-0.000126122		58.5	-0.000245705	-0.000144842	-1.91626e-05
59	-8.5797e-05	0.000292931	0.000237667		59	-0.000199949	-3.47504e-05	-0.000464889		59	-0.000343607	-2.10361e-05	-5.22118e-05
59.5	-3.65303e-05	-0.000183451	-0.000270571		59.5	-0.000400333	-0.000378857	-0.000159656		59.5	-0.000258759	-0.000153231	-0.000121761
60	-0.000138264	0.000234168	0.000115191		60	-0.000439717	8.20365e-05	-0.000337424		60	-0.000137411	-6.61753e-05	-0.00022781
60.5	-8.8997e-05	-6.42136e-05	-0.000215047		60.5	-0.000318101	-0.00042307	0.000128809		60.5	2.0437e-05	5.73801e-05	-0.000114859
61	-0.00019073	0.000353405	0.000170715		61	-0.000357485	3.78234e-05	-0.000370958		61	0.000105535	3.49355e-05	7.10914e-05
61.5	9.53637e-06	5.50237e-05	-0.000337523		61.5	-0.000396869	-0.000145283	9.52752e-05		61.5	0.000263633	4.89909e-05	7.45422e-05
62	-0.000242197	0.000472642	4.72394e-05		62	-0.000275253	-0.00016739	-0.000404492		62	5.62307e-05	0.000355296	0.000114493
62.5	-4.29303e-05	0.000174261	-0.000103998		62.5	-0.000314637	-2.84962e-05	6.1741e-05		62.5	3.15786e-05	0.000150102	0.000227694
63	6.33639e-06	0.000412879	0.000102764		63	-3.20216e-05	0.000110397	-0.000116026		63	4.34265e-05	9.09071e-05	0.000340645
63.5	0.000206603	0.000293498	0.000130526		63.5	-0.000232406	-7.27093e-05	0.000189207		63.5	0.000237774	0.000360712	0.000161345
64	0.00010487	0.000711117	-2.07121e-05		64	0.00021121	6.61841e-05	-0.00031056		64	0.000213122	0.000228768	0.000274296
64.5	0.000305136	0.000591735	0.00018605		64.5	-0.000150174	-0.000116922	-5.32738e-06		64.5	0.00022497	0.000169823	0.000314247
65	0.000354403	0.000830354	3.48121e-05		65	0.000293442	2.1971e-05	-0.000183094		65	0.000346318	0.000330129	0.000135198
65.5	0.00040367	0.000710972	0.000420574		65.5	-6.79423e-05	-0.000161136	-0.000199862		65.5	0.000248666	0.000161434	-4.38514e-05
66	0.000603936	0.000770591	9.03363e-05		66	0.000375674	0.000138758	-5.56286e-05		66	0.000297014	2.92395e-05	-3.90065e-06
66.5	0.000804203	0.00083021	0.000654098		66.5	1.42894e-05	-0.000205349	-0.000233396		66.5	0.000382112	0.000226045	0.00010905
67	0.00070247	0.000889828	0.000145861		67	0.000457905	9.45448e-05	7.18372e-05		67	0.00039396	0.0002036	7.60009e-05
67.5	0.00105	0.000949447	0.000531623		67.5	0.000257521	-0.000410562	-0.00042793		67.5	0.000259808	7.16557e-05	0.000115952
68	0.0011	0.000830066	0.000201385		68	0.000379137	5.03317e-05	3.8303e-05		68	0.000271656	0.000195461	0.000229153
68.5	0.00145	0.00107	0.000587147		68.5	0.000339753	-0.000293775	-0.000461464		68.5	0.000429503	0.000209517	0.000159603
69	0.0015	0.000771303	7.89089e-05		69	0.000300369	6.11865e-06	0.000165769		69	0.000404851	-6.86781e-05	-1.96959e-05
69.5	0.0017	0.00101	0.000820671		69.5	0.000421985	-0.000337988	-0.000494998		69.5	0.000453199	0.000128127	0.000129755
70	0.00175	0.00089054	0.000134433		70	0.0007046	-0.000199094	0.000132235		70	0.000684297	0.000178683	0.000133206
70.5	0.00195	0.00113	0.000876195		70.5	0.000343216	-0.000382201	-0.000206532		70.5	0.000769145	4.64881e-05	0.000136657
71	0.00215	0.000830777	0.000367957		71	0.000625832	-0.000404308	-6.22995e-05		71	0.000817493	0.000133544	3.06073e-05
71.5	0.0022	0.00125	0.000753719		71.5	0.000586448	-0.000426414	-0.000240067		71.5	0.00105	0.000220599	0.000143808
72	0.0024	0.000950014	0.000602482		72	0.000708064	-0.000126521	-0.000256834		72	0.0011	1.54043e-05	0.000366259
72.5	0.00245	0.00137	0.000809244		72.5	0.00050768	-0.000309627	-0.000273601		72.5	0.000962537	0.00010246	0.00036971
73	0.00265	0.000890252	0.000658006		73	0.000790296	-0.000331734	0.000192632		73	0.0013	0.000335765	0.000409661
73.5	0.0027	0.00131	0.000685768		73.5	0.000589911	-0.00035384	-0.000307135		73.5	0.00153	0.000203571	0.000559111
74	0.0029	0.00101	0.00089253		74	0.000711527	-0.000375947	0.000320098		74	0.00169	0.000254126	0.000599062
74.5	0.00295	0.00143	0.000384292		74.5	0.000833143	-0.000398053	-0.000179669		74.5	0.00181	0.000596931	0.000419763
75	0.00315	0.00113	0.00113		75	0.000632759	-0.00042016	0.000125564		75	0.00182	0.000355237	0.000532714
75.5	0.0032	0.00155	0.000439816		75.5	0.000915375	-0.000281267	-0.000213203		75.5	0.00165	0.000369292	0.000536164
76	0.0034	0.00125	0.001		76	0.000553991	-0.000464373	9.20296e-05		76	0.00152	0.000602598	0.000393615
76.5	0.00345	0.00149	0.000673341		76.5	0.00116	-3.47961e-06	-0.000246738		76.5	0.00164	0.000287903	0.000251066
77	0.0038	0.00119	0.00106		77	0.000636223	-0.000508586	0.000219495		77	0.00169	0.000338458	0.000364267
77.5	0.00385	0.00161	0.000550865		77.5	0.00108	0.000113307	-0.000119272		77.5	0.0017	0.000644764	0.000477218
78	0.00405	0.00131	0.00111		78	0.000557454	-0.000230799	0.000185961		78	0.00182	0.000476069	0.000407668
78.5	0.0041	0.00173	0.000784389		78.5	0.001	0.000230094	8.19413e-06		78.5	0.00194	0.000453625	0.000374619
79	0.0043	0.00143	0.00117		79	0.000639686	-0.000275012	0.000313427		79	0.00174	0.00068693	0.00045107
79.5	0.00435	0.00184	0.000661913		79.5	0.00108	0.000185881	-2.534e-05		79.5	0.00164	0.000445235	0.000418021
80	0.00455	0.00137	0.00123		80	0.000560918	-0.000158225	0.000118893		80	0.00176	0.000349791	0.000238722
80.5	0.0046	0.00178	0.000717437		80.5	0.001	0.000141668	-0.000219874		80.5	0.00185	0.000436846	0.000351672
81	0.0048	0.00167	0.00128		81	0.000804149	-0.000202439	0.000246359		81	0.00193	0.000341152	0.000355123
81.5	0.005	0.0019	0.000772962		81.5	0.00125	0.000258455	-9.24084e-05		81.5	0.00205	0.000136207	0.000249074
82	0.00505	0.00161	0.000800724		82	0.000886381	-0.000246652	0.000212825		82	0.0021	0.000296262	0.000106525
82.5	0.00509	0.00202	0.000828486		82.5	0.00149	0.000214242	-0.000125943		82.5	0.00211	0.000273818	0.000256226
83	0.00529	0.0019	0.000677248		83	0.000968613	-0.000129865	0.00017929		83	0.00205	0.000105373	0.000369176
83.5	0.00565	0.00196	0.00088401		83.5	0.00141	0.000170029	0.000162523		83.5	0.00221	0.000192429	0.000372627
84	0.00554	0.00184	0.000732772		84	0.00121	-1.30779e-05	0.000145756		84	0.00218	0.000243234	0.000376078
84.5	0.00574	0.0019	0.00112		84.5	0.00149	0.000125816	0.000128989		84.5	0.00209	0.000147789	0.000525529
85	0.00579	0.00214	0.000610296		85	0.00129	0.000103709	0.000273222		85	0.00203	0.000234845	0.00049248
85.5	0.00599	0.00184	0.00117		85.5	0.00158	-7.93975e-05	0.000256455		85.5	0.00218	0.00043165	0.00034968
86	0.00589	0.00226	0.000843821		86	0.00154	5.94959e-05	7.86878e-05		86	0.00212	0.000408956	0.000462631
86.5	0.00624	0.00179	0.00123		86.5	0.00166	-0.000123611	0.000222921		86.5	0.00213	0.000350011	0.000575582
87	0.00614	0.00238	0.000899345		87	0.00162	0.000176283	4.51536e-05		87	0.0024	0.000692816	0.000469533
87.5	0.00634	0.00208	0.00111		87.5	0.00158	-0.000167824	0.000189387		87.5	0.00249	0.000633622	0.000326984
88	0.00639	0.00232	0.000776869		88	0.0017	0.00029307	-0.000149381		88	0.00253	0.000501677	0.000476684
88.5	0.00659	0.00185	0.00134		88.5	0.00166	-0.000212037	0.000155852		88.5	0.00255	0.000807983	0.000443635
89	0.00649	0.00226	0.00101		89	0.00194	0.000248857	-2.19147e-05		89	0.00263	0.000566288	0.000520086
89.5	0.00699	0.00196	0.00104		89.5	0.00158	-9.52499e-05	0.000122318		89.5	0.00253	0.000434343	0.000487037
90	0.00689	0.00238	0.00107		90	0.0017	0.000204644	-5.54489e-05		90	0.00247	0.000594399	0.000636488
90.5	0.00694	0.00173	0.00091568		90.5	0.00199	-0.000139463	0.000249784		90.5	0.00252	0.000462204	0.000603438
91	0.00714	0.0025	0.00112		91	0.00195	0.00016043	-0.000249983		91	0.00253	0.00025726	0.000387639
91.5	0.00719	0.00185	0.000792204		91.5	0.00191	-0.000344676	0.00021625		91.5	0.00243	0.000417315	0.00046409
92	0.00739	0.00244	0.000998966		92	0.00203	0.000277217	-0.000283517		92	0.00241	0.000358371	0.000504041
92.5	0.00759	0.00214	0.000668728		92.5	0.00199	-0.000227889	0.000182716		92.5	0.00246	0.000189926	0.000361492
93	0.00764	0.00238	0.00105		93	0.00227	0.000233004	-0.000317051		93	0.00265	0.000313481	0.000218942
93.5	0.00769	0.00244	0.000724252		93.5	0.00191	-0.000272102	0.000149181		93.5	0.00263	0.000327537	0.000368643
94	0.00789	0.00232	0.00111		94	0.00219	0.000188791	-0.000189586		94	0.00275	0.000195592	0.000408594
94.5	0.00778	0.00202	0.000779776		94.5	0.00199	-0.000155315	0.000276647		94.5	0.00287	0.000282648	0.000412045
95	0.00814	0.00226	0.000986539		95	0.00228	-1.6422e-05	-6.21198e-05		95	0.00274	0.000406203	0.000342496
95.5	0.00803	0.00197	0.00101		95.5	0.00192	0.000122471	8.21131e-05		95.5	0.00271	0.000310758	0.000418946
96	0.00823	0.0022	0.000863063		96	0.00236	-6.06351e-05	-9.5654e-05		96	0.00283	0.000288314	0.000239897
96.5	0.00813	0.00191	0.00125		96.5	0.002	7.82584e-05	4.85789e-05		96.5	0.00285	0.000484869	6.0598e-05
97	0.00833	0.00214	0.0011		97	0.00228	-0.000104848	3.18118e-05		97	0.00278	0.000316425	0.000100549
97.5	0.00838	0.0022	0.00113		97.5	0.00192	0.000195045	1.50448e-05		97.5	0.00269	0.00022098	0.0002135
98	0.00843	0.00226	0.000617111		98	0.00236	1.19387e-05	-1.72234e-06		98	0.00277	0.000308035	0.00021695
98.5	0.00863	0.00214	0.001		98.5	0.002	0.000150832	-0.000179489		98.5	0.00282	0.000176091	1.40117e-06
99	0.00868	0.00238	0.000493635		99	0.00244	0.000128726	0.000125743		99	0.00269	7.64615e-06	0.000187352
99.5	0.00858	0.00226	0.00106		99.5	0.00224	0.000267619	-0.000213024		99.5	0.00288	0.000167702	0.000154303
100	0.00893	0.0025	0.00072816		100	0.00253	-7.64875e-05	-0.000229791		100	0.00296	0.000108757	0.000121254
100.5	0.00883	0.0022	0.000934922		100.5	0.002	6.2406e-05	-8.55578e-05		100.5	0.00283	-5.96876e-05	0.000161204
101	0.00903	0.00244	0.000426684		101	0.00245	0.000201299	-0.000102325		101	0.00281	0.000100368	0.000274405
101.5	0.00893	0.00215	0.000632446		101.5	0.00209	0.000179193	-0.000119092		101.5	0.00296	0.000150923	0.000277856
102	0.00913	0.00256	0.000660208		102	0.00253	0.000157086	-0.000135859		102	0.0029	5.54786e-05	9.85568e-05
102.5	0.00918	0.00226	0.00050997		102.5	0.00201	0.00013498	-0.000313626		102.5	0.00306	0.000142534	0.000175008
103	0.00922	0.00215	0.000715732		103	0.00245	-4.81268e-05	-8.39323e-06		103	0.00318	0.000302589	0.000251458
103.5	0.00927	0.0022	0.000743494		103.5	0.00209	0.000250767	-0.00034716		103.5	0.00327	0.000243645	0.000108909
104	0.00963	0.00226	0.00113		104	0.00237	-9.23399e-05	0.000119073		104	0.00306	0.0002577	-3.36401e-05
104.5	0.00952	0.0025	0.000621019		104.5	0.00217	0.000206554	-0.000380694		104.5	0.00289	0.000527256	7.93107e-05
105	0.00987	0.00238	0.00101		105	0.00229	-0.000136553	8.55384e-05		105	0.00297	0.000395311	8.27615e-05
105.5	0.00977	0.00244	0.000318543		105.5	0.00242	0.00016234	-0.000414229		105.5	0.00309	0.000226866	1.29623e-05
106	0.00997	0.00232	0.000882305		106	0.00238	-0.000341766	5.20042e-05		106	0.00325	0.000350422	-5.65869e-05
106.5	0.00987	0.00292	0.000374067		106.5	0.00234	0.000118127	-0.000447763		106.5	0.00334	0.000145477	1.98639e-05
107	0.00992	0.00244	0.000759829		107	0.00246	-0.000385979	1.84701e-05		107	0.0035	1.35326e-05	-0.000159435
107.5	0.01012	0.00268	0.000608591		107.5	0.00258	-8.60857e-05	-0.000320297		107.5	0.00336	0.000100588	-0.000374984
108	0.01017	0.00238	0.000993353		108	0.00238	-0.000269192	-1.50641e-05		108	0.0033	0.000187643	-0.000371534
108.5	0.01022	0.00298	0.000485115		108.5	0.0025	-0.000291299	-0.000353831		108.5	0.00353	5.56988e-05	-0.000368083
109	0.01027	0.00232	0.00105		109	0.00262	-0.000313405	-4.85983e-05		109	0.00362	0.000215754	-0.000437632
109.5	0.01047	0.00274	0.00071964		109.5	0.00226	-0.000335512	-0.000387365		109.5	0.00355	0.00033931	-0.000616681
110	0.01037	0.00227	0.0011		110	0.0027	-0.000196618	7.88675e-05		110	0.0036	0.000353365	-0.00046723
110.5	0.01057	0.00286	0.000954164		110.5	0.00234	-0.000218725	-0.0005819		110.5	0.00358	0.00029442	-0.00039053
111	0.01047	0.00221	0.000981926		111	0.00263	-0.000401832	-0.000115667		111	0.00344	0.000381476	-0.000460079
111.5	0.01067	0.0028	0.000830688		111.5	0.00243	-0.000262938	-0.000454434		111.5	0.00338	0.000286031	-0.000456628
112	0.01056	0.00233	0.00085845		112	0.00271	3.59553e-05	-0.000149201		112	0.0035	8.10867e-05	-0.000343677
112.5	0.01076	0.00256	0.00107		112.5	0.00267	-0.000468151	-0.000648968		112.5	0.00344	0.000241142	-0.000449977
113	0.01081	0.00244	0.000734974		113	0.00263	-8.25777e-06	-0.000182735		113	0.00346	0.000291697	-0.000629026
113.5	0.01086	0.0025	0.000941737		113.5	0.00275	-0.000512364	-0.000521502		113.5	0.00339	8.67529e-05	-0.000589075
114	0.01091	0.00256	0.000969499		114	0.00271	-5.24709e-05	-5.52692e-05		114	0.00352	0.000283308	-0.000439374
114.5	0.01111	0.00244	0.000997261		114.5	0.00299	-0.000556577	-0.000394036		114.5	0.00331	0.000406864	-0.000545423
115	0.01101	0.00268	0.000489023		115	0.00263	-9.6684e-05	7.21966e-05		115	0.00325	0.000238419	-0.000505473
115.5	0.01121	0.00256	0.00105		115.5	0.00308	-0.000439791	-0.00026657		115.5	0.0034	0.000325474	-0.000210022
116	0.01126	0.0028	0.000544547		116	0.00288	-0.000140897	-0.000122338		116	0.00356	0.00055853	-0.000414571
116.5	0.01131	0.00251	0.00111		116.5	0.00316	-0.000324004	-0.000300105		116.5	0.00368	0.000390085	-0.00058237
117	0.01121	0.00274	0.000600071		117	0.00264	-0.00034611	0.000166128		117	0.0037	0.000367641	-0.000567669
117.5	0.01141	0.00227	0.000984833		117.5	0.00308	-0.000368217	-0.000172639		117.5	0.00367	0.000564196	-0.000479969
118	0.01146	0.00286	0.000655595		118	0.0024	-0.000390323	0.000132594		118	0.00335	0.000322751	-0.000403518
118.5	0.01151	0.00274	0.000862358		118.5	0.00284	-9.04298e-05	-0.000367173		118.5	0.00322	0.000190807	-0.000327067
119	0.01141	0.0028	0.00053312		119	0.0028	-0.000434536	-6.19401e-05		119	0.00345	0.000350862	-0.000360116
119.5	0.0116	0.00233	0.000738882		119.5	0.00292	2.63571e-05	-0.000239707		119.5	0.00361	0.000255418	-0.000247165
120	0.01165	0.00274	0.000409644		120	0.00272	-0.000317749	6.55257e-05		120	0.00369	1.39731e-05	-0.000389715
120.5	0.0117	0.00227	0.000794406		120.5	0.003	-0.000339856	-0.000273241		120.5	0.00382	0.000174029	-0.000532264
121	0.01175	0.00268	0.000465168		121	0.00264	-0.000361963	3.19916e-05		121	0.00379	0.000224584	-0.000455813
121.5	0.01165	0.00239	0.00067193		121.5	0.00309	-0.000223069	-0.000306776		121.5	0.00366	5.61393e-05	-0.000452362
122	0.01185	0.0028	0.000341692		122	0.00289	-0.000406176	-1.54261e-06		122	0.00345	0.000252695	-0.000594911
122.5	0.0119	0.00215	0.000548454		122.5	0.00317	-0.000106282	-0.00034031		122.5	0.00375	0.00044925	-0.000554961
123	0.01195	0.00257	0.000397217		123	0.00281	-0.000611389	-3.50768e-05		123	0.00373	0.000280806	-0.00047851
123.5	0.012	0.00227	0.000424979		123.5	0.00325	-0.000150495	-0.000373844		123.5	0.00381	0.000294861	-0.000730559
124	0.01205	0.00268	0.000631741		124	0.00289	-0.000655602	-0.000229611		124	0.0039	0.000418416	-0.000836858
124.5	0.0121	0.00239	0.000123503		124.5	0.00317	-0.000355708	-0.000246378		124.5	0.00387	0.000176972	-0.000906407
125	0.01215	0.00245	0.000687265		125	0.00297	-0.000538815	-0.000263145		125	0.00367	8.52715e-06	-0.000683957
125.5	0.0122	0.00251	0.000358027		125.5	0.00325	-0.000399922	-0.000279912		125.5	0.00353	0.000278083	-0.000826506
126	0.01224	0.00257	0.000742789		126	0.00289	-0.000422028	-0.000457679		126	0.00362	0.000109638	-0.000823055
126.5	0.01229	0.00263	0.000413551		126.5	0.00318	-0.000605135	0.000169554		126.5	0.0037	5.06934e-05	-0.000710104
127	0.01249	0.00251	0.000977313		127	0.00281	-0.000466241	-0.000330214		127	0.00375	0.000247249	-0.000743153
127.5	0.01239	0.00274	0.000469076		127.5	0.00326	-0.000810348	0.000136019		127.5	0.00376	0.000188304	-0.000885703
128	0.01244	0.00245	0.000853838		128	0.0029	-0.000349454	-0.000363748		128	0.00385	-5.31404e-05	-0.000955252
128.5	0.01249	0.00251	0.0003456		128.5	0.00334	-0.000532561	-5.85148e-05		128.5	0.00368	0.000143415	-0.000878801
129	0.01269	0.00274	0.000730362		129	0.00298	-0.000232667	-0.000397282		129	0.00362	8.44704e-05	-0.00113
129.5	0.01244	0.0028	0.000580124		129.5	0.00326	-0.000737774	6.89511e-05		129.5	0.00363	-8.39742e-05	-0.00127
130	0.01264	0.00269	0.000607886		130	0.00306	-0.00043788	-0.000430816		130	0.0036	3.95812e-05	-0.00127
130.5	0.01254	0.00275	0.000635648		130.5	0.00334	-0.000781987	-0.000125583		130.5	0.0035	-1.93634e-05	-0.00108
131	0.01274	0.00245	0.00030541		131	0.00298	-0.000482094	-0.00046435		131	0.00348	-0.000187808	-0.00123
131.5	0.01264	0.00286	0.000869172		131.5	0.00343	-0.0008262	-0.000159117		131.5	0.00371	-6.42526e-05	-0.00122
132	0.01284	0.00257	0.000360934		132	0.00306	-0.000526307	-0.000336884		132	0.00387	0.000132303	-0.00115
132.5	0.01274	0.0028	0.000746697		132.5	0.00351	-0.000870413	-0.000192651		132.5	0.00392	7.33582e-05	-0.00114
133	0.01309	0.00233	0.000238459		133	0.00299	-0.00040952	-0.000209419		133	0.00408	0.000123914	-0.0014
133.5	0.01283	0.00257	0.000623221		133.5	0.00327	-0.000914626	-0.000226186		133.5	0.00405	0.000320469	-0.00143
134	0.01303	0.00227	0.000471983		134	0.00307	-0.000775733	-0.000242953		134	0.00388	0.000188524	-0.00139
134.5	0.01278	0.00269	0.000499745		134.5	0.00335	-0.00112	-0.00042072		134.5	0.00378	9.30798e-05	-0.00164
135	0.01298	0.00221	0.000349507		135	0.00331	-0.000980946	-0.000276487		135	0.0039	0.000216635	-0.00167
135.5	0.01303	0.00281	0.000198269		135.5	0.00327	-0.001	-0.000454254		135.5	0.00392	1.16906e-05	-0.00167
136	0.01293	0.00233	0.000762031		136	0.00323	-0.00103	-0.000149021		136	0.00393	-8.3754e-05	-0.00148
136.5	0.01313	0.00257	0.000432793		136.5	0.00319	-0.000886266	-0.000648788		136.5	0.00387	3.30143e-06	-0.00166
137	0.01318	0.00227	0.000460556		137	0.00364	-0.00107	-0.000182555		137	0.00399	9.03568e-05	-0.0017
137.5	0.01338	0.00233	0.000488318		137.5	0.00311	-0.000608479	-0.000682322		137.5	0.00404	-7.80878e-05	-0.00169
138	0.01328	0.00239	0.00033708		138	0.00372	-0.000952585	-0.000216089		138	0.00412	-2.75324e-05	-0.00173
138.5	0.01333	0.00263	0.000186842		138.5	0.00336	-0.000491692	-0.000554857		138.5	0.00428	9.6023e-05	-0.00194
139	0.01338	0.00233	0.000749604		139	0.00364	-0.000996798	-0.000249624		139	0.00425	-7.24215e-05	-0.00208
139.5	0.01343	0.00239	0.000242366		139.5	0.00344	-0.000535905	-0.000588391		139.5	0.00405	-9.48661e-05	-0.00201
140	0.01347	0.00209	0.000805128		140	0.00372	-0.00104	-0.000122158		140	0.00395	0.000101689	-0.0023
140.5	0.01352	0.00251	0.00047589		140.5	0.0032	-0.000741118	-0.000621925		140.5	0.00411	-6.67553e-05	-0.0024
141	0.01342	0.00257	0.000860652		141		-0.00125	-0.000316692		141	0.00405	-0.0001257	-0.0024
141.5	0.01362	0.00245	0.000353415		141.5		-0.000785331	-0.000816459		141.5	0.00413	7.08555e-05	-0.00221
142	0.01352	0.00251	0.000559177		142		-0.00113	-0.000350226		142	0.00414	-6.10891e-05	-0.00232
142.5	0.01357	0.00221	0.000408939		142.5		-0.000829544	-0.000527993		142.5	0.00419	-0.000229534	-0.00235
143	0.01362	0.00281	0.000436701		143		-0.00101	-0.00038376		143	0.00406	-6.94783e-05	-0.00224
143.5	0.01367	0.00233	0.000464463		143.5		-0.00103	-0.000561527		143.5	0.0041	-0.000201423	-0.00224
144	0.01372	0.00257	0.000313225		144		-0.000895864	-0.000578295		144	0.00426	-0.000369868	-0.00231
144.5	0.01377	0.00227	0.000519987		144.5		-0.00108	-0.000434062		144.5	0.00409	-0.000246312	-0.00227
145	0.01367	0.00233	0.000189749		145		-0.000940077	-0.000450829		145	0.00399	-0.000195757	-0.00215
145.5	0.01387	0.00221	0.000396511		145.5		-0.00128	-0.000306596		145.5	0.00412	-0.000291201	-0.00237
146	0.01376	0.00227	0.000245273		146		-0.00098429	-0.000806363		146	0.00391	-0.000204146	-0.00255
146.5	0.01411	0.00269	0.000631036		146.5		-0.00133	-0.00050113		146.5	0.00385	-0.00011709	-0.00251
147	0.01401	0.00239	0.000300798		147		-0.00103	-0.001		147	0.00401	-0.000139535	-0.00236
147.5	0.01406	0.00281	0.00050756		147.5		-0.00137	-0.000534664		147.5	0.00409	-0.00023498	-0.00257
148	0.01411	0.00233	0.000178322		148		-0.00123	-0.000873431		148	0.00418	-0.000111424	-0.00264
148.5	0.01416	0.00257	0.000920084		148.5		-0.00126	-0.000568198		148.5	0.00422	-0.000206869	-0.00271
149	0.01406	0.00227	0.000233846		149		-0.00144	-0.000745965		149	0.00431	-0.000411813	-0.00271
149.5	0.01426	0.00269	0.000439608		149.5		-0.0013	-0.000440733		149.5	0.00406	-0.000251758	-0.00289
150	0.01416	0.00221	0.00011037		150		-0.00132	-0.0009405		150	0.00389	-0.000201203	-0.00285
150.5	0.01436	0.00281	0.000674132		150.5		-0.00134	-0.000635267		150.5	0.00409	-0.000296647	-0.00281
151	0.01426	0.00215	-1.31054e-05							151	0.00414	-0.000136592	-0.00302
151.5	0.01446	0.00293	0.000193657							151.5	0.00411	5.99635e-05	-0.0032
152	0.01435	0.00245	0.000400419							152	0.00416	-0.000108481	-0.00324
152.5	0.01456	0.00305	0.000249181							152.5	0.00417	-5.79256e-05	-0.00301
153	0.0143	0.00239	9.7943e-05							153	0.004	6.56298e-05	-0.00319
153.5	0.0145	0.00299	0.000125705							153.5	0.00394	-6.63148e-05	-0.00315
154	0.0144	0.00251	0.000332467							154	0.00406	-0.000198259	-0.00304
154.5	0.0146	0.00257	0.000360229							154.5	0.00404	-0.000111204	-0.00307
155	0.0145	0.00245	0.000387991							155	0.00405	-0.000170149	-0.00329
155.5	0.01455	0.00251	0.000415754
156	0.01475	0.00257	0.000264516
156.5	0.01465	0.00227	0.000471278
157	0.0147	0.00287	-0.00021596
157.5	0.01459	0.00239	0.000169802
158	0.0148	0.00263	-0.000160436
158.5	0.01469	0.00251	0.000225326
159	0.01504	0.00257	7.40883e-05
159.5	0.01479	0.00245	0.00045885
160	0.01484	0.00287	0.000129612
160.5	0.01489	0.00239	0.000157375
161	0.01509	0.00281	0.000364137
161.5	0.01499	0.00233	3.38988e-05
162	0.01519	0.00275	0.000419661
162.5	0.01494	0.00227	8.9423e-05
163	0.01529	0.00269	0.000296185
163.5	0.01519	0.00239	0.000144947
164	0.01539	0.00263	0.000172709
164.5	0.01513	0.00215	-0.000334529
165	0.01533	0.00239	5.02336e-05
165.5	0.01523	0.00227	-0.000458004
166	0.01528	0.00233	0.000105758
166.5	0.01533	0.00221	-0.00022348
167	0.01538	0.00227	-1.7718e-05
167.5	0.01543	0.00216	-0.000525956
168	0.01548	0.00239	3.78062e-05
168.5	0.01553	0.0021	-0.000470432
169	0.01558	0.00216	-8.46696e-05
169.5	0.01563	0.00221	-0.000592907
170	0.01568	0.00227	-2.91454e-05
170.5	0.01573	0.00251	-0.000359383
171	0.01577	0.00204	-0.000152621
171.5	0.01567	0.00245	-0.000660859
172	0.01587	0.00198	-0.000276097

## Sheet: FR C. thermalis
FR C. thermalis
Replicate 1					Replicate 2					Replicate 3				Replicate 4				Replicate 5					Replicate 6
	Acceptors	DCMU	DCMU+Histidine			Acceptors	DCMU	DCMU+Histidine			Acceptors	DCMU+Histidine			Acceptors	DCMU+Histidine			Acceptors	DCMU	DCMU+Histidine			Acceptors	DCMU	DCMU+Histidine
0	-9.69807e-05	-3.66251e-05	-0.000541018		0	-0.000252374	6.96031e-05	-0.000347642		0	0.00011822	-0.000672607		0	-0.000580473	-0.000850883		0	9.5226e-05	0.000140345	-0.000705675		0	-4.14075e-05	0.000161987	-0.000385698
0.5	-7.09249e-05	0.000177466	-0.000521951		0.5	9.81912e-05	4.51541e-05	0.000126923		0.5	-0.000225217	-0.00121		0.5	-0.000539602	0.000189085		0.5	-7.68616e-05	0.000204306	-0.000546529		0.5	-9.46145e-05	-0.000273318	-0.000370199
1	-4.4869e-05	3.55566e-05	-0.000324885		1	0.000126757	0.000503705	-0.000203513		1	-4.36532e-05	-0.00046767		1	-0.000498732	-0.000567947		1	6.55092e-06	1.27679e-05	-0.000314382		1	-3.75714e-05	-0.000378123	-0.00053845
1.5	-1.88132e-05	0.000249647	-0.000662818		1.5	-5.67748e-06	-3.7439e-06	0.000110051		1.5	-3.70896e-05	-0.00101		1.5	-0.000816862	0.000473021		1.5	5.34634e-05	-6.92707e-05	-8.2236e-05		1.5	-9.05284e-05	0.000141572	-0.000155701
2	7.24264e-06	-0.000250262	-0.000286752		2	0.000183888	0.000454807	-0.000220384		2	-0.000205526	-0.000263732		2	-0.000775992	7.4989e-05		2	-0.000228124	0.000104441	-0.00010559		2	-0.000364235	-0.000624484	-6.67017e-05
2.5	3.32985e-05	0.000143829	-0.000445685		2.5	-0.000109546	0.000108358	9.31798e-05		2.5	0.000151037	-0.000803263		2.5	-0.000735121	3.69569e-05		2.5	3.77883e-05	-5.05979e-05	-5.59433e-05		2.5	-1.31923e-05	0.000225961	0.000610047
3	-9.16457e-05	-0.00017808	-6.96187e-05		3	8.00195e-05	0.000566909	-0.000398256		3	-0.000367399	0.000124205		3	-0.00105	0.000358925		3	-9.77992e-05	-0.000132886	-0.000225297		3	-0.000213399	-0.000282844	0.000662297
3.5	0.00023541	-0.000319989	-5.05522e-05		3.5	-5.24149e-05	5.94601e-05	0.000237308		3.5	-0.000360835	-0.000415326		3.5	-0.000294381	-3.91071e-05		3.5	-0.000196887	4.0575e-05	-0.000139151		3.5	0.000137394	-0.000277399	0.000494296
4	-3.9534e-05	-0.000283898	-3.14857e-05		4	-2.38492e-05	0.000518011	-0.000254127		4	-0.000354272	-0.000955857		4	-0.000253511	-0.000436139		4	-7.69742e-05	-0.000260714	-8.95042e-05		4	0.000120937	0.000242295	0.000215795
4.5	0.000137522	-0.000247808	-0.000191419		4.5	4.71646e-06	1.0562e-05	0.000381437		4.5	-0.000172708	-0.000211388		4.5	-0.000571641	-0.000115171		4.5	-0.000176062	-0.000196752	-0.000185858		4.5	-5.77015e-06	-0.00048701	-0.000503456
5	1.25776e-05	-0.000211717	0.000185647		5	-0.000127718	0.000469113	-0.000109999		5	8.85517e-06	-0.00093492		5	0.00018823	-0.000512203		5	-0.000348149	-0.000205791	-6.32115e-05		5	1.45229e-05	0.000326685	-0.000634957
5.5	3.86335e-05	-0.000354626	2.57137e-05		5.5	-0.000260152	0.000122664	0.000203566		5.5	-0.000509581	0.000176549		5.5	-0.0001309	-0.000191235		5.5	-0.000264737	-0.000470579	-0.000196065		5.5	-0.000259184	-0.00040262	-0.000729707
6	6.46893e-05	3.84649e-05	-0.00013422		6	9.04134e-05	0.000420215	-0.00012687		6	2.19823e-05	-0.000362982		6	0.00026997	0.000130733		6	-0.000363824	-0.000223868	-0.000146419		6	-1.8391e-05	-0.000213426	-0.000236708
6.5	9.07451e-05	-0.000461444	6.38467e-05		6.5	-4.20209e-05	7.3766e-05	0.000186694		6.5	-0.000321454	0.000197487		6.5	-4.91597e-05	0.000451701		6.5	-0.000462912	-0.000415657	-0.000133272		6.5	-0.000181848	4.92692e-05	0.000109541
7	-3.41991e-05	-6.73534e-05	-9.60868e-05		7	-1.34553e-05	0.000371317	-0.000143742		7	0.000210109	-0.000159045		7	-8.28953e-06	0.000773669		7	-0.000306499	-0.000278695	-0.000120126		7	0.000132445	-0.000422786	0.00060254
7.5	-8.14323e-06	-0.000389263	0.00028098		7.5	1.51104e-05	2.4868e-05	0.000169823		7.5	4.16729e-05	-0.00107		7.5	-0.000326419	0.000375637		7.5	-0.000332587	-0.000214734	-0.00017998		7.5	0.000189488	0.000390909	0.000360789
8	-0.000133087	-0.000174172	-5.79539e-05		8	4.36761e-05	0.000161419	-0.000321613		8	4.82364e-05	0.000228893		8	-0.000645549	-0.000381395		8	-0.000285674	-0.000333522	-0.000239833		8	0.000209781	-0.000338397	9.03842e-06
8.5	-0.000258032	-0.000138081	-0.000216887		8.5	7.22417e-05	-2.403e-05	0.000152951		8.5	0.0002298	-0.00141		8.5	-0.000604679	-0.000419428		8.5	-0.000202262	-0.000269561	-0.000518937		8.5	0.000230074	3.42982e-05	-0.000342962
9	-8.09757e-05	-0.00028099	-0.000197821		9	-6.01926e-05	0.000273521	-0.000338484		9	-0.000113636	-0.00011717		9	-0.000563809	-9.74595e-05		9	-0.00011885	-0.000315099	-0.000469291		9	-0.000116883	0.000223243	-0.000841713
9.5	-5.49199e-05	-0.000422899	0.000178246		9.5	0.000129373	-7.29281e-05	0.00013608		9.5	6.79271e-05	-0.000289701		9.5	-0.000522938	-0.00121		9.5	-0.000181437	-0.000433638	-0.000346644		9.5	8.71603e-05	-0.000175312	-0.000311964
10	-2.88641e-05	-0.000386808	-0.000338688		10	-0.000164061	0.000224623	-0.000355356		10	-0.000275509	0.000270768		10	-0.000482068	-0.000533524		10	4.79754e-05	-0.000223427	-0.000369998		10	-0.000186297	0.000454632	-0.000149465
10.5	-2.80824e-06	-0.000350718	3.73786e-05		10.5	-0.000135496	3.91739e-05	0.000119208		10.5	-0.000268946	-0.000268763		10.5	-8.1198e-05	-0.000571556		10.5	2.18879e-05	-0.000305465	8.39852e-06		10.5	0.000164746	-0.000348173	0.000453784
11	2.32476e-05	-0.000493627	-0.000300555		11	0.00037607	0.000336725	-0.000372227		11	-8.73823e-05	-7.52947e-05		11	-0.000400328	-0.000249588		11	3.23004e-05	-0.000278004	-0.000124455		11	0.000185039	-8.5478e-05	0.000469283
11.5	-0.000101697	-0.000457536	-0.000102488		11.5	-7.83644e-05	-9.72409e-06	0.000263337		11.5	-0.000430819	0.000118174		11.5	5.42397e-07	7.13803e-05		11.5	0.000188713	-0.000141042	-0.000147809		11.5	-8.84176e-05	-8.00332e-05	0.000301283
12	7.53592e-05	-6.4445e-05	-0.000441422		12	0.000272201	0.000448827	-0.000228099		12	0.000100745	-0.00116		12	4.14126e-05	3.33482e-05		12	8.96253e-05	-0.000369331	-0.000134662		12	0.000152125	-0.000405088	-8.74682e-05
12.5	-4.95849e-05	-2.83542e-05	-0.000243355		12.5	-2.1233e-05	0.000102378	0.000246466		12.5	-0.000242692	0.000323112		12.5	0.000441283	0.000355316		12.5	0.000136538	-1.31195e-05	-0.000304016		12.5	-0.000341831	0.000261606	-0.000549469
13	0.000127471	7.73662e-06	-4.5289e-05		13	0.000329333	0.000399929	-0.00024497		13	0.000113872	-0.00113		13	0.000123153	-0.000401716		13	0.00021995	-0.000168158	-0.00047337		13	8.96154e-06	-0.000467699	-0.00057072
13.5	2.52674e-06	-0.000134173	-0.000205223		13.5	-0.000286102	5.34799e-05	6.85942e-05		13.5	-0.000229565	0.000711049		13.5	-0.000195977	0.000279252		13.5	0.000157363	5.5533e-06	-0.000314223		13.5	6.60046e-05	-5.82542e-05	-0.000738971
14	2.85826e-05	-9.80817e-05	0.000170844		14	0.000225464	0.000512031	-0.000261841		14	0.000301999	-0.000746482		14	-0.000155107	-0.00083778		14	9.47752e-05	6.95147e-05	-0.000228077		14	0.000196548	-8.95594e-05	-0.000135721
14.5	5.46384e-05	-6.19909e-05	-0.00016709		14.5	-0.00038897	0.000165582	0.000212723		14.5	0.000133562	0.000731987		14.5	-0.000833236	-0.000875812		14.5	0.000214688	-0.000122274	-0.000324431		14.5	0.000327091	-0.000414615	-4.67223e-05
15	8.06942e-05	-0.0003829	-0.000148023		15	0.000121595	0.000463133	-0.000278713		15	-3.4874e-05	-0.000174545		15	-7.33661e-05	-0.000194844		15	6.10015e-06	0.000160688	-0.000311284		15	-1.98663e-05	0.00021533	0.000483027
15.5	0.00010675	-0.000346809	-0.000307957		15.5	-0.000331839	0.000116684	3.48514e-05		15.5	0.00014669	-0.000531076		15.5	-0.00183	0.000127124		15.5	-5.64874e-05	5.39897e-06	-0.000772888		15.5	3.69267e-05	-0.000550725	0.000351526
16	0.000132806	-0.000489718	6.91099e-05		16	0.000339727	0.000575235	-0.000295584		16	-0.000196747	2.93927e-05		16	0.000727374	0.000448092		16	2.69251e-05	0.00014236	-0.000759742		16	-0.00031003	-6.77804e-05	-7.37247e-05
16.5	8.86172e-06	-0.000274628	-0.000269824		16.5	-0.000274708	0.000228786	1.798e-05		16.5	0.000159817	-0.000877139		16.5	4.92445e-05	0.00077006		16.5	-3.56624e-05	9.68218e-05	-0.000600595		16.5	0.000114263	-0.000172586	-0.000315476
17	3.49176e-05	-0.000417537	0.000107243		17	0.000235858	0.000365337	-0.000312456		17	-0.00035862	0.00041733		17	0.000450115	0.00109		17	-9.825e-05	-5.82168e-05	-0.000404949		17	9.78059e-05	-0.000534391	-0.000887726
17.5	0.000210973	-0.000560446	-0.000231691		17.5	-5.75765e-05	1.88878e-05	0.000162109		17.5	-2.05625e-06	-0.000489201		17.5	0.000130985	0.000693996		17.5	2.16625e-05	7.87446e-05	9.94757e-06		17.5	0.000375349	0.000279304	-0.000541477
18	8.70292e-05	-0.000345355	0.000145376		18	0.000292989	0.000316439	-0.000329327		18	-0.000345493	0.000805268		18	0.000531855	0.000655964		18	3.2075e-05	-0.000112794	-1.34061e-05		18	0.000395642	-0.000523501	-0.000305478
18.5	0.000113085	-0.000488264	-0.000371558		18.5	-0.000160445	-3.00102e-05	0.000145237		18.5	-0.000163929	-0.000468264		18.5	-0.000146275	0.000257932		18.5	4.24875e-05	-4.88325e-05	0.00010924		18.5	4.8435e-05	0.000179943	0.000224271
19	0.000139141	-0.000273173	4.50882e-06		19	0.00035012	0.000267541	-0.000346199		19	-0.000332366	0.000642205		19	0.000613596	-0.0001391		19	0.0001259	-2.13711e-05	8.58867e-05		19	0.000142228	0.000222138	0.00035002
19.5	0.000315197	-0.000416083	-0.000333425		19.5	-0.000103314	8.20918e-05	0.000128366		19.5	-0.000325802	-8.03261e-05		19.5	-6.45342e-05	-0.000177132		19.5	0.000245812	-0.00017641	6.2533e-05		19.5	-0.000241479	-0.000139667	0.00018177
20	0.000191253	-0.000200992	-0.000136358		20	0.000246252	0.000218643	-0.00020207		20	0.000205761	-0.000803857		20	-2.3664e-05	-0.000575164		20	0.000219725	3.35517e-05	7.56794e-05		20	0.000109314	0.000637278	-0.000243731
20.5	0.000217308	-0.000521901	-0.000117292		20.5	-4.61825e-05	0.000194194	0.000111494		20.5	-0.000312675	0.000123611		20.5	-0.000342794	-0.000253196		20.5	0.000193637	-0.000194487	5.23257e-05		20.5	-9.06428e-05	-0.000349278	-0.000668982
21	9.23642e-05	-0.00030781	-0.000276225		21	0.000303383	0.000169745	-0.000218941		21	0.000218889	-0.00078292		21	-0.000660924	6.77716e-05		21	0.00038655	1.54745e-05	0.000174972		21	0.00018665	0.000243917	-0.000616733
21.5	-3.258e-05	0.000264281	-7.91588e-05		21.5	0.000170949	0.000145296	9.46229e-05		21.5	-0.000299548	0.000694549		21.5	-0.000620053	2.97395e-05		21.5	0.000214462	-3.0064e-05	0.000151618		21.5	0.000243693	-0.000118138	-0.000527734
22	-6.52414e-06	0.000122372	-0.000417092		22	0.000360514	0.000120847	-0.000235813		22	0.000232016	-0.000394982		22	-0.000939183	0.000710707		22	0.000261375	-0.000112103	0.000164765		22	0.000116986	-0.000406443	0.000259265
22.5	0.000170532	-0.000199538	0.000137974		22.5	6.80801e-05	0.000257398	0.000238752		22.5	-0.000111421	0.000899486		22.5	-0.000538313	-4.63246e-05		22.5	0.000344787	-8.46412e-05	0.000104911		22.5	0.000321029	0.000297001	0.000348265
23	-0.000105412	1.55533e-05	-0.000378959		23	0.000417646	7.19487e-05	-9.16842e-05		23	-0.000279857	-0.000374045		23	-0.000497443	-0.000443357		23	0.0002822	-0.00042218	4.50575e-05		23	-2.59276e-05	-0.000616054	0.000547514
23.5	0.000222643	0.000230644	-2.89282e-06		23.5	0.000125211	0.0003695	0.00022188		23.5	7.67063e-05	0.000186424		23.5	0.000621428	0.000237611		23.5	0.000256112	-0.000212218	-0.000234046		23.5	0.000214615	0.000344641	0.000195513
24	9.76992e-05	0.000266735	-0.000161826		24	0.000474777	-0.000137949	-0.000269556		24	-0.00026673	-0.000170107		24	-5.67023e-05	-0.000519421		24	0.000376025	-0.000257757	-7.48997e-05		24	5.14084e-05	-1.74143e-05	-0.000486988
24.5	0.000425755	0.000302826	-0.00014276		24.5	2.13427e-05	0.000481602	0.000205009		24.5	0.000264833	-0.000709639		24.5	0.000344168	0.000520547		24.5	0.000167437	-0.000157296	8.42466e-05		24.5	0.000438951	-0.00012222	-0.000655239
25	0.000149811	0.000159917	-0.000123693		25	0.000370908	0.000135153	-0.000286427		25	-0.000253603	-0.00014917		25	-0.000333962	-0.000236485		25	0.00021435	-9.33341e-05	0.000352893		25	0.000459245	0.000470975	-0.00101
25.5	0.000175867	0.000375008	-0.000104627		25.5	0.000239474	0.000432704	0.000188137		25.5	0.00027796	-0.000138701		25.5	-0.000293092	0.000804483		25.5	0.000334262	-0.000357873	0.000804289		25.5	0.000369288	-0.00036858	-0.00062424
26	0.000201923	-0.000303902	0.00027144		26	0.00042804	-7.47454e-05	-0.000303298		26	-0.000240476	0.000421768		26	-0.000252221	4.74512e-05		26	0.000198675	-0.000184411	0.000853936		26	0.000463081	0.000518615	-0.000351491
26.5	0.000227978	0.000268189	-0.000245494		26.5	0.000135605	0.000383806	0.000171266		26.5	0.000116088	-0.000300764		26.5	-0.000571351	0.000728419		26.5	0.000282087	-0.00026645	0.000903582		26.5	-6.76264e-05	0.000120059	0.000141758
27	0.000254034	-5.272e-05	0.000309573		27	0.000485171	0.000198357	-0.00015917		27	0.000122651	0.000259705		27	-0.000530481	0.000690387		27	0.000401999	-0.000165988	0.000916728		27	0.000209667	5.20043e-05	0.000194007
27.5	0.00028009	0.000161371	-0.000385361		27.5	-0.000129263	0.000495908	0.000154394		27.5	-4.57854e-05	8.71738e-05		27.5	-0.00121	-0.000426645		27.5	0.000229912	-0.000102027	0.000929875		27.5	-6.37903e-05	0.000534949	0.000136006
28	0.000306146	-0.000159538	-9.29445e-06		28	0.000382302	-1.15414e-05	-1.50413e-05		28	0.000310778	-0.000820357		28	-0.000448741	-0.000104677		28	0.000240324	-0.000366566	0.000943021		28	0.000250253	-0.000304606	-0.000215994
28.5	0.000181202	5.55525e-05	0.000187772		28.5	-7.2132e-05	0.00044701	-2.3477e-05		28.5	-0.000207658	0.000108111		28.5	-0.00076687	-0.000502709		28.5	0.000360237	-8.36042e-05	0.000773668		28.5	0.000233796	0.000398839	-0.000678245
29	0.000207257	-8.73567e-05	0.000206839		29	0.000439434	-6.04394e-05	-3.19127e-05		29	0.000148905	-0.00043242		29	-7.00012e-06	-0.000540741		29	0.000188149	-0.000238643	0.000312064		29	0.000364339	-3.64667e-05	-0.000552496
29.5	0.000233313	-5.12658e-05	-0.000131095		29.5	-1.50007e-05	0.000398112	-4.03484e-05		29.5	0.000330469	0.000495049		29.5	-0.00032613	-0.000218773		29.5	0.000235062	7.81862e-06	-4.00398e-05		29.5	0.000421382	-0.000214522	-0.000426747
30	0.000259369	-1.5175e-05	0.000244971		30	0.000174565	-0.000109337	-4.87841e-05		30	-1.29677e-05	0.000139518		30	-0.00064426	-0.000616805		30	0.000354974	7.178e-05	-0.000428393		30	0.000111175	0.000305173	-6.99777e-06
30.5	0.000135425	2.09159e-05	-0.000270962		30.5	0.000203131	0.000510214	0.00010378		30.5	0.000343596	0.000699986		30.5	-0.000244389	0.000783163		30.5	0.000255887	-8.32585e-05	-0.000378747		30.5	0.000498718	-0.000387382	-0.000175249
31	0.000311481	-0.000121993	0.000283104		31	0.000231696	2.76454e-06	-6.56555e-05		31	-0.000174841	0.000160455		31	-0.000203519	2.61308e-05		31	0.000193299	0.000236203	-0.000292351		31	4.761e-06	0.000352812	-0.000233249
31.5	3.65366e-05	-8.59025e-05	-0.000232829		31.5	0.000260262	0.000461316	8.69088e-05		31.5	0.000356723	-0.000196076		31.5	-0.000162649	-0.000730901		31.5	0.000349712	4.46643e-05	-9.64543e-05		31.5	0.000465804	-8.27429e-05	-0.000622
32	6.25925e-05	-4.98116e-05	-3.57626e-05		32	0.000288828	-4.61335e-05	-8.25269e-05		32	-0.000161713	0.000547393		32	-0.000480779	0.000310067		32	0.000104624	0.000108626	-0.000120058		32	0.000265597	-0.000187548	-0.00105
32.5	-6.23517e-05	-0.000370721	-0.000373696		32.5	0.000156393	0.000251418	0.000231037		32.5	0.00019485	-0.000909139		32.5	-8.09086e-05	-0.000806965		32.5	5.53669e-06	0.000172587	-0.000179912		32.5	2.88901e-05	0.000332147	-0.000888002
33	0.000114704	2.237e-05	-0.00035463		33	0.000184959	-9.50315e-05	-9.93984e-05		33	2.64136e-05	0.00075233		33	-0.000399038	-0.000484997		33	8.89492e-05	-1.89515e-05	-9.37652e-05		33	0.000379683	-0.000360409	-0.00109
33.5	-1.024e-05	-0.000476539	-0.000335563		33.5	0.000213525	0.000202519	0.000214166		33.5	3.29771e-05	-0.000154201		33.5	8.318e-07	0.000195971		33.5	-4.66384e-05	0.00015451	-7.61887e-06		33.5	-4.02379e-06	0.000490036	-0.000713004
34	0.000166816	9.45517e-05	-0.000316497		34	0.00024209	1.70705e-05	4.47302e-05		34	0.000214541	0.00114		34	-0.000317298	-0.000561061		34	-0.000109226	-5.28635e-07	0.000151777		34	0.000420269	-9.22691e-05	-0.000403504
34.5	0.000192872	-0.000404357	-0.00029743		34.5	0.000109656	0.000153621	0.000358295		34.5	-0.000303896	-0.000133264		34.5	0.000442572	0.000478907		34.5	8.36866e-05	0.000209433	0.000274424		34.5	0.000293562	-1.33244e-05	-0.000520505
35	6.79275e-05	-1.12666e-05	-0.000457364		35	0.000138221	-3.18275e-05	2.78588e-05		35	0.000227668	0.000610205		35	-0.000954558	8.18745e-05		35	-5.19009e-05	0.000200394	0.00032407		35	0.000277105	0.00028612	-0.000358006
35.5	9.39833e-05	-0.000332176	0.000276703		35.5	0.000166787	0.000104723	0.000341423		35.5	-0.000465769	0.000254674		35.5	0.000883313	0.000762842		35.5	-7.79885e-05	0.000191356	0.000300717		35.5	0.000223898	-0.000296185	-0.000489507
36	0.000120039	-0.000118085	-0.000240231		36	0.000356353	8.02744e-05	1.09874e-05		36	6.57948e-05	-0.000652858		36	-0.000872817	0.00108		36	4.1924e-05	0.000255317	0.000240863		36	2.39414e-05	0.00048076	-0.000547508
36.5	0.000146095	-0.000259994	-4.21642e-05		36.5	6.29184e-05	0.000216825	0.000324552		36.5	-0.000277642	0.000275611		36.5	0.000606053	-3.22216e-05		36.5	5.23365e-05	-9.22155e-06	0.000181009		36.5	0.000337984	-0.000248545	-0.000679008
37	0.000172151	-0.000223903	-0.000381098		37	0.000252484	-0.000129624	-0.000166884		37	7.89219e-05	-0.00044792		37	-7.20767e-05	0.000648746		37	2.62489e-05	1.82399e-05	0.000121156		37	0.000138027	5.06494e-05	-0.000112509
37.5	0.000349207	-0.000187812	0.000173969		37.5	0.00028105	0.000328927	-1.43197e-05		37.5	-8.95145e-05	0.000846549		37.5	-3.12065e-05	-0.000108286		37.5	0.000219161	-0.000173299	6.1302e-05		37.5	0.000452071	9.28442e-05	0.00019699
38	7.32624e-05	-0.000687722	-0.000342965		38	0.000148615	-1.75216e-05	0.000138245		38	-0.000257951	-0.000426983		38	-0.000709336	0.000212682		38	0.000229574	-3.63373e-05	0.000110948		38	0.000288614	-0.000342461	0.000579989
38.5	0.000250318	-0.000115631	0.000212102		38.5	0.000177181	0.000280029	0.000129809		38.5	9.86126e-05	0.000867486		38.5	5.05339e-05	-0.00126		38.5	9.39864e-05	-4.53759e-05	1.45947e-05		38.5	5.19066e-05	0.000324234	0.000374988
39	-2.56259e-05	-0.00061554	-0.000304832		39	0.000205747	9.45804e-05	0.000282373		39	-0.000244824	-0.000406045		39	9.14042e-05	0.000136618		39	0.000250399	5.50855e-05	6.42411e-05		39	0.00018245	-0.000405072	-1.35126e-05
39.5	0.00030243	-4.34491e-05	7.22347e-05		39.5	0.000556312	7.01314e-05	0.000273937		39.5	-6.32603e-05	-0.000395576		39.5	0.000132274	-0.000620414		39.5	0.000114811	4.60469e-05	-3.21125e-05		39.5	-0.000127757	4.37319e-06	-0.000475763
40	0.000177486	-0.000543358	-0.000266699		40	-5.9122e-05	4.56824e-05	0.000265502		40	0.000118303	-1.81076e-05		40	0.000532145	0.000420554		40	-2.07762e-05	-3.59916e-05	1.75338e-05		40	0.000113036	4.65679e-05	-0.000680764
40.5	0.000354542	-0.000150267	0.000110368		40.5	0.000613444	-0.000139767	9.6066e-05		40.5	-0.000225133	-0.000558639		40.5	0.000214015	2.25221e-05		40.5	0.000135636	-0.00011803	-5.81981e-06		40.5	0.000133329	-0.000278487	-0.000408015
41	0.000229597	-0.000293177	-0.000228566		41	-1.99065e-06	0.000157784	-0.00023437		41	0.00013143	0.00036983		41	0.000613885	0.00106		41	3.65487e-05	-0.000309569	-2.91735e-05		41	0.000190372	0.000351457	-0.000319016
41.5	0.000104653	0.000100914	-3.04993e-05		41.5	0.000509575	0.000133335	-8.18054e-05		41.5	-0.000387006	-0.000170701		41.5	-6.42448e-05	-5.3542e-05		41.5	-2.60388e-05	-9.96074e-05	-1.60271e-05		41.5	0.000173915	-0.000304348	0.000467983
42	0.000281709	-4.19949e-05	-0.000190433		42	0.000377141	0.000269886	-0.000251241		42	-3.04426e-05	0.000573767		42	0.000336625	-9.1574e-05		42	0.000130374	8.54024e-07	-3.93807e-05		42	1.04579e-05	6.8347e-05	0.000409982
42.5	0.000156765	0.000351096	0.000186634		42.5	0.000405706	8.44373e-05	6.23232e-05		42.5	-0.000198879	3.42361e-05		42.5	-0.000701504	-0.000848606		42.5	3.12861e-05	6.48154e-05	1.02656e-05		42.5	-7.94991e-05	0.000110542	0.000645732
43	3.28207e-05	3.01867e-05	-0.0001523		43	0.000112272	0.000220988	-0.000268113		43	-0.000192316	-0.000322295		43	5.83659e-05	-0.000167638		43	5.19861e-06	0.000165277	-1.3088e-05		43	-0.000316456	-0.000214514	0.000293731
43.5	0.000208877	0.000423278	4.57666e-05		43.5	0.000301838	3.55393e-05	4.54518e-05		43.5	-0.000185752	0.000238174		43.5	-0.000978764	-0.00020567		43.5	0.000125111	-9.92617e-05	3.65584e-05		43.5	3.4587e-05	0.000341931	-0.00038877
44	0.000234932	-7.66316e-05	6.48331e-05		44	0.000330403	0.00017209	-0.000284984		44	-0.000179188	-0.000852358		44	0.000140106	0.000116298		44	9.90236e-05	-0.0001813	-2.32953e-05		44	-1.86199e-05	-0.000350624	-0.000336521
44.5	0.000110988	0.000317459	8.38996e-05		44.5	0.000197969	-1.33587e-05	0.00018958		44.5	0.000177375	0.000259111		44.5	-0.000897023	0.00116		44.5	-7.3064e-05	-0.000336339	2.63511e-05		44.5	0.000222173	2.20708e-05	-0.000651522
45	0.000287044	0.00017455	0.000102966		45	0.000226535	0.000284192	-0.000301855		45	-0.000341061	-9.74202e-05		45	-0.000137153	0.000400234		45	8.33485e-05	-8.98775e-05	2.99743e-06		45	0.000242466	-8.27345e-05	0.000208978
45.5	0.0001631	3.16409e-05	-0.000234967		45.5	9.41003e-05	-0.000223257	0.000172709		45.5	0.000365502	0.000464049		45.5	-0.000456283	0.00108		45.5	-5.2239e-05	-9.89161e-05	8.91438e-05		45.5	-0.000141491	-0.00037104	0.000261227
46	0.000189156	0.000246732	0.000498099		46	0.000283666	7.42943e-05	-0.000318727		46	-0.000152934	-7.64827e-05		46	0.000303587	0.00032417		46	-7.83266e-05	3.80454e-05	0.00010229		46	0.000209302	0.000332405	0.000313476
46.5	6.42116e-05	-0.000253177	-0.000196834		46.5	0.000151232	-0.000272155	0.000155838		46.5	0.000378629	0.000117986		46.5	-1.45426e-05	0.000645138		46.5	4.15859e-05	0.000102007	0.000115437		46.5	-6.44047e-05	-0.00050715	0.000218725
47	0.000241267	0.000497913	0.000358232		47	0.000340797	0.000186396	-0.000335598		47	3.51928e-05	0.000128455		47	0.000745328	-0.000830894		47	5.19984e-05	-0.000126032	5.53329e-05		47	0.000213138	0.000196295	-0.000316776
47.5	0.000116323	0.000176004	1.92985e-05		47.5	4.73629e-05	-0.000160053	-0.000344034		47.5	0.000216756	-0.000962076		47.5	6.71978e-05	-0.000149926		47.5	2.59109e-05	0.00012043	3.19792e-05		47.5	0.000306931	1.79893e-05	0.000176223
48	0.000142379	0.000212095	0.000574365		48	0.000397929	0.000137498	-3.04696e-05		48	0.00022332	0.000332392		48	0.000108068	-0.00127		48	0.000182323	-3.4609e-05	-2.81244e-05		48	-0.000150276	-0.000343816	0.000301973
48.5	1.74349e-05	7.01859e-05	5.74314e-05		48.5	-5.65058e-05	-4.79508e-05	-0.000199905		48.5	5.48834e-05	-0.00113		48.5	0.000507938	0.00013401		48.5	0.000156236	2.93524e-05	-5.1478e-05		48.5	0.000310767	0.000469879	0.000978722
49	0.000194491	0.000284277	0.000434498		49	0.00029406	0.0002486	-4.7341e-05		49	-0.000113553	0.00072033		49	0.000189808	-0.000624023		49	0.000166648	2.03139e-05	7.14183e-05		49	-0.00010994	-0.000479926	0.000847221
49.5	6.95465e-05	-3.66324e-05	9.55644e-05		49.5	0.000161626	-9.68488e-05	-0.000216777		49.5	-0.000281989	-0.000737202		49.5	-0.000129321	0.00114		49.5	0.000323061	-6.17247e-05	-6.16853e-05		49.5	0.000204354	0.000297018	0.00060572
50	9.56024e-05	0.000178458	0.000472631		50	-0.000131809	0.000199702	-0.000225212		50	-0.000100426	0.000558267		50	-0.000807451	1.99134e-05		50	0.000260473	-3.42633e-05	6.1211e-05		50	0.000187897	8.19631e-05	0.000363969
50.5	-2.93418e-05	-0.000143451	-4.43026e-05		50.5	5.77568e-05	-0.000306747	-0.000233648		50.5	-0.000268862	-0.000349264		50.5	-4.75809e-05	0.00106		50.5	0.000270886	-4.33019e-05	1.10741e-06		50.5	-0.00019581	-0.000206342	-0.000171531
51	-0.000153286	7.16401e-05	0.000331764		51	-7.46775e-05	0.000150804	-0.000242084		51	-0.000262299	-0.000705795		51	-0.000725711	-5.61507e-05		51	0.000281298	9.36595e-05	5.07538e-05		51	-0.000102017	0.000423603	6.44677e-05
51.5	0.00017377	-7.12691e-05	-6.16965e-06		51.5	0.000114888	-0.000355645	-0.00025052		51.5	9.42647e-05	0.000222673		51.5	3.41595e-05	-0.000814183		51.5	0.000255211	-2.48791e-05	6.39001e-05		51.5	-0.000485974	-0.000636453	0.000190217
52	-0.000252174	0.000143822	0.000369897		52	-0.000178546	-5.80939e-05	-0.000258955		52	-0.000249172	-0.000867858		52	-0.00028397	0.000226785		52	0.000229123	-3.39177e-05	0.000113546		52	4.85687e-05	0.000177242	0.000719966
52.5	7.48815e-05	9.12597e-07	0.000388963		52.5	0.000172019	-0.000404543	-0.000267391		52.5	0.000282392	0.000793611		52.5	0.0004759	-0.000170247		52.5	0.000458536	-6.45624e-06	9.01929e-05		52.5	-7.81383e-05	-0.000184813	0.000661965
53	-4.90626e-05	0.000216003	0.00022903		53	-0.000282415	5.30081e-05	-0.000275827		53	-6.10447e-05	-0.00047992		53	0.00015677	0.000150721		53	0.000213448	-0.000270995	0.000103339		53	0.000309655	-0.000289368	0.000530464
53.5	0.000126993	-0.000104906	0.000248096		53.5	6.81508e-05	-0.000292441	3.77376e-05		53.5	0.000295519	0.000264548		53.5	0.00019764	0.000112689		53.5	0.000333361	0.000121467	0.000152986		53.5	0.000293198	0.000414076	0.000215214
54	-0.000147951	0.000109185	0.000267163		54	-0.000225284	-0.00015589	-0.000131698		54	-4.79176e-05	-0.000275983		54	0.000238511	0.00115		54	0.000234273	2.92801e-06	0.000129632		54	-5.37591e-05	-0.000498979	-0.000136537
54.5	0.000179105	0.000145276	0.000644229		54.5	0.000286282	-0.000341339	2.08662e-05		54.5	0.000308646	-0.000632514		54.5	-0.000439619	3.66251e-05		54.5	-1.08145e-05	0.000212889	0.000179278		54.5	0.000370784	0.000314716	0.000393212
55	5.51607e-05	3.36677e-06	0.000127296		55	-7.15228e-06	-0.000365788	-0.000148569		55	0.000315209	-0.000255045		55	-3.8749e-05	0.000358593		55	0.000145598	0.000313351	0.000119425		55	2.3577e-05	-0.000157589	0.000482211
55.5	8.12165e-05	3.94576e-05	0.000324362		55.5	0.000182413	-6.92369e-05	0.000164995		55.5	0.000146773	-0.000794577		55.5	-0.000716879	-0.00112		55.5	1.00104e-05	8.53123e-05	0.000242321		55.5	0.00044812	-0.000298895	0.00064471
56	-4.37277e-05	-0.000103452	0.000165429		56	-0.000272021	-0.000253686	-4.44091e-06		56	-2.16634e-05	0.000132892		56	-0.000317009	-0.000436471		56	-8.90771e-05	0.000258774	0.000182217		56	0.000358163	0.0001843	0.000476459
56.5	0.000133328	0.000289639	0.000720495		56.5	0.000239545	-0.000278135	0.000148123		56.5	-0.0001901	-0.000223639		56.5	-0.000995138	-0.00155		56.5	6.73354e-05	-7.87649e-05	0.000268614		56.5	0.000121206	-0.000655255	5.12086e-05
57	0.000309384	0.00014773	0.000203562		57	-5.38897e-05	-0.000142584	0.000139688		57	0.000166464	-0.00058017		57	0.000124732	0.000206465		57	4.74785e-06	2.16965e-05	0.00020851		57	0.000288499	0.00012169	0.000213708
57.5	0.00033544	0.000183821	0.000400628		57.5	0.000296676	-0.000167033	-0.000190748		57.5	-0.000351973	0.000164298		57.5	-0.000913398	-0.000550567		57.5	-9.43397e-05	-6.03421e-05	0.000148656		57.5	-2.19578e-05	-0.000313866	0.000376207
58	6.04957e-05	4.09118e-05	-0.000116305		58	-0.000157758	-0.000191482	-3.81837e-05		58	0.000179591	-0.000559233		58	0.000206472	-0.000229599		58	2.55728e-05	-0.000105881	0.000125303		58	0.000292335	-0.000345171	0.000869206
58.5	0.000237551	7.70026e-05	0.000796761		58.5	0.000353807	-5.4931e-05	-0.000368619		58.5	1.11543e-05	0.000552236		58.5	-0.000471658	9.23688e-05		58.5	-7.35147e-05	6.75808e-05	0.000101949		58.5	0.000202378	0.000138024	0.000774455
59	0.000112607	0.000113093	0.000100828		59	-0.000100627	-0.00024038	-5.50552e-05		59	1.77178e-05	1.27046e-05		59	0.000647213	-0.00102		59	-0.000136102	-5.09578e-05	0.000115096		59	3.89213e-05	-0.000591281	0.000606205
59.5	0.000439663	0.000328184	0.000476894		59.5	0.000249939	-0.000103829	-0.000385491		59.5	2.42814e-05	-0.000894827		59.5	-3.09171e-05	-0.000343695		59.5	-1.61898e-05	8.60036e-05	5.49919e-05		59.5	0.000169464	0.000185663	0.000254204
60	0.000164719	0.000185275	-4.00394e-05		60	0.000278504	-0.000289278	-7.19266e-05		60	-0.000144155	0.000216642		60	0.000369953	-0.0011		60	-5.77732e-06	7.6965e-05	0.000104638		60	-0.000251243	-0.000323392	-6.07971e-05
60.5	0.000341775	0.000400366	0.000694027		60.5	0.00030707	8.27298e-06	-0.000402362		60.5	0.000212408	-0.000873889		60.5	-0.000308177	-0.000778759		60.5	-6.83648e-05	0.000213926	8.03463e-06		60.5	2.63004e-05	-0.000464947	0.000101702
61	0.000517831	0.000436457	-1.90643e-06		61	0.000335636	-0.000338176	-8.8798e-05		61	-0.000306028	0.00060458		61	9.16936e-05	-0.000457791		61	0.000197548	0.000314388	5.7681e-05		61	-2.69066e-05	9.14978e-05	0.000190701
61.5	0.000242886	0.000293548	0.00073216		61.5	0.000525201	-4.0625e-05	-0.000258234		61.5	0.000225536	-0.000301952		61.5	-0.000226436	0.000583177		61.5	0.00013496	0.000232349	-2.17265e-06		61.5	-8.01135e-05	-0.000601057	0.0008307
62	0.000569942	0.000329638	0.000215227		62	0.000392767	-0.000387074	-0.000105669		62	-0.000292901	-0.000475483		62	-0.000545566	-0.000533855		62	0.000254873	0.000588311	4.77237e-05		62	0.00016068	0.000212637	0.0008462
62.5	0.000294998	0.000186729	0.000591293		62.5	0.000582333	7.14769e-05	-0.000275105		62.5	0.000238663	0.000452986		62.5	0.000574304	-0.000571888		62.5	0.000447785	0.000360272	6.08701e-05		62.5	-0.000149777	-0.000186168	0.00116
63	0.000622054	0.00075882	0.00043236		63	0.000288898	-0.000435972	-0.000122541		63	7.02262e-05	-0.000270545		63	-0.000103826	-0.00060992		63	0.000385198	0.000460734	0.000110766		63	0.000385016	-0.000217223	0.000803448
63.5	0.00049811	0.000437911	0.000629426		63.5	0.000639464	-0.000138421	-0.000452977		63.5	0.00025179	0.000289923		63.5	0.000656045	-0.000287952		63.5	0.00050511	0.000488195	0.000196913		63.5	0.000221559	0.000265972	0.000341447
64	0.000976166	0.000831002	0.000827492		64	0.00050703	-0.00048487	-0.000139412		64	0.000258353	-6.6608e-05		64	-2.20852e-05	-0.000325984		64	0.000661522	0.000333156	0.000246559		64	0.000425602	-0.000353084	0.000246696
64.5	0.000851221	0.000510093	0.000667559		64.5	0.000857595	-0.000187319	-0.000469848		64.5	8.99168e-05	-0.000790139		64.5	0.000737785	-5.01568e-06		64.5	0.000562435	0.000433618	0.000332706		64.5	0.000629645	0.000460611	-0.000141805
65	0.00118	0.000725183	0.000865625		65	0.000725161	-0.000372768	-0.000317284		65	0.00062148	0.00013833		65	5.96553e-05	-4.30477e-05		65	0.000718847	0.000315079	0.000382352		65	0.000282438	-0.000195444	0.000461695
65.5	0.00121	0.000761274	0.000705692		65.5	0.00108	-7.52171e-05	-0.000486719		65.5	0.000278044	-0.000585202		65.5	-0.000259475	0.00027892		65.5	0.00087526	0.000525041	0.000505248		65.5	0.000780481	-7.99994e-05	0.000587444
66	0.00138	0.000975365	0.00126		66	0.0011	-0.000421666	-0.000334155		66	0.000809607	0.000159267		66	0.000141396	-0.000119112		66	0.000739672	0.000406502	0.000481895		66	0.000617024	7.24453e-05	0.00112
66.5	0.00156	0.000833456	0.000565825		66.5	0.00145	3.68849e-05	-0.000181591		66.5	0.000291171	0.000169736		66.5	-0.000177734	0.000921856		66.5	0.00101	0.000725963	0.000531791		66.5	0.000968067	-0.00036286	0.00106
67	0.00189	0.000511547	0.0013		67	0.00148	-0.000470564	-2.90265e-05		67	0.000997735	-0.000920796		67	0.000582136	-0.000554176		67	0.000979497	0.000680425	0.000471687		67	0.00103	0.000377335	0.000817441
67.5	0.00191	0.000905638	0.000781958		67.5	0.00167	-1.20132e-05	-0.000359462		67.5	0.000479298	0.000740673		67.5	0.000264006	-0.000592208		67.5	0.00080741	0.000671386	0.000448334		67.5	0.000898403	-0.00035197	0.000575691
68	0.00239	0.000762728	0.00134		68	0.0017	-0.000358462	0.000115102		68	0.000835862	-0.000165858		68	0.000663877	-0.00063024		68	0.00104	0.000698848	0.00035173		68	0.00125	5.74744e-05	7.69397e-05
68.5	0.00242	0.00116	0.000999091		68.5	0.00205	-6.09112e-05	-0.000376334		68.5	0.00119	0.000945611		68.5	0.000704747	-0.00139		68.5	0.000901235	0.000397809	0.000291626		68.5	0.00105	6.29191e-05	0.000312939
69	0.00274	0.00065591	0.0012		69	0.00208	-0.00040736	-6.27693e-05		69	0.000673989	0.000589079		69	0.00146	-0.000347304		69	0.000838647	0.00068077	0.000231773		69	0.00147	-0.000225386	0.000365188
69.5	0.00277	0.00105	0.000501224		69.5	0.00211	-0.000109809	-0.000393205		69.5	0.00121	-0.000501452		69.5	0.00115	-0.0011		69.5	0.00103	0.000489232	0.000135169		69.5	0.00149	0.000441309	0.000931687
70	0.0031	0.000907092	0.00195		70	0.00246	-0.000456258	-0.000240641		70	0.000862116	0.00116		70	0.00227	0.00101		70	0.000968972	0.000553193	0.000184815		70	0.0014	-0.000251247	0.00131
70.5	0.00327	0.00112	0.00215		70.5	0.00233	-0.000158707	-0.000410076		70.5	0.000868679	0.000253486		70.5	0.00159	-0.0004614		70.5	0.00105	0.000580655	0.000197962		70.5	0.00175	4.79482e-05	0.00151
71	0.00345	0.000979273	0.00306		71	0.00284	-0.000344156	-0.000257512		71	0.00123	0.000813954		71	0.00271	-0.000858432		71	0.00117	0.000352616	0.000284108		71	0.00152	5.33929e-05	0.00124
71.5	0.00363	0.00137	0.00504		71.5	0.00271	-0.000207605	-0.000265948		71.5	0.00106	0.000274423		71.5	0.00203	-0.00126		71.5	0.00129	0.000599078	0.000297255		71.5	0.00202	-0.000234912	0.000810184
72	0.00381	0.000872455	0.00345		72	0.00322	-0.000232054	-0.000274384		72	0.00141	0.000284892		72	0.00207	-0.000934496		72	0.00127	0.000407539	0.000346901		72	0.00207	0.000358282	0.000274433
72.5	0.00398	0.00127	0.00294		72.5	0.00308	-0.000256503	-0.000282819		72.5	0.00107	0.00103		72.5	0.00247	-0.00169		72.5	0.00146	0.0005445	0.000323547		72.5	0.0022	-0.000297523	6.94323e-05
73	0.00416	0.000944637	0.00242		73	0.00344	-0.000280952	-0.000291255		73	0.00178	0.000305829		73	0.00215	-0.00101		73	0.00147	0.000608462	0.000373444		73	0.00237	0.000111922	0.000599431
73.5	0.00434	0.00116	0.00226		73.5	0.00346	-0.000305401	-0.000138691		73.5	0.00126	0.000499298		73.5	0.00291	-0.000689592		73.5	0.00144	0.000416923	0.00038659		73.5	0.00213	8.06167e-05	0.000614931
74	0.00466	0.0012	0.00157		74	0.00381	-7.85027e-06	-0.000308126		74	0.00179	0.000693767		74	0.00259	-0.000727624		74	0.0016	0.000517385	0.000436486		74	0.00245	-0.000244439	0.00107
74.5	0.00484	0.00105	0.00176		74.5	0.00368	-0.000515299	-0.000155562		74.5	0.00145	-0.000396764		74.5	0.00371	0.000313344		74.5	0.00154	0.000325846	0.000413133		74.5	0.00221	0.000422256	0.000756179
75	0.00502	0.00145	0.00143		75	0.00419	-5.67483e-05	-0.000485998		75	0.00198	0.000897704		75	0.00303	-8.46885e-05		75	0.00162	0.000535807	0.000389529		75	0.00275	-0.000454049	0.000440928
75.5	0.00534	0.00113	0.00162		75.5	0.0039	-0.000403197	-0.000172434		75.5	0.00198	0.000358173		75.5	0.00451	-0.00012272		75.5	0.00178	0.000453769	0.000402675		75.5	0.00273	0.000139146	0.000309427
76	0.00537	0.00152	0.00129		76	0.00441	5.53537e-05	-0.000341869		76	0.00182	0.000368642		76	0.00419	-0.000519753		76	0.00168	0.00059073	0.000342572		76	0.00304	-3.91595e-05	6.76765e-05
76.5	0.0057	0.00102	0.00184		76.5	0.00428	-0.000291095	-2.83049e-05		76.5	0.00217	0.000562111		76.5	0.00459	-0.000198785		76.5	0.00176	0.000654692	0.000392218		76.5	0.00325	-0.000327465	0.000560926
77	0.00588	0.00141	0.00132		77	0.00479	-0.000476544	-0.000197741		77	0.00183	0.000205579		77	0.00428	-0.00131		77	0.00184	0.000536153	0.000295865		77	0.00297	0.00033948	0.000686675
77.5	0.0062	0.00109	0.00152		77.5	0.00466	-0.000339993	-4.51763e-05		77.5	0.00219	0.00113		77.5	0.00432	-0.000633849		77.5	0.0016	0.000636615	0.000309011		77.5	0.00355	-0.000647075	0.00118
78	0.00623	0.00131	0.001		78	0.00501	-0.000364442	-0.000375612		78	0.00219	0.000226517		78	0.00436	-0.00247		78	0.00187	0.000518076	0.000212657		78	0.0032	0.00020337	0.000974923
78.5	0.00656	0.00134	0.00156		78.5	0.00488	-0.000227891	-6.20478e-05		78.5	0.00202	0.00115		78.5	0.0044	-0.000709913		78.5	0.0018	0.000655037	0.000225804		78.5	0.00366	-8.51857e-05	0.000806672
79	0.00673	0.00138	0.00122		79	0.00555	-0.00025234	-0.000392483		79	0.00238	0.000798454		79	0.0048	-0.00147		79	0.0017	0.000645999	0.00023895		79	0.00364	-0.000189991	0.000454672
79.5	0.00706	0.00124	0.00142		79.5	0.00526	-0.000276789	8.20808e-05		79.5	0.00221	7.49231e-05		79.5	0.0052	-6.69768e-05		79.5	0.0019	0.00060046	0.000215596		79.5	0.00348	0.000550204	0.000139421
80	0.00709	0.00163	0.00126		80	0.00577	-0.000301238	-0.000570355		80	0.00257	0.00119		80	0.00488	-0.000465009		80	0.0018	0.000700922	0.000228743		80	0.00387	-0.000436351	0.00037542
80.5	0.00726	0.00149	0.0011		80.5	0.00547	-0.000325687	6.52094e-05		80.5	0.0024	0.000462861		80.5	0.00528	-0.000143041		80.5	0.00174	0.000545883	0.000132389		80.5	0.00359	0.000414093	0.000280669
81	0.00759	0.00134	0.00112		81	0.00615	-0.000189136	-0.000426226		81	0.00276	0.00102		81	0.00568	-0.000900073		81	0.00193	0.000755844	0.000182035		81	0.00409	1.52881e-05	0.000847418
81.5	0.00762	0.00138	0.000958819		81.5	0.00585	-0.000213585	4.8338e-05		81.5	0.00276	0.00122		81.5	0.00572	-0.0013		81.5	0.0019	0.000819806	0.000122182		81.5	0.00404	-0.000199517	0.000862918
82	0.0081	0.00124	0.00169		82	0.00653	-7.70344e-05	-0.000443098		82	0.00259	-0.000239733		82	0.00684	-0.000976137		82	0.00177	0.000920267	0.000208328		82	0.00402	0.000357178	0.000951917
82.5	0.00797	0.00163	0.000817952		82.5	0.00607	-0.000423483	3.14666e-05		82.5	0.00295	0.00142		82.5	0.00616	-0.00137		82.5	0.002	0.000947729	0.000184975		82.5	0.00423	-0.000482378	0.000746916
83	0.0083	0.00131	0.00137		83	0.00674	3.50676e-05	-0.000459969		83	0.00243	0.000331204		83	0.00656	-0.000333201		83	0.0019	0.00064669	0.000161621		83	0.00403	0.000331317	0.000284665
83.5	0.00848	0.0017	0.00121		83.5	0.00629	-0.000311381	1.45952e-05		83.5	0.00279	0.00199		83.5	0.00589	-0.00109		83.5	0.00198	0.000893152	0.000138267		83.5	0.00438	-3.07382e-05	0.000263414
84	0.00865	0.00156	0.00123		84	0.00696	0.00014717	-0.000315841		84	0.00245	0.000169142		84	0.00629	0.019		84	0.00217	0.000665113	0.000114914		84	0.00436	-0.000209043	0.000242163
84.5	0.00868	0.00177	0.00143		84.5	0.00699	-0.000199279	-2.27626e-06		84.5	0.00263	0.00128		84.5	0.00597	0.00494		84.5	0.00226	0.000948074	0.00012806		84.5	0.00464	0.000384151	0.000772163
85	0.00931	0.00145	0.00109		85	0.00734	9.82715e-05	-0.000332712		85	0.00263	0.000557079		85	0.00601	0.00131		85	0.00227	0.000939036	6.82063e-05		85	0.00466	-0.000418654	0.000640662
85.5	0.00918	0.00167	0.00147		85.5	0.00721	-0.000248177	-0.000180148		85.5	0.00264	0.000383548		85.5	0.00605	-0.000883361		85.5	0.00246	0.000674497	0.000117853		85.5	0.00486	0.000431791	0.000509161
86	0.00966	0.00135	0.00113		86	0.00756	-0.000111627	-0.000188583		86	0.00317	0.00113		86	0.00681	-0.00164		86	0.00251	0.000920959	-1.5001e-05		86	0.00492	3.29856e-05	0.00030416
86.5	0.00954	0.00174	0.00115		86.5	0.00759	-0.000458076	-3.60191e-05		86.5	0.00283	0.000404485		86.5	0.00649	-0.00204		86.5	0.00252	0.00065642	3.46454e-05		86.5	0.00494	-0.00014507	-8.45907e-05
87	0.01001	0.00142	0.00117		87	0.00794	4.75479e-07	-0.000366455		87	0.00336	0.000598954		87	0.00689	-0.00244		87	0.00275	0.000793381	-2.52082e-05		87	0.005	0.000484875	0.000592408
87.5	0.00989	0.00146	0.00154		87.5	0.0078	-0.000345974	-5.28905e-05		87.5	0.00284	0.000609423		87.5	0.00729	-0.00211		87.5	0.00265	0.000820843	2.44381e-05		87.5	0.00502	-0.00031793	0.000754908
88	0.01037	0.00131	0.00103		88	0.00832	-4.84225e-05	-0.000222326		88	0.0032	6.88917e-05		88	0.00733	-0.00251		88	0.00277	0.000592554	3.75845e-05		88	0.00511	0.000606015	0.0011
88.5	0.01039	0.00135	0.0014		88.5	0.00818	-0.000394872	-0.000230762		88.5	0.00338	0.00099736		88.5	0.00773	-0.000751553		88.5	0.00289	0.000620016	1.42309e-05		88.5	0.00502	6.02094e-05	0.000969656
89	0.01072	0.00156	0.000887817		89	0.00821	6.36794e-05	-7.81976e-05		89	0.00304	0.000456829		89	0.00741	-0.00223		89	0.00286	0.000428227	-9.12279e-06		89	0.00559	-0.000191346	0.000433905
89.5	0.0109	0.00142	0.00162		89.5	0.00856	-0.00028277	-0.000247633		89.5	0.00339	0.00102		89.5	0.00817	-0.000827618		89.5	0.00291	0.000601689	-0.000105476		89.5	0.0055	0.000218349	0.000265654
90	0.01108	0.00146	0.00092595		90	0.00843	1.47814e-05	6.5931e-05		90	0.00305	0.000844767		90	0.0075	-0.00194		90	0.00307	0.0007024	-9.23301e-05		90	0.00593	-0.000584456	-1.28465e-05
90.5	0.0111	0.00149	0.00112		90.5	0.00878	-0.000170668	-0.000425505		90.5	0.00341	0.000305235		90.5	0.0079	-0.000903682		90.5	0.00282	0.000766361	-0.000225184		90.5	0.00609	0.000265988	0.000296653
91	0.01128	0.00171	0.000964083		91	0.00865	-3.41166e-05	4.90595e-05		91	0.00324	0.000865704		91	0.00686	-0.00202		91	0.0029	0.000830323	-0.000175537		91	0.00582	-0.000279817	0.000569402
91.5	0.01146	0.00157	0.00116		91.5	0.009	-0.000219566	-0.000442376		91.5	0.00359	0.000142173		91.5	0.00762	-0.00242		91.5	0.00291	0.000529034	-0.000271891		91.5	0.00624	-5.4122e-05	0.000842151
92	0.01163	0.00178	0.00118		92	0.00887	-0.000244015	3.21881e-05		92	0.00343	0.00144		92	0.00838	-0.00317		92	0.0026	0.000775496	-0.000295245		92	0.00601	0.000392323	0.00071065
92.5	0.01211	0.00146	0.000842282		92.5	0.00922	-0.000268464	-0.000459248		92.5	0.00343	0.00034711		92.5	0.00806	-0.00249		92.5	0.00283	0.000583707	-0.000355098		92.5	0.00621	3.05175e-05	0.000468899
93	0.01199	0.00185	0.00122		93	0.00925	-0.000292913	1.53167e-05		93	0.00361	0.00109		93	0.00846	-0.00253		93	0.00273	0.000793918	-0.000487952		93	0.00631	0.000844212	0.000153649
93.5	0.01231	0.00135	0.000880415		93.5	0.00944	-0.000156362	-0.000315119		93.5	0.00327	0.000551048		93.5	0.00886	-0.00185		93.5	0.00263	0.00082138	-0.000547806		93.5	0.00592	0.000151657	-5.13522e-05
94	0.01219	0.00193	0.00126		94	0.00946	-0.000341811	-0.000162555		94	0.0038	0.000194517		94	0.0089	-0.00189		94	0.00282	0.000520091	-0.000680659		94	0.00642	0.000377352	0.000184647
94.5	0.01267	0.0016	0.000739548		94.5	0.00981	-0.00020526	-0.00033199		94.5	0.00328	0.000938985		94.5	0.00894	-0.00121		94.5	0.00279	0.000803303	-0.000631013		94.5	0.00611	0.000346047	0.000457396
95	0.01269	0.00164	0.00129		95	0.00968	-0.000551709	-0.000179426		95	0.00399	0.000215454		95	0.00898	-0.00125		95	0.00269	0.000575014	-0.000617866		95	0.00639	5.77413e-05	0.000877145
95.5	0.01317	0.00168	0.000956681		95.5	0.01003	-0.000254158	-0.000187862		95.5	0.00347	0.00133		95.5	0.00902	-0.002		95.5	0.00296	0.000712226	-0.00053172		95.5	0.00644	0.000687686	0.000819144
96	0.0129	0.00171	0.000975748		96	0.01006	-0.000278607	-3.52975e-05		96	0.00383	0.000236392		96	0.00835	-0.00132		96	0.0029	0.000703187	-0.000518574		96	0.00602	-4.86922e-06	0.000871394
96.5	0.01337	0.00175	0.000458814		96.5	0.01041	-0.000303056	-0.000365733		96.5	0.00401	0.00098086		96.5	0.00911	-0.00208		96.5	0.00291	0.000474898	-0.000432427		96.5	0.00663	0.000367826	0.000519393
97	0.01325	0.00143	0.00101		97	0.01044	-0.000488505	-5.21689e-05		97	0.00367	0.000441329		97	0.00735	-0.0014		97	0.0031	0.00072161	-0.000455781		97	0.00632	0.00041002	0.000240892
97.5	0.01388	0.00182	0.000675947		97.5	0.01063	-0.000190954	-0.000221605		97.5	0.00402	-0.000282202		97.5	0.00955	-0.00252		97.5	0.00311	0.000493321	-0.000406135		97.5	0.00686	0.000195215	0.000219641
98	0.01375	0.00132	0.000695013		98	0.0105	-0.000537403	-0.00023004		98	0.00368	0.000462267		98	0.00887	-0.00255		98	0.0032	0.000667033	-0.000392988		98	0.00691	0.00086191	0.00023514
98.5	0.01408	0.00171	0.00071408		98.5	0.01069	-0.000239852	-0.000238476		98.5	0.00386	-0.000261265		98.5	0.00927	-0.00187		98.5	0.00339	0.000803994	-0.000489342		98.5	0.00671	9.58546e-05	0.00069164
99	0.01411	0.00121	0.000376146		99	0.01055	-0.000586301	-0.000246912		99	0.00404	0.000850204		99	0.00967	-0.00263		99	0.00347	0.000539205	-0.000439696		99	0.00717	0.000395049	0.000964389
99.5	0.01444	0.00179	0.00111		99.5	0.01107	-0.00012775	-9.43475e-05		99.5	0.0037	-5.73272e-05		99.5	0.01007	-0.000869258		99.5	0.00334	0.000931917	-0.000609049		99.5	0.00683	0.000363744	0.00131
100	0.01461	0.00129	0.000592279		100	0.01077	-0.000635199	-0.000102783		100	0.00423	0.000137142		100	0.00975	-0.00127		100	0.00353	0.000667128	-0.000595903		100	0.00747	7.54388e-05	0.000885137
100.5	0.01494	0.00168	0.000968346		100.5	0.01128	-1.56478e-05	4.97811e-05		100.5	0.00371	0.00033061		100.5	0.01051	-0.00274		100.5	0.00336	0.00080434	-0.000692256		100.5	0.00734	0.000815634	0.000643386
101	0.01482	0.00154	0.000630412		101	0.01099	-0.000684097	-0.000280655		101	0.00442	-0.000208921		101	0.01019	-0.00134		101	0.0034	0.000868301	-0.00075211		101	0.00755	8.63284e-05	0.000254635
101.5	0.01514	0.00175	0.00101		101.5	0.01134	-0.000225546	-0.00012809		101.5	0.0039	0.000902548		101.5	0.01023	-0.00354		101.5	0.00356	0.000749513	-0.000775464		101.5	0.00757	0.000495773	0.000196635
102	0.01517	0.00161	0.000847545		102	0.01121	-0.000571995	-0.000297526		102	0.00426	0.000546016		102	0.01099	-0.00214		102	0.00346	0.000995974	-0.000798817		102	0.0073	0.000390968	0.000873634
102.5	0.0155	0.00164	0.000866612		102.5	0.01156	-0.000274444	1.60383e-05		102.5	0.00409	-0.000544515		102.5	0.00995	-0.00361		102.5	0.00351	0.000767685	-0.000822171		102.5	0.00772	2.91626e-05	0.000705383
103	0.01567	0.00168	0.00106		103	0.01143	-0.000620893	-0.000314397		103	0.00427	0.00112		103	0.01071	-0.00293		103	0.00363	0.000941397	-0.000882025		103	0.00734	0.000769357	0.000904632
103.5	0.0157	0.00154	0.000725745		103.5	0.01178	-0.000162342	-8.3315e-07		103.5	0.00445	-0.000340577		103.5	0.01004	-0.00261		103.5	0.00342	0.000968858	-0.000905378		103.5	0.00783	-0.000143698	0.000479131
104	0.01588	0.00193	0.000923811		104	0.01165	-0.000508791	-0.000492269		104	0.00411	0.000403891		104	0.0108	-0.00301		104	0.0035	0.00095982	-0.001		104	0.00771	0.000522997	0.00016388
104.5	0.01605	0.00143	0.000763878		104.5	0.012	-0.00037224	-1.77046e-05		104.5	0.00464	0.00023136		104.5	0.01012	-0.00269		104.5	0.00355	0.00102	-0.000952086		104.5	0.00762	0.000271192	0.00058363
105	0.01623	0.002	0.000961944		105	0.01186	-0.000557689	-0.00050914		105	0.00412	-0.000309171		105	0.01088	-0.00237		105	0.0033	0.000831992	-0.00101		105	0.00797	1.96364e-05	0.000819629
105.5	0.01626	0.00133	0.000802011		105.5	0.01237	-0.000421138	-3.4576e-05		105.5	0.00465	0.000435298		105.5	0.01056	-0.00204		105.5	0.00357	0.000932704	-0.000925793		105.5	0.00769	0.000760081	0.00142
106	0.01658	0.0019	0.001		106	0.01224	-0.000767587	-0.000526012		106	0.00431	-0.000104234		106	0.01132	-0.00208		106	0.00347	0.000923665	-0.000949147		106	0.00808	-0.000263224	0.00114
106.5	0.01661	0.0014	0.0012		106.5	0.01259	-0.000470036	-5.14474e-05		106.5	0.00449	0.000823235		106.5	0.011	-0.00248		106.5	0.00337	0.000987627	-0.000936		106.5	0.00807	0.000587221	0.000976376
107	0.01694	0.00161	0.00122		107	0.01246	-0.000816485	-0.000542883		107	0.00485	-0.000267296		107	0.01104	-0.00288		107	0.00353	0.00102	-0.000959354		107	0.0079	0.000151665	0.000367126
107.5	0.01711	0.00147	0.00106		107.5	0.01265	-0.000518934	-6.83188e-05		107.5	0.00433	-0.000622827		107.5	0.01108	-0.00256		107.5	0.00347	0.0006773	-0.000982707		107.5	0.00822	1.01102e-05	-2.16253e-05
108	0.01729	0.00151	0.00125		108	0.01252	-0.000704383	-0.000559755		108	0.00486	0.000120641		108	0.01112	-0.00403		108	0.00337	0.000924011	-0.000969561		108	0.00798	0.000677055	0.000214374
108.5	0.01732	0.00136	0.00091641		108.5	0.01303	-0.000567832	-8.51902e-05		108.5	0.00452	-0.00041889		108.5	0.01188	-0.00299		108.5	0.0036	0.000768972	-0.00103		108.5	0.00837	-0.00027275	0.000303373
109	0.01765	0.00158	0.00129		109	0.01273	-0.000592281	-0.000576626		109	0.0047	-0.000225421		109	0.01049	-0.00339		109	0.0035	0.000978934	-0.000979768		109	0.00842	0.000651194	0.000870122
109.5	0.01767	0.00144	0.000954543		109.5	0.01325	-0.00045573	-0.000102062		109.5	0.00471	0.000519048		109.5	0.01197	-0.00271		109.5	0.00347	0.00101	-0.00104		109.5	0.00841	0.000178889	0.000554871
110	0.018	0.00165	0.000973609		110	0.01295	-0.000641179	-0.000432497		110	0.00454	-0.000937484		110	0.01093	-0.00167		110	0.00363	0.000705107	-0.00103		110	0.00861	5.83991e-07	0.000533621
110.5	0.01802	0.00133	0.000814676		110.5	0.01346	-0.000826628	-0.000118933		110.5	0.00507	0.00109		110.5	0.01169	-0.00207		110.5	0.00357	0.000805568	-0.00109		110.5	0.0083	0.000630779	0.00021837
111	0.0182	0.00154	0.00119		111	0.01317	-0.000529077	-0.000610369		111	0.00455	-0.000549546		111	0.01173	-0.0021		111	0.00361	0.000541029	-0.00104		111	0.00876	-0.000208776	5.0119e-05
111.5	0.01823	0.0014	0.000852809		111.5	0.01368	-0.00104	-0.000296804		111.5	0.00526	0.000927923		111.5	0.01177	-0.00286		111.5	0.00373	0.000714491	-0.00117		111.5	0.0086	0.000604918	0.000837368
112	0.01856	0.00144	0.00105		112	0.01339	-0.000577975	-0.00046624		112	0.00474	-0.000528609		112	0.01253	-0.0029		112	0.00382	0.000741952	-0.00116		112	0.0088	0.000206113	0.000705867
112.5	0.01873	0.00147	0.00107		112.5	0.01406	-0.00109	-0.000313676		112.5	0.0051	-0.00051814		112.5	0.01257	-0.00366		112.5	0.00375	0.000732914	-0.000997244		112.5	0.0089	-8.24422e-05	0.00113
113	0.01891	0.00151	0.000910008		113	0.01361	-0.000465873	-0.000483112		113	0.0051	-0.000141671		113	0.01297	-0.00369		113	0.00398	0.000796875	-0.000984097		113	0.00844	0.000474003	0.000663366
113.5	0.01893	0.00172	0.000929075		113.5	0.01412	-0.00113	-0.000491547		113.5	0.00493	-0.000131202		113.5	0.01229	-0.00337		113.5	0.00392	0.000641837	-0.000934451		113.5	0.00894	-0.000255303	0.000127615
114	0.01911	0.00123	0.000948141		114	0.01366	-0.000675771	-0.000177983		114	0.00529	0.000246266		114	0.01305	-0.00341		114	0.004	0.000778798	-0.000921305		114	0.00863	0.000631892	3.2864e-05
114.5	0.01929	0.00162	0.00132		114.5	0.01418	-0.00118	-0.000508419		114.5	0.00477	-0.000293265		114.5	0.01237	-0.00309		114.5	0.0042	0.000806259	-0.00109		114.5	0.00905	0.000159587	-0.000282387
115	0.01931	0.00148	0.000807274		115	0.01388	-0.000563669	-0.000194854		115	0.0053	-0.0012		115	0.01313	-0.00241		115	0.0041	0.000870221	-0.00111		115	0.00915	-1.84684e-05	0.000321112
115.5	0.01964	0.00169	0.00118		115.5	0.01456	-0.00107	-0.00068629		115.5	0.00478	0.000461673		115.5	0.01246	-0.00281		115.5	0.00414	0.000934182	-0.00106		115.5	0.00876	0.000501476	0.000520362
116	0.01967	0.00119	0.000666407		116	0.0141	-0.000773567	-0.000372726		116	0.00514	-0.000261859		116	0.01286	-0.00248		116	0.00426	0.000633144	-0.00109		116	0.00922	-0.000264579	0.00105
116.5	0.02	0.00158	0.00104		116.5	0.01461	-0.00112	-0.000381162		116.5	0.0048	-0.00080139		116.5	0.01254	-0.00324		116.5	0.00406	0.000879605	-0.00107		116.5	0.0088	0.000659366	0.00088211
117	0.02002	0.00126	0.00070454		117	0.01432	-0.000661465	-0.000228597		117	0.00498	0.000493079		117	0.01294	-0.00292		117	0.00418	0.000724566	-0.00113		117	0.0093	4.00606e-05	0.000677109
117.5	0.02035	0.00148	0.00108		117.5	0.01483	-0.00117	-0.000559033		117.5	0.00534	-0.000964453		117.5	0.01262	-0.00404		117.5	0.00426	0.000898028	-0.00105		117.5	0.00928	-2.79946e-05	0.000361858
118	0.02023	0.00133	0.000921673		118	0.0147	-0.000871363	-0.000245469		118	0.00482	0.000514016		118	0.01338	-0.00371		118	0.00398	0.000888989	-0.00114		118	0.00916	0.00027145	4.66075e-05
118.5	0.02055	0.00137	0.00112		118.5	0.01505	-0.00122	-0.000575904		118.5	0.00535	-0.000209515		118.5	0.0127	-0.00375		118.5	0.00424	0.000551451	-0.00106		118.5	0.00951	-0.000457855	0.000209107
119	0.02073	0.00123	0.000780806		119	0.01476	-0.000920261	-0.00010134		119	0.00518	-0.000933046		119	0.01274	-0.00379		119	0.00411	0.000870912	-0.00115		119	0.00909	0.00035584	0.000151106
119.5	0.02091	0.00144	0.000799872		119.5	0.01543	-0.00127	-0.000753776		119.5	0.00554	0.000178422		119.5	0.01278	-0.00347		119.5	0.00401	0.000679374	-0.00121		119.5	0.00962	-0.000263466	0.000717855
120	0.02093	0.00148	0.000997939		120	0.01497	-0.000969159	-0.000118212		120	0.00537	-0.000545109		120	0.01318	-0.00351		120	0.00416	0.000925835	-0.0012		120	0.0095	-3.75209e-05	0.000696604
120.5	0.02126	0.00169	0.000838005		120.5	0.01565	-0.00132	-0.000770647		120.5	0.00555	-0.00071764		120.5	0.01322	-0.00247		120.5	0.00407	0.000953296	-0.0013		120.5	0.00941	0.000298674	0.000859103
121	0.02144	0.00155	0.000857072		121	0.01551	-0.00118	-0.000135083		121	0.00556	2.58287e-05		121	0.01362	-0.00394		121	0.00393	0.000761758	-0.00125		121	0.00965	-6.31313e-05	0.000580603
121.5	0.02161	0.00159	0.000876138		121.5	0.0157	-0.0012	-0.000626519		121.5	0.00539	-0.000329703		121.5	0.01366	-0.00362		121.5	0.00412	0.000898719	-0.00138		121.5	0.00923	0.000640563	8.16017e-05
122	0.02179	0.00162	0.00125		122	0.01557	-0.00123	-0.000312954		122	0.00574	-0.000870234		122	0.01335	-0.00438		122	0.00406	0.000780181	-0.00133		122	0.00958	-1.54918e-05	-4.98991e-05
122.5	0.02197	0.00148	0.000736271		122.5	0.01592	-0.00109	-0.00080439		122.5	0.00523	0.000241235		122.5	0.01447	-0.00442		122.5	0.004	0.000844142	-0.00139		122.5	0.00949	0.000247203	-0.00029165
123	0.02214	0.00152	0.000933338		123	0.01579	-0.00128	-0.000490826		123	0.00576	-0.00122		123	0.01343	-0.00302		123	0.00423	0.000871603	-0.00134		123	0.0098	0.000326148	0.000128099
123.5	0.02232	0.0012	0.000774404		123.5	0.01598	-0.00114	-0.000660261		123.5	0.00524	0.000629172		123.5	0.01419	-0.00377		123.5	0.00409	0.000789565	-0.00137		123.5	0.00982	3.75924e-05	0.000364098
124	0.0225	0.00141	0.00115		124	0.01601	-0.00133	-0.000507697		124	0.0056	-0.000277359		124	0.01351	-0.00309		124	0.0041	0.000926526	-0.00135		124	0.00991	0.000704537	0.000783848
124.5	0.02252	0.00127	0.000990537		124.5	0.0162	-0.00119	-0.000677133		124.5	0.00525	-0.001		124.5	0.01427	-0.00313		124.5	0.00419	0.000807988	-0.00138		124.5	0.00997	8.5232e-05	0.000725847
125	0.0227	0.0013	0.00101		125	0.01623	-0.00121	-0.000524569		125	0.00543	-7.34214e-05		125	0.01359	-0.00353		125	0.00423	0.000981449	-0.00136		125	0.00973	0.000421177	0.000520846
125.5	0.02273	0.00116	0.00067167		125.5	0.01658	-0.0014	-0.000855004		125.5	0.00544	-0.000796953		125.5	0.01399	-0.00321		125.5	0.00421	0.000972411	-0.00135		125.5	0.01023	0.000389871	0.000168845
126	0.02305	0.00138	0.000869737		126	0.0166	-0.00142	-0.00038044		126	0.00527	0.000130516		126	0.01403	-0.00288		126	0.0044	0.00107	-0.00145		126	0.01	2.78162e-05	-0.000293406
126.5	0.02308	0.00123	0.000709803		126.5	0.01679	-0.00145	-0.000871876		126.5	0.00563	-0.000409015		126.5	0.01371	-0.00364		126.5	0.00445	0.00106	-0.0014		126.5	0.01035	0.000658011	-0.000241157
127	0.02326	0.00127	0.00090787		127	0.01666	-0.00163	-0.000558311		127	0.00564	-0.000948546		127	0.01447	-0.00368		127	0.00446	0.000945295	-0.00149		127	0.0104	-0.000108044	-0.000225657
127.5	0.02313	0.00113	0.000747936		127.5	0.01685	-0.00101	-0.000888747		127.5	0.00582	-2.10777e-05		127.5	0.0138	-0.00444		127.5	0.00469	0.00119	-0.00141		127.5	0.01013	0.000228151	0.000230842
128	0.02361	0.00116	0.000767003		128	0.01704	-0.00168	-0.000575183		128	0.00547	-0.000560609		128	0.01456	-0.00448		128	0.00459	0.000890718	-0.00147		128	0.01059	0.000160095	0.000503591
128.5	0.02364	0.00102	0.000965069		128.5	0.01691	-0.00122	-0.000744619		128.5	0.00566	-0.00055014		128.5	0.01388	-0.00487		128.5	0.00463	0.00117	-0.00153		128.5	0.01039	-0.00031221	0.00066609
129	0.02366	0.00106	0.000448136		129	0.01726	-0.00157	-0.000753054		129	0.00584	-0.000172671		129	0.01536	-0.00635		129	0.00468	0.00106	-0.00159		129	0.01056	0.000427985	0.000424589
129.5	0.02399	0.00109	0.001		129.5	0.01713	-0.00127	-0.00076149		129.5	0.00567	-0.00108		129.5	0.01432	-0.00315		129.5	0.00458	0.00101	-0.00172		129.5	0.01062	-0.00030157	7.25885e-05
130	0.02417	0.000950992	0.000486269		130	0.01748	-0.00162	-0.000769926		130	0.00585	0.000581266		130	0.01544	-0.00211		130	0.00456	0.00104	-0.00167		130	0.01027	0.000328374	-0.000352662
130.5	0.02434	0.000987083	0.00104		130.5	0.01734	-0.00132	-0.000778361		130.5	0.00551	-0.00106		130.5	0.01404	-0.00395		130.5	0.00464	0.000882025	-0.00169		130.5	0.01051	0.000333819	-0.000410663
131	0.02452	0.000844174	0.000524402		131	0.01769	-0.00167	-0.000947797		131	0.00604	-0.0016		131	0.0148	-0.00327		131	0.00439	0.00116	-0.00164		131	0.01027	-6.47362e-05	-2.79139e-05
131.5	0.02455	0.00106	0.000721468		131.5	0.01756	-0.00137	-0.000795233		131.5	0.00534	-0.000120328		131.5	0.01412	-0.00366		131.5	0.00444	0.000973448	-0.00163		131.5	0.01059	0.000712459	0.000244835
132	0.02487	0.000916355	0.000562534		132	0.01775	-0.00156	-0.000964668		132	0.00605	-0.000843859		132	0.01452	-0.00442		132	0.00449	0.00111	-0.00162		132	0.01057	-0.000274097	0.000590834
132.5	0.0249	0.00113	0.000938601		132.5	0.01778	-0.00142	-0.000973104		132.5	0.00553	8.36098e-05		132.5	0.01456	-0.00374		132.5	0.00428	0.0011	-0.00164		132.5	0.01048	0.000429348	0.000239084
133	0.02508	0.00117	0.000600667		133	0.01797	-0.0016	-0.00114		133	0.00589	-0.00101		133	0.01425	-0.00486		133	0.00454	0.000800332	-0.00163		133	0.01079	6.72928e-05	-3.94172e-05
133.5	0.02525	0.00138	0.000440734		133.5	0.018	-0.00147	-0.000667976		133.5	0.0059	-0.00155		133.5	0.01501	-0.00417		133.5	0.00452	0.000973793	-0.00161		133.5	0.01048	-0.000258012	-0.000391418
134	0.02558	0.00106	0.0006388		134	0.01819	-0.00149	-0.00116		134	0.00573	-0.000434984		134	0.01469	-0.00565		134	0.00442	0.000745755	-0.0016		134	0.01095	0.000445682	-0.000339169
134.5	0.02576	0.00091881	0.000478867		134.5	0.01805	-0.00136	-0.000845847		134.5	0.00608	-0.000791515		134.5	0.01545	-0.00461		134.5	0.00458	0.000809716	-0.00155		134.5	0.01093	-0.000540873	0.00011708
135	0.02579	0.00131	0.00103		135	0.01824	-0.00186	-0.00118		135	0.00574	-0.000965047		135	0.01477	-0.00537		135	0.00455	0.000873677	-0.00154		135	0.01124	0.000493322	-1.41705e-05
135.5	0.02611	0.000811991	0.000338		135.5	0.01827	-0.00157	-0.000862718		135.5	0.00627	-0.000403578		135.5	0.01553	-0.00469		135.5	0.00441	0.000645639	-0.00145		135.5	0.0113	0.000241517	-3.51713e-05
136	0.02614	0.00121	0.000715066		136	0.01846	-0.00175	-0.00119		136	0.00575	-0.00131		136	0.01521	-0.00508		136	0.00461	0.0009286	-0.00151		136	0.01114	0.000210211	-0.000423672
136.5	0.02647	0.000884173	0.000734133		136.5	0.01865	-0.00161	-0.00104		136.5	0.00646	-0.00038264		136.5	0.01597	-0.00476		136.5	0.00451	0.000700562	-0.00142		136.5	0.01127	0.00106	-0.000665423
137	0.02634	0.00128	0.000931199		137	0.01836	-0.0018	-0.00121		137	0.00629	-0.00111		137	0.01529	-0.00444		137	0.00448	0.000910523	-0.00156		137	0.01081	0.000368101	-0.000503174
137.5	0.02667	0.00114	0.000414266		137.5	0.01855	-0.00166	-0.00122		137.5	0.00577	-0.00183		137.5	0.01605	-0.00448		137.5	0.00468	0.000974485	-0.00162		137.5	0.01134	0.00107	-0.000267425
138	0.0267	0.00117	0.000791332		138	0.0189	-0.00169	-0.00123		138	0.0063	-0.000168234		138	0.01501	-0.00416		138	0.00472	0.000928946	-0.00171		138	0.01114	0.00059924	5.07455e-06
138.5	0.02702	0.000671536	0.000452399		138.5	0.01877	-0.00171	-0.000913333		138.5	0.00579	-0.00144		138.5	0.01577	-0.00491		138.5	0.00473	0.00128	-0.00181		138.5	0.01131	0.000127185	-0.000236426
139	0.0272	0.00124	0.00119		139	0.01912	-0.00158	-0.00124		139	0.00649	-0.000330297		139	0.01546	-0.00423		139	0.00485	0.00102	-0.00183		139	0.01144	0.00035313	-0.000367677
139.5	0.02753	0.000743718	0.000490532		139.5	0.01882	-0.00176	-0.000930204		139.5	0.00597	-0.00105		139.5	0.01514	-0.00463		139.5	0.00486	0.00119	-0.00193		139.5	0.01102	-0.000302675	-0.000719428
140	0.0274	0.00114	0.00122		140	0.01917	-0.00163	-0.00126		140	0.00633	-0.00159		140	0.0159	-0.00683		140	0.0048	0.00115	-0.00192		140	0.01159	0.000254019	-0.000777429
140.5	0.02773	0.0008159	0.000707665		140.5	0.01904	-0.00197	-0.000786076		140.5	0.00651	-0.00103		140.5	0.01594	-0.00543		140.5	0.00503	0.000993253	-0.00198		140.5	0.01136	-0.000108036	-0.00039468
141	0.02776	0.00103	0.00126		141	0.01939	-0.00167	-0.00128		141	0.00617	-0.00121		141	0.0167	-0.00582		141	0.00497	0.000984214	-0.00193		141	0.0116	-0.000249591	-0.00019568
141.5	0.02793	0.00107	0.000566798		141.5	0.01926	-0.00202	-0.000963947		141.5	0.0067	-0.00193		141.5	0.01638	-0.00622		141.5	0.00505	0.000756176	-0.00191		141.5	0.01158	-0.000280896	4.00688e-05
142	0.02811	0.000745172	0.000943864		142	0.01945	-0.00156	-0.00129		142	0.00618	-0.001		142	0.01678	-0.0059		142	0.00517	0.000856637	-0.00179		142	0.01123	-0.000789952	-0.000348432
142.5	0.02829	0.00114	0.00114		142.5	0.01932	-0.00207	-0.000980818		142.5	0.00671	-0.00191		142.5	0.01646	-0.00594		142.5	0.00507	0.000847599	-0.00171		142.5	0.01158	-8.62568e-05	-0.000553183
143	0.02831	0.000817354	0.000981997		143	0.01967	-0.00161	-0.00131		143	0.0062	-0.000613547		143	0.01722	-0.00598		143	0.00512	0.00091156	-0.00166		143	0.01135	-0.000668812	-0.000868184
143.5	0.02864	0.00121	0.00136		143.5	0.01953	-0.00212	-0.00099769		143.5	0.00638	-0.00152		143.5	0.01618	-0.00637		143.5	0.00524	0.000975522	-0.00168		143.5	0.01181	-0.000222367	-0.000852685
144	0.02867	0.00107	0.00084113		144	0.01972	-0.00182	-0.00117		144	0.00638	-0.00188		144	0.01658	-0.00605		144	0.00503	0.000674483	-0.0017		144	0.01172	-0.000400673	-0.000359685
144.5	0.02884	0.000925626	0.00104		144.5	0.01975	-0.00233	-0.00118		144.5	0.00639	-0.00094914		144.5	0.01626	-0.00645		144.5	0.00519	0.000920944	-0.00184		144.5	0.01163	-0.000836228	-0.000123936
145	0.02917	0.000782717	0.000700263		145	0.01994	-0.00187	-0.00118		145	0.00675	-0.00222		145	0.01666	-0.00541		145	0.0052	0.000802406	-0.0019		145	0.01194	-0.000242783	0.000332313
145.5	0.02905	0.000997808	0.00089833		145.5	0.01981	-0.00238	-0.00119		145.5	0.00623	-0.00148		145.5	0.01671	-0.00581		145.5	0.00502	0.000939367	-0.00199		145.5	0.01167	-0.00105	-1.94378e-05
146	0.02952	0.000854899	0.000738396		146	0.02	-0.00208	-0.00136		146	0.00676	-0.00128		146	0.01603	-0.0062		146	0.00522	0.001	-0.00205		146	0.01209	-0.000305393	-0.000187439
146.5	0.0294	0.00071299	0.00112		146.5	0.02003	-0.00226	-0.00105		146.5	0.00624	-0.00146		146.5	0.01643	-0.00444		146.5	0.00512	0.00081179	-0.00211		146.5	0.01204	-0.000777699	-0.000575939
147	0.02958	0.00092708	0.000776529		147	0.02022	-0.00181	-0.00138		147	0.00642	-0.000896797		147	0.01611	-0.00592		147	0.00495	0.00102	-0.00221		147	0.01184	-0.000956004	-0.00074419
147.5	0.0296	0.000785171	0.000974596		147.5	0.02009	-0.00231	-0.00107		147.5	0.00678	-0.00144		147.5	0.01723	-0.00488		147.5	0.00507	0.000720713	-0.00209		147.5	0.01215	-0.000362559	-0.000214441
148	0.03008	0.000999262	0.000636662		148	0.0206	-0.00186	-0.0014		148	0.00644	-0.00216		148	0.01619	-0.006		148	0.005	0.000930674	-0.00222		148	0.01184	-0.00128	-0.000529692
148.5	0.02996	0.00104	0.00101		148.5	0.0203	-0.00236	-0.00108		148.5	0.00679	-0.00123		148.5	0.01767	-0.0046		148.5	0.00487	0.000812136	-0.00213		148.5	0.01216	-0.00057217	-0.000367193
149	0.03028	0.000893444	0.000495795		149	0.02082	-0.0019	-0.00125		149	0.00645	-0.00196		149	0.01627	-0.00535		149	0.00517	0.000730097	-0.00183		149	0.01222	-0.00104	-0.000755694
149.5	0.03046	0.000572535	0.000871861		149.5	0.02036	-0.00225	-0.00158		149.5	0.00681	-0.00103		149.5	0.01739	-0.00575		149.5	0.00503	0.000830559	-0.00178		149.5	0.01198	-0.00126	-0.000997194
150	0.03049	0.000965625	0.000712928		150	0.02087	-0.00195	-0.00127		150	0.00629	-0.00175		150	0.01743	-0.00579		150	0.00504	0.00060252	-0.00187		150	0.01237	-0.000776335	-0.000504195
150.5	0.03066	0.000644716	0.000909994											150.5	0.01675	-0.00619		150.5	0.0052	0.000739481	-0.0019		150.5	0.01206	-0.00125	-0.000562196
151	0.03069	0.00104	0.000929061											151	0.01716	-0.00658		151	0.00518	0.000766943	-0.00236		151	0.01244	-0.000618446	-0.000105947
151.5	0.03102	0.000716898	0.000591127											151.5	0.01684	-0.00626		151.5	0.00515	0.000757904	-0.00249		151.5	0.01246	-0.000980501	-0.000457948
152	0.03104	0.000573989	0.000789194											152	0.01616	-0.00666		152	0.00531	0.000821866	-0.00248		152	0.01219	-0.00101	-0.000662698
152.5	0.03137	0.00061008	0.00080826											152.5	0.01692	-0.0067		152.5	0.00535	0.000520827	-0.00257		152.5	0.01247	-0.000749112	-0.000610449
153	0.0314	0.00082517	0.000827327											153	0.01696	-0.00674		153	0.00529	0.000694288	-0.00252		153	0.01205	-0.00126	-0.0006317
153.5	0.03142	0.000861261	0.000667393											153.5	0.01664	-0.00677		153.5	0.00563	0.00053925	-0.00258		153.5	0.01255	-0.000554472	-0.000248701
154	0.0316	0.000361352	0.00086546											154	0.0174	-0.00645		154	0.00553	0.000676211	-0.00254		154	0.01253	-0.00117	-0.000637452
154.5	0.03193	0.000933443	0.000705526											154.5	0.01672	-0.00649		154.5	0.00561	0.000703673	-0.00256		154.5	0.01259	-0.0012	-0.000768953
155	0.0318	0.000433534	0.00108											155	0.01748	-0.00653		155	0.0057	0.000439134	-0.00255		155	0.01275	-0.000831888	-0.00105
155.5	0.03213	0.000826625	0.000386659											155.5	0.01716	-0.00657							155.5	0.01233	-0.00163	-0.000994954
156	0.03216	0.000505715	0.000941726											156	0.01792	-0.0066							156	0.0129	-0.000857748	-0.000391705
156.5	0.03233	0.000719806	0.000603792											156.5	0.01796	-0.00628							156.5	0.01267	-0.00155	-0.000486456
157	0.03236	0.000398897	0.000800859											157	0.018	-0.00632							157	0.01291	-0.00162	-0.000507707
157.5	0.03269	0.000613988	0.000641925											157.5	0.01912	-0.00636							157.5	0.01289	-0.00121	-0.000896458
158	0.03271	0.000650079	0.000660992											158	0.01845	-0.0064							158	0.01243	-0.00183	-0.00114
158.5	0.03304	0.00068617	0.000858058											158.5	0.01849	-0.00644							158.5	0.01293	-0.00105	-0.000791709
159	0.03322	0.00054326	0.000520125											159	0.01817	-0.00683							159	0.01266	-0.00174	-0.00073946
159.5	0.03309	0.000400351	0.000896191											159.5	0.01857	-0.00759							159.5	0.01301	-0.00163	-0.000466711
160	0.03342	0.000615442	0.000379258											160	0.01753	-0.00691							160	0.01307	-0.00155	-0.000781962
160.5	0.0333	0.000472533	0.000934324											160.5	0.01757	-0.00731							160.5	0.01276	-0.00191	-0.000950212
161	0.03362	0.00104	0.000417391											161	0.01797	-0.00735							161	0.01325	-0.00121	-0.000934713
161.5	0.03365	0.000544715	0.000794457											161.5	0.01801	-0.00666							161.5	0.01305	-0.0019	-0.000698964
162	0.03398	0.00112	0.000455524											162	0.01841	-0.00742							162	0.01337	-0.00156	-0.000242465
162.5	0.034	0.000616896	0.00065359											162.5	0.01845	-0.00746							162.5	0.0135	-0.00178	-0.000484216
163	0.03418	0.000831987	0.000672657											163	0.01886	-0.0075							163	0.01322	-0.00214	-0.000468717
163.5	0.03406	0.000868078	0.000512723											163.5	0.01854	-0.00754							163.5	0.01365	-0.00158	-0.000857217
164	0.03438	0.000547169	0.00088979											164	0.01894	-0.00793							164	0.01345	-0.00224	-0.000841718
164.5	0.03441	0.00076126	0.000372856											164.5	0.01862	-0.00689							164.5	0.01365	-0.00179	-0.000311969
165	0.03474	0.00044035	0.000212923											165	0.01902	-0.00801							165	0.01375	-0.00194	-0.00048022
165.5	0.03461	0.000655441	0.000410989											165.5	0.01834	-0.00625							165.5	0.01333	-0.00219	-0.000501471
166	0.03509	0.000333532	0.000608055											166	0.01838	-0.00773							166	0.01375	-0.0017	-0.000853472
166.5	0.03512	0.000727623	0.000270122											166.5	0.01806	-0.00668							166.5	0.01337	-0.00243	-0.00117
167	0.03529	0.000405714	0.000646188											167	0.01846	-0.00744							167	0.01357	-0.0021	-0.000748723
167.5	0.03532	0.000799805	0.000308255											167.5	0.0185	-0.00712							167.5	0.01359	-0.00235	-0.000733224
168	0.0355	0.000299896	0.000506321											168	0.01854	-0.00716							168	0.01317	-0.00256	-0.000607475
168.5	0.03552	0.000692986	0.000167388											168.5	0.01823	-0.00756							168.5	0.01378	-0.00186	-0.000885976
169	0.03585	0.000372077	0.000365454											169	0.01863	-0.00723							169	0.01347	-0.00252	-0.00116
169.5	0.03587	0.000408168	0.000563521											169.5	0.01939	-0.00907							169.5	0.01397	-0.00185	-0.00108
170	0.0359	0.000801259	0.000224587											170	0.01907	-0.00731							170	0.01399	-0.00214	-0.000839478
170.5	0.03623	0.00030135	0.000601654											170.5	0.01947	-0.00807							170.5	0.01364	-0.00246	-0.000419729
171	0.03641	0.000873441	0.00026272											171	0.01843	-0.00775							171	0.0141	-0.00172	-0.00066148
171.5	0.03643	0.000373531	0.000639787											171.5	0.01919	-0.00886							171.5	0.01368	-0.00267	-0.000829731
172	0.03661	0.000766622	0.000122853											172	0.01887	-0.00854							172	0.01414	-0.00204	-0.00111
172.5	0.03679	0.000445713	0.00014192											172.5	0.01927	-0.00894							172.5	0.01405	-0.00259	-0.00117
173	0.03666	0.000481804	0.000338986											173	0.01931	-0.00826							173	0.01381	-0.00288	-0.000672983
173.5	0.03699	0.000517895	0.000358053											173.5	0.01899	-0.00901							173.5	0.01417	-0.00228	-0.000730984
174	0.03717	0.000375986	0.000556119											174	0.01939	-0.00869							174	0.01386	-0.00301	-0.000825735
														174.5	0.01872	-0.00837							174.5	0.01421	-0.00231	-0.00107
														175	0.01912	-0.00877							175	0.01415	-0.00286	-0.00142
														175.5	0.0188	-0.00917							175.5	0.01399	-0.00292	-0.00115
														176	0.02028	-0.00956							176	0.0143	-0.00248	-0.000984238
														176.5	0.01888	-0.00745							176.5	0.01403	-0.00306	-0.000784989
														177	0.02	-0.00892							177	0.01442	-0.00243	-0.00098999
														177.5	0.01932	-0.00752							177.5	0.0144	-0.00298	-0.00123
														178	0.01972	-0.00936							178	0.01416	-0.00312	-0.00136
														178.5	0.01976	-0.00832							178.5	0.01455	-0.0026	-0.00131
														179	0.01944	-0.00907							179	0.01417	-0.00314	-0.00105
														179.5	0.01984	-0.00803							179.5	0.01429	-0.00251	-0.000838994
														180	0.01845	-0.00879
