# Supplementary material for: Impact of energy limitations on function and resilience in long-wavelength Photosystem II
Source: eLife. 2022 Jul 19;11:e79890. doi: 10.7554/eLife.79890 (PMC9439682; doi:10.7554/eLife.79890)
Supplement: Figure 6—source data 2. [file elife-79890-fig6-data2.xlsx]

## Sheet: Sheet1
PSII activities (µmol O2/h/mg Chl)
	A. marina 1	A. marina 2	A. marina 3	WL C. thermalis 1	WL C. thermalis 2	WL C. thermalis 3	FR C. thermalis 1	FR C. thermalis 2	FR C. thermalis 3
Control	68.41	53.08	18.72	273.06	53.93	34.23	122.85	43.43	43.08
Photo-inhibited	0	6.44	3.42	88.38	7.5	7.87	35.33	14.96	15.67
Normalised on Control PSII activity
	A. marina 1	A. marina 2	A. marina 3	WL C. thermalis 1	WL C. thermalis 2	WL C. thermalis 3	FR C. thermalis 1	FR C. thermalis 2	FR C. thermalis 3
Control	1	1	1	1	1	1	1	1	1
Photo-inhibited	0	0.121326	0.182692	0.323665	0.139069	0.229915	0.287586	0.344462	0.363742
